# Supplementary material
Source: HighWire-hosted journal article supplement (doi:10.1101/rna.079625.123)
Supplement: Supplemental_Table_1.xlsx [file Supplemental_Table_1.xlsx]

## Sheet: Sheet1
Table S1. Ribosomal proteins and eIF3 components associated with DRBD18 (Lott, et al. 2015; Bishola Tshitenge and Clayton, 2022)
Note that Lott, et al. study was not quantitative; Bishola Tshitenge and Clayton study was quantitative.		Y=yes; N=no	Proteins found in both studies highlighted in yellow.
Protein	Accession Number	Lott, et al.	Bishola Tshitenge
40S ribosomal protein S10, putative	Tb927.10.5370	Y	Y
40S ribosomal protein S12, putative	Tb927.10.8430	Y	Y
40S ribosomal protein S13, putative	Tb927.10.15120	Y	N
40S ribosomal protein S14 (RPS14)	Tb927.6.4980	Y	Y
40S ribosomal protein S15, putative	Tb927.7.2340	Y	N
40S ribosomal protein S15A, putative	Tb927.11.6140	Y	Y
40S ribosomal protein S17, putative	Tb927.11.11830	Y	N
40S ribosomal protein S18, putative	Tb927.10.5330	Y	N
40S ribosomal protein S2, putative (RPS2)	Tb927.10.14600/10.14710	Y	Y
40S ribosomal protein S27, putative	Tb927.11.9720	Y	Y
40S ribosomal protein S3, putative (RPS3)	Tb927.10.11540/9.6070	Y	Y
40S ribosomal protein S33, putative	Tb927.7.230/7.240	Y	Y
40S ribosomal protein S3A, putative	Tb927.10.3940	Y	N
40S ribosomal protein S4, putative	Tb927.11.3600	Y	N
40S ribosomal protein S5, putative	Tb927.11.6300	Y	Y
40S ribosomal protein S6, putative	Tb927.9.15360	Y	N
40S ribosomal protein SA, putative	Tb927.11.10790	Y	N
40S ribosomal proteins S11, putative	Tb927.10.560	Y	N
40S ribosomal protein S25	Tb927.3.1370	N	Y
40S ribosomal protein SA	Tb927.11.10910	N	Y
60S acidic ribosomal protein P2, putative	Tb927.10.3380	Y	N
60S acidic ribosomal protein P2, putative	Tb927.6.5130	Y	N
60S acidic ribosomal protein, putative	Tb927.9.5690	Y	Y
60S acidic ribosomal subunit protein, putative	Tb927.11.2060	Y	Y
60S ribosomal protein L10, putative,QM-like protein	Tb927.9.8420	Y	N
60S ribosomal protein L10a	Tb927.10.13500/11.9710	Y	Y
60S ribosomal protein L12, putative	Tb927.8.6030	Y	Y
60S ribosomal protein L13, putative	Tb927.3.3310	Y	N
60S ribosomal protein L13a, putative	Tb927.4.3550	Y	N
60S ribosomal protein L18, putative (RPL18)	Tb927.11.4300	Y	Y
60S ribosomal protein L2, putative,60S ribosomal protein L8, putative	Tb927.5.1110	Y	N
60S ribosomal protein L23a, putative	Tb927.7.5180	Y	N
60S ribosomal protein L30 (RPL30)	Tb927.10.4120	Y	Y
60S ribosomal protein L4	Tb927.3.5050	Y	N
60S ribosomal protein L6, putative	Tb927.10.11390	Y	Y
60S ribosomal protein L7a, putative	Tb927.8.1330	Y	N
60S ribosomal protein L9, putative	Tb927.10.1100	Y	Y
60S ribosomal protein-like	Tb927.7.4550	Y	N
RNA-binding protein (NRBD2)	Tb927.11.14020	Y	Y
50S ribosomal protein L7Ae, putative	Tb927.4.750	N	Y
60S ribosomal protein L5	Tb927.9.15150	N	Y
60S ribosomal protein L23	Tb927.9.11410	N	Y
eIF3a	Tb927.7.6090	Y	Y
eIF3b	Tb927.5.2570	Y	N
eIF3c	Tb927.10.8290	Y	N
eIF3d	Tb927.6.4370	Y	N
eIF3e	Tb927.11.11590	Y	N
eIF3f	Tb927.3.1680	Y	N
eIF3g	Tb927.4.1930	Y	N
eIF3k	Tb927.11.15420	Y	N
eIF3l	Tb927.10.4640	Y	N
