# Supplementary material
Source: HighWire-hosted journal article supplement (doi:10.1101/rna.079625.123)
Supplement: Supplemental_Table_2.xlsx [file Supplemental_Table_2.xlsx]

## Sheet: Normalized counts
Table S2. Normalized read counts
	Ribosomal Footprints						Total RNA
Gene ID	Uninduced			induced			Uninduced			induced
Tb927.11.10330	408.569	270.485	514.162	374.152	86.2135	316.531	15333.6	11716.3	63660.5	12231.1	13647	45144.6
Tb927.11.19800.1	18365.1	18582.7	4523.21	5794.98	5275.98	2416.95	22208.3	16567.9	36265.2	18994.8	18184.9	16998.5
Tb11.v5.0823.1	114.268	28.3573	28.4329	88.9702	20.4934	17.6259	2189.86	445.47	28401.5	1012.95	636.727	22587.4
Tb927.10.7650	95.3602	41.4452	167.044	103.269	15.5467	62.425	964.823	1363.24	24944.5	644.191	1840.93	5830.85
Tb11.v5.0802.1	8.22071	8.72531	20.14	12.71	12.72	13.9538	840.211	534.688	13356.4	603.725	707.261	6817.22
Tb11.v5.1004.1	10.6869	8.72531	62.7894	12.71	14.84	44.0647	1782.13	1546.67	10687.5	1061.25	1461.33	5709.87
Tb11.v5.0397.1	372.398	665.305	111.362	94.5308	139.214	68.3003	1174.65	785.499	8023.23	704.89	550.804	7291.09
Tb927.9.2600	20.5518	30.5386	14.2165	35.747	14.84	16.157	376.583	494.134	7279.78	355.056	546.316	3858.11
Tb11.v5.0439.1	72.3422	19.632	49.7577	50.0457	9.89335	30.8453	2052.42	1930.99	6412.02	1413.7	2192.96	5010.84
Tb10.v4.0245	138.93	61.0772	111.362	190.65	21.2	68.3003	1323.08	1087.47	5464.52	964.655	1098.4	2579.35
Tb927.11.1530	27.1283	41.4452	79.3753	19.8594	14.1334	38.9238	1020.71	959.569	5229.99	649.412	920.786	3627.9
Tb927.11.19810.1	71.5202	999.048	611.308	98.5027	348.387	258.513	4595.96	4491.51	5227.65	5111.76	4918.77	9875.48
Tb927.11.9620.2	1.64414	0	1.18471	1.58875	2.12	3.67206	334.435	285.125	4092.53	247.364	378.317	1435.03
Tb927.10.6890	135.642	58.8959	60.42	154.109	32.5067	32.3141	914.428	774.269	3907.25	615.473	795.108	1821.51
Tb11.v5.0581.1	78.0967	67.6212	106.624	120.745	95.4002	95.4735	1045.45	802.968	3879.11	864.796	1037.49	2478.53
Tb11.v5.1045.1	184.966	434.084	196.661	189.062	304.574	165.243	896.103	827.925	3825.17	723.818	949.641	1628.27
Tb927.6.3400	10.6869	2.18133	5.92353	3.17751	2.12	2.20323	238.228	44.2974	3773.57	114.218	54.5033	2896.94
Tb927.11.6730.1	27.9504	63.2585	15.4012	26.2144	9.89335	5.14088	1222.29	1080.61	3360.8	1188.52	1636.38	2833.09
Tb11.v5.1005.1	3.28828	6.54398	8.29294	1.58875	0.706668	5.14088	458.13	406.787	2966.79	257.807	373.829	1603.06
Tb11.v5.0576.1	466.114	314.111	139.795	342.376	96.8135	69.7691	3801.57	3229.97	2765.1	2171.45	2245.54	1638.35
Tb927.10.6650	23.018	4.36266	21.3247	25.4201	7.06668	24.2356	1103.18	811.703	2572.78	732.302	920.786	1840
Tb11.v5.0622.1	1464.93	3359.25	1765.21	1879.5	1142.68	1194.15	1463.27	847.89	2347.63	920.926	962.465	1369.49
Tb11.v5.0869.1	109.335	61.0772	45.0188	80.2321	47.3468	39.6582	684.447	713.75	2211.61	481.675	795.749	1505.6
Tb11.v5.1032.1	7.39864	15.2693	9.47765	11.1213	4.24001	2.20323	3059.39	1375.71	2101.38	1393.46	1160.6	712.473
Tb11.v5.0820.1	63.2994	56.7145	105.439	68.3164	71.3735	119.709	980.399	542.175	1909.07	623.958	693.154	1510.64
Tb11.v5.0469.1	1584.95	1819.23	1713.09	934.982	1074.14	1003.21	1960.8	1271.52	1817.6	1431.97	918.221	907.395
Tb927.1.2390	1572.62	1895.57	1752.18	849.189	1052.23	1004.67	2039.6	1294.61	1787.11	1418.26	881.672	910.756
Tb927.7.4010	18.0856	13.088	27.2482	27.0088	29.6801	31.5797	294.12	197.155	1770.69	248.017	303.295	1969.38
Tb927.1.2350	1495.35	1697.07	1716.64	880.964	1043.75	1038.46	1990.12	1234.09	1721.44	1380.41	879.107	915.797
Tb927.1.2330	1528.23	1795.23	1690.58	937.365	1057.18	1002.47	2044.18	1259.67	1695.64	1367.36	913.733	999.815
Tb927.6.2050	101.115	117.792	61.6047	100.091	81.9735	65.3626	874.113	396.805	1665.16	462.747	522.591	1310.68
Tb927.1.2370	1579.2	1764.69	1694.13	879.375	1064.24	1078.12	2073.5	1321.44	1651.08	1351.69	898.343	873.788
Tb927.6.520	675.742	1411.32	499.946	152.52	344.147	236.48	793.482	1061.27	1651.08	682.046	585.43	1641.71
Tb11.v5.1046.1	1162.41	2292.58	1088.74	1224.13	1798.47	1112.63	2434.5	2161.21	1569	2217.79	2940.62	1668.6
Tb927.10.10260	697.116	2351.47	418.201	191.445	477.001	163.039	1276.35	1762.54	1512.71	975.098	682.254	1364.45
Tb927.10.2090	875.505	1738.52	848.25	968.345	1469.87	970.892	1810.53	1567.88	1390.76	1616.68	2090.36	1440.07
Tb927.3.2590	6.57657	6.54398	9.47765	5.56064	0.706668	5.14088	306.031	300.723	1357.92	154.032	307.142	779.688
Tb927.1.2400	1602.22	1537.84	1758.1	804.704	941.282	909.936	1274.52	887.196	1336.81	805.402	600.819	663.743
Tb927.10.2100	933.05	1714.52	844.695	996.943	1494.6	1017.89	1799.54	1552.9	1329.78	1623.2	2028.81	1465.27
Tb927.10.10250	445.562	1341.52	254.712	125.512	214.827	107.224	676.2	680.683	1285.22	588.061	377.035	1177.93
Tb927.1.2340	1617.01	1553.11	1857.62	904.001	885.455	960.61	1236.04	887.82	1266.46	799.528	573.888	670.464
Tb927.1.2380	1643.32	1513.84	1793.65	889.702	933.508	895.982	1227.79	883.452	1257.07	832.814	587.354	667.103
Tb11.v5.0416.1	3.28828	2.18133	0	4.76626	0	0.734411	113.616	14.3499	1250.04	46.34	27.5723	957.806
Tb927.1.2360	1643.32	1494.21	1727.3	904.001	956.828	912.139	1251.61	882.204	1243	823.677	604.667	712.473
Tb927.3.5050	257.308	717.657	92.4071	441.674	460.748	261.45	1411.96	1005.74	1172.64	1193.74	897.061	920.838
Tb927.2.1180	18.0856	34.9012	39.0953	32.5695	38.1601	25.7044	164.927	74.2449	1165.61	89.4166	73.0986	690.628
Tb927.9.2520	23.8401	26.1759	62.7894	79.4377	44.5201	94.7391	388.495	542.175	1142.16	541.068	599.537	1387.98
Tb11.v5.1035.1	1308.74	1666.53	1146.8	1980.38	1575.16	1490.85	1427.53	896.554	1137.47	1299.48	1288.84	1757.66
Tb927.10.8930	179.211	61.0772	209.693	141.399	75.6135	179.196	289.538	267.656	1118.7	248.67	242.38	544.437
Tb927.9.7620	50.9684	281.391	72.2671	57.1951	154.054	68.3003	755.915	678.187	1057.73	432.071	353.31	584.766
Tb11.v5.0374.1	8.22071	4.36266	11.8471	6.35501	5.65334	5.87529	85.2123	36.8105	1057.73	57.4355	46.1675	789.77
Tb11.v5.0468.1	988.951	946.696	1007	565.596	522.228	588.998	974.901	682.554	1001.44	639.622	437.309	537.716
Tb927.10.2110	934.694	1690.53	880.237	919.094	1476.23	1007.61	1159.07	1040.68	975.64	1161.76	1482.49	1147.69
Tb927.11.9590	1744.43	1448.4	1677.54	1073.2	1100.99	1096.48	1036.29	794.234	952.187	970.529	952.847	983.011
Tb927.4.2070	89.6057	172.325	142.165	206.538	259.347	235.746	758.664	957.697	938.116	1039.06	1104.17	882.19
Tb927.10.4570	993.061	1954.47	830.479	1524.41	1163.18	850.448	1724.4	1198.53	933.425	1642.79	1435.04	1046.86
Tb927.6.480	317.319	680.574	107.808	103.269	142.04	44.7991	443.47	701.895	872.448	457.526	419.996	1043.5
Tb927.11.11360	77.2746	370.826	80.56	112.802	282.667	142.476	765.078	761.167	870.102	612.21	450.775	618.373
Tb927.11.11370	50.1463	314.111	93.5918	110.418	267.827	136.601	700.939	710.63	844.304	567.175	476.423	646.939
Tb927.4.1800	40.2815	117.792	24.8788	65.9333	84.8002	33.0485	647.796	507.86	837.268	510.393	478.347	947.724
Tb927.6.450	310.743	641.31	117.286	94.5308	143.454	58.7529	439.805	645.12	823.196	431.419	353.31	1016.62
Tb11.v5.0755.1	36.9932	65.4398	71.0824	34.9526	40.2801	49.2056	205.242	136.636	816.161	104.428	108.365	465.46
Tb927.10.15410	316.497	316.293	357.781	135.838	190.094	194.619	665.205	582.729	797.398	582.187	489.889	616.692
Tb927.11.11330	995.528	1369.87	1031.88	1544.27	1334.9	1350.58	821.886	582.729	790.362	789.738	847.687	1293.88
Tb11.v5.0955.1	4.93242	0	1.18471	3.97188	0	1.46882	290.455	33.0671	790.362	103.775	31.4196	783.048
Tb11.v5.0858.1	18.9076	10.9066	24.8788	19.8594	18.3734	29.3765	105.37	36.8105	788.017	66.5729	49.3736	636.857
Tb927.11.2400	7.39864	10.9066	1.18471	53.2233	45.9334	17.6259	92.5423	43.0496	778.636	58.0882	75.0223	561.241
Tb927.9.10770	114.268	272.666	82.9294	107.241	148.4	90.3326	719.265	728.099	764.564	671.603	834.863	1023.34
Tb11.v5.0222.1	20.5518	54.5332	30.8024	32.5695	16.96	24.97	327.105	311.953	762.219	295.009	443.721	317.588
Tb927.10.4560	939.627	1947.93	792.568	1577.63	1098.87	850.448	1434.86	1083.73	757.528	1410.43	1265.12	1006.54
Tb927.9.7590	46.858	266.122	69.8977	45.2795	159	63.1594	566.249	554.029	738.766	318.506	312.913	374.721
Tb927.10.7180	490.776	353.375	176.521	195.417	216.947	111.631	1095.85	1094.33	736.421	882.418	697.002	384.803
Tb10.v4.0159	1.64414	0	2.36941	1.58875	2.82667	4.40647	44.8968	12.4781	734.076	24.149	17.3128	547.798
Tb927.3.210	0.822071	6.54398	0	0.794377	0	0	52.2269	15.5977	734.076	31.9811	12.1831	630.135
Tb927.9.2470	743.974	689.3	835.218	869.843	604.908	880.559	624.89	578.986	731.73	627.874	702.131	751.121
Tb927.10.11390	64.9436	377.37	52.1271	169.997	255.814	106.49	513.106	488.519	722.349	443.167	451.416	772.966
Tb927.10.10190	26.3063	28.3573	34.3565	30.1863	19.7867	24.2356	120.03	96.0817	717.658	133.146	124.396	1450.15
Tb927.11.2060	98.6485	316.293	43.8341	140.605	210.587	58.0185	655.126	500.997	705.932	544.332	462.958	601.569
Tb927.10.70	7.39864	10.9066	9.47765	6.35501	4.24001	9.54735	82.4635	31.8193	705.932	37.8552	26.9311	576.364
Tb11.0370	5.75449	6.54398	7.10824	4.76626	6.36001	3.67206	103.537	71.1254	703.587	87.4586	83.9993	771.286
Tb927.9.6290	410.213	327.199	560.366	267.705	252.987	418.614	498.446	437.359	689.515	447.736	406.531	541.076
Tb927.11.6280	323.896	726.382	380.291	483.776	561.801	454.601	623.974	529.697	684.824	723.165	593.766	888.911
Tb11.v5.1029.1	2.46621	0	1.18471	1.58875	0	1.46882	49.4781	11.8542	684.824	27.4124	12.1831	573.003
Tb927.11.740	517.905	903.07	409.908	903.207	792.881	478.836	1040.87	824.805	670.753	790.39	629.674	408.328
Tb927.4.1790	40.2815	102.522	27.2482	62.7558	72.0801	36.7206	632.22	477.289	670.753	471.232	459.752	855.304
Tb927.8.5260	55.9008	176.688	36.7259	51.6345	109.534	23.5012	672.535	734.339	666.062	485.591	555.293	411.688
Tb927.7.3330	82.2071	106.885	246.419	290.742	261.467	380.425	425.145	612.053	651.99	647.454	1242.68	981.331
Tb927.10.2560	652.724	754.739	772.428	152.52	253.694	323.875	584.574	631.394	640.264	331.559	284.7	357.917
Tb927.11.9710	68.2319	231.221	29.6177	96.1196	146.987	43.3303	878.694	653.231	637.919	732.302	587.995	801.532
Tb927.10.13500	25.4842	178.869	9.47765	45.2795	110.947	27.9076	886.024	691.289	635.573	726.428	556.575	796.491
Tb927.7.3550	396.238	444.991	700.161	343.965	343.441	613.968	543.343	436.111	630.883	471.885	512.331	668.784
Tb11.v5.0399.1	43.5697	34.9012	59.2353	46.0739	48.0534	71.9723	149.351	87.9709	630.883	122.05	107.724	527.633
Tb11.v5.0585.1	18.9076	56.7145	30.8024	21.4482	40.2801	37.455	258.386	184.053	630.883	182.749	189.159	277.26
Tb11.v5.0288.1	44.3918	37.0826	15.4012	20.6538	22.6134	18.3603	134.69	102.321	628.537	116.176	101.953	539.396
Tb11.v5.0436.1	21.3738	17.4506	14.2165	19.8594	16.2534	15.4226	85.2123	39.93	623.847	60.0462	51.9385	512.51
Tb927.11.6510	58.367	200.682	42.6494	115.185	165.36	66.8314	616.644	509.732	616.811	434.682	413.584	502.428
Tb927.5.1610	41.9256	329.381	29.6177	53.2233	303.867	29.3765	599.235	515.347	612.12	486.244	425.126	559.56
Tb11.v5.0316.1	3.28828	2.18133	0	2.38313	0.706668	1.46882	38.483	9.3586	602.739	20.8856	12.8243	490.665
Tb927.9.7470	330.472	189.776	131.502	47.6626	43.1067	58.0185	911.679	711.878	598.049	388.342	244.944	332.711
Tb927.10.1590	13.9752	109.066	15.4012	42.8964	76.3201	13.9538	184.168	153.481	591.013	122.703	116.06	458.739
Tb927.10.190	38.6373	170.144	30.8024	39.7188	115.894	39.6582	569.914	494.134	586.322	434.682	408.454	564.601
Tb927.10.16240	1.64414	0	0	0	0	0	33.9016	6.23907	583.977	16.3169	6.41216	494.026
Tb927.10.14710	120.022	591.14	85.2988	181.118	265	164.508	522.269	517.219	579.286	388.995	355.875	492.346
Tb927.11.2050	92.0719	346.831	40.28	120.745	183.734	52.1432	576.328	461.691	574.596	507.129	458.469	598.209
Tb927.11.14020	40.2815	135.242	37.9106	35.747	85.5068	22.7668	504.86	505.989	572.251	400.743	350.745	566.282
Tb927.6.5370	4.11035	0	0	0.794377	0.706668	0.734411	41.2317	9.98251	567.56	15.6642	13.4655	457.058
Tb11.v5.0445.1	4.93242	0	2.36941	4.76626	1.41334	0	52.2269	18.7172	567.56	42.4239	25.6486	410.008
Tb927.11.20720	2.46621	2.18133	0	0	0	0.734411	39.3992	6.86298	562.869	16.9696	14.1067	509.149
Tb927.10.12850	55.9008	56.7145	45.0188	62.7558	62.8935	69.0347	415.066	348.764	555.834	476.453	393.065	356.237
Tb927.11.14000	75.6305	163.6	29.6177	119.951	88.3335	25.7044	448.052	423.009	551.143	348.529	293.036	537.716
Tb927.11.16200	994.706	815.817	1483.25	617.231	640.948	1469.56	309.696	305.714	546.452	324.38	297.524	739.359
Tb927.10.11540	53.4346	229.039	46.2035	96.1196	139.92	77.8476	449.884	461.067	539.417	383.121	354.592	421.771
Tb927.3.1370	20.5518	122.154	17.7706	34.9526	62.8935	31.5797	577.244	401.172	539.417	420.323	318.684	369.679
Tb927.10.20	2.46621	0	0	1.58875	0.706668	0.734411	33.9016	12.4781	539.417	21.5383	17.954	436.894
Tb927.5.3800	314.031	351.194	478.621	256.584	349.094	357.658	683.531	538.432	530.035	393.564	354.592	315.908
Tb927.9.15810	9.04278	13.088	15.4012	4.76626	9.18668	16.8915	76.0496	40.554	530.035	39.8132	32.702	312.547
Tb927.9.1850	83.0291	237.765	48.5729	101.68	178.787	67.5658	802.644	461.691	527.69	532.584	380.241	295.744
Tb11.v5.0519.1	20.5518	23.9946	20.14	15.0932	15.5467	11.0162	133.774	120.414	525.345	81.5845	89.7702	504.108
Tb927.10.8940	290.191	416.634	337.641	274.854	257.934	299.64	369.253	374.344	522.999	366.804	382.165	603.25
Tb11.v5.1000.1	3.28828	0	2.36941	0	0.706668	0	33.9016	9.3586	522.999	15.6642	13.4655	452.017
Tb11.v5.0294.1	10.6869	43.6266	17.7706	18.2707	45.2268	27.1732	84.296	89.8426	513.618	54.1721	64.7628	373.04
Tb927.11.4290	9.04278	28.3573	4.73882	5.56064	18.3734	7.34411	466.377	418.642	513.618	365.498	324.455	413.369
Tb927.8.6150	84.6733	373.007	42.6494	143.782	233.907	93.2702	437.973	409.907	511.273	383.121	370.623	356.237
Tb927.1.3670	27.9504	10.9066	29.6177	42.102	30.3867	28.642	91.6261	53.0321	508.928	65.2676	55.1446	418.41
Tb11.v5.0881.1	64.9436	139.605	62.7894	127.1	103.88	110.896	539.678	666.957	501.892	658.55	759.2	430.172
Tb927.3.1380	430.765	425.359	430.048	320.134	276.307	398.051	1048.2	741.202	490.165	965.96	680.33	641.898
Tb927.4.1300	2282.89	852.899	1556.7	1620.53	1057.88	1622.31	388.495	330.671	485.475	366.151	346.898	396.565
Tb11.v5.0323.1	1.64414	0	1.18471	1.58875	0	0.734411	43.0643	11.2303	485.475	21.5383	8.33581	465.46
Tb11.v5.0410.1	46.036	128.698	52.1271	90.559	120.84	103.552	440.721	590.216	483.13	575.007	650.193	435.214
Tb11.v5.1020.1	8.22071	13.088	10.6624	16.6819	9.89335	13.2194	72.3846	32.4432	483.13	38.5079	31.4196	268.858
Tb11.v5.0470.1	677.386	850.718	947.765	367.796	505.268	445.053	439.805	371.225	478.439	323.727	268.028	304.145
Tb927.9.1810	62.4774	250.853	43.8341	96.914	180.2	66.097	772.408	477.289	476.094	517.572	353.951	315.908
Tb11.v5.1025.1	2.46621	0	0	2.38313	0	0.734411	50.3943	10.6064	476.094	21.5383	14.1067	431.853
Tb927.11.3250	73.9864	67.6212	120.84	116.773	69.9601	211.51	363.756	324.432	473.748	377.247	352.028	561.241
Tb927.8.3250	113.446	80.7091	120.84	214.482	130.734	171.118	426.978	363.114	471.403	593.282	563.629	594.848
Tb927.7.1740	66.5877	159.237	31.9871	73.0827	144.16	45.5335	503.027	363.738	469.058	415.102	365.493	399.926
Tb927.6.4280	333.761	510.431	270.113	112.802	181.614	94.7391	369.253	489.767	464.367	242.143	239.815	205.004
Tb927.9.12240	62.4774	294.479	58.0506	150.137	212.707	62.425	457.214	399.924	464.367	379.857	354.592	428.492
Tb927.11.6180	66.5877	316.293	39.0953	68.3164	182.32	58.0185	1071.11	668.828	464.367	834.772	484.118	510.83
Tb11.v5.0129.1	3.28828	0	1.18471	2.38313	0.706668	1.46882	30.2366	8.11079	464.367	15.0115	10.9007	394.885
Tb927.10.15700	145.507	122.154	158.751	169.997	94.6935	196.088	303.282	287.621	462.022	396.827	372.546	342.794
Tb927.11.3230	73.9864	189.776	34.3565	77.8489	154.76	55.8153	567.165	505.989	462.022	467.969	407.813	324.31
Tb927.7.1750	50.9684	154.874	17.7706	73.877	158.294	52.1432	567.165	399.3	459.677	468.621	363.569	389.844
Tb927.9.860	0.822071	0	0	2.38313	0.706668	0.734411	30.2366	7.48688	459.677	15.0115	10.2595	379.762
Tb927.10.1450	81.385	50.1705	116.101	96.1196	91.1602	77.8476	258.386	318.816	454.986	263.681	393.707	388.163
Tb927.6.4300	310.743	523.519	254.712	119.951	171.014	80.0508	393.076	491.639	452.641	236.921	264.822	198.283
Tb927.3.930	88.7836	61.0772	170.598	136.633	81.9735	185.806	312.445	275.767	447.95	336.781	337.28	463.78
Tb927.9.1750	84.6733	102.522	124.394	151.726	118.014	162.305	287.706	292.612	445.605	434.682	446.286	470.501
Tb927.9.6210	733.287	569.327	940.657	528.261	508.801	763.053	467.293	289.493	443.26	466.011	348.18	408.328
Tb11.v5.1044.1	150.439	41.4452	124.394	37.3357	27.5601	99.1455	98.0399	64.2624	440.914	65.9203	73.0986	398.246
Tb927.7.1730	48.5022	242.127	39.0953	81.8208	151.227	45.5335	538.761	397.429	440.914	393.564	346.257	403.287
Tb927.1.120	211.272	222.495	280.775	185.09	157.587	140.273	441.638	346.268	438.569	223.868	314.196	304.145
Tb927.9.6510	14.7973	10.9066	18.9553	15.0932	33.9201	24.2356	151.183	151.609	438.569	148.157	151.968	268.858
Tb927.10.1100	56.7229	172.325	74.6365	127.895	209.88	141.741	511.274	345.644	433.878	426.197	413.584	347.835
Tb927.10.6510	732.465	900.888	427.679	731.621	645.895	527.307	776.989	663.837	426.843	843.257	691.872	453.697
Tb927.6.720	20.5518	113.429	3.55412	21.4482	45.9334	21.2979	376.583	321.936	426.843	278.04	234.044	485.624
Tb927.8.6160	93.7161	333.743	45.0188	152.52	221.187	78.582	375.667	347.516	424.497	335.475	326.379	388.163
Tb927.9.17640	2.46621	0	0	1.58875	0	0.734411	36.6504	14.9738	424.497	15.6642	12.8243	369.679
Tb927.10.2840	60.8332	257.397	48.5729	77.8489	182.32	58.0185	390.327	319.44	422.152	323.075	243.662	331.031
Tb11.v5.0981.1	4.11035	6.54398	4.73882	1.58875	2.12	2.20323	967.571	718.117	422.152	911.136	676.483	608.291
Tb11.v5.0299.1	1.64414	0	0	1.58875	0	0	31.1529	1.24781	422.152	13.0535	5.12973	283.981
Tb927.9.2075	58.367	71.9838	100.7	106.447	67.1335	132.194	221.735	331.919	419.807	238.227	470.652	436.894
Tb927.11.14130	22.1959	128.698	14.2165	37.3357	77.7335	11.7506	356.425	324.432	419.807	311.979	278.929	287.342
Tb927.11.2610	441.452	429.722	409.908	416.253	371.001	382.628	337.184	295.732	417.461	332.865	370.623	425.131
Tb927.4.4620	203.051	263.941	330.533	119.951	230.374	273.935	364.672	297.604	417.461	315.895	258.41	346.154
Tb927.11.6500	68.2319	130.88	41.4647	112.802	138.507	55.0808	356.425	371.225	417.461	309.368	283.417	485.624
Tb927.6.3490	33.7049	37.0826	45.0188	122.334	79.8535	54.3464	285.873	284.502	417.461	237.574	248.151	332.711
Tb927.4.3550	25.4842	207.226	22.5094	37.3357	247.334	23.5012	323.44	363.738	415.116	300.884	300.73	391.524
Tb927.8.1110	16.4414	95.9784	17.7706	23.8313	75.6135	19.8291	558.919	447.341	415.116	459.484	404.607	418.41
Tb927.7.2640	424.188	224.677	445.449	212.893	182.32	147.617	392.16	306.338	412.771	221.257	239.815	299.104
Tb927.6.4690	111.802	285.754	68.713	113.596	216.947	86.6605	463.628	384.951	412.771	420.976	339.844	391.524
Tb927.2.340	171.813	196.32	194.292	129.483	158.294	161.57	404.987	343.149	410.426	284.567	283.417	334.392
Tb927.11.8200	54.2567	174.506	31.9871	48.457	114.48	27.9076	560.752	584.601	410.426	547.595	376.394	325.99
Tb10.v4.0096	3.28828	0	1.18471	1.58875	0	0	33.9016	8.7347	410.426	13.7062	5.77094	294.063
Tb927.11.7900	178.389	464.623	154.012	146.96	483.361	148.351	463.628	424.257	408.08	471.885	387.294	428.492
Tb927.11.10340	14.7973	17.4506	21.3247	19.8594	24.7334	30.1109	267.548	373.72	405.735	222.562	234.685	287.342
Tb11.v5.1008.1	3.28828	0	1.18471	0	1.41334	0	29.3203	5.61516	405.735	10.4428	8.33581	336.072
Tb927.10.8430	59.1891	117.792	26.0635	90.559	86.9202	38.1894	385.746	349.388	401.044	298.926	278.288	381.442
Tb927.11.18250.1	2.46621	0	1.18471	0.794377	0	0.734411	38.483	11.2303	394.009	13.0535	12.1831	322.629
Tb927.10.12710	351.846	368.644	434.787	715.734	535.654	694.753	609.313	370.601	391.663	680.741	664.3	646.939
Tb927.8.1590	142.218	148.33	203.769	218.454	143.454	351.783	347.263	320.064	391.663	454.915	427.691	623.414
Tb927.11.11725	63.2994	213.77	58.0506	70.6995	211.294	73.4411	513.106	462.939	389.318	416.407	342.409	426.812
Tb11.v5.0477.1	50.1463	56.7145	58.0506	47.6626	67.8401	58.0185	128.277	87.347	389.318	108.997	92.3351	376.401
Tb927.2.1210	26.3063	80.7091	46.2035	50.8401	50.8801	47.7367	169.508	127.277	389.318	105.081	98.106	292.383
Tb927.10.6400	466.114	885.619	229.833	416.253	503.854	263.654	768.743	557.773	386.973	808.665	664.941	441.935
Tb927.1.2100	334.583	311.93	518.901	104.858	104.587	185.806	374.751	285.749	386.973	135.104	133.373	203.324
Tb927.11.4300	80.5629	573.689	114.916	149.343	269.947	157.898	357.342	336.91	386.973	316.548	234.044	337.753
Tb927.1.2470	938.805	281.391	127.948	526.672	170.307	124.116	382.081	355.003	386.973	195.15	200.701	283.981
Tb927.10.4110	93.7161	194.138	59.2353	108.83	162.534	92.5358	324.356	358.123	384.627	228.437	218.013	408.328
Tb927.9.15420	120.022	248.671	30.8024	135.044	181.614	47.0023	384.83	423.009	382.282	358.319	339.844	589.807
Tb11.v5.0501.1	35.349	250.853	27.2482	56.4008	183.027	43.3303	509.441	389.942	382.282	412.491	319.325	287.342
Tb927.8.1990	552.432	423.178	260.635	264.527	235.32	315.797	261.134	242.076	379.937	300.884	255.204	467.14
Tb927.10.5840	323.074	643.492	330.533	227.192	515.868	269.529	550.673	562.764	379.937	590.672	468.088	299.104
Tb927.6.3150	74.8084	56.7145	104.254	123.923	86.9202	116.037	349.095	318.193	379.937	358.319	353.951	346.154
Tb927.11.15880	63.2994	407.908	93.5918	126.306	240.267	88.1294	343.598	280.758	379.937	225.826	213.525	252.054
Tb927.3.2600	217.849	301.023	248.788	169.202	183.734	214.448	438.889	338.158	377.592	422.281	298.807	310.867
Tb927.1.2450	965.111	257.397	125.579	497.28	200.694	126.319	388.495	346.892	377.592	230.395	218.655	265.497
Tb927.9.5690	32.0608	167.962	10.6624	29.3919	65.0135	14.6882	346.347	321.936	377.592	265.639	277.646	438.574
Tb927.4.1000	128.243	91.6158	264.189	51.6345	53.7068	99.1455	146.602	130.397	375.246	96.596	92.9763	263.817
Tb927.8.6030	48.5022	266.122	16.5859	84.2039	168.894	19.0947	437.973	356.251	372.901	414.449	347.539	324.31
Tb927.11.11220	129.065	78.5278	132.687	145.371	79.8535	128.522	344.514	282.63	370.556	345.266	318.684	369.679
Tb927.10.3930	51.7905	246.49	24.8788	77.0546	167.48	42.5959	518.604	379.959	370.556	396.827	307.142	280.62
Tb927.2.2520	373.22	416.634	495.207	227.192	330.014	381.159	368.337	357.499	365.865	368.762	277.005	351.195
Tb11.v5.0404.1	139.752	174.506	140.98	109.624	141.334	181.4	217.154	202.146	365.865	246.711	272.517	408.328
Tb927.11.2930	107.691	122.154	61.6047	77.0546	64.3068	48.4711	255.637	227.726	365.865	217.994	214.807	346.154
Tb927.2.5760	109.335	111.248	190.738	146.165	99.6402	169.649	292.287	217.12	363.52	353.098	326.379	425.131
Tb927.8.760	187.432	656.58	642.111	109.624	363.934	544.199	775.157	454.204	358.829	621.347	359.081	292.383
Tb927.10.12260	300.878	464.623	361.335	151.726	205.64	177.728	304.199	277.639	358.829	193.192	157.098	206.684
Tb927.9.5040	101.937	82.8905	210.878	57.1951	62.8935	167.446	378.416	268.904	358.829	323.075	303.936	389.844
Tb927.10.9080	121.666	148.33	63.9741	9.53252	41.6934	20.5635	434.308	345.021	358.829	394.216	253.28	581.405
Tb927.8.7100	122.489	128.698	196.661	179.529	166.774	226.199	393.992	278.886	356.484	352.445	324.455	418.41
Tb927.2.5270	105.225	85.0718	138.611	136.633	105.294	126.319	333.519	271.4	354.139	327.643	357.798	399.926
Tb927.9.8070	175.923	632.585	75.8212	261.35	308.107	116.771	329.854	288.869	354.139	264.986	207.113	206.684
Tb11.v5.0546.1	97.8264	133.061	52.1271	87.3815	108.827	56.5497	170.425	160.344	354.139	199.066	125.678	277.26
Tb927.11.11830	41.1035	137.424	41.4647	45.2795	106	28.642	357.342	277.639	354.139	246.711	192.365	272.218
Tb927.11.17000	249.087	298.842	276.037	184.295	339.201	305.515	286.79	241.452	351.793	336.781	341.127	403.287
Tb927.7.2660	229.358	91.6158	516.532	148.548	146.987	259.247	276.711	265.784	351.793	163.822	198.777	208.365
Tb927.11.3590	45.2139	287.935	56.8659	77.0546	147.694	52.1432	591.904	422.385	351.793	468.621	359.081	267.177
Tb927.10.3280	111.802	458.079	41.4647	172.38	214.827	49.2056	371.086	304.467	349.448	342.655	293.677	319.269
Tb927.10.1510	115.09	163.6	138.611	112.802	101.054	127.788	253.804	195.283	347.103	221.257	196.853	320.949
Tb927.8.1330	46.858	253.034	61.6047	85.7927	95.4002	53.612	419.647	368.105	347.103	323.727	302.654	536.035
Tb927.7.3680	36.9932	119.973	17.7706	37.3357	64.3068	28.642	274.878	285.125	347.103	249.975	221.219	267.177
Tb11.v5.0825.1	55.0787	8.72531	39.0953	28.5976	23.32	27.1732	54.9756	33.691	347.103	43.7293	42.3202	295.744
Tb927.4.3950	426.655	477.711	482.175	166.819	219.067	237.949	476.456	362.49	344.758	314.59	217.372	206.684
Tb927.11.8160	86.3174	82.8905	112.547	137.427	96.8135	152.758	386.662	300.723	344.758	450.999	427.691	480.583
Tb11.v5.0366.1	63.2994	87.2531	98.3306	54.812	65.7201	104.286	194.247	264.537	340.067	157.948	312.272	273.899
Tb927.4.870	72.3422	41.4452	80.56	94.5308	48.0534	77.8476	331.686	323.808	340.067	311.979	261.616	297.424
Tb927.11.730	8.22071	4.36266	8.29294	4.76626	4.94668	3.67206	37.5667	19.965	337.722	22.191	20.5189	314.228
Tb927.8.4780	80.5629	69.8025	104.254	102.475	79.1468	145.413	252.888	205.889	333.031	272.166	321.249	453.697
Tb07.11L3.100	155.371	196.32	232.202	81.0264	113.774	94.0046	350.928	348.14	333.031	221.91	239.174	152.913
Tb927.11.10025	44.3918	143.968	24.8788	61.167	93.2802	35.9862	158.513	172.198	333.031	144.894	123.113	299.104
Tb11.0360	1.64414	0	1.18471	2.38313	2.82667	1.46882	43.0643	41.1779	333.031	37.8552	53.8621	299.104
Tb927.1.1930	98.6485	65.4398	277.221	151.726	91.8668	422.287	204.326	225.854	330.686	214.078	231.479	339.433
Tb927.11.15450	137.286	63.2585	94.7765	362.236	151.934	219.589	352.76	320.064	330.686	496.686	600.819	384.803
Tb927.11.6440	121.666	176.688	151.642	102.475	118.014	162.305	249.223	218.367	330.686	234.311	272.517	500.748
Tb927.1.2510	1022.66	266.122	119.655	533.821	192.92	140.273	409.569	370.601	330.686	229.742	173.128	230.209
Tb927.5.1110	36.1711	174.506	52.1271	77.0546	154.054	91.067	410.485	379.335	330.686	368.762	299.448	322.629
Tb927.10.3940	47.6801	235.583	24.8788	53.2233	173.134	58.7529	487.451	337.534	330.686	361.582	310.348	283.981
Tb927.4.2180	40.2815	111.248	24.8788	64.3445	67.1335	19.8291	367.421	298.228	330.686	295.662	306.501	278.94
Tb927.10.1500	622.308	130.88	894.453	190.65	179.494	302.577	263.883	173.446	328.34	217.994	171.205	211.725
Tb11.v5.0199.1	124.955	165.781	172.967	208.921	158.294	142.476	407.736	308.834	328.34	340.697	308.425	280.62
Tb927.10.14600	104.403	508.249	62.7894	123.923	301.747	87.3949	437.056	410.531	328.34	341.349	337.28	359.597
Tb11.v5.0214.1	42.7477	28.3573	33.1718	56.4008	18.3734	22.7668	176.838	171.574	328.34	178.833	191.724	391.524
Tb927.2.4210	574.627	628.222	589.984	353.498	410.574	410.536	404.071	361.866	325.995	435.987	295.601	258.776
Tb927.9.8420	180.033	674.03	74.6365	284.387	293.267	116.771	329.854	296.98	325.995	257.154	244.944	255.415
Tb927.8.1340	44.3918	215.951	37.9106	61.9614	85.5068	45.5335	437.973	397.429	325.995	352.445	344.974	584.766
Tb927.3.4020	10.6869	4.36266	22.5094	22.2426	13.4267	13.2194	65.9708	48.6647	323.65	93.9853	83.3581	440.255
Tb11.v5.0650.1	495.709	578.052	465.589	409.104	419.761	503.806	395.825	326.927	321.305	351.792	323.173	346.154
Tb927.3.1410	177.567	137.424	199.031	146.165	110.24	207.104	264.799	186.548	321.305	270.208	193.006	273.899
Tb927.10.1090	87.1395	368.644	40.28	141.399	287.614	88.1294	419.647	317.569	321.305	377.247	317.402	302.465
Tb927.7.190	353.49	407.908	331.718	247.051	314.467	327.547	545.175	406.787	318.959	428.808	293.036	260.456
Tb927.1.2430	942.915	248.671	125.579	505.224	175.96	146.148	380.248	354.379	316.614	237.574	194.93	299.104
Tb927.7.920	76.4526	63.2585	114.916	100.886	79.1468	111.631	350.928	274.519	316.614	390.3	335.356	369.679
Tb927.11.15900	65.7657	397.002	74.6365	118.362	250.16	97.6767	316.11	263.913	316.614	235.616	185.311	238.611
Tb927.6.5040	36.9932	130.88	21.3247	57.1951	92.5735	46.2679	376.583	340.653	316.614	324.38	276.364	289.022
Tb927.7.5180	31.2387	128.698	14.2165	33.3638	103.174	22.0323	284.041	287.621	316.614	241.49	198.136	371.36
Tb927.11.7620	4.93242	6.54398	3.55412	7.14939	2.12	4.40647	50.3943	56.7755	316.614	28.0651	44.8851	231.89
Tb927.11.3570	400.348	213.77	439.526	482.187	310.934	572.841	306.031	243.948	314.269	325.033	298.807	305.826
Tb11.v5.0538.1	244.155	248.671	379.106	228.781	216.24	254.841	236.395	188.42	314.269	231.7	302.013	255.415
Tb927.9.15110	102.759	242.127	127.948	147.754	197.867	233.543	383.913	275.143	314.269	295.009	269.952	325.99
Tb927.10.6070	100.293	124.336	148.088	156.492	86.2135	108.693	345.43	277.639	314.269	335.475	282.776	287.342
Tb927.9.8740	177.567	281.391	135.056	122.334	161.12	87.3949	387.578	396.805	314.269	340.044	456.546	420.09
Tb927.4.1860	80.5629	427.54	47.3882	145.371	200.694	72.7067	332.603	328.799	314.269	270.208	282.135	307.506
Tb927.10.5340	11.509	165.781	13.0318	32.5695	135.68	13.9538	368.337	317.569	314.269	319.158	255.204	352.876
Tb927.11.16550	79.7409	74.1652	223.909	88.1758	77.0268	223.261	159.429	126.029	311.923	174.917	185.953	379.762
Tb927.10.7330	95.3602	318.474	36.7259	149.343	221.187	74.1755	390.327	350.636	311.923	306.105	289.188	294.063
Tb927.9.12200	44.3918	148.33	17.7706	54.0176	118.014	36.7206	383.913	308.21	311.923	339.391	298.165	366.319
Tb11.v5.0567.1	43.5697	52.3519	36.7259	33.3638	31.0934	27.9076	107.203	70.5015	311.923	65.9203	67.3277	231.89
Tb927.10.11760	187.432	137.424	274.852	200.183	207.76	297.437	256.553	185.3	309.578	284.567	283.417	396.565
Tb927.4.3740	83.0291	159.237	183.629	121.54	164.654	210.042	214.405	198.402	309.578	234.311	330.226	420.09
Tb927.4.560	69.0539	26.1759	158.751	54.812	46.6401	136.601	239.144	215.872	309.578	169.043	164.151	208.365
Tb927.10.270	36.9932	133.061	24.8788	46.0739	108.12	30.1109	368.337	288.245	309.578	291.093	206.472	226.849
Tb927.9.11490	35.349	141.786	14.2165	50.8401	87.6268	24.2356	297.785	246.443	309.578	255.849	187.876	302.465
Tb927.8.910	175.101	122.154	271.298	125.512	166.774	212.979	190.582	193.411	307.233	116.829	127.602	253.735
Tb927.1.2550	984.841	248.671	137.426	496.486	197.867	132.928	398.573	314.449	307.233	217.994	155.174	186.52
Tb927.1.2530	919.897	296.661	133.872	529.849	202.107	127.788	422.396	310.082	307.233	217.994	182.747	278.94
Tb927.10.2890	511.328	556.239	395.692	367.002	421.881	555.215	352.76	300.099	304.888	333.517	316.119	393.204
Tb927.10.5030	55.9008	357.738	47.3882	93.7365	227.547	60.9561	393.992	326.303	304.888	331.559	331.509	270.538
Tb927.11.9530	400.348	362.1	277.221	398.777	339.907	316.531	407.736	406.163	302.542	370.72	396.913	309.186
Tb11.v5.0543.1	171.813	370.826	156.381	320.134	332.134	235.012	347.263	317.569	302.542	460.789	527.721	416.73
Tb927.10.7410	244.977	462.442	199.031	219.248	257.227	223.261	462.712	386.198	302.542	445.778	369.34	379.762
Tb927.1.2490	927.296	235.583	122.025	469.477	206.347	138.069	372.002	334.414	302.542	208.856	168.64	245.333
Tb927.2.450	96.1823	176.688	143.349	124.717	111.654	108.693	313.361	233.965	300.197	178.833	226.99	193.242
Tb927.9.10230	65.7657	364.282	98.3306	92.9421	212	104.286	289.538	287.621	297.852	295.662	318.043	379.762
Tb927.8.1890	136.464	89.4344	91.2224	80.2321	53.7068	63.8938	310.612	268.28	297.852	275.429	203.907	260.456
Tb927.9.8130	339.515	630.404	113.732	289.948	542.721	171.852	309.696	257.05	295.506	253.891	228.273	341.113
Tb927.9.11270	221.959	274.847	185.999	177.146	186.56	141.007	467.293	366.233	295.506	372.678	371.905	315.908
Tb927.6.510	151.261	495.161	72.2671	41.3076	96.8135	22.7668	279.46	471.05	295.506	204.288	271.234	221.808
Tb11.01.1680.v5.1	435.697	233.402	341.195	613.259	438.134	386.3	252.888	181.557	293.161	321.117	235.967	250.374
Tb927.11.10660	20.5518	26.1759	58.0506	127.895	101.054	121.912	125.528	163.464	293.161	281.956	447.569	404.967
Tb927.1.2230	66.5877	133.061	143.349	27.0088	64.3068	64.6282	218.07	228.974	293.161	125.966	113.495	201.643
Tb927.11.3600	29.5945	154.874	29.6177	51.6345	125.787	41.127	429.726	313.825	293.161	306.105	279.57	218.447
Tb927.2.6090	24.6621	117.792	22.5094	27.8032	80.5602	29.3765	397.657	373.096	293.161	293.051	277.005	238.611
Tb927.1.3180	23.018	111.248	8.29294	34.9526	89.7468	18.3603	289.538	257.674	293.161	246.059	270.593	263.817
Tb927.11.10030	1069.51	488.617	276.037	1116.1	550.494	421.552	277.627	175.318	290.816	206.246	132.09	210.045
Tb927.10.5480	101.115	255.215	326.979	132.661	375.241	286.42	155.764	179.685	290.816	100.512	117.984	144.511
Tb927.9.11470	29.5945	185.413	10.6624	55.6064	72.0801	25.7044	315.194	232.717	290.816	257.154	196.853	278.94
Tb927.1.2780	4.11035	2.18133	2.36941	0.794377	3.53334	4.40647	61.3895	40.554	290.816	44.382	41.0378	272.218
Tb927.8.6110	244.155	226.858	181.26	208.127	197.867	151.289	315.194	293.236	288.471	353.098	297.524	289.022
Tb927.8.5580	58.367	50.1705	85.2988	64.3445	64.3068	121.178	198.829	185.3	288.471	281.956	244.303	374.721
Tb927.9.15190	94.5381	126.517	48.5729	110.418	112.36	84.4573	260.218	218.367	288.471	180.139	141.067	146.191
Tb927.2.470	87.9616	137.424	107.808	91.3533	73.4935	74.91	262.967	193.411	288.471	153.379	157.739	196.602
Tb927.8.5120	83.0291	292.298	58.0506	38.9245	114.48	55.8153	476.456	494.758	288.471	264.334	233.403	236.931
Tb927.6.2030	20.5518	21.8133	54.4965	22.2426	12.72	24.97	139.272	121.662	286.125	86.1532	87.8466	186.52
Tb927.3.3310	25.4842	109.066	13.0318	30.9807	78.4401	17.6259	322.524	270.152	286.125	260.418	230.838	327.67
Tb927.10.7230	123.311	102.522	130.318	186.679	107.414	160.836	274.878	242.076	283.78	295.662	328.303	374.721
Tb927.11.16130	178.389	311.93	135.056	162.847	159	106.49	431.559	364.362	283.78	396.827	362.287	221.808
Tb927.8.3150	204.696	346.831	274.852	251.023	303.867	260.716	391.243	326.303	281.435	379.857	379.6	287.342
Tb927.11.13020	302.522	331.562	297.361	251.817	209.174	176.993	196.08	244.572	281.435	198.413	223.784	211.725
Tb927.9.12650	166.058	237.765	165.859	155.698	173.134	165.977	258.386	225.854	281.435	248.67	241.738	247.013
Tb11.v5.0779.1	18.9076	32.7199	33.1718	18.2707	13.4267	27.9076	82.4635	66.1341	281.435	76.3631	74.381	287.342
Tb927.7.1050	40.2815	95.9784	15.4012	50.8401	62.1868	11.7506	249.223	245.195	281.435	182.097	189.8	231.89
Tb927.9.2490	397.06	303.205	471.513	519.522	354.747	515.557	210.74	192.787	279.089	231.047	234.044	262.136
Tb11.v5.0287.1	13.1531	17.4506	9.47765	13.5044	12.72	11.0162	65.0545	78.6123	279.089	49.6034	67.9689	216.767
Tb927.9.11540	175.923	218.133	264.189	197.005	202.107	252.637	280.376	218.991	276.744	268.25	263.54	290.702
Tb927.9.5900	240.867	233.402	251.158	220.042	169.6	199.76	347.263	248.315	276.744	445.778	217.372	226.849
Tb927.2.560	68.2319	78.5278	62.7894	77.8489	68.5468	57.2841	157.597	128.525	276.744	96.596	109.007	184.84
Tb11.v5.0181.1	45.2139	185.413	17.7706	53.2233	124.374	35.2517	239.144	200.898	276.744	199.719	198.136	169.716
Tb927.3.3320	36.1711	137.424	13.0318	45.2795	67.1335	22.7668	372.918	322.56	276.744	272.819	258.41	317.588
Tb927.11.10910	25.4842	100.341	11.8471	32.5695	73.4935	18.3603	347.263	340.653	276.744	332.212	273.158	297.424
Tb927.11.2690	210.45	255.215	214.432	153.315	132.854	190.947	275.794	248.939	274.399	345.266	279.57	299.104
Tb927.11.15100	110.157	126.517	212.062	84.9983	106	132.194	184.168	209.009	274.399	178.181	231.479	257.095
Tb927.8.6180	100.293	218.133	67.5282	153.315	125.787	98.4111	350.012	310.706	274.399	281.303	252.639	262.136
Tb927.2.2510	350.202	464.623	488.099	200.977	308.107	375.284	284.957	239.58	272.054	287.177	236.609	310.867
Tb927.9.8880	278.682	191.957	248.788	255.789	195.747	221.792	514.939	406.787	272.054	351.792	294.959	257.095
Tb927.9.15360	73.9864	198.501	56.8659	91.3533	163.947	64.6282	209.824	229.598	272.054	183.402	167.999	297.424
Tb11.v5.1059.1	39.4594	226.858	43.8341	54.0176	153.347	43.3303	485.618	367.481	272.054	383.121	348.18	240.292
Tb927.11.6200	59.1891	222.495	28.4329	76.2602	142.04	31.5797	370.169	306.962	272.054	308.716	221.219	441.935
Tb11.1420	797.409	475.53	534.302	1076.38	715.855	992.19	286.79	287.621	269.708	265.639	310.348	263.817
Tb927.11.6590	230.18	117.792	292.622	143.782	132.147	185.072	285.873	191.539	269.708	278.04	171.205	247.013
Tb927.8.2770	76.4526	67.6212	78.1906	57.9895	42.4001	58.0185	225.4	223.359	269.708	213.425	201.342	273.899
Tb927.9.6070	29.5945	161.418	22.5094	51.6345	79.8535	26.4388	333.519	281.382	269.708	263.681	211.601	228.529
Tb927.6.5120	33.7049	242.127	9.47765	35.747	89.7468	21.2979	229.981	242.7	269.708	187.318	166.075	216.767
Tb927.7.6500	0	2.18133	0	1.58875	2.12	0	9.16261	1.87172	269.708	9.13746	5.12973	240.292
Tb927.9.6250	362.533	274.847	507.054	227.192	246.627	372.347	262.967	172.198	267.363	274.777	180.182	310.867
Tb927.9.8100	307.454	562.783	107.808	269.294	513.041	164.508	237.312	240.828	267.363	207.551	178.899	250.374
Tb927.8.6170	240.867	320.655	242.865	135.838	190.8	154.961	380.248	282.006	267.363	274.777	205.83	235.251
Tb927.11.7490	497.353	242.127	330.533	194.622	130.734	226.933	245.558	253.93	265.018	190.581	123.755	186.52
Tb927.9.2020	38.6373	78.5278	16.5859	34.1582	51.5868	37.455	305.115	218.367	265.018	278.04	243.662	285.661
Tb11.v5.1034.1	258.952	407.908	267.744	424.197	385.841	442.85	228.149	196.531	262.672	252.586	237.25	324.31
Tb927.10.14820	340.337	460.26	403.985	207.332	375.947	400.254	329.854	260.169	262.672	319.811	224.426	196.602
Tb927.10.15760	219.493	290.117	280.775	181.118	178.08	210.776	278.543	217.744	262.672	267.597	262.898	275.579
Tb927.11.11820	82.2071	325.018	73.4518	117.568	190.8	80.7852	320.691	265.16	262.672	248.017	172.487	265.497
Tb927.11.10790	18.9076	137.424	15.4012	37.3357	77.7335	22.0323	361.923	336.286	262.672	308.716	257.128	307.506
Tb927.11.9860	248.265	279.21	210.878	189.856	245.92	163.039	237.312	217.744	260.327	229.089	235.967	166.356
Tb927.2.4710	95.3602	205.045	142.165	87.3815	132.854	61.6906	368.337	345.021	260.327	246.711	324.455	221.808
Tb927.11.14250	268.817	307.567	292.622	282.004	206.347	231.34	388.495	285.125	257.982	331.559	309.707	352.876
Tb927.3.3940	33.7049	56.7145	75.8212	60.3726	60.0668	101.349	119.114	137.26	257.982	106.386	157.739	320.949
Tb927.11.1450	214.56	259.578	174.152	104.858	108.827	90.3326	416.899	286.997	257.982	372.025	187.235	191.561
Tb927.9.3990	25.4842	135.242	9.47765	45.2795	49.4668	13.9538	260.218	262.665	257.982	203.635	182.747	193.242
Tb927.4.1100	29.5945	259.578	22.5094	30.9807	122.254	11.0162	320.691	253.93	257.982	206.246	186.594	164.675
Tb927.6.2790	229.358	285.754	165.859	140.605	168.187	144.679	231.814	319.44	255.637	254.544	210.96	201.643
Tb927.3.1010	344.448	274.847	419.386	548.914	375.947	536.855	185.085	139.755	253.291	201.677	244.303	253.735
Tb927.9.15170	89.6057	185.413	162.305	134.25	173.84	258.513	283.125	246.443	253.291	236.921	248.792	253.735
Tb927.5.1120	30.4166	26.1759	29.6177	57.9895	43.8134	124.116	183.252	195.283	253.291	385.731	565.552	628.455
Tb927.11.11475	27.1283	124.336	27.2482	39.7188	101.054	27.9076	336.268	269.528	253.291	229.742	193.006	283.981
Tb927.10.1080	82.2071	401.364	40.28	165.23	297.507	96.9423	399.49	300.723	250.946	366.151	296.242	325.99
Tb11.v5.0756.1	61.6553	58.8959	41.4647	66.7277	47.3468	41.127	109.035	103.569	250.946	78.9738	92.9763	220.127
Tb927.11.11680	194.831	191.957	171.782	145.371	137.8	148.351	334.435	284.502	248.601	366.151	263.54	245.333
Tb927.1.4310	140.574	104.704	188.368	88.1758	87.6268	119.709	146.602	119.166	248.601	77.6684	119.266	196.602
Tb11.v5.0493.1	6.57657	19.632	11.8471	24.6257	21.2	24.97	111.784	192.163	248.601	98.5541	231.479	273.899
Tb927.11.10160	32.0608	196.32	24.8788	100.886	89.0402	20.5635	236.395	222.111	248.601	215.383	176.334	151.232
Tb927.9.3920	29.5945	122.154	8.29294	51.6345	45.2268	12.485	240.977	217.12	248.601	176.222	175.052	151.232
Tb927.7.300	7.39864	6.54398	13.0318	3.17751	7.77335	6.6097	53.1431	54.2799	248.601	35.2445	48.0912	208.365
Tb927.11.5520	260.596	296.661	253.527	174.763	217.654	178.462	319.775	278.886	246.255	273.471	237.25	226.849
Tb927.10.520	195.653	91.6158	177.706	149.343	112.36	114.568	271.213	228.35	246.255	272.166	222.502	218.447
Tb927.8.7990	82.2071	67.6212	94.7765	109.624	81.9735	98.4111	222.651	184.676	246.255	268.25	215.449	283.981
Tb927.11.500	23.8401	102.522	37.9106	91.3533	98.2269	60.2217	209.824	267.032	246.255	197.108	251.357	320.949
Tb927.11.1900	200.585	303.205	235.757	209.715	291.147	190.947	534.18	381.207	243.91	419.018	383.447	270.538
Tb927.9.11410	19.7297	133.061	31.9871	42.102	81.9735	44.0647	267.548	223.983	243.91	190.581	167.357	240.292
Tb927.11.760	246.621	270.485	254.712	162.847	267.827	155.695	375.667	328.175	241.565	345.918	296.883	225.168
Tb927.10.7290	104.403	76.3465	223.909	66.7277	71.3735	144.679	141.104	105.44	241.565	136.409	129.526	149.552
Tb927.10.13040	60.8332	157.056	30.8024	24.6257	55.1201	22.0323	224.484	225.854	241.565	205.593	166.716	186.52
Tb927.11.9700	29.5945	85.0718	20.14	24.6257	53.7068	16.8915	281.292	243.324	241.565	214.73	191.082	126.027
Tb927.10.5370	13.9752	74.1652	10.6624	30.1863	53.7068	19.0947	175.006	132.268	239.219	110.302	117.984	126.027
Tb927.4.3590	135.642	438.447	226.279	173.174	387.254	268.795	251.055	189.668	236.874	241.49	198.777	211.725
Tb927.11.7510	122.489	373.007	33.1718	161.259	203.52	33.7829	349.095	329.423	236.874	373.983	369.34	267.177
Tb927.11.3000	24.6621	93.7971	14.2165	27.0088	77.7335	21.2979	172.257	168.455	236.874	127.272	131.449	159.634
Tb927.10.14000	135.642	213.77	254.712	159.67	163.947	229.871	309.696	268.28	234.529	420.323	266.105	283.981
Tb927.5.295b	40.2815	30.5386	23.6941	49.2514	22.6134	12.485	75.1334	77.3645	234.529	77.6684	65.404	241.972
Tb927.9.14370	23.018	102.522	11.8471	34.1582	63.6001	11.7506	267.548	223.359	234.529	199.719	196.212	169.716
Tb927.10.14840	332.117	471.167	392.138	190.65	356.161	399.52	341.765	266.408	232.184	291.746	201.342	188.2
Tb927.11.9980	352.668	453.716	210.878	316.956	282.667	196.822	464.544	294.484	232.184	586.103	317.402	205.004
Tb927.6.4900	107.691	45.8079	143.349	58.7839	57.9468	110.896	141.104	101.073	232.184	110.302	104.518	235.251
Tb927.8.900	90.4278	63.2585	97.1459	52.4289	49.4668	56.5497	227.233	172.822	232.184	149.463	119.266	126.027
Tb927.6.3740	148.795	349.012	77.0059	104.858	137.8	44.7991	364.672	305.091	232.184	297.62	189.8	122.666
Tb927.7.5170	21.3738	100.341	26.0635	34.9526	98.2269	26.4388	276.711	242.7	232.184	227.131	223.143	325.99
Tb927.10.7340	94.5381	157.056	7.10824	96.1196	154.054	23.5012	348.179	286.373	232.184	279.998	247.509	181.479
Tb927.7.1040	25.4842	87.2531	17.7706	47.6626	63.6001	13.2194	206.159	242.7	232.184	211.467	155.174	220.127
Tb927.11.13125	250.732	250.853	284.329	238.313	154.054	301.843	189.666	147.866	229.838	151.421	131.449	230.209
Tb927.3.1790	149.617	246.49	163.489	135.838	146.28	153.492	325.273	333.166	229.838	324.38	273.158	258.776
Tb927.11.2500	266.351	202.864	232.202	152.52	176.667	139.538	275.794	220.239	229.838	220.604	188.517	156.274
Tb927.11.1130	13.1531	15.2693	18.9553	167.614	89.7468	129.256	148.434	130.397	229.838	366.151	394.348	515.871
Tb927.6.4850	91.2498	54.5332	110.178	50.8401	43.8134	85.9261	141.104	90.4665	229.838	100.512	97.4648	247.013
Tb927.2.4230	49.3242	58.8959	75.8212	73.0827	69.9601	80.7852	173.173	182.181	229.838	222.562	268.028	221.808
Tb11.v5.0456.1	101.937	253.034	48.5729	126.306	202.814	72.7067	283.125	236.461	229.838	256.502	166.716	196.602
Tb927.8.4950	95.3602	74.1652	118.471	50.8401	46.6401	69.7691	225.4	185.3	229.838	154.032	165.434	154.593
Tb927.7.5020	74.8084	183.232	60.42	86.5871	134.974	63.1594	223.568	205.889	229.838	197.108	185.953	161.315
Tb927.6.3750	123.311	397.002	79.3753	104.063	127.2	50.6744	421.48	388.694	229.838	370.067	249.433	139.47
Tb927.4.2040	136.464	263.941	143.349	57.1951	81.9735	49.2056	228.149	176.566	229.838	142.283	159.022	201.643
Tb927.7.6850	212.916	259.578	81.7447	60.3726	77.0268	30.1109	334.435	297.604	229.838	212.12	160.304	134.429
Tb927.10.14580	36.9932	176.688	14.2165	51.6345	143.454	16.157	348.179	252.682	229.838	277.387	202.624	220.127
Tb927.10.5330	9.86485	74.1652	4.73882	27.0088	28.2667	9.54735	261.134	217.12	229.838	177.528	164.792	186.52
Tb927.8.5600	248.265	148.33	126.764	205.744	110.947	129.991	155.764	172.822	227.493	135.104	117.984	114.265
Tb927.10.14790	86.3174	231.221	61.6047	137.427	193.627	85.1917	273.046	221.487	227.493	302.842	287.906	278.94
Tb927.11.5190	69.0539	26.1759	85.2988	40.5132	38.8667	77.1132	155.764	144.123	227.493	146.199	116.701	146.191
Tb927.11.13030	332.939	268.303	279.591	236.724	232.494	182.868	212.573	199.026	225.148	182.097	185.953	179.799
Tb927.8.1550	167.702	122.154	285.514	102.475	78.4401	124.116	234.563	181.557	225.148	162.516	223.784	241.972
Tb927.11.6570	64.9436	82.8905	55.6812	54.812	67.1335	72.7067	265.716	199.026	225.148	291.093	239.815	327.67
Tb927.10.5610	18.9076	119.973	14.2165	30.9807	69.9601	17.6259	261.134	204.641	225.148	238.227	141.067	225.168
Tb927.7.710	237.578	309.749	196.661	216.865	248.747	188.744	361.923	267.032	222.802	334.823	300.089	208.365
Tb927.8.5000	166.88	139.605	268.928	160.464	133.56	175.524	175.006	132.268	222.802	146.199	185.953	213.406
Tb927.11.1020	207.162	242.127	221.54	132.661	120.134	121.912	280.376	283.254	222.802	166.432	201.342	181.479
Tb927.7.960	83.0291	87.2531	146.904	57.9895	45.2268	101.349	114.533	138.507	222.802	166.432	146.197	226.849
Tb927.11.7500	139.752	154.874	123.209	46.0739	77.0268	76.3788	159.429	193.411	222.802	138.367	91.6939	191.561
Tb927.9.14000	31.2387	100.341	14.2165	33.3638	63.6001	20.5635	183.252	187.796	222.802	170.348	157.098	247.013
Tb927.9.5100	68.2319	34.9012	152.827	41.3076	47.3468	129.991	234.563	175.318	220.457	191.234	121.831	193.242
Tb927.6.4880	99.4706	52.3519	148.088	51.6345	54.4134	105.021	143.853	94.21	220.457	125.966	104.518	250.374
Tb927.8.5110	38.6373	32.7199	61.6047	54.812	56.5334	105.021	175.922	135.388	220.457	179.486	191.724	252.054
Tb927.11.2430	21.3738	32.7199	33.1718	47.6626	48.7601	100.614	132.858	167.831	220.457	174.264	201.342	243.652
Tb11.v5.0537.1	140.574	93.7971	81.7447	162.847	164.654	83.7229	183.252	167.831	220.457	171.001	146.838	142.831
Tb927.9.11380	19.7297	124.336	41.4647	36.5413	82.6802	46.2679	262.967	238.332	220.457	219.299	146.197	203.324
Tb927.7.240	27.1283	163.6	16.5859	45.2795	72.7868	28.642	186.917	179.061	220.457	144.241	164.792	257.095
Tb927.11.13040	308.277	331.562	281.96	258.172	223.307	215.917	207.075	177.813	218.112	187.971	189.8	186.52
Tb11.v5.0349.1	15.6193	13.088	33.1718	17.4763	15.5467	24.2356	123.695	137.26	218.112	88.7639	98.7472	151.232
Tb927.4.310	23.018	8.72531	43.8341	21.4482	10.6	21.2979	211.656	230.222	218.112	174.264	160.304	176.438
Tb927.8.6750	226.069	482.073	338.826	184.295	411.987	420.818	278.543	228.974	215.767	291.093	228.273	221.808
Tb927.11.13140	271.283	215.951	304.469	190.65	148.4	268.06	193.331	146.618	215.767	149.463	141.067	208.365
Tb927.11.780	53.4346	52.3519	52.1271	134.25	99.6402	209.307	221.735	192.787	215.767	305.452	215.449	226.849
Tb927.7.5210	92.894	74.1652	145.719	139.81	149.814	174.055	193.331	138.507	215.767	205.593	159.663	188.2
Tb11.v5.1063.1	117.556	277.029	149.273	150.137	206.347	145.413	286.79	260.169	215.767	319.158	273.158	290.702
Tb927.11.15370	93.7161	167.962	135.056	109.624	160.414	112.365	397.657	257.674	215.767	374.636	271.876	252.054
Tb927.6.4890	88.7836	63.2585	126.764	42.102	50.1734	110.896	152.099	95.4578	215.767	113.566	105.159	255.415
Tb927.1.2260	96.1823	102.522	131.502	164.436	98.2269	80.7852	209.824	162.84	215.767	101.817	94.2587	193.242
Tb927.7.3560	60.0112	45.8079	116.101	52.4289	44.5201	69.7691	160.346	127.277	215.767	132.493	146.838	178.118
Tb927.11.6300	88.7836	229.039	33.1718	112.007	195.747	49.94	277.627	224.607	215.767	219.952	146.197	157.954
Tb927.7.230	32.0608	133.061	17.7706	58.7839	69.2535	26.4388	189.666	188.42	215.767	150.768	156.457	225.168
Tb11.v5.0627.1	18.9076	32.7199	27.2482	20.6538	26.1467	19.8291	71.4683	86.7231	215.767	112.913	103.877	245.333
Tb927.7.1320	317.319	292.298	107.808	233.547	171.72	102.818	225.4	232.093	213.421	227.131	171.205	181.479
Tb11.v5.0182.1	64.9436	178.869	72.2671	100.886	156.88	57.2841	212.573	190.916	213.421	182.097	189.8	198.283
Tb11.v5.0479.1	27.9504	124.336	33.1718	59.5783	115.894	34.5173	367.421	249.563	213.421	334.823	194.93	220.127
Tb927.11.9730	12.3311	52.3519	13.0318	25.4201	21.9067	8.81294	210.74	165.335	213.421	152.073	137.861	132.749
Tb927.7.310	3.28828	6.54398	3.55412	12.71	12.0134	8.07852	32.9854	14.9738	213.421	22.8437	28.8547	186.52
Tb927.1.4100	104.403	128.698	151.642	212.893	190.8	205.635	159.429	150.362	211.076	256.502	244.303	379.762
Tb927.8.5640	105.225	95.9784	167.044	75.4658	103.174	137.335	130.109	130.397	211.076	138.367	125.678	137.79
Tb927.11.13190	144.684	390.458	135.056	106.447	202.814	99.1455	293.203	241.452	211.076	204.94	191.082	151.232
Tb927.5.810	16.4414	15.2693	17.7706	30.9807	33.9201	38.9238	157.597	179.061	211.076	206.246	237.25	337.753
Tb927.3.4360	24.6621	150.512	28.4329	31.7751	101.054	18.3603	183.252	196.531	211.076	124.661	117.984	174.758
Tb11.v5.1051.1	97.8264	4.36266	58.0506	11.1213	8.48002	13.9538	100.789	63.0146	211.076	71.7943	78.8695	156.274
Tb927.10.14830	340.337	530.063	403.985	231.164	378.774	373.815	356.425	278.886	208.731	340.697	212.884	199.963
Tb927.10.11970	184.144	150.512	195.477	50.0457	55.1201	122.647	161.262	161.592	208.731	117.482	101.312	171.397
Tb927.11.13090	125.777	333.743	143.349	85.7927	180.2	111.631	313.361	262.041	208.731	229.742	213.525	142.831
Tb11.v5.0489.1	60.8332	41.4452	81.7447	36.5413	55.8268	42.5959	138.355	82.3557	208.731	69.1836	94.2587	132.749
Tb11.v5.0680.1	14.7973	6.54398	17.7706	9.53252	10.6	13.9538	50.3943	53.656	208.731	48.9507	54.5033	149.552
Tb927.10.10210	5.75449	30.5386	4.73882	34.1582	55.8268	8.81294	32.9854	34.9388	208.731	100.512	189.8	309.186
Tb927.8.4970	178.389	167.962	265.374	142.193	169.6	190.947	151.183	121.662	206.385	157.295	185.953	220.127
Tb927.8.4980	159.482	137.424	213.247	136.633	136.387	182.868	177.755	126.653	206.385	157.948	149.403	235.251
Tb927.11.10560	81.385	130.88	100.7	65.1389	144.867	130.725	228.149	197.779	206.385	212.772	209.036	196.602
Tb927.9.13990	61.6553	87.2531	79.3753	84.2039	84.0935	84.4573	218.07	267.032	206.385	207.551	221.219	267.177
Tb927.9.6460	31.2387	50.1705	54.4965	62.7558	51.5868	58.0185	112.7	126.029	206.385	150.768	211.601	178.118
Tb11.v5.0655.1	63.2994	67.6212	39.0953	53.2233	54.4134	41.8614	146.602	121.038	206.385	131.188	125.037	191.561
Tb11.0330	8.22071	52.3519	10.6624	12.71	28.9734	11.7506	240.977	223.359	206.385	176.875	182.105	191.561
Tb927.11.13007	245.799	431.903	277.221	441.674	729.988	345.173	133.774	137.883	204.04	101.165	100.671	137.79
Tb927.11.16760	229.358	425.359	210.878	247.051	304.574	225.464	353.677	263.289	204.04	338.739	260.975	235.251
Tb927.6.4910	101.937	47.9892	130.318	57.1951	68.5468	112.365	164.011	92.9621	204.04	102.47	105.159	228.529
Tb927.8.8300	145.507	113.429	119.655	31.7751	52.2934	93.2702	321.608	175.942	204.04	197.108	91.0527	142.831
Tb927.10.12890	142.218	152.693	187.184	57.1951	95.4002	87.3949	221.735	175.318	204.04	138.367	126.32	189.881
Tb927.11.2860	55.0787	28.3573	123.209	28.5976	51.5868	60.2217	96.2074	91.7143	204.04	120.092	125.678	213.406
Tb927.5.1830	124.955	161.418	60.42	77.0546	72.7868	27.1732	260.218	248.315	204.04	197.108	150.045	131.068
Tb927.11.11230	32.0608	87.2531	9.47765	40.5132	38.1601	10.2818	219.903	206.513	204.04	134.451	173.128	295.744
Tb927.3.4270	199.763	187.594	330.533	91.3533	98.2269	187.275	152.099	121.662	201.695	81.5845	93.6175	169.716
Tb927.3.5520	147.151	141.786	183.629	153.315	144.16	180.665	264.799	187.172	201.695	239.532	196.853	188.2
Tb11.v5.0732.1	207.162	213.77	163.489	115.979	180.907	152.023	228.149	212.128	201.695	229.089	220.578	198.283
Tb927.8.6660	138.93	172.325	196.661	128.689	101.054	129.256	151.183	109.184	201.695	148.157	139.144	188.2
Tb927.8.2540	142.218	220.314	136.241	141.399	171.014	119.709	183.252	195.283	201.695	186.013	152.609	156.274
Tb927.6.2170	47.6801	194.138	49.7577	56.4008	146.987	80.0508	290.455	222.735	201.695	269.555	219.296	194.922
Tb927.8.6650	75.6305	74.1652	99.5153	37.3357	37.4534	55.0808	108.119	119.166	201.695	99.2067	98.7472	132.749
Tb927.2.4050	61.6553	67.6212	66.3435	76.2602	49.4668	55.0808	155.764	150.985	201.695	153.379	194.93	198.283
Tb927.6.3800	169.347	357.738	75.8212	127.895	126.494	45.5335	375.667	308.21	201.695	326.991	211.601	99.1413
Tb927.10.3970	21.3738	19.632	20.14	22.2426	28.9734	38.9238	160.346	189.044	201.695	191.887	269.311	309.186
Tb927.11.13050	309.921	327.199	294.992	234.341	195.747	181.4	233.646	218.367	199.35	199.719	196.853	210.045
Tb11.v5.0671.1	117.556	222.495	178.891	137.427	153.347	160.836	228.149	200.274	199.35	201.024	188.517	233.57
Tb927.3.3130	70.6981	139.605	127.948	104.858	146.28	144.679	207.991	187.796	199.35	255.196	228.273	198.283
Tb927.1.600	27.9504	95.9784	48.5729	84.9983	114.48	71.2379	183.252	270.776	199.35	214.078	228.273	228.529
Tb927.6.3500	39.4594	34.9012	66.3435	31.7751	24.7334	36.7206	172.257	150.985	199.35	134.451	107.083	126.027
Tb927.7.2370	80.5629	146.149	42.6494	57.9895	55.8268	30.1109	201.577	192.163	199.35	107.692	106.442	176.438
Tb927.7.7400	13.9752	21.8133	21.3247	33.3638	40.2801	24.97	112.7	127.277	199.35	141.631	253.28	174.758
Tb927.6.3840	71.5202	76.3465	41.4647	27.8032	46.6401	17.6259	218.986	254.554	199.35	186.665	150.045	139.47
Tb927.11.15840	41.9256	41.4452	5.92353	19.8594	39.5734	12.485	218.986	215.872	199.35	164.474	142.991	194.922
Tb927.10.5360	15.6193	113.429	8.29294	23.8313	48.7601	12.485	187.833	130.397	199.35	135.757	116.06	154.593
Tb927.10.1060	189.076	218.133	176.521	217.659	221.894	224.73	280.376	190.916	197.004	313.284	268.028	223.488
Tb927.6.950	132.353	124.336	158.751	184.295	153.347	163.774	192.415	177.813	197.004	195.803	206.472	184.84
Tb927.5.2080	268.817	163.6	266.559	136.633	107.414	143.21	250.139	150.985	197.004	186.013	157.739	196.602
Tb927.11.510	21.3738	80.7091	40.28	34.9526	61.4801	49.94	98.9562	130.397	197.004	126.619	125.037	203.324
Tb927.7.5940	103.581	246.49	43.8341	33.3638	45.2268	17.6259	321.608	381.831	197.004	180.139	159.022	166.356
Tb927.10.10200	23.8401	30.5386	14.2165	17.4763	12.72	14.6882	39.3992	23.7085	197.004	47.6453	46.1675	252.054
Tb927.6.1020	50.1463	139.605	13.0318	34.9526	61.4801	13.9538	281.292	293.86	197.004	296.315	220.578	183.159
Tb927.11.11290	332.939	253.034	335.272	394.011	348.387	334.892	217.154	154.105	194.659	209.509	217.372	332.711
Tb927.11.11520	325.54	211.589	323.425	197.005	183.734	207.104	231.814	162.216	194.659	192.539	154.533	194.922
Tb927.6.4870	89.6057	67.6212	148.088	55.6064	59.3601	115.303	135.607	87.347	194.659	107.039	105.801	218.447
Tb927.11.14330	77.2746	61.0772	105.439	69.9052	46.6401	101.349	133.774	137.883	194.659	158.6	145.556	154.593
Tb927.2.100	73.1643	87.2531	63.9741	75.4658	81.2668	80.7852	175.922	159.72	194.659	130.535	140.426	161.315
Tb927.11.14920	14.7973	21.8133	8.29294	51.6345	21.2	18.3603	153.932	170.951	194.659	204.288	186.594	205.004
Tb927.11.15860	41.1035	19.632	5.92353	23.8313	36.0401	9.54735	193.331	165.959	194.659	144.894	135.297	194.922
Tb11.v5.1060.1	17.2635	67.6212	5.92353	18.2707	31.8001	7.34411	221.735	175.942	194.659	157.295	150.686	168.036
Tb11.v5.0815.1	2.46621	6.54398	1.18471	3.17751	4.94668	6.6097	27.4878	5.61516	194.659	12.4008	10.9007	94.1002
Tb927.11.13003	223.603	412.271	304.469	481.392	650.135	397.317	159.429	169.079	192.314	90.7219	112.854	114.265
Tb927.4.3570	125.777	418.815	229.833	154.109	405.627	287.155	235.479	197.155	192.314	257.154	195.571	184.84
Tb927.8.2640	178.389	154.874	174.152	215.276	202.107	218.12	173.173	144.123	192.314	184.055	182.747	174.758
Tb11.v5.0669.1	207.984	224.677	284.329	187.473	167.48	211.51	250.139	222.111	192.314	250.628	223.784	272.218
Tb927.11.2650	190.72	170.144	138.611	239.902	173.134	177.728	275.794	207.761	192.314	306.105	235.326	247.013
Tb927.3.4290	164.414	148.33	242.865	173.969	144.867	175.524	179.587	111.679	192.314	156.642	193.647	189.881
Tb927.3.4310	179.211	137.424	252.342	185.09	140.627	172.587	163.094	110.432	192.314	144.894	186.594	213.406
Tb927.3.3460	95.3602	71.9838	161.12	113.596	91.8668	135.866	215.321	178.437	192.314	184.055	148.121	188.2
Tb927.2.4370	125.777	137.424	172.967	73.877	101.054	128.522	209.824	177.19	192.314	140.325	121.831	174.758
Tb927.5.1780	226.892	119.973	297.361	77.0546	79.1468	121.912	128.277	108.56	192.314	96.596	68.6101	173.077
Tb927.8.7980	190.72	266.122	75.8212	173.174	171.72	53.612	470.042	393.685	192.314	418.365	304.578	142.831
Tb11.v5.0693.1	36.9932	43.6266	37.9106	49.2514	33.9201	42.5959	97.1236	86.7231	192.314	73.0997	72.4574	162.995
Tb927.4.4380	121.666	257.397	29.6177	124.717	152.64	30.8453	476.456	465.435	192.314	422.934	340.486	157.954
Tb11.v5.0243.1	10.6869	78.5278	13.0318	15.0932	29.6801	6.6097	223.568	218.991	192.314	208.856	164.151	168.036
Tb927.11.20430	0.822071	2.18133	0	0.794377	0	0	11.9114	4.99126	192.314	9.13746	8.33581	183.159
Tb927.10.16200	0	2.18133	0	0.794377	0	0	17.409	4.99126	192.314	11.0955	2.56486	184.84
Tb927.11.7840	186.61	211.589	163.489	198.594	193.627	224.73	251.055	160.344	189.968	259.765	208.395	213.406
Tb11.v5.0762.1	54.2567	61.0772	47.3882	69.1108	62.1868	92.5358	91.6261	91.0904	189.968	99.2067	98.106	171.397
Tb927.3.1840	158.66	277.029	105.439	152.52	182.32	82.9885	190.582	252.682	189.968	255.196	237.891	171.397
Tb927.8.7950	52.6125	45.8079	73.4518	44.4851	45.2268	54.3464	159.429	134.764	189.968	130.535	122.472	168.036
Tb927.11.7630.1	2.46621	2.18133	4.73882	8.73815	3.53334	0.734411	28.4041	23.7085	189.968	18.2749	30.1371	137.79
Tb927.10.9570	200.585	146.149	244.049	195.417	171.014	238.684	242.809	197.155	187.623	214.73	214.166	199.963
Tb927.10.3990	203.051	198.501	246.419	111.213	125.08	159.367	178.671	190.916	187.623	140.978	116.06	136.109
Tb927.10.5350	42.7477	45.8079	48.5729	68.3164	51.5868	61.6906	160.346	136.636	187.623	185.36	185.311	208.365
Tb927.6.5130	29.5945	139.605	5.92353	31.7751	60.0668	16.8915	164.927	160.968	187.623	124.008	123.113	166.356
Tb927.11.7640.1	0	0	0	1.58875	2.82667	1.46882	23.8228	19.3411	187.623	23.4963	28.8547	176.438
Tb11.v5.0360.1	236.756	143.968	319.871	146.165	117.307	178.462	202.494	150.362	185.278	197.761	134.014	196.602
Tb927.10.8320	109.335	141.786	150.458	96.1196	96.8135	129.256	109.951	97.9534	185.278	93.3326	94.2587	247.013
Tb11.v5.0713.1	115.912	128.698	172.967	146.96	142.747	126.319	290.455	200.898	185.278	171.654	210.96	122.666
Tb11.v5.0593.1	61.6553	76.3465	79.3753	91.3533	85.5068	87.3949	175.922	204.641	185.278	231.047	230.196	253.735
Tb927.4.2410	41.9256	15.2693	61.6047	57.1951	40.9867	49.94	128.277	110.432	185.278	179.486	145.556	174.758
Tb927.3.5310	22.1959	23.9946	46.2035	7.94377	18.3734	35.2517	139.272	146.618	185.278	127.924	136.579	134.429
Tb927.6.240	0	0	0	0	0	0	9.16261	6.23907	185.278	7.83211	7.69459	131.068
Tb927.7.6090	177.567	235.583	171.782	261.35	240.267	191.681	249.223	218.367	182.933	261.07	266.746	238.611
Tb927.3.4300	148.795	148.33	249.973	182.707	139.92	176.993	167.676	100.449	182.933	133.146	210.319	181.479
Tb927.10.6050	129.065	98.1598	171.782	154.903	139.214	155.695	194.247	154.105	182.933	261.723	200.059	169.716
Tb927.9.4680	105.225	359.919	126.764	139.81	229.667	149.085	286.79	248.315	182.933	240.185	207.754	201.643
Tb927.11.880	233.468	586.777	99.5153	253.406	332.841	146.882	172.257	169.703	182.933	195.15	212.884	278.94
Tb927.6.4860	83.8512	52.3519	125.579	61.167	45.2268	105.021	115.449	65.5102	182.933	87.4586	93.6175	174.758
Tb927.11.3620	170.169	32.7199	113.732	23.8313	32.5067	91.067	57.7244	45.5452	182.933	37.2025	32.702	142.831
Tb11.v5.0783.1	82.2071	137.424	66.3435	91.3533	149.814	84.4573	216.238	207.761	182.933	214.078	198.777	203.324
Tb927.8.1840	37.8153	34.9012	60.42	68.3164	52.2934	77.8476	160.346	149.114	182.933	172.306	167.357	188.2
Tb927.1.220	45.2139	34.9012	45.0188	45.2795	41.6934	67.5658	168.592	137.883	182.933	149.463	142.35	154.593
Tb927.10.12680	44.3918	71.9838	21.3247	47.6626	38.8667	24.97	125.528	139.131	182.933	80.9318	97.4648	114.265
Tb11.v5.0476.1	2.46621	2.18133	1.18471	0.794377	0.706668	0	23.8228	11.8542	182.933	16.3169	7.05337	119.306
Tb11.v5.1055.1	175.923	161.418	216.801	165.23	150.52	168.18	161.262	91.7143	180.587	129.23	201.983	220.127
Tb927.10.12840	139.752	141.786	174.152	85.7927	99.6402	144.679	355.509	328.175	180.587	294.357	239.815	173.077
Tb927.10.10900	83.8512	189.776	73.4518	177.146	166.067	142.476	152.099	132.268	180.587	186.013	178.899	236.931
Tb11.v5.0556.1	138.93	111.248	174.152	123.923	119.427	120.443	181.42	182.805	180.587	174.264	175.693	186.52
Tb927.1.710	141.396	128.698	133.872	58.7839	64.3068	117.506	136.523	134.764	180.587	133.146	101.312	161.315
Tb11.v5.1043.1	170.991	34.9012	142.165	18.2707	25.44	105.755	64.1383	48.0408	180.587	45.6873	32.702	168.036
Tb927.10.560	50.9684	248.671	72.2671	102.475	229.667	78.582	184.168	172.198	180.587	178.833	144.274	236.931
Tb927.9.15460	132.353	122.154	84.1141	85.7927	80.5602	47.7367	199.745	205.265	180.587	140.325	164.151	181.479
Tb927.9.13200	72.3422	74.1652	88.853	22.2426	20.4934	43.3303	117.281	94.21	180.587	69.1836	57.0682	124.347
Tb927.11.3390	18.0856	19.632	23.6941	38.9245	35.3334	30.8453	105.37	135.388	180.587	140.978	177.617	176.438
Tb927.9.14480	134.82	154.874	225.094	154.109	187.267	267.326	93.4586	101.697	178.242	107.039	76.3047	97.4609
Tb927.3.4320	178.389	143.968	214.432	180.324	140.627	190.213	154.848	83.6035	178.242	128.577	198.777	230.209
Tb927.9.12590	148.795	200.682	195.477	145.371	162.534	184.337	198.829	198.402	178.242	192.539	150.686	92.4199
Tb927.8.7120	118.378	82.8905	167.044	112.007	97.5202	146.148	187.833	167.831	178.242	208.856	190.441	194.922
Tb927.3.4330	152.083	130.88	187.184	126.306	115.894	118.975	131.942	111.679	178.242	131.188	164.792	178.118
Tb927.2.4810	46.858	50.1705	74.6365	71.4939	53.0001	82.2541	132.858	99.8251	178.242	157.295	171.205	238.611
Tb927.9.13360	35.349	28.3573	61.6047	70.6995	44.5201	75.6444	74.2171	112.927	178.242	134.451	150.686	213.406
Tb11.v5.0566.1	55.0787	28.3573	94.7765	55.6064	36.0401	58.0185	147.518	145.37	178.242	130.535	117.984	134.429
Tb927.7.5000	27.9504	200.682	24.8788	61.9614	130.734	31.5797	252.888	181.557	178.242	191.887	182.747	168.036
Tb927.8.4990	166.058	163.6	247.604	139.81	145.574	194.619	153.932	110.432	175.897	142.936	155.174	183.159
Tb927.10.10950	100.293	194.138	47.3882	162.847	140.627	137.335	163.094	110.432	175.897	160.558	181.464	216.767
Tb927.6.4480	123.311	165.781	126.764	162.053	148.4	127.053	232.73	172.822	175.897	241.49	176.334	210.045
Tb927.11.6170	147.973	111.248	120.84	116.773	103.88	121.912	220.819	144.746	175.897	199.066	142.35	139.47
Tb927.10.10910	78.0967	157.056	85.2988	177.146	173.134	118.24	133.774	112.927	175.897	166.432	169.281	230.209
Tb11.v5.0577.1	102.759	146.149	68.713	108.83	137.094	69.7691	142.02	185.3	175.897	127.272	182.105	147.872
Tb927.7.2340	69.876	111.248	50.9424	39.7188	50.8801	33.0485	225.4	198.402	175.897	146.199	131.449	221.808
Tb927.5.1810	143.04	157.056	63.9741	71.4939	84.0935	30.8453	265.716	247.067	175.897	206.898	151.327	84.0181
Tb927.7.5340	109.335	113.429	234.572	288.359	272.774	313.594	107.203	93.586	173.551	178.181	259.051	225.168
Tb927.5.930	305.81	290.117	290.253	272.471	187.974	234.277	168.592	163.464	173.551	161.864	148.121	216.767
Tb927.8.5010	159.482	141.786	244.049	145.371	157.587	188.744	154.848	119.166	173.551	139.02	141.067	191.561
Tb927.11.12850	152.905	172.325	136.241	163.642	142.747	139.538	207.991	174.07	173.551	241.49	211.601	174.758
Tb927.7.4900	65.7657	58.8959	105.439	102.475	79.8535	121.178	151.183	149.738	173.551	185.36	175.052	245.333
Tb927.9.1770	67.4098	43.6266	85.2988	83.4096	63.6001	82.9885	155.764	132.892	173.551	197.108	150.686	260.456
Tb927.1.180	49.3242	43.6266	43.8341	46.0739	34.6267	71.9723	165.843	119.166	173.551	131.188	125.678	162.995
Tb927.5.1570	137.286	13.088	142.165	45.2795	24.7334	70.5035	91.6261	64.2624	173.551	41.1186	86.5641	173.077
Tb927.10.9880	51.7905	274.847	42.6494	64.3445	150.52	65.3626	178.671	153.481	173.551	167.738	120.549	162.995
Tb927.7.6590	7.39864	8.72531	14.2165	0.794377	7.77335	10.2818	76.0496	118.542	173.551	22.191	71.175	151.232
Tb927.11.13500	225.247	150.512	342.38	214.482	248.747	279.811	184.168	159.72	171.206	221.91	191.082	206.684
Tb927.9.8850	228.536	183.232	204.954	224.014	156.88	199.025	215.321	136.012	171.206	171.001	123.113	169.716
Tb927.9.12570	189.898	285.754	196.661	185.09	206.347	196.822	203.41	255.802	171.206	218.646	210.96	137.79
Tb927.9.12630	164.414	220.314	177.706	161.259	165.36	182.134	174.09	200.898	171.206	171.654	169.922	122.666
Tb11.v5.0741.1	166.058	207.226	155.196	169.997	133.56	123.381	143.853	146.618	171.206	127.924	128.884	124.347
Tb927.9.5770	152.905	196.32	161.12	117.568	137.094	118.24	204.326	212.752	171.206	173.612	150.045	104.182
Tb927.5.3620	73.9864	34.9012	95.9612	88.9702	55.1201	115.303	142.937	126.029	171.206	161.864	180.823	218.447
Tb927.5.1710	202.229	237.765	201.4	96.1196	134.267	109.427	197.912	157.225	171.206	152.073	101.953	119.306
Tb927.11.14190	58.367	71.9838	33.1718	99.2971	108.12	107.224	157.597	135.388	171.206	182.749	174.411	216.767
Tb927.11.1710	92.894	150.512	100.7	55.6064	95.4002	93.2702	186.001	144.123	171.206	140.978	142.991	151.232
Tb927.1.3950	99.4706	104.704	95.9612	100.886	96.8135	85.1917	126.444	136.636	171.206	167.738	166.075	184.84
Tb927.7.3970	26.3063	19.632	33.1718	73.877	72.0801	73.4411	90.7098	101.697	171.206	118.787	140.426	206.684
Tb927.10.15350	18.0856	13.088	33.1718	15.8875	19.08	27.1732	110.868	94.21	171.206	69.8363	57.7094	149.552
Tb927.2.5910	11.509	67.6212	17.7706	10.3269	26.8534	8.07852	138.355	111.679	171.206	91.3746	71.175	104.182
Tb927.11.1480	82.2071	157.056	37.9106	10.3269	21.2	5.14088	194.247	220.239	171.206	54.1721	67.9689	94.1002
Tb927.9.7830	255.664	202.864	439.526	174.763	186.56	356.189	155.764	148.49	168.861	125.966	130.167	147.872
Tb927.11.5440	264.707	222.495	244.049	175.557	174.547	233.543	139.272	179.685	168.861	137.062	116.701	89.0591
Tb11.v5.1052.1	240.867	45.8079	380.291	38.9245	51.5868	219.589	48.5618	39.3061	168.861	27.4124	57.0682	105.863
Tb927.11.15020	157.016	80.7091	194.292	117.568	139.92	165.243	156.681	133.516	168.861	144.241	119.907	141.15
Tb927.6.640	52.6125	50.1705	66.3435	80.2321	60.0668	148.351	166.759	176.566	168.861	196.455	207.754	280.62
Tb927.7.3740	51.7905	71.9838	132.687	82.6152	79.1468	138.804	111.784	110.432	168.861	114.871	156.457	189.881
Tb927.5.1660	79.7409	109.066	124.394	84.9983	89.0402	118.975	160.346	112.303	168.861	135.104	127.602	166.356
Tb927.6.1770	69.0539	43.6266	90.0377	42.8964	36.7467	90.3326	177.755	155.977	168.861	132.493	125.678	134.429
Tb927.9.11110	19.7297	58.8959	36.7259	36.5413	36.0401	47.0023	139.272	174.694	168.861	187.971	176.334	147.872
Tb927.6.4000	86.3174	65.4398	54.4965	42.102	43.8134	39.6582	153.016	135.388	168.861	88.1112	73.0986	94.1002
Tb927.2.510	17.2635	15.2693	20.14	13.5044	10.6	7.34411	67.8033	36.1866	168.861	31.3284	33.3432	97.4609
Tb927.10.5460	258.13	325.018	479.806	247.846	585.828	612.499	156.681	142.251	166.516	117.482	96.1824	154.593
Tb927.11.6870	263.885	150.512	216.801	217.659	165.36	268.06	109.951	132.892	166.516	155.99	137.22	152.913
Tb927.11.14300	298.412	106.885	158.751	273.266	139.214	235.746	149.351	113.551	166.516	148.81	127.602	169.716
Tb927.8.2030	143.04	130.88	201.4	199.389	177.374	218.855	156.681	125.405	166.516	163.822	168.64	231.89
Tb927.6.2740	181.678	194.138	229.833	158.875	190.8	201.963	208.907	247.067	166.516	183.402	180.182	122.666
Tb927.10.3210	275.394	497.343	162.305	185.09	201.4	144.679	307.864	222.735	166.516	323.075	146.197	176.438
Tb927.10.10890	97.8264	185.413	75.8212	189.062	148.4	124.116	150.267	122.91	166.516	183.402	208.395	240.292
Tb927.7.4070	164.414	167.962	60.42	126.306	110.24	68.3003	207.075	195.283	166.516	223.868	166.716	178.118
Tb927.10.13000	31.2387	65.4398	85.2988	34.1582	50.8801	68.3003	131.942	112.927	166.516	106.386	109.648	142.831
Tb927.8.6036	8.22071	54.5332	9.47765	15.0932	31.0934	11.0162	134.69	171.574	166.516	139.673	126.961	141.15
Tb927.3.860	230.18	159.237	86.4835	170.791	132.147	114.568	198.829	179.685	164.17	193.845	181.464	171.397
Tb927.11.12530	137.286	61.0772	122.025	105.652	53.7068	112.365	123.695	97.9534	164.17	118.134	132.09	131.068
Tb927.3.3580	198.119	200.682	94.7765	298.686	198.574	110.162	238.228	235.837	164.17	308.063	242.38	174.758
Tb927.6.4840	93.7161	56.7145	131.502	52.4289	52.2934	107.224	110.868	69.8776	164.17	98.5541	85.2817	189.881
Tb927.11.16730	113.446	213.77	80.56	125.512	143.454	74.1755	189.666	199.026	164.17	238.879	191.724	171.397
Tb927.6.4440	45.2139	104.704	59.2353	36.5413	77.0268	38.1894	207.991	148.49	164.17	137.062	129.526	77.2966
Tb927.8.2370	21.3738	6.54398	27.2482	31.7751	23.32	38.1894	83.3797	91.0904	164.17	111.608	144.274	181.479
Tb927.11.6350	21.3738	37.0826	37.9106	30.1863	36.0401	37.455	164.927	123.534	164.17	140.978	137.22	243.652
Tb11.v5.0624.1	20.5518	30.5386	33.1718	22.2426	29.6801	25.7044	103.537	59.8951	164.17	65.2676	66.6864	146.191
Tb927.1.580	25.4842	93.7971	26.0635	35.747	77.0268	19.0947	149.351	213.376	164.17	175.57	164.792	179.799
Tb11.v5.0472.1	8.22071	17.4506	10.6624	16.6819	12.72	18.3603	74.2171	112.303	164.17	82.2372	101.953	117.625
Tb927.8.6038	12.3311	8.72531	14.2165	17.4763	7.06668	17.6259	134.69	144.123	164.17	105.733	123.755	325.99
Tb927.7.5930	56.7229	157.056	24.8788	12.71	31.0934	15.4226	147.518	196.531	164.17	124.008	88.4878	90.7395
Tb927.9.12550	199.763	314.111	209.693	201.772	183.027	221.058	196.996	227.102	161.825	191.234	189.159	168.036
Tb927.11.6430	140.574	119.973	146.904	163.642	179.494	203.432	169.508	130.397	161.825	181.444	218.013	252.054
Tb927.10.8190	211.272	294.479	185.999	220.837	224.014	192.416	347.263	257.05	161.825	288.483	273.158	218.447
Tb927.9.15290	60.8332	65.4398	87.6683	57.1951	59.3601	129.256	93.4586	90.4665	161.825	83.5425	116.701	225.168
Tb927.9.11600	212.916	187.594	95.9612	145.371	157.587	106.49	164.011	260.169	161.825	139.673	184.029	176.438
Tb927.11.11690	78.0967	119.973	73.4518	90.559	65.0135	78.582	175.006	149.114	161.825	161.211	166.075	189.881
Tb927.7.3160	22.1959	17.4506	28.4329	31.7751	21.9067	38.1894	142.02	125.405	161.825	171.001	198.136	238.611
Tb927.10.2880	60.0112	85.0718	22.5094	62.7558	58.6534	36.7206	225.4	199.026	161.825	251.28	241.738	152.913
Tb927.2.3800	36.9932	37.0826	58.0506	34.1582	31.0934	33.7829	153.016	154.105	161.825	125.314	125.037	92.4199
Tb927.9.5730	183.322	253.034	195.477	193.034	300.334	299.64	274.878	233.341	159.48	280.651	294.318	257.095
Tb927.6.690	23.018	13.088	48.5729	47.6626	36.0401	110.896	104.454	95.4578	159.48	155.337	141.709	235.251
Tb927.7.3040	73.9864	71.9838	92.4071	74.6714	57.9468	93.2702	135.607	126.029	159.48	135.757	119.907	168.036
Tb927.3.1920	85.4954	85.0718	72.2671	88.1758	78.4401	88.8638	89.7936	120.414	159.48	99.2067	136.579	196.602
Tb927.11.1430	138.93	130.88	187.184	84.9983	69.9601	85.1917	174.09	116.671	159.48	116.176	94.2587	78.977
Tb927.7.4060	174.279	167.962	84.1141	149.343	127.907	83.7229	153.932	115.423	159.48	146.852	152.609	115.945
Tb927.5.1060	92.0719	93.7971	97.1459	66.7277	71.3735	81.5197	144.769	143.499	159.48	166.432	110.93	132.749
Tb927.7.2980	160.304	111.248	124.394	71.4939	84.0935	78.582	115.449	117.295	159.48	71.7943	83.3581	94.1002
Tb927.3.4960	53.4346	28.3573	35.5412	86.5871	64.3068	58.7529	198.829	141.003	159.48	234.963	274.44	215.086
Tb927.10.4750	60.0112	85.0718	180.075	50.8401	55.8268	50.6744	107.203	94.8339	159.48	70.489	63.4804	92.4199
Tb927.11.9720	144.684	207.226	28.4329	151.726	125.787	36.7206	137.439	156.601	159.48	127.924	125.037	129.388
Tb927.8.1360	34.527	21.8133	31.9871	34.1582	18.3734	36.7206	125.528	144.746	159.48	175.57	160.304	184.84
Tb11.v5.0740.1	21.3738	67.6212	17.7706	23.0369	38.8667	19.8291	157.597	134.14	159.48	102.47	91.0527	114.265
Tb927.10.10920	74.8084	191.957	82.9294	161.259	142.04	143.945	121.863	139.131	157.134	185.36	176.976	247.013
Tb11.v5.0171.1	68.2319	87.2531	106.624	107.241	83.3868	126.319	137.439	126.653	157.134	173.612	193.647	267.177
Tb927.10.10940	93.7161	159.237	74.6365	166.025	142.04	125.584	153.016	111.679	157.134	165.78	155.815	241.972
Tb927.11.4700	143.04	200.682	131.502	67.522	126.494	116.771	183.252	180.309	157.134	169.696	133.373	90.7395
Tb927.10.11080	35.349	21.8133	87.6683	64.3445	51.5868	96.2079	79.7147	97.3295	157.134	129.882	186.594	215.086
Tb927.9.12360	110.98	63.2585	149.273	26.2144	49.4668	85.1917	119.114	133.516	157.134	57.4355	71.175	99.1413
Tb927.10.5880	84.6733	50.1705	97.1459	105.652	79.1468	82.9885	127.36	90.4665	157.134	184.707	177.617	132.749
Tb927.2.370	38.6373	41.4452	39.0953	54.0176	37.4534	52.8776	143.853	104.192	157.134	84.8479	110.93	137.79
Tb927.11.1110.1	19.7297	13.088	15.4012	14.2988	12.0134	19.0947	114.533	103.569	157.134	114.218	153.251	164.675
Tb927.8.1780	55.0787	17.4506	60.42	193.828	91.8668	257.044	116.365	129.149	154.789	154.032	169.922	159.634
Tb927.11.3240	164.414	296.661	162.305	162.053	221.894	165.977	236.395	195.283	154.789	206.898	191.082	154.593
Tb927.10.8780	101.937	56.7145	124.394	117.568	77.7335	139.538	134.69	146.618	154.789	176.875	175.693	201.643
Tb927.10.280	67.4098	109.066	152.827	72.2883	94.6935	110.896	105.37	100.449	154.789	120.092	107.083	189.881
Tb927.9.5860	141.396	213.77	142.165	97.7084	139.92	105.755	220.819	228.35	154.789	179.486	136.579	176.438
Tb927.11.16510	93.7161	65.4398	100.7	67.522	58.6534	104.286	108.119	101.073	154.789	105.733	87.8466	181.479
Tb927.6.4140	176.745	181.05	222.725	118.362	72.0801	94.0046	142.937	197.779	154.789	83.5425	128.884	89.0591
Tb927.11.980	52.6125	63.2585	77.0059	94.5308	62.1868	88.1294	146.602	113.551	154.789	162.516	169.922	199.963
Tb927.4.2080	74.8084	34.9012	94.7765	51.6345	39.5734	79.3164	183.252	149.738	154.789	148.81	141.067	171.397
Tb927.7.7420	116.734	170.144	98.3306	111.213	100.347	74.1755	255.637	238.332	154.789	275.429	200.701	137.79
Tb927.2.4580	55.0787	76.3465	73.4518	29.3919	18.3734	59.4873	133.774	131.02	154.789	69.8363	60.2743	147.872
Tb927.8.2160	133.998	87.2531	59.2353	38.1301	51.5868	43.3303	279.46	213.376	154.789	184.055	123.113	152.913
Tb11.v5.0646.1	41.1035	61.0772	58.0506	30.1863	43.1067	36.7206	118.198	131.02	154.789	132.493	112.213	115.945
Tb927.8.710	59.1891	28.3573	73.4518	29.3919	20.4934	27.9076	204.326	173.446	154.789	132.493	134.655	100.822
Tb927.11.12100	134.82	47.9892	13.0318	90.559	38.8667	12.485	120.946	100.449	154.789	151.421	178.258	215.086
Tb927.8.6760	285.259	335.925	336.457	190.65	418.347	431.099	131.942	136.636	152.444	124.008	126.961	122.666
Tb927.6.5070	195.653	185.413	233.387	190.65	186.56	195.353	200.661	195.907	152.444	189.276	233.403	196.602
Tb927.10.4880	121.666	139.605	131.502	120.745	106.707	136.601	114.533	122.286	152.444	140.978	94.8999	162.995
Tb927.5.3510	73.9864	37.0826	85.2988	91.3533	67.8401	108.693	169.508	138.507	152.444	144.894	194.93	156.274
Tb927.8.2520	105.225	109.066	84.1141	101.68	93.2802	90.3326	171.341	173.446	152.444	202.33	180.182	223.488
Tb11.v5.0565.1	32.8828	34.9012	52.1271	29.3919	37.4534	57.2841	157.597	139.131	152.444	139.673	108.365	87.3788
Tb927.10.4170	13.9752	13.088	18.9553	19.8594	14.1334	32.3141	82.4635	106.064	152.444	121.398	180.182	178.118
Tb927.5.1900	35.349	30.5386	59.2353	24.6257	19.08	29.3765	96.2074	92.9621	152.444	63.9622	82.0756	80.6573
Tb11.v5.0394.1	6.57657	17.4506	9.47765	25.4201	19.7867	16.8915	90.7098	117.295	152.444	107.692	199.418	139.47
Tb927.10.9800	18.0856	82.8905	13.0318	15.0932	50.8801	9.54735	133.774	143.499	152.444	116.176	117.343	126.027
Tb927.10.13800	15.6193	39.2639	10.6624	13.5044	19.7867	8.07852	116.365	131.644	152.444	71.1417	84.6405	87.3788
Tb927.6.810	0.822071	0	1.18471	2.38313	2.12	4.40647	26.5716	13.726	152.444	13.7062	10.9007	136.109
Tb11.v5.0376.1	1.64414	0	0	0	0.706668	0.734411	9.16261	1.24781	152.444	5.22141	4.48851	109.223
Tb927.3.2960	170.169	111.248	175.337	174.763	110.947	182.868	87.0448	87.347	150.099	154.684	135.297	164.675
Tb927.9.12320	147.151	191.957	183.629	92.1477	131.44	165.977	202.494	208.385	150.099	196.455	161.586	136.109
Tb927.11.4950	49.3242	41.4452	129.133	88.9702	69.9601	163.039	133.774	103.569	150.099	161.211	140.426	188.2
Tb927.10.13780	46.036	30.5386	30.8024	139.016	98.2269	154.226	156.681	162.84	150.099	167.738	164.792	191.561
Tb927.10.1890	99.4706	56.7145	107.808	75.4658	79.1468	129.991	137.439	131.02	150.099	159.906	146.838	166.356
Tb927.6.5095	147.151	87.2531	165.859	113.596	84.0935	123.381	107.203	117.918	150.099	99.2067	96.8236	164.675
Tb927.11.2410	126.599	229.039	172.967	59.5783	98.2269	120.443	206.159	195.283	150.099	139.02	117.343	112.584
Tb927.7.7430	131.531	202.864	78.1906	127.895	103.174	80.0508	237.312	215.872	150.099	241.49	153.251	139.47
Tb927.9.3400	34.527	26.1759	61.6047	31.7751	28.2667	53.612	134.69	105.44	150.099	110.955	94.8999	120.986
Tb927.11.10060	80.5629	170.144	79.3753	64.3445	87.6268	44.0647	131.942	138.507	150.099	105.733	100.671	127.707
Tb927.11.13250	68.2319	109.066	37.9106	77.8489	80.5602	35.9862	179.587	139.131	150.099	150.768	144.274	245.333
Tb927.4.4730	159.482	4.36266	131.502	16.6819	6.36001	30.8453	123.695	93.586	150.099	77.0158	60.9155	152.913
Tb927.2.3610	106.047	39.2639	55.6812	53.2233	42.4001	27.1732	164.011	133.516	150.099	137.715	100.671	82.3377
Tb927.10.890	11.509	6.54398	4.73882	7.14939	14.1334	13.2194	142.02	144.123	150.099	166.432	178.899	146.191
Tb927.7.3830	6.57657	13.088	8.29294	13.5044	18.3734	8.07852	67.8033	167.207	150.099	68.531	172.487	137.79
Tb927.11.3730	212.916	128.698	326.979	204.949	240.267	458.273	233.646	174.694	147.753	221.91	176.976	154.593
Tb927.11.14880	144.684	113.429	167.044	103.269	97.5202	120.443	141.104	117.295	147.753	154.032	162.228	193.242
Tb927.11.12880	44.3918	67.6212	120.84	56.4008	34.6267	96.9423	109.035	136.012	147.753	105.081	112.854	173.077
Tb927.9.10790	54.2567	61.0772	86.4835	55.6064	49.4668	74.1755	92.5423	94.21	147.753	117.482	120.549	126.027
Tb927.11.14780	40.2815	43.6266	71.0824	27.0088	25.44	58.7529	134.69	111.055	147.753	116.176	96.8236	90.7395
Tb927.10.8420	23.018	26.1759	31.9871	31.7751	25.44	34.5173	131.025	140.379	147.753	160.558	153.892	196.602
Tb927.10.3840	29.5945	119.973	21.3247	70.6995	117.307	29.3765	213.489	158.472	147.753	163.169	130.808	117.625
Tb927.10.3820	28.7725	15.2693	31.9871	21.4482	15.5467	26.4388	114.533	108.56	147.753	120.745	144.274	181.479
Tb927.8.5850	12.3311	19.632	15.4012	13.5044	14.84	11.7506	132.858	143.499	147.753	157.948	162.869	201.643
Tb927.11.11960	9.04278	10.9066	10.6624	7.94377	4.24001	3.67206	37.5667	37.4344	147.753	29.3704	23.725	110.904
Tb927.11.11590	153.727	187.594	225.094	185.884	233.907	275.404	197.912	183.429	145.408	201.677	175.052	134.429
Tb927.5.700	208.806	109.066	194.292	192.239	125.08	197.557	137.439	146.618	145.408	131.841	140.426	151.232
Tb927.9.10100	136.464	248.671	68.713	134.25	185.854	115.303	297.785	194.659	145.408	257.807	153.892	85.6984
Tb927.10.5620	140.574	279.21	170.598	95.3252	110.947	104.286	154.848	145.37	145.408	103.775	92.9763	119.306
Tb11.v5.0458.1	50.1463	327.199	34.3565	109.624	159.707	85.9261	179.587	168.455	145.408	152.073	124.396	210.045
Tb927.9.10530	36.9932	34.9012	72.2671	30.1863	27.5601	63.1594	105.37	99.8251	145.408	93.9853	121.831	139.47
Tb927.3.2180	97.8264	93.7971	62.7894	38.9245	72.0801	59.4873	115.449	119.166	145.408	105.733	103.877	124.347
Tb927.2.5810	67.4098	52.3519	59.2353	45.2795	36.7467	53.612	193.331	165.335	145.408	154.032	145.556	164.675
Tb927.9.1600	23.8401	30.5386	26.0635	45.2795	39.5734	47.0023	96.2074	112.927	145.408	133.146	176.334	250.374
Tb927.11.15910	50.9684	74.1652	36.7259	49.2514	43.8134	33.7829	186.001	183.429	145.408	165.127	145.556	139.47
Tb927.1.880	16.4414	41.4452	22.5094	45.2795	41.6934	26.4388	207.075	180.309	145.408	253.891	249.433	221.808
Tb927.10.3790	15.6193	21.8133	2.36941	19.8594	16.96	9.54735	127.36	131.02	145.408	151.421	132.09	105.863
Tb927.10.6200	203.051	163.6	305.654	127.895	125.787	254.841	84.296	79.8601	143.063	70.489	57.7094	176.438
Tb927.11.5950	342.803	222.495	271.298	326.489	226.84	235.746	163.094	124.157	143.063	225.173	174.411	215.086
Tb927.10.14700	225.247	189.776	164.674	279.621	191.507	213.714	143.853	119.166	143.063	114.218	134.655	112.584
Tb11.v5.0265.1	128.243	111.248	178.891	161.259	174.547	213.714	168.592	152.857	143.063	187.971	179.54	142.831
Tb927.8.980	107.691	93.7971	152.827	98.5027	87.6268	135.866	122.779	112.927	143.063	141.631	128.884	164.675
Tb927.11.3720	33.7049	39.2639	84.1141	60.3726	44.5201	127.788	68.7196	94.21	143.063	101.817	96.8236	225.168
Tb927.5.1000	115.09	143.968	95.9612	122.334	77.7335	99.8799	137.439	165.959	143.063	151.421	184.029	188.2
Tb927.7.6900	97.0043	130.88	94.7765	81.8208	92.5735	96.9423	125.528	99.2012	143.063	123.356	132.09	186.52
Tb927.9.12510	76.4526	154.874	124.394	104.063	100.347	95.4735	158.513	166.583	143.063	165.78	178.258	112.584
Tb927.3.2230	268.817	194.138	82.9294	217.659	134.974	89.5982	207.075	190.916	143.063	232.353	178.258	168.036
Tb927.3.5490	65.7657	71.9838	84.1141	50.8401	59.3601	89.5982	131.025	104.816	143.063	104.428	116.701	104.182
Tb11.v5.0649.1	141.396	124.336	95.9612	101.68	101.76	84.4573	210.74	148.49	143.063	189.276	136.579	124.347
Tb927.4.2030	155.371	207.226	108.993	98.5027	96.1068	80.7852	133.774	139.755	143.063	92.68	109.007	164.675
Tb927.11.14080	65.7657	28.3573	116.101	36.5413	40.2801	54.3464	80.6309	82.9796	143.063	45.0346	71.8162	132.749
Tb927.11.1090	18.9076	37.0826	27.2482	44.4851	40.9867	47.7367	90.7098	89.8426	143.063	137.062	191.724	193.242
Tb927.10.13250	30.4166	19.632	37.9106	38.1301	23.32	44.7991	112.7	96.0817	143.063	136.409	124.396	205.004
Tb927.9.12610	145.507	196.32	181.26	147.754	161.827	175.524	162.178	177.813	140.717	173.612	150.045	151.232
Tb927.9.4230	97.8264	71.9838	157.566	127.895	136.387	148.351	138.355	136.012	140.717	135.757	129.526	139.47
Tb11.v5.0531.1	144.684	338.106	139.795	92.1477	115.894	115.303	141.104	155.977	140.717	104.428	89.7702	115.945
Tb927.10.10960	91.2498	152.693	71.0824	156.492	156.88	106.49	150.267	122.91	140.717	168.39	149.403	208.365
Tb927.7.2680	102.759	139.605	220.355	57.1951	83.3868	100.614	110.868	89.8426	140.717	76.3631	67.3277	122.666
Tb927.2.3780	124.133	139.605	79.3753	114.39	116.6	85.9261	206.159	176.566	140.717	197.761	176.334	131.068
Tb927.11.7600	103.581	95.9784	107.808	94.5308	66.4268	77.8476	152.099	124.157	140.717	124.661	125.037	89.0591
Tb927.11.16890	60.0112	37.0826	60.42	43.6907	33.2134	74.1755	118.198	94.21	140.717	110.955	138.503	220.127
Tb927.4.1540	58.367	69.8025	52.1271	58.7839	67.1335	71.2379	134.69	137.26	140.717	124.661	141.709	210.045
Tb927.10.14470	57.5449	43.6266	72.2671	60.3726	42.4001	69.7691	126.444	117.918	140.717	127.924	134.014	142.831
Tb927.8.4870	53.4346	45.8079	80.56	76.2602	45.2268	69.0347	117.281	116.047	140.717	135.757	169.281	173.077
Tb927.2.1810	50.9684	45.8079	37.9106	68.3164	55.1201	54.3464	136.523	108.56	140.717	159.906	136.579	144.511
Tb927.11.6140	32.0608	167.962	60.42	61.167	116.6	52.8776	214.405	225.23	140.717	158.6	134.014	126.027
Tb11.v5.0242.1	36.9932	21.8133	45.0188	54.0176	27.5601	45.5335	138.355	128.525	140.717	165.78	153.251	176.438
Tb927.7.6420	54.2567	52.3519	33.1718	35.747	73.4935	27.9076	145.685	146.618	140.717	148.157	141.067	117.625
Tb927.1.1710	28.7725	32.7199	35.5412	27.0088	28.9734	27.1732	115.449	120.414	140.717	113.566	110.289	157.954
Tb927.8.1050	27.1283	15.2693	21.3247	22.2426	16.96	21.2979	112.7	96.7056	140.717	114.871	117.984	154.593
Tb927.5.4220	198.119	115.61	110.178	142.193	211.294	247.497	387.578	219.615	138.372	419.018	337.28	142.831
Tb927.5.760	101.115	82.8905	92.4071	207.332	144.16	192.416	89.7936	90.4665	138.372	156.642	195.571	245.333
Tb927.10.12700	182.5	185.413	188.368	187.473	176.667	113.834	201.577	176.566	138.372	272.819	179.54	205.004
Tb927.11.11010	97.8264	91.6158	146.904	57.1951	58.6534	71.2379	164.927	91.0904	138.372	102.47	108.365	117.625
Tb927.8.870	30.4166	39.2639	72.2671	48.457	51.5868	59.4873	89.7936	104.192	138.372	75.7104	84.6405	136.109
Tb927.7.6640	40.2815	39.2639	74.6365	40.5132	33.9201	56.5497	107.203	88.5948	138.372	97.2487	94.8999	147.872
Tb927.6.3090	41.9256	28.3573	48.5729	59.5783	45.9334	55.8153	138.355	124.157	138.372	159.906	145.556	151.232
Tb927.7.830	26.3063	21.8133	30.8024	25.4201	23.32	45.5335	125.528	119.79	138.372	150.115	115.419	178.118
Tb927.11.7460	129.065	370.826	28.4329	159.67	204.934	43.3303	229.981	230.846	138.372	246.711	252.639	184.84
Tb927.9.5320	39.4594	150.512	37.9106	46.8682	77.0268	35.2517	174.09	162.84	138.372	190.581	148.762	147.872
Tb927.9.5960	39.4594	39.2639	78.1906	17.4763	22.6134	32.3141	82.4635	76.1167	138.372	43.7293	46.1675	119.306
Tb927.10.9690	20.5518	0	45.0188	11.9157	6.36001	27.9076	78.7984	122.286	138.372	88.1112	89.129	137.79
Tb927.2.5600	2.46621	0	2.36941	7.94377	7.06668	8.81294	40.3155	40.554	138.372	45.6873	46.1675	156.274
Tb927.8.3530	381.441	274.847	321.055	225.603	222.6	256.31	151.183	149.114	136.027	154.684	115.419	109.223
Tb927.9.3170	106.869	76.3465	268.928	87.3815	98.2269	250.434	134.69	128.525	136.027	112.26	95.5412	99.1413
Tb927.5.2940	146.329	124.336	101.885	318.545	240.974	199.76	158.513	150.985	136.027	193.845	220.578	156.274
Tb927.6.700	104.403	143.968	71.0824	137.427	102.467	136.601	196.08	165.959	136.027	180.139	180.182	213.406
Tb927.3.5530	58.367	89.4344	61.6047	81.8208	57.2401	110.896	153.016	140.379	136.027	139.02	132.09	152.913
Tb927.6.2640	65.7657	67.6212	90.0377	123.128	89.0402	110.162	175.006	160.968	136.027	187.971	166.075	164.675
Tb927.11.7560	120.844	98.1598	139.795	105.652	108.827	105.755	186.917	137.883	136.027	195.15	174.411	193.242
Tb927.10.180	141.396	98.1598	127.948	118.362	74.9068	88.1294	142.02	127.901	136.027	109.65	120.549	115.945
Tb927.11.11480	127.421	87.2531	120.84	134.25	66.4268	88.1294	118.198	104.192	136.027	94.638	149.403	174.758
Tb927.11.10540	92.0719	47.9892	116.101	57.9895	38.1601	81.5197	181.42	123.534	136.027	128.577	168.64	184.84
Tb927.11.12420	82.2071	34.9012	81.7447	65.1389	44.5201	78.582	124.611	112.303	136.027	145.547	126.32	152.913
Tb927.7.6770	91.2498	54.5332	91.2224	67.522	78.4401	74.91	125.528	135.388	136.027	126.619	133.373	166.356
Tb927.6.4990	129.065	159.237	99.5153	109.624	85.5068	71.2379	147.518	144.123	136.027	136.409	117.343	127.707
Tb927.11.12840	43.5697	28.3573	34.3565	65.1389	50.1734	52.1432	94.3749	96.0817	136.027	128.577	173.769	186.52
Tb927.6.620	30.4166	23.9946	47.3882	50.0457	37.4534	50.6744	145.685	106.688	136.027	173.612	156.457	198.283
Tb927.11.14680	11.509	26.1759	33.1718	42.102	18.3734	42.5959	121.863	121.662	136.027	148.157	157.739	186.52
Tb927.10.5010	49.3242	54.5332	39.0953	45.2795	52.2934	39.6582	194.247	164.088	136.027	195.803	161.586	110.904
Tb11.v5.0657.1	39.4594	17.4506	42.6494	62.7558	38.1601	33.0485	90.7098	115.423	136.027	95.2907	109.007	147.872
Tb927.10.8390	10.6869	6.54398	9.47765	24.6257	12.72	22.7668	95.2911	84.8514	136.027	118.787	130.808	183.159
Tb927.11.14165	65.7657	13.088	61.6047	122.334	94.6935	207.838	122.779	97.9534	133.681	165.78	169.281	245.333
Tb927.9.13380	85.4954	74.1652	167.044	79.4377	79.1468	170.383	133.774	124.781	133.681	95.2907	103.236	100.822
Tb927.6.2490	74.8084	98.1598	127.948	88.9702	95.4002	111.631	109.951	117.295	133.681	126.619	109.648	99.1413
Tb927.4.2060	62.4774	58.8959	84.1141	61.9614	51.5868	70.5035	119.114	75.4927	133.681	107.692	116.701	127.707
Tb927.11.3980	153.727	170.144	75.8212	82.6152	89.0402	68.3003	203.41	163.464	133.681	223.868	132.732	112.584
Tb927.7.290	69.876	47.9892	68.713	36.5413	24.0267	58.0185	106.286	96.0817	133.681	97.2487	66.6864	147.872
Tb927.7.6980	48.5022	50.1705	53.3118	42.8964	39.5734	55.8153	98.9562	89.8426	133.681	114.218	108.365	114.265
Tb927.10.9830	19.7297	52.3519	50.9424	18.2707	19.7867	38.1894	127.36	119.166	133.681	122.703	102.595	97.4609
Tb927.9.9290	72.3422	106.885	97.1459	22.2426	57.2401	23.5012	234.563	205.889	133.681	88.7639	91.6939	35.2876
Tb927.4.1500	14.7973	21.8133	13.0318	15.8875	21.2	16.157	79.7147	96.0817	133.681	120.092	119.907	159.634
Tb11.v5.0505.1	13.9752	56.7145	20.14	15.0932	26.8534	13.9538	85.2123	84.2274	133.681	56.7828	83.9993	62.1734
Tb927.11.5940	9.86485	117.792	13.0318	3.97188	15.5467	2.20323	115.449	190.916	133.681	46.34	39.1142	43.6894
Tb927.11.900	195.653	176.688	337.641	141.399	183.734	334.892	142.937	117.295	131.336	161.211	110.289	198.283
Tb927.2.5160	133.175	281.391	144.534	287.564	269.241	282.748	167.676	142.875	131.336	189.929	190.441	189.881
Tb927.5.4230	170.991	133.061	111.362	160.464	238.147	240.153	311.529	156.601	131.336	328.296	225.067	105.863
Tb927.8.4580	124.133	117.792	181.26	147.754	159.707	193.885	101.705	99.2012	131.336	120.092	134.655	152.913
Tb927.11.1150	55.9008	32.7199	81.7447	126.306	101.054	115.303	109.951	89.2187	131.336	125.966	128.884	132.749
Tb927.6.4920	97.0043	61.0772	126.764	66.7277	65.7201	113.834	118.198	83.6035	131.336	85.5005	73.0986	183.159
Tb927.3.5440	66.5877	34.9012	86.4835	69.9052	76.3201	107.958	103.537	126.029	131.336	105.733	93.6175	122.666
Tb927.8.3380	37.8153	74.1652	94.7765	92.1477	77.0268	103.552	88.8773	103.569	131.336	93.9853	101.312	109.223
Tb927.11.16480	141.396	115.61	156.381	92.1477	77.0268	101.349	141.104	105.44	131.336	93.9853	65.404	73.9359
Tb927.7.1340	211.272	344.65	92.4071	204.155	163.24	80.0508	164.927	192.787	131.336	175.57	148.762	141.15
Tb927.9.11050	44.3918	32.7199	42.6494	55.6064	74.2001	68.3003	130.109	102.945	131.336	113.566	109.648	152.913
Tb927.4.3810	53.4346	45.8079	65.1588	43.6907	38.8667	58.0185	131.942	99.2012	131.336	92.0273	80.7932	75.6162
Tb927.11.5820	91.2498	117.792	88.853	49.2514	69.9601	55.8153	123.695	112.927	131.336	112.26	88.4878	112.584
Tb927.4.2530	46.858	122.154	74.6365	34.1582	57.2401	53.612	139.272	123.534	131.336	82.8898	86.5641	110.904
Tb927.10.8170	58.367	30.5386	43.8341	70.6995	48.7601	44.0647	125.528	87.9709	131.336	124.008	100.671	107.543
Tb927.11.16660	15.6193	10.9066	24.8788	30.1863	12.72	41.8614	116.365	109.808	131.336	114.218	98.106	149.552
Tb927.6.4980	24.6621	143.968	11.8471	42.8964	84.0935	16.8915	261.134	198.402	131.336	204.288	171.846	119.306
Tb927.6.4500	18.9076	45.8079	16.5859	17.4763	40.2801	7.34411	285.873	199.65	131.336	203.635	150.045	97.4609
Tb927.9.9210	18.0856	30.5386	7.10824	11.1213	12.0134	2.20323	193.331	165.335	131.336	80.2791	54.5033	23.5251
Tb927.10.1390	273.75	119.973	229.833	157.287	91.8668	226.199	128.277	100.449	128.991	105.733	101.312	127.707
Tb927.10.15180	91.2498	148.33	177.706	84.2039	144.16	202.698	227.233	189.668	128.991	218.646	170.563	141.15
Tb927.8.6060	260.596	327.199	161.12	178.735	207.76	135.866	244.642	222.111	128.991	227.784	171.205	109.223
Tb11.v5.0616.1	120.022	146.149	120.84	131.867	162.534	134.397	119.114	99.8251	128.991	140.325	137.861	166.356
Tb927.11.6460	96.1823	82.8905	136.241	98.5027	62.1868	129.256	161.262	100.449	128.991	150.115	110.93	218.447
Tb927.7.4170	228.536	141.786	98.3306	149.343	106.707	105.021	139.272	152.233	128.991	106.386	125.678	137.79
Tb927.10.10970	77.2746	126.517	72.2671	164.436	143.454	103.552	131.025	91.7143	128.991	155.337	189.8	176.438
Tb927.10.8000	64.9436	56.7145	82.9294	75.4658	55.1201	101.349	88.8773	97.3295	128.991	114.218	127.602	161.315
Tb927.10.310	53.4346	50.1705	60.42	47.6626	57.9468	96.9423	119.114	104.816	128.991	106.386	98.7472	151.232
Tb11.v5.0197.1	62.4774	50.1705	108.993	75.4658	68.5468	94.7391	100.789	79.2362	128.991	134.451	80.7932	77.2966
Tb927.10.13490	109.335	78.5278	95.9612	97.7084	76.3201	88.8638	113.616	112.303	128.991	130.535	109.007	147.872
Tb927.11.13670	62.4774	28.3573	50.9424	64.3445	43.8134	74.1755	131.942	123.534	128.991	146.852	139.785	149.552
Tb11.v5.0337.1	44.3918	54.5332	69.8977	51.6345	51.5868	70.5035	143.853	154.729	128.991	153.379	135.297	114.265
Tb927.11.15990	53.4346	52.3519	46.2035	61.9614	55.1201	45.5335	131.025	104.192	128.991	127.272	143.632	136.109
Tb927.10.10000	125.777	163.6	54.4965	54.0176	107.414	44.7991	175.922	223.983	128.991	134.451	159.663	139.47
Tb927.10.720	30.4166	26.1759	13.0318	25.4201	25.44	38.1894	95.2911	74.2449	128.991	71.1417	79.5108	127.707
Tb927.11.2370	20.5518	45.8079	24.8788	31.7751	36.7467	37.455	262.051	101.697	128.991	150.115	152.609	114.265
Tb927.11.4380	22.1959	8.72531	16.5859	27.0088	19.7867	22.0323	127.36	119.79	128.991	112.913	126.961	110.904
Tb927.11.14090	50.9684	100.341	53.3118	21.4482	14.1334	12.485	98.9562	79.8601	128.991	308.063	173.128	6434.1
Tb927.7.5230	41.9256	37.0826	21.3247	28.5976	17.6667	11.7506	112.7	124.781	128.991	104.428	103.877	67.2144
Tb11.v5.0767.1	8.22071	6.54398	10.6624	19.8594	9.89335	11.0162	48.5618	29.9475	128.991	56.7828	51.9385	146.191
Tb927.2.5540	1.64414	4.36266	2.36941	8.73815	7.77335	10.2818	21.074	30.5714	128.991	52.2141	42.3202	152.913
Tb927.10.8590	9.04278	6.54398	5.92353	7.14939	2.12	8.81294	59.557	58.6473	128.991	57.4355	70.5337	120.986
Tb927.7.7470	44.3918	102.522	5.92353	18.2707	36.0401	7.34411	96.2074	160.344	128.991	107.692	105.801	102.502
Tb927.10.3020	5.75449	2.18133	9.47765	16.6819	9.89335	6.6097	107.203	104.816	128.991	105.081	128.243	124.347
Tb927.11.6130	299.234	172.325	220.355	202.566	216.24	250.434	230.898	177.19	126.646	213.425	144.915	105.863
Tb927.5.1090	162.77	189.776	159.935	115.185	129.32	141.741	142.937	121.038	126.646	143.589	121.19	122.666
Tb927.8.4500	85.4954	56.7145	73.4518	155.698	124.374	123.381	105.37	103.569	126.646	120.092	129.526	102.502
Tb927.7.1910	69.0539	78.5278	59.2353	86.5871	89.0402	105.755	129.193	116.047	126.646	150.768	117.984	112.584
Tb927.3.1900	49.3242	56.7145	80.56	89.7646	58.6534	105.021	92.5423	78.6123	126.646	107.692	107.724	131.068
Tb927.8.6000	154.549	183.232	59.2353	204.155	187.974	95.4735	189.666	172.822	126.646	244.101	233.403	137.79
Tb927.10.7930	88.7836	52.3519	61.6047	108.83	65.7201	71.9723	123.695	94.21	126.646	124.661	146.838	120.986
Tb927.8.730	58.367	178.869	86.4835	29.3919	65.7201	68.3003	231.814	223.983	126.646	125.966	139.785	97.4609
Tb927.11.11900	73.9864	41.4452	67.5282	51.6345	49.4668	63.1594	92.5423	103.569	126.646	130.535	141.709	156.274
Tb927.8.6940	43.5697	34.9012	49.7577	43.6907	28.9734	57.2841	104.454	94.8339	126.646	120.092	114.136	126.027
Tb927.3.1620	48.5022	37.0826	42.6494	66.7277	45.2268	56.5497	100.789	84.8514	126.646	116.176	130.167	107.543
Tb927.10.8630	65.7657	52.3519	74.6365	36.5413	40.2801	52.1432	71.4683	68.6298	126.646	66.5729	57.7094	92.4199
Tb927.10.540	59.1891	87.2531	39.0953	84.2039	65.0135	52.1432	175.922	164.711	126.646	146.852	161.586	119.306
Tb927.11.6680	38.6373	45.8079	36.7259	30.9807	48.7601	38.1894	170.425	138.507	126.646	261.723	131.449	112.584
Tb927.8.5470	71.5202	58.8959	52.1271	42.102	24.0267	35.9862	73.3009	109.808	126.646	56.7828	63.4804	87.3788
Tb927.10.15750	14.7973	4.36266	10.6624	27.8032	9.89335	13.9538	65.9708	98.5773	126.646	114.218	160.945	162.995
Tb927.8.5100	13.1531	6.54398	2.36941	13.5044	13.4267	5.87529	214.405	111.679	126.646	287.177	184.67	147.872
Tb927.7.2330	18.0856	6.54398	9.47765	9.53252	9.89335	5.14088	234.563	217.12	126.646	175.57	146.838	73.9359
Tb927.9.1980	156.193	63.2585	175.337	127.895	111.654	169.649	89.7936	71.1254	124.3	98.5541	108.365	105.863
Tb927.11.6250	126.599	133.061	99.5153	97.7084	72.0801	104.286	143.853	151.609	124.3	171.001	151.327	114.265
Tb927.2.4520	53.4346	47.9892	84.1141	43.6907	74.2001	102.083	93.4586	84.2274	124.3	95.2907	100.03	114.265
Tb927.8.6790	50.1463	39.2639	73.4518	68.3164	54.4134	86.6605	82.4635	91.7143	124.3	93.3326	114.136	139.47
Tb927.8.1870	257.308	298.842	75.8212	247.846	255.107	82.9885	261.134	210.881	124.3	313.937	246.868	119.306
Tb927.10.7860	27.1283	37.0826	39.0953	61.167	63.6001	69.7691	57.7244	92.9621	124.3	90.7219	121.19	161.315
Tb927.9.9640	35.349	34.9012	54.4965	57.9895	31.0934	68.3003	118.198	86.0992	124.3	114.871	141.067	144.511
Tb927.4.2740	64.1215	61.0772	126.764	74.6714	61.4801	60.2217	48.5618	58.0234	124.3	32.6338	84.6405	92.4199
Tb927.7.2870	164.414	113.429	60.42	230.369	96.8135	58.0185	125.528	107.312	124.3	137.715	165.434	157.954
Tb927.11.14950	51.7905	78.5278	68.713	87.3815	79.8535	54.3464	209.824	197.155	124.3	217.994	218.655	144.511
Tb927.3.1190	31.2387	28.3573	34.3565	40.5132	24.0267	51.4088	109.035	108.56	124.3	122.05	125.678	154.593
Tb927.10.14990	55.9008	45.8079	71.0824	46.0739	37.4534	50.6744	87.0448	97.3295	124.3	97.9014	75.0223	85.6984
Tb927.8.2820	60.0112	30.5386	55.6812	52.4289	36.7467	49.2056	79.7147	55.5277	124.3	89.4166	96.8236	120.986
Tb927.11.16280	33.7049	109.066	45.0188	65.9333	65.0135	47.7367	186.917	164.711	124.3	163.169	115.419	127.707
Tb927.10.12500	120.022	205.045	47.3882	104.858	127.907	47.0023	228.149	216.496	124.3	244.101	172.487	117.625
Tb927.2.2260	20.5518	8.72531	15.4012	33.3638	21.9067	39.6582	70.5521	80.484	124.3	114.218	122.472	161.315
Tb927.11.6040	73.9864	47.9892	71.0824	27.0088	16.96	30.8453	133.774	139.131	124.3	104.428	71.8162	77.2966
Tb927.11.4030	26.3063	13.088	35.5412	25.4201	38.1601	26.4388	125.528	127.277	124.3	114.218	118.625	157.954
Tb927.2.1760	37.8153	74.1652	21.3247	38.9245	37.4534	15.4226	185.085	146.618	124.3	186.013	153.251	107.543
Tb927.5.1820	55.9008	54.5332	23.6941	36.5413	36.7467	11.7506	120.946	137.883	124.3	56.7828	69.8925	70.5752
Tb927.9.5620	12.3311	4.36266	14.2165	9.53252	4.94668	11.7506	35.7342	54.9038	124.3	51.5614	58.9919	68.8948
Tb927.11.7685	5.75449	30.5386	3.55412	12.71	26.8534	2.93765	161.262	141.003	124.3	105.733	103.877	188.2
Tb927.11.9400	94.5381	67.6212	87.6683	95.3252	95.4002	96.9423	139.272	112.303	121.955	97.9014	198.777	220.127
Tb927.9.5650	48.5022	82.8905	90.0377	46.0739	72.7868	88.1294	43.0643	56.7755	121.955	55.4774	53.2209	57.1323
Tb927.9.13785	146.329	161.418	126.764	96.1196	94.6935	84.4573	148.434	137.883	121.955	131.841	108.365	131.068
Tb927.11.2490	44.3918	30.5386	66.3435	42.102	33.2134	77.1132	64.1383	81.7318	121.955	101.817	100.671	110.904
Tb927.7.2650	135.642	87.2531	174.152	94.5308	96.1068	71.9723	91.6261	105.44	121.955	103.123	155.174	75.6162
Tb927.5.1680	51.7905	23.9946	58.0506	46.8682	27.5601	42.5959	122.779	111.055	121.955	91.3746	94.8999	73.9359
Tb927.5.440	517.082	294.479	62.7894	230.369	103.174	41.127	415.982	298.228	121.955	240.837	163.51	94.1002
Tb927.11.750	32.0608	23.9946	27.2482	23.0369	26.1467	38.9238	96.2074	120.414	121.955	91.3746	105.801	114.265
Tb927.7.7100	27.1283	21.8133	52.1271	23.0369	16.96	37.455	87.0448	91.0904	121.955	81.5845	92.9763	136.109
Tb927.4.4490	85.4954	61.0772	49.7577	47.6626	39.5734	35.2517	138.355	125.405	121.955	119.44	112.213	94.1002
Tb927.4.2220	18.9076	19.632	29.6177	26.2144	21.2	32.3141	113.616	89.2187	121.955	112.913	121.19	188.2
Tb927.11.890	13.9752	34.9012	18.9553	15.0932	19.7867	22.0323	120.946	134.764	121.955	114.218	95.5412	134.429
Tb11.v5.0510.1	9.86485	13.088	17.7706	15.0932	12.0134	22.0323	58.6407	94.8339	121.955	60.0462	92.3351	77.2966
Tb927.7.6300	10.6869	21.8133	28.4329	7.94377	11.3067	17.6259	48.5618	59.8951	121.955	48.9507	57.7094	117.625
Tb927.1.570	27.1283	30.5386	18.9553	17.4763	14.1334	13.2194	70.5521	57.3994	121.955	50.256	57.0682	152.913
Tb927.8.6640	35.349	6.54398	28.4329	23.8313	26.1467	11.7506	86.1285	80.484	121.955	60.0462	60.9155	63.8537
Tb927.5.1790	14.7973	10.9066	11.8471	5.56064	12.0134	5.14088	118.198	102.321	121.955	99.2067	85.2817	84.0181
Tb927.5.2020	6.57657	2.18133	13.0318	7.94377	6.36001	4.40647	54.9756	49.9126	121.955	45.0346	41.0378	151.232
Tb927.11.12210	150.439	76.3465	212.062	151.726	123.667	234.277	123.695	121.038	119.61	147.505	123.113	131.068
Tb927.5.4210	189.076	139.605	113.732	154.109	235.32	231.34	308.78	150.362	119.61	318.506	245.586	85.6984
Tb927.11.5960	308.277	172.325	264.189	324.106	187.267	207.104	178.671	117.295	119.61	223.868	135.297	221.808
Tb927.10.13710	86.3174	78.5278	97.1459	80.2321	139.214	193.885	189.666	128.525	119.61	217.994	160.945	152.913
Tb927.2.5980	119.2	43.6266	143.349	147.754	67.8401	157.164	76.0496	68.0059	119.61	108.344	91.0527	166.356
Tb927.11.13280	91.2498	102.522	120.84	86.5871	103.88	131.46	127.36	121.038	119.61	138.367	121.831	142.831
Tb927.10.10980	96.1823	172.325	81.7447	159.67	149.107	129.991	139.272	99.2012	119.61	163.169	173.128	231.89
Tb11.v5.1054.1	160.304	37.0826	159.935	42.102	60.0668	122.647	45.813	33.0671	119.61	38.5079	32.0608	122.666
Tb927.9.9450	60.8332	106.885	90.0377	62.7558	62.1868	120.443	109.035	100.449	119.61	106.386	116.06	147.872
Tb927.11.4900	118.378	74.1652	81.7447	131.072	61.4801	117.506	124.611	89.2187	119.61	115.524	88.4878	102.502
Tb927.11.3080	119.2	106.885	105.439	137.427	96.1068	105.021	86.1285	67.382	119.61	61.3515	62.1979	73.9359
Tb927.2.380	48.5022	82.8905	91.2224	72.2883	101.054	96.9423	106.286	96.0817	119.61	54.8248	95.5412	80.6573
Tb927.11.2360	133.175	119.973	88.853	111.213	113.067	94.7391	169.508	130.397	119.61	154.032	132.732	102.502
Tb927.3.3780	124.955	178.869	91.2224	122.334	88.3335	82.9885	91.6261	113.551	119.61	73.7524	91.6939	115.945
Tb927.10.9910	77.2746	39.2639	74.6365	58.7839	59.3601	66.8314	102.621	109.184	119.61	127.924	130.808	119.306
Tb11.v5.0745.1	215.383	50.1705	31.9871	158.081	100.347	58.0185	341.765	132.268	119.61	253.238	180.823	104.182
Tb927.1.4050	39.4594	54.5332	55.6812	32.5695	46.6401	44.0647	107.203	124.157	119.61	118.787	117.984	90.7395
Tb11.v5.0553.1	10.6869	15.2693	14.2165	27.8032	25.44	35.9862	91.6261	104.192	119.61	124.661	153.251	181.479
Tb927.6.3670	36.1711	30.5386	31.9871	34.9526	29.6801	27.9076	182.336	172.198	119.61	152.073	146.197	136.109
Tb927.2.2670	13.9752	10.9066	18.9553	15.0932	16.96	21.2979	111.784	146.618	119.61	84.1952	85.9229	131.068
Tb927.10.13630	53.4346	93.7971	23.6941	66.7277	66.4268	20.5635	139.272	137.26	119.61	149.463	126.32	151.232
Tb927.10.840	25.4842	15.2693	42.6494	25.4201	14.84	17.6259	55.8919	84.2274	119.61	52.8667	92.3351	105.863
Tb927.8.7410	51.7905	165.781	29.6177	79.4377	86.9202	16.8915	124.611	117.295	119.61	126.619	123.755	78.977
Tb927.6.2110	25.4842	41.4452	16.5859	27.8032	32.5067	13.2194	61.3895	50.5365	119.61	31.9811	43.6027	85.6984
Tb11.v5.0619.1	22.1959	6.54398	27.2482	16.6819	12.0134	12.485	64.1383	72.3732	119.61	53.5194	57.7094	65.5341
Tb927.4.800	13.9752	15.2693	5.92353	25.4201	12.72	9.54735	106.286	122.91	119.61	105.733	103.236	102.502
Tb927.1.1050	8.22071	6.54398	5.92353	9.53252	12.72	2.93765	51.3106	61.7668	119.61	48.9507	53.8621	43.6894
Tb927.7.1780	188.254	146.149	432.418	166.025	189.387	395.113	90.7098	95.4578	117.264	125.966	106.442	228.529
Tb927.11.14220	78.0967	95.9784	140.98	102.475	101.054	249.7	84.296	103.569	117.264	137.715	107.083	221.808
Tb927.8.4190	76.4526	43.6266	58.0506	98.5027	77.7335	140.273	85.2123	111.055	117.264	93.9853	137.22	144.511
Tb927.10.8720	158.66	122.154	123.209	147.754	118.014	126.319	164.927	127.901	117.264	155.99	159.022	112.584
Tb927.3.4500	35.349	106.885	136.241	42.8964	43.8134	124.85	67.8033	114.175	117.264	68.531	64.1216	95.7806
Tb927.5.1360	126.599	32.7199	161.12	63.5501	41.6934	124.116	45.813	35.5627	117.264	32.6338	46.1675	110.904
Tb927.11.11460	127.421	150.512	118.471	130.278	126.494	123.381	209.824	157.225	117.264	169.043	156.457	157.954
Tb927.6.4670	119.2	119.973	86.4835	100.091	118.014	112.365	154.848	116.671	117.264	148.157	119.907	115.945
Tb927.8.4220	79.7409	119.973	106.624	89.7646	104.587	99.8799	120.03	111.055	117.264	115.524	120.549	97.4609
Tb10.v4.0052	59.1891	65.4398	90.0377	69.1108	70.6668	94.7391	50.3943	46.1691	117.264	62.6569	63.4804	68.8948
Tb927.8.6390	117.556	104.704	79.3753	86.5871	118.014	79.3164	110.868	100.449	117.264	135.104	103.877	112.584
Tb927.3.5020	36.9932	30.5386	66.3435	44.4851	28.2667	74.1755	102.621	87.347	117.264	101.165	94.8999	129.388
Tb927.3.2100	84.6733	128.698	78.1906	60.3726	72.7868	69.7691	90.7098	94.21	117.264	98.5541	76.9459	157.954
Tb927.10.7350	46.036	21.8133	67.5282	54.0176	36.0401	62.425	142.937	112.927	117.264	160.558	119.266	156.274
Tb927.11.14340	24.6621	17.4506	33.1718	36.5413	33.2134	55.0808	102.621	96.0817	117.264	131.188	101.953	97.4609
Tb927.2.1800	35.349	39.2639	43.8341	45.2795	40.2801	41.127	120.03	99.8251	117.264	114.218	102.595	144.511
Tb927.7.3000	31.2387	26.1759	35.5412	29.3919	29.6801	38.1894	98.0399	86.0992	117.264	101.817	114.778	136.109
Tb927.8.2060	7.39864	4.36266	20.14	19.8594	12.72	27.1732	100.789	91.0904	117.264	133.799	100.671	174.758
Tb927.8.1770	8.22071	15.2693	14.2165	20.6538	16.2534	18.3603	74.2171	87.9709	117.264	99.2067	107.724	132.749
Tb927.11.2750	40.2815	10.9066	35.5412	15.0932	9.89335	13.2194	72.3846	59.2712	117.264	47.6453	71.8162	85.6984
Tb927.7.4520	121.666	119.973	152.827	177.94	126.494	205.635	186.917	142.875	114.919	178.181	160.304	137.79
Tb927.10.2970	145.507	80.7091	228.648	183.501	129.32	204.901	85.2123	79.8601	114.919	123.356	113.495	112.584
Tb927.3.3200	137.286	93.7971	200.215	135.838	168.894	177.728	94.3749	78.6123	114.919	88.7639	88.4878	151.232
Tb927.5.2930	106.047	150.512	145.719	105.652	113.774	120.443	140.188	107.312	114.919	122.05	117.984	131.068
Tb927.10.8020	205.518	183.232	145.719	136.633	166.774	107.958	158.513	158.472	114.919	156.642	130.808	132.749
Tb927.4.1080	77.2746	93.7971	82.9294	89.7646	77.7335	99.8799	89.7936	68.0059	114.919	109.65	73.0986	105.863
Tb927.10.4130	76.4526	58.8959	86.4835	68.3164	83.3868	99.1455	68.7196	81.1079	114.919	97.9014	87.8466	90.7395
Tb927.9.5490	54.2567	30.5386	97.1459	46.0739	46.6401	93.2702	71.4683	60.519	114.919	71.1417	75.6635	63.8537
Tb927.9.1440	61.6553	87.2531	75.8212	75.4658	83.3868	85.9261	122.779	160.968	114.919	126.619	118.625	63.8537
Tb927.11.9640	92.0719	109.066	58.0506	96.914	87.6268	85.1917	157.597	110.432	114.919	155.337	131.449	87.3788
Tb927.11.3500	75.6305	50.1705	72.2671	73.877	64.3068	80.0508	86.1285	77.9884	114.919	90.7219	85.2817	115.945
Tb927.3.4760	75.6305	56.7145	65.1588	48.457	45.9334	78.582	138.355	134.14	114.919	127.272	112.854	102.502
Tb927.11.8090	96.1823	89.4344	81.7447	85.7927	101.76	77.8476	145.685	139.755	114.919	128.577	92.9763	102.502
Tb05.5K5.130	63.2994	32.7199	71.0824	61.167	31.8001	71.9723	76.0496	79.8601	114.919	75.7104	110.289	122.666
Tb927.5.3030	49.3242	30.5386	67.5282	53.2233	36.0401	69.0347	103.537	92.3382	114.919	104.428	103.236	100.822
Tb927.1.720	85.4954	61.0772	112.547	61.167	45.2268	68.3003	78.7984	82.9796	114.919	87.4586	67.3277	85.6984
Tb927.6.4970	36.9932	54.5332	42.6494	51.6345	67.8401	63.1594	131.025	118.542	114.919	127.272	171.205	151.232
Tb927.11.10770	36.9932	47.9892	66.3435	52.4289	39.5734	61.6906	105.37	76.1167	114.919	92.68	73.7398	80.6573
Tb927.8.3020	14.7973	19.632	18.9553	45.2795	53.7068	59.4873	100.789	97.3295	114.919	227.784	220.578	299.104
Tb11.v5.0356.1	21.3738	52.3519	20.14	23.8313	41.6934	50.6744	132.858	132.892	114.919	141.631	110.289	117.625
Tb927.10.5450	48.5022	63.2585	30.8024	51.6345	49.4668	47.0023	92.5423	88.5948	114.919	89.4166	92.9763	114.265
Tb927.1.2570	76.4526	50.1705	80.56	54.812	43.1067	44.0647	125.528	114.175	114.919	73.0997	69.2513	68.8948
Tb927.11.16820	36.9932	30.5386	85.2988	25.4201	18.3734	31.5797	81.5472	84.8514	114.919	31.3284	33.3432	95.7806
Tb927.3.3270	113.446	154.874	60.42	65.9333	53.0001	30.1109	135.607	157.848	114.919	95.2907	107.724	105.863
Tb927.11.13180	43.5697	82.8905	29.6177	27.0088	61.4801	25.7044	132.858	129.149	114.919	131.188	114.136	85.6984
Tb927.10.15730	13.1531	6.54398	16.5859	13.5044	11.3067	16.157	97.1236	81.7318	114.919	102.47	94.8999	89.0591
Tb927.10.15120	6.57657	47.9892	10.6624	5.56064	24.7334	8.07852	119.114	125.405	114.919	80.9318	63.4804	87.3788
Tb927.10.10180	1.64414	13.088	5.92353	1.58875	13.4267	5.87529	13.7439	13.102	114.919	26.107	30.1371	257.095
Tb927.6.5080	152.083	104.704	222.725	142.988	140.627	254.841	144.769	127.901	112.574	169.043	131.449	168.036
Tb927.11.5450	64.9436	74.1652	132.687	171.585	72.0801	132.194	158.513	106.064	112.574	187.318	125.037	92.4199
Tb927.8.1950	115.912	93.7971	101.885	72.2883	82.6802	106.49	137.439	131.02	112.574	117.482	99.3885	87.3788
Tb927.11.1980	101.115	196.32	93.5918	95.3252	116.6	101.349	131.942	141.627	112.574	154.684	146.838	127.707
Tb927.5.2950	75.6305	45.8079	100.7	79.4377	62.1868	90.3326	110.868	83.6035	112.574	109.65	103.877	115.945
Tb927.11.11550	32.8828	26.1759	48.5729	68.3164	50.8801	88.1294	91.6261	97.3295	112.574	150.115	142.35	134.429
Tb927.11.8210	32.8828	17.4506	34.3565	56.4008	43.8134	85.9261	81.5472	75.4927	112.574	94.638	112.854	139.47
Tb927.2.6050	65.7657	54.5332	62.7894	75.4658	67.1335	81.5197	151.183	138.507	112.574	119.44	109.007	105.863
Tb927.7.3020	159.482	128.698	159.935	92.1477	80.5602	77.1132	78.7984	103.569	112.574	78.9738	91.6939	80.6573
Tb927.11.12150	58.367	87.2531	66.3435	54.0176	77.0268	76.3788	110.868	95.4578	112.574	99.8594	140.426	159.634
Tb927.4.2310	64.9436	250.853	71.0824	71.4939	173.134	75.6444	241.893	199.65	112.574	253.238	202.624	134.429
Tb927.3.1690	61.6553	39.2639	87.6683	35.747	52.2934	66.097	74.2171	65.5102	112.574	72.447	46.8088	105.863
Tb927.11.3300	46.858	32.7199	50.9424	50.8401	29.6801	63.8938	79.7147	87.347	112.574	82.8898	112.854	144.511
Tb927.9.5520	50.1463	34.9012	81.7447	44.4851	38.8667	63.1594	92.5423	82.3557	112.574	79.6265	87.8466	85.6984
Tb927.9.8820	44.3918	39.2639	48.5729	37.3357	38.1601	47.7367	136.523	99.2012	112.574	129.23	108.365	95.7806
Tb927.10.200	75.6305	78.5278	74.6365	65.1389	82.6802	44.7991	79.7147	107.936	112.574	110.302	109.648	90.7395
Tb927.10.11630	51.7905	54.5332	81.7447	11.9157	21.9067	42.5959	91.6261	116.047	112.574	39.8132	65.404	107.543
Tb927.10.730	23.8401	4.36266	29.6177	17.4763	17.6667	37.455	65.9708	48.0408	112.574	49.6034	52.5797	55.4519
Tb927.11.8960	17.2635	8.72531	31.9871	32.5695	12.72	35.2517	78.7984	73.621	112.574	93.3326	94.8999	139.47
Tb927.7.2170	36.9932	54.5332	48.5729	24.6257	62.1868	28.642	152.099	110.432	112.574	84.8479	81.4344	52.0912
Tb11.v5.0817.1	18.0856	23.9946	34.3565	19.8594	22.6134	28.642	58.6407	73.621	112.574	52.2141	62.8392	161.315
Tb927.1.640	22.1959	34.9012	20.14	24.6257	22.6134	27.1732	69.6358	90.4665	112.574	84.1952	85.9229	80.6573
Tb927.4.5120	23.8401	26.1759	18.9553	22.2426	19.08	25.7044	54.9756	66.758	112.574	50.9087	139.785	95.7806
Tb927.10.13280	19.7297	45.8079	16.5859	67.522	50.8801	25.7044	184.168	141.003	112.574	291.746	193.647	154.593
Tb927.5.2120	23.8401	21.8133	41.4647	33.3638	11.3067	23.5012	77.8822	84.2274	112.574	83.5425	74.381	84.0181
Tb11.v5.0863.1	11.509	15.2693	14.2165	15.8875	15.5467	13.2194	83.3797	86.7231	112.574	63.9622	68.6101	90.7395
Tb927.11.3130	24.6621	19.632	14.2165	21.4482	26.8534	11.7506	90.7098	77.3645	112.574	107.039	71.8162	55.4519
Tb927.5.1850	6.57657	2.18133	18.9553	11.9157	7.77335	11.7506	39.3992	38.6822	112.574	41.7713	43.6027	72.2555
Tb927.6.3650	36.1711	76.3465	31.9871	11.9157	20.4934	8.07852	172.257	142.875	112.574	146.199	117.343	70.5752
Tb11.v5.0626.1	5.75449	8.72531	3.55412	9.53252	4.94668	7.34411	21.9903	23.7085	112.574	22.8437	31.4196	94.1002
Tb11.v5.0868.1	4.11035	2.18133	11.8471	6.35501	2.82667	6.6097	49.4781	42.4257	112.574	47.6453	56.427	131.068
Tb11.v5.0833.1	0.822071	2.18133	1.18471	0.794377	2.12	4.40647	29.3203	20.5889	112.574	35.8972	23.0838	102.502
Tb927.11.1270	166.058	113.429	223.909	161.259	138.507	186.54	179.587	122.286	110.229	170.348	103.236	105.863
Tb927.11.9220	115.09	115.61	157.566	117.568	92.5735	132.928	138.355	102.945	110.229	120.092	107.083	84.0181
Tb927.6.4770	79.7409	63.2585	97.1459	76.2602	93.9868	120.443	142.937	99.8251	110.229	175.57	92.9763	152.913
Tb927.7.2550	130.709	80.7091	175.337	83.4096	86.9202	85.1917	87.961	104.192	110.229	71.1417	80.7932	67.2144
Tb927.5.2090	27.9504	50.1705	61.6047	40.5132	64.3068	85.1917	68.7196	66.758	110.229	101.165	122.472	119.306
Tb927.11.15550	42.7477	50.1705	159.935	6.35501	38.8667	83.7229	66.887	81.7318	110.229	58.7408	43.6027	60.493
Tb927.7.2700	128.243	111.248	110.178	75.4658	76.3201	77.8476	88.8773	77.3645	110.229	71.7943	47.45	53.7716
Tb927.1.3850	36.1711	67.6212	69.8977	83.4096	84.0935	77.1132	73.3009	69.2537	110.229	96.596	105.159	176.438
Tb927.10.16120	86.3174	137.424	47.3882	87.3815	114.48	74.91	131.942	109.808	110.229	121.398	121.831	107.543
Tb927.10.4900	32.8828	45.8079	65.1588	41.3076	62.1868	71.9723	131.942	97.9534	110.229	135.104	102.595	109.223
Tb927.8.6830	37.8153	30.5386	60.42	43.6907	38.8667	69.0347	63.222	87.9709	110.229	102.47	84.6405	115.945
Tb927.4.2240	73.1643	71.9838	105.439	30.1863	39.5734	52.8776	180.503	129.149	110.229	108.344	80.7932	90.7395
Tb927.8.4400	34.527	28.3573	43.8341	26.2144	15.5467	47.7367	90.7098	96.7056	110.229	112.913	105.801	100.822
Tb927.5.790	41.1035	34.9012	39.0953	16.6819	49.4668	42.5959	70.5521	93.586	110.229	59.3935	60.9155	112.584
Tb927.1.3250	27.9504	10.9066	30.8024	30.9807	23.32	39.6582	75.1334	89.8426	110.229	98.5541	130.808	161.315
Tb927.10.12490	27.1283	21.8133	28.4329	30.1863	21.9067	38.1894	73.3009	91.0904	110.229	60.0462	108.365	92.4199
Tb927.4.2640	30.4166	19.632	48.5729	31.7751	20.4934	35.9862	82.4635	85.4753	110.229	83.5425	121.831	102.502
Tb927.9.10440	27.1283	23.9946	21.3247	27.0088	25.44	35.2517	106.286	132.268	110.229	137.062	140.426	132.749
Tb927.11.8970	52.6125	194.138	47.3882	44.4851	63.6001	34.5173	140.188	117.918	110.229	114.871	119.907	100.822
Tb927.7.2360	43.5697	76.3465	73.4518	38.1301	65.0135	31.5797	123.695	106.064	110.229	86.1532	79.5108	55.4519
Tb927.7.1220	28.7725	23.9946	45.0188	19.8594	16.2534	27.9076	74.2171	61.1429	110.229	54.8248	69.8925	97.4609
Tb927.8.650	35.349	61.0772	17.7706	23.8313	33.2134	23.5012	142.02	157.225	110.229	104.428	58.3506	42.009
Tb927.2.4830	13.9752	23.9946	4.73882	16.6819	14.84	15.4226	101.705	124.781	110.229	141.631	99.3885	78.977
Tb11.v5.0569.1	36.9932	80.7091	18.9553	41.3076	34.6267	11.0162	105.37	138.507	110.229	147.505	170.563	89.0591
Tb927.8.540	16.4414	19.632	34.3565	19.8594	9.18668	10.2818	105.37	128.525	110.229	82.8898	80.7932	60.493
Tb11.v5.0751.1	3.28828	2.18133	4.73882	2.38313	4.94668	6.6097	21.9903	21.8367	110.229	23.4963	17.3128	110.904
Tb927.11.7675	11.509	45.8079	2.36941	11.1213	21.9067	5.14088	127.36	127.277	110.229	103.123	83.3581	169.716
Tb927.1.1740	3.28828	13.088	5.92353	5.56064	2.82667	3.67206	30.2366	34.9388	110.229	58.7408	113.495	206.684
Tb927.11.9380	0	0	1.18471	2.38313	0.706668	0.734411	14.6602	6.86298	110.229	17.6222	17.954	89.0591
Tb927.8.4540	141.396	111.248	190.738	166.819	232.494	207.838	88.8773	72.3732	107.883	128.577	126.32	193.242
Tb927.8.4640	171.813	119.973	110.178	287.564	138.507	120.443	103.537	62.3907	107.883	77.0158	105.159	84.0181
Tb927.6.2550	54.2567	43.6266	92.4071	76.2602	60.0668	99.8799	120.946	91.7143	107.883	124.661	93.6175	77.2966
Tb927.10.5770	175.101	148.33	167.044	134.25	115.187	95.4735	178.671	131.02	107.883	179.486	126.32	97.4609
Tb927.9.13860	162.77	146.149	123.209	102.475	86.2135	95.4735	114.533	109.184	107.883	71.1417	90.4114	85.6984
Tb927.7.4180	95.3602	93.7971	81.7447	147.754	130.734	90.3326	139.272	170.951	107.883	148.157	175.052	162.995
Tb927.11.3490	73.9864	98.1598	74.6365	111.213	84.0935	88.1294	142.937	96.7056	107.883	110.302	110.93	97.4609
Tb927.11.3740	72.3422	37.0826	98.3306	47.6626	50.1734	84.4573	110.868	82.9796	107.883	86.8059	75.0223	87.3788
Tb927.9.5210	55.9008	45.8079	93.5918	75.4658	60.7734	75.6444	158.513	114.799	107.883	157.948	129.526	95.7806
Tb927.6.2860	42.7477	39.2639	54.4965	38.9245	29.6801	65.3626	48.5618	51.1604	107.883	58.7408	61.5567	52.0912
Tb927.9.7690	23.8401	23.9946	66.3435	47.6626	36.7467	65.3626	80.6309	82.9796	107.883	63.9622	71.8162	70.5752
Tb927.11.4420	68.2319	58.8959	73.4518	66.7277	54.4134	64.6282	129.193	99.2012	107.883	96.596	92.9763	85.6984
Tb927.3.1800	33.7049	45.8079	55.6812	39.7188	55.8268	63.8938	92.5423	91.7143	107.883	80.2791	90.4114	85.6984
Tb927.4.4040	109.335	76.3465	108.993	61.9614	55.1201	62.425	123.695	94.8339	107.883	75.0577	73.7398	72.2555
Tb927.6.860	38.6373	19.632	110.178	29.3919	28.9734	62.425	59.557	58.0234	107.883	59.3935	69.8925	134.429
Tb927.9.11850	48.5022	37.0826	55.6812	48.457	45.9334	61.6906	109.035	77.9884	107.883	121.398	124.396	100.822
Tb927.3.1670	56.7229	26.1759	42.6494	44.4851	35.3334	59.4873	98.9562	75.4927	107.883	84.1952	86.5641	87.3788
Tb927.9.12170	27.1283	30.5386	22.5094	38.1301	38.8667	56.5497	105.37	100.449	107.883	133.146	135.938	120.986
Tb927.3.5620	63.2994	37.0826	50.9424	57.1951	53.0001	52.8776	115.449	106.688	107.883	120.745	117.343	90.7395
Tb927.7.1470	97.8264	113.429	55.6812	47.6626	80.5602	46.2679	146.602	154.729	107.883	153.379	112.213	146.191
Tb927.6.1470	62.4774	74.1652	46.2035	45.2795	67.8401	40.3926	75.1334	86.7231	107.883	73.0997	85.2817	97.4609
Tb927.7.5560	27.9504	28.3573	26.0635	38.1301	26.8534	37.455	106.286	115.423	107.883	101.165	100.671	112.584
Tb927.6.870	13.1531	6.54398	34.3565	15.8875	12.0134	37.455	54.0594	46.793	107.883	73.7524	86.5641	129.388
Tb927.7.1310	39.4594	37.0826	43.8341	49.2514	40.2801	34.5173	129.193	99.2012	107.883	152.073	117.343	82.3377
Tb927.1.3300	18.9076	19.632	34.3565	17.4763	11.3067	32.3141	44.8968	51.1604	107.883	46.9927	50.0148	87.3788
Tb11.v5.0723.1	16.4414	8.72531	9.47765	18.2707	26.8534	27.1732	87.0448	91.7143	107.883	94.638	90.4114	131.068
Tb927.8.800	13.1531	23.9946	22.5094	40.5132	28.9734	23.5012	108.119	109.184	107.883	97.9014	94.8999	63.8537
Tb927.10.7610	26.3063	21.8133	17.7706	30.1863	26.1467	18.3603	106.286	111.055	107.883	152.726	119.266	78.977
Tb927.10.9750	17.2635	4.36266	24.8788	15.0932	11.3067	11.0162	74.2171	73.621	107.883	77.6684	60.9155	100.822
Tb927.2.2650	9.04278	0	14.2165	5.56064	9.89335	11.0162	70.5521	80.484	107.883	78.3211	69.8925	110.904
Tb927.10.10170	9.04278	17.4506	9.47765	11.1213	9.89335	9.54735	36.6504	25.5802	107.883	50.9087	37.1905	273.899
Tb927.11.4820	16.4414	30.5386	2.36941	10.3269	28.9734	5.14088	131.025	116.671	107.883	107.692	109.007	147.872
Tb927.1.2820	9.04278	8.72531	3.55412	2.38313	7.77335	5.14088	54.0594	80.484	107.883	45.6873	74.381	95.7806
Tb927.11.6890	6.57657	6.54398	0	2.38313	0	0.734411	77.8822	71.7493	107.883	88.7639	72.4574	147.872
Tb927.10.3830	0	0	0	0	0	0	170.425	138.507	107.883	162.516	96.1824	87.3788
Tb927.8.2630	122.489	89.4344	146.904	193.828	169.6	225.464	112.7	84.8514	105.538	140.978	173.128	156.274
Tb927.11.4460	123.311	119.973	113.732	174.763	162.534	140.273	103.537	90.4665	105.538	136.409	147.48	233.57
Tb927.4.1840	49.3242	30.5386	88.853	57.1951	55.8268	129.991	89.7936	76.1167	105.538	102.47	75.6635	97.4609
Tb927.7.3980	84.6733	52.3519	116.101	127.1	83.3868	121.178	141.104	119.79	105.538	166.432	112.854	117.625
Tb927.7.840	75.6305	128.698	149.273	39.7188	96.8135	102.818	113.616	124.781	105.538	95.2907	91.0527	97.4609
Tb927.8.3460	41.1035	67.6212	69.8977	107.241	67.8401	102.083	116.365	94.8339	105.538	75.7104	76.3047	102.502
Tb927.8.7020	90.4278	82.8905	87.6683	69.9052	66.4268	91.067	186.001	129.149	105.538	149.463	118.625	115.945
Tb927.9.4200	76.4526	76.3465	105.439	79.4377	65.7201	85.1917	78.7984	81.7318	105.538	82.2372	76.3047	107.543
Tb927.11.4480	92.0719	63.2585	94.7765	111.213	67.1335	84.4573	120.946	74.2449	105.538	121.398	106.442	107.543
Tb927.8.6070	49.3242	30.5386	28.4329	77.0546	34.6267	69.0347	102.621	107.312	105.538	101.817	151.968	100.822
Tb927.8.4320	46.858	21.8133	67.5282	53.2233	57.9468	68.3003	76.9659	77.9884	105.538	92.68	116.701	114.265
Tb927.6.2420	75.6305	106.885	65.1588	83.4096	73.4935	59.4873	121.863	112.303	105.538	107.692	100.671	102.502
Tb927.7.3090	26.3063	28.3573	48.5729	36.5413	35.3334	52.1432	69.6358	76.7406	105.538	81.5845	101.953	152.913
Tb927.10.15290	27.9504	23.9946	52.1271	27.8032	35.3334	43.3303	66.887	92.3382	105.538	68.531	78.8695	68.8948
Tb927.9.13610	36.1711	37.0826	47.3882	30.1863	37.4534	42.5959	85.2123	86.7231	105.538	82.2372	73.0986	126.027
Tb927.3.3770	32.8828	43.6266	58.0506	43.6907	42.4001	41.127	60.4732	63.6385	105.538	56.1301	64.1216	80.6573
Tb927.9.9740	34.527	26.1759	39.0953	25.4201	20.4934	37.455	98.9562	87.9709	105.538	110.302	122.472	109.223
Tb927.10.11220	257.308	172.325	36.7259	131.867	102.467	35.2517	136.523	142.251	105.538	107.692	93.6175	80.6573
Tb927.6.1430	24.6621	32.7199	40.28	27.0088	31.0934	34.5173	94.3749	66.758	105.538	99.2067	96.8236	75.6162
Tb927.11.9240	21.3738	28.3573	36.7259	18.2707	24.7334	34.5173	54.0594	83.6035	105.538	80.2791	98.106	122.666
Tb927.11.13380	29.5945	15.2693	30.8024	32.5695	21.9067	33.0485	64.1383	67.382	105.538	68.531	97.4648	115.945
Tb927.2.5060	23.8401	56.7145	17.7706	38.1301	51.5868	32.3141	153.016	149.114	105.538	150.768	140.426	82.3377
Tb927.9.5680	22.1959	6.54398	42.6494	37.3357	17.6667	31.5797	46.7293	68.0059	105.538	60.0462	76.3047	100.822
Tb927.11.15750	28.7725	17.4506	30.8024	45.2795	25.44	30.8453	87.0448	78.6123	105.538	99.2067	87.8466	36.9679
Tb927.8.2220	25.4842	15.2693	35.5412	22.2426	17.6667	29.3765	67.8033	54.9038	105.538	68.531	71.8162	90.7395
Tb927.10.3010	12.3311	15.2693	26.0635	12.71	22.6134	24.2356	68.7196	82.9796	105.538	67.8783	123.113	139.47
Tb927.11.4230	11.509	19.632	16.5859	38.1301	19.7867	23.5012	77.8822	72.9971	105.538	93.9853	76.3047	68.8948
Tb927.7.2300	59.1891	32.7199	42.6494	28.5976	25.44	18.3603	138.355	132.268	105.538	99.2067	85.2817	94.1002
Tb11.v5.0759.1	19.7297	13.088	13.0318	11.1213	17.6667	16.8915	96.2074	101.697	105.538	88.1112	96.8236	157.954
Tb927.11.13740	46.036	135.242	8.29294	57.1951	59.3601	5.87529	146.602	141.627	105.538	120.092	133.373	80.6573
Tb927.5.800	227.714	126.517	225.094	196.211	133.56	268.795	101.705	126.653	103.193	78.3211	106.442	117.625
Tb927.11.12410	169.347	65.4398	178.891	150.932	110.947	191.681	132.858	127.277	103.193	131.188	101.953	179.799
Tb927.2.2440	96.1823	115.61	138.611	108.035	151.227	165.977	87.961	82.9796	103.193	106.386	137.22	107.543
Tb927.3.2490	90.4278	111.248	132.687	115.979	154.054	154.226	149.351	128.525	103.193	169.043	180.182	186.52
Tb927.2.2160	129.065	78.5278	124.394	140.605	84.8002	110.162	111.784	109.184	103.193	108.997	96.1824	107.543
Tb927.10.10930	79.7409	161.418	75.8212	148.548	130.734	105.021	146.602	102.321	103.193	147.505	159.022	189.881
Tb927.9.13440	97.0043	63.2585	100.7	72.2883	48.0534	96.2079	193.331	114.175	103.193	154.032	134.655	161.315
Tb927.9.13920	178.389	139.605	103.069	139.016	89.7468	92.5358	88.8773	98.5773	103.193	66.5729	96.8236	73.9359
Tb927.11.1370	121.666	128.698	129.133	119.157	134.267	78.582	128.277	144.123	103.193	105.081	91.0527	77.2966
Tb927.11.11570	48.5022	32.7199	54.4965	46.8682	42.4001	78.582	108.119	114.799	103.193	127.924	105.159	85.6984
Tb927.9.5890	83.0291	119.973	75.8212	61.167	134.267	72.7067	185.085	167.207	103.193	161.211	117.984	109.223
Tb927.3.3450	151.261	226.858	100.7	90.559	123.667	67.5658	124.611	121.662	103.193	96.596	97.4648	84.0181
Tb927.4.360	121.666	100.341	94.7765	108.035	83.3868	65.3626	130.109	115.423	103.193	88.1112	79.5108	35.2876
Tb927.10.8830	62.4774	34.9012	36.7259	37.3357	33.2134	60.2217	114.533	117.918	103.193	135.104	117.343	119.306
Tb927.10.3260	138.93	47.9892	127.948	61.167	60.0668	54.3464	108.119	73.621	103.193	78.3211	77.5871	97.4609
Tb927.11.12640	41.9256	39.2639	45.0188	42.102	42.4001	54.3464	44.8968	69.2537	103.193	58.0882	89.7702	112.584
Tb927.11.13810	25.4842	37.0826	68.713	29.3919	50.1734	52.1432	109.951	98.5773	103.193	73.7524	71.175	70.5752
Tb927.1.2670	81.385	43.6266	108.993	38.9245	34.6267	51.4088	102.621	77.9884	103.193	60.0462	41.0378	40.3287
Tb927.3.1910	36.9932	17.4506	40.28	46.0739	28.2667	51.4088	79.7147	70.5015	103.193	90.7219	92.3351	171.397
Tb11.v5.0498.1	42.7477	43.6266	40.28	65.1389	48.0534	44.7991	105.37	117.918	103.193	95.9434	118.625	100.822
Tb927.9.2900	29.5945	39.2639	15.4012	54.0176	60.7734	43.3303	155.764	111.679	103.193	189.929	129.526	178.118
Tb927.4.770	36.9932	28.3573	74.6365	41.3076	26.8534	41.8614	110.868	97.9534	103.193	110.302	103.877	92.4199
Tb927.11.1070	29.5945	21.8133	30.8024	48.457	41.6934	37.455	76.0496	131.644	103.193	118.134	107.724	97.4609
Tb927.7.210	64.9436	115.61	33.1718	61.167	52.2934	36.7206	157.597	127.901	103.193	179.486	126.32	84.0181
Tb927.8.5090	41.9256	67.6212	33.1718	42.102	81.2668	35.9862	355.509	167.831	103.193	371.373	191.082	115.945
Tb927.9.11230	29.5945	87.2531	61.6047	27.8032	59.3601	35.9862	104.454	89.8426	103.193	93.9853	84.6405	85.6984
Tb927.6.3950	46.858	34.9012	69.8977	28.5976	12.0134	34.5173	106.286	107.936	103.193	71.1417	80.152	84.0181
Tb927.7.4390	50.1463	122.154	66.3435	19.8594	46.6401	32.3141	74.2171	121.662	103.193	63.9622	87.2054	65.5341
Tb927.2.4140	23.018	13.088	41.4647	20.6538	14.1334	28.642	91.6261	118.542	103.193	97.9014	79.5108	95.7806
Tb927.11.9780	25.4842	19.632	14.2165	28.5976	33.2134	24.97	111.784	91.7143	103.193	122.703	101.312	97.4609
Tb927.6.2100	31.2387	76.3465	18.9553	38.9245	50.8801	20.5635	105.37	74.2449	103.193	57.4355	51.9385	50.4108
Tb927.5.3670	5.75449	4.36266	8.29294	4.76626	11.3067	16.157	74.2171	64.2624	103.193	78.9738	78.2283	115.945
Tb927.8.6450	17.2635	30.5386	23.6941	19.065	10.6	14.6882	54.0594	81.1079	103.193	50.9087	65.404	94.1002
Tb927.7.7530	4.11035	15.2693	5.92353	15.0932	15.5467	13.2194	65.9708	102.945	103.193	94.638	114.136	73.9359
Tb927.10.6370	5.75449	45.8079	8.29294	10.3269	19.7867	10.2818	90.7098	85.4753	103.193	72.447	71.175	78.977
Tb927.6.4460	19.7297	10.9066	13.0318	14.2988	12.0134	7.34411	150.267	199.65	103.193	55.4774	80.152	77.2966
Tb927.9.15210	4.11035	37.0826	3.55412	7.14939	14.1334	2.93765	70.5521	84.2274	103.193	48.9507	44.2439	58.8126
Tb927.4.3750	2.46621	0	0	2.38313	1.41334	0.734411	30.2366	18.7172	103.193	25.4544	17.954	70.5752
Tb11.v5.0301.1	2.46621	0	0	0	0	0.734411	10.0789	4.99126	103.193	6.52676	2.56486	99.1413
Tb927.7.7090	109.335	54.5332	88.853	138.222	98.2269	151.289	50.3943	70.5015	100.847	82.8898	55.7858	151.232
Tb11.v5.0717.1	79.7409	71.9838	123.209	86.5871	62.8935	107.958	79.7147	82.3557	100.847	78.9738	73.0986	80.6573
Tb927.10.4640	207.162	128.698	87.6683	179.529	121.547	106.49	146.602	132.268	100.847	157.295	116.701	114.265
Tb927.9.13795	166.88	130.88	118.471	120.745	96.8135	97.6767	89.7936	109.184	100.847	67.2256	100.671	57.1323
Tb927.11.5000	95.3602	54.5332	84.1141	111.213	42.4001	86.6605	120.946	76.7406	100.847	112.26	101.312	97.4609
Tb927.8.3820	30.4166	17.4506	77.0059	14.2988	30.3867	71.9723	76.9659	72.9971	100.847	57.4355	64.7628	126.027
Tb927.11.800	45.2139	98.1598	72.2671	66.7277	81.2668	69.7691	122.779	100.449	100.847	107.692	109.648	124.347
Tb927.11.11090	28.7725	45.8079	79.3753	22.2426	43.1067	63.1594	87.961	67.382	100.847	77.6684	73.7398	72.2555
Tb927.4.4550	16.4414	28.3573	22.5094	58.7839	60.0668	59.4873	146.602	144.746	100.847	213.425	169.281	124.347
Tb927.1.700	44.3918	54.5332	60.42	30.9807	21.9067	52.8776	82.4635	63.0146	100.847	60.0462	60.2743	77.2966
Tb927.11.16090	22.1959	52.3519	30.8024	34.9526	30.3867	52.8776	75.1334	67.382	100.847	84.1952	96.8236	97.4609
Tb927.7.1090	8.22071	10.9066	20.14	30.9807	38.1601	50.6744	47.6456	28.0758	100.847	143.589	132.09	203.324
Tb927.6.4740	32.0608	30.5386	39.0953	50.8401	53.0001	47.7367	134.69	124.157	100.847	157.295	125.037	104.182
Tb927.7.2940	140.574	95.9784	46.2035	252.612	85.5068	46.2679	141.104	109.808	100.847	132.493	160.945	149.552
Tb927.10.3310	23.8401	26.1759	42.6494	29.3919	23.32	45.5335	76.0496	79.8601	100.847	86.8059	108.365	58.8126
Tb927.11.12230	35.349	34.9012	54.4965	51.6345	34.6267	41.8614	82.4635	61.1429	100.847	78.3211	60.2743	53.7716
Tb927.4.4510	28.7725	8.72531	30.8024	28.5976	27.5601	41.8614	84.296	81.7318	100.847	107.692	122.472	162.995
Tb927.3.4920	48.5022	32.7199	30.8024	40.5132	41.6934	41.127	77.8822	90.4665	100.847	105.081	78.2283	95.7806
Tb927.11.2510	16.4414	50.1705	27.2482	52.4289	56.5334	37.455	181.42	126.653	100.847	187.971	133.373	127.707
Tb927.1.3260	48.5022	26.1759	27.2482	57.1951	28.2667	35.9862	76.9659	66.1341	100.847	99.2067	96.1824	89.0591
Tb927.4.2500	39.4594	17.4506	34.3565	48.457	44.5201	35.9862	87.0448	109.808	100.847	148.157	140.426	181.479
Tb927.9.5700	18.0856	10.9066	33.1718	29.3919	24.0267	34.5173	86.1285	94.21	100.847	125.314	141.067	154.593
Tb11.v5.0433.1	50.9684	15.2693	28.4329	34.9526	26.1467	32.3141	46.7293	58.0234	100.847	69.1836	52.5797	90.7395
Tb11.v5.0754.1	39.4594	28.3573	36.7259	20.6538	22.6134	30.8453	131.942	129.773	100.847	93.9853	96.1824	97.4609
Tb927.7.6260	18.0856	32.7199	24.8788	25.4201	35.3334	30.1109	98.0399	81.1079	100.847	103.775	135.297	94.1002
Tb927.10.7280	19.7297	15.2693	17.7706	19.065	15.5467	27.9076	70.5521	58.0234	100.847	86.8059	79.5108	100.822
Tb927.2.400	15.6193	26.1759	24.8788	23.8313	20.4934	24.2356	71.4683	71.7493	100.847	49.6034	58.9919	75.6162
Tb927.3.1630	12.3311	6.54398	27.2482	13.5044	15.5467	22.7668	59.557	63.0146	100.847	62.6569	62.1979	126.027
Tb927.9.13520	20.5518	23.9946	15.4012	30.1863	27.5601	22.0323	164.011	106.064	100.847	129.882	91.0527	85.6984
Tb927.10.13450	43.5697	41.4452	27.2482	42.102	46.6401	21.2979	132.858	104.816	100.847	143.589	125.037	94.1002
Tb927.10.11770	17.2635	26.1759	22.5094	25.4201	28.9734	21.2979	86.1285	75.4927	100.847	75.0577	112.213	114.265
Tb927.1.860	17.2635	80.7091	18.9553	38.9245	48.0534	20.5635	85.2123	94.21	100.847	108.997	85.9229	105.863
Tb927.1.540	22.1959	8.72531	24.8788	19.065	13.4267	18.3603	75.1334	79.2362	100.847	82.2372	65.404	52.0912
Tb927.10.4200	24.6621	21.8133	15.4012	27.8032	11.3067	17.6259	78.7984	77.9884	100.847	59.3935	72.4574	105.863
Tb927.8.5200	23.018	8.72531	14.2165	15.0932	14.1334	16.8915	80.6309	89.2187	100.847	102.47	111.572	104.182
Tb927.2.2240	22.1959	15.2693	13.0318	21.4482	24.7334	15.4226	80.6309	99.8251	100.847	92.0273	94.2587	70.5752
Tb927.10.3870	10.6869	10.9066	10.6624	11.1213	5.65334	14.6882	60.4732	53.656	100.847	76.3631	83.9993	117.625
Tb927.9.2730	17.2635	8.72531	40.28	4.76626	12.72	11.7506	44.8968	58.0234	100.847	48.298	50.6561	87.3788
Tb927.8.770	24.6621	15.2693	23.6941	7.94377	4.94668	8.81294	92.5423	102.321	100.847	60.6989	62.1979	48.7305
Tb927.10.14540	0.822071	0	1.18471	5.56064	5.65334	2.93765	87.0448	80.484	100.847	67.8783	96.8236	132.749
Tb927.11.9920	212.094	139.605	196.661	283.593	188.68	268.06	111.784	99.8251	98.5021	138.367	107.083	114.265
Tb927.5.4190	206.34	141.786	107.808	161.259	212.707	236.48	407.736	206.513	98.5021	358.319	316.119	152.913
Tb927.9.4210	101.937	80.7091	152.827	120.745	134.267	149.82	129.193	106.688	98.5021	131.841	126.32	120.986
Tb927.11.14970	83.0291	28.3573	97.1459	76.2602	44.5201	110.896	113.616	77.9884	98.5021	103.775	108.365	119.306
Tb927.9.13070	110.98	61.0772	95.9612	59.5783	62.8935	103.552	123.695	99.8251	98.5021	79.6265	76.9459	90.7395
Tb927.10.10140	92.894	113.429	104.254	67.522	96.1068	102.818	114.533	99.8251	98.5021	109.65	105.801	136.109
Tb927.9.11580	161.948	187.594	116.101	131.867	132.147	91.8014	75.1334	90.4665	98.5021	79.6265	82.7168	114.265
Tb11.v5.0617.1	116.734	163.6	88.853	92.1477	125.787	91.8014	105.37	126.029	98.5021	110.955	142.35	134.429
Tb927.3.1060	87.9616	28.3573	91.2224	74.6714	58.6534	82.2541	121.863	99.8251	98.5021	114.218	109.007	109.223
Tb927.10.7500	47.6801	124.336	59.2353	72.2883	97.5202	77.8476	128.277	130.397	98.5021	162.516	141.067	122.666
Tb927.10.2950	36.1711	23.9946	69.8977	64.3445	35.3334	77.1132	73.3009	61.1429	98.5021	75.0577	98.7472	114.265
Tb927.9.6310	67.4098	65.4398	80.56	62.7558	74.2001	66.8314	110.868	96.7056	98.5021	131.841	101.312	82.3377
Tb927.5.4480	45.2139	30.5386	77.0059	51.6345	36.0401	62.425	70.5521	59.2712	98.5021	77.0158	87.8466	94.1002
Tb927.8.1960	57.5449	32.7199	59.2353	52.4289	69.2535	60.9561	164.011	116.047	98.5021	146.852	134.014	92.4199
Tb927.9.10570	47.6801	43.6266	75.8212	45.2795	42.4001	59.4873	79.7147	80.484	98.5021	86.1532	93.6175	127.707
Tb927.8.8330	76.4526	67.6212	95.9612	39.7188	43.8134	58.0185	66.887	54.9038	98.5021	69.1836	64.1216	43.6894
Tb927.9.3680	39.4594	30.5386	74.6365	43.6907	30.3867	58.0185	72.3846	63.0146	98.5021	63.9622	96.1824	77.2966
Tb927.3.5070	32.0608	15.2693	33.1718	31.7751	30.3867	49.2056	78.7984	64.8863	98.5021	60.0462	77.5871	89.0591
Tb927.1.2120	32.0608	26.1759	54.4965	32.5695	22.6134	47.0023	81.5472	74.8688	98.5021	41.1186	51.2973	73.9359
Tb927.11.4280	35.349	21.8133	36.7259	39.7188	34.6267	42.5959	92.5423	85.4753	98.5021	99.2067	97.4648	94.1002
Tb11.v5.0223.1	471.869	318.474	66.3435	206.538	96.1068	41.8614	437.973	277.015	98.5021	261.07	129.526	58.8126
Tb927.7.7500	88.7836	13.088	82.9294	18.2707	24.7334	39.6582	69.6358	71.7493	98.5021	68.531	83.9993	95.7806
Tb927.4.5380	34.527	32.7199	60.42	42.102	33.9201	39.6582	110.868	106.064	98.5021	114.871	126.961	99.1413
Tb11.v5.0504.1	18.9076	26.1759	40.28	27.0088	29.6801	39.6582	99.8724	98.5773	98.5021	86.8059	107.083	92.4199
Tb927.9.9860	66.5877	54.5332	18.9553	78.6433	81.9735	32.3141	182.336	155.977	98.5021	198.413	173.128	95.7806
Tb11.v5.0178.1	64.9436	122.154	54.4965	32.5695	53.7068	32.3141	80.6309	81.1079	98.5021	62.6569	64.1216	70.5752
Tb927.10.12060	47.6801	37.0826	46.2035	30.1863	24.0267	31.5797	76.9659	86.0992	98.5021	63.3096	67.3277	78.977
Tb927.7.250	19.7297	17.4506	27.2482	24.6257	25.44	31.5797	69.6358	96.0817	98.5021	86.1532	84.6405	87.3788
Tb927.11.5970	64.1215	34.9012	56.8659	37.3357	27.5601	30.8453	66.887	69.2537	98.5021	87.4586	62.1979	57.1323
Tb927.5.3230	19.7297	26.1759	9.47765	28.5976	33.2134	27.9076	92.5423	83.6035	98.5021	92.68	75.0223	58.8126
Tb927.10.14420	17.2635	17.4506	24.8788	19.065	21.2	27.9076	74.2171	76.7406	98.5021	84.1952	75.6635	171.397
Tb927.7.2850	79.7409	47.9892	18.9553	107.241	65.0135	27.1732	121.863	91.7143	98.5021	120.092	153.251	94.1002
Tb927.9.8760	12.3311	17.4506	20.14	15.8875	11.3067	27.1732	75.1334	59.8951	98.5021	88.7639	92.3351	100.822
Tb927.9.13620	10.6869	17.4506	11.8471	19.8594	12.72	20.5635	51.3106	67.382	98.5021	69.1836	76.3047	90.7395
Tb927.11.6550	27.9504	23.9946	23.6941	14.2988	14.84	18.3603	69.6358	69.8776	98.5021	74.405	65.404	102.502
Tb927.8.1480	12.3311	10.9066	15.4012	11.9157	10.6	17.6259	88.8773	88.5948	98.5021	93.9853	105.801	95.7806
Tb927.5.1950	12.3311	4.36266	14.2165	6.35501	8.48002	13.9538	56.8082	68.6298	98.5021	43.7293	47.45	38.6483
Tb927.8.8130	1.64414	8.72531	18.9553	13.5044	16.2534	13.9538	41.2317	54.9038	98.5021	48.9507	55.1446	85.6984
Tb927.8.5170	13.1531	4.36266	21.3247	13.5044	6.36001	13.2194	46.7293	62.3907	98.5021	55.4774	64.1216	95.7806
Tb927.11.13520	27.9504	82.8905	20.14	38.9245	69.2535	11.7506	162.178	169.079	98.5021	164.474	143.632	87.3788
Tb927.11.15950	27.1283	45.8079	17.7706	15.0932	28.9734	7.34411	175.922	153.481	98.5021	133.146	119.266	126.027
Tb927.4.420	12.3311	8.72531	7.10824	10.3269	7.77335	5.87529	63.222	85.4753	98.5021	58.0882	66.0452	78.977
Tb11.v5.0431.1	14.7973	8.72531	3.55412	8.73815	6.36001	3.67206	54.0594	40.554	98.5021	42.4239	44.2439	92.4199
Tb927.11.12710	3.28828	4.36266	3.55412	0	0.706668	1.46882	30.2366	19.965	98.5021	30.0231	33.3432	141.15
Tb11.v5.1058.1	217.027	47.9892	303.285	34.1582	51.5868	216.651	52.2269	25.5802	96.1569	30.6758	29.4959	92.4199
Tb927.3.4970	49.3242	50.1705	90.0377	46.8682	53.7068	107.224	78.7984	58.6473	96.1569	75.0577	87.8466	57.1323
Tb927.11.9610	42.7477	115.61	61.6047	52.4289	108.827	91.067	163.094	130.397	96.1569	168.39	121.19	107.543
Tb927.11.2470	144.684	87.2531	129.133	110.418	79.8535	83.7229	96.2074	71.7493	96.1569	95.2907	109.648	174.758
Tb927.11.10900	33.7049	37.0826	59.2353	54.812	62.1868	82.2541	78.7984	89.2187	96.1569	91.3746	126.32	119.306
Tb927.10.10880	78.9188	76.3465	50.9424	103.269	80.5602	77.8476	95.2911	95.4578	96.1569	114.871	114.778	109.223
Tb927.11.15850	68.2319	63.2585	66.3435	59.5783	53.7068	77.1132	107.203	81.1079	96.1569	92.68	103.877	90.7395
Tb927.10.7700	133.175	85.0718	107.808	104.858	87.6268	75.6444	132.858	99.8251	96.1569	146.199	119.266	110.904
Tb927.10.14550	64.9436	85.0718	77.0059	69.1108	80.5602	71.2379	93.4586	67.382	96.1569	95.2907	86.5641	92.4199
Tb927.10.9440	36.9932	61.0772	94.7765	30.9807	39.5734	71.2379	153.016	106.688	96.1569	103.775	78.2283	94.1002
Tb927.8.7530	58.367	109.066	54.4965	54.812	74.2001	69.0347	128.277	123.534	96.1569	119.44	91.0527	114.265
Tb927.11.4880	46.858	34.9012	66.3435	63.5501	43.1067	66.097	81.5472	67.382	96.1569	75.7104	87.8466	89.0591
Tb927.11.1990	87.1395	137.424	67.5282	101.68	100.347	65.3626	190.582	129.149	96.1569	192.539	125.037	95.7806
Tb927.8.7390	58.367	30.5386	71.0824	58.7839	44.5201	60.9561	91.6261	84.8514	96.1569	88.1112	85.9229	90.7395
Tb927.10.5810	67.4098	128.698	62.7894	69.1108	109.534	57.2841	126.444	137.26	96.1569	130.535	154.533	126.027
Tb927.9.8180	48.5022	23.9946	48.5729	49.2514	39.5734	57.2841	104.454	87.347	96.1569	114.871	103.236	120.986
Tb927.10.11440	40.2815	45.8079	65.1588	34.1582	57.2401	52.1432	78.7984	117.295	96.1569	69.8363	75.0223	114.265
Tb11.v5.0695.1	12.3311	13.088	37.9106	32.5695	19.7867	51.4088	63.222	57.3994	96.1569	75.0577	79.5108	120.986
Tb927.10.7060	52.6125	47.9892	40.28	62.7558	39.5734	49.94	111.784	81.1079	96.1569	114.871	100.03	95.7806
Tb927.3.5180	114.268	61.0772	94.7765	61.9614	62.8935	49.2056	94.3749	74.8688	96.1569	57.4355	91.0527	129.388
Tb927.1.1670	28.7725	28.3573	42.6494	22.2426	28.2667	47.7367	115.449	117.295	96.1569	100.512	79.5108	84.0181
Tb927.6.890	26.3063	17.4506	33.1718	28.5976	22.6134	47.0023	104.454	86.0992	96.1569	105.081	103.236	120.986
Tb927.11.16110	17.2635	45.8079	60.42	27.0088	28.9734	46.2679	119.114	116.047	96.1569	101.165	87.2054	67.2144
Tb927.9.4080	32.0608	26.1759	61.6047	58.7839	45.2268	45.5335	63.222	52.4082	96.1569	92.68	99.3885	105.863
Tb11.v5.0547.1	29.5945	26.1759	31.9871	38.9245	19.7867	43.3303	56.8082	53.0321	96.1569	68.531	75.0223	82.3377
Tb927.10.2900	31.2387	82.8905	55.6812	27.8032	55.8268	42.5959	126.444	169.079	96.1569	87.4586	111.572	87.3788
Tb927.10.13517	149.617	139.605	40.28	180.324	106	41.8614	95.2911	113.551	96.1569	116.829	88.4878	127.707
Tb927.4.1850	31.2387	23.9946	34.3565	18.2707	35.3334	41.127	90.7098	81.1079	96.1569	101.817	94.2587	82.3377
Tb927.1.420	32.8828	34.9012	58.0506	30.9807	28.2667	38.9238	95.2911	72.3732	96.1569	52.8667	53.2209	53.7716
Tb927.8.8200	46.858	41.4452	46.2035	34.1582	27.5601	38.1894	75.1334	77.9884	96.1569	73.7524	68.6101	45.3697
Tb11.v5.0831.1	50.1463	54.5332	31.9871	31.7751	41.6934	35.2517	66.887	79.2362	96.1569	60.6989	68.6101	47.0501
Tb927.3.4940	32.8828	23.9946	29.6177	33.3638	19.7867	27.1732	102.621	112.927	96.1569	103.775	107.083	114.265
Tb927.9.2350	9.04278	13.088	10.6624	19.065	20.4934	26.4388	45.813	47.4169	96.1569	79.6265	83.3581	92.4199
Tb927.7.1790	42.7477	10.9066	30.8024	11.9157	29.6801	24.97	72.3846	82.3557	96.1569	72.447	60.9155	62.1734
Tb927.6.4600	17.2635	8.72531	24.8788	27.8032	15.5467	22.7668	96.2074	107.312	96.1569	88.1112	96.1824	68.8948
Tb927.10.12240	47.6801	41.4452	40.28	28.5976	26.8534	22.0323	105.37	87.347	96.1569	90.0693	75.0223	72.2555
Tb927.4.3500	30.4166	54.5332	39.0953	26.2144	33.2134	21.2979	60.4732	68.0059	96.1569	60.6989	53.8621	70.5752
Tb927.11.2590	21.3738	30.5386	23.6941	15.8875	12.0134	21.2979	73.3009	82.9796	96.1569	80.9318	73.0986	80.6573
Tb927.6.650	9.04278	10.9066	18.9553	15.0932	14.1334	21.2979	62.3057	63.6385	96.1569	78.9738	73.0986	94.1002
Tb927.7.3520	27.9504	28.3573	24.8788	23.0369	13.4267	14.6882	82.4635	59.2712	96.1569	59.3935	38.473	58.8126
Tb927.11.5850	28.7725	19.632	34.3565	12.71	20.4934	11.0162	105.37	111.055	96.1569	75.0577	73.7398	85.6984
Tb11.0880	10.6869	113.429	11.8471	15.8875	69.2535	11.0162	138.355	107.936	96.1569	92.68	77.5871	72.2555
Tb927.10.11030	2.46621	28.3573	11.8471	11.9157	16.96	11.0162	143.853	140.379	96.1569	163.169	123.755	73.9359
Tb927.11.6830	6.57657	4.36266	10.6624	19.8594	13.4267	8.81294	58.6407	79.2362	96.1569	73.0997	66.6864	80.6573
Tb927.3.1720	104.403	63.2585	81.7447	189.062	97.5202	181.4	55.8919	38.6822	93.8116	93.9853	105.159	102.502
Tb927.6.600	67.4098	34.9012	129.133	146.165	86.9202	157.898	91.6261	91.7143	93.8116	114.218	109.648	129.388
Tb927.5.1050	99.4706	28.3573	135.056	62.7558	53.7068	121.912	98.9562	76.1167	93.8116	80.9318	76.3047	78.977
Tb11.v5.0508.1	27.9504	91.6158	77.0059	39.7188	114.48	99.1455	82.4635	88.5948	93.8116	49.6034	54.5033	80.6573
Tb927.11.3060	55.0787	58.8959	73.4518	59.5783	70.6668	94.0046	113.616	114.799	93.8116	114.871	107.724	57.1323
Tb927.3.1120	129.887	157.056	85.2988	144.577	164.654	88.1294	188.75	188.42	93.8116	210.814	203.907	112.584
Tb927.11.3360	97.0043	34.9012	111.362	88.1758	60.0668	85.9261	71.4683	86.7231	93.8116	95.9434	87.8466	70.5752
Tb11.v5.0678.1	112.624	135.242	67.5282	93.7365	96.1068	77.1132	140.188	132.892	93.8116	161.211	116.701	95.7806
Tb927.10.15310	23.018	21.8133	26.0635	40.5132	28.2667	73.4411	57.7244	82.3557	93.8116	77.6684	77.5871	115.945
Tb927.5.510	75.6305	47.9892	78.1906	30.1863	43.1067	72.7067	64.1383	63.0146	93.8116	78.9738	58.9919	90.7395
Tb927.10.10390	59.1891	106.885	66.3435	53.2233	84.0935	71.9723	124.611	108.56	93.8116	111.608	83.9993	110.904
Tb927.11.4130	32.8828	39.2639	60.42	43.6907	57.9468	71.9723	84.296	79.8601	93.8116	105.081	82.0756	124.347
Tb927.10.7690	54.2567	58.8959	61.6047	63.5501	45.2268	69.0347	100.789	96.7056	93.8116	119.44	110.289	132.749
Tb927.7.4450	47.6801	39.2639	35.5412	36.5413	39.5734	67.5658	101.705	100.449	93.8116	141.631	110.93	117.625
Tb927.11.11500	50.9684	23.9946	68.713	57.9895	33.2134	63.8938	79.7147	98.5773	93.8116	104.428	110.93	124.347
Tb927.3.2900	73.1643	133.061	49.7577	74.6714	68.5468	62.425	207.991	152.857	93.8116	156.642	138.503	89.0591
Tb927.8.4810	32.0608	178.869	72.2671	38.1301	105.294	58.7529	148.434	148.49	93.8116	151.421	122.472	90.7395
Tb927.8.6200	40.2815	23.9946	63.9741	36.5413	38.1601	53.612	90.7098	109.184	93.8116	133.799	113.495	102.502
Tb927.4.1220	42.7477	37.0826	50.9424	53.2233	38.1601	51.4088	82.4635	93.586	93.8116	65.2676	98.106	100.822
Tb927.5.2430	64.9436	76.3465	66.3435	29.3919	78.4401	49.2056	143.853	167.207	93.8116	154.032	85.9229	82.3377
Tb927.11.11430	27.1283	13.088	40.28	23.8313	24.7334	46.2679	97.1236	102.321	93.8116	110.302	100.671	82.3377
Tb927.10.2290	55.0787	39.2639	56.8659	46.0739	33.2134	44.7991	51.3106	52.4082	93.8116	45.6873	48.7324	53.7716
Tb927.11.11250	50.9684	89.4344	58.0506	51.6345	47.3468	44.0647	75.1334	95.4578	93.8116	89.4166	73.0986	89.0591
Tb927.8.4050	65.7657	58.8959	31.9871	47.6626	69.2535	43.3303	145.685	121.038	93.8116	182.097	134.655	107.543
Tb927.10.4280	53.4346	69.8025	45.0188	16.6819	28.9734	41.8614	92.5423	85.4753	93.8116	72.447	47.45	67.2144
Tb927.3.3560	57.5449	74.1652	39.0953	85.7927	78.4401	39.6582	100.789	112.303	93.8116	128.577	99.3885	141.15
Tb927.7.3620	32.0608	106.885	33.1718	40.5132	65.7201	38.9238	144.769	127.277	93.8116	142.283	109.007	84.0181
Tb927.11.3510	18.0856	23.9946	24.8788	27.0088	19.7867	38.9238	74.2171	68.0059	93.8116	66.5729	93.6175	78.977
Tb927.11.1160	27.9504	21.8133	35.5412	33.3638	27.5601	36.7206	80.6309	88.5948	93.8116	75.0577	89.7702	70.5752
Tb927.10.14610	35.349	21.8133	56.8659	39.7188	18.3734	35.9862	71.4683	81.1079	93.8116	82.2372	62.1979	85.6984
Tb927.9.8410	52.6125	45.8079	34.3565	31.7751	28.9734	31.5797	126.444	127.901	93.8116	112.913	108.365	82.3377
Tb927.11.13920	23.8401	17.4506	36.7259	17.4763	20.4934	31.5797	101.705	78.6123	93.8116	77.0158	92.3351	102.502
Tb927.10.12120	23.8401	8.72531	21.3247	25.4201	14.1334	30.8453	65.9708	51.7843	93.8116	72.447	64.7628	99.1413
Tb927.9.11800	30.4166	32.7199	21.3247	20.6538	34.6267	25.7044	64.1383	103.569	93.8116	62.6569	70.5337	85.6984
Tb927.11.11880	18.0856	10.9066	15.4012	21.4482	18.3734	24.97	62.3057	71.1254	93.8116	67.2256	87.8466	99.1413
Tb927.1.1840	20.5518	10.9066	23.6941	30.1863	16.96	23.5012	49.4781	51.1604	93.8116	40.4659	48.0912	109.223
Tb927.8.6500	12.3311	10.9066	40.28	17.4763	6.36001	23.5012	73.3009	56.7755	93.8116	43.0766	27.5723	70.5752
Tb927.10.4910	31.2387	19.632	23.6941	26.2144	25.44	21.2979	40.3155	63.0146	93.8116	52.2141	61.5567	53.7716
Tb927.11.1380	22.1959	17.4506	52.1271	19.065	26.1467	20.5635	96.2074	107.312	93.8116	105.733	103.236	97.4609
Tb927.6.5150	10.6869	23.9946	24.8788	15.8875	13.4267	20.5635	131.025	129.149	93.8116	139.673	137.22	151.232
Tb927.9.13710	48.5022	43.6266	28.4329	35.747	29.6801	19.8291	128.277	78.6123	93.8116	103.123	79.5108	55.4519
Tb11.v5.0701.1	34.527	28.3573	42.6494	17.4763	24.0267	19.8291	106.286	111.055	93.8116	81.5845	73.7398	90.7395
Tb927.11.6790	26.3063	50.1705	15.4012	64.3445	58.6534	19.8291	93.4586	85.4753	93.8116	95.9434	100.03	58.8126
Tb927.11.1260	26.3063	32.7199	13.0318	34.1582	40.2801	17.6259	96.2074	106.688	93.8116	107.692	95.5412	57.1323
Tb927.4.620	31.2387	19.632	30.8024	19.8594	10.6	16.157	101.705	91.0904	93.8116	93.9853	73.0986	70.5752
Tb927.11.12440	12.3311	47.9892	16.5859	11.1213	28.9734	15.4226	72.3846	62.3907	93.8116	55.4774	67.3277	65.5341
Tb927.10.2650	16.4414	6.54398	20.14	19.065	8.48002	14.6882	60.4732	56.1516	93.8116	62.0042	80.152	84.0181
Tb927.7.2140	46.036	26.1759	77.0059	5.56064	15.5467	13.2194	80.6309	82.9796	93.8116	22.191	28.8547	36.9679
Tb927.1.2190	7.39864	6.54398	18.9553	9.53252	8.48002	13.2194	84.296	71.7493	93.8116	50.256	51.9385	95.7806
Tb927.6.4570	169.347	61.0772	227.464	206.538	143.454	326.079	82.4635	58.6473	91.4663	68.531	76.3047	47.0501
Tb927.10.1550	131.531	74.1652	163.489	132.661	93.2802	190.213	76.0496	54.9038	91.4663	85.5005	85.9229	60.493
Tb927.10.2730	88.7836	139.605	131.502	81.8208	154.054	182.868	100.789	76.7406	91.4663	117.482	89.7702	82.3377
Tb927.7.3940	287.725	174.506	170.598	202.566	174.547	157.898	196.08	157.225	91.4663	165.78	120.549	122.666
Tb927.10.10750	115.09	69.8025	138.611	84.2039	116.6	146.148	92.5423	88.5948	91.4663	104.428	103.236	105.863
Tb927.4.450	97.0043	89.4344	123.209	86.5871	68.5468	112.365	112.7	92.3382	91.4663	87.4586	87.8466	60.493
Tb927.3.3000	106.047	95.9784	74.6365	96.914	96.1068	94.7391	150.267	108.56	91.4663	125.966	121.19	109.223
Tb927.3.720	77.2746	111.248	100.7	100.886	123.667	82.9885	56.8082	111.055	91.4663	73.0997	89.7702	90.7395
Tb927.7.4030	67.4098	45.8079	68.713	97.7084	84.0935	80.7852	62.3057	53.0321	91.4663	54.1721	73.0986	84.0181
Tb927.8.6090	61.6553	30.5386	75.8212	88.9702	62.8935	76.3788	97.1236	77.9884	91.4663	98.5541	106.442	146.191
Tb927.2.4280	35.349	37.0826	60.42	51.6345	54.4134	74.91	63.222	58.0234	91.4663	97.9014	81.4344	142.831
Tb927.8.890	84.6733	58.8959	74.6365	81.0264	81.2668	73.4411	81.5472	101.697	91.4663	73.0997	53.2209	129.388
Tb927.10.1970	65.7657	58.8959	72.2671	62.7558	44.5201	63.8938	128.277	87.347	91.4663	123.356	114.778	131.068
Tb927.2.3720	47.6801	28.3573	52.1271	40.5132	37.4534	60.2217	66.887	38.0583	91.4663	72.447	42.9615	70.5752
Tb927.7.2860	157.838	137.424	35.5412	245.462	95.4002	53.612	111.784	106.688	91.4663	137.715	151.968	137.79
Tb11.v5.0613.1	40.2815	56.7145	58.0506	34.9526	28.9734	52.1432	63.222	66.758	91.4663	75.0577	62.8392	97.4609
Tb927.11.7170	77.2746	93.7971	43.8341	79.4377	68.5468	46.2679	107.203	84.8514	91.4663	93.3326	87.2054	65.5341
Tb927.5.1250	30.4166	30.5386	48.5729	34.1582	25.44	46.2679	82.4635	72.3732	91.4663	74.405	73.0986	94.1002
Tb927.5.2850	52.6125	69.8025	84.1141	64.3445	60.0668	45.5335	73.3009	49.2887	91.4663	58.0882	82.0756	84.0181
Tb927.11.5090	98.6485	56.7145	118.471	9.53252	35.3334	44.7991	67.8033	68.0059	91.4663	21.5383	25.0074	50.4108
Tb927.10.12510	97.0043	122.154	36.7259	65.1389	106.707	43.3303	134.69	120.414	91.4663	154.032	105.801	85.6984
Tb927.7.4020	50.9684	45.8079	69.8977	22.2426	37.4534	43.3303	47.6456	57.3994	91.4663	51.5614	55.7858	85.6984
Tb927.11.9440	36.9932	37.0826	60.42	38.1301	32.5067	43.3303	92.5423	86.0992	91.4663	122.05	95.5412	129.388
Tb927.11.3030	28.7725	47.9892	21.3247	38.1301	43.8134	41.8614	116.365	112.303	91.4663	146.199	95.5412	99.1413
Tb927.2.2090	25.4842	15.2693	33.1718	27.8032	25.44	41.127	55.8919	71.1254	91.4663	46.34	75.0223	75.6162
Tb927.7.2830	91.2498	85.0718	35.5412	105.652	69.2535	39.6582	147.518	90.4665	91.4663	133.146	146.197	99.1413
Tb927.3.2950	33.7049	19.632	58.0506	29.3919	35.3334	39.6582	98.0399	72.9971	91.4663	66.5729	64.1216	65.5341
Tb927.9.7720	53.4346	21.8133	63.9741	34.1582	21.9067	38.9238	84.296	84.2274	91.4663	65.9203	60.2743	63.8537
Tb927.4.1950	17.2635	43.6266	28.4329	38.1301	25.44	37.455	93.4586	72.9971	91.4663	78.9738	67.9689	84.0181
Tb927.8.1510	46.036	61.0772	46.2035	36.5413	45.9334	34.5173	112.7	92.3382	91.4663	67.8783	53.2209	92.4199
Tb927.10.3000	23.8401	34.9012	21.3247	23.0369	21.2	31.5797	59.557	68.6298	91.4663	80.9318	94.2587	142.831
Tb927.2.4510	23.018	19.632	33.1718	21.4482	14.84	30.1109	80.6309	87.347	91.4663	82.8898	80.152	58.8126
Tb927.11.5700	19.7297	10.9066	20.14	22.2426	19.08	29.3765	81.5472	76.1167	91.4663	71.1417	85.9229	63.8537
Tb927.7.3050	30.4166	26.1759	21.3247	23.0369	16.2534	28.642	77.8822	80.484	91.4663	82.8898	87.2054	120.986
Tb927.9.5150	33.7049	65.4398	37.9106	39.7188	53.7068	27.1732	118.198	104.192	91.4663	106.386	105.801	60.493
Tb927.10.12540	24.6621	10.9066	30.8024	20.6538	14.1334	25.7044	96.2074	63.0146	91.4663	60.0462	55.7858	68.8948
Tb927.10.3630	22.1959	15.2693	9.47765	30.1863	16.96	24.97	54.0594	54.2799	91.4663	49.6034	66.6864	75.6162
Tb927.8.7730	90.4278	41.4452	43.8341	32.5695	31.0934	22.0323	186.917	109.184	91.4663	98.5541	67.3277	26.8858
Tb927.11.3705	47.6801	28.3573	22.5094	33.3638	34.6267	22.0323	32.9854	30.5714	91.4663	46.34	33.3432	132.749
Tb927.10.12720	19.7297	19.632	20.14	24.6257	15.5467	20.5635	44.8968	67.382	91.4663	60.6989	108.365	85.6984
Tb927.11.17040	54.2567	87.2531	33.1718	14.2988	33.9201	18.3603	161.262	117.918	91.4663	108.344	67.3277	89.0591
Tb927.11.4630	12.3311	15.2693	13.0318	13.5044	13.4267	18.3603	58.6407	58.6473	91.4663	43.0766	45.5263	63.8537
Tb927.1.2600	54.2567	21.8133	41.4647	17.4763	17.6667	16.157	95.2911	65.5102	91.4663	31.3284	31.4196	43.6894
Tb927.7.2350	17.2635	13.088	13.0318	9.53252	11.3067	13.9538	107.203	82.3557	91.4663	67.8783	73.7398	42.009
Tb11.v5.0784.1	39.4594	58.8959	11.8471	41.3076	29.6801	12.485	91.6261	100.449	91.4663	66.5729	55.7858	77.2966
Tb927.9.6090	4.11035	37.0826	11.8471	1.58875	28.2667	11.7506	91.6261	116.047	91.4663	128.577	125.037	78.977
Tb927.6.4210	51.7905	76.3465	28.4329	32.5695	36.0401	9.54735	130.109	124.781	91.4663	87.4586	77.5871	67.2144
Tb927.7.2320	28.7725	13.088	28.4329	11.1213	14.84	9.54735	87.0448	54.9038	91.4663	39.8132	57.7094	21.8447
Tb11.v5.0687.1	13.1531	15.2693	8.29294	22.2426	16.96	6.6097	55.8919	34.9388	91.4663	62.0042	60.2743	50.4108
Tb927.11.10610	11.509	0	7.10824	6.35501	3.53334	4.40647	49.4781	56.7755	91.4663	53.5194	40.3966	50.4108
Tb927.10.5820	7.39864	10.9066	0	10.3269	7.06668	2.20323	87.961	103.569	91.4663	71.1417	85.2817	77.2966
Tb927.5.4380	55.0787	17.4506	87.6683	120.745	92.5735	185.806	78.7984	72.3732	89.121	119.44	126.32	132.749
Tb927.5.3350	59.1891	80.7091	133.872	77.0546	74.2001	160.102	94.3749	94.8339	89.121	106.386	82.0756	89.0591
Tb927.10.12660	60.0112	30.5386	81.7447	46.0739	55.8268	134.397	76.9659	64.2624	89.121	92.0273	92.3351	124.347
Tb927.11.5400	77.2746	61.0772	97.1459	68.3164	90.4535	113.834	108.119	79.8601	89.121	108.997	91.6939	89.0591
Tb927.3.2890	147.151	67.6212	104.254	157.287	89.7468	112.365	98.9562	89.2187	89.121	92.68	69.2513	52.0912
Tb927.7.7410	93.7161	65.4398	87.6683	81.0264	72.0801	95.4735	108.119	105.44	89.121	88.7639	78.8695	60.493
Tb927.11.14120	91.2498	82.8905	52.1271	113.596	112.36	88.1294	169.508	107.936	89.121	146.199	125.678	77.2966
Tb11.v5.0636.1	84.6733	45.8079	60.42	97.7084	60.0668	85.9261	71.4683	71.1254	89.121	67.8783	81.4344	89.0591
Tb927.2.4850	69.876	98.1598	54.4965	48.457	78.4401	85.9261	128.277	119.166	89.121	110.955	107.083	85.6984
Tb927.9.9820	54.2567	102.522	75.8212	61.9614	65.7201	82.2541	91.6261	69.8776	89.121	86.8059	83.3581	70.5752
Tb927.10.3520	53.4346	67.6212	65.1588	65.1389	65.7201	77.1132	114.533	90.4665	89.121	120.092	107.083	107.543
Tb927.7.3370	123.311	82.8905	99.5153	80.2321	53.0001	74.91	136.523	92.3382	89.121	113.566	122.472	119.306
Tb927.3.1210	48.5022	34.9012	72.2671	52.4289	39.5734	73.4411	96.2074	83.6035	89.121	122.05	101.312	115.945
Tb927.11.6420	55.9008	56.7145	55.6812	65.9333	63.6001	72.7067	87.961	71.1254	89.121	101.817	87.8466	97.4609
Tb927.10.1490	59.1891	58.8959	104.254	48.457	48.7601	65.3626	110.868	91.0904	89.121	79.6265	70.5337	87.3788
Tb927.7.6220	57.5449	37.0826	74.6365	57.9895	50.1734	65.3626	58.6407	55.5277	89.121	78.9738	71.175	114.265
Tb927.3.5060	47.6801	30.5386	79.3753	42.8964	62.8935	65.3626	104.454	87.347	89.121	123.356	116.701	70.5752
Tb927.8.1570	43.5697	34.9012	68.713	33.3638	40.2801	64.6282	65.9708	77.9884	89.121	85.5005	64.7628	87.3788
Tb927.3.5010	68.2319	54.5332	56.8659	65.9333	53.0001	58.7529	102.621	72.3732	89.121	92.0273	93.6175	89.0591
Tb927.6.2460	45.2139	26.1759	60.42	46.0739	36.0401	58.7529	110.868	102.945	89.121	90.0693	83.3581	92.4199
Tb927.11.6720	37.8153	39.2639	73.4518	40.5132	51.5868	57.2841	95.2911	106.688	89.121	107.692	86.5641	67.2144
Tb927.11.11850	34.527	30.5386	52.1271	50.8401	32.5067	56.5497	129.193	104.816	89.121	124.008	103.877	95.7806
Tb927.11.3280	45.2139	28.3573	55.6812	40.5132	43.1067	55.8153	87.0448	80.484	89.121	95.2907	82.0756	134.429
Tb927.5.1700	25.4842	39.2639	23.6941	31.7751	36.7467	55.8153	60.4732	70.5015	89.121	60.0462	78.8695	73.9359
Tb927.10.8030	55.0787	56.7145	49.7577	45.2795	62.8935	51.4088	66.887	73.621	89.121	71.7943	79.5108	84.0181
Tb927.8.1790	58.367	71.9838	40.28	55.6064	55.8268	49.94	75.1334	92.3382	89.121	68.531	72.4574	104.182
Tb927.6.2200	60.8332	95.9784	93.5918	43.6907	51.5868	47.7367	62.3057	59.8951	89.121	57.4355	41.0378	78.977
Tb927.8.6350	21.3738	10.9066	61.6047	19.065	20.4934	47.7367	54.0594	45.5452	89.121	70.489	54.5033	119.306
Tb927.1.1880	32.0608	10.9066	52.1271	34.1582	34.6267	46.2679	60.4732	53.0321	89.121	66.5729	64.1216	75.6162
Tb927.11.2280	24.6621	26.1759	41.4647	27.0088	28.9734	43.3303	77.8822	71.7493	89.121	68.531	89.129	95.7806
Tb927.11.8470	28.7725	15.2693	63.9741	46.8682	45.9334	41.127	23.8228	49.9126	89.121	37.8552	67.3277	110.904
Tb927.7.4240	46.858	43.6266	52.1271	54.0176	44.5201	39.6582	47.6456	53.0321	89.121	56.1301	67.3277	52.0912
Tb927.11.2320	25.4842	4.36266	30.8024	22.2426	16.2534	39.6582	52.2269	84.8514	89.121	75.7104	79.5108	80.6573
Tb927.11.11490.1	0.822071	2.18133	1.18471	14.2988	28.9734	35.9862	65.9708	51.1604	89.121	46.34	46.1675	47.0501
Tb927.7.860	25.4842	13.088	68.713	19.065	21.2	35.2517	74.2171	82.3557	89.121	66.5729	67.9689	90.7395
Tb11.v5.0810.1	24.6621	21.8133	26.0635	27.0088	25.44	35.2517	96.2074	69.8776	89.121	85.5005	69.8925	80.6573
Tb927.6.1480	10.6869	23.9946	26.0635	36.5413	24.7334	33.7829	99.8724	102.945	89.121	97.2487	112.213	107.543
Tb927.6.410	31.2387	23.9946	33.1718	12.71	16.2534	33.0485	59.557	59.8951	89.121	50.256	57.0682	26.8858
Tb927.11.10670	36.1711	23.9946	40.28	32.5695	16.96	32.3141	79.7147	61.7668	89.121	73.0997	72.4574	117.625
Tb927.10.8050	67.4098	41.4452	97.1459	9.53252	31.8001	31.5797	71.4683	66.758	89.121	39.1606	41.679	77.2966
Tb927.9.9810	31.2387	34.9012	47.3882	19.065	31.0934	31.5797	133.774	109.184	89.121	121.398	107.083	62.1734
Tb927.7.6290	27.1283	15.2693	50.9424	25.4201	16.96	28.642	66.887	57.3994	89.121	82.8898	83.3581	62.1734
Tb927.9.7770	159.482	128.698	99.5153	37.3357	45.9334	27.1732	131.942	114.175	89.121	54.8248	38.473	43.6894
Tb927.7.6830	74.8084	106.885	42.6494	30.9807	30.3867	27.1732	121.863	86.7231	89.121	82.8898	55.1446	62.1734
Tb927.11.4910	37.8153	67.6212	31.9871	39.7188	57.2401	26.4388	116.365	85.4753	89.121	125.314	95.5412	87.3788
Tb927.11.5770	14.7973	23.9946	22.5094	22.2426	12.0134	26.4388	64.1383	94.8339	89.121	87.4586	84.6405	104.182
Tb927.9.12090	24.6621	26.1759	18.9553	28.5976	36.7467	25.7044	111.784	100.449	89.121	111.608	90.4114	102.502
Tb927.8.6010	87.1395	91.6158	20.14	83.4096	58.6534	23.5012	331.686	222.111	89.121	270.86	177.617	159.634
Tb927.11.8950	30.4166	8.72531	42.6494	30.1863	23.32	22.7668	82.4635	66.1341	89.121	94.638	83.3581	90.7395
Tb927.7.7040	56.7229	85.0718	34.3565	37.3357	46.6401	22.0323	122.779	107.312	89.121	103.775	104.518	82.3377
Tb927.11.6860	0	0	0	17.4763	15.5467	19.8291	49.4781	77.3645	89.121	40.4659	43.6027	68.8948
Tb927.9.13680	39.4594	41.4452	39.0953	28.5976	40.2801	18.3603	105.37	84.8514	89.121	97.2487	80.152	58.8126
Tb927.6.4100	18.9076	15.2693	26.0635	6.35501	9.89335	16.157	54.0594	69.8776	89.121	53.5194	81.4344	52.0912
Tb927.4.1630	26.3063	28.3573	20.14	21.4482	32.5067	15.4226	77.8822	77.9884	89.121	72.447	98.106	82.3377
Tb927.7.1300	55.9008	67.6212	30.8024	40.5132	56.5334	13.9538	123.695	109.808	89.121	92.0273	98.106	78.977
Tb927.3.2170	31.2387	30.5386	14.2165	30.9807	27.5601	13.9538	88.8773	89.2187	89.121	93.9853	121.19	85.6984
Tb927.9.9370	13.1531	8.72531	37.9106	7.14939	8.48002	10.2818	34.8179	42.4257	89.121	26.7597	28.2135	92.4199
Tb927.8.1720	26.3063	21.8133	10.6624	17.4763	19.7867	8.81294	82.4635	82.9796	89.121	92.0273	75.0223	92.4199
Tb927.1.3390	9.86485	2.18133	21.3247	3.97188	13.4267	8.81294	15.5764	20.5889	89.121	13.7062	19.2365	21.8447
Tb927.8.790	9.04278	10.9066	15.4012	7.94377	2.12	8.07852	70.5521	77.9884	89.121	50.256	44.2439	47.0501
Tb927.11.3260	6.57657	2.18133	7.10824	11.1213	5.65334	7.34411	81.5472	81.1079	89.121	100.512	83.9993	105.863
Tb927.8.8170	4.93242	6.54398	3.55412	9.53252	9.18668	7.34411	76.0496	76.1167	89.121	60.6989	59.6331	68.8948
Tb927.11.10720	13.1531	8.72531	7.10824	10.3269	7.06668	5.14088	66.887	79.2362	89.121	86.8059	75.6635	60.493
Tb927.10.5850	9.04278	21.8133	5.92353	11.1213	10.6	2.20323	67.8033	110.432	89.121	118.787	128.884	100.822
Tb927.9.4750	0.822071	0	1.18471	5.56064	7.77335	0.734411	78.7984	69.2537	89.121	64.6149	71.175	84.0181
Tb927.11.13730	159.482	106.885	246.419	119.157	112.36	200.494	163.094	99.2012	86.7757	135.104	79.5108	67.2144
Tb927.10.13720	88.7836	98.1598	159.935	106.447	114.48	146.882	94.3749	71.7493	86.7757	77.6684	96.1824	107.543
Tb927.3.5340	101.937	172.325	87.6683	80.2321	114.48	99.8799	153.016	122.91	86.7757	121.398	136.579	134.429
Tb927.9.6130	104.403	58.8959	87.6683	145.371	93.9868	96.2079	93.4586	74.2449	86.7757	113.566	76.3047	95.7806
Tb927.9.14220	90.4278	95.9784	100.7	73.0827	85.5068	89.5982	120.946	101.697	86.7757	129.882	105.159	107.543
Tb927.4.2750	73.9864	52.3519	78.1906	57.9895	60.7734	79.3164	59.557	56.1516	86.7757	71.7943	64.1216	65.5341
Tb927.10.11140	37.8153	15.2693	68.713	21.4482	57.9468	74.1755	98.9562	87.347	86.7757	84.8479	92.9763	65.5341
Tb927.5.2320	80.5629	95.9784	90.0377	84.2039	64.3068	73.4411	101.705	103.569	86.7757	97.9014	67.9689	109.223
Tb927.7.1920	68.2319	41.4452	80.56	64.3445	37.4534	71.2379	98.0399	63.6385	86.7757	88.7639	76.3047	89.0591
Tb927.6.4710	41.9256	17.4506	49.7577	45.2795	52.2934	68.3003	69.6358	63.0146	86.7757	63.3096	62.1979	57.1323
Tb927.10.3500	24.6621	41.4452	43.8341	40.5132	26.8534	65.3626	100.789	93.586	86.7757	104.428	102.595	102.502
Tb927.11.550	52.6125	74.1652	67.5282	30.9807	39.5734	63.1594	106.286	108.56	86.7757	103.123	102.595	115.945
Tb11.v5.0198.1	65.7657	52.3519	71.0824	69.1108	54.4134	59.4873	84.296	68.6298	86.7757	108.997	85.9229	70.5752
Tb927.10.5380	55.0787	39.2639	55.6812	50.0457	43.1067	59.4873	101.705	112.303	86.7757	101.817	92.9763	68.8948
Tb927.11.1250	43.5697	39.2639	54.4965	35.747	33.9201	59.4873	87.961	78.6123	86.7757	95.9434	76.3047	70.5752
Tb927.11.16470	27.1283	21.8133	27.2482	19.8594	21.2	49.94	61.3895	49.2887	86.7757	67.2256	66.6864	115.945
Tb927.11.15970	22.1959	13.088	31.9871	21.4482	23.32	49.94	68.7196	68.0059	86.7757	73.0997	72.4574	107.543
Tb927.4.1270	84.6733	91.6158	29.6177	104.858	81.9735	48.4711	114.533	87.347	86.7757	123.356	128.884	90.7395
Tb927.10.11780	61.6553	43.6266	63.9741	37.3357	20.4934	48.4711	102.621	67.382	86.7757	65.2676	97.4648	94.1002
Tb927.8.5070	41.1035	67.6212	37.9106	41.3076	43.8134	47.0023	118.198	111.679	86.7757	109.65	91.6939	80.6573
Tb927.10.1630	43.5697	71.9838	26.0635	48.457	67.8401	46.2679	136.523	102.321	86.7757	95.9434	93.6175	82.3377
Tb927.11.7780	57.5449	102.522	47.3882	34.9526	58.6534	45.5335	149.351	116.047	86.7757	125.966	101.953	72.2555
Tb927.11.6050	50.9684	19.632	42.6494	50.8401	28.9734	44.0647	99.8724	90.4665	86.7757	105.081	95.5412	107.543
Tb927.11.6410	22.1959	8.72531	16.5859	27.8032	15.5467	41.127	77.8822	87.347	86.7757	92.68	125.037	122.666
Tb927.1.750	38.6373	28.3573	37.9106	29.3919	21.2	39.6582	80.6309	71.1254	86.7757	79.6265	78.8695	75.6162
Tb927.2.4060	50.9684	43.6266	62.7894	49.2514	45.2268	38.9238	104.454	70.5015	86.7757	85.5005	94.8999	72.2555
Tb927.7.2900	85.4954	47.9892	31.9871	104.858	60.7734	38.1894	130.109	97.3295	86.7757	142.283	139.144	104.182
Tb927.9.11030	30.4166	17.4506	30.8024	30.9807	12.72	38.1894	54.9756	52.4082	86.7757	56.1301	57.0682	78.977
Tb927.3.5350	75.6305	26.1759	47.3882	30.1863	39.5734	35.9862	128.277	114.799	86.7757	105.081	73.0986	60.493
Tb927.8.4880	34.527	34.9012	17.7706	32.5695	33.9201	32.3141	91.6261	96.0817	86.7757	102.47	78.2283	124.347
Tb927.7.6820	18.0856	23.9946	31.9871	19.065	21.9067	31.5797	46.7293	54.9038	86.7757	39.8132	28.2135	75.6162
Tb927.9.9670	50.1463	41.4452	23.6941	50.0457	30.3867	30.1109	89.7936	61.1429	86.7757	66.5729	61.5567	87.3788
Tb927.11.14440	28.7725	10.9066	36.7259	26.2144	23.32	29.3765	59.557	70.5015	86.7757	62.6569	55.1446	57.1323
Tb927.10.9970	23.018	28.3573	34.3565	33.3638	19.7867	29.3765	86.1285	86.7231	86.7757	82.8898	81.4344	90.7395
Tb927.11.4200	33.7049	82.8905	24.8788	57.9895	49.4668	28.642	106.286	122.91	86.7757	138.367	100.03	58.8126
Tb927.6.740	18.0856	6.54398	37.9106	27.8032	14.84	27.9076	52.2269	65.5102	86.7757	77.6684	72.4574	107.543
Tb927.11.14560	30.4166	37.0826	31.9871	42.102	35.3334	27.1732	128.277	96.7056	86.7757	108.344	100.671	102.502
Tb927.7.650	35.349	37.0826	24.8788	46.0739	45.2268	25.7044	134.69	107.312	86.7757	124.008	108.365	110.904
Tb927.6.400	20.5518	37.0826	39.0953	38.9245	23.32	25.7044	87.961	91.7143	86.7757	74.405	78.2283	78.977
Tb927.10.7630	16.4414	19.632	27.2482	20.6538	25.44	25.7044	54.9756	65.5102	86.7757	51.5614	62.8392	72.2555
Tb927.5.570	13.1531	10.9066	24.8788	24.6257	16.96	25.7044	96.2074	96.7056	86.7757	97.9014	112.213	104.182
Tb927.11.10230	27.1283	28.3573	18.9553	33.3638	21.2	24.97	63.222	70.5015	86.7757	60.6989	71.175	75.6162
Tb927.7.6340	25.4842	15.2693	18.9553	25.4201	19.08	23.5012	72.3846	57.3994	86.7757	90.7219	97.4648	117.625
Tb927.7.5280	27.1283	15.2693	18.9553	21.4482	20.4934	22.0323	58.6407	89.8426	86.7757	92.0273	96.1824	92.4199
Tb927.10.6220	16.4414	26.1759	15.4012	34.1582	15.5467	21.2979	95.2911	69.8776	86.7757	84.1952	68.6101	72.2555
Tb927.10.9670	27.1283	17.4506	17.7706	27.0088	13.4267	20.5635	76.0496	64.8863	86.7757	73.7524	85.2817	57.1323
Tb927.8.2390	17.2635	19.632	24.8788	14.2988	17.6667	19.8291	75.1334	65.5102	86.7757	84.1952	75.6635	72.2555
Tb927.8.6690	9.04278	15.2693	18.9553	23.0369	11.3067	19.8291	82.4635	72.3732	86.7757	75.0577	80.7932	97.4609
Tb927.8.6260	9.04278	15.2693	7.10824	10.3269	10.6	19.0947	45.813	48.0408	86.7757	58.0882	85.9229	84.0181
Tb927.10.15400	27.9504	13.088	47.3882	11.1213	18.3734	15.4226	69.6358	70.5015	86.7757	40.4659	59.6331	73.9359
Tb927.11.11770	17.2635	34.9012	26.0635	22.2426	36.7467	15.4226	85.2123	72.3732	86.7757	50.256	61.5567	77.2966
Tb927.9.6060	23.8401	19.632	10.6624	24.6257	16.96	14.6882	80.6309	85.4753	86.7757	71.1417	76.9459	57.1323
Tb927.10.9000	10.6869	6.54398	21.3247	8.73815	4.94668	14.6882	62.3057	69.8776	86.7757	55.4774	56.427	55.4519
Tb927.5.2330	12.3311	4.36266	14.2165	20.6538	8.48002	12.485	58.6407	71.1254	86.7757	83.5425	78.2283	80.6573
Tb927.9.12500	21.3738	23.9946	23.6941	3.97188	9.18668	11.7506	76.0496	79.2362	86.7757	46.34	49.3736	84.0181
Tb927.3.4220	17.2635	15.2693	13.0318	16.6819	21.2	11.0162	41.2317	61.1429	86.7757	64.6149	58.9919	72.2555
Tb927.11.14930	12.3311	15.2693	11.8471	11.9157	8.48002	11.0162	66.887	63.6385	86.7757	70.489	66.6864	84.0181
Tb927.5.860	10.6869	10.9066	9.47765	4.76626	14.84	8.81294	89.7936	84.2274	86.7757	86.1532	83.3581	95.7806
Tb927.8.5790	0	0	1.18471	22.2426	9.89335	7.34411	71.4683	53.0321	86.7757	73.0997	50.0148	65.5341
Tb927.11.14100	58.367	69.8025	74.6365	97.7084	101.054	157.164	112.7	103.569	84.4304	116.829	140.426	131.068
Tb927.9.12110	78.0967	98.1598	77.0059	123.128	128.614	127.053	80.6309	61.7668	84.4304	116.176	78.8695	73.9359
Tb927.5.2960	116.734	45.8079	164.674	95.3252	106	121.912	103.537	79.2362	84.4304	99.2067	91.6939	77.2966
Tb927.10.2240	152.905	71.9838	81.7447	133.455	114.48	103.552	130.109	72.9971	84.4304	102.47	109.648	144.511
Tb927.7.1580	64.1215	41.4452	66.3435	53.2233	55.8268	98.4111	72.3846	75.4927	84.4304	78.3211	71.8162	67.2144
Tb927.11.2270	64.9436	34.9012	81.7447	65.9333	53.0001	91.067	53.1431	66.758	84.4304	66.5729	55.7858	63.8537
Tb927.10.13130	60.8332	23.9946	93.5918	51.6345	38.8667	86.6605	61.3895	54.2799	84.4304	105.081	67.9689	78.977
Tb927.7.6910	86.3174	52.3519	91.2224	84.2039	69.9601	71.9723	70.5521	49.9126	84.4304	66.5729	73.0986	129.388
Tb927.7.3880	40.2815	8.72531	55.6812	33.3638	27.5601	70.5035	92.5423	94.21	84.4304	94.638	82.0756	75.6162
Tb927.9.12070	51.7905	37.0826	62.7894	61.167	50.8801	63.8938	94.3749	88.5948	84.4304	116.176	96.8236	109.223
Tb927.10.14930	27.9504	41.4452	35.5412	41.3076	39.5734	63.8938	62.3057	77.9884	84.4304	85.5005	78.2283	115.945
Tb11.v5.0837.1	55.0787	91.6158	75.8212	38.9245	54.4134	61.6906	84.296	94.21	84.4304	67.8783	90.4114	110.904
Tb927.4.3510	40.2815	63.2585	56.8659	40.5132	67.8401	58.7529	55.8919	50.5365	84.4304	50.256	57.0682	52.0912
Tb927.10.14500	58.367	41.4452	72.2671	42.102	36.0401	58.0185	64.1383	68.6298	84.4304	56.1301	78.8695	73.9359
Tb927.10.9600	23.018	34.9012	48.5729	19.065	33.9201	50.6744	42.148	52.4082	84.4304	69.1836	58.3506	70.5752
Tb927.10.15720	61.6553	76.3465	61.6047	45.2795	64.3068	49.2056	82.4635	68.6298	84.4304	81.5845	77.5871	77.2966
Tb927.10.11580	35.349	19.632	35.5412	50.8401	47.3468	49.2056	54.9756	64.8863	84.4304	77.0158	95.5412	78.977
Tb927.11.3710	32.8828	26.1759	58.0506	35.747	40.2801	49.2056	67.8033	54.2799	84.4304	75.0577	81.4344	82.3377
Tb927.10.11340	41.9256	41.4452	30.8024	56.4008	36.0401	47.7367	104.454	90.4665	84.4304	124.008	114.778	110.904
Tb927.9.7180	43.5697	28.3573	59.2353	38.1301	37.4534	42.5959	109.035	102.321	84.4304	116.829	126.32	109.223
Tb927.9.8450	48.5022	47.9892	59.2353	43.6907	27.5601	40.3926	78.7984	68.0059	84.4304	69.8363	55.7858	50.4108
Tb927.7.1860	30.4166	52.3519	37.9106	30.9807	53.7068	39.6582	66.887	82.9796	84.4304	82.2372	89.129	107.543
Tb927.11.12220	19.7297	21.8133	42.6494	31.7751	30.3867	37.455	74.2171	70.5015	84.4304	73.0997	54.5033	50.4108
Tb11.v5.0572.1	28.7725	8.72531	26.0635	33.3638	26.8534	35.2517	64.1383	66.1341	84.4304	75.7104	73.0986	68.8948
Tb927.7.760	27.1283	21.8133	43.8341	21.4482	23.32	35.2517	66.887	54.2799	84.4304	57.4355	81.4344	73.9359
Tb927.10.830	97.8264	30.5386	75.8212	21.4482	27.5601	34.5173	56.8082	51.7843	84.4304	32.6338	42.9615	87.3788
Tb927.7.2820	84.6733	69.8025	27.2482	93.7365	60.0668	34.5173	120.03	104.816	84.4304	136.409	154.533	112.584
Tb927.9.8400	17.2635	13.088	29.6177	30.1863	29.6801	32.3141	66.887	76.7406	84.4304	89.4166	94.8999	85.6984
Tb927.2.3020	26.3063	17.4506	21.3247	21.4482	21.9067	30.8453	37.5667	46.793	84.4304	43.7293	58.3506	38.6483
Tb927.10.9650	29.5945	21.8133	29.6177	33.3638	23.32	30.1109	73.3009	63.0146	84.4304	78.9738	68.6101	97.4609
Tb927.11.4660	19.7297	19.632	16.5859	22.2426	22.6134	30.1109	58.6407	74.8688	84.4304	69.8363	71.175	62.1734
Tb11.v5.0847.1	14.7973	13.088	18.9553	25.4201	30.3867	29.3765	65.9708	80.484	84.4304	77.0158	76.3047	80.6573
Tb11.v5.0748.1	17.2635	26.1759	27.2482	14.2988	29.6801	28.642	98.9562	96.7056	84.4304	91.3746	96.1824	80.6573
Tb927.10.13330	18.9076	23.9946	21.3247	27.0088	9.89335	27.1732	51.3106	49.9126	84.4304	82.2372	69.8925	63.8537
Tb927.10.5950	52.6125	39.2639	37.9106	26.2144	20.4934	25.7044	88.8773	78.6123	84.4304	70.489	71.175	57.1323
Tb927.6.4750	20.5518	41.4452	27.2482	26.2144	25.44	25.7044	82.4635	62.3907	84.4304	65.9203	58.3506	55.4519
Tb927.11.9120	50.9684	56.7145	43.8341	23.8313	29.6801	23.5012	76.9659	81.1079	84.4304	67.2256	66.0452	57.1323
Tb927.11.9890	32.8828	19.632	29.6177	34.9526	34.6267	23.5012	107.203	82.9796	84.4304	109.65	104.518	84.0181
Tb927.7.1420	22.1959	17.4506	13.0318	34.1582	21.9067	21.2979	65.9708	79.2362	84.4304	88.7639	113.495	85.6984
Tb927.7.4000	24.6621	26.1759	23.6941	15.8875	17.6667	20.5635	78.7984	54.2799	84.4304	48.9507	50.6561	53.7716
Tb927.11.14840	18.9076	0	22.5094	7.94377	4.94668	19.8291	75.1334	72.9971	84.4304	45.0346	47.45	47.0501
Tb927.10.5670	17.2635	58.8959	16.5859	30.1863	44.5201	19.8291	98.9562	68.0059	84.4304	96.596	90.4114	53.7716
Tb927.5.2140	12.3311	17.4506	10.6624	13.5044	19.08	19.0947	77.8822	75.4927	84.4304	97.2487	76.3047	72.2555
Tb927.6.4130	27.1283	43.6266	60.42	15.0932	36.0401	18.3603	59.557	69.2537	84.4304	43.7293	42.9615	55.4519
Tb927.7.670	14.7973	6.54398	15.4012	13.5044	6.36001	16.8915	35.7342	45.5452	84.4304	59.3935	58.9919	47.0501
Tb927.1.4490	17.2635	39.2639	10.6624	28.5976	26.1467	16.157	71.4683	78.6123	84.4304	84.1952	66.0452	63.8537
Tb927.11.4510	7.39864	4.36266	10.6624	15.8875	6.36001	16.157	87.0448	76.1167	84.4304	75.0577	81.4344	80.6573
Tb927.5.670	13.1531	10.9066	11.8471	5.56064	9.89335	13.9538	67.8033	66.758	84.4304	54.8248	66.6864	89.0591
Tb927.11.3140	17.2635	19.632	23.6941	18.2707	11.3067	11.0162	76.9659	62.3907	84.4304	65.9203	42.9615	70.5752
Tb11.v5.0317.1	0.822071	0	0	0	0	0	5.49756	1.87172	84.4304	2.6107	4.48851	68.8948
Tb927.7.6190	53.4346	39.2639	72.2671	102.475	81.9735	181.4	56.8082	59.2712	82.0851	130.535	116.06	201.643
Tb927.10.2380	100.293	50.1705	106.624	89.7646	53.7068	135.866	81.5472	64.2624	82.0851	112.26	73.7398	95.7806
Tb927.10.10850	129.887	100.341	162.305	96.1196	111.654	129.256	111.784	77.9884	82.0851	99.2067	84.6405	78.977
Tb927.8.4430	68.2319	126.517	93.5918	73.0827	77.7335	103.552	65.9708	78.6123	82.0851	81.5845	69.2513	109.223
Tb927.10.10520	115.09	174.506	62.7894	81.0264	115.187	96.2079	80.6309	64.8863	82.0851	78.3211	94.8999	92.4199
Tb927.9.12730	43.5697	93.7971	75.8212	42.102	84.0935	92.5358	120.03	94.21	82.0851	97.9014	84.6405	78.977
Tb927.4.4350	68.2319	65.4398	103.069	84.9983	87.6268	88.8638	112.7	89.8426	82.0851	102.47	80.7932	102.502
Tb927.4.3890	97.8264	76.3465	123.209	50.0457	64.3068	72.7067	116.365	93.586	82.0851	80.2791	76.3047	67.2144
Tb927.10.5170	27.9504	23.9946	42.6494	30.9807	27.5601	66.097	60.4732	64.2624	82.0851	63.9622	65.404	78.977
Tb927.6.3100	58.367	65.4398	58.0506	50.8401	105.294	65.3626	84.296	58.0234	82.0851	58.0882	62.8392	60.493
Tb927.10.6640	47.6801	61.0772	45.0188	59.5783	72.7868	65.3626	89.7936	79.2362	82.0851	95.2907	70.5337	42.009
Tb927.10.11300	127.421	78.5278	77.0059	102.475	47.3468	63.8938	61.3895	75.4927	82.0851	54.1721	51.2973	112.584
Tb927.10.10050	28.7725	43.6266	48.5729	47.6626	81.9735	63.8938	109.951	112.303	82.0851	178.833	161.586	87.3788
Tb927.11.11080	65.7657	76.3465	73.4518	54.0176	67.1335	62.425	76.9659	82.3557	82.0851	88.7639	83.9993	85.6984
Tb927.5.2410	28.7725	30.5386	68.713	24.6257	30.3867	58.0185	75.1334	51.7843	82.0851	69.1836	65.404	73.9359
Tb927.2.4200	49.3242	15.2693	73.4518	54.0176	34.6267	53.612	53.1431	52.4082	82.0851	78.3211	82.7168	97.4609
Tb927.4.2140	26.3063	19.632	35.5412	42.102	25.44	52.8776	89.7936	80.484	82.0851	88.1112	94.2587	90.7395
Tb927.9.11330	50.9684	56.7145	58.0506	62.7558	77.7335	52.1432	55.8919	58.6473	82.0851	65.2676	78.8695	87.3788
Tb927.10.14010	55.0787	52.3519	48.5729	50.0457	59.3601	49.2056	104.454	90.4665	82.0851	118.787	123.755	90.7395
Tb927.1.3560	53.4346	19.632	31.9871	57.1951	47.3468	47.0023	81.5472	67.382	82.0851	77.6684	78.2283	89.0591
Tb927.11.14410	42.7477	23.9946	43.8341	38.1301	29.6801	47.0023	63.222	67.382	82.0851	48.9507	69.2513	55.4519
Tb927.6.2690	45.2139	45.8079	50.9424	45.2795	44.5201	46.2679	85.2123	86.7231	82.0851	79.6265	98.7472	73.9359
Tb927.11.6320	40.2815	41.4452	41.4647	40.5132	35.3334	45.5335	70.5521	74.8688	82.0851	86.8059	70.5337	58.8126
Tb927.11.2950	52.6125	43.6266	37.9106	57.9895	55.8268	44.0647	72.3846	74.2449	82.0851	78.3211	69.2513	102.502
Tb927.11.15120	34.527	19.632	33.1718	31.7751	31.0934	41.127	48.5618	54.9038	82.0851	62.0042	85.2817	63.8537
Tb927.5.4310	18.0856	34.9012	30.8024	27.8032	27.5601	38.9238	91.6261	66.758	82.0851	90.7219	83.9993	67.2144
Tb927.8.6270	28.7725	30.5386	36.7259	52.4289	48.0534	38.1894	67.8033	69.8776	82.0851	78.9738	91.6939	63.8537
Tb927.10.5930	77.2746	37.0826	66.3435	51.6345	62.1868	37.455	101.705	89.2187	82.0851	67.8783	59.6331	45.3697
Tb927.5.1010	24.6621	13.088	40.28	26.2144	13.4267	35.2517	56.8082	63.0146	82.0851	88.1112	83.3581	72.2555
Tb927.11.10280	19.7297	8.72531	17.7706	23.8313	18.3734	34.5173	61.3895	52.4082	82.0851	67.8783	88.4878	78.977
Tb927.10.14980	40.2815	54.5332	46.2035	29.3919	23.32	33.7829	97.1236	84.8514	82.0851	68.531	62.1979	95.7806
Tb11.v5.0148.1	27.9504	17.4506	16.5859	27.8032	25.44	33.7829	81.5472	73.621	82.0851	78.3211	76.9459	107.543
Tb927.9.5380	25.4842	15.2693	26.0635	19.8594	24.7334	33.0485	80.6309	76.7406	82.0851	63.3096	75.6635	80.6573
Tb927.10.13600	61.6553	63.2585	47.3882	51.6345	32.5067	32.3141	95.2911	61.7668	82.0851	80.9318	68.6101	52.0912
Tb927.9.1380	68.2319	54.5332	20.14	57.1951	39.5734	30.1109	77.8822	79.8601	82.0851	99.2067	91.6939	80.6573
Tb927.10.2370	47.6801	150.512	33.1718	51.6345	108.12	28.642	108.119	119.79	82.0851	106.386	138.503	104.182
Tb927.5.2290	17.2635	30.5386	11.8471	28.5976	34.6267	27.9076	78.7984	87.9709	82.0851	107.692	101.312	92.4199
Tb927.11.3910	9.86485	21.8133	29.6177	16.6819	17.6667	27.9076	62.3057	71.1254	82.0851	59.3935	56.427	73.9359
Tb927.11.6210	69.0539	102.522	28.4329	37.3357	43.1067	24.2356	127.36	152.857	82.0851	116.829	89.129	62.1734
Tb927.10.14570	34.527	19.632	55.6812	23.8313	19.7867	24.2356	74.2171	76.1167	82.0851	64.6149	74.381	80.6573
Tb927.10.810	27.1283	17.4506	10.6624	15.0932	22.6134	24.2356	52.2269	63.0146	82.0851	54.1721	66.6864	67.2144
Tb927.11.5430	13.9752	6.54398	26.0635	13.5044	11.3067	22.7668	55.8919	63.6385	82.0851	78.9738	60.9155	68.8948
Tb927.4.2880	24.6621	52.3519	22.5094	27.0088	27.5601	22.0323	118.198	92.9621	82.0851	97.9014	87.2054	87.3788
Tb927.11.11620	22.1959	19.632	18.9553	16.6819	18.3734	21.2979	82.4635	92.3382	82.0851	96.596	85.9229	82.3377
Tb927.4.2890	32.8828	26.1759	46.2035	34.1582	25.44	20.5635	65.9708	53.656	82.0851	47.6453	53.8621	65.5341
Tb927.4.3930	18.9076	30.5386	34.3565	10.3269	19.7867	19.8291	76.9659	58.0234	82.0851	42.4239	21.1601	53.7716
Tb927.8.6490	44.3918	21.8133	52.1271	8.73815	16.2534	19.0947	73.3009	55.5277	82.0851	48.298	44.8851	52.0912
Tb927.6.170	26.3063	32.7199	15.4012	15.8875	19.7867	19.0947	45.813	64.2624	82.0851	47.6453	50.0148	62.1734
Tb927.7.6410	11.509	6.54398	18.9553	14.2988	16.96	19.0947	77.8822	79.8601	82.0851	58.7408	77.5871	89.0591
Tb927.4.2200	10.6869	8.72531	9.47765	20.6538	12.72	17.6259	72.3846	76.1167	82.0851	77.6684	72.4574	85.6984
Tb927.8.7710	27.1283	17.4506	16.5859	19.065	12.0134	16.8915	75.1334	66.1341	82.0851	69.1836	64.1216	67.2144
Tb927.7.4340	19.7297	17.4506	16.5859	30.1863	28.2667	16.8915	87.0448	79.2362	82.0851	120.092	121.19	90.7395
Tb927.3.2650	23.8401	34.9012	29.6177	25.4201	27.5601	16.157	124.611	114.799	82.0851	75.7104	69.8925	82.3377
Tb927.8.1740	24.6621	21.8133	17.7706	30.1863	22.6134	12.485	99.8724	77.3645	82.0851	116.829	76.9459	67.2144
Tb927.7.6000	39.4594	76.3465	23.6941	19.8594	18.3734	11.0162	127.36	109.808	82.0851	92.68	56.427	62.1734
Tb927.11.5050	20.5518	23.9946	11.8471	13.5044	11.3067	11.0162	47.6456	43.6735	82.0851	65.2676	58.3506	62.1734
Tb927.7.5970	15.6193	61.0772	10.6624	13.5044	19.08	10.2818	131.025	143.499	82.0851	90.0693	66.0452	65.5341
Tb927.10.2630	13.1531	8.72531	14.2165	12.71	17.6667	10.2818	47.6456	57.3994	82.0851	54.8248	50.0148	57.1323
Tb11.v5.0465.1	16.4414	13.088	14.2165	15.8875	12.0134	9.54735	45.813	59.2712	82.0851	53.5194	80.152	63.8537
Tb927.2.2720	5.75449	8.72531	7.10824	9.53252	8.48002	9.54735	40.3155	57.3994	82.0851	52.8667	67.3277	85.6984
Tb927.6.200	48.5022	34.9012	16.5859	8.73815	6.36001	8.81294	77.8822	73.621	82.0851	33.9391	37.1905	45.3697
Tb927.9.1530	4.11035	6.54398	3.55412	7.14939	5.65334	5.14088	61.3895	73.621	82.0851	65.9203	58.9919	92.4199
Tb927.1.2880	9.86485	0	3.55412	1.58875	2.82667	3.67206	35.7342	94.21	82.0851	50.9087	63.4804	104.182
Tb927.8.7670	42.7477	32.7199	9.47765	15.8875	28.2667	2.93765	73.3009	106.064	82.0851	64.6149	69.2513	48.7305
Tb927.11.1540	129.065	54.5332	112.547	101.68	79.8535	124.85	96.2074	92.9621	79.7398	115.524	98.7472	58.8126
Tb927.10.2620	86.3174	106.885	68.713	144.577	101.054	123.381	120.946	59.2712	79.7398	103.775	92.9763	60.493
Tb927.9.8815	96.1823	115.61	90.0377	115.979	82.6802	121.178	66.887	48.6647	79.7398	71.1417	46.8088	77.2966
Tb927.7.4570	239.223	152.693	170.598	45.2795	119.427	110.896	80.6309	83.6035	79.7398	48.9507	36.5493	40.3287
Tb927.10.2270	52.6125	32.7199	66.3435	76.2602	44.5201	94.7391	109.951	82.9796	79.7398	93.9853	110.289	107.543
Tb927.9.2160	60.8332	37.0826	78.1906	57.1951	63.6001	88.8638	43.9805	39.3061	79.7398	42.4239	44.2439	80.6573
Tb927.10.2020	104.403	113.429	100.7	54.0176	77.0268	85.1917	86.1285	94.8339	79.7398	77.6684	67.3277	73.9359
Tb927.6.2210	46.858	39.2639	84.1141	65.9333	50.8801	80.0508	98.0399	104.192	79.7398	129.882	112.854	117.625
Tb927.2.5150	80.5629	52.3519	71.0824	64.3445	66.4268	77.1132	96.2074	72.9971	79.7398	82.8898	84.6405	80.6573
Tb927.10.620	18.0856	10.9066	29.6177	50.0457	55.8268	76.3788	66.887	44.9213	79.7398	127.924	150.686	129.388
Tb927.7.4460	66.5877	71.9838	63.9741	66.7277	57.2401	74.1755	97.1236	79.2362	79.7398	92.68	96.1824	78.977
Tb927.7.3500	61.6553	69.8025	87.6683	44.4851	53.7068	66.8314	46.7293	51.7843	79.7398	60.6989	55.1446	57.1323
Tb927.11.7240	23.8401	23.9946	48.5729	28.5976	38.1601	63.1594	50.3943	38.0583	79.7398	46.9927	78.8695	58.8126
Tb927.11.1840	69.0539	56.7145	54.4965	71.4939	32.5067	62.425	54.0594	45.5452	79.7398	66.5729	72.4574	107.543
Tb927.11.4450	65.7657	47.9892	58.0506	48.457	55.1201	62.425	137.439	102.945	79.7398	95.9434	107.083	68.8948
Tb927.10.9330	50.1463	32.7199	59.2353	28.5976	31.0934	61.6906	55.8919	58.0234	79.7398	63.9622	50.6561	77.2966
Tb927.10.11700	105.225	50.1705	81.7447	61.167	54.4134	60.9561	74.2171	53.656	79.7398	61.3515	42.3202	31.9269
Tb927.11.5300	78.0967	43.6266	62.7894	49.2514	43.8134	60.9561	101.705	91.7143	79.7398	91.3746	94.2587	73.9359
Tb11.v5.0579.1	32.0608	34.9012	54.4965	46.8682	39.5734	58.7529	72.3846	71.7493	79.7398	90.0693	67.9689	45.3697
Tb927.11.12540	38.6373	15.2693	58.0506	34.1582	18.3734	51.4088	75.1334	75.4927	79.7398	72.447	95.5412	100.822
Tb927.5.1520	74.8084	61.0772	52.1271	80.2321	43.8134	49.94	111.784	92.3382	79.7398	114.218	94.8999	99.1413
Tb927.10.6190	48.5022	32.7199	52.1271	54.0176	56.5334	48.4711	69.6358	66.758	79.7398	75.7104	67.9689	57.1323
Tb927.3.3690	33.7049	28.3573	36.7259	41.3076	27.5601	48.4711	97.1236	74.2449	79.7398	101.165	96.1824	139.47
Tb927.11.7820	18.0856	13.088	16.5859	33.3638	33.9201	48.4711	46.7293	61.1429	79.7398	114.871	98.106	117.625
Tb927.11.14210	34.527	34.9012	34.3565	50.8401	32.5067	47.0023	75.1334	72.3732	79.7398	108.997	82.7168	119.306
Tb927.9.12490	23.8401	17.4506	36.7259	25.4201	14.1334	45.5335	74.2171	69.2537	79.7398	95.9434	85.2817	80.6573
Tb927.7.4420	58.367	89.4344	60.42	38.9245	60.0668	44.0647	65.9708	72.3732	79.7398	83.5425	71.175	85.6984
Tb927.8.3100	23.018	39.2639	18.9553	46.8682	46.6401	38.1894	101.705	74.2449	79.7398	80.9318	77.5871	134.429
Tb927.7.6610	37.8153	54.5332	33.1718	44.4851	45.2268	37.455	62.3057	71.1254	79.7398	82.2372	64.7628	60.493
Tb927.9.14120	30.4166	37.0826	23.6941	38.9245	34.6267	36.7206	43.0643	46.1691	79.7398	66.5729	75.0223	115.945
Tb927.2.4930	25.4842	37.0826	40.28	27.8032	34.6267	36.7206	54.9756	46.793	79.7398	56.1301	51.2973	72.2555
Tb927.1.1960	33.7049	45.8079	35.5412	23.0369	18.3734	34.5173	58.6407	69.2537	79.7398	62.0042	85.2817	97.4609
Tb927.6.4640	30.4166	10.9066	35.5412	39.7188	22.6134	33.7829	76.9659	57.3994	79.7398	88.7639	66.6864	87.3788
Tb927.10.14330	25.4842	30.5386	22.5094	40.5132	34.6267	33.7829	106.286	90.4665	79.7398	113.566	86.5641	102.502
Tb11.v5.0838.1	15.6193	19.632	26.0635	29.3919	36.7467	33.0485	58.6407	62.3907	79.7398	76.3631	71.8162	95.7806
Tb927.10.14320	24.6621	37.0826	24.8788	14.2988	30.3867	32.3141	72.3846	74.8688	79.7398	80.2791	78.2283	72.2555
Tb927.11.10120	41.9256	30.5386	33.1718	34.1582	33.9201	30.8453	35.7342	48.6647	79.7398	56.1301	71.8162	80.6573
Tb927.7.6970	22.1959	28.3573	27.2482	27.0088	28.9734	30.8453	36.6504	43.0496	79.7398	33.9391	51.2973	78.977
Tb927.8.3950	20.5518	17.4506	23.6941	16.6819	14.84	30.1109	50.3943	62.3907	79.7398	47.6453	75.6635	104.182
Tb927.4.5060	46.858	45.8079	65.1588	23.0369	26.8534	29.3765	41.2317	37.4344	79.7398	41.1186	23.0838	40.3287
Tb927.2.5870	11.509	4.36266	60.42	9.53252	11.3067	27.9076	43.9805	63.0146	79.7398	48.298	54.5033	82.3377
Tb927.8.2620	26.3063	23.9946	22.5094	35.747	17.6667	25.7044	47.6456	46.1691	79.7398	58.7408	68.6101	60.493
Tb927.10.13820	19.7297	39.2639	24.8788	15.8875	27.5601	23.5012	47.6456	43.6735	79.7398	54.8248	41.679	53.7716
Tb927.7.5350	9.86485	8.72531	22.5094	15.8875	16.2534	23.5012	55.8919	49.2887	79.7398	55.4774	75.6635	99.1413
Tb927.6.1180	9.86485	0	17.7706	21.4482	17.6667	23.5012	51.3106	54.2799	79.7398	45.6873	93.6175	72.2555
Tb927.11.2620	32.8828	10.9066	34.3565	13.5044	17.6667	22.7668	55.8919	74.2449	79.7398	39.8132	42.9615	43.6894
Tb927.9.8670	26.3063	28.3573	28.4329	17.4763	24.7334	22.7668	51.3106	71.7493	79.7398	60.6989	61.5567	80.6573
Tb927.1.2210	26.3063	71.9838	40.28	15.0932	16.96	22.0323	70.5521	86.7231	79.7398	41.1186	31.4196	42.009
Tb927.11.9080	19.7297	17.4506	15.4012	23.8313	17.6667	22.0323	111.784	99.8251	79.7398	129.882	116.06	89.0591
Tb927.10.870	12.3311	8.72531	21.3247	15.0932	15.5467	21.2979	65.9708	66.1341	79.7398	88.1112	102.595	122.666
Tb927.8.5020	47.6801	13.088	34.3565	38.9245	17.6667	19.8291	76.0496	64.2624	79.7398	61.3515	58.3506	50.4108
Tb927.11.11210	39.4594	34.9012	54.4965	28.5976	33.9201	19.8291	65.0545	66.758	79.7398	73.7524	69.8925	62.1734
Tb927.11.5020	22.1959	15.2693	16.5859	15.0932	21.9067	19.8291	121.863	123.534	79.7398	144.241	117.984	154.593
Tb927.11.3850	12.3311	17.4506	18.9553	23.0369	16.96	16.8915	78.7984	74.8688	79.7398	87.4586	101.312	99.1413
Tb927.11.3640	16.4414	21.8133	20.14	28.5976	32.5067	16.157	82.4635	102.945	79.7398	67.8783	80.152	78.977
Tb927.6.430	22.1959	30.5386	18.9553	15.8875	6.36001	15.4226	81.5472	86.0992	79.7398	50.9087	62.1979	72.2555
Tb927.11.1420	50.9684	34.9012	71.0824	6.35501	16.2534	13.2194	76.9659	74.8688	79.7398	33.2865	32.0608	45.3697
Tb927.11.9370	12.3311	10.9066	5.92353	15.8875	3.53334	12.485	45.813	29.9475	79.7398	45.0346	44.8851	73.9359
Tb927.6.1920	19.7297	13.088	28.4329	22.2426	19.7867	11.7506	43.0643	51.7843	79.7398	39.1606	71.175	75.6162
Tb927.2.3660	8.22071	10.9066	11.8471	16.6819	14.84	11.0162	78.7984	84.2274	79.7398	116.176	135.938	105.863
Tb09.v4.0066	13.9752	8.72531	27.2482	11.9157	8.48002	9.54735	80.6309	51.1604	79.7398	50.256	42.9615	75.6162
Tb927.11.12600	7.39864	17.4506	8.29294	15.8875	15.5467	9.54735	44.8968	43.6735	79.7398	46.34	62.8392	50.4108
Tb927.8.2810	12.3311	15.2693	13.0318	10.3269	11.3067	8.81294	56.8082	53.0321	79.7398	57.4355	71.175	72.2555
Tb927.2.5410	9.86485	10.9066	7.10824	9.53252	15.5467	8.81294	40.3155	40.554	79.7398	45.6873	48.0912	48.7305
Tb927.10.2570	13.9752	10.9066	4.73882	16.6819	18.3734	8.07852	84.296	92.9621	79.7398	71.1417	76.9459	70.5752
Tb927.5.1910	10.6869	10.9066	15.4012	6.35501	4.94668	7.34411	42.148	52.4082	79.7398	41.1186	28.8547	31.9269
Tb927.6.770	18.0856	6.54398	14.2165	3.97188	1.41334	6.6097	34.8179	36.8105	79.7398	35.2445	26.9311	45.3697
Tb927.1.1230	3.28828	4.36266	3.55412	5.56064	11.3067	5.14088	37.5667	38.6822	79.7398	31.3284	37.8317	42.009
Tb927.6.3560	9.86485	4.36266	13.0318	7.14939	2.82667	4.40647	59.557	79.2362	79.7398	66.5729	61.5567	50.4108
Tb927.10.12810	19.7297	21.8133	7.10824	14.2988	21.9067	1.46882	86.1285	88.5948	79.7398	69.8363	71.8162	70.5752
Tb927.6.2060	119.2	87.2531	162.305	99.2971	115.187	195.353	142.02	99.2012	77.3945	136.409	92.3351	62.1734
Tb927.5.2620	34.527	10.9066	68.713	69.1108	80.5602	173.321	54.0594	49.9126	77.3945	103.775	109.648	120.986
Tb927.11.16080	79.7409	85.0718	117.286	100.091	113.774	157.898	83.3797	69.8776	77.3945	72.447	89.7702	131.068
Tb927.5.1100	129.065	154.874	145.719	173.174	148.4	152.023	85.2123	83.6035	77.3945	97.9014	98.7472	100.822
Tb927.11.13270	145.507	80.7091	194.292	73.877	84.8002	136.601	57.7244	46.793	77.3945	46.34	64.7628	78.977
Tb927.6.1090	115.09	52.3519	130.318	101.68	65.7201	116.771	81.5472	66.758	77.3945	75.7104	89.129	89.0591
Tb927.2.5630	60.8332	41.4452	69.8977	73.877	34.6267	102.818	53.1431	62.3907	77.3945	71.7943	75.6635	105.863
Tb927.11.3610	143.04	13.088	145.719	23.0369	19.7867	95.4735	27.4878	22.4607	77.3945	19.5803	21.1601	68.8948
Tb927.9.6920	63.2994	111.248	94.7765	56.4008	86.2135	89.5982	93.4586	74.2449	77.3945	73.7524	78.8695	97.4609
Tb927.11.3120	69.876	65.4398	90.0377	76.2602	66.4268	87.3949	135.607	84.2274	77.3945	126.619	95.5412	105.863
Tb927.2.4700	66.5877	37.0826	87.6683	83.4096	73.4935	85.9261	66.887	81.7318	77.3945	77.6684	64.7628	67.2144
Tb927.10.12620	49.3242	30.5386	69.8977	72.2883	26.8534	85.9261	99.8724	81.1079	77.3945	117.482	92.3351	94.1002
Tb927.11.16970	46.036	39.2639	82.9294	58.7839	47.3468	82.9885	92.5423	93.586	77.3945	90.0693	94.2587	94.1002
Tb927.8.4390	71.5202	91.6158	59.2353	70.6995	57.9468	79.3164	75.1334	68.0059	77.3945	80.2791	55.1446	47.0501
Tb927.10.3200	41.1035	58.8959	40.28	78.6433	84.8002	76.3788	82.4635	76.7406	77.3945	126.619	122.472	129.388
Tb927.11.7080	50.1463	58.8959	87.6683	54.0176	65.0135	73.4411	58.6407	75.4927	77.3945	65.9203	68.6101	80.6573
Tb927.11.13230	46.036	74.1652	58.0506	110.418	80.5602	71.9723	82.4635	67.382	77.3945	109.65	134.014	102.502
Tb927.5.1210	100.293	80.7091	67.5282	147.754	84.0935	71.2379	100.789	147.242	77.3945	136.409	146.197	105.863
Tb927.9.1560	55.9008	54.5332	39.0953	81.0264	65.0135	70.5035	79.7147	53.0321	77.3945	69.8363	61.5567	70.5752
Tb927.10.13960	47.6801	37.0826	58.0506	54.812	45.2268	69.7691	69.6358	63.6385	77.3945	81.5845	60.9155	87.3788
Tb927.5.1460	41.9256	63.2585	63.9741	54.0176	56.5334	63.1594	101.705	69.2537	77.3945	94.638	75.6635	80.6573
Tb927.11.13060	32.0608	21.8133	52.1271	33.3638	33.2134	63.1594	82.4635	52.4082	77.3945	85.5005	71.8162	73.9359
Tb927.9.15470	31.2387	34.9012	62.7894	21.4482	27.5601	61.6906	74.2171	68.6298	77.3945	67.2256	62.1979	60.493
Tb927.10.820	33.7049	15.2693	46.2035	54.0176	33.2134	55.8153	43.9805	45.5452	77.3945	74.405	51.9385	60.493
Tb927.11.2230	42.7477	52.3519	47.3882	52.4289	45.9334	54.3464	88.8773	80.484	77.3945	79.6265	100.03	110.904
Tb927.7.1060	44.3918	39.2639	36.7259	46.0739	45.2268	52.1432	81.5472	77.9884	77.3945	78.9738	68.6101	53.7716
Tb927.10.850	17.2635	8.72531	41.4647	32.5695	26.8534	49.94	70.5521	77.9884	77.3945	86.1532	96.1824	100.822
Tb927.7.3920	53.4346	39.2639	40.28	35.747	47.3468	47.7367	46.7293	61.7668	77.3945	50.256	48.7324	38.6483
Tb927.10.7490	32.0608	32.7199	31.9871	40.5132	26.1467	47.7367	76.0496	69.2537	77.3945	73.0997	74.381	38.6483
Tb927.5.2560	54.2567	43.6266	79.3753	20.6538	20.4934	47.0023	67.8033	74.2449	77.3945	40.4659	39.1142	31.9269
Tb927.10.1420	40.2815	80.7091	36.7259	40.5132	89.7468	44.7991	116.365	102.945	77.3945	138.367	130.167	99.1413
Tb927.9.15380	13.9752	15.2693	42.6494	17.4763	24.0267	42.5959	43.9805	63.0146	77.3945	57.4355	46.1675	57.1323
Tb11.v5.0894.1	26.3063	28.3573	23.6941	27.0088	40.2801	38.1894	76.0496	62.3907	77.3945	69.8363	57.7094	58.8126
Tb927.7.2840	87.1395	95.9784	34.3565	127.895	72.7868	37.455	109.035	98.5773	77.3945	129.882	133.373	89.0591
Tb927.10.15230	42.7477	37.0826	40.28	30.1863	33.2134	37.455	67.8033	49.2887	77.3945	62.0042	50.6561	87.3788
Tb927.11.4160	67.4098	45.8079	21.3247	47.6626	43.1067	35.2517	68.7196	72.3732	77.3945	74.405	73.0986	94.1002
Tb927.11.12940	18.9076	43.6266	24.8788	19.8594	39.5734	34.5173	109.951	88.5948	77.3945	104.428	88.4878	80.6573
Tb927.7.4970	60.0112	115.61	72.2671	20.6538	60.0668	33.0485	76.0496	87.347	77.3945	52.2141	55.7858	52.0912
Tb927.4.2920	25.4842	17.4506	33.1718	19.8594	14.1334	33.0485	68.7196	62.3907	77.3945	48.9507	41.0378	42.009
Tb11.v5.0233.1	18.0856	17.4506	23.6941	14.2988	9.89335	33.0485	59.557	53.0321	77.3945	80.2791	65.404	82.3377
Tb927.3.4160	16.4414	41.4452	29.6177	11.9157	19.08	33.0485	76.0496	68.6298	77.3945	64.6149	64.7628	137.79
Tb927.8.2740	34.527	93.7971	42.6494	33.3638	76.3201	31.5797	66.887	61.7668	77.3945	78.3211	77.5871	55.4519
Tb927.9.12770	25.4842	21.8133	27.2482	31.7751	31.0934	31.5797	95.2911	63.6385	77.3945	98.5541	98.106	84.0181
Tb927.11.5140	40.2815	39.2639	40.28	43.6907	43.1067	30.8453	58.6407	53.656	77.3945	51.5614	54.5033	48.7305
Tb927.6.3180	36.1711	19.632	22.5094	36.5413	34.6267	30.8453	80.6309	87.347	77.3945	63.3096	90.4114	114.265
Tb927.8.3290	36.1711	8.72531	23.6941	29.3919	11.3067	30.1109	54.0594	61.7668	77.3945	52.2141	58.3506	62.1734
Tb927.8.5160	22.1959	15.2693	30.8024	7.94377	19.7867	30.1109	60.4732	59.8951	77.3945	60.6989	74.381	169.716
Tb927.10.15360	38.6373	34.9012	29.6177	42.102	22.6134	29.3765	100.789	103.569	77.3945	108.344	78.2283	82.3377
Tb927.6.140	29.5945	37.0826	41.4647	20.6538	26.1467	29.3765	60.4732	48.0408	77.3945	34.5918	44.2439	53.7716
Tb927.8.5620	13.9752	8.72531	10.6624	27.0088	20.4934	29.3765	68.7196	61.7668	77.3945	78.3211	94.8999	122.666
Tb927.2.280	20.5518	10.9066	23.6941	35.747	23.32	28.642	75.1334	64.8863	77.3945	39.1606	60.9155	55.4519
Tb927.5.4150	41.9256	13.088	34.3565	46.8682	28.9734	27.1732	43.0643	49.2887	77.3945	58.7408	53.8621	50.4108
Tb927.7.500	14.7973	10.9066	13.0318	11.9157	13.4267	26.4388	71.4683	70.5015	77.3945	56.1301	58.9919	70.5752
Tb927.10.15300	27.1283	21.8133	28.4329	19.065	26.8534	25.7044	75.1334	65.5102	77.3945	53.5194	58.3506	60.493
Tb927.8.5760	33.7049	50.1705	11.8471	58.7839	43.1067	24.97	103.537	91.7143	77.3945	142.936	119.907	92.4199
Tb927.11.12470	13.1531	10.9066	9.47765	23.8313	14.1334	24.2356	54.9756	61.7668	77.3945	49.6034	76.3047	73.9359
Tb11.v5.0603.1	48.5022	47.9892	17.7706	57.1951	43.8134	23.5012	76.0496	84.2274	77.3945	83.5425	80.152	104.182
Tb927.5.580	34.527	63.2585	14.2165	29.3919	50.8801	22.0323	57.7244	60.519	77.3945	67.8783	72.4574	48.7305
Tb927.4.120	29.5945	17.4506	16.5859	46.0739	21.2	21.2979	40.3155	46.1691	77.3945	28.7177	36.5493	63.8537
Tb927.6.1550	37.8153	41.4452	35.5412	27.8032	21.2	20.5635	67.8033	99.2012	77.3945	60.6989	56.427	36.9679
Tb927.3.4350	10.6869	0	14.2165	11.1213	11.3067	19.8291	47.6456	49.9126	77.3945	52.8667	75.0223	84.0181
Tb927.7.7200	17.2635	17.4506	2.36941	17.4763	22.6134	19.0947	42.148	53.656	77.3945	55.4774	69.8925	97.4609
Tb11.v5.0494.1	40.2815	80.7091	29.6177	29.3919	23.32	18.3603	78.7984	67.382	77.3945	70.489	42.9615	62.1734
Tb927.7.4110	31.2387	26.1759	49.7577	2.38313	11.3067	18.3603	73.3009	68.6298	77.3945	39.1606	54.5033	65.5341
Tb927.1.3880	27.9504	41.4452	17.7706	37.3357	29.6801	15.4226	92.5423	80.484	77.3945	114.871	94.8999	70.5752
Tb927.8.840	27.1283	32.7199	39.0953	11.1213	15.5467	14.6882	50.3943	63.6385	77.3945	38.5079	51.9385	62.1734
Tb927.11.14730	18.9076	34.9012	14.2165	23.8313	18.3734	13.2194	75.1334	73.621	77.3945	78.9738	54.5033	33.6072
Tb927.5.3590	14.7973	17.4506	23.6941	8.73815	7.06668	12.485	64.1383	64.2624	77.3945	56.1301	78.8695	65.5341
Tb927.10.8490	22.1959	63.2585	5.92353	11.9157	36.0401	11.0162	87.961	127.901	77.3945	85.5005	78.2283	47.0501
Tb927.10.5400	49.3242	61.0772	33.1718	23.8313	43.8134	10.2818	116.365	106.688	77.3945	88.1112	83.9993	35.2876
Tb927.11.14270	9.86485	6.54398	15.4012	19.8594	15.5467	10.2818	62.3057	58.6473	77.3945	68.531	78.2283	62.1734
Tb927.10.5420	4.11035	0	13.0318	7.94377	7.06668	8.07852	55.8919	63.6385	77.3945	58.0882	45.5263	62.1734
Tb927.7.2390	20.5518	8.72531	10.6624	10.3269	11.3067	7.34411	79.7147	68.0059	77.3945	60.6989	46.8088	28.5661
Tb927.11.14990	9.86485	15.2693	10.6624	14.2988	9.18668	7.34411	39.3992	43.0496	77.3945	41.7713	34.6257	28.5661
Tb927.9.12400	13.1531	10.9066	7.10824	7.94377	9.18668	5.87529	79.7147	80.484	77.3945	67.8783	75.0223	60.493
Tb927.7.5220	6.57657	13.088	5.92353	5.56064	6.36001	5.87529	47.6456	61.7668	77.3945	62.6569	73.7398	80.6573
Tb927.4.590	41.9256	93.7971	14.2165	37.3357	36.0401	3.67206	156.681	157.848	77.3945	128.577	101.953	35.2876
Tb927.11.1680	10.6869	8.72531	3.55412	11.1213	14.1334	2.93765	86.1285	69.8776	77.3945	95.2907	92.3351	62.1734
Tb927.10.5900	0.822071	0	2.36941	0.794377	3.53334	2.93765	66.887	59.8951	77.3945	52.8667	56.427	50.4108
Tb927.10.3510	2.46621	8.72531	3.55412	3.17751	7.77335	0.734411	56.8082	66.1341	77.3945	75.0577	64.7628	75.6162
Tb927.3.4010	1.64414	4.36266	1.18471	3.17751	0.706668	0	11.9114	11.8542	77.3945	16.9696	17.3128	87.3788
Tb927.3.3030	287.725	63.2585	238.126	236.724	132.147	362.799	85.2123	59.8951	75.0493	81.5845	64.7628	55.4519
Tb927.3.3750	97.0043	80.7091	156.381	105.652	89.7468	145.413	54.9756	53.656	75.0493	46.34	51.2973	42.009
Tb927.7.6690	45.2139	26.1759	36.7259	113.596	93.2802	121.912	59.557	57.3994	75.0493	105.733	136.579	174.758
Tb927.11.10760	101.937	71.9838	117.286	79.4377	81.2668	114.568	94.3749	65.5102	75.0493	75.0577	85.2817	99.1413
Tb927.4.2000	91.2498	98.1598	132.687	114.39	84.0935	110.162	159.429	114.175	75.0493	140.325	136.579	114.265
Tb927.11.12040	198.941	218.133	99.5153	209.715	105.294	101.349	54.0594	66.1341	75.0493	57.4355	50.6561	127.707
Tb927.11.16160	47.6801	117.792	77.0059	77.8489	96.1068	93.2702	121.863	99.8251	75.0493	97.9014	98.7472	105.863
Tb927.9.14160	119.2	157.056	94.7765	58.7839	72.7868	89.5982	117.281	118.542	75.0493	126.619	69.2513	70.5752
Tb927.11.2420	36.1711	63.2585	97.1459	51.6345	47.3468	82.9885	84.296	76.7406	75.0493	73.7524	88.4878	48.7305
Tb927.7.3410	92.894	61.0772	48.5729	92.1477	61.4801	82.2541	82.4635	69.8776	75.0493	95.2907	78.8695	73.9359
Tb927.5.1490	31.2387	30.5386	45.0188	24.6257	33.2134	79.3164	69.6358	59.2712	75.0493	64.6149	82.7168	119.306
Tb927.11.6370	73.1643	37.0826	85.2988	68.3164	45.2268	77.8476	118.198	72.9971	75.0493	75.0577	81.4344	67.2144
Tb927.3.1560	38.6373	32.7199	62.7894	59.5783	28.9734	77.8476	80.6309	67.382	75.0493	88.7639	62.8392	53.7716
Tb927.11.7020	52.6125	56.7145	93.5918	48.457	70.6668	75.6444	71.4683	56.1516	75.0493	69.8363	90.4114	87.3788
Tb927.10.12590	40.2815	34.9012	68.713	47.6626	44.5201	74.91	72.3846	42.4257	75.0493	56.1301	91.6939	100.822
Tb927.7.7210	35.349	28.3573	54.4965	36.5413	33.2134	68.3003	75.1334	67.382	75.0493	71.1417	75.6635	109.223
Tb927.3.3760	133.998	159.237	75.8212	121.54	91.1602	67.5658	45.813	50.5365	75.0493	30.6758	39.7554	43.6894
Tb927.5.2820	36.1711	15.2693	33.1718	54.0176	48.7601	62.425	65.9708	76.7406	75.0493	60.0462	70.5337	110.904
Tb927.9.6110	44.3918	21.8133	62.7894	61.167	50.1734	58.7529	62.3057	61.1429	75.0493	69.1836	66.6864	68.8948
Tb927.10.2790	37.8153	109.066	45.0188	40.5132	79.8535	58.0185	32.0691	44.2974	75.0493	47.6453	55.1446	63.8537
Tb927.11.6810	31.2387	41.4452	35.5412	37.3357	24.7334	55.8153	69.6358	61.1429	75.0493	77.6684	64.1216	72.2555
Tb927.10.8820	44.3918	26.1759	33.1718	46.0739	52.2934	55.0808	76.9659	74.2449	75.0493	110.302	107.724	109.223
Tb927.9.4500	20.5518	63.2585	7.10824	185.09	214.12	55.0808	110.868	92.3382	75.0493	259.112	314.837	166.356
Tb927.11.10380	36.1711	10.9066	84.1141	40.5132	26.8534	52.1432	51.3106	49.9126	75.0493	50.256	65.404	52.0912
Tb05.5K5.160	95.3602	45.8079	31.9871	77.8489	51.5868	51.4088	57.7244	63.0146	75.0493	62.0042	87.8466	92.4199
Tb927.11.9790	29.5945	69.8025	36.7259	50.0457	61.4801	51.4088	93.4586	62.3907	75.0493	62.0042	76.9459	57.1323
Tb927.8.7400	27.9504	4.36266	48.5729	34.9526	33.9201	50.6744	68.7196	64.2624	75.0493	84.1952	86.5641	112.584
Tb927.10.14140	65.7657	176.688	82.9294	42.8964	57.2401	46.2679	88.8773	77.9884	75.0493	66.5729	45.5263	55.4519
Tb927.3.5190	28.7725	21.8133	50.9424	30.9807	30.3867	46.2679	56.8082	60.519	75.0493	57.4355	62.1979	65.5341
Tb927.9.13740	49.3242	56.7145	52.1271	50.8401	57.9468	45.5335	128.277	106.064	75.0493	115.524	89.7702	65.5341
Tb927.9.7540	26.3063	23.9946	29.6177	52.4289	43.1067	43.3303	71.4683	66.1341	75.0493	77.6684	68.6101	109.223
Tb927.10.11150	22.1959	39.2639	45.0188	30.1863	36.7467	42.5959	48.5618	51.7843	75.0493	51.5614	56.427	68.8948
Tb927.1.3110	45.2139	47.9892	39.0953	38.9245	38.1601	39.6582	65.9708	49.2887	75.0493	61.3515	58.3506	63.8537
Tb927.11.2570	55.0787	21.8133	67.5282	47.6626	28.9734	38.9238	71.4683	61.7668	75.0493	68.531	76.9459	62.1734
Tb927.10.9700	32.8828	15.2693	49.7577	30.9807	24.7334	38.9238	64.1383	44.9213	75.0493	64.6149	66.0452	104.182
Tb11.1220	41.9256	41.4452	54.4965	29.3919	21.9067	38.1894	46.7293	58.0234	75.0493	48.298	35.9081	42.009
Tb927.7.570	60.0112	47.9892	34.3565	69.1108	65.0135	37.455	101.705	60.519	75.0493	64.6149	67.3277	95.7806
Tb11.v5.0560.1	27.1283	17.4506	39.0953	29.3919	23.32	37.455	57.7244	51.7843	75.0493	52.8667	48.0912	65.5341
Tb11.v5.0594.1	27.1283	21.8133	43.8341	21.4482	19.08	34.5173	83.3797	66.1341	75.0493	53.5194	61.5567	60.493
Tb927.9.1410	23.018	13.088	27.2482	35.747	30.3867	34.5173	47.6456	51.7843	75.0493	67.2256	79.5108	63.8537
Tb927.11.16230	22.1959	28.3573	27.2482	21.4482	14.84	34.5173	61.3895	68.6298	75.0493	90.0693	78.8695	77.2966
Tb927.2.2580	17.2635	15.2693	22.5094	16.6819	19.08	33.7829	40.3155	38.6822	75.0493	41.1186	60.9155	57.1323
Tb927.5.2150	27.1283	26.1759	24.8788	16.6819	17.6667	33.0485	71.4683	67.382	75.0493	67.2256	58.3506	55.4519
Tb927.11.13360	16.4414	23.9946	22.5094	41.3076	42.4001	33.0485	103.537	91.7143	75.0493	121.398	114.778	92.4199
Tb927.11.3350	15.6193	15.2693	15.4012	20.6538	29.6801	30.8453	43.9805	63.6385	75.0493	78.9738	78.8695	63.8537
Tb927.10.1990	48.5022	26.1759	55.6812	19.8594	24.0267	30.1109	75.1334	69.2537	75.0493	62.0042	75.0223	78.977
Tb927.9.8610	29.5945	21.8133	21.3247	42.8964	29.6801	28.642	50.3943	56.1516	75.0493	55.4774	69.8925	67.2144
Tb927.9.3120	23.8401	21.8133	48.5729	27.8032	28.2667	28.642	104.454	92.9621	75.0493	90.0693	91.0527	53.7716
Tb927.10.6410	22.1959	13.088	27.2482	30.9807	18.3734	26.4388	95.2911	61.7668	75.0493	91.3746	86.5641	82.3377
Tb927.9.13050	21.3738	37.0826	18.9553	16.6819	24.7334	26.4388	72.3846	75.4927	75.0493	71.7943	73.0986	58.8126
Tb927.11.6990	15.6193	13.088	15.4012	8.73815	7.77335	26.4388	67.8033	74.2449	75.0493	52.2141	44.8851	92.4199
Tb927.6.3000	38.6373	61.0772	36.7259	31.7751	38.1601	25.7044	113.616	137.883	75.0493	110.302	117.984	68.8948
Tb927.10.9040	17.2635	8.72531	20.14	22.2426	13.4267	25.7044	39.3992	58.0234	75.0493	55.4774	50.0148	55.4519
Tb927.4.5010	62.4774	174.506	24.8788	81.8208	96.8135	23.5012	123.695	119.79	75.0493	120.092	137.861	126.027
Tb927.7.1100	15.6193	39.2639	16.5859	30.9807	21.9067	23.5012	71.4683	56.7755	75.0493	92.0273	80.152	95.7806
Tb927.1.1910	25.4842	17.4506	24.8788	12.71	20.4934	22.7668	100.789	79.2362	75.0493	60.0462	71.175	77.2966
Tb927.10.970	12.3311	21.8133	20.14	20.6538	18.3734	22.7668	54.9756	64.8863	75.0493	60.0462	78.2283	87.3788
Tb927.6.3310	27.1283	19.632	24.8788	15.8875	19.7867	22.0323	64.1383	55.5277	75.0493	57.4355	60.9155	42.009
Tb927.7.6950	15.6193	21.8133	23.6941	15.0932	11.3067	22.0323	40.3155	34.3149	75.0493	43.0766	58.9919	68.8948
Tb927.11.16010	36.1711	8.72531	14.2165	35.747	22.6134	21.2979	75.1334	91.0904	75.0493	88.7639	94.2587	50.4108
Tb927.9.13570	32.0608	6.54398	15.4012	12.71	7.06668	21.2979	68.7196	54.9038	75.0493	54.8248	36.5493	62.1734
Tb927.6.2450	19.7297	8.72531	15.4012	15.0932	12.0134	21.2979	49.4781	48.6647	75.0493	31.3284	46.1675	43.6894
Tb927.6.2020	13.1531	6.54398	11.8471	11.9157	12.72	21.2979	52.2269	56.7755	75.0493	62.6569	66.0452	65.5341
Tb927.10.13360	55.0787	69.8025	35.5412	30.9807	39.5734	20.5635	90.7098	64.8863	75.0493	116.176	80.152	35.2876
Tb927.7.7050	13.9752	13.088	20.14	18.2707	30.3867	20.5635	95.2911	80.484	75.0493	107.039	101.312	85.6984
Tb927.11.13000	26.3063	21.8133	16.5859	19.8594	24.0267	18.3603	58.6407	78.6123	75.0493	58.0882	93.6175	58.8126
Tb927.7.700	17.2635	28.3573	13.0318	15.8875	38.8667	18.3603	63.222	64.8863	75.0493	68.531	64.1216	53.7716
Tb927.10.1540	12.3311	21.8133	18.9553	15.8875	19.7867	18.3603	67.8033	60.519	75.0493	56.7828	64.1216	73.9359
Tb927.8.6870	30.4166	13.088	21.3247	19.065	9.89335	16.157	40.3155	39.93	75.0493	48.298	36.5493	45.3697
Tb927.11.8150	8.22071	2.18133	5.92353	19.065	12.0134	16.157	46.7293	53.0321	75.0493	63.9622	72.4574	65.5341
Tb927.11.6450	27.9504	19.632	14.2165	19.8594	22.6134	14.6882	63.222	60.519	75.0493	55.4774	36.5493	60.493
Tb927.3.4510	9.04278	8.72531	14.2165	10.3269	11.3067	14.6882	37.5667	51.7843	75.0493	54.1721	59.6331	58.8126
Tb927.5.850	22.1959	23.9946	13.0318	28.5976	20.4934	13.9538	54.9756	58.6473	75.0493	53.5194	61.5567	63.8537
Tb11.v5.0326.1	13.1531	4.36266	5.92353	14.2988	6.36001	12.485	64.1383	72.9971	75.0493	62.0042	59.6331	57.1323
Tb927.3.2730	7.39864	4.36266	4.73882	9.53252	5.65334	12.485	62.3057	64.8863	75.0493	57.4355	67.9689	57.1323
Tb927.7.6360	30.4166	54.5332	9.47765	32.5695	53.7068	11.7506	98.9562	99.2012	75.0493	97.9014	120.549	114.265
Tb11.v5.0520.1	15.6193	15.2693	5.92353	21.4482	18.3734	11.7506	64.1383	63.6385	75.0493	61.3515	55.7858	87.3788
Tb927.10.5890	13.1531	6.54398	16.5859	13.5044	2.12	11.7506	38.483	43.0496	75.0493	43.7293	42.3202	72.2555
Tb927.8.2380	13.1531	0	4.73882	33.3638	40.2801	11.7506	67.8033	83.6035	75.0493	90.7219	96.8236	75.6162
Tb927.8.1100	15.6193	19.632	17.7706	12.71	8.48002	11.0162	69.6358	86.7231	75.0493	95.2907	73.7398	97.4609
Tb927.10.2470	14.7973	6.54398	9.47765	15.0932	14.84	11.0162	55.8919	84.2274	75.0493	66.5729	69.8925	43.6894
Tb927.8.1280	9.86485	13.088	8.29294	9.53252	9.89335	10.2818	46.7293	49.9126	75.0493	67.8783	57.7094	107.543
Tb927.11.2290	13.9752	8.72531	5.92353	11.1213	9.89335	9.54735	54.0594	75.4927	75.0493	67.8783	98.106	62.1734
Tb927.11.830	12.3311	8.72531	11.8471	13.5044	11.3067	8.81294	66.887	62.3907	75.0493	73.0997	83.3581	72.2555
Tb927.8.7740	55.0787	0	23.6941	11.1213	4.24001	8.07852	48.5618	40.554	75.0493	46.9927	27.5723	89.0591
Tb927.8.7860	3.28828	0	13.0318	8.73815	4.94668	7.34411	37.5667	47.4169	75.0493	30.0231	32.702	52.0912
Tb927.6.990	23.018	76.3465	5.92353	21.4482	31.0934	6.6097	84.296	93.586	75.0493	66.5729	76.3047	80.6573
Tb927.8.1640	23.8401	28.3573	8.29294	13.5044	25.44	5.87529	85.2123	82.9796	75.0493	81.5845	73.0986	67.2144
Tb927.6.2350	5.75449	8.72531	4.73882	1.58875	3.53334	2.93765	48.5618	53.656	75.0493	59.3935	61.5567	78.977
Tb927.6.2290	3.28828	6.54398	2.36941	3.17751	4.94668	2.93765	49.4781	66.1341	75.0493	56.1301	66.6864	73.9359
Tb927.3.3090	11.509	10.9066	15.4012	3.97188	4.24001	2.20323	38.483	62.3907	75.0493	58.7408	55.1446	67.2144
Tb05.5K5.30	69.0539	17.4506	74.6365	131.867	89.7468	182.868	92.5423	75.4927	72.704	124.008	150.045	164.675
Tb927.9.5460	75.6305	52.3519	93.5918	51.6345	67.8401	131.46	80.6309	79.2362	72.704	92.0273	77.5871	104.182
Tb927.11.8040	64.1215	41.4452	66.3435	60.3726	78.4401	112.365	33.9016	24.9563	72.704	27.4124	17.954	42.009
Tb927.10.14270	6.57657	2.18133	13.0318	58.7839	43.1067	106.49	27.4878	27.4519	72.704	73.7524	67.3277	99.1413
Tb927.10.10550	98.6485	141.786	97.1459	84.9983	103.174	99.8799	89.7936	59.8951	72.704	86.8059	98.106	85.6984
Tb927.11.10820	59.1891	67.6212	49.7577	51.6345	72.0801	69.0347	56.8082	50.5365	72.704	52.2141	76.9459	73.9359
Tb927.1.2110	45.2139	6.54398	94.7765	38.9245	31.0934	65.3626	50.3943	36.1866	72.704	41.7713	30.1371	62.1734
Tb927.10.14530	44.3918	41.4452	65.1588	45.2795	69.9601	63.8938	73.3009	64.2624	72.704	65.2676	73.7398	87.3788
Tb927.11.1700	33.7049	50.1705	59.2353	39.7188	37.4534	63.1594	58.6407	58.6473	72.704	86.1532	74.381	105.863
Tb927.6.4520	65.7657	58.8959	69.8977	64.3445	52.2934	61.6906	48.5618	46.793	72.704	56.7828	78.2283	52.0912
Tb927.11.7340	87.9616	45.8079	56.8659	75.4658	43.8134	60.9561	59.557	48.6647	72.704	55.4774	60.9155	62.1734
Tb927.9.11940	30.4166	17.4506	34.3565	33.3638	43.1067	60.2217	59.557	51.7843	72.704	78.9738	83.9993	60.493
Tb927.5.940	60.8332	41.4452	84.1141	61.9614	49.4668	59.4873	66.887	76.1167	72.704	71.7943	75.0223	80.6573
Tb927.10.14510	56.7229	15.2693	68.713	49.2514	48.0534	59.4873	87.0448	76.1167	72.704	65.2676	93.6175	84.0181
Tb927.5.3900	43.5697	19.632	43.8341	47.6626	28.9734	58.7529	84.296	74.2449	72.704	93.9853	95.5412	152.913
Tb927.9.4350	26.3063	26.1759	39.0953	50.0457	31.8001	55.8153	51.3106	50.5365	72.704	58.7408	63.4804	110.904
Tb927.6.4540	101.115	111.248	77.0059	79.4377	62.1868	55.0808	91.6261	81.1079	72.704	73.7524	76.9459	70.5752
Tb927.8.7260	41.1035	45.8079	40.28	48.457	62.1868	55.0808	43.0643	56.7755	72.704	40.4659	58.3506	78.977
Tb927.8.7580	56.7229	26.1759	48.5729	57.9895	55.8268	53.612	77.8822	94.21	72.704	93.9853	130.167	120.986
Tb927.11.6160	61.6553	91.6158	65.1588	58.7839	60.7734	52.1432	109.035	89.2187	72.704	93.9853	86.5641	73.9359
Tb927.9.6830	35.349	8.72531	29.6177	43.6907	37.4534	52.1432	35.7342	30.5714	72.704	40.4659	42.3202	52.0912
Tb927.11.4740	27.1283	19.632	35.5412	41.3076	31.8001	51.4088	82.4635	72.3732	72.704	74.405	73.7398	53.7716
Tb927.10.13790	13.9752	21.8133	15.4012	39.7188	33.2134	50.6744	63.222	49.2887	72.704	75.0577	71.175	129.388
Tb927.7.7460	87.9616	135.242	66.3435	46.8682	103.174	47.7367	135.607	100.449	72.704	110.302	81.4344	52.0912
Tb927.9.12800	26.3063	28.3573	39.0953	42.102	16.2534	44.0647	92.5423	86.7231	72.704	100.512	108.365	95.7806
Tb927.3.4040	41.1035	52.3519	40.28	42.102	31.0934	43.3303	93.4586	79.2362	72.704	99.8594	95.5412	97.4609
Tb927.9.2580	40.2815	30.5386	50.9424	31.7751	69.9601	43.3303	69.6358	71.7493	72.704	68.531	76.9459	60.493
Tb927.2.1080	45.2139	56.7145	59.2353	43.6907	53.0001	41.127	115.449	104.816	72.704	79.6265	91.0527	95.7806
Tb927.7.4100	36.1711	39.2639	46.2035	39.7188	41.6934	39.6582	65.0545	71.1254	72.704	71.7943	87.8466	67.2144
Tb927.11.1620	42.7477	28.3573	36.7259	30.9807	48.7601	38.9238	121.863	97.3295	72.704	86.8059	74.381	40.3287
Tb927.11.13650	31.2387	26.1759	73.4518	36.5413	24.7334	38.1894	65.9708	47.4169	72.704	55.4774	40.3966	40.3287
Tb927.10.770	22.1959	30.5386	33.1718	26.2144	35.3334	37.455	54.9756	56.7755	72.704	56.1301	63.4804	55.4519
Tb927.2.4610	37.8153	28.3573	40.28	26.2144	20.4934	36.7206	65.0545	56.7755	72.704	68.531	55.1446	85.6984
Tb927.5.4420	30.4166	71.9838	29.6177	51.6345	83.3868	36.7206	139.272	107.936	72.704	125.314	89.7702	58.8126
Tb927.10.6730	124.955	126.517	42.6494	77.0546	126.494	35.9862	94.3749	121.038	72.704	102.47	93.6175	45.3697
Tb927.3.3340	22.1959	10.9066	49.7577	8.73815	22.6134	35.9862	54.9756	48.6647	72.704	66.5729	53.8621	73.9359
Tb927.3.3590	13.9752	21.8133	20.14	15.8875	22.6134	35.2517	76.0496	54.9038	72.704	60.0462	71.8162	70.5752
Tb927.9.6350	25.4842	26.1759	29.6177	31.7751	28.9734	33.7829	35.7342	46.793	72.704	37.8552	43.6027	36.9679
Tb11.v5.0365.1	46.036	61.0772	39.0953	26.2144	43.8134	33.0485	59.557	78.6123	72.704	67.8783	85.9229	70.5752
Tb927.11.2090	44.3918	30.5386	40.28	38.9245	40.9867	32.3141	64.1383	59.2712	72.704	70.489	51.2973	67.2144
Tb927.1.1420	21.3738	6.54398	27.2482	31.7751	21.9067	32.3141	56.8082	32.4432	72.704	65.9203	49.3736	80.6573
Tb927.2.1680	31.2387	34.9012	34.3565	19.8594	41.6934	31.5797	61.3895	56.1516	72.704	65.2676	65.404	50.4108
Tb927.8.6890	38.6373	41.4452	62.7894	47.6626	44.5201	30.1109	45.813	54.9038	72.704	42.4239	26.2898	78.977
Tb927.7.2880	92.0719	104.704	35.5412	125.512	73.4935	29.3765	117.281	86.7231	72.704	104.428	123.755	99.1413
Tb927.8.8290	50.9684	23.9946	42.6494	25.4201	19.08	29.3765	116.365	105.44	72.704	116.829	73.7398	94.1002
Tb927.2.4240	30.4166	21.8133	31.9871	20.6538	15.5467	27.1732	82.4635	81.1079	72.704	74.405	62.1979	82.3377
Tb927.8.1500	22.1959	21.8133	29.6177	23.0369	25.44	26.4388	65.9708	65.5102	72.704	80.2791	64.1216	67.2144
Tb927.9.6940	13.9752	21.8133	21.3247	30.1863	33.2134	26.4388	75.1334	64.2624	72.704	85.5005	74.381	100.822
Tb927.10.8600	14.7973	10.9066	15.4012	19.8594	9.89335	25.7044	42.148	50.5365	72.704	57.4355	64.7628	77.2966
Tb927.6.2840	9.86485	6.54398	21.3247	27.8032	28.2667	24.97	90.7098	87.9709	72.704	67.2256	81.4344	62.1734
Tb927.10.1470	63.2994	19.632	50.9424	25.4201	28.9734	22.7668	74.2171	69.2537	72.704	48.9507	46.8088	70.5752
Tb927.7.2580	20.5518	13.088	49.7577	9.53252	20.4934	22.7668	35.7342	37.4344	72.704	25.4544	28.2135	48.7305
Tb927.2.5240	27.9504	28.3573	28.4329	14.2988	26.1467	22.0323	63.222	54.9038	72.704	69.8363	61.5567	30.2465
Tb11.v5.0535.1	25.4842	34.9012	28.4329	30.1863	36.7467	21.2979	67.8033	58.6473	72.704	54.1721	53.2209	70.5752
Tb927.11.1610	17.2635	17.4506	17.7706	22.2426	16.2534	21.2979	60.4732	81.1079	72.704	67.2256	64.7628	94.1002
Tb927.2.5860	9.04278	6.54398	40.28	10.3269	5.65334	21.2979	27.4878	24.3324	72.704	27.4124	35.9081	55.4519
Tb927.6.1860	22.1959	15.2693	24.8788	19.8594	14.84	20.5635	51.3106	46.793	72.704	54.8248	53.2209	47.0501
Tb927.10.14410	17.2635	8.72531	16.5859	19.8594	15.5467	19.8291	50.3943	46.1691	72.704	65.9203	81.4344	73.9359
Tb927.9.3340	27.1283	21.8133	20.14	38.9245	16.96	18.3603	43.0643	51.1604	72.704	49.6034	35.2669	45.3697
Tb927.9.6100	10.6869	15.2693	15.4012	8.73815	35.3334	18.3603	90.7098	114.799	72.704	118.134	128.884	77.2966
Tb927.11.9800	25.4842	30.5386	14.2165	12.71	11.3067	17.6259	44.8968	53.0321	72.704	48.298	55.1446	60.493
Tb927.7.5150	18.9076	28.3573	16.5859	20.6538	14.1334	17.6259	45.813	78.6123	72.704	60.6989	74.381	70.5752
Tb11.v5.0971.1	32.0608	21.8133	34.3565	15.0932	16.2534	16.8915	54.9756	50.5365	72.704	40.4659	48.7324	42.009
Tb927.8.610	32.0608	21.8133	16.5859	9.53252	11.3067	16.8915	77.8822	73.621	72.704	46.9927	54.5033	33.6072
Tb927.10.11330	24.6621	28.3573	10.6624	11.1213	24.7334	16.157	71.4683	77.9884	72.704	71.7943	80.152	50.4108
Tb927.4.1870	18.9076	13.088	16.5859	12.71	15.5467	16.157	51.3106	48.6647	72.704	36.5498	54.5033	70.5752
Tb927.6.2980	18.9076	8.72531	15.4012	10.3269	9.89335	16.157	45.813	63.6385	72.704	58.0882	67.3277	57.1323
Tb927.11.9190	11.509	13.088	18.9553	15.0932	3.53334	16.157	62.3057	65.5102	72.704	48.298	50.6561	60.493
Tb927.10.14430	32.0608	37.0826	14.2165	19.8594	24.7334	15.4226	87.0448	90.4665	72.704	80.9318	69.2513	63.8537
Tb927.10.15390	13.9752	10.9066	18.9553	16.6819	19.7867	14.6882	45.813	63.0146	72.704	71.1417	62.8392	50.4108
Tb927.11.11140	13.1531	6.54398	17.7706	13.5044	11.3067	13.9538	63.222	51.1604	72.704	41.1186	41.0378	47.0501
Tb927.7.5980	50.9684	102.522	31.9871	14.2988	32.5067	13.2194	120.03	102.321	72.704	92.0273	55.7858	42.009
Tb927.5.3240	17.2635	6.54398	14.2165	5.56064	6.36001	13.2194	44.8968	39.3061	72.704	39.1606	55.7858	63.8537
Tb927.8.830	14.7973	13.088	18.9553	9.53252	9.18668	13.2194	50.3943	54.2799	72.704	39.1606	31.4196	36.9679
Tb11.v5.0542.1	13.9752	30.5386	11.8471	18.2707	16.2534	13.2194	56.8082	49.2887	72.704	61.3515	49.3736	68.8948
Tb927.11.11020	11.509	10.9066	16.5859	11.1213	11.3067	11.0162	32.9854	56.7755	72.704	43.7293	51.2973	50.4108
Tb927.8.810	34.527	41.4452	33.1718	15.0932	14.84	10.2818	55.8919	53.656	72.704	29.3704	32.702	33.6072
Tb927.11.9520	9.86485	6.54398	13.0318	12.71	21.2	10.2818	78.7984	56.7755	72.704	95.9434	76.9459	73.9359
Tb927.10.2990	9.04278	10.9066	7.10824	14.2988	13.4267	8.81294	68.7196	62.3907	72.704	65.9203	71.175	90.7395
Tb927.3.1420	12.3311	13.088	3.55412	19.065	15.5467	8.07852	76.0496	86.0992	72.704	105.733	122.472	124.347
Tb927.10.9200	5.75449	2.18133	4.73882	3.17751	7.06668	8.07852	91.6261	70.5015	72.704	82.8898	78.2283	60.493
Tb927.6.1040	49.3242	65.4398	8.29294	35.747	29.6801	6.6097	101.705	104.816	72.704	88.7639	75.6635	60.493
Tb927.7.5960	19.7297	34.9012	11.8471	3.97188	11.3067	6.6097	108.119	91.7143	72.704	89.4166	55.7858	58.8126
Tb927.2.5930	13.1531	13.088	5.92353	15.0932	8.48002	6.6097	69.6358	57.3994	72.704	65.2676	78.2283	45.3697
Tb927.5.1890	9.04278	6.54398	4.73882	5.56064	2.82667	5.14088	50.3943	53.656	72.704	44.382	39.7554	45.3697
Tb11.v5.0964.1	4.11035	0	7.10824	2.38313	6.36001	5.14088	33.9016	38.6822	72.704	35.8972	32.702	33.6072
Tb927.9.9260	13.9752	26.1759	23.6941	5.56064	11.3067	3.67206	93.4586	130.397	72.704	37.8552	55.7858	40.3287
Tb927.8.1830	6.57657	2.18133	4.73882	5.56064	7.06668	3.67206	33.9016	42.4257	72.704	33.2865	41.679	57.1323
Tb927.4.1920	29.5945	19.632	3.55412	20.6538	17.6667	2.93765	58.6407	61.1429	72.704	51.5614	41.0378	35.2876
Tb927.7.6670	12.3311	23.9946	9.47765	15.8875	13.4267	2.93765	95.2911	86.7231	72.704	99.2067	111.572	62.1734
Tb927.10.12310	1.64414	0	1.18471	0.794377	0	2.93765	58.6407	51.1604	72.704	48.298	50.6561	67.2144
Tb927.5.320	10.6869	6.54398	7.10824	7.14939	7.77335	2.20323	44.8968	63.0146	72.704	31.3284	48.7324	70.5752
Tb927.10.12520	5.75449	2.18133	7.10824	10.3269	7.06668	1.46882	48.5618	70.5015	72.704	62.0042	67.3277	67.2144
Tb927.8.6330	55.0787	39.2639	68.713	84.9983	67.1335	132.928	76.0496	65.5102	70.3587	83.5425	92.3351	105.863
Tb927.7.5380	2.46621	2.18133	26.0635	94.5308	76.3201	128.522	26.5716	21.8367	70.3587	117.482	103.877	164.675
Tb927.9.8905	68.2319	26.1759	33.1718	209.715	81.2668	127.053	58.6407	44.9213	70.3587	59.3935	56.427	67.2144
Tb11.v5.0629.1	39.4594	104.704	127.948	40.5132	60.7734	125.584	22.9065	49.2887	70.3587	32.6338	40.3966	38.6483
Tb927.10.14390	97.8264	21.8133	62.7894	117.568	77.0268	107.224	80.6309	84.2274	70.3587	70.489	98.106	72.2555
Tb927.9.2390	140.574	71.9838	129.133	88.9702	110.24	99.8799	74.2171	51.7843	70.3587	52.2141	51.2973	57.1323
Tb927.11.10240	64.1215	111.248	58.0506	91.3533	97.5202	87.3949	116.365	127.901	70.3587	138.367	101.953	114.265
Tb927.3.1110	28.7725	17.4506	50.9424	27.0088	27.5601	84.4573	67.8033	64.2624	70.3587	73.7524	63.4804	55.4519
Tb11.v5.0660.1	63.2994	137.424	65.1588	72.2883	101.76	74.1755	72.3846	72.3732	70.3587	69.1836	81.4344	127.707
Tb927.10.790	25.4842	71.9838	58.0506	33.3638	60.7734	71.2379	56.8082	71.7493	70.3587	57.4355	60.9155	70.5752
Tb927.9.8190	54.2567	54.5332	80.56	57.9895	55.8268	69.0347	68.7196	69.8776	70.3587	84.8479	64.7628	38.6483
Tb927.10.10280	78.0967	76.3465	80.56	60.3726	54.4134	65.3626	76.0496	49.9126	70.3587	49.6034	55.1446	70.5752
Tb927.11.4210	31.2387	34.9012	43.8341	68.3164	39.5734	65.3626	78.7984	47.4169	70.3587	111.608	83.9993	97.4609
Tb927.10.5500	14.7973	21.8133	34.3565	26.2144	36.0401	65.3626	93.4586	81.7318	70.3587	109.65	94.2587	94.1002
Tb927.3.3190	35.349	32.7199	56.8659	50.8401	40.2801	64.6282	61.3895	49.9126	70.3587	74.405	67.3277	72.2555
Tb927.2.4550	29.5945	32.7199	39.0953	37.3357	49.4668	64.6282	141.104	81.7318	70.3587	116.829	96.8236	75.6162
Tb927.4.4570	55.9008	52.3519	58.0506	49.2514	52.2934	63.8938	67.8033	74.2449	70.3587	82.8898	76.9459	107.543
Tb927.11.15010	31.2387	28.3573	39.0953	21.4482	31.0934	63.8938	98.0399	74.8688	70.3587	80.2791	76.9459	99.1413
Tb927.7.4120	58.367	98.1598	46.2035	56.4008	90.4535	63.1594	80.6309	70.5015	70.3587	90.0693	100.671	70.5752
Tb927.4.1330	21.3738	56.7145	26.0635	59.5783	67.8401	61.6906	93.4586	66.1341	70.3587	94.638	124.396	124.347
Tb927.10.8040	36.1711	32.7199	53.3118	46.8682	44.5201	60.9561	74.2171	67.382	70.3587	84.8479	84.6405	89.0591
Tb927.11.15080	36.9932	71.9838	31.9871	46.8682	83.3868	55.8153	50.3943	69.2537	70.3587	60.0462	45.5263	70.5752
Tb927.10.7120	77.2746	43.6266	42.6494	84.2039	49.4668	49.94	58.6407	58.6473	70.3587	50.9087	70.5337	45.3697
Tb11.v5.0414.1	63.2994	82.8905	28.4329	87.3815	58.6534	48.4711	103.537	116.047	70.3587	97.2487	122.472	70.5752
Tb927.7.3360	50.1463	26.1759	63.9741	27.8032	33.2134	44.7991	87.0448	68.0059	70.3587	78.9738	66.6864	77.2966
Tb927.6.4800	33.7049	58.8959	36.7259	29.3919	60.7734	41.8614	89.7936	64.2624	70.3587	86.8059	78.8695	60.493
Tb927.4.1680	30.4166	34.9012	39.0953	34.9526	24.7334	41.127	70.5521	59.8951	70.3587	75.7104	64.7628	43.6894
Tb927.11.12560	50.9684	63.2585	77.0059	43.6907	43.8134	39.6582	52.2269	48.6647	70.3587	49.6034	65.404	63.8537
Tb927.11.8300	47.6801	23.9946	40.28	22.2426	32.5067	38.9238	65.9708	67.382	70.3587	59.3935	50.0148	58.8126
Tb927.1.4650	7.39864	2.18133	8.29294	11.9157	22.6134	38.1894	32.9854	30.5714	70.3587	82.2372	84.6405	173.077
Tb927.7.2890	87.9616	85.0718	40.28	103.269	71.3735	37.455	110.868	89.8426	70.3587	118.134	139.144	80.6573
Tb927.5.3830	31.2387	65.4398	29.6177	55.6064	65.0135	35.2517	100.789	87.347	70.3587	103.775	79.5108	50.4108
Tb927.10.9890	25.4842	23.9946	22.5094	30.1863	22.6134	33.7829	74.2171	65.5102	70.3587	72.447	76.9459	68.8948
Tb927.9.9520	15.6193	30.5386	13.0318	19.8594	27.5601	33.7829	75.1334	97.3295	70.3587	92.68	85.9229	186.52
Tb927.9.13650	32.8828	34.9012	33.1718	28.5976	40.2801	31.5797	115.449	99.8251	70.3587	101.165	77.5871	62.1734
Tb927.7.2710	52.6125	45.8079	46.2035	37.3357	54.4134	29.3765	69.6358	83.6035	70.3587	49.6034	66.6864	63.8537
Tb927.5.4520	31.2387	13.088	15.4012	27.8032	23.32	29.3765	47.6456	54.2799	70.3587	50.9087	79.5108	55.4519
Tb927.11.6400	38.6373	2.18133	39.0953	35.747	12.0134	28.642	64.1383	59.2712	70.3587	67.2256	87.8466	75.6162
Tb927.7.1820	29.5945	52.3519	46.2035	26.2144	55.8268	28.642	50.3943	73.621	70.3587	54.1721	64.7628	95.7806
Tb927.9.12990	28.7725	28.3573	27.2482	24.6257	26.8534	28.642	49.4781	54.2799	70.3587	45.6873	58.9919	62.1734
Tb927.9.2590	23.8401	23.9946	17.7706	30.1863	24.7334	27.9076	87.961	89.8426	70.3587	82.8898	76.9459	68.8948
Tb927.11.10150	23.8401	23.9946	13.0318	29.3919	24.7334	27.1732	81.5472	86.0992	70.3587	104.428	115.419	77.2966
Tb927.3.1290	36.9932	28.3573	24.8788	46.8682	31.0934	26.4388	98.9562	89.8426	70.3587	93.3326	93.6175	117.625
Tb927.10.14230	23.018	2.18133	26.0635	15.8875	18.3734	26.4388	71.4683	71.7493	70.3587	67.2256	79.5108	94.1002
[truncated: 6,969 more rows]

## Sheet: anota2seq_results
Table S2. anota2seq Results
	Translation		Total RNA		TE		Buffering
ID	log2FC	adjusted p-value	log2FC	adjusted p-value	log2FC	adjusted p-value	log2FC	adjusted p-value	main Regulatory Mode
Tb927.11.10330	-0.808068	0.323553	-0.191678	0.678213	-1.13309	0.228243	-0.506989	0.336983	background
Tb927.11.19800.1	-1.44419	0.0691443	-0.385799	0.49068	-1.73669	0.0806048	-2.24606	0.013528	translation
Tb11.v5.0823.1	-0.498663	0.469038	-0.300199	0.63992	-0.517588	0.517015	-0.997609	0.246667	background
Tb927.10.7650	-0.890013	0.303435	-0.73977	0.411146	-0.819918	0.459729	-0.565375	0.633263	background
Tb11.v5.0802.1	0.178107	0.848543	-0.338945	0.554281	0.390192	0.666776	-0.474487	0.443012	background
Tb11.v5.1004.1	0.136613	0.8856	-0.569017	0.256221	0.839624	0.327108	-0.653429	0.2261	background
Tb11.v5.0397.1	-1.62739	0.0720523	-0.453216	0.314092	-0.577362	0.499732	0.0918029	0.861194	background
Tb927.9.2600	-0.0205848	0.985283	-0.276534	0.590731	-0.187494	0.876704	-0.280924	0.646154	background
Tb11.v5.0439.1	-0.727424	0.291237	-0.227727	0.612506	-0.870718	0.291571	-1.37154	0.0440686	background
Tb10.v4.0245	-0.575384	0.537847	-0.499138	0.347222	-0.863302	0.45812	-0.598689	0.364055	background
Tb927.11.1530	-0.990089	0.192845	-0.404182	0.359117	-1.67153	0.088667	-0.921759	0.110159	background
Tb927.11.19810.1	-0.749877	0.440358	0.409627	0.404116	-0.412336	0.761605	0.294248	0.612158	background
Tb927.10.6890	-0.511144	0.518207	-0.535567	0.323914	-0.498317	0.609072	-0.525348	0.431626	background
Tb11.v5.0581.1	0.331587	0.671792	-0.174502	0.736166	0.434943	0.604698	-0.442507	0.450046	background
Tb11.v5.1045.1	-0.227322	0.771739	-0.438426	0.46544	-0.270351	0.755495	-0.611022	0.416605	background
Tb927.6.3400	-1.10935	0.165917	-0.37209	0.517066	-0.759214	0.356824	0.691117	0.226748	background
Tb927.11.6730.1	-1.4095	0.180985	0.112789	0.828822	-1.18669	0.316683	-0.202846	0.72067	background
Tb11.v5.1005.1	-1.46126	0.147959	-0.603945	0.233469	-3.17328	0.020322	-1.1191	0.0684388	background
Tb11.v5.0576.1	-1.03054	0.186752	-0.686779	0.144696	-3.96224	0.0131274	-0.912834	0.107101	background
Tb927.10.6650	0.2677	0.72206	-0.288658	0.530705	0.40158	0.614812	-0.86201	0.12171	background
Tb11.v5.0622.1	-0.569403	0.534794	-0.41189	0.421593	-1.18788	0.239061	-0.665043	0.259467	background
Tb11.v5.0869.1	-0.321147	0.656441	-0.292611	0.521519	-0.339264	0.67879	-0.473034	0.41242	background
Tb11.v5.1032.1	-1.0633	0.339505	-0.970774	0.14583	-1.35224	0.499145	-1.03889	0.239467	background
Tb11.v5.0820.1	0.217282	0.77858	-0.202823	0.695823	0.266282	0.748268	-1.10014	0.0714103	background
Tb11.v5.0469.1	-0.747225	0.265919	-0.632622	0.191149	-0.711136	0.375045	5.53237	0.0122112	background
Tb927.1.2390	-0.829542	0.218543	-0.67446	0.159762	-0.914113	0.273224	-3.63345	0.0122172	background
Tb927.7.4010	0.633524	0.391167	0.184772	0.703371	0.510154	0.55158	-0.168663	0.7892	background
Tb927.1.2350	-0.712637	0.291151	-0.6334	0.177592	-0.684807	0.396786	0.0300846	0.978082	background
Tb927.1.2330	-0.723744	0.284296	-0.592716	0.187029	-0.650582	0.41619	1.84649	0.0478987	background
Tb927.6.2050	-0.137735	0.87312	-0.27962	0.620034	-0.24628	0.775744	-0.517469	0.371629	background
Tb927.1.2370	-0.724803	0.284611	-0.688219	0.14583	-0.941449	0.26408	-1.45416	0.0850849	background
Tb927.6.520	-1.7359	0.0469057	-0.352639	0.470415	-1.47	0.147208	0.469122	0.511463	translation
Tb11.v5.1046.1	-0.0643296	0.94529	0.141668	0.752696	0.0381017	0.968413	0.0610998	0.90424	background
Tb927.10.10260	-1.82307	0.0402612	-0.626479	0.29375	-1.42591	0.131781	1.82078	0.0327123	translation
Tb927.10.2090	0.0496526	0.958114	0.109405	0.814903	0.123946	0.888227	0.165235	0.727492	background
Tb927.3.2590	-1.29898	0.229525	-0.577433	0.284749	-2.76249	0.0307807	-1.08843	0.0731767	background
Tb927.1.2400	-0.866655	0.206033	-0.735602	0.137833	-0.547342	0.506516	-0.114456	0.901774	background
Tb927.10.2100	0.0724908	0.936937	0.134395	0.76458	0.132101	0.882047	0.180269	0.715842	background
Tb927.10.10250	-1.88688	0.043298	-0.384174	0.417708	-1.28766	0.159336	0.695818	0.206006	background
Tb927.1.2340	-0.849702	0.210456	-0.715946	0.136646	-0.471355	0.553638	0.635033	0.255394	background
Tb927.1.2380	-0.844047	0.217432	-0.678444	0.152042	-0.417453	0.61268	-0.0554486	0.950046	background
Tb927.1.2360	-0.791539	0.242141	-0.641331	0.159003	-0.126391	0.887649	-0.192328	0.73394	background
Tb927.3.5050	0.561116	0.565116	-0.243052	0.529802	-2.53058	0.0468168	-0.203629	0.657046	background
Tb927.2.1180	0.125743	0.90432	-0.544013	0.284631	0.00901008	0.994392	-0.533468	0.38203	background
Tb927.9.2520	1.02506	0.189256	0.309879	0.444585	0.146272	0.876726	0.0708332	0.891972	background
Tb11.v5.1035.1	0.315206	0.677751	0.347238	0.461046	0.49542	0.554581	0.606028	0.313816	background
Tb927.10.8930	-0.0759317	0.9366	-0.458058	0.365706	0.0636846	0.951091	-0.415047	0.476974	background
Tb927.9.7620	-0.246739	0.771739	-0.858168	0.0914886	5.39951	0.00503288	-0.820669	0.135792	buffering
Tb11.v5.0374.1	-0.38586	0.632297	-0.212912	0.669134	-0.189451	0.841954	0.0118431	0.987544	background
Tb11.v5.0468.1	-0.795431	0.233102	-0.706521	0.139803	-0.889663	0.284723	-4.80022	0.00304214	background
Tb927.10.2110	0.00870066	0.992316	0.258032	0.530827	0.0839557	0.929359	0.262799	0.594386	background
Tb927.11.9590	-0.552808	0.429688	0.0800605	0.8558	-0.634172	0.426959	0.599677	0.243806	background
Tb927.4.2070	0.853817	0.2236	0.198799	0.638654	0.675743	0.415082	-0.364441	0.485633	background
Tb927.10.4570	-0.0150404	0.987686	0.127148	0.766215	0.467642	0.57176	0.123739	0.799533	background
Tb927.6.480	-1.69536	0.0458591	-0.137148	0.806265	-1.57365	0.0971089	1.72364	0.02673	translation
Tb927.11.11360	0.338932	0.687148	-0.514279	0.247561	1.48714	0.167193	-0.619927	0.232403	background
Tb927.11.11370	0.497127	0.538647	-0.413162	0.318838	2.27112	0.0501924	-0.523078	0.291548	background
Tb927.4.1800	0.222393	0.802701	-0.0751291	0.871485	0.187014	0.857942	-0.0543105	0.923706	background
Tb927.6.450	-1.60521	0.0564452	-0.188567	0.742614	-1.44493	0.127059	1.41616	0.0582843	translation
Tb11.v5.0755.1	-0.424253	0.553015	-0.696585	0.164043	-1.00251	0.239965	-1.06988	0.0864053	buffering
Tb927.10.15410	-0.926961	0.183151	-0.262235	0.506672	-1.4084	0.135919	-0.443635	0.38053	background
Tb927.11.11330	0.344987	0.6407	0.406507	0.388267	0.547401	0.510745	0.67714	0.294203	background
Tb11.v5.0858.1	0.328835	0.661096	-0.173825	0.749169	0.430081	0.591413	-0.732814	0.172885	background
Tb927.11.2400	2.70641	0.0156194	-0.106433	0.878645	2.62774	0.0391568	2.54366	0.0311863	translation
Tb927.9.10770	-0.266809	0.750793	0.181553	0.673736	-0.327648	0.735579	0.20578	0.684985	background
Tb11.v5.0222.1	-0.429301	0.690318	-0.292016	0.675045	-0.600462	0.631523	-0.438158	0.596145	background
Tb927.10.4560	0.0247697	0.980506	0.211407	0.605526	0.349348	0.744343	0.214514	0.65789	background
Tb927.9.7590	-0.297749	0.701102	-0.868266	0.089865	-1.44594	0.249404	-0.886997	0.116056	buffering
Tb927.10.7180	-0.880648	0.218543	-0.623936	0.196588	-1.58146	0.10081	-1.2771	0.0568513	background
Tb927.9.2470	0.0544539	0.955859	0.1162	0.786215	0.212671	0.805838	0.153373	0.742511	background
Tb927.10.11390	0.630245	0.503303	-0.0672165	0.879603	0.67216	0.57608	-0.0775894	0.884183	background
Tb927.10.10190	-0.269179	0.7358	0.519835	0.302917	0.0455424	0.964271	0.31574	0.570142	background
Tb927.11.2060	0.122053	0.90028	-0.195177	0.61553	-1.49957	0.111536	-0.181229	0.693979	background
Tb927.10.70	-0.521812	0.53006	-0.540815	0.298031	-0.847801	0.396093	-0.687196	0.313816	background
Tb11.0370	-0.440097	0.552039	0.0511077	0.918091	-0.419426	0.633556	-0.0095665	0.989472	background
Tb927.9.6290	-0.452643	0.513671	-0.19449	0.620694	-0.473323	0.557507	-0.228102	0.62771	background
Tb927.11.6280	0.171552	0.845367	0.259729	0.513187	-0.250131	0.799574	0.240323	0.606588	background
Tb927.11.740	0.296096	0.715494	-0.49172	0.251852	0.506695	0.596173	-0.508628	0.322799	background
Tb927.4.1790	0.194456	0.831833	-0.0338421	0.952805	0.187749	0.857562	-0.0169219	0.982319	background
Tb927.8.5260	-0.466961	0.514196	-0.513219	0.233469	-0.0925851	0.935421	-0.444231	0.370348	background
Tb927.7.3330	1.25716	0.11572	0.747596	0.136556	1.04445	0.3518	0.694477	0.246667	abundance
Tb927.10.2560	-1.62301	0.0469057	-0.925805	0.0841809	-2.05303	0.273892	-1.08916	0.144029	abundance
Tb927.11.9710	0.139763	0.8856	-0.0198569	0.970128	0.155781	0.881796	-0.0472545	0.937473	background
Tb927.10.13500	0.555672	0.574071	-0.0825977	0.8694	0.746028	0.457898	-0.228955	0.643387	background
Tb927.7.3550	-0.239192	0.754048	0.0462692	0.924565	-0.227012	0.794592	-0.374885	0.439643	background
Tb11.v5.0399.1	0.277657	0.711287	-0.0772282	0.871927	0.319766	0.695663	-0.487243	0.334981	background
Tb11.v5.0585.1	-0.00349457	0.996904	-0.539237	0.337658	-0.323862	0.699096	-0.543813	0.320268	background
Tb11.v5.0288.1	-0.514348	0.528299	-0.13781	0.734431	-0.704362	0.471538	-0.156423	0.742614	background
Tb11.v5.0436.1	-0.0397883	0.964834	-0.128327	0.805211	-0.0514288	0.958118	-0.179942	0.757356	background
Tb927.11.6510	0.459846	0.566333	-0.358376	0.371746	-0.730768	0.509826	-0.306441	0.506906	background
Tb927.5.1610	0.083677	0.9266	-0.227411	0.558635	-0.124954	0.892388	-0.212376	0.646345	background
Tb927.9.7470	-2.0147	0.0432771	-1.19564	0.0636304	-0.375126	0.831161	-0.639922	0.414938	abundance
Tb927.10.1590	0.319784	0.772119	-0.442194	0.284749	-3.51915	0.0210516	-0.411499	0.389156	background
Tb927.10.190	-0.0391538	0.968946	-0.231222	0.561793	0.287505	0.757239	-0.222339	0.637528	background
Tb927.10.14710	0.142138	0.908932	-0.390745	0.345258	2.43973	0.0741615	-0.409782	0.392658	background
Tb927.11.2050	-0.0384821	0.971472	-0.0369128	0.938523	-0.0726507	0.953726	-0.0379869	0.946547	background
Tb927.11.14020	-0.507009	0.473177	-0.283544	0.508079	-0.598247	0.478664	-0.415647	0.426278	background
Tb927.10.12850	0.317599	0.670626	-0.0812545	0.881084	0.273793	0.740447	0.506254	0.304123	background
Tb927.11.14000	-0.130384	0.901841	-0.300368	0.482168	0.103024	0.935346	-0.288311	0.564126	background
Tb927.11.16200	-0.332963	0.658227	0.162893	0.706731	-0.474769	0.564714	0.337508	0.485987	background
Tb927.10.11540	0.306937	0.752306	-0.312928	0.427995	2.73406	0.0652321	-0.33671	0.468522	background
Tb927.3.1370	0.214096	0.845367	-0.435851	0.286757	-3.98427	0.0186655	-0.417289	0.384236	background
Tb927.5.3800	-0.2238	0.774945	-0.705785	0.136556	1.24782	0.183322	-0.635475	0.216248	background
Tb927.9.15810	-0.427459	0.573872	-0.657485	0.18208	-0.312779	0.741308	-0.628458	0.272901	background
Tb927.9.1850	0.131427	0.883714	-0.559673	0.223969	-0.779924	0.341217	-0.484558	0.325824	background
Tb11.v5.0519.1	-0.635741	0.352396	-0.389444	0.384781	-0.889964	0.28457	-1.36264	0.04436	background
Tb927.10.8940	-0.297629	0.696197	0.0837845	0.848756	-0.356369	0.677018	0.116432	0.818878	background
Tb11.v5.0294.1	0.471532	0.515242	-0.513896	0.230043	-0.560553	0.499732	-0.444332	0.363914	background
Tb927.11.4290	-0.244883	0.788724	-0.335277	0.394994	4.71311	0.00997461	-0.322234	0.484303	background
Tb927.8.6150	0.417421	0.661096	-0.277593	0.500011	-0.525495	0.692463	-0.215834	0.646345	background
Tb927.1.3670	0.644802	0.43994	-0.229735	0.581287	1.04938	0.284108	-0.379726	0.450805	background
Tb11.v5.0881.1	0.465064	0.582004	0.0924647	0.842782	0.514644	0.618449	0.123258	0.823862	background
Tb927.3.1380	-0.370756	0.605522	0.057611	0.91064	-0.414392	0.602402	0.503534	0.31901	background
Tb927.4.1300	-0.0245303	0.978654	-0.094049	0.831933	0.0312744	0.978483	-0.0917799	0.858712	background
Tb11.v5.0410.1	0.633931	0.422571	0.132702	0.7688	0.635701	0.506516	0.134335	0.809424	background
Tb11.v5.1020.1	0.27987	0.759656	-0.590176	0.254961	-0.525557	0.527358	-0.424445	0.405777	background
Tb11.v5.0470.1	-0.890373	0.197213	-0.512585	0.231369	-0.176457	0.845986	-0.116657	0.818761	background
Tb927.9.1810	0.260768	0.765387	-0.524352	0.220486	-3.95392	0.0110468	-0.492132	0.316834	background
Tb927.11.3250	0.514538	0.478502	0.146554	0.715108	0.259652	0.775744	0.0820628	0.872384	background
Tb927.8.3250	0.715531	0.296419	0.489541	0.249212	0.332956	0.716367	0.256251	0.595168	background
Tb927.7.1740	0.176653	0.831957	-0.158028	0.699001	-0.0576141	0.954776	-0.102938	0.836782	background
Tb927.6.4280	-1.50332	0.0469057	-0.929405	0.0920327	-1.62192	0.0926959	-7.04666	0.000876332	translation
Tb927.9.12240	0.312541	0.749041	-0.176971	0.653539	-0.937429	0.404355	-0.158499	0.733954	background
Tb927.11.6180	-0.0505218	0.960945	-0.220829	0.61553	0.34387	0.687377	-0.198057	0.674177	background
Tb927.10.15700	0.0676568	0.944064	0.118646	0.823479	0.118347	0.897695	0.168297	0.765983	background
Tb927.11.3230	0.170138	0.847477	-0.35736	0.373396	-1.04306	0.251945	-0.322584	0.485633	background
Tb927.7.1750	0.708027	0.391017	-0.207333	0.590181	-0.430948	0.686571	-0.180842	0.695439	background
Tb927.10.1450	0.18322	0.851082	0.0432679	0.931171	0.0593872	0.951333	-0.0203239	0.974957	background
Tb927.6.4300	-1.53306	0.0469057	-0.927793	0.0869224	-0.939156	0.267841	1.20112	0.0634688	abundance
Tb927.3.930	0.399236	0.572755	0.157856	0.696985	0.263041	0.760754	0.0912229	0.856376	background
Tb927.9.1750	0.487512	0.493632	0.435582	0.328201	0.349839	0.699797	0.306156	0.592101	background
Tb927.9.6210	-0.29562	0.689426	0.0564475	0.903475	-0.33213	0.684785	0.276328	0.558509	background
Tb11.v5.1044.1	-0.961252	0.277351	-0.169261	0.714759	-0.612745	0.489574	0.16629	0.740855	background
Tb927.7.1730	0.109631	0.916827	-0.251451	0.528305	-0.504718	0.629768	-0.235761	0.616136	background
Tb927.1.120	-0.546829	0.455279	-0.540227	0.275118	-0.764008	0.438574	-0.757415	0.32379	background
Tb927.9.6510	0.641574	0.454659	-0.235094	0.607548	0.810189	0.441033	-0.34255	0.562757	background
Tb927.10.1100	0.804804	0.268915	-0.098818	0.837281	0.672125	0.41139	0.421463	0.389539	background
Tb927.10.6510	-0.0431888	0.96308	0.0970304	0.819696	-0.739321	0.373662	0.100519	0.838452	background
Tb927.6.720	0.396665	0.799442	-0.228528	0.615224	1.46494	0.166862	-0.305288	0.511517	background
Tb927.8.6160	0.315913	0.731365	-0.119021	0.7735	-1.69793	0.131933	-0.111554	0.819223	background
Tb927.10.2840	0.0508666	0.959734	-0.329156	0.404448	2.01575	0.0620531	-0.336279	0.467386	background
Tb11.v5.0981.1	-1.27116	0.0843381	0.126304	0.797704	-1.33987	0.143966	1.2945	0.150627	translation
Tb927.9.2075	0.395843	0.605208	0.22972	0.574125	0.777298	0.355192	0.389064	0.4248	background
Tb927.11.14130	-0.0770952	0.945147	-0.310037	0.447017	0.358105	0.800229	-0.303049	0.527438	background
Tb927.11.2610	-0.115692	0.88879	0.119404	0.78278	-0.0810938	0.930008	-0.279276	0.542686	background
Tb927.4.4620	-0.392376	0.587266	-0.218268	0.569361	-1.78892	0.0829891	-0.238987	0.600875	background
Tb927.11.6500	0.415296	0.561151	-0.116669	0.805823	0.446439	0.595958	-0.239099	0.648668	background
Tb927.6.3490	1.07756	0.201167	-0.255049	0.513872	3.18781	0.0391568	-0.29292	0.526251	background
Tb927.4.3550	0.297326	0.692922	-0.145796	0.71848	0.268253	0.757822	-0.132664	0.78672	background
Tb927.8.1110	0.119801	0.895062	-0.130124	0.757897	-0.00757008	0.994484	-0.115005	0.819072	background
Tb927.7.2640	-0.946196	0.230054	-0.53862	0.233469	-0.61019	0.637251	-0.460598	0.418367	background
Tb927.6.4690	0.000882566	0.998556	-0.123161	0.766614	0.654112	0.415082	-0.123325	0.799202	background
Tb927.2.340	-0.312549	0.666503	-0.351283	0.382386	-0.100922	0.908908	0.166536	0.719264	background
Tb927.11.8200	-0.309122	0.676958	-0.325039	0.456854	-0.0872143	0.924184	0.0634027	0.902519	background
Tb927.11.7900	-0.0761046	0.933706	-0.0034439	0.995158	-0.0796089	0.933104	-0.0356886	0.951032	background
Tb927.11.10340	0.459146	0.503303	-0.469077	0.279593	0.39543	0.619707	2.07209	0.0168442	background
Tb927.10.8430	0.249489	0.772614	-0.247439	0.532445	0.566188	0.569894	-0.275709	0.560958	background
Tb927.10.12710	0.762117	0.268974	0.583152	0.231726	1.14788	0.18566	1.72679	0.02554	background
Tb927.8.1590	0.4665	0.529401	0.500564	0.246027	-0.359375	0.705508	0.386669	0.426291	background
Tb927.11.11725	0.173448	0.830556	-0.192697	0.661307	0.269809	0.745112	-0.521544	0.294101	background
Tb11.v5.0477.1	0.0703358	0.938796	-0.0595741	0.895238	0.13322	0.879154	-0.109327	0.824434	background
Tb927.2.1210	0.118729	0.912814	-0.483349	0.256707	-1.98458	0.0688412	-0.460329	0.345613	background
Tb927.10.6400	-0.243067	0.772119	0.181027	0.645405	0.137167	0.890061	0.165938	0.721698	background
Tb927.1.2100	-1.55846	0.0458591	-1.15584	0.0626021	-1.16508	0.181629	3.41256	0.00367386	abundance
Tb927.11.4300	0.101612	0.934733	-0.290111	0.484953	1.49091	0.120503	-0.310629	0.497467	background
Tb927.1.2470	-0.518256	0.47968	-0.736667	0.144614	0.592058	0.456777	-0.39422	0.406318	background
Tb927.10.4110	0.213423	0.799442	-0.369732	0.437477	0.571639	0.473377	-0.574376	0.260254	background
Tb927.9.15420	0.119333	0.899357	0.0770819	0.891423	0.0474049	0.962064	-0.0323278	0.959681	background
Tb11.v5.0501.1	0.303865	0.723688	-0.32594	0.408065	-1.36835	0.210839	-0.313096	0.494289	background
Tb927.8.1990	-0.527367	0.5237	0.200912	0.610528	-1.32099	0.188214	0.265005	0.569511	background
Tb927.10.5840	-0.35687	0.614862	-0.161138	0.706339	-0.439372	0.582225	-0.840661	0.12776	background
Tb927.6.3150	0.507365	0.47362	0.0273987	0.953753	0.452147	0.576295	-0.159316	0.734115	background
Tb927.11.15880	0.0628849	0.958114	-0.521493	0.223896	-3.58299	0.0398221	-0.515112	0.296724	background
Tb927.3.2600	-0.413955	0.555506	-0.162839	0.68755	-0.462058	0.576578	-0.189458	0.694792	background
Tb927.1.2450	-0.42026	0.580628	-0.633203	0.162666	1.71568	0.135484	-0.530584	0.285336	background
Tb927.9.5690	-0.341162	0.725298	-0.11832	0.801171	-0.154002	0.894228	-0.0518552	0.927494	background
Tb927.4.1000	-1.148	0.117344	-0.52309	0.220486	-0.098474	0.91861	-0.465551	0.342332	background
Tb927.8.6030	0.121224	0.907525	-0.0969953	0.82051	-0.104262	0.930248	-0.0939106	0.849854	background
Tb927.11.11220	0.0617647	0.947464	0.0659549	0.87867	0.0686506	0.942009	0.0698656	0.89168	background
Tb927.10.3930	0.271526	0.765387	-0.355747	0.369338	-6.36353	0.00298068	-0.341206	0.460853	background
Tb927.2.2520	-0.459877	0.510874	-0.133258	0.758699	-0.561737	0.48459	-0.459846	0.366746	background
Tb11.v5.0404.1	-0.0821102	0.93187	0.265687	0.50766	0.274966	0.759548	0.251887	0.592023	background
Tb927.11.2930	-0.569478	0.425957	-0.122809	0.7688	-0.616652	0.458872	-0.141598	0.767054	background
Tb927.2.5760	0.0436709	0.962245	0.370045	0.369881	0.274981	0.762463	0.378471	0.437341	background
Tb927.8.760	-0.603691	0.39399	-0.309008	0.430546	1.84925	0.0725099	-0.251375	0.582524	background
Tb927.10.12260	-1.0446	0.133508	-0.747586	0.124129	-0.487116	0.5406	0.315356	0.500354	abundance
Tb927.9.5040	-0.506733	0.470119	0.0310105	0.95097	-0.545992	0.487409	0.423209	0.377985	background
Tb927.10.9080	-2.34079	0.0432771	0.0450131	0.945364	-2.36725	0.100921	0.453552	0.650656	translation
Tb927.8.7100	0.388863	0.578551	0.104394	0.81696	0.462061	0.563454	0.522317	0.301705	background
Tb927.2.5270	0.195193	0.809609	0.190918	0.640235	0.221481	0.809167	0.20454	0.675185	background
Tb927.9.8070	0.0665085	0.95759	-0.514787	0.247098	-0.211564	0.920051	-0.512603	0.329379	background
Tb11.v5.0546.1	-0.0990097	0.91008	-0.151513	0.741819	-0.117922	0.895463	-0.189451	0.721698	background
Tb927.11.11830	-0.242386	0.76442	-0.471991	0.256707	-1.36873	0.1597	-0.517522	0.296367	background
Tb927.11.17000	-0.0192904	0.98276	0.317052	0.431996	-0.395922	0.654925	0.321247	0.492463	background
Tb927.7.2660	-0.299707	0.76505	-0.633984	0.169977	2.74419	0.0390102	-0.574946	0.254462	background
Tb927.11.3590	-0.0931911	0.935112	-0.313794	0.426002	-2.35661	0.0741615	-0.318189	0.487089	background
Tb927.10.3280	-0.0605331	0.959734	-0.0906028	0.832304	-2.71489	0.0364498	-0.0924045	0.850942	background
Tb927.10.1510	-0.265315	0.7358	-0.0913599	0.833087	-0.572485	0.472067	-0.160063	0.730065	background
Tb927.8.1330	-0.231318	0.843869	-0.00180121	0.997553	-0.231467	0.867296	-0.00661409	0.995411	background
Tb927.7.3680	-0.0601583	0.958114	-0.284712	0.479268	0.166474	0.904822	-0.283144	0.545811	background
Tb11.v5.0825.1	-0.0471672	0.971851	-0.0699167	0.889047	0.196889	0.819884	-0.0564065	0.912697	background
Tb927.4.3950	-1.14831	0.10122	-0.681982	0.143181	-2.46808	0.0390102	-1.20085	0.0615912	abundance
Tb927.11.8160	0.455755	0.515242	0.410944	0.321027	0.96953	0.257406	0.706983	0.184511	background
Tb11.v5.0366.1	-0.164143	0.84218	-0.115192	0.805588	-0.235489	0.788278	-0.284477	0.554947	background
Tb927.4.870	0.189721	0.813397	-0.187819	0.633149	0.283641	0.749244	-0.215134	0.644536	background
Tb927.11.730	-0.622593	0.426358	-0.2649	0.56807	-0.511707	0.584159	-0.126976	0.860142	background
Tb927.8.4780	0.346052	0.629179	0.405586	0.350134	0.422172	0.600788	0.647351	0.24859	background
Tb07.11L3.100	-0.992398	0.158152	-0.765048	0.138944	-0.271434	0.74484	0.263414	0.572403	background
Tb927.11.10025	0.130731	0.892877	-0.247532	0.539357	0.865885	0.294813	-0.291249	0.524856	background
Tb927.1.1930	0.582435	0.390884	0.0549157	0.901692	0.454651	0.5673	-0.171014	0.711465	background
Tb927.11.15450	1.29915	0.0720523	0.548085	0.247931	1.25475	0.162093	-0.66429	0.319515	background
Tb927.11.6440	-0.228696	0.774945	0.284134	0.523094	-0.350917	0.681763	0.398357	0.459773	background
Tb927.1.2510	-0.37558	0.641899	-0.808563	0.129515	0.550732	0.694065	-0.693343	0.213599	background
Tb927.5.1110	0.581011	0.465733	-0.168607	0.683157	1.11264	0.237318	-0.291657	0.531635	background
Tb927.10.3940	0.325242	0.731916	-0.248527	0.529481	0.228903	0.857942	-0.24428	0.606039	background
Tb927.4.2180	-0.116003	0.911379	-0.164528	0.691706	-0.677322	0.459911	-0.188563	0.685771	background
Tb927.10.1500	-0.922997	0.368785	-0.300047	0.492516	0.03814	0.97938	-0.12822	0.803714	background
Tb11.v5.0199.1	0.145881	0.875367	-0.15392	0.705265	-0.13417	0.895608	-0.138814	0.774775	background
Tb927.10.14600	0.00472096	0.996314	-0.16122	0.710552	0.21618	0.836912	-0.162363	0.744241	background
Tb11.v5.0214.1	-0.250119	0.772061	0.151274	0.708885	0.340005	0.692401	0.105843	0.829668	background
Tb927.2.4210	-0.595517	0.380455	-0.163038	0.705152	-0.651823	0.415726	-1.75622	0.0316888	background
Tb927.9.8420	0.0493283	0.96937	-0.320817	0.414338	-9.99712	0.00193302	-0.319316	0.485633	background
Tb927.8.1340	-0.185121	0.869126	0.116395	0.851598	-0.242746	0.847213	0.157104	0.826566	background
Tb927.3.4020	0.550708	0.58988	0.582242	0.194742	-2.55263	0.0638486	0.52414	0.295902	background
Tb11.v5.0650.1	-0.191642	0.813435	-0.0181538	0.970128	-0.16621	0.851754	0.0521947	0.920933	background
Tb927.3.1410	-0.165771	0.839777	-0.0422454	0.929811	-0.222295	0.797497	-0.166076	0.719989	background
Tb927.10.1090	0.500515	0.549402	-0.0720802	0.867767	-0.0155939	0.990507	-0.0426175	0.93651	background
Tb927.7.190	-0.286997	0.704449	-0.36177	0.368218	0.0951203	0.91861	-0.307108	0.511517	background
Tb927.1.2430	-0.378146	0.635407	-0.532007	0.282671	0.193463	0.850133	-0.305113	0.54305	background
Tb927.7.920	0.236843	0.763636	0.229884	0.548969	0.517952	0.538986	0.247164	0.592732	background
Tb927.11.15900	0.203194	0.836124	-0.438275	0.284749	4.49155	0.014087	-0.454489	0.349348	background
Tb927.6.5040	0.419332	0.635011	-0.207586	0.592623	2.08303	0.0578975	-0.258082	0.572587	background
Tb927.7.5180	0.138673	0.877471	-0.172168	0.715388	0.330461	0.68374	-0.296517	0.514658	background
Tb927.11.7620	-0.290944	0.798753	-0.533345	0.238961	-1.9973	0.106846	-0.582128	0.267102	background
Tb927.11.3570	0.41202	0.552735	0.121579	0.776514	0.325364	0.691468	-0.179771	0.701837	background
Tb11.v5.0538.1	-0.273498	0.719116	0.125735	0.81727	-0.313215	0.709074	0.436555	0.462587	background
Tb927.9.15110	0.38088	0.635011	-0.109825	0.806098	0.382959	0.696909	-0.110971	0.836782	background
Tb927.10.6070	-0.0968033	0.926439	-0.039907	0.931602	-0.0600851	0.960486	-0.0389909	0.943238	background
Tb927.9.8740	-0.639753	0.341852	0.152078	0.734431	-0.609821	0.447048	-0.694665	0.240269	background
Tb927.4.1860	0.138285	0.908758	-0.175481	0.664043	0.383356	0.836043	-0.179236	0.705501	background
Tb927.10.5340	0.432274	0.643303	-0.109991	0.810256	0.394159	0.745524	-0.0975933	0.858367	background
Tb927.11.16550	0.0768908	0.932332	0.333659	0.420578	0.118626	0.893368	0.402862	0.419468	background
Tb927.10.7330	0.388817	0.662551	-0.229307	0.559799	1.04884	0.395229	-0.267711	0.567172	background
Tb927.9.12200	0.336815	0.695139	0.0102752	0.985877	0.313215	0.732516	-0.0726332	0.890833	background
Tb11.v5.0567.1	-0.498317	0.471304	-0.389197	0.377566	-0.724601	0.367904	-1.10677	0.0838891	background
Tb927.10.11760	0.282198	0.714625	0.38087	0.366446	-0.174027	0.844324	0.195338	0.674177	background
Tb927.4.3740	0.277527	0.715494	0.441965	0.321027	0.636751	0.426959	0.763469	0.160449	background
Tb927.4.560	0.0958844	0.926439	-0.479608	0.250678	3.63216	0.020322	-0.489446	0.319515	background
Tb927.10.270	0.10584	0.907116	-0.414063	0.307921	1.48244	0.12499	-0.436243	0.367186	background
Tb927.9.11490	0.20123	0.837783	-0.206094	0.610982	0.950641	0.278832	-0.253596	0.582074	background
Tb927.8.910	-0.112532	0.907116	-0.518006	0.245118	-0.356119	0.715811	-0.528556	0.317649	background
Tb927.1.2550	-0.439753	0.560163	-0.859854	0.0923931	0.175263	0.905236	-0.82425	0.148145	buffering
Tb927.1.2530	-0.456417	0.530909	-0.609692	0.234781	0.0488243	0.960789	-0.0770575	0.881491	background
Tb927.10.2890	-0.113025	0.907116	0.12835	0.771712	-0.397734	0.619819	0.177434	0.700689	background
Tb927.10.5030	0.164124	0.869126	-0.124306	0.7688	-0.512449	0.514688	-0.0942216	0.848201	background
Tb927.11.9530	0.0473678	0.959734	-0.0380877	0.935892	0.0896891	0.920591	-0.0622087	0.902621	background
Tb11.v5.0543.1	0.45699	0.550195	0.541855	0.218128	2.1994	0.0503519	0.681968	0.192091	background
Tb927.10.7410	-0.263902	0.753105	0.0779999	0.864564	-0.395748	0.640328	0.176094	0.712782	background
Tb927.1.2490	-0.316562	0.707898	-0.698255	0.177592	0.288662	0.832093	-0.591272	0.293924	background
Tb927.2.450	-0.213865	0.805898	-0.486736	0.307921	-0.761212	0.414539	-0.617553	0.255394	background
Tb927.9.10230	-0.0511621	0.960254	0.183123	0.650967	0.0203226	0.989338	0.181723	0.705141	background
Tb927.8.1890	-0.656671	0.330545	-0.24559	0.530827	-0.595066	0.459473	-0.0635131	0.905686	background
Tb927.9.8130	0.0660163	0.947812	-0.0753797	0.871485	0.195169	0.822222	-0.113207	0.816901	background
Tb927.9.11270	-0.411707	0.550483	-0.0610097	0.896332	-0.429586	0.593207	-0.639926	0.246396	background
Tb927.6.510	-1.93944	0.0318874	-0.544976	0.224722	-1.13404	0.191239	0.713575	0.180531	background
Tb11.01.1680.v5.1	0.541912	0.455279	0.173155	0.702586	0.375615	0.650523	-0.213335	0.666818	background
Tb927.11.10660	1.87354	0.0469057	1.03518	0.101093	0.65722	0.540543	0.146704	0.857155	abundance
Tb927.1.2230	-1.14588	0.100576	-0.771414	0.133078	-1.34096	0.143601	-1.75362	0.0327123	translation
Tb927.11.3600	0.332619	0.684711	-0.351218	0.387578	-0.870278	0.292684	-0.254815	0.576719	background
Tb927.2.6090	0.0103576	0.991554	-0.380139	0.345296	1.39308	0.168242	-0.381537	0.421301	background
Tb927.1.3180	0.467609	0.569123	-0.0970021	0.82453	0.10952	0.914786	-0.0187623	0.976918	background
Tb927.11.10030	0.297407	0.694186	-0.426316	0.292383	-5.59376	0.00452866	-0.406761	0.392274	background
Tb927.10.5480	0.267233	0.738259	-0.738832	0.136556	1.63547	0.0923281	-0.875859	0.11907	translation
Tb927.9.11470	0.26659	0.840452	-0.189877	0.631428	1.24653	0.388177	-0.202005	0.665879	background
Tb927.1.2780	-0.311631	0.809884	-0.173564	0.686425	0.621845	0.478853	-0.121344	0.803866	background
Tb927.8.6110	-0.213859	0.780461	0.0706736	0.869504	-0.206363	0.809946	-0.00610667	0.992921	background
Tb927.8.5580	0.342447	0.632751	0.434079	0.286757	1.38039	0.131781	0.556718	0.266197	background
Tb927.9.15190	0.294242	0.715587	-0.703649	0.14583	-0.841602	0.414364	-0.591095	0.255394	background
Tb927.2.470	-0.442464	0.554328	-0.532232	0.234781	-1.50578	0.108317	-0.748891	0.165734	background
Tb927.8.5120	-0.816173	0.301518	-0.730074	0.175428	0.325553	0.692401	-0.216525	0.637528	background
Tb927.6.2030	-0.588813	0.460466	-0.583433	0.187029	-2.81198	0.0423451	-0.642016	0.21544	background
Tb927.3.3310	0.082311	0.933169	-0.105027	0.821862	0.171596	0.857942	-0.130802	0.803249	background
Tb927.10.7230	0.335181	0.644973	0.322896	0.427995	0.763135	0.349662	0.541169	0.279007	background
Tb927.11.16130	-0.465844	0.529252	-0.152882	0.710453	-0.669215	0.438289	-0.248836	0.600397	background
Tb927.8.3150	0.0249457	0.976883	0.0767096	0.860564	0.152922	0.861293	0.0874857	0.860533	background
Tb927.11.13020	-0.542542	0.442317	-0.165279	0.695842	-0.360355	0.658186	0.247282	0.604943	background
Tb927.9.12650	-0.167688	0.83809	-0.0401321	0.932295	-0.233374	0.788278	-0.133398	0.780773	background
Tb11.v5.0779.1	-0.516101	0.522265	0.0371057	0.938353	-0.350758	0.67879	-0.0578698	0.910434	background
Tb927.7.1050	-0.216718	0.80128	-0.358298	0.369881	-1.43273	0.183322	-0.383763	0.419495	background
Tb927.9.2490	0.263417	0.724901	0.115366	0.792021	0.209087	0.809135	-0.101296	0.841595	background
Tb11.v5.0287.1	-0.0799304	0.932496	-0.312944	0.427995	-1.20828	0.172714	-0.33163	0.474738	background
Tb927.9.11540	0.0114776	0.988982	0.0994719	0.820337	0.0868003	0.924184	0.110686	0.82199	background
Tb927.9.5900	-0.291261	0.693077	-0.0309756	0.953753	-0.278874	0.736295	0.578628	0.274553	background
Tb927.2.560	-0.0347991	0.97032	-0.499117	0.256635	-0.37415	0.645264	-0.530433	0.295614	background
Tb11.v5.0181.1	0.220128	0.81972	-0.319232	0.475705	-0.47966	0.559092	-0.223174	0.62771	background
Tb927.3.3320	0.0329382	0.976094	-0.182419	0.691706	0.304679	0.800229	-0.189569	0.713867	background
Tb927.11.10910	0.177555	0.844299	-0.0845891	0.851996	0.372892	0.643298	-0.159295	0.731148	background
Tb927.11.2690	-0.505604	0.483196	0.213172	0.581893	-0.542267	0.562621	0.220301	0.646751	background
Tb927.11.15100	-0.421801	0.549402	0.0100053	0.985665	-0.438999	0.586154	0.185232	0.690862	background
Tb927.8.6180	0.133616	0.898908	-0.218057	0.579228	0.657194	0.57608	-0.229911	0.625038	background
Tb927.2.2510	-0.57396	0.410075	0.0698613	0.872066	-0.655587	0.419634	0.306933	0.510297	background
Tb927.9.8880	-0.0718878	0.936695	-0.356368	0.402776	-0.164332	0.851237	-0.442064	0.386614	background
Tb927.9.15360	0.0838596	0.928319	-0.163741	0.711676	0.192214	0.829357	-0.225121	0.6449	background
Tb11.v5.1059.1	-0.0305912	0.974297	-0.191087	0.629642	-0.758117	0.349662	-0.198678	0.665489	background
Tb927.11.6200	-0.0324889	0.973497	-0.00358205	0.995954	-0.0311507	0.978745	0.0150019	0.986721	background
Tb11.1420	0.654675	0.339016	-0.00268209	0.995585	0.656689	0.422538	-0.0985049	0.845874	background
Tb927.11.6590	-0.376673	0.630438	-0.101181	0.811332	-0.972093	0.266229	-0.145475	0.756794	background
Tb927.8.2770	-0.487148	0.479002	-0.060538	0.891423	-0.424204	0.59696	0.203359	0.66363	background
Tb927.9.6070	0.0139988	0.990128	-0.320951	0.420462	1.8437	0.188214	-0.321903	0.485633	background
Tb927.6.5120	-0.0640051	0.962521	-0.377277	0.354468	2.73439	0.0679554	-0.370315	0.432801	background
Tb927.9.6250	-0.409005	0.565682	0.123297	0.7688	-0.34369	0.685075	0.0959374	0.848201	background
Tb927.9.8100	0.110237	0.906211	-0.230423	0.564614	0.463339	0.597885	-0.261003	0.578777	background
Tb927.8.6170	-0.724041	0.284611	-0.360399	0.377566	-0.579179	0.467225	0.736657	0.192091	background
Tb927.11.7490	-0.911447	0.208301	-0.626869	0.20965	-1.12608	0.286099	-0.879224	0.208437	background
Tb927.9.2020	0.132684	0.907116	0.0521382	0.913573	0.0669442	0.961345	0.0473966	0.930229	background
Tb11.v5.1034.1	0.468106	0.530374	0.248464	0.52438	0.679105	0.459213	0.262514	0.574901	background
Tb927.10.14820	-0.323383	0.671811	-0.216459	0.587524	-0.736966	0.359515	-0.381438	0.419495	background
Tb927.10.15760	-0.448557	0.522512	0.102395	0.81493	-0.317147	0.696909	-0.244687	0.594806	background
Tb927.11.11820	-0.0241785	0.980395	-0.316613	0.479195	0.337168	0.739534	-0.309196	0.54107	background
Tb927.11.10790	0.225643	0.830418	-0.121562	0.799647	0.393398	0.724415	-0.162618	0.756191	background
Tb927.11.9860	-0.297681	0.68508	-0.184706	0.696287	-0.25847	0.758086	0.362937	0.506396	background
Tb927.2.4710	-0.635173	0.405999	-0.290591	0.49302	-1.06515	0.259464	-0.482929	0.353007	background
Tb927.11.14250	-0.265735	0.735026	0.121998	0.800485	-0.194396	0.829199	-0.0647987	0.914756	background
Tb927.3.3940	0.453797	0.533744	0.125114	0.781144	0.593192	0.469256	0.355974	0.465072	background
Tb927.11.1450	-1.05994	0.129956	-0.394231	0.352441	-0.90913	0.278509	0.75694	0.282555	background
Tb927.9.3990	-0.0244959	0.984977	-0.422258	0.302086	5.20307	0.0141537	-0.420329	0.38053	background
Tb927.4.1100	-0.664243	0.401849	-0.56679	0.196013	-2.49294	0.120919	-0.620369	0.22721	background
Tb927.6.2790	-0.539408	0.448545	-0.259947	0.564614	-0.558662	0.510745	-0.324428	0.619604	background
Tb927.3.1010	0.50879	0.462423	0.318201	0.50307	0.505375	0.528425	0.281153	0.66693	background
Tb927.9.15170	0.400911	0.588421	-0.0720434	0.869504	0.33122	0.714331	-0.0175396	0.977917	background
Tb927.5.1120	1.23736	0.135264	1.31239	0.0519245	1.56779	0.404355	1.3429	0.0674753	abundance
Tb927.11.11475	0.103444	0.911379	-0.28036	0.539357	0.0394024	0.971433	-0.257967	0.641073	background
Tb927.10.1080	0.624228	0.481135	0.0845521	0.8558	0.490767	0.646197	-0.00781561	0.99083	background
Tb11.v5.0756.1	-0.0616806	0.947993	-0.261279	0.515547	-0.315157	0.702182	-0.299039	0.519523	background
Tb927.11.11680	-0.355077	0.616641	0.00857785	0.987522	-0.355484	0.662881	0.0262928	0.971917	background
Tb927.1.4310	-0.512915	0.463165	-0.408643	0.404116	-0.337388	0.682304	0.324633	0.552251	background
Tb11.v5.0493.1	0.99181	0.253457	0.0832308	0.854	1.29769	0.160287	0.32482	0.485633	background
Tb927.11.10160	0.0889805	0.955859	-0.385411	0.375673	1.16956	0.52251	-0.39589	0.433956	background
Tb927.9.3920	-0.0187884	0.98799	-0.483554	0.262355	-2.02874	0.419634	-0.485583	0.334981	background
Tb927.7.300	-0.650278	0.426358	-0.331233	0.426002	0.0749359	0.944555	-0.18795	0.698365	background
Tb927.11.5520	-0.493356	0.469038	-0.183997	0.637476	-0.548957	0.487135	-0.312755	0.511696	background
Tb927.10.520	-0.229469	0.786399	-0.0600851	0.891423	-0.0903569	0.930668	-0.043837	0.935104	background
Tb927.8.7990	0.258913	0.735026	0.23986	0.530827	-0.587163	0.467458	0.20727	0.649332	background
Tb927.11.500	0.851307	0.35248	0.075978	0.871485	0.889377	0.453653	0.110021	0.846869	background
Tb927.11.1900	-0.0836491	0.926439	-0.056004	0.91064	-0.121074	0.891471	-0.154491	0.744241	background
Tb927.9.11410	0.290843	0.769491	-0.30188	0.479268	0.353132	0.804212	-0.307071	0.54305	background
Tb927.11.760	-0.424634	0.561567	-0.113308	0.787084	-1.67338	0.0850227	-0.150185	0.745556	background
Tb927.10.7290	-0.443878	0.536315	-0.139232	0.797389	-0.37425	0.651049	0.362877	0.495346	background
Tb927.10.13040	-1.07925	0.156408	-0.303791	0.452868	-1.14886	0.344752	-0.329769	0.496956	background
Tb927.11.9700	-0.382345	0.589824	-0.548996	0.242715	-0.575433	0.485916	-0.840377	0.161432	background
Tb927.10.5370	0.484319	0.576668	-0.574994	0.238961	-0.600459	0.529527	-0.383525	0.435354	background
Tb927.4.3590	0.156193	0.851082	-0.0418433	0.929135	0.0747145	0.937611	0.00399422	0.995725	background
Tb927.11.7510	-0.137296	0.886124	0.153866	0.699405	0.81025	0.404359	0.150438	0.745556	background
Tb927.11.3000	0.149376	0.864725	-0.445266	0.281242	-1.70001	0.083009	-0.410291	0.389156	background
Tb927.10.14000	-0.0832143	0.929397	0.242648	0.554281	-0.365749	0.652798	0.304887	0.508336	background
Tb927.5.295b	-0.346953	0.677751	-0.0420364	0.930836	-0.334168	0.737294	-0.0329792	0.958674	background
Tb927.9.14370	-0.0404279	0.96937	-0.349452	0.386241	-1.28578	0.239965	-0.356642	0.446435	background
Tb927.10.14840	-0.375699	0.619578	-0.302978	0.443404	-0.835006	0.351222	-0.335718	0.475482	background
Tb927.11.9980	-0.295705	0.697391	0.0962296	0.836127	-0.284307	0.745112	0.0714646	0.899051	background
Tb927.6.4900	-0.291579	0.7358	-0.0878916	0.847821	-0.0936747	0.92372	-0.002379	0.998012	background
Tb927.8.900	-0.626438	0.365902	-0.66343	0.154904	0.00177869	0.998248	-0.404068	0.428668	background
Tb927.6.3740	-0.857898	0.231197	-0.622733	0.197944	-0.44209	0.618449	-0.284046	0.584007	background
Tb927.7.5170	0.239114	0.769787	0.0355849	0.950839	0.261062	0.770173	0.190683	0.719989	background
Tb927.10.7340	0.557723	0.541168	-0.284638	0.468673	-2.59937	0.057985	-0.258064	0.573169	background
Tb927.7.1040	0.0144773	0.9887	-0.220086	0.629632	0.289503	0.793566	-0.224458	0.663865	background
Tb927.11.13125	-0.214205	0.797308	-0.155813	0.705927	-0.105128	0.91291	-0.129237	0.798032	background
Tb927.3.1790	-0.31187	0.684487	-0.0317973	0.950752	-0.268538	0.747864	0.17446	0.709075	background
Tb927.11.2500	-0.563243	0.438159	-0.358536	0.377566	-0.0654545	0.950884	-0.196799	0.694792	background
Tb927.11.1130	2.95777	0.00918541	1.36068	0.0519245	4.48307	0.0401486	1.75546	0.107028	abundance
Tb927.6.4850	-0.493365	0.484703	-0.0845655	0.863371	-0.420688	0.598917	0.477986	0.330697	background
Tb927.2.4230	0.310351	0.676405	0.296757	0.496714	0.173609	0.849108	0.0799994	0.890984	background
Tb11.v5.0456.1	0.202941	0.810427	-0.281978	0.49489	0.747026	0.369447	-0.363885	0.441111	background
Tb927.8.4950	-0.764409	0.257589	-0.41905	0.324431	-0.556921	0.486127	0.64992	0.227504	background
Tb927.7.5020	-0.0419561	0.963681	-0.270871	0.508322	-0.189194	0.852884	-0.278724	0.560958	background
Tb927.6.3750	-0.827292	0.301518	-0.506567	0.263452	-0.00926937	0.994144	-0.280285	0.572587	background
Tb927.4.2040	-1.47383	0.0530312	-0.331559	0.443404	-1.70387	0.0829891	-2.32678	0.0127587	translation
Tb927.7.6850	-1.64853	0.0432771	-0.764348	0.12305	-1.82768	0.0829891	-0.929801	0.117723	translation
Tb927.10.14580	0.126793	0.8856	-0.227791	0.564814	0.185322	0.847768	-0.23369	0.622106	background
Tb927.10.5330	0.322517	0.809284	-0.40966	0.318838	-0.672819	0.851754	-0.40345	0.406587	background
Tb927.8.5600	-0.203316	0.798753	-0.572944	0.246153	-0.433578	0.602302	-0.835141	0.163107	background
Tb927.10.14790	0.306727	0.703371	0.281487	0.479363	1.34956	0.167193	0.342426	0.46203	background
Tb927.11.5190	-0.112011	0.912934	-0.335432	0.432964	-0.432307	0.683118	-0.353143	0.481774	background
Tb927.11.13030	-0.420803	0.549402	-0.206643	0.595139	0.036834	0.969829	-0.0246314	0.967397	background
Tb927.8.1550	-0.83419	0.231892	-0.0332199	0.953753	-0.8383	0.330039	-0.219731	0.743874	background
Tb927.11.6570	-0.0433116	0.962923	0.321278	0.437145	-0.56563	0.479793	0.345068	0.459773	background
Tb927.10.5610	0.08295	0.940963	-0.214578	0.615879	0.556264	0.519226	-0.24266	0.607879	background
Tb927.7.710	-0.153238	0.850481	-0.00533078	0.991785	-0.157113	0.857942	-0.187645	0.684234	background
Tb927.8.5000	-0.230508	0.772614	0.064455	0.901782	-0.246058	0.788724	0.136906	0.815869	background
Tb927.11.1020	-0.821389	0.226813	-0.504556	0.252238	-1.07129	0.225522	-1.2431	0.227504	background
Tb927.7.960	-0.651317	0.341408	0.22158	0.601178	-0.74116	0.367395	0.632853	0.263704	background
Tb927.11.7500	-1.08058	0.143996	-0.490513	0.345296	-1.17503	0.235577	-0.747723	0.479058	background
Tb927.9.14000	-0.00702631	0.995095	-0.0633633	0.891423	0.153252	0.861293	-0.0608037	0.904186	background
Tb927.9.5100	-0.165192	0.860284	-0.327814	0.423141	-0.936198	0.311316	-0.366643	0.441249	background
Tb927.6.4880	-0.450005	0.553862	0.0549026	0.909414	-0.55002	0.512238	0.189561	0.691233	background
Tb927.8.5110	0.687688	0.307621	0.248702	0.541473	0.545016	0.489292	-0.591051	0.256667	background
Tb927.11.2430	1.10423	0.141973	0.273307	0.494703	1.4631	0.15778	0.356637	0.465072	background
Tb11.v5.0537.1	0.364041	0.631428	-0.297157	0.489446	0.600563	0.510751	-0.417646	0.419495	background
Tb927.9.11380	0.160336	0.873021	-0.352552	0.426002	0.728339	0.463076	-0.403531	0.425389	background
Tb927.7.240	0.122293	0.922369	-0.0826457	0.863167	0.162067	0.905638	-0.087235	0.879549	background
Tb927.11.13040	-0.387295	0.578528	-0.0821329	0.851598	-0.443146	0.581469	-0.385362	0.441111	background
Tb11.v5.0349.1	-0.0274469	0.975896	-0.484539	0.245129	7.81145	0.00193302	-0.483104	0.323628	background
Tb927.4.310	-0.308946	0.720901	-0.360679	0.373396	-1.32893	0.400449	-0.405076	0.403423	background
Tb927.8.6750	-0.0531805	0.95759	0.0409457	0.929938	-0.104147	0.911507	0.0422766	0.937306	background
Tb927.11.13140	-0.395222	0.57159	-0.150832	0.714759	-0.307884	0.710514	0.0662686	0.901017	background
Tb927.11.780	1.42329	0.074439	0.239164	0.55245	1.61074	0.141393	0.40569	0.497715	translation
Tb927.7.5210	0.629928	0.381714	0.0402036	0.933987	0.554089	0.485916	-0.254893	0.582417	background
Tb11.v5.1063.1	-0.0214387	0.980506	0.225672	0.574125	-0.116854	0.905734	0.228237	0.636665	background
Tb927.11.15370	-0.0207922	0.980506	0.0796868	0.8558	0.103848	0.905448	0.0664911	0.895115	background
Tb927.6.4890	-0.520426	0.484703	-0.00505604	0.993269	-0.513714	0.513099	0.385669	0.416267	background
Tb927.1.2260	0.0161049	0.987686	-0.654022	0.220011	-0.981369	0.267366	-0.644505	0.218869	background
Tb927.7.3560	-0.313332	0.684711	-0.106909	0.817236	-0.213092	0.812678	0.0433918	0.939039	background
Tb927.11.6300	0.243363	0.765387	-0.459253	0.277146	1.17614	0.202789	-0.533908	0.286687	background
Tb927.7.230	0.172383	0.876444	-0.171042	0.68594	0.355729	0.781394	-0.180859	0.713699	background
Tb11.v5.0627.1	-0.212893	0.791365	0.374572	0.380151	-0.659296	0.412779	0.549377	0.270478	background
Tb927.7.1320	-0.410188	0.570291	-0.212095	0.607902	-0.279086	0.758086	-0.0856889	0.874279	background
Tb11.v5.0182.1	0.0505039	0.959734	-0.1044	0.805823	-0.414769	0.627908	-0.096148	0.845675	background
Tb11.v5.0479.1	0.356632	0.672145	-0.140394	0.742432	0.427448	0.667597	-0.160632	0.745556	background
Tb927.11.9730	-0.254123	0.830304	-0.463064	0.281186	-0.965284	0.671793	-0.474458	0.352961	background
Tb927.7.310	1.19973	0.127865	0.0780672	0.915537	1.24956	0.175493	1.43174	0.122066	background
Tb927.1.4100	0.69064	0.321185	0.750771	0.123649	2.3298	0.0513418	0.903134	0.120341	background
Tb927.8.5640	-0.205496	0.800118	-0.184483	0.691189	-0.207112	0.822447	-0.186972	0.737297	background
Tb927.11.13190	-0.594314	0.39515	-0.435912	0.286757	-1.96728	0.0620531	-0.613127	0.227493	background
Tb927.5.810	1.03771	0.135264	0.497435	0.249049	0.878042	0.293567	-0.226096	0.764818	background
Tb927.3.4360	-0.26687	0.754708	-0.512257	0.250678	-0.483347	0.674539	-0.534685	0.316834	background
Tb11.v5.1051.1	-1.45944	0.301356	-0.191309	0.697403	-0.618889	0.472067	0.127946	0.794855	background
Tb927.10.14830	-0.368142	0.608454	-0.163893	0.696543	-0.309292	0.713748	-0.0635471	0.907158	background
Tb927.10.11970	-1.31409	0.0991243	-0.462421	0.283673	-0.571608	0.564603	-0.212882	0.685538	background
Tb927.11.13090	-0.58367	0.402366	-0.420956	0.304141	-1.5077	0.106846	-0.686535	0.190034	background
Tb11.v5.0489.1	-0.404837	0.63885	-0.476227	0.388267	0.125657	0.894714	-0.179425	0.731148	background
Tb11.v5.0680.1	-0.133651	0.88879	-0.158931	0.711983	0.0150923	0.990507	-0.13624	0.795281	background
Tb927.10.10210	1.38383	0.13618	1.53767	0.0914886	1.2141	0.366204	1.39728	0.204401	abundance
Tb927.8.4970	-0.247366	0.752306	0.26129	0.538429	-0.467059	0.559838	0.518923	0.301705	background
Tb927.8.4980	-0.137344	0.869279	0.0931411	0.838317	-0.169059	0.847768	0.209282	0.665437	background
Tb927.11.10560	0.0807842	0.932332	-0.0222416	0.962654	0.122408	0.895463	-0.0308862	0.959681	background
Tb927.9.13990	0.17295	0.833474	0.0174986	0.975477	0.172559	0.849108	0.0103384	0.989329	background
Tb927.9.6460	0.383833	0.629184	0.325443	0.510712	0.323008	0.745429	0.269329	0.680204	background
Tb11.v5.0655.1	-0.144823	0.863865	-0.0656009	0.879912	-0.188737	0.831538	-0.0865959	0.862943	background
Tb11.0330	-0.0348438	0.973699	-0.274268	0.501598	-0.283878	0.867296	-0.276072	0.562313	background
Tb927.11.13007	0.655119	0.343799	-0.464945	0.262355	2.30048	0.0475382	-0.626941	0.218436	background
Tb927.11.16760	-0.076722	0.934733	0.0512378	0.91424	-0.118618	0.897033	0.0651754	0.901017	background
Tb927.6.4910	-0.167943	0.86415	-0.104383	0.849296	-0.0470371	0.964016	-0.00436989	0.995725	background
Tb927.8.8300	-1.20376	0.178232	-0.713748	0.144696	-0.290359	0.836043	-0.615455	0.293544	background
Tb927.10.12890	-1.01239	0.157367	-0.410158	0.351739	-0.960104	0.303048	-0.309777	0.658045	background
Tb927.11.2860	-0.365549	0.728899	0.286443	0.485513	-1.63855	0.14734	0.33612	0.476974	background
Tb927.5.1830	-0.980701	0.160146	-0.579027	0.196588	-0.205758	0.814012	0.0422695	0.93762	background
Tb927.11.11230	-0.243944	0.802	-0.134989	0.826234	-0.241963	0.836043	-0.132748	0.858268	background
Tb927.3.4270	-0.943155	0.170591	-0.499134	0.284749	-0.714808	0.373252	1.56053	0.0316888	background
Tb927.3.5520	0.0340509	0.97032	-0.0491502	0.917079	0.0382438	0.968123	-0.06234	0.903332	background
Tb11.v5.0732.1	-0.378266	0.614773	0.0204811	0.964697	-0.36446	0.680523	0.0191765	0.976171	background
Tb927.8.6660	-0.47936	0.503303	0.0812423	0.858169	-0.414359	0.619212	-0.0998732	0.859681	background
Tb927.8.2540	-0.171504	0.832262	-0.225442	0.579709	-0.0210304	0.985024	-0.0117584	0.98554	background
Tb927.6.2170	0.187195	0.834577	-0.0517188	0.91064	0.0991559	0.92505	-0.0500536	0.922803	background
Tb927.8.6650	-0.934821	0.170625	-0.323856	0.439193	-1.04208	0.220825	-3.14537	0.00485689	background
Tb927.2.4050	-0.126285	0.885609	0.114841	0.797885	0.0134207	0.990507	0.0681419	0.896697	background
Tb927.6.3800	-0.86252	0.253457	-0.578756	0.247561	-0.672336	0.47594	-0.419565	0.475482	background
Tb927.10.3970	0.510287	0.487498	0.468683	0.274591	-0.587717	0.459213	0.25305	0.579828	background
Tb927.11.13050	-0.598537	0.382285	-0.092193	0.836109	-0.661731	0.415726	-0.446088	0.418708	background
Tb11.v5.0671.1	-0.139742	0.87312	-0.00601917	0.991729	-0.141731	0.879719	-0.022969	0.972765	background
Tb927.3.3130	0.283905	0.708139	0.197258	0.621024	0.144836	0.876483	0.114987	0.820161	background
Tb927.1.600	0.809039	0.309914	0.0659119	0.891336	0.695651	0.448782	-0.153355	0.765631	background
Tb927.6.3500	-0.543361	0.442405	-0.495233	0.247561	0.367001	0.651362	-0.215383	0.637842	background
Tb927.7.2370	-0.7715	0.297109	-0.634818	0.217356	-0.440359	0.675566	-0.359197	0.538511	background
Tb927.7.7400	0.772982	0.300026	0.384527	0.477887	0.57368	0.52017	-0.113688	0.896006	background
Tb927.6.3840	-1.08146	0.13618	-0.493464	0.272537	-1.677	0.0899417	-1.28258	0.0542686	background
Tb927.11.15840	-0.0409504	0.972916	-0.337998	0.436846	0.717025	0.593561	-0.33017	0.500714	background
Tb927.10.5360	-0.0136604	0.990719	-0.325516	0.420462	-2.18164	0.0619563	-0.327312	0.478991	background
Tb927.10.1060	0.206747	0.791076	0.2846	0.485513	0.406159	0.612202	0.489699	0.334828	background
Tb927.6.950	0.288114	0.701279	0.0574568	0.899376	0.238918	0.788278	-0.0434491	0.93762	background
Tb927.5.2080	-0.81	0.233445	-0.114272	0.801171	-0.745074	0.359794	0.592597	0.294203	background
Tb927.11.510	0.215436	0.805318	0.12074	0.786215	-0.058837	0.953385	0.0380693	0.945794	background
Tb927.7.5940	-1.77215	0.0445691	-0.77199	0.18208	-0.981339	0.264102	0.780911	0.177568	background
Tb927.10.10200	-0.546342	0.492766	0.532862	0.263126	0.281849	0.748113	0.261377	0.594806	background
Tb927.6.1020	-0.52612	0.503303	-0.139719	0.752696	-0.305774	0.744093	0.00805081	0.990331	background
Tb927.11.11290	0.249558	0.747642	0.41272	0.387578	0.337217	0.69369	0.563993	0.373487	background
Tb927.11.11520	-0.507653	0.472066	-0.103871	0.809871	-0.442271	0.598917	-0.0331686	0.958674	background
Tb927.6.4870	-0.399125	0.573505	0.0413605	0.937937	-0.431323	0.591094	0.521133	0.295224	background
Tb927.11.14330	-0.185241	0.816036	0.00508408	0.993006	-0.184017	0.833928	-0.143929	0.785869	background
Tb927.2.100	0.103942	0.906313	-0.287082	0.471144	0.0846981	0.930964	-0.284878	0.543241	background
Tb927.11.14920	0.938173	0.293056	0.210445	0.599741	0.140626	0.907202	0.0732204	0.890656	background
Tb927.11.15860	0.23105	0.821273	-0.227951	0.574499	0.754573	0.485916	-0.261778	0.584939	background
Tb11.v5.1060.1	-0.24056	0.79808	-0.301715	0.453358	-0.633545	0.638614	-0.3172	0.50165	background
Tb11.v5.0815.1	0.603889	0.570654	-0.410504	0.618703	0.279608	0.815125	-0.0112993	0.992891	background
Tb927.11.13003	0.731152	0.301518	-0.705514	0.136646	-0.24849	0.839228	-0.617141	0.239106	background
Tb927.4.3570	0.204939	0.795026	0.0273314	0.953753	0.186985	0.832093	-0.0100077	0.987544	background
Tb927.8.2640	0.340409	0.630438	0.105188	0.816701	0.31867	0.69609	-0.616308	0.293924	background
Tb11.v5.0669.1	-0.317573	0.661659	0.178934	0.685706	-0.262852	0.756311	-0.178661	0.737954	background
Tb927.11.2650	0.252194	0.738536	0.237756	0.54087	0.0831856	0.92888	0.142597	0.766642	background
Tb927.3.4290	-0.125645	0.883765	0.200226	0.700645	-0.147912	0.872725	0.242183	0.697277	background
Tb927.3.4310	-0.141521	0.871022	0.252528	0.599741	-0.175696	0.851754	0.285685	0.627571	background
Tb927.3.3460	0.130551	0.879236	-0.167182	0.682566	-0.27104	0.744093	-0.11293	0.816901	background
Tb927.2.4370	-0.530604	0.445625	-0.410804	0.343544	-0.370876	0.65983	-0.0697765	0.903332	background
Tb927.5.1780	-1.13096	0.137356	-0.398613	0.35516	-1.66961	0.102565	-0.820357	0.173465	background
Tb927.8.7980	-0.407806	0.563758	-0.313576	0.433559	0.119569	0.892423	-0.0944868	0.848201	background
Tb11.v5.0693.1	0.0783144	0.934733	-0.293833	0.455586	-0.624651	0.459183	-0.283042	0.540761	background
Tb927.4.4380	-0.207357	0.805898	-0.29365	0.465607	0.592342	0.460887	-0.227158	0.620979	background
Tb11.v5.0243.1	-0.612986	0.509055	-0.227784	0.567268	0.457188	0.658186	-0.136312	0.77822	background
Tb927.11.7840	0.154958	0.85252	0.205826	0.604163	0.318154	0.710057	0.243865	0.609515	background
Tb11.v5.0762.1	0.453461	0.544414	0.0318993	0.947527	0.549116	0.493266	0.157558	0.737716	background
Tb927.3.1840	-0.319493	0.668503	0.0697904	0.886295	-0.369856	0.648118	0.410582	0.40445	background
Tb927.8.7950	-0.222035	0.776313	-0.192777	0.620034	-0.141616	0.876483	-0.182368	0.694792	background
Tb927.11.7630.1	-0.102564	0.958731	-0.242578	0.630647	-0.107955	0.963626	-0.242725	0.693979	background
Tb927.10.9570	0.06663	0.942853	0.0191038	0.969276	0.056398	0.954569	-0.0132537	0.9839	background
Tb927.10.3990	-0.70444	0.297109	-0.498305	0.251852	-0.938883	0.278756	-1.2575	0.0698673	background
Tb927.10.5350	0.402075	0.570291	0.273793	0.496223	0.697365	0.407006	0.408208	0.416267	background
Tb927.6.5130	0.112801	0.936695	-0.315271	0.432079	2.62072	0.0724129	-0.325659	0.482502	background
Tb11.v5.0360.1	-0.595322	0.397158	-0.0303517	0.950752	-0.659626	0.412779	-0.298216	0.51343	background
Tb927.10.8320	-0.303417	0.681156	0.0483543	0.926689	-0.308007	0.711256	0.147201	0.807809	background
Tb11.v5.0713.1	0.026623	0.976094	-0.418397	0.383862	0.0768316	0.943138	-0.421666	0.464615	background
Tb11.v5.0593.1	0.299686	0.68852	0.34577	0.395424	0.195086	0.84578	0.303444	0.545811	background
Tb927.4.2410	0.509088	0.560896	0.273333	0.525683	-0.0511473	0.965181	0.142386	0.781495	background
Tb927.3.5310	-0.733985	0.339505	-0.220581	0.581829	-1.07246	0.300182	-0.334433	0.486211	background
Tb927.7.6090	0.262753	0.735026	0.253547	0.525738	0.615122	0.450608	0.390684	0.41697	background
Tb927.3.4300	-0.0807595	0.933169	0.247868	0.68755	-0.058501	0.956175	0.224345	0.766129	background
Tb927.10.6050	0.220923	0.78363	0.240358	0.570562	-0.0240445	0.98358	0.0778715	0.883223	background
Tb927.9.4680	0.0136714	0.988595	-0.1163	0.797885	0.117667	0.907776	-0.11861	0.820161	background
Tb927.11.880	-0.0308218	0.975896	0.378614	0.368839	-0.642708	0.564684	0.383901	0.435064	background
Tb927.6.4860	-0.296682	0.68659	0.0236197	0.968282	-0.30309	0.710784	0.948079	0.108684	background
Tb927.11.3620	-1.04238	0.380455	-0.479047	0.256635	3.15273	0.0502724	-0.401877	0.403903	background
Tb11.v5.0783.1	0.220499	0.773742	0.0323819	0.94615	0.193269	0.824388	-0.210839	0.6449	background
Tb927.8.1840	0.601683	0.386052	0.111246	0.792267	0.319194	0.705297	0.0467203	0.928762	background
Tb927.1.220	0.28423	0.710558	-0.115291	0.78873	0.217303	0.809946	-0.0769367	0.884183	background
Tb927.10.12680	-0.178443	0.846835	-0.598449	0.177654	-5.03233	0.00641746	-0.619801	0.222283	background
Tb11.v5.1055.1	-0.170899	0.832675	0.375062	0.528305	-0.182872	0.836043	0.476752	0.552251	background
Tb927.10.12840	-0.477703	0.492766	-0.253767	0.530705	-0.344635	0.678432	-0.0186971	0.977917	background
Tb927.10.10900	0.62582	0.442317	0.379294	0.345258	3.25239	0.0354598	0.422855	0.38053	background
Tb11.v5.0556.1	-0.184171	0.826146	-0.0151283	0.975477	-0.252618	0.764166	-0.051614	0.920628	background
Tb927.1.710	-0.801308	0.291151	-0.195201	0.631841	-0.824219	0.392283	-0.207691	0.694792	background
Tb11.v5.1043.1	-1.35175	0.261988	-0.372901	0.381497	-0.502138	0.757822	-0.295727	0.560958	background
Tb927.10.560	0.350203	0.671792	0.0388007	0.942674	0.350638	0.716695	0.0401574	0.952744	background
Tb927.9.15460	-0.664889	0.32424	-0.266615	0.525914	-0.778593	0.338619	-1.44835	0.0439152	background
Tb927.9.13200	-1.50586	0.0574393	-0.663745	0.151968	0.607132	0.450969	-0.218337	0.636296	background
Tb927.11.3390	0.762074	0.285866	0.266305	0.522634	0.376755	0.640574	-0.219681	0.646751	background
Tb927.9.14480	0.252368	0.7358	-0.353615	0.496223	0.232217	0.788724	1.02257	0.150504	background
Tb927.3.4320	-0.0492752	0.958114	0.456483	0.46042	-0.0476165	0.961517	0.447438	0.555015	background
Tb927.9.12590	-0.125542	0.879236	-0.453467	0.354852	-0.10948	0.900551	-0.397886	0.502437	background
Tb927.8.7120	-0.00037645	0.999417	0.162194	0.683281	-2.38461	0.0439559	0.162216	0.72511	background
Tb927.3.4330	-0.350743	0.630438	0.191205	0.666494	-0.458266	0.57608	0.465631	0.399225	background
Tb927.2.4810	0.283288	0.711165	0.487131	0.275118	0.716448	0.38468	0.698184	0.196967	background
Tb927.9.13360	0.646836	0.361194	0.516662	0.262355	0.0845592	0.927935	-0.021397	0.973238	background
Tb11.v5.0566.1	-0.112363	0.908203	-0.28607	0.473143	0.635097	0.532332	-0.273217	0.556048	background
Tb927.7.5000	0.297755	0.762467	-0.149786	0.721372	-0.279795	0.755586	-0.0836051	0.868418	background
Tb927.8.4990	-0.239434	0.754048	0.154672	0.726766	-0.277418	0.737946	0.620197	0.254925	background
Tb927.10.10950	0.600093	0.521724	0.33853	0.454056	1.1688	0.323342	0.474467	0.38601	background
Tb927.6.4480	0.0932736	0.917659	0.120168	0.777516	0.123961	0.893368	0.125881	0.800485	background
Tb927.11.6170	-0.128906	0.877471	-0.160994	0.695793	-0.2017	0.819051	-0.197463	0.674988	background
Tb927.10.10910	0.609483	0.426358	0.435533	0.292383	2.20242	0.0542233	0.571046	0.257646	background
Tb11.v5.0577.1	0.017405	0.984534	-0.136337	0.736994	-0.0435284	0.964016	-0.122063	0.802809	background
Tb927.7.2340	-0.838262	0.2236	-0.28653	0.578316	-0.74167	0.363617	1.24553	0.107017	background
Tb927.5.1810	-0.966159	0.157367	-0.700487	0.169334	-0.91529	0.275616	0.277499	0.627388	background
Tb927.7.5340	1.03953	0.172246	0.864515	0.154419	0.45528	0.649221	0.148175	0.84746	background
Tb927.5.930	-0.350982	0.628196	0.0473179	0.924565	-0.365836	0.658186	0.199847	0.711465	background
Tb927.8.5010	-0.102752	0.908567	0.0841381	0.851598	-0.133166	0.882832	0.103617	0.841595	background
Tb927.11.12850	-0.0318816	0.971851	0.176531	0.660981	0.087548	0.925008	0.165146	0.725722	background
Tb927.7.4900	0.434849	0.535639	0.346228	0.392261	0.817026	0.327108	0.571946	0.262642	background
Tb927.9.1770	0.276769	0.718562	0.375417	0.369881	0.801876	0.324753	0.573286	0.254462	background
Tb927.1.180	0.101045	0.917659	-0.109283	0.804431	0.0870765	0.936647	-0.107477	0.836782	background
Tb927.5.1570	-0.575685	0.596236	-0.234464	0.722043	-0.262494	0.808714	0.0729698	0.91032	background
Tb927.10.9880	0.0319097	0.975896	-0.168488	0.682625	0.817132	0.323342	-0.175139	0.704801	background
Tb927.7.6590	-1.1362	0.297109	-0.890419	0.206181	0.237904	0.826	-0.292062	0.598889	background
Tb927.11.13500	0.135359	0.88481	0.273445	0.486469	7.94281	0.00193302	0.278186	0.543217	background
Tb927.9.8850	-0.083344	0.926439	-0.154842	0.707076	-0.0945044	0.915036	-0.17394	0.718576	background
Tb927.9.12570	-0.15274	0.85364	-0.153984	0.716471	-0.08549	0.927935	-0.091777	0.863428	background
Tb927.9.12630	-0.120129	0.886472	-0.23886	0.559295	-0.142809	0.876548	-0.250445	0.616124	background
Tb11.v5.0741.1	-0.294679	0.701241	-0.263426	0.51247	-0.184234	0.859524	-0.234592	0.627388	background
Tb927.9.5770	-0.431901	0.530909	-0.475444	0.279593	-0.34908	0.667597	0.873977	0.164304	background
Tb927.5.3620	0.400413	0.570291	0.357213	0.380686	-0.0186144	0.987003	0.123917	0.800735	background
Tb927.5.1710	-0.908267	0.183151	-0.499159	0.241665	-1.43555	0.120919	-1.32708	0.0478987	background
Tb927.11.14190	1.01871	0.185712	0.313258	0.427311	0.155179	0.895463	0.263274	0.57493	background
Tb927.11.1710	-0.486897	0.495846	-0.18841	0.643293	-0.389666	0.662561	-0.108765	0.836806	background
Tb927.1.3950	-0.0750101	0.933716	0.273475	0.497745	-0.261749	0.753717	0.382886	0.418708	background
Tb927.7.3970	1.48695	0.0570847	0.381582	0.345232	-0.0727182	0.938499	0.0297536	0.960965	background
Tb927.10.15350	0.00971445	0.992014	-0.51327	0.26095	-0.500091	0.557507	-0.508671	0.329646	background
Tb927.2.5910	-0.852542	0.27498	-0.644527	0.154686	5.44606	0.00755954	-0.5787	0.251113	background
Tb927.11.1480	-2.85807	0.00604271	-1.45399	0.0594143	-2.7099	0.0321086	14.9533	9.4466e-05	translation
Tb927.9.7830	-0.308506	0.677751	-0.220903	0.565712	0.301943	0.718922	-0.152838	0.743778	background
Tb927.11.5440	-0.31948	0.668575	-0.512704	0.307376	-0.6086	0.446689	-1.05687	0.0821576	background
Tb11.v5.1052.1	-1.07004	0.337839	-0.310725	0.604992	-0.567568	0.594451	0.147178	0.810405	background
Tb927.11.15020	0.0596436	0.95759	-0.169341	0.671122	0.0132103	0.992621	-0.169178	0.716247	background
Tb927.6.640	0.681856	0.345513	0.407745	0.353273	0.107017	0.905734	-0.0181928	0.977917	background
Tb927.7.3740	0.301745	0.693077	0.243845	0.549439	0.522285	0.524354	0.375423	0.442405	background
Tb927.5.1660	-0.0748543	0.934681	-0.02042	0.967092	-0.0924698	0.917426	-0.105789	0.829334	background
Tb927.6.1770	-0.299475	0.69667	-0.346007	0.381497	1.72818	0.088667	-0.298615	0.51201	background
Tb927.9.11110	0.183378	0.857312	0.0925014	0.848756	0.0563743	0.96325	0.0524491	0.927494	background
Tb927.6.4000	-0.676321	0.331593	-0.831757	0.0923931	-3.60879	0.0277949	-0.913499	0.108684	background
Tb927.2.510	-0.766682	0.313462	-0.662975	0.223324	-0.754929	0.436886	-0.652976	0.435064	background
Tb927.10.5460	0.3969	0.60429	-0.353712	0.402776	0.115277	0.911571	-0.268707	0.588498	background
Tb927.11.6870	0.0690592	0.942392	0.149852	0.74283	0.208736	0.808331	0.223939	0.625038	background
Tb927.11.14300	0.28757	0.713182	0.0709515	0.869504	0.122973	0.895166	0.0377015	0.946224	background
Tb927.8.2030	0.359146	0.616641	0.329746	0.428066	0.560842	0.485926	0.587885	0.269671	background
Tb927.6.2740	-0.119719	0.8856	-0.352483	0.38511	-0.278625	0.737489	-0.453431	0.361263	background
Tb927.10.3210	-0.664192	0.384568	-0.143416	0.77244	-0.479462	0.554554	0.313248	0.509746	background
Tb927.10.10890	0.459104	0.570542	0.532294	0.233687	1.88173	0.0838005	0.680264	0.196508	background
Tb927.7.4070	-0.256387	0.750793	0.00148313	0.997332	-0.258319	0.770173	0.0950284	0.851454	background
Tb927.10.13000	-0.173697	0.833398	-0.183188	0.645098	-0.488434	0.544194	-0.249719	0.589205	background
Tb927.8.6036	0.0832407	0.942805	-0.198549	0.63515	0.718898	0.379728	-0.223771	0.62654	background
Tb927.3.860	-0.0840987	0.930893	0.0208582	0.963899	-0.252546	0.762463	0.0311893	0.958674	background
Tb927.11.12530	-0.215873	0.779884	0.0211767	0.969649	-0.216022	0.804263	0.032662	0.963832	background
Tb927.3.3580	0.278512	0.716387	0.174278	0.673669	0.0028121	0.996883	0.00143949	0.99898	background
Tb927.6.4840	-0.404074	0.582122	0.116089	0.79819	-0.585796	0.459729	0.368144	0.43305	background
Tb927.11.16730	-0.168223	0.842728	0.121122	0.78278	-0.364317	0.653175	0.216025	0.637842	background
Tb927.6.4440	-0.445918	0.522853	-0.617504	0.231369	-0.277197	0.743008	0.166916	0.759871	background
Tb927.8.2370	0.905639	0.253457	0.415529	0.337299	-0.0783141	0.938499	0.121341	0.809424	background
Tb927.11.6350	0.148937	0.862556	0.171842	0.716824	0.25625	0.762784	0.336165	0.494592	background
Tb11.v5.0624.1	-0.0948908	0.916004	-0.217647	0.63992	-0.154217	0.862682	-0.285566	0.599895	background
Tb927.1.580	-0.0716595	0.943602	0.00469957	0.993496	-0.07478	0.942774	0.0265563	0.969011	background
Tb11.v5.0472.1	0.422344	0.630438	-0.149394	0.741031	0.479616	0.653049	-0.174989	0.74981	background
Tb927.8.6038	0.139166	0.87722	0.147038	0.827054	0.120679	0.900009	0.098591	0.904145	background
Tb927.7.5930	-1.69738	0.0699777	-0.741623	0.181724	-1.79613	0.333544	-0.804699	0.286687	background
Tb927.9.12550	-0.213552	0.802	-0.0763278	0.863831	-0.0200324	0.985315	0.00330911	0.996669	background
Tb927.11.6430	0.435992	0.533744	0.499212	0.284749	0.158102	0.857562	-0.234161	0.621746	background
Tb927.10.8190	-0.07829	0.932332	0.0915627	0.851996	-0.0772774	0.936647	0.0897185	0.881583	background
Tb927.9.15290	0.120611	0.891132	0.233846	0.594378	-0.0428763	0.96564	0.166324	0.745106	background
Tb927.9.11600	-0.20257	0.804993	-0.194356	0.661719	-0.0814488	0.934412	-0.0835584	0.882615	background
Tb927.11.11690	-0.177418	0.847334	0.0964648	0.828822	-0.0699262	0.953057	0.0771378	0.885456	background
Tb927.7.3160	0.41148	0.55102	0.502145	0.249212	0.66509	0.409713	1.22466	0.0582942	background
Tb927.10.2880	0.0841797	0.934733	0.126186	0.76945	0.511836	0.518639	0.150091	0.746014	background
Tb927.2.3800	-0.374001	0.614773	-0.456031	0.304363	0.188308	0.828776	-0.157921	0.734444	background
Tb927.9.5730	0.327526	0.658227	0.357935	0.42232	0.0363171	0.970134	-0.0430873	0.935765	background
Tb927.6.690	1.20892	0.0907246	0.573366	0.188024	11.1953	0.000662678	0.64206	0.210502	background
Tb927.7.3040	-0.0836807	0.926439	0.00918896	0.987192	-0.100067	0.910369	0.0451381	0.931504	background
Tb927.3.1920	0.0865179	0.922969	0.215665	0.576497	-0.32866	0.687116	0.180422	0.695439	background
Tb927.11.1430	-0.898915	0.19445	-0.624075	0.204839	-0.617015	0.455889	0.373729	0.573169	background
Tb927.7.4060	-0.19309	0.807073	-0.0333827	0.953753	-0.206995	0.809167	-0.485799	0.32379	background
Tb927.5.1060	-0.356445	0.614773	-0.136715	0.7688	-0.38813	0.627099	-0.898577	0.193855	background
Tb927.7.2980	-0.727708	0.306188	-0.635822	0.161154	0.459366	0.635535	-0.502011	0.337463	background
Tb927.3.4960	0.862984	0.215339	0.550785	0.251275	0.462406	0.564603	-0.565494	0.270566	background
Tb927.10.4750	-0.87549	0.302795	-0.64621	0.154904	4.2557	0.010822	-0.542676	0.274553	background
Tb927.11.9720	-0.0832916	0.934063	-0.234846	0.546315	0.353155	0.76303	-0.226328	0.627388	background
Tb927.8.1360	-0.0224656	0.978948	0.288099	0.482168	-0.124085	0.894805	0.293626	0.540751	background
Tb11.v5.0740.1	-0.171461	0.848198	-0.543992	0.207601	0.76782	0.566415	-0.537627	0.281307	background
Tb927.10.10920	0.501882	0.557399	0.540781	0.220486	-1.79378	0.0947978	0.436556	0.369528	background
Tb11.v5.0171.1	0.28818	0.711165	0.577623	0.205051	0.912541	0.314232	0.699187	0.19845	background
Tb927.10.10940	0.482181	0.530909	0.412516	0.343717	0.714051	0.467995	0.477685	0.380966	background
Tb927.11.4700	-0.623221	0.396231	-0.436157	0.339884	-1.21005	0.167522	-0.899147	0.110088	background
Tb927.10.11080	0.739829	0.328356	0.703723	0.14583	-0.928599	0.269716	0.399777	0.401596	background
Tb927.9.12360	-1.06379	0.224898	-0.863413	0.0935757	1.00513	0.49844	-0.733706	0.192031	background
Tb927.10.5880	0.257741	0.754708	0.428871	0.435753	-0.0648203	0.945723	0.0867574	0.860864	background
Tb927.2.370	0.261552	0.738536	-0.278342	0.550004	0.0860996	0.927935	-0.0184857	0.978634	background
Tb927.11.1110.1	-0.105595	0.908456	0.216506	0.61516	-0.108903	0.910558	0.217553	0.674	background
Tb927.8.1780	2.08356	0.0269156	0.288361	0.484953	2.10612	0.0638486	0.374519	0.485633	translation
Tb927.11.3240	-0.120222	0.886472	-0.0673497	0.876953	-0.142889	0.874478	-0.075397	0.884183	background
Tb927.10.8780	0.284481	0.703284	0.351639	0.375667	0.966105	0.250161	0.493934	0.315454	background
Tb927.10.280	-0.174803	0.832675	0.198538	0.613669	0.0771287	0.936647	0.163492	0.726773	background
Tb927.9.5860	-0.507503	0.459176	-0.275912	0.570562	-0.463946	0.559838	2.84487	0.00695485	background
Tb927.11.16510	-0.181608	0.82482	0.00560249	0.991785	-0.184446	0.836912	0.0761116	0.889228	background
Tb927.6.4140	-1.03266	0.157209	-0.719397	0.133588	-2.71174	0.0492806	-0.824002	0.150504	background
Tb927.11.980	0.346888	0.65412	0.372953	0.370743	1.12087	0.199105	0.529653	0.286933	background
Tb927.4.2080	-0.196421	0.813188	-0.0721582	0.873234	-0.16199	0.861702	-0.0352735	0.95604	background
Tb927.7.7420	-0.397322	0.58435	-0.0946191	0.833144	-0.238937	0.781938	0.130509	0.78672	background
Tb927.2.4580	-1.06676	0.218927	-0.697894	0.227991	-0.153033	0.882047	-0.0885162	0.888889	background
Tb927.8.2160	-0.99007	0.22116	-0.462585	0.339884	-0.634832	0.55158	-0.204623	0.770273	background
Tb11.v5.0646.1	-0.522117	0.448545	-0.150207	0.735249	-0.471372	0.553666	0.927386	0.125713	background
Tb927.8.710	-0.945246	0.200077	-0.526509	0.223896	0.658254	0.451141	-0.284994	0.539758	background
Tb927.11.12100	-0.309287	0.677751	0.547906	0.229883	-0.526777	0.53177	0.674803	0.217839	background
Tb927.8.6760	0.0469961	0.961795	-0.161372	0.691189	-0.420297	0.676401	-0.155005	0.742511	background
Tb927.6.5070	-0.0799341	0.930183	0.185421	0.659111	-0.0124262	0.991085	0.1196	0.817716	background
Tb927.10.4880	-0.100326	0.909335	0.0175049	0.975477	-0.110398	0.898829	0.162959	0.734752	background
Tb927.5.3510	0.512028	0.470134	0.108163	0.826234	0.4199	0.600308	-0.430657	0.381549	background
Tb927.8.2520	-0.0444238	0.960254	0.288809	0.498833	-0.206186	0.809946	0.366609	0.433946	background
Tb11.v5.0565.1	0.0305082	0.972084	-0.435931	0.335099	-0.14505	0.868996	-0.388121	0.432249	background
Tb927.10.4170	0.439397	0.541588	0.521277	0.248999	1.0887	0.207976	0.841568	0.131112	background
Tb927.5.1900	-0.724684	0.295145	-0.551647	0.250377	-0.47559	0.568934	0.085101	0.89112	background
Tb11.v5.0394.1	0.944685	0.281026	0.301669	0.525683	1.20877	0.291176	0.505264	0.445543	background
Tb927.10.9800	-0.458469	0.512188	-0.247662	0.523094	0.527229	0.502205	-0.134733	0.777617	background
Tb927.10.13800	-0.523484	0.469871	-0.705805	0.136556	-2.96229	0.0493639	-0.761881	0.160449	background
Tb927.3.2960	0.0451825	0.959734	0.537087	0.25752	0.0626222	0.947933	1.14324	0.0807274	background
Tb927.9.12320	-0.439678	0.535278	-0.175792	0.669862	-0.448454	0.593561	-0.185321	0.709182	background
Tb927.11.4950	0.65187	0.344057	0.351258	0.375667	0.721546	0.406069	0.361099	0.442368	background
Tb927.10.13780	1.85921	0.0358174	0.162699	0.696534	1.54251	0.106846	-0.656921	0.230978	translation
Tb927.10.1890	0.127016	0.887617	0.184008	0.6349	2.25657	0.0491717	0.194714	0.670602	background
Tb927.6.5095	-0.271047	0.719192	-0.079971	0.860564	-0.34085	0.67659	-0.327536	0.484398	background
Tb927.11.2410	-0.925418	0.196885	-0.563331	0.205322	0.138523	0.87925	-0.15202	0.747409	background
Tb927.7.7430	-0.312359	0.706039	-0.18354	0.673736	0.027355	0.979636	-0.0281635	0.963372	background
Tb927.9.3400	-0.0671748	0.942392	-0.23903	0.533138	0.468129	0.556265	-0.209407	0.64638	background
Tb927.11.10060	-0.6931	0.32231	-0.328976	0.411401	-0.471357	0.609885	-0.25933	0.584007	background
Tb927.11.13250	-0.0956919	0.916059	0.176286	0.73121	-0.0696498	0.944555	0.137944	0.829334	background
Tb927.4.4730	-1.65209	0.215339	-0.416377	0.375667	-1.92705	0.327108	-0.469066	0.428837	background
Tb927.2.3610	-0.628341	0.437981	-0.498276	0.278981	-0.342788	0.783593	-0.416903	0.443012	background
Tb927.10.890	0.555423	0.569123	0.174741	0.671485	1.08954	0.441067	0.21914	0.64638	background
Tb927.7.3830	0.457523	0.551861	-0.0138724	0.977773	0.533073	0.521937	-0.0687406	0.892403	background
Tb927.11.3730	0.457714	0.544602	0.010767	0.983457	0.416731	0.635297	-0.0271514	0.963832	background
Tb927.11.14880	-0.377413	0.591855	0.333571	0.412772	-0.589417	0.467948	0.590641	0.259695	background
Tb927.11.12880	-0.299757	0.732248	-0.0242151	0.962654	-0.274217	0.789525	0.0278385	0.966255	background
Tb927.9.10790	-0.15227	0.85252	0.163827	0.714759	-0.182881	0.836043	0.26638	0.61033	background
Tb927.11.14780	-0.52997	0.449459	-0.361968	0.400991	-0.819824	0.322511	-0.91925	0.110159	background
Tb927.10.8420	0.176007	0.831128	0.285758	0.479363	-0.00516861	0.99513	0.247747	0.600441	background
Tb927.10.3840	0.565315	0.475176	-0.322439	0.412432	-3.71823	0.0134411	-0.280109	0.54107	background
Tb927.10.3820	-0.229455	0.767246	0.267498	0.508322	-0.540718	0.493533	0.428363	0.376514	background
Tb927.8.5850	-0.223491	0.779254	0.300021	0.454056	-0.0881153	0.933518	0.276814	0.560778	background
Tb927.11.11960	-0.997379	0.218927	-0.464899	0.275118	0.0884414	0.938225	-0.336353	0.499152	background
Tb927.11.11590	0.308851	0.670626	-0.0433426	0.925448	0.296958	0.716367	0.246838	0.594386	background
Tb927.5.700	0.0475254	0.959734	-0.0144307	0.976465	0.0398913	0.967393	-0.00933863	0.988899	background
Tb927.9.10100	0.114553	0.907525	-0.426696	0.335099	-0.6077	0.472067	-0.380187	0.43335	background
Tb927.10.5620	-0.849701	0.231892	-0.49335	0.254961	-0.360481	0.748329	-0.269289	0.605672	background
Tb11.v5.0458.1	0.480482	0.671811	-0.0417373	0.94615	0.554409	0.620197	-0.181836	0.743587	background
Tb927.9.10530	-0.267637	0.718153	0.0281028	0.954166	-0.262938	0.752811	-0.476347	0.351175	background
Tb927.3.2180	-0.580372	0.467088	-0.175408	0.65537	-2.73227	0.0317133	-0.221183	0.628153	background
Tb927.2.5810	-0.397747	0.57159	-0.103134	0.824359	-0.311832	0.702165	0.372465	0.429113	background
Tb927.9.1600	0.710338	0.305324	0.637051	0.164043	0.872037	0.327568	0.691164	0.28402	background
Tb927.11.15910	-0.298089	0.703128	-0.18051	0.654089	0.0953808	0.917426	-0.0766683	0.88178	background
Tb927.1.880	0.562791	0.503706	0.46341	0.275118	2.33185	0.083009	0.55501	0.272901	background
Tb927.10.3790	0.576324	0.553989	-0.0572728	0.91424	0.443733	0.666776	0.0870246	0.873271	background
Tb927.10.6200	-0.420358	0.5494	-0.133677	0.791775	-0.390761	0.632424	0.216316	0.701837	background
Tb927.11.5950	-0.0662562	0.942853	0.520578	0.222224	0.75645	0.351222	0.490078	0.31901	background
Tb927.10.14700	0.24808	0.745125	-0.159037	0.715388	0.151346	0.861293	0.238776	0.602347	background
Tb11.v5.0265.1	0.424808	0.544602	0.136187	0.738368	0.193805	0.826401	-0.0330077	0.956552	background
Tb927.8.980	-0.118932	0.8856	0.206584	0.589794	0.35544	0.65983	0.163566	0.722436	background
Tb927.11.3720	0.545129	0.446074	0.425519	0.350636	0.192152	0.827043	-0.0739651	0.890833	background
Tb927.5.1000	-0.233239	0.786282	0.234718	0.550997	-0.64073	0.499732	0.267522	0.57072	background
Tb927.7.6900	-0.223224	0.776549	0.263244	0.525738	-0.232495	0.797786	0.270541	0.599895	background
Tb927.9.12510	-0.173209	0.848543	-0.0529455	0.914747	-0.136934	0.893368	-0.0309689	0.962043	background
Tb927.3.2230	-0.224541	0.77858	0.106904	0.807133	-0.374298	0.646197	0.224757	0.62771	background
Tb927.3.5490	-0.173846	0.831957	-0.201355	0.644443	-0.245259	0.784642	-0.307157	0.54729	background
Tb11.v5.0649.1	-0.301925	0.681156	-0.151111	0.705158	-0.662843	0.414364	-0.179561	0.696685	background
Tb927.4.2030	-0.715869	0.305482	-0.22045	0.631057	-0.601437	0.468235	0.309229	0.612736	background
Tb927.11.14080	-0.472481	0.596236	-0.376406	0.420578	-0.297074	0.806202	-0.329906	0.557743	background
Tb927.11.1090	0.724034	0.335247	0.712589	0.159762	1.64377	0.124874	1.06825	0.105434	background
Tb927.10.13250	0.265333	0.720158	0.394907	0.336245	0.392672	0.621688	0.847454	0.128333	background
Tb927.9.12610	-0.0859187	0.922969	-0.00686985	0.99104	-0.0815471	0.929359	0.117013	0.810502	background
Tb927.9.4230	0.417434	0.588124	-0.0293822	0.950858	0.0694511	0.941254	0.0039136	0.995725	background
Tb11.v5.0531.1	-0.807035	0.300026	-0.494401	0.272537	0.315136	0.699096	-0.138841	0.767467	background
Tb927.10.10960	0.478509	0.508762	0.343593	0.408065	0.475064	0.606655	0.341988	0.493508	background
Tb927.7.2680	-0.889089	0.199297	-0.375106	0.362292	-1.26502	0.158685	-0.982289	0.0986485	background
Tb927.2.3780	-0.0741637	0.934893	-0.0469919	0.918368	-0.282252	0.732617	-0.0630298	0.901017	background
Tb927.11.7600	-0.363337	0.613189	-0.302933	0.494703	-0.363229	0.668025	-0.302621	0.611843	background
Tb927.11.16890	-0.0997509	0.914042	0.375973	0.422229	-0.409798	0.615859	0.470437	0.356439	background
Tb927.4.1540	0.144184	0.864725	0.177277	0.702871	0.0224031	0.984033	-0.0164126	0.978634	background
Tb927.10.14470	0.000219272	0.999476	0.0814597	0.850917	0.0243242	0.982363	0.0815611	0.872384	background
Tb927.8.4870	0.0982675	0.916004	0.357663	0.380097	0.511335	0.577863	0.378404	0.43305	background
Tb927.2.1810	0.406865	0.554926	0.206115	0.600736	0.568444	0.472067	0.661165	0.204401	background
Tb927.11.6140	0.0823037	0.941393	-0.439059	0.328927	0.344478	0.788724	-0.447312	0.403903	background
Tb11.v5.0242.1	0.295765	0.695139	0.286821	0.463363	1.51188	0.128087	0.329007	0.476974	background
Tb927.7.6420	-0.111449	0.908932	-0.088652	0.839595	-0.160843	0.878783	-0.0924804	0.85604	background
Tb927.1.1710	-0.211901	0.784481	0.0125753	0.98142	-0.201951	0.815125	-0.158358	0.741994	background
Tb927.8.1050	-0.0551982	0.95529	0.156792	0.699047	-0.312331	0.701984	0.188932	0.680136	background
Tb927.5.4220	0.531784	0.550142	0.266391	0.531827	0.325457	0.785968	0.218073	0.688684	background
Tb927.5.760	0.973206	0.157209	0.917976	0.0841809	1.70266	0.0829891	2.11639	0.0150979	background
Tb927.10.12700	-0.237066	0.772592	0.348972	0.42232	0.068861	0.947996	0.247939	0.621746	background
Tb927.11.11010	-0.80424	0.238298	-0.215178	0.661307	-0.76838	0.351679	0.38222	0.636524	background
Tb927.8.870	0.265575	0.750749	-0.182043	0.650967	-0.235709	0.793468	-0.108023	0.826863	background
Tb927.7.6640	-0.192787	0.808901	0.0252559	0.957926	-0.157552	0.857942	-0.0877081	0.860211	background
Tb927.6.3090	0.466461	0.507146	0.195635	0.613831	-0.583875	0.468235	0.118655	0.8069	background
Tb927.7.830	0.19941	0.805907	0.19612	0.6349	0.057888	0.955188	0.118861	0.818364	background
Tb927.11.7460	0.0302994	0.976094	0.223122	0.575314	-0.549138	0.569894	0.218461	0.641634	background
Tb927.9.5320	-0.261703	0.765387	0.0392824	0.934287	-0.413802	0.605948	0.104032	0.832262	background
Tb927.9.5960	-1.0627	0.135264	-0.606237	0.220486	-1.27009	0.166158	-1.33896	0.0902895	background
Tb927.8.3530	-0.445937	0.53006	-0.209293	0.611025	-0.693151	0.388201	-0.584964	0.246667	background
Tb927.9.3170	0.00232852	0.996904	-0.373223	0.352466	-0.853261	0.406555	-0.372725	0.431626	background
Tb927.5.2940	1.02727	0.136611	0.352332	0.387578	1.05903	0.21855	0.695665	0.24859	background
Tb927.6.700	0.294932	0.743439	0.221761	0.631428	0.0639051	0.958118	0.122967	0.831039	background
Tb927.3.5530	0.240943	0.802	-0.0118605	0.982471	0.273242	0.793468	-0.0453103	0.934284	background
Tb927.6.2640	0.539465	0.450243	0.148159	0.714403	0.693793	0.419634	0.237434	0.622635	background
Tb927.11.7560	-0.13581	0.874853	0.308928	0.456536	-0.0222897	0.985315	0.279553	0.571667	background
Tb927.10.180	-0.380534	0.585815	-0.22139	0.571507	-0.483856	0.562251	-0.376071	0.435354	background
Tb927.11.11480	-0.244411	0.756198	0.193439	0.695449	-0.124591	0.887049	-0.163779	0.731148	background
Tb927.11.10540	-0.490778	0.477196	0.138303	0.805058	-0.527185	0.504665	1.3718	0.0621049	background
Tb927.11.12420	-0.00819712	0.993363	0.194186	0.61553	1.70974	0.083009	0.193362	0.671898	background
Tb927.7.6770	-0.0548738	0.958114	0.100542	0.820337	0.0934166	0.928207	0.0909811	0.859681	background
Tb927.6.4990	-0.522426	0.463165	-0.158933	0.696543	-0.171026	0.849108	0.0191373	0.97634	background
Tb927.11.12840	0.664554	0.32515	0.590699	0.197065	0.305279	0.70892	-0.501915	0.307368	background
Tb927.6.620	0.481153	0.503303	0.455526	0.281336	1.07289	0.251726	0.605518	0.247284	background
Tb927.11.14680	0.563874	0.585815	0.376658	0.349779	3.34227	0.11702	0.400252	0.403903	background
Tb927.10.5010	-0.0459797	0.959734	-0.0935685	0.832304	-0.0806361	0.930541	-0.193037	0.674816	background
Tb11.v5.0657.1	0.466086	0.582399	0.0432399	0.926359	0.705956	0.415726	0.106278	0.829334	background
Tb927.10.8390	1.06697	0.132191	0.46267	0.272506	1.68421	0.0849115	1.10064	0.0745727	background
Tb927.11.14165	1.81037	0.0648505	0.704412	0.14583	-0.151441	0.922724	0.399778	0.434066	abundance
Tb927.9.13380	0.0173246	0.984567	-0.3809	0.345296	0.435826	0.586569	-0.396297	0.403903	background
Tb927.6.2490	0.0167152	0.984839	-0.100099	0.836109	0.089012	0.920879	-0.123033	0.799533	background
Tb927.4.2060	-0.141758	0.864725	0.145871	0.770736	-0.129623	0.882552	0.0198179	0.978634	background
Tb927.11.3980	-0.644251	0.376547	-0.128461	0.77244	-0.721743	0.413305	-0.255165	0.621587	background
Tb927.7.290	-0.710969	0.321185	-0.16206	0.722557	-0.553163	0.49378	0.350366	0.485633	background
Tb927.7.6980	-0.141618	0.866144	0.0908426	0.845438	-0.0774209	0.934412	-0.0906106	0.856376	background
Tb927.10.9830	-0.628014	0.439217	-0.233201	0.562019	-0.480842	0.687116	-0.197818	0.688944	background
Tb927.9.9290	-1.52423	0.0679623	-1.47896	0.0519245	0.669749	0.453653	-0.641872	0.257646	abundance
Tb927.4.1500	0.113802	0.893453	0.394494	0.344975	0.169842	0.849108	0.413611	0.405961	background
Tb11.v5.0505.1	-0.487433	0.534359	-0.553197	0.302673	-0.771525	0.450608	-0.764171	0.254091	background
Tb927.11.5940	-2.16346	0.0378037	-1.72064	0.0519245	0.352937	0.836043	-0.574048	0.303936	abundance
Tb927.11.900	-0.125978	0.883497	0.232619	0.600736	-0.115487	0.899703	0.224366	0.676596	background
Tb927.2.5160	0.685606	0.38152	0.381492	0.354468	1.00616	0.472067	0.429318	0.406881	background
Tb927.5.4230	0.631269	0.431842	0.103934	0.839409	0.656008	0.491791	0.165592	0.819072	background
Tb927.8.4580	0.275555	0.71491	0.306119	0.43937	-0.206029	0.811213	0.154305	0.741468	background
Tb927.11.1150	1.09898	0.156163	0.253909	0.537943	0.540106	0.502161	-0.206039	0.659675	background
Tb927.6.4920	-0.184895	0.82482	-0.0531819	0.928794	-0.172794	0.851119	0.0396051	0.959834	background
Tb927.3.5440	0.509176	0.509299	-0.157929	0.71183	0.155534	0.858202	0.0692667	0.89168	background
Tb927.8.3380	0.497209	0.541588	-0.0647353	0.885947	0.695971	0.433935	-0.160571	0.735987	background
Tb927.11.16480	-0.594152	0.380455	-0.690217	0.143181	-0.556778	0.481712	-0.38264	0.441495	background
Tb927.7.1340	-0.428903	0.578584	-0.0525759	0.917528	-0.331573	0.684713	0.171093	0.712696	background
Tb927.9.11050	0.727312	0.312911	0.0450525	0.92624	0.678225	0.430112	-0.149289	0.799533	background
Tb927.4.3810	-0.221931	0.771739	-0.527026	0.238961	-0.284925	0.731041	-0.984884	0.107017	background
Tb927.11.5820	-0.753699	0.26367	-0.229716	0.554775	-0.880487	0.291176	-0.698844	0.205201	background
Tb927.4.2530	-0.658805	0.34852	-0.492687	0.267475	-0.63145	0.521941	-0.472541	0.386864	background
Tb927.10.8170	0.320515	0.673059	-0.0293495	0.953753	0.363009	0.653049	-0.243086	0.596119	background
Tb927.11.16660	0.612409	0.397158	0.00639173	0.991365	0.603738	0.470979	-0.174174	0.717667	background
Tb927.6.4980	0.1773	0.864725	-0.225237	0.562532	-0.293359	0.800229	-0.218276	0.637842	background
Tb927.6.4500	-0.474193	0.54559	-0.434852	0.284749	-4.89959	0.00958834	-0.453346	0.349725	background
Tb927.9.9210	-1.18969	0.115891	-1.75902	0.0519245	0.0275504	0.982009	-0.38159	0.470531	abundance
Tb927.10.1390	-0.387654	0.602983	-0.0860719	0.846055	-0.196599	0.824658	0.0551707	0.91548	background
Tb927.10.15180	0.0252821	0.976094	-0.0189274	0.96942	0.0392949	0.967452	-0.0381049	0.946049	background
Tb927.8.6060	-0.465337	0.503303	-0.231203	0.556669	-0.383378	0.640328	-0.140342	0.777845	background
Tb11.v5.0616.1	0.16106	0.841731	0.362319	0.367212	0.090136	0.919977	-0.316117	0.490278	background
Tb927.11.6460	-0.139108	0.869279	0.272661	0.565712	-0.13914	0.877647	0.272729	0.639825	background
Tb927.7.4170	-0.295188	0.703876	-0.182308	0.672304	-0.046468	0.962064	0.0294801	0.960965	background
Tb927.10.10970	0.607328	0.414089	0.587644	0.241073	1.19245	0.196569	1.08691	0.0882814	background
Tb927.10.8000	0.164011	0.840557	0.364086	0.357344	2.23467	0.0497079	0.383999	0.417475	background
Tb927.10.310	0.249039	0.761409	0.000507739	0.99898	0.248105	0.772917	-0.119886	0.806452	background
Tb11.v5.0197.1	0.181602	0.829779	-0.0895091	0.879538	0.224491	0.799431	-0.334881	0.533915	background
Tb927.10.13490	-0.0926406	0.916004	0.124804	0.769947	-0.0358637	0.97059	-0.0588491	0.907896	background
Tb927.11.13670	0.403742	0.573505	0.188649	0.626235	-0.340689	0.756311	0.168193	0.716775	background
Tb11.v5.0337.1	0.0589069	0.950285	-0.0842009	0.849921	0.133513	0.878588	-0.149923	0.746014	background
Tb927.11.15990	0.0965693	0.911928	0.172993	0.688405	0.118073	0.894805	0.224678	0.653836	background
Tb927.10.10000	-0.686617	0.347541	-0.246795	0.570562	-0.472543	0.592604	0.0452113	0.940208	background
Tb927.10.720	0.405599	0.677751	-0.104824	0.820676	0.574037	0.602189	-0.155653	0.764818	background
Tb927.11.2370	0.300746	0.715494	-0.123153	0.848756	0.216065	0.80805	0.237661	0.646751	background
Tb927.11.4380	0.583161	0.434517	-0.0947294	0.829448	0.847555	0.306858	-0.291568	0.525443	background
Tb927.11.14090	-2.01932	0.042697	2.80033	0.144696	-2.06959	0.131781	3.17572	0.572587	translation
Tb927.7.5230	-0.810666	0.238164	-0.427891	0.375667	-0.726492	0.399012	0.030128	0.971917	background
Tb11.v5.0767.1	0.574533	0.465733	0.403783	0.368839	0.64861	0.499732	0.433613	0.450046	background
Tb927.2.5540	1.54197	0.085208	0.673177	0.233595	1.03482	0.326396	0.142711	0.890833	background
Tb927.10.8590	-0.468205	0.636965	0.04711	0.921806	-0.21214	0.815963	-0.0309586	0.959606	background
Tb927.7.7470	-0.825823	0.354784	-0.24802	0.584528	-0.842352	0.488634	-0.257739	0.64638	background
Tb927.10.3020	0.879818	0.39399	0.0768246	0.863371	0.559266	0.640574	-0.00235153	0.998129	background
Tb927.11.6130	-0.00214317	0.996976	-0.212404	0.582822	-1.02864	0.225664	-0.212843	0.640951	background
Tb927.5.1090	-0.393019	0.574071	-0.00515806	0.991785	-0.428505	0.593863	-0.0454634	0.93084	background
Tb927.8.4500	0.921349	0.181225	0.0761507	0.873732	0.879277	0.291176	-1.12	0.106775	background
Tb927.7.1910	0.456796	0.526702	0.0330936	0.946466	0.49682	0.54354	0.222906	0.65789	background
Tb927.3.1900	0.43898	0.549428	0.247131	0.536295	0.678804	0.438574	0.343848	0.481284	background
Tb927.8.6000	0.387803	0.591978	0.313139	0.436895	0.958032	0.257406	0.491714	0.319515	background
Tb927.10.7930	0.289441	0.692922	0.201982	0.661307	0.260561	0.755313	-1.23773	0.0639132	background
Tb927.8.730	-0.905554	0.227833	-0.636612	0.18208	0.0428068	0.969679	-0.324962	0.506891	background
Tb927.11.11900	-0.11218	0.90218	0.42287	0.301559	0.491466	0.609097	0.413238	0.390843	background
Tb927.8.6940	-0.0148601	0.986005	0.160534	0.695449	0.234737	0.788278	0.152695	0.743874	background
Tb927.3.1620	0.386967	0.576024	0.202348	0.672882	0.411308	0.605973	1.3231	0.0815701	background
Tb927.10.8630	-0.567732	0.422485	-0.260324	0.517066	-0.802685	0.333544	-0.512268	0.327624	background
Tb927.10.540	0.17557	0.844099	-0.117011	0.78278	-0.179077	0.849108	-0.0883303	0.860211	background
Tb927.11.6680	-0.0499457	0.958114	0.132061	0.798749	0.0174611	0.987694	0.0383685	0.945327	background
Tb927.8.5470	-0.847453	0.23165	-0.55485	0.220011	-0.113901	0.900551	-0.156954	0.759018	background
Tb927.10.15750	0.733472	0.297109	0.625545	0.18208	-0.168518	0.849108	0.163985	0.724626	background
Tb927.8.5100	0.671689	0.377958	0.463186	0.286757	0.73565	0.452019	0.480772	0.365855	background
Tb927.7.2330	-0.430449	0.62299	-0.575932	0.197944	-0.38985	0.740223	-0.57441	0.272459	background
Tb927.9.1980	0.171528	0.85252	0.176757	0.711403	-0.032211	0.976612	0.0831196	0.88154	background
Tb927.11.6250	-0.381865	0.619074	0.0491477	0.918351	-0.355674	0.696013	0.0145373	0.982927	background
Tb927.2.4520	0.213695	0.802	0.0585686	0.898692	0.137597	0.886023	0.0202584	0.975959	background
Tb927.8.6790	0.389446	0.57478	0.226167	0.557467	0.11992	0.892423	0.0941732	0.848834	background
Tb927.8.1870	-0.0360427	0.969057	0.152006	0.71183	0.0790637	0.933104	0.121084	0.805914	background
Tb927.10.7860	0.926178	0.18006	0.474824	0.263126	0.30104	0.712256	-0.227247	0.619095	background
Tb927.9.9640	0.294133	0.713182	0.302255	0.508764	0.645554	0.419742	0.552304	0.269671	background
Tb927.4.2740	-0.269777	0.766772	-0.143786	0.805823	-0.226844	0.834845	-0.0855496	0.908493	background
Tb927.7.2870	0.0789855	0.933716	0.373855	0.375667	0.613975	0.459183	0.421264	0.384236	background
Tb927.11.14950	0.157114	0.866144	0.147449	0.711954	1.11874	0.196391	0.170435	0.712659	background
Tb927.3.1190	0.238952	0.771375	0.235697	0.539878	-0.402268	0.659416	0.210259	0.646751	background
Tb927.10.14990	-0.341931	0.630438	-0.238761	0.594378	-0.289342	0.726082	0.416473	0.443012	background
Tb927.8.2820	-0.0315232	0.971851	0.31529	0.508322	-0.220257	0.798839	0.364772	0.441111	background
Tb927.11.16280	0.111689	0.919805	-0.215548	0.614237	0.459085	0.667986	-0.236772	0.633707	background
Tb927.10.12500	-0.281784	0.715587	-0.0955744	0.834819	-0.172219	0.847768	0.0573029	0.91406	background
Tb927.2.2260	1.0814	0.135264	0.563526	0.204839	2.10497	0.0578072	0.994105	0.0942367	background
Tb927.11.6040	-1.36378	0.0648505	-0.654997	0.18208	-1.33986	0.156839	-0.436506	0.543217	background
Tb927.11.4030	0.337809	0.74474	0.0427091	0.932601	0.436915	0.685075	0.100951	0.848484	background
Tb927.2.1760	-0.457818	0.546721	-0.0381261	0.937069	-0.475478	0.600638	-0.0532068	0.920624	background
Tb927.5.1820	-0.714538	0.299049	-0.950365	0.0800644	-2.19418	0.0589223	-1.32589	0.0478987	background
Tb927.9.5620	-0.212748	0.784481	-0.0658518	0.925049	-0.212305	0.808832	-0.046182	0.961683	background
Tb927.11.7685	0.198492	0.842333	-0.14333	0.81842	0.084953	0.939427	-0.0313461	0.968716	background
Tb927.11.9400	0.227762	0.771739	0.394739	0.525738	0.138337	0.877647	-0.0573164	0.948984	background
Tb927.9.5650	-0.0852185	0.922969	-0.264575	0.668855	-0.0960338	0.913798	-0.697175	0.34487	background
Tb927.9.13785	-0.637507	0.341852	-0.130723	0.7688	-0.598505	0.453653	1.44127	0.0594672	background
Tb927.11.2490	0.0908911	0.917758	0.282596	0.534218	0.191354	0.826551	0.523862	0.294203	background
Tb927.7.2650	-0.537612	0.516927	0.0211767	0.97553	-0.561565	0.481549	0.479092	0.341651	background
Tb927.5.1680	-0.128681	0.880779	-0.448338	0.301509	0.475588	0.55158	-0.354938	0.445543	background
Tb927.5.440	-1.07925	0.141973	-0.667325	0.169961	-0.0375199	0.9691	-0.000758666	0.999173	background
Tb927.11.750	0.052531	0.959103	-0.110798	0.794258	-0.108139	0.914786	-0.109163	0.824434	background
Tb927.7.7100	-0.354564	0.617379	0.0382367	0.936578	-0.31794	0.696275	-0.322808	0.483741	background
Tb927.4.4490	-0.641363	0.343331	-0.240306	0.533771	-0.892398	0.291571	-0.46857	0.34487	background
Tb927.4.2220	0.228071	0.769491	0.358489	0.420578	0.443301	0.580479	0.689482	0.195507	background
Tb927.11.890	-0.160815	0.863436	-0.138692	0.7688	0.0602002	0.951333	-0.0449304	0.93345	background
Tb11.v5.0510.1	0.244509	0.76442	-0.212226	0.639739	0.247875	0.793972	-0.215888	0.698365	background
Tb927.7.6300	-0.674633	0.329279	-0.0247911	0.957848	-0.517261	0.510745	0.0781102	0.877992	background
Tb927.1.570	-0.741003	0.290638	-0.0500391	0.928624	-0.737931	0.38326	0.0338029	0.974981	background
Tb927.8.6640	0.00851255	0.995868	-0.607235	0.196588	2.99368	0.141393	-0.608354	0.245956	background
Tb927.5.1790	-0.810514	0.329659	-0.34181	0.398376	-0.255137	0.878056	-0.291985	0.547344	background
Tb927.5.2020	-0.0562356	0.96937	-0.0793391	0.871564	-0.342441	0.699797	-0.0935784	0.851186	background
Tb927.11.12210	0.295191	0.705723	0.143474	0.722557	0.707403	0.385719	0.235838	0.607723	background
Tb927.5.4210	0.506985	0.536633	0.0988895	0.867817	0.519812	0.60405	0.144519	0.861128	background
Tb927.11.5960	-0.0380733	0.968788	0.479526	0.308978	0.310151	0.703798	0.427207	0.375624	background
Tb927.10.13710	0.582506	0.456582	0.299502	0.445747	-1.5969	0.0955242	0.222854	0.627232	background
Tb927.2.5980	0.36656	0.614286	0.473941	0.251852	2.20195	0.0504309	0.536162	0.279007	background
Tb927.11.13280	0.0345195	0.97032	0.134855	0.745147	-0.00432539	0.995367	0.115489	0.816901	background
Tb927.10.10980	0.409693	0.594116	0.667103	0.191964	0.725975	0.510745	0.776756	0.218436	background
Tb11.v5.1054.1	-0.529508	0.636965	-0.0791611	0.856293	-0.0317162	0.984214	-0.0365995	0.949475	background
Tb927.9.9450	-0.092295	0.928984	0.165938	0.689235	-0.169336	0.876641	0.169648	0.725098	background
Tb927.11.4900	0.144178	0.869619	-0.106746	0.801171	-0.290072	0.722461	-0.0716964	0.888873	background
Tb927.11.3080	0.0283347	0.97399	-0.422998	0.337299	-0.0989021	0.91291	-0.399854	0.432249	background
Tb927.2.380	0.326441	0.65742	-0.500454	0.321027	0.2032	0.824658	-0.213675	0.719989	background
Tb927.11.2360	-0.0709522	0.938205	-0.103803	0.80761	-0.111832	0.898829	-0.115828	0.815466	background
Tb927.3.3780	-0.379654	0.630438	-0.214305	0.587948	-0.0747397	0.945723	-0.162683	0.737297	background
Tb927.10.9910	0.0206544	0.982395	0.1982	0.620044	-0.0270876	0.985315	0.197701	0.676988	background
Tb11.v5.0745.1	0.47414	0.583287	-0.0523759	0.926671	0.547357	0.544194	-0.261111	0.609765	background
Tb927.1.4050	-0.268804	0.716656	-0.0999514	0.830591	-0.254409	0.760754	0.514192	0.336549	background
Tb11.v5.0553.1	1.11663	0.127865	0.539019	0.212447	1.54484	0.149888	0.583116	0.272901	translation
Tb927.6.3670	-0.0921892	0.916472	-0.0966099	0.836109	-0.127317	0.882832	-0.349242	0.450805	background
Tb927.2.2670	0.278747	0.715449	-0.341279	0.48934	0.136534	0.878599	0.0487482	0.937473	background
Tb927.10.13630	-0.117104	0.897558	0.113366	0.801171	-0.177187	0.854622	0.135211	0.795281	background
Tb927.10.840	-0.441352	0.59835	-0.0342771	0.943264	-0.323175	0.732617	0.0292842	0.961995	background
Tb927.8.7410	-0.359298	0.703371	-0.157338	0.735772	-0.209328	0.858573	-0.0945074	0.871315	background
Tb927.6.2110	-0.178569	0.829643	-0.534054	0.262562	-0.552316	0.485916	-0.758996	0.167728	background
Tb11.v5.0619.1	-0.257292	0.803603	-0.474765	0.299397	0.720131	0.503029	-0.411752	0.419468	background
Tb927.4.800	0.392566	0.6293	-0.152734	0.707545	0.919216	0.327568	-0.224945	0.627372	background
Tb927.1.1050	0.0169088	0.987686	-0.560035	0.369881	0.636164	0.476056	-0.572593	0.3079	background
Tb927.7.1780	0.0353632	0.97032	0.535796	0.279593	0.352604	0.67659	0.570358	0.294665	background
Tb927.11.14220	0.441931	0.541588	0.563134	0.275118	0.0368712	0.970286	0.0407047	0.943749	background
Tb927.8.4190	0.827299	0.254772	0.255165	0.515547	-0.343265	0.67879	0.100636	0.838452	background
Tb927.10.8720	-0.0252101	0.976094	0.0655775	0.886295	-0.0287209	0.978072	0.0789983	0.884183	background
Tb927.3.4500	-0.363286	0.689633	-0.361127	0.452868	0.2894	0.724163	-0.161691	0.726495	background
Tb927.5.1360	-0.333648	0.701102	-0.0575053	0.918156	-0.242413	0.77545	0.152452	0.743778	background
Tb927.11.11460	-0.0392597	0.965689	0.0436055	0.937257	-0.0427808	0.964879	0.0625184	0.919921	background
Tb927.6.4670	0.0469126	0.959895	-0.00623167	0.991342	0.0706903	0.942437	-0.00961426	0.98841	background
Tb927.8.4220	-0.0271238	0.975148	-0.060152	0.89566	-0.0344373	0.972795	-0.063449	0.904145	background
Tb10.v4.0052	0.145878	0.859163	0.00943978	0.99104	0.145041	0.867616	-0.890542	0.18757	background
Tb927.8.6390	-0.0768947	0.934733	0.0985529	0.823951	0.0772143	0.935421	0.0632993	0.902138	background
Tb927.3.5020	0.108669	0.90028	0.0869298	0.84018	0.21032	0.809167	0.112859	0.818732	background
Tb927.3.2100	-0.476229	0.503303	0.0920966	0.852918	-0.552911	0.484496	0.659037	0.204349	background
Tb927.10.7350	0.276998	0.730116	0.226436	0.570562	0.763517	0.349662	0.343035	0.460853	background
Tb927.11.14340	0.727642	0.286446	0.0649839	0.895063	0.742629	0.361608	0.638616	0.291107	background
Tb927.2.1800	0.105513	0.905752	0.096273	0.830091	0.206369	0.811433	0.17485	0.709075	background
Tb927.7.3000	0.0658903	0.943437	0.234145	0.555167	-0.111872	0.897988	0.151686	0.744023	background
Tb927.8.2060	1.03272	0.173687	0.381562	0.367183	1.69847	0.105041	0.705242	0.197796	background
Tb927.8.1770	0.566155	0.477196	0.302183	0.446063	-0.790923	0.375378	0.217954	0.637842	background
Tb927.11.2750	-0.993364	0.218543	-0.250858	0.601723	-0.616782	0.445473	0.387566	0.419516	background
Tb927.7.4520	0.363774	0.614614	0.126239	0.7688	0.437612	0.593863	0.24178	0.616124	background
Tb927.10.2970	0.29704	0.709458	0.342888	0.433559	-0.122953	0.894805	0.157347	0.743966	background
Tb927.3.3200	0.23276	0.789754	0.165501	0.699047	0.290026	0.773618	0.180609	0.72067	background
Tb927.5.2930	-0.213164	0.784199	0.0489782	0.919208	-0.172207	0.843768	-0.161081	0.732398	background
Tb927.10.8020	-0.370199	0.606581	-0.0216477	0.965883	-0.38513	0.636456	-0.293214	0.551418	background
Tb927.4.1080	0.0830222	0.929397	0.0980973	0.82701	0.093584	0.920591	0.102611	0.845016	background
Tb927.10.4130	0.188063	0.820972	0.101806	0.844467	0.229611	0.800229	0.220006	0.693899	background
Tb927.9.5490	0.109004	0.907796	-0.168332	0.769947	0.180786	0.849108	-0.249792	0.676965	background
Tb927.9.1440	0.146601	0.860449	-0.404386	0.404108	0.212311	0.808714	-0.566685	0.357494	background
Tb927.11.9640	0.115357	0.899854	-0.0468016	0.928581	0.052749	0.956175	0.0393399	0.941311	background
Tb927.11.3500	0.165164	0.840532	0.0788699	0.852918	0.0054535	0.99513	0.0609937	0.903625	background
Tb927.3.4760	-0.214331	0.800118	-0.170339	0.669402	-0.346761	0.716599	-0.175017	0.706588	background
Tb927.11.8090	-0.00423838	0.996314	-0.302749	0.475705	-0.230389	0.790144	-0.30803	0.50243	background
Tb05.5K5.130	-0.0188724	0.982156	0.19054	0.649807	-0.015701	0.989338	0.172661	0.729916	background
Tb927.5.3030	0.12994	0.875701	0.00215099	0.996262	0.128565	0.882317	-0.190812	0.676596	background
Tb927.1.720	-0.532279	0.442317	-0.183208	0.680301	-0.486576	0.544194	0.2691	0.61502	background
Tb927.6.4970	0.45902	0.503303	0.300783	0.489798	0.502503	0.52835	0.739305	0.243349	background
Tb927.11.10770	0.0477033	0.960026	-0.238423	0.559447	0.0744408	0.944555	-0.240101	0.626038	background
Tb927.8.3020	1.54548	0.0463489	1.24867	0.0519245	0.859625	0.322969	0.100184	0.876833	abundance
Tb11.v5.0356.1	0.386393	0.673673	-0.0404849	0.933987	0.489057	0.618839	-0.100383	0.845233	background
Tb927.10.5450	0.121805	0.894183	0.0108929	0.983378	0.170982	0.857942	0.0175291	0.977917	background
Tb927.1.2570	-0.510867	0.47362	-0.735305	0.124307	-3.19731	0.247211	-0.747547	0.165734	background
Tb927.11.16820	-0.888619	0.226162	-0.983429	0.143181	-1.60138	0.0946799	-2.16665	0.0152618	background
Tb927.3.3270	-1.09212	0.135264	-0.384492	0.368218	-0.896644	0.349351	-0.144303	0.797924	background
Tb927.11.13180	-0.4282	0.541588	-0.198096	0.626235	-0.658942	0.412779	-0.556067	0.266538	background
Tb927.10.15730	0.214132	0.795382	-0.0173323	0.975037	0.231213	0.797284	-0.141156	0.780204	background
Tb927.10.15120	-0.520149	0.469038	-0.635011	0.194098	0.113784	0.907472	-0.248282	0.600875	background
Tb927.10.10180	-0.0334702	0.97032	1.08599	0.0626021	-0.0895522	0.920281	1.13091	0.0719626	background
Tb927.6.5080	0.189985	0.814893	0.286128	0.506672	0.281974	0.752585	0.353735	0.485633	background
Tb927.11.5450	0.461655	0.59882	0.0721734	0.8792	0.355845	0.732675	-0.0151498	0.982515	background
Tb927.8.1950	-0.252847	0.754048	-0.321448	0.419378	-1.29032	0.166862	-0.375375	0.428737	background
Tb927.11.1980	-0.225727	0.784863	0.160985	0.690974	-0.844804	0.314232	0.209236	0.646751	background
Tb927.5.2950	0.126041	0.883765	0.119883	0.781144	-0.0625107	0.949795	0.0639649	0.901017	background
Tb927.11.11550	0.951759	0.164686	0.510737	0.249049	0.726836	0.364722	-1.6194	0.0299973	background
Tb927.11.8210	1.12627	0.117408	0.373186	0.366193	0.683114	0.414539	-0.0964569	0.854856	background
Tb927.2.6050	0.299181	0.681721	-0.250106	0.528185	0.395167	0.620321	-0.620798	0.240269	background
Tb927.7.3020	-0.823169	0.228452	-0.209431	0.613869	-0.692846	0.397967	0.471742	0.443117	background
Tb927.11.12150	-0.0177088	0.98448	0.308925	0.506207	-0.0713926	0.940636	0.321695	0.552429	background
Tb927.4.2310	-0.0879958	0.926439	0.121175	0.774871	-0.292062	0.73539	0.142016	0.766517	background
Tb927.3.1690	-0.251207	0.776177	-0.19483	0.644443	-0.708729	0.382213	-0.297082	0.515403	background
Tb927.11.3300	0.105265	0.905752	0.26765	0.510279	0.11725	0.896977	0.270443	0.572285	background
Tb927.9.5520	-0.123344	0.8856	-0.164226	0.699764	0.0672267	0.942774	-0.057981	0.909011	background
Tb927.9.8820	-0.0982061	0.91008	-0.0539021	0.909546	-0.0951503	0.914786	-0.0435411	0.93762	background
Tb927.10.200	-0.279314	0.727426	0.0671563	0.898139	-0.31804	0.716695	0.202927	0.713478	background
Tb927.10.11630	-1.43054	0.0775838	-0.68826	0.233687	-0.802696	0.347449	0.597777	0.318534	background
Tb927.10.730	0.553459	0.580672	-0.423384	0.426002	1.07323	0.375378	-0.59372	0.342332	background
Tb927.11.8960	0.497817	0.492943	0.31188	0.427551	2.14343	0.0578072	0.361345	0.439584	background
Tb927.7.2170	-0.373332	0.633816	-0.785144	0.136646	0.849472	0.312772	-0.557545	0.268868	background
Tb11.v5.0817.1	-0.0709628	0.938662	0.0471788	0.932921	-0.0533789	0.956175	-0.0679408	0.903068	background
Tb927.1.640	-0.0133249	0.988605	-0.0859995	0.863831	-0.0448811	0.967452	-0.0884003	0.883401	background
Tb927.4.5120	-0.0401002	0.96871	0.246875	0.684341	0.0906094	0.922574	0.191543	0.726702	background
Tb927.10.13280	0.84505	0.317535	0.531998	0.220011	-2.62958	0.0350043	0.406967	0.392326	background
Tb927.5.2120	-0.420653	0.631428	-0.158633	0.711954	0.00177734	0.998248	-0.0383934	0.946257	background
Tb11.v5.0863.1	0.112242	0.899171	-0.335104	0.395262	-2.14823	0.0533066	-0.322257	0.484303	background
Tb927.11.3130	-0.0144616	0.987145	-0.286244	0.609507	0.0467798	0.964703	-0.27798	0.674	background
Tb927.5.1850	0.49731	0.616641	-0.120148	0.817236	0.787554	0.339004	-0.320297	0.485987	background
Tb927.6.3650	-1.78661	0.0358174	-0.388364	0.357834	-1.52366	0.106846	1.23122	0.0703003	translation
Tb11.v5.0626.1	0.248496	0.814136	0.0712892	0.883753	0.447234	0.600845	0.148068	0.757627	background
Tb11.v5.0868.1	-0.0816001	0.940999	0.197255	0.632527	0.251885	0.808331	0.183332	0.705501	background
Tb11.v5.0833.1	0.341488	0.735026	0.11146	0.801171	0.784897	0.384605	0.177221	0.705141	background
Tb927.11.1270	0.00777015	0.993725	-0.11863	0.780042	-0.282147	0.733611	-0.115722	0.812353	background
Tb927.11.9220	-0.16431	0.840563	-0.171339	0.683999	-0.194332	0.82664	-0.212886	0.665252	background
Tb927.6.4770	0.281799	0.715587	0.228136	0.595037	0.434675	0.600638	0.39343	0.443012	background
Tb927.7.2550	-0.513434	0.514196	-0.452235	0.290538	0.291348	0.814085	-0.338783	0.485633	background
Tb927.5.2090	0.458541	0.503303	0.520461	0.277725	0.509773	0.51979	1.48782	0.0533202	background
Tb927.11.15550	-1.31444	0.199702	-0.641583	0.212184	-3.2085	0.0226628	-1.07549	0.0758492	background
Tb927.7.2700	-0.587709	0.390154	-0.670585	0.187029	-0.838664	0.309645	-2.01034	0.0335403	background
Tb927.1.3850	0.56061	0.467088	0.563895	0.201976	2.73704	0.0312905	0.705188	0.18255	background
Tb927.10.16120	0.149547	0.868768	0.00519824	0.991785	0.157569	0.868996	0.023367	0.970224	background
Tb927.10.4900	0.309989	0.672145	0.0362749	0.938396	0.117157	0.89436	-0.0207404	0.973811	background
Tb927.8.6830	0.251343	0.736832	0.243512	0.598101	0.279923	0.735579	0.877162	0.166915	background
Tb927.4.2240	-1.02675	0.140773	-0.555327	0.224703	-0.919627	0.294813	-0.28069	0.643387	background
Tb927.8.4400	-0.371712	0.631428	0.112362	0.801171	-0.233548	0.809135	0.0188623	0.977917	background
Tb927.5.790	-0.215306	0.841413	-0.27122	0.532963	-0.437919	0.713262	-0.293948	0.576719	background
Tb927.1.3250	0.509591	0.492766	0.498826	0.238142	-0.930401	0.323796	0.445517	0.361734	background
Tb927.10.12490	0.190597	0.811297	-0.0895321	0.850917	0.142334	0.871551	0.107788	0.836672	background
Tb927.4.2640	-0.104447	0.907525	0.148264	0.744572	-0.188733	0.832919	0.220472	0.65789	background
Tb927.9.10440	0.261918	0.743439	0.246423	0.531535	0.197556	0.849108	0.235786	0.625038	background
Tb927.11.8970	-0.752806	0.351027	-0.122959	0.772243	-1.29624	0.167316	-0.262906	0.568492	background
Tb927.7.2360	-0.532055	0.494472	-0.631233	0.190439	0.719417	0.380247	-0.370424	0.431927	background
Tb927.7.1220	-0.586566	0.387959	-0.13287	0.773883	-0.591172	0.45812	-0.378399	0.495176	background
Tb927.8.650	-0.340158	0.689633	-1.07341	0.104804	-0.618162	0.611813	-1.13979	0.142052	buffering
Tb927.2.4830	0.380873	0.725298	-0.102241	0.854	0.331827	0.809135	-0.0644611	0.927494	background
Tb11.v5.0569.1	-0.598871	0.462797	0.166518	0.727845	-0.728252	0.454684	0.327562	0.552251	background
Tb927.8.540	-0.838744	0.366533	-0.616146	0.190488	1.58017	0.0953862	-0.402523	0.396206	background
Tb11.v5.0751.1	0.241319	0.782519	-0.0706172	0.877342	0.0933481	0.922574	0.00896461	0.98931	background
Tb927.11.7675	-0.0591422	0.960254	-0.0907863	0.886295	0.0704809	0.942774	-0.0526962	0.922359	background
Tb927.1.1740	-0.702318	0.536315	1.18659	0.0775249	2.5736	0.0741615	1.0037	0.107101	buffering
Tb927.8.4540	0.487756	0.526347	0.729495	0.136556	-0.052167	0.9691	0.694079	0.206405	background
Tb927.8.4640	0.372215	0.614614	-0.00395545	0.995585	0.371406	0.662881	0.288759	0.674177	background
Tb927.6.2550	0.360736	0.615856	-0.127489	0.782229	0.45602	0.566415	-0.61011	0.22844	background
Tb927.10.5770	-0.502664	0.472883	-0.0566279	0.898756	-0.34162	0.678479	0.0572828	0.912258	background
Tb927.9.13860	-0.583074	0.396231	-0.421363	0.322814	-0.485826	0.576324	-0.244835	0.68338	background
Tb927.7.4180	0.429066	0.542476	0.245319	0.570239	0.614175	0.445473	0.739269	0.179015	background
Tb927.11.3490	0.212818	0.798753	-0.0998854	0.831683	0.0714714	0.939427	0.0503133	0.922343	background
Tb927.11.3740	-0.121171	0.898026	-0.259072	0.512142	1.27144	0.155306	-0.236652	0.60522	background
Tb927.9.5210	0.184987	0.830418	0.00655851	0.991117	0.170106	0.849108	-0.0533766	0.918942	background
Tb927.6.2860	-0.0845662	0.92834	-0.160457	0.809575	-0.147991	0.86575	-0.338037	0.513657	background
Tb927.9.7690	0.525712	0.486511	-0.375414	0.366446	1.30467	0.1898	-0.530749	0.294203	background
Tb927.11.4420	-0.099881	0.908519	-0.27318	0.500011	-0.127299	0.884738	-0.311871	0.510297	background
Tb927.3.1800	0.245914	0.744341	-0.177849	0.659188	0.312081	0.701766	-0.838676	0.12776	background
Tb927.4.4040	-0.682712	0.316787	-0.543846	0.218128	-0.0736771	0.939427	-0.0442873	0.935771	background
Tb927.6.860	-0.21879	0.816036	0.199307	0.619722	-0.218129	0.843768	0.199263	0.676064	background
Tb927.9.11850	0.156485	0.847772	0.249982	0.578487	0.0836203	0.927935	-0.0166015	0.980924	background
Tb927.3.1670	0.187031	0.830418	-0.105442	0.818977	0.251569	0.795821	-0.141828	0.78672	background
Tb927.9.12170	0.715859	0.336096	0.31896	0.426002	1.98846	0.0671419	0.491985	0.318366	background
Tb927.3.5620	0.145489	0.867268	-0.00837569	0.988809	0.150982	0.86977	-0.0395131	0.946049	background
Tb927.7.1470	-0.583873	0.426358	0.0198085	0.974594	-0.586239	0.492488	0.116433	0.869632	background
Tb927.6.1470	-0.250245	0.743117	-0.0629221	0.885169	-0.304445	0.715442	-0.0841207	0.866773	background
Tb927.7.5560	0.294844	0.701102	-0.0619439	0.890686	0.42392	0.59943	-0.179988	0.69833	background
Tb927.6.870	0.37518	0.609497	0.536145	0.249205	-0.185316	0.831161	0.178298	0.698365	background
Tb927.7.1310	0.0365704	0.969802	0.037012	0.945364	0.0017126	0.998248	0.000901431	0.999173	background
Tb927.1.3300	-0.328861	0.671218	-0.0833561	0.851598	-0.369431	0.67659	-0.117423	0.819072	background
Tb11.v5.0723.1	1.04062	0.211707	0.132997	0.752696	1.05664	0.332199	0.138519	0.800735	background
Tb927.8.800	0.639048	0.462797	-0.357503	0.421947	1.27708	0.258788	-0.530843	0.339763	background
Tb927.10.7610	0.161915	0.841731	0.0664001	0.909414	0.149626	0.86281	-0.457771	0.399625	background
Tb927.10.9750	-0.0679564	0.959734	-0.0944924	0.831933	-0.453055	0.694859	-0.101055	0.841531	background
Tb927.10.10170	-0.180347	0.844299	0.786693	0.166554	-0.358749	0.714331	0.817042	0.227025	background
Tb927.11.4820	0.0619841	0.95759	0.0310342	0.954281	0.000359931	0.999585	0.000632765	0.999173	background
Tb927.1.2820	-0.52548	0.604306	-0.168521	0.672304	2.18056	0.0741615	-0.146098	0.755387	background
Tb927.8.2630	0.745193	0.277034	0.643893	0.196013	0.454288	0.578812	-0.62764	0.264926	background
Tb927.11.4460	0.426854	0.536315	0.753442	0.154686	0.640629	0.421246	2.19185	0.0152618	background
Tb927.4.1840	0.545271	0.445942	0.0292752	0.952805	0.58879	0.471143	0.210618	0.651129	background
Tb927.7.3980	0.447402	0.535028	0.109426	0.801171	0.537289	0.518639	0.213012	0.65789	background
Tb927.7.840	-0.60889	0.383762	-0.26644	0.51247	-0.769125	0.403309	-0.425014	0.396196	background
Tb927.8.3460	0.651671	0.426358	-0.317084	0.463363	0.197263	0.861293	-0.147658	0.790419	background
Tb927.8.7020	-0.199137	0.802	-0.0936954	0.838317	-0.11034	0.898829	0.105869	0.829668	background
Tb927.9.4200	-0.14391	0.86415	0.00324663	0.995298	-0.146143	0.868996	0.0285383	0.962942	background
Tb927.11.4480	0.0742863	0.935369	0.190374	0.659111	0.0605199	0.952198	0.182084	0.722373	background
Tb927.8.6070	0.69799	0.35248	0.148211	0.741769	0.927974	0.286329	0.484869	0.344011	background
Tb927.8.4320	0.53111	0.528299	0.326793	0.433478	-0.526852	0.514221	0.170274	0.713699	background
Tb927.6.2420	-0.163791	0.84618	-0.118647	0.777281	-0.131892	0.893834	-0.115994	0.81377	background
Tb927.7.3090	0.297181	0.68852	0.3957	0.339211	0.774848	0.338619	0.637612	0.213599	background
Tb927.10.15290	0.0938508	0.920027	-0.260429	0.544974	0.2258	0.814012	-0.288451	0.575186	background
Tb927.9.13610	-0.126551	0.87862	-0.00740473	0.990321	-0.128782	0.882832	-0.138958	0.788417	background
Tb927.3.3770	-0.0355683	0.971159	-0.153657	0.71183	0.224895	0.806202	-0.142805	0.767082	background
Tb927.9.9740	-0.28041	0.708302	0.233918	0.563416	-0.170033	0.851237	0.0726143	0.892179	background
Tb927.10.11220	-0.577241	0.441567	-0.435498	0.295949	-0.403671	0.699797	-0.410836	0.403903	background
Tb927.6.1430	-0.0509163	0.95759	0.0500512	0.932763	-0.0599982	0.951441	0.119427	0.846447	background
Tb927.11.9240	-0.166434	0.8359	0.344018	0.405523	-0.0956293	0.913867	0.00647689	0.992867	background
Tb927.11.13380	0.240691	0.756198	0.259934	0.527226	0.00502598	0.99513	0.00667173	0.992044	background
Tb927.2.5060	0.465718	0.539962	-0.147133	0.721469	0.281044	0.766182	-0.0807863	0.879448	background
Tb927.9.5680	0.531094	0.550195	0.159341	0.705158	0.0816285	0.944555	0.0744066	0.888907	background
Tb927.11.15750	0.388724	0.594361	-0.374806	0.599741	0.523193	0.506516	-1.42603	0.04436	background
Tb927.8.2220	-0.0943822	0.916059	0.0681634	0.887877	-0.149766	0.862682	0.179367	0.698365	background
Tb927.10.3010	0.155502	0.855042	0.322959	0.455421	-0.0295091	0.978745	0.253469	0.613662	background
Tb927.11.4230	0.725959	0.413309	-0.0851127	0.872264	0.80417	0.446943	-0.263916	0.682229	background
Tb927.7.2300	-0.861753	0.233492	-0.417584	0.336245	-1.52561	0.128087	-0.832183	0.151426	background
Tb11.v5.0759.1	-0.0223735	0.982147	0.13384	0.790001	-0.13847	0.895463	0.140669	0.803249	background
Tb927.11.13740	-0.446002	0.59835	-0.245553	0.531158	-1.21605	0.239965	-0.296275	0.525471	background
Tb927.5.800	0.0537493	0.956663	-0.139235	0.762263	0.147102	0.866826	-0.197311	0.676965	background
Tb927.11.12410	0.24207	0.772614	0.15989	0.782229	0.308888	0.737265	0.30711	0.618817	background
Tb927.2.2440	0.284351	0.701102	0.358772	0.420578	0.178909	0.837771	-0.224914	0.649089	background
Tb927.3.2490	0.360778	0.611472	0.511533	0.275649	0.486212	0.55158	1.02017	0.12171	background
Tb927.2.2160	0.0315494	0.971851	-0.0462801	0.921545	-0.0180349	0.987403	-0.0273023	0.963832	background
Tb927.10.10930	0.3666	0.653678	0.512968	0.304141	0.750814	0.475898	0.669324	0.273022	background
Tb927.9.13440	-0.283331	0.70471	0.190647	0.707545	-0.349544	0.667986	0.835706	0.155786	background
Tb927.9.13920	-0.369347	0.605522	-0.299007	0.477251	-0.641409	0.423538	-0.661007	0.204958	background
Tb927.11.1370	-0.213956	0.799442	-0.446556	0.294143	-0.547663	0.575706	-0.48034	0.350833	background
Tb927.11.11570	0.286766	0.707916	-0.0430433	0.931602	0.238703	0.780969	0.213651	0.63923	background
Tb927.9.5890	-0.099329	0.912814	-0.19937	0.647613	-0.189809	0.835965	-0.241211	0.634642	background
Tb927.3.3450	-0.713393	0.293636	-0.319442	0.416699	0.0441735	0.964016	-0.174087	0.705756	background
Tb927.4.360	-0.310828	0.672823	-0.867139	0.154686	-0.0109061	0.992497	-0.000545321	0.999173	background
Tb927.10.8830	-0.0288109	0.97751	0.153046	0.707545	0.00843388	0.995104	0.15276	0.750739	background
Tb927.10.3260	-0.686268	0.442317	-0.14972	0.73121	-0.35335	0.73539	-0.00858138	0.990096	background
Tb927.11.12640	0.134451	0.872467	0.295021	0.459885	0.391102	0.623865	0.424723	0.377985	background
Tb927.11.13810	0.0860765	0.929532	-0.521376	0.220486	1.96659	0.435935	-0.524626	0.290435	background
Tb927.1.2670	-0.813566	0.261386	-1.00258	0.0812207	-0.425401	0.737265	-0.863047	0.177034	background
Tb927.3.1910	0.444193	0.526424	0.440343	0.318838	0.481444	0.557507	0.517929	0.346	background
Tb11.v5.0498.1	0.304381	0.68508	-0.0462775	0.920567	0.126075	0.885073	0.0307791	0.959606	background
Tb927.9.2900	0.986636	0.176182	0.434211	0.337299	0.419618	0.599747	-0.308585	0.50165	background
Tb927.4.770	-0.246083	0.771739	-0.0199689	0.96666	-0.167966	0.854056	0.0246314	0.967397	background
Tb927.11.1070	0.633455	0.369825	0.0942793	0.863831	0.635521	0.454003	0.124895	0.896861	background
Tb927.7.210	-0.349047	0.684711	-0.0344525	0.945364	-0.368255	0.715641	-0.0594332	0.915583	background
Tb927.8.5090	0.137499	0.869279	0.146143	0.713869	-0.114681	0.895608	0.100597	0.838452	background
Tb927.9.11230	-0.459114	0.526702	-0.160865	0.689235	-0.0782171	0.939427	-0.102942	0.835878	background
Tb927.6.3950	-1.06971	0.141973	-0.426058	0.304043	-1.4772	0.255805	-0.556346	0.285084	background
Tb927.7.4390	-1.23095	0.085622	-0.440301	0.304043	-1.47346	0.118377	-1.49922	0.0440298	translation
Tb927.2.4140	-0.202409	0.802	-0.188442	0.682625	-0.295614	0.733611	-0.322206	0.531643	background
Tb927.11.9780	0.561912	0.438159	0.0720587	0.869029	0.681114	0.417616	0.186785	0.693979	background
Tb927.6.2100	-0.0440588	0.963404	-0.795095	0.124129	-1.29215	0.210896	-0.815854	0.147094	buffering
Tb927.5.3670	0.595858	0.472066	0.186146	0.633323	-0.846101	0.324598	0.120532	0.803806	background
Tb927.8.6450	-0.676248	0.437727	-0.169394	0.675955	0.327773	0.703798	-0.0710933	0.890833	background
Tb927.7.7530	0.949184	0.282938	0.0700177	0.902964	0.913442	0.412779	-0.079327	0.918673	background
Tb927.10.6370	-0.0358972	0.975896	-0.315999	0.421947	-4.42207	0.0475382	-0.317111	0.487257	background
Tb927.6.4460	-0.393351	0.605208	-1.04577	0.112265	-1.02729	0.291176	-1.41469	0.0650751	buffering
Tb927.9.15210	-0.311356	0.771739	-0.74364	0.136556	3.34019	0.0211552	-0.681954	0.192091	background
Tb927.7.7090	0.658757	0.34056	0.325832	0.536549	0.771779	0.349524	1.33467	0.0933149	background
Tb11.v5.0717.1	-0.077003	0.932615	-0.16136	0.695793	0.0982695	0.911571	-0.0996126	0.839983	background
Tb927.10.4640	0.0103883	0.990456	0.0403221	0.933987	-0.0095858	0.99298	0.0368578	0.951032	background
Tb927.9.13795	-0.378518	0.585815	-0.441036	0.336673	-0.467557	0.558639	-1.44848	0.0529169	background
Tb927.11.5000	-0.0226181	0.979014	0.087997	0.850917	0.0709209	0.939427	0.0676244	0.893469	background
Tb927.8.3820	-0.129553	0.909335	-0.0843332	0.867871	-0.0621937	0.963247	-0.0664185	0.912847	background
Tb927.11.800	0.0906427	0.924635	0.0860395	0.851598	0.208185	0.816105	0.129135	0.796006	background
Tb927.11.11090	-0.252066	0.738536	-0.168466	0.702871	-0.177109	0.839135	0.206621	0.665879	background
Tb927.4.4550	1.42483	0.0656094	0.362393	0.375667	0.642621	0.42116	-0.287336	0.533915	background
Tb927.1.700	-0.659848	0.388256	-0.293116	0.477887	-1.39314	0.14258	-0.498257	0.320297	background
Tb927.11.16090	0.220397	0.829878	0.218508	0.605009	0.857575	0.320254	0.286777	0.537369	background
Tb927.7.1090	1.63216	0.0441673	1.61015	0.0594143	1.07854	0.236445	-0.705499	0.431626	abundance
Tb927.6.4740	0.5806	0.410075	0.100308	0.816843	0.573871	0.485916	0.092462	0.872146	background
Tb927.7.2940	0.237888	0.781438	0.348393	0.444644	0.733003	0.366235	0.510674	0.302526	background
Tb927.10.3310	0.076988	0.933666	-0.0402312	0.953467	0.0735375	0.939427	0.00755218	0.994776	background
Tb927.11.12230	0.056123	0.957342	-0.323783	0.513918	0.302207	0.732096	-0.369439	0.478538	background
Tb927.4.4510	0.659366	0.442317	0.547323	0.215681	-0.364222	0.80253	0.490086	0.337341	background
Tb927.3.4920	0.170386	0.841731	0.055947	0.916487	0.22737	0.795631	0.208525	0.653836	background
Tb927.11.2510	0.764189	0.360552	0.16163	0.696194	1.04247	0.326265	0.221398	0.646691	background
Tb927.1.3260	0.247483	0.744341	0.248405	0.576598	0.338627	0.676854	0.872058	0.121925	background
Tb927.4.2500	0.559044	0.48651	0.660483	0.174217	2.16406	0.0503519	0.890333	0.112902	background
Tb927.9.5700	0.603207	0.43172	0.584122	0.184089	6.42165	0.00756139	0.620759	0.222283	background
Tb11.v5.0433.1	0.126499	0.898101	0.0962906	0.851598	0.260925	0.765474	0.170287	0.724287	background
Tb11.v5.0754.1	-0.495268	0.492766	-0.315623	0.452868	-0.197205	0.838795	-0.102775	0.850942	background
Tb927.7.6260	0.289967	0.696197	0.246352	0.599741	0.360076	0.661578	0.681549	0.254462	background
Tb927.10.7280	0.194716	0.815288	0.256531	0.529481	0.601232	0.455889	0.362846	0.441111	background
Tb927.2.400	0.0701807	0.944682	-0.398918	0.328927	-1.6108	0.0938086	-0.382816	0.418893	background
Tb927.3.1630	0.322957	0.715494	0.130828	0.761348	0.766121	0.367405	0.206947	0.653836	background
Tb927.9.13520	0.412342	0.553989	-0.255618	0.513411	-0.0571707	0.954218	-0.18159	0.694863	background
Tb927.10.13450	-0.0718233	0.938662	0.095803	0.828822	-0.228229	0.793019	0.139696	0.766517	background
Tb927.10.11770	0.203708	0.802	0.190368	0.683281	0.308427	0.716434	0.339504	0.515403	background
Tb927.1.860	0.182466	0.869126	0.103716	0.821309	-0.204544	0.811649	0.0548223	0.915254	background
Tb927.1.540	-0.0394721	0.969057	-0.355957	0.496031	0.0757287	0.947754	-0.341633	0.57493	background
Tb927.10.4200	-0.194165	0.835599	-0.140729	0.747243	-0.233331	0.827043	-0.148447	0.773543	background
Tb927.8.5200	0.0791559	0.939723	0.244205	0.53566	0.386858	0.737489	0.250961	0.596119	background
Tb927.2.2240	0.277385	0.722475	-0.127455	0.792524	0.241862	0.795821	-0.0524182	0.934284	background
Tb927.10.3870	-0.157552	0.874984	0.406042	0.337652	1.24351	0.159577	0.360385	0.439643	background
Tb927.9.2730	-1.02128	0.329659	-0.0923012	0.836708	-1.37572	0.287792	-0.168414	0.728029	background
Tb927.8.770	-1.52184	0.0469057	-0.77912	0.124809	-1.87981	0.0688412	-3.77388	0.0031112	translation
Tb927.11.9920	0.446964	0.515242	0.213635	0.581893	0.485976	0.538986	2.59888	0.00848161	background
Tb927.5.4190	0.467038	0.580909	0.359679	0.46325	-0.0895807	0.924184	0.0854141	0.870882	background
Tb927.9.4210	0.327746	0.671811	0.195759	0.620694	0.383108	0.683118	0.207068	0.663634	background
Tb927.11.14970	0.241455	0.765387	0.212494	0.621024	-0.0147946	0.989873	0.0346178	0.953083	background
Tb927.9.13070	-0.236764	0.784644	-0.368088	0.388629	0.45045	0.620197	-0.273285	0.560958	background
Tb927.10.10140	-0.225589	0.771739	0.168217	0.700268	-0.348394	0.669277	0.437753	0.373544	background
Tb927.9.11580	-0.364708	0.60429	0.0622946	0.891423	-0.39016	0.624667	0.639504	0.220904	background
Tb11.v5.0617.1	-0.209841	0.790102	0.238427	0.552077	-0.47088	0.553712	0.419481	0.38203	background
Tb927.3.1060	0.222373	0.814261	0.0672853	0.877356	0.0758485	0.950536	0.0508891	0.923102	background
Tb927.10.7500	0.22556	0.790101	0.262858	0.51101	-0.69822	0.386381	0.199966	0.66363	background
Tb927.10.2950	0.50684	0.479965	0.318293	0.475533	0.566174	0.509861	0.402744	0.459773	background
Tb927.9.6310	-0.052938	0.957342	0.0268312	0.957703	-0.0648389	0.947534	0.0527556	0.924218	background
Tb927.5.4480	0.046184	0.960094	0.215087	0.620034	-0.11757	0.895546	0.177688	0.715734	background
Tb927.8.1960	0.331892	0.701102	-0.00735425	0.99019	0.358065	0.658186	-0.10014	0.838452	background
Tb927.9.10570	-0.146489	0.860858	0.240192	0.538822	0.134683	0.878071	0.139505	0.767655	background
Tb927.8.8330	-0.749809	0.271375	-0.288998	0.63515	-0.752174	0.358898	-0.407662	0.745556	background
Tb927.9.3680	-0.0699135	0.940999	0.0344049	0.953753	-0.0769564	0.936647	0.0851592	0.895115	background
Tb927.3.5070	0.500881	0.503303	-0.0859077	0.857809	0.628073	0.435106	-0.408366	0.394697	background
Tb927.1.2120	-0.130522	0.875701	-0.638256	0.188024	-0.417588	0.600308	-0.912802	0.108275	background
Tb927.11.4280	0.343996	0.636965	0.0811631	0.851598	0.217154	0.80805	-0.0248128	0.9675	background
Tb11.v5.0223.1	-1.17704	0.12786	-0.851543	0.101093	0.591425	0.473374	-0.416486	0.390994	abundance
Tb927.7.7500	-0.814142	0.503303	0.0609915	0.891423	-1.44576	0.181217	0.125954	0.795581	background
Tb927.4.5380	-0.0846426	0.931155	0.113167	0.792021	-0.263131	0.788278	0.122354	0.803975	background
Tb11.v5.0504.1	0.221909	0.77918	-0.0511313	0.91424	0.17693	0.844482	0.0109079	0.986721	background
Tb927.9.9860	0.532531	0.449459	0.0843216	0.846085	0.688336	0.404033	0.215454	0.63923	background
Tb11.v5.0178.1	-0.959155	0.165917	-0.385336	0.33968	-2.06201	0.0578072	-0.676004	0.194686	background
Tb927.10.12060	-0.599526	0.375353	-0.309911	0.428758	-0.673872	0.404355	-0.431495	0.375973	background
Tb927.7.250	0.346627	0.629184	-0.00943502	0.987522	0.345559	0.675566	0.113795	0.843778	background
Tb927.11.5970	-0.656435	0.343331	-0.175551	0.755306	-0.637825	0.447323	0.0978901	0.91406	background
Tb927.5.3230	0.789011	0.306188	-0.289704	0.525738	0.356273	0.67659	0.163413	0.740855	background
Tb927.10.14420	0.186279	0.813188	0.324846	0.499884	0.216912	0.802167	1.17163	0.0888287	background
Tb927.7.2850	0.461789	0.500026	0.224291	0.638889	0.465731	0.558639	1.63905	0.0492281	background
Tb927.9.8760	0.0488061	0.961065	0.30479	0.482168	0.64157	0.435935	0.327512	0.482003	background
Tb927.9.13620	0.388899	0.655152	0.169545	0.697403	0.354852	0.744727	0.159177	0.767082	background
Tb927.11.6550	-0.664966	0.337839	0.0255442	0.956848	-0.658837	0.430683	0.00134799	0.999173	background
Tb927.8.1480	0.0137276	0.987145	0.105186	0.806278	0.111208	0.898509	0.117292	0.809993	background
Tb927.5.1950	-0.0722212	0.951817	-0.738837	0.190439	-0.308394	0.851237	-0.747567	0.259467	background
Tb927.8.8130	1.03987	0.398891	0.0235788	0.962654	0.86614	0.294813	-0.117373	0.809424	background
Tb927.8.5170	-0.100839	0.917659	0.0878151	0.841824	-0.232864	0.810444	0.0995997	0.843683	background
Tb927.11.13520	-0.174065	0.85252	-0.121641	0.77437	0.221901	0.816105	-0.0934997	0.851186	background
Tb927.11.15950	-0.902398	0.200077	-0.130054	0.800485	-0.991855	0.239965	-1.30809	0.0530101	background
Tb927.4.420	-0.257351	0.731916	-0.262822	0.51101	-0.250413	0.764597	-0.168631	0.722606	background
Tb11.v5.0431.1	-0.423072	0.558364	-0.0982859	0.829448	-0.363258	0.674539	0.00926784	0.98931	background
Tb11.v5.1058.1	-1.00186	0.381603	-0.198715	0.698524	-0.416452	0.600876	0.140971	0.76507	background
Tb927.3.4970	0.100906	0.908456	-0.0707849	0.917079	0.093418	0.917518	0.107112	0.884183	background
Tb927.11.9610	0.267795	0.731916	0.0405566	0.931602	0.181315	0.834699	-0.0850026	0.863431	background
Tb927.11.2470	-0.367231	0.613189	0.490762	0.323914	-0.294252	0.737489	0.331039	0.593766	background
Tb927.11.10900	0.641463	0.341852	0.347142	0.388421	0.522372	0.516718	0.167561	0.730919	background
Tb927.10.10880	0.367756	0.611202	0.245429	0.525738	1.31862	0.311678	0.285749	0.533915	background
Tb927.11.15850	-0.0610129	0.949356	0.0279434	0.956342	-0.0532277	0.957757	0.00361535	0.996676	background
Tb927.10.7700	-0.257948	0.74002	0.206179	0.592181	-0.85023	0.323147	0.22845	0.618723	background
Tb927.10.14550	-0.0219152	0.979014	0.117082	0.792408	-0.0198874	0.985315	0.115639	0.824083	background
Tb927.10.9440	-0.417905	0.549402	-0.338299	0.432964	-0.444659	0.590352	-0.424356	0.426291	background
Tb927.8.7530	-0.0894544	0.926439	-0.0913268	0.852586	0.0213453	0.984803	-0.0176065	0.977917	background
Tb927.11.4880	0.249937	0.746209	0.0615095	0.898756	0.237747	0.789696	-0.0064697	0.993541	background
Tb927.11.1990	-0.0793434	0.932615	-0.00546241	0.991729	-0.0383288	0.968123	0.00448727	0.995441	background
Tb927.8.7390	0.113813	0.900416	-0.0336861	0.943264	0.438505	0.582814	-0.0454752	0.930728	background
Tb927.10.5810	-0.0964695	0.911933	0.208107	0.602972	-0.0180115	0.987403	0.135042	0.785554	background
Tb927.9.8180	0.324587	0.670715	0.242049	0.531827	0.133367	0.895885	0.221712	0.633707	background
Tb927.10.11440	-0.0706328	0.941506	-0.183117	0.711676	-0.204753	0.812678	-0.267854	0.572587	background
Tb11.v5.0695.1	0.785691	0.294009	0.354097	0.375667	2.12521	0.0620531	0.472162	0.336983	background
Tb927.10.7060	0.102028	0.909419	0.118481	0.78278	0.340855	0.675566	0.168915	0.714406	background
Tb927.3.5180	-0.582027	0.451094	0.00437549	0.995356	-0.583309	0.521937	0.210256	0.8027	background
Tb927.1.1670	-0.0672335	0.943513	-0.310261	0.453906	-0.139849	0.882832	-0.321245	0.509746	background
Tb927.6.890	0.322432	0.6582	0.206233	0.60531	0.0968757	0.91291	-0.0841408	0.865781	background
Tb927.11.16110	-0.126729	0.90028	-0.378868	0.351317	1.50496	0.133927	-0.355492	0.446358	background
Tb927.9.4080	0.406964	0.634604	0.541803	0.262794	-0.48285	0.602302	0.360834	0.466733	background
Tb11.v5.0547.1	0.142873	0.874984	0.188097	0.683281	0.328696	0.703798	0.270856	0.584007	background
Tb927.10.2900	-0.361279	0.614614	-0.414935	0.33993	-0.344082	0.681763	-0.387603	0.450805	background
Tb927.10.13517	-0.0120254	0.988877	0.120271	0.816395	-0.0927685	0.91861	0.134146	0.794118	background
Tb927.4.1850	0.0155278	0.987686	0.0601236	0.898756	0.0564743	0.963247	0.0613327	0.911191	background
Tb927.1.420	-0.313969	0.672823	-0.698597	0.14583	-0.286861	0.795821	-0.689275	0.216036	background
Tb927.8.8200	-0.429036	0.5362	-0.42027	0.427591	-0.520953	0.510745	-1.7788	0.0478987	background
Tb11.v5.0831.1	-0.291708	0.711165	-0.448365	0.371966	-0.643645	0.426959	-0.791658	0.157972	background
Tb927.3.4940	-0.126047	0.879236	0.0689366	0.877205	-0.143228	0.871113	0.111581	0.827062	background
Tb927.9.2350	0.967281	0.173687	0.521438	0.309751	1.23506	0.176691	1.56056	0.11429	background
Tb927.7.1790	-0.24763	0.867892	-0.344876	0.434774	-1.41434	0.430094	-0.378971	0.450116	background
Tb927.6.4600	0.427674	0.572064	-0.246596	0.536295	1.0616	0.216778	-0.407219	0.392517	background
Tb927.10.12240	-0.730116	0.283619	-0.277339	0.485856	-0.416726	0.602219	0.205748	0.66363	background
Tb927.4.3500	-0.587383	0.416248	-0.25065	0.539357	-0.22065	0.797986	0.147863	0.751993	background
Tb927.11.2590	-0.629127	0.427496	-0.0905132	0.841824	-0.576682	0.55158	-0.0460218	0.939651	background
Tb927.6.650	0.394935	0.582004	0.175879	0.671031	0.128721	0.882832	-0.0586179	0.908785	background
Tb927.7.3520	-0.692495	0.333554	-0.59067	0.186437	0.914088	0.29994	-0.428633	0.381549	background
Tb927.11.5850	-0.904163	0.295145	-0.406859	0.342397	-2.22097	0.106846	-0.619056	0.244241	background
Tb11.0880	-0.0803515	0.93878	-0.479479	0.250678	-1.9369	0.128087	-0.485508	0.325173	background
Tb927.10.11030	0.418379	0.7475	-0.118216	0.79923	0.962018	0.352983	-0.187401	0.693736	background
Tb927.11.6830	0.876987	0.341852	-0.0545243	0.917381	0.968425	0.382208	-0.209847	0.705141	background
Tb927.3.1720	0.88451	0.201337	0.775743	0.212913	1.18507	0.175533	3.03265	0.00582056	background
Tb927.6.600	0.909494	0.227833	0.351346	0.380686	2.55968	0.037863	0.540124	0.275855	background
Tb927.5.1050	0.0391137	0.971851	-0.17044	0.676085	0.956721	0.258788	-0.177524	0.699959	background
Tb11.v5.0508.1	0.406638	0.554328	-0.541122	0.242715	0.332889	0.684323	0.0888237	0.873402	background
Tb927.11.3060	0.252572	0.735828	-0.254227	0.573865	0.186517	0.830474	0.413638	0.419935	background
Tb927.3.1120	0.103453	0.905594	0.184981	0.635692	0.178346	0.836912	0.278459	0.545012	background
Tb927.11.3360	0.0954951	0.926439	0.0182173	0.975477	0.0904888	0.935957	0.00632816	0.994776	background
Tb11.v5.0678.1	-0.175122	0.835028	0.0214948	0.964772	-0.189037	0.836043	0.0644946	0.903625	background
Tb927.10.15310	0.882312	0.24238	0.220744	0.600972	0.587344	0.502205	-0.0695424	0.903332	background
Tb927.5.510	-0.515332	0.529401	0.058545	0.901188	-0.335273	0.681763	-0.103666	0.832948	background
Tb927.10.10390	-0.114372	0.893876	-0.0891434	0.852586	-0.0540275	0.956015	0.0796116	0.874983	background
Tb927.11.4130	0.411194	0.553676	0.259774	0.523094	0.609567	0.445473	0.750929	0.16605	background
Tb927.10.7690	0.0133649	0.987686	0.316814	0.435753	-0.328362	0.735096	0.312606	0.505027	background
Tb927.7.4450	0.18892	0.84218	0.321023	0.430709	0.447556	0.739184	0.331901	0.487089	background
Tb927.11.11500	0.182541	0.82482	0.326995	0.417181	0.761362	0.355656	0.408155	0.393031	background
Tb927.3.2900	-0.187233	0.842819	-0.201192	0.616163	-0.21912	0.839135	-0.203337	0.670812	background
Tb927.8.4810	-0.257063	0.759656	-0.0918418	0.837088	-0.010516	0.992497	-0.00937569	0.988899	background
Tb927.8.6200	0.0908361	0.926439	0.253792	0.544116	0.335202	0.730535	0.281136	0.569511	background
Tb927.4.1220	0.128225	0.877879	-0.0484372	0.921825	0.0945726	0.914786	0.136099	0.774034	background
Tb927.5.2430	-0.49656	0.53006	-0.341776	0.515547	-0.839676	0.320231	-0.773068	0.177568	background
Tb927.11.11430	0.293571	0.722603	-0.00226773	0.996262	0.290508	0.757066	0.0457965	0.934284	background
Tb927.10.2290	-0.272284	0.714244	-0.348536	0.444985	-0.213851	0.804212	1.24855	0.0543568	background
Tb927.11.11250	-0.418161	0.577919	-0.0627715	0.900439	-0.330422	0.68374	0.236129	0.606039	background
Tb927.8.4050	0.0762308	0.938662	0.230238	0.551168	1.05971	0.228137	0.243502	0.596119	background
Tb927.10.4280	-0.996396	0.231892	-0.550854	0.231369	-0.940814	0.517341	-0.539597	0.366746	background
Tb927.3.3560	0.234355	0.766996	0.259915	0.570562	0.220922	0.812369	0.238639	0.671912	background
Tb927.7.3620	-0.0348565	0.971851	-0.128274	0.757897	0.528186	0.521937	-0.12233	0.800907	background
Tb927.11.3510	0.309266	0.704449	0.0255738	0.962901	0.344034	0.671793	0.252239	0.58096	background
Tb927.11.1160	0.2088	0.788712	-0.156904	0.708579	0.320541	0.693282	-0.449923	0.352684	background
Tb927.10.14610	-0.244363	0.765387	-0.0965194	0.839409	-0.170821	0.855865	0.000831332	0.999173	background
Tb927.9.8410	-0.491902	0.490357	-0.189101	0.626014	-0.24129	0.795647	-0.173556	0.709488	background
Tb927.11.13920	-0.147783	0.864725	-0.00718864	0.991117	-0.141918	0.87372	0.11735	0.819223	background
Tb927.10.12120	0.404628	0.570096	0.184528	0.640053	0.208379	0.815125	0.105822	0.832198	background
Tb927.9.11800	-0.0662828	0.947464	-0.231975	0.581893	-0.225365	0.810444	-0.253013	0.613525	background
Tb927.11.11880	0.532743	0.448545	0.170167	0.672984	0.368227	0.658599	0.0673265	0.897131	background
Tb927.1.1840	0.367017	0.620256	-0.0469168	0.925448	0.310729	0.705524	0.21492	0.643472	background
Tb927.8.6500	-0.357803	0.68698	-0.727619	0.154686	-0.439422	0.711318	-0.735391	0.213974	background
Tb927.10.4910	-0.0157045	0.985739	-0.146395	0.801171	-0.0130872	0.991085	-0.145485	0.836573	background
Tb927.11.1380	-0.327181	0.745952	0.0515478	0.913573	-0.0777701	0.953726	0.0319163	0.958452	background
Tb927.6.5150	-0.180758	0.851082	0.294594	0.51247	-0.127551	0.921491	0.286317	0.596119	background
Tb927.9.13710	-0.49398	0.468163	-0.342282	0.453476	-0.495436	0.529067	-0.434086	0.465072	background
Tb11.v5.0701.1	-0.761923	0.297109	-0.332115	0.439403	-1.24174	0.18625	-0.742027	0.196967	background
Tb927.11.6790	0.622848	0.426358	-0.127429	0.809052	0.662644	0.478664	-0.252523	0.673272	background
Tb927.11.1260	0.363204	0.604378	-0.227935	0.631841	0.353116	0.662561	0.944596	0.160449	background
Tb927.4.620	-0.812521	0.230054	-0.271997	0.500879	-0.535472	0.495265	0.519822	0.293924	background
Tb927.11.12440	-0.319383	0.673978	-0.255019	0.553154	-0.582834	0.462751	-0.55557	0.268328	background
Tb927.10.2650	0.00284129	0.996904	0.136067	0.772243	-0.120463	0.895463	0.134281	0.795281	background
Tb927.7.2140	-2.06756	0.0578919	-1.55466	0.0519245	-0.00826347	0.998237	-1.4146	0.0749612	abundance
Tb927.1.2190	0.0280283	0.975896	-0.385548	0.409538	-0.426062	0.597036	-0.36299	0.441213	background
Tb927.6.4570	0.688352	0.352396	-0.271673	0.631428	0.837413	0.341384	-0.911789	0.192091	background
Tb927.10.1550	0.198452	0.802	0.0803698	0.898139	0.192387	0.827043	-0.114641	0.875969	background
Tb927.10.2730	0.180263	0.829183	0.105194	0.814154	0.31185	0.705394	0.218669	0.637528	background
Tb927.7.3940	-0.190836	0.814338	-0.0610484	0.91424	-0.187949	0.836043	-0.0383665	0.960742	background
Tb927.10.10750	0.132976	0.88879	0.207521	0.587524	-3.74774	0.1597	0.204598	0.653836	background
Tb927.4.450	-0.213445	0.781765	-0.335299	0.427692	-0.366562	0.648529	-0.745194	0.170838	background
Tb927.3.3000	0.0838576	0.9266	0.0596177	0.902406	0.0375583	0.9691	-0.0241154	0.969011	background
Tb927.3.720	0.0987431	0.914042	0.0210136	0.96942	0.0915652	0.924639	-0.0127986	0.986595	background
Tb927.7.4030	0.553594	0.441656	0.0524828	0.920842	0.51315	0.521937	-0.430687	0.426291	background
Tb927.8.6090	0.52798	0.484703	0.386575	0.387578	0.756972	0.445473	0.515507	0.365855	background
Tb927.2.4280	0.472299	0.492766	0.590734	0.183904	1.00951	0.237318	0.782396	0.155786	background
Tb927.8.890	0.135115	0.875701	-0.19038	0.766575	0.0660919	0.945625	0.0888275	0.885708	background
Tb927.10.1970	-0.205139	0.793001	0.290625	0.505564	-0.110286	0.899988	0.0575756	0.919921	background
Tb927.2.3720	0.126633	0.883714	-0.0209557	0.96829	0.12345	0.894805	-0.00526937	0.995411	background
Tb927.7.2860	0.244692	0.784119	0.472043	0.263126	0.703831	0.676401	0.484821	0.335566	background
Tb11.v5.0613.1	-0.429798	0.564122	0.0897483	0.839615	-0.629065	0.4428	0.240891	0.604064	background
Tb927.11.7170	-0.100114	0.910965	-0.205205	0.621778	-0.298723	0.717624	-0.281795	0.54603	background
Tb927.5.1250	-0.0512635	0.95759	-0.0244107	0.959343	-0.0915444	0.919471	-0.0432419	0.935771	background
Tb927.5.2850	-0.258169	0.766687	0.0986884	0.864088	-0.247954	0.809167	0.0752138	0.920933	background
Tb927.11.5090	-1.78689	0.11572	-1.30038	0.0614274	0.204621	0.935957	-1.04882	0.167728	abundance
Tb927.10.12510	-0.165097	0.847772	-0.0218877	0.963899	-0.194733	0.830985	-0.080815	0.877591	background
Tb927.7.4020	-0.710365	0.329659	-0.000939671	0.998162	-0.71359	0.395332	-0.13827	0.773075	background
Tb927.11.9440	-0.201031	0.802	0.354669	0.388579	-0.0272746	0.982009	0.303845	0.530306	background
Tb927.11.3030	0.415576	0.592361	0.077132	0.870873	0.32881	0.715757	-0.0654649	0.907116	background
Tb927.2.2090	0.376429	0.60429	-0.148441	0.721448	0.595206	0.455889	-0.383023	0.419495	background
Tb927.7.2830	0.0340366	0.97077	0.226258	0.63026	0.173278	0.842273	0.279431	0.545012	background
Tb927.3.2950	0.0298289	0.976094	-0.399395	0.339884	1.39392	0.188214	-0.406208	0.397246	background
Tb927.9.7720	-0.448546	0.538647	-0.442317	0.283537	-1.15421	0.455889	-0.477386	0.334555	background
Tb927.4.1950	0.254769	0.807355	-0.148683	0.710367	-1.29741	0.219023	-0.133557	0.780579	background
Tb927.8.1510	-0.375939	0.588421	-0.494998	0.323492	-0.4144	0.602302	-3.02681	0.0115584	background
Tb927.10.3000	-0.0645236	0.954265	0.517771	0.228918	-2.39569	0.0503519	0.528147	0.288348	background
Tb927.2.4510	-0.214816	0.781765	-0.231391	0.599741	-0.226999	0.797786	-0.278696	0.605162	background
Tb927.11.5700	0.47909	0.497926	-0.171735	0.705158	0.538839	0.515414	-0.401843	0.467313	background
Tb927.7.3050	-0.218173	0.804792	0.208191	0.603392	-0.841537	0.313152	0.275385	0.547404	background
Tb927.9.5150	-0.16571	0.84618	-0.232984	0.584993	-0.0137436	0.990507	-0.158916	0.758293	background
Tb927.10.12540	-0.0654247	0.945933	-0.412197	0.339884	0.381512	0.649221	-0.373132	0.43791	background
Tb927.10.3630	0.633634	0.429191	-0.0270913	0.958144	0.581899	0.485916	0.218426	0.646843	background
Tb927.8.7730	-0.944672	0.211062	-1.11013	0.0923931	-0.663573	0.501928	-0.864827	0.304172	background
Tb927.11.3705	-0.0848579	0.929532	0.386677	0.361812	0.400992	0.631523	0.349692	0.465769	background
Tb927.10.12720	-0.00110052	0.998256	0.346614	0.452868	0.103302	0.91291	0.346164	0.522209	background
Tb927.11.17040	-1.35321	0.085622	-0.46514	0.335099	-0.973652	0.303412	0.196032	0.754398	background
Tb927.11.4630	0.129686	0.88043	-0.433105	0.286757	-2.13688	0.0513158	-0.40833	0.390843	background
Tb927.1.2600	-1.08487	0.178526	-1.22635	0.0594143	0.62272	0.69369	-0.919687	0.165734	background
Tb927.7.2350	-0.330006	0.67588	-0.634206	0.231369	-0.533945	0.593469	-0.743469	0.287357	background
Tb11.v5.0784.1	-0.278025	0.747445	-0.508126	0.271648	0.596953	0.491856	-0.368619	0.438909	background
Tb927.9.6090	-0.529421	0.497622	0.134906	0.77788	-0.303373	0.711256	-0.174423	0.705756	background
Tb927.6.4210	-1.08337	0.141973	-0.557979	0.204839	-2.14983	0.0801895	-0.741315	0.17535	background
Tb927.7.2320	-0.913056	0.301518	-1.01852	0.22316	-0.0620894	0.954628	-0.0406945	0.960078	background
Tb11.v5.0687.1	0.174649	0.847334	0.0333095	0.965883	0.162417	0.867616	-0.107502	0.892179	background
Tb927.5.4380	1.52686	0.077458	0.662874	0.150951	-2.67752	0.0335743	0.423074	0.377985	background
Tb927.5.3350	0.183746	0.821273	-0.00556882	0.991785	0.190555	0.82664	-0.151127	0.74504	background
Tb927.10.12660	0.404295	0.630438	0.424531	0.304141	-1.69411	0.083009	0.34283	0.459773	background
Tb927.11.5400	0.215388	0.793001	0.0764103	0.860319	-0.0236912	0.983766	0.0291362	0.961929	background
Tb927.3.2890	0.214438	0.782569	-0.4012	0.371966	0.229333	0.797786	-0.426234	0.434701	background
Tb927.7.7410	0.0281174	0.974297	-0.411243	0.317802	-0.502459	0.528425	-0.395297	0.407427	background
Tb927.11.14120	0.512795	0.462797	-0.0589146	0.901534	0.504102	0.534036	0.0288232	0.966804	background
Tb11.v5.0636.1	0.37436	0.594116	0.0461875	0.921545	0.34901	0.670809	-0.10943	0.827062	background
Tb927.2.4850	-0.0527596	0.959734	-0.132758	0.745147	0.950297	0.256632	-0.12579	0.795281	background
Tb927.9.9820	-0.0981577	0.917627	-0.0458775	0.928581	-0.159426	0.858686	-0.0992775	0.845347	background
Tb927.10.3520	0.171931	0.831844	0.199837	0.610528	0.305422	0.715442	0.248748	0.594939	background
Tb927.7.3370	-0.543823	0.434517	0.193014	0.682625	-0.574754	0.471143	1.13192	0.119374	background
Tb927.3.1210	0.110461	0.89702	0.338224	0.392234	0.550148	0.485916	0.416371	0.384236	background
Tb927.11.6420	0.270321	0.716143	0.220406	0.567495	0.548244	0.485916	0.423685	0.377985	background
Tb927.10.1490	-0.399002	0.57159	-0.283859	0.500212	-0.669006	0.407321	-0.675695	0.196664	background
Tb927.7.6220	0.0908121	0.920251	0.38597	0.337299	1.23793	0.183778	0.391247	0.409757	background
Tb927.3.5060	0.20575	0.831833	0.114258	0.819696	0.0460476	0.966254	0.0344939	0.958674	background
Tb927.8.1570	-0.0823812	0.929532	0.0320851	0.95305	-0.0539592	0.956036	-0.0591643	0.907158	background
Tb927.3.5010	-0.0054736	0.995868	0.0773741	0.868072	-0.00613191	0.995104	0.0789331	0.888424	background
Tb927.6.2460	0.149868	0.859313	-0.176743	0.673669	0.00215842	0.99793	-0.0993244	0.846187	background
Tb927.11.6720	0.0509976	0.959103	-0.169177	0.705158	0.103116	0.914786	-0.179457	0.731402	background
Tb927.11.11850	0.256667	0.738536	0.0171259	0.9712	0.287261	0.735096	0.0696226	0.891684	background
Tb927.11.3280	0.15128	0.86415	0.255423	0.550009	0.317596	0.721833	0.314194	0.537155	background
Tb927.5.1700	0.484598	0.549402	-0.0323804	0.948318	0.38028	0.635345	0.117046	0.809742	background
Tb927.10.8030	-0.019558	0.981898	0.0489693	0.917128	0.0106526	0.992497	0.0465678	0.930229	background
Tb927.8.1790	-0.0324743	0.971851	-0.0793339	0.868072	0.0528077	0.956175	-0.0491793	0.923932	background
Tb927.6.2200	-0.764559	0.270297	-0.270864	0.515547	-0.642348	0.439178	0.0201471	0.979112	background
Tb927.8.6350	0.105258	0.917758	0.357998	0.37012	2.52563	0.0368986	0.373508	0.428449	background
Tb927.1.1880	0.502878	0.588124	0.0647997	0.891423	0.312483	0.75415	-0.0407604	0.941882	background
Tb927.11.2280	0.113546	0.891222	0.0834389	0.855439	0.113788	0.896161	0.0918841	0.86462	background
Tb927.11.8470	0.536731	0.590506	0.472372	0.267475	-0.643215	0.600605	0.43862	0.381562	background
Tb927.7.4240	-0.0457595	0.960254	-0.0566277	0.930836	-0.0180862	0.987403	0.0264319	0.967316	background
Tb927.11.2320	0.605043	0.508761	0.10502	0.836109	0.788542	0.431028	0.275721	0.590807	background
Tb927.11.11490.1	3.71519	0.00536381	-0.514784	0.281314	2.9085	0.0264416	1.79979	0.0260732	background
Tb927.7.860	-0.23871	0.807994	-0.128998	0.762335	-0.862406	0.308481	-0.174914	0.705141	background
Tb11.v5.0810.1	0.25665	0.735026	-0.0973513	0.820337	0.245314	0.775713	-0.0884973	0.860324	background
Tb927.6.1480	0.714786	0.430387	0.124763	0.770736	1.24825	0.249404	0.215678	0.646154	background
Tb927.6.410	-0.609955	0.442482	-0.664113	0.345296	-0.973334	0.307509	-1.32689	0.125968	background
Tb927.11.10670	-0.31858	0.661659	0.173751	0.690155	-0.246151	0.774674	-0.132926	0.798032	background
Tb927.10.8050	-1.57895	0.131565	-0.574054	0.233595	-1.12817	0.468235	-0.471735	0.45146	background
Tb927.9.9810	-0.477016	0.500747	-0.220336	0.594281	-0.349424	0.67879	-0.0165397	0.980924	background
Tb927.7.6290	-0.262823	0.754362	0.116411	0.839198	-0.36969	0.645254	0.40264	0.396196	background
Tb927.9.7770	-1.79354	0.0372823	-1.27256	0.0594143	-2.78392	0.0502724	-2.38139	0.0316888	translation
Tb927.7.6830	-1.22425	0.117502	-0.565936	0.195994	2.51194	0.0401486	-0.395873	0.405777	background
Tb927.11.4910	-0.138146	0.869279	0.0861761	0.841824	-0.225325	0.797786	0.116209	0.813038	background
Tb927.11.5770	-0.0599414	0.959286	0.174695	0.697441	-0.505847	0.521937	0.19782	0.666813	background
Tb927.9.12090	0.373808	0.594116	0.0221389	0.963899	0.376733	0.64124	0.110408	0.837158	background
Tb927.8.6010	-0.153206	0.863469	0.0806965	0.902613	-0.19213	0.831538	0.269428	0.636849	background
Tb927.11.8950	0.136061	0.914042	0.191873	0.630103	-1.32061	0.157068	0.174727	0.705141	background
Tb927.7.7040	-0.687631	0.306188	-0.124264	0.766253	-0.826643	0.313903	-0.553272	0.269671	background
Tb927.9.13680	-0.519023	0.496017	-0.256669	0.539878	-0.0647262	0.947843	-0.00488837	0.995411	background
Tb927.6.4100	-0.943147	0.205378	-0.180479	0.726802	-0.98691	0.294813	-0.422431	0.567172	background
Tb927.4.1630	-0.15772	0.851082	0.0440543	0.929938	-0.214087	0.804212	0.164138	0.722338	background
Tb927.7.1300	-0.604606	0.422485	-0.246619	0.530827	-0.856098	0.364722	-0.306104	0.515234	background
Tb927.3.2170	-0.0630214	0.945432	0.161484	0.706688	-0.0246512	0.982101	-0.0281932	0.963832	background
Tb927.9.9370	-0.933442	0.284611	-0.296807	0.506477	-1.70614	0.0829891	-0.652302	0.205849	background
Tb927.8.1720	-0.335806	0.642248	0.0280856	0.953753	-0.301194	0.713759	-0.204713	0.657046	background
Tb927.1.3390	-0.120995	0.950285	-0.751425	0.345681	0.617474	0.738246	-0.71595	0.416066	background
Tb927.8.790	-1.10935	0.235078	-0.730168	0.139803	1.14884	0.642856	-0.574368	0.279007	background
Tb927.11.3260	0.550497	0.462899	0.205518	0.60254	0.912318	0.338017	0.290015	0.539499	background
Tb927.8.8170	0.720836	0.301518	-0.340769	0.386878	3.33373	0.0244116	-0.37326	0.428797	background
Tb927.11.10720	-0.391356	0.570731	-0.0751848	0.891387	-0.379253	0.635345	2.11561	0.0161814	background
Tb927.10.5850	-0.689728	0.438159	0.407872	0.37075	-1.67625	0.0878654	0.686735	0.19193	background
Tb927.11.13730	-0.201287	0.802	-0.311066	0.427995	-1.02535	0.239965	-0.326804	0.479058	background
Tb927.10.13720	0.132773	0.875701	0.155884	0.741212	0.171723	0.84845	0.250372	0.637864	background
Tb927.3.5340	-0.234356	0.772119	0.155163	0.7688	-0.320327	0.70892	0.362872	0.502874	background
Tb927.9.6130	0.436988	0.538326	0.16009	0.695793	0.559831	0.497629	0.229707	0.627232	background
Tb927.9.14220	-0.200687	0.798281	0.159199	0.697486	-0.209138	0.808714	0.189512	0.699207	background
Tb927.4.2750	-0.0291302	0.97399	0.0255472	0.962654	-0.0234442	0.984021	0.0157362	0.982515	background
Tb927.10.11140	0.3944	0.7475	-0.170747	0.690155	1.132	0.351222	-0.222422	0.638185	background
Tb927.5.2320	-0.255705	0.744341	-0.103784	0.84946	-0.222048	0.805838	0.0964905	0.892494	background
Tb927.7.1920	-0.127672	0.877471	0.0581978	0.900431	-0.120216	0.891662	-0.186918	0.696758	background
Tb927.6.4710	0.704931	0.394554	-0.244121	0.565719	0.984904	0.38113	-0.370556	0.483921	background
Tb927.10.3500	0.226247	0.810796	0.147009	0.714006	0.128675	0.93328	0.144272	0.76233	background
Tb927.11.550	-0.573353	0.439356	0.103205	0.826266	-0.724592	0.366235	0.493423	0.315697	background
Tb11.v5.0198.1	-0.0339435	0.97032	0.138921	0.77244	-0.107227	0.90109	0.202824	0.65789	background
Tb927.10.5380	0.0367995	0.968946	-0.193215	0.631841	-0.115553	0.895463	-0.150364	0.746014	background
Tb927.11.1250	-0.115683	0.891222	-0.0644821	0.888961	-0.178765	0.836912	-0.17456	0.705756	background
Tb927.11.16470	0.124932	0.901715	0.332421	0.413666	-0.850578	0.3518	0.309294	0.505135	background
Tb927.11.15970	0.456306	0.538361	0.168514	0.67887	0.293317	0.752811	0.127725	0.797924	background
Tb927.4.1270	0.293537	0.711165	0.250027	0.546949	0.654554	0.421246	0.421529	0.38601	background
Tb927.10.11780	-0.723255	0.301585	0.00524636	0.994587	-0.722192	0.396093	-0.464578	0.532811	background
Tb927.8.5070	-0.0933355	0.922369	-0.158683	0.696194	0.520642	0.512238	-0.136485	0.773652	background
Tb927.10.1630	0.303614	0.704449	-0.230028	0.574125	0.493951	0.584202	-0.296914	0.545012	background
Tb927.11.7780	-0.51248	0.479965	-0.224152	0.559295	-2.84527	0.0312905	-0.251146	0.583215	background
Tb927.11.6050	0.196063	0.809361	0.159377	0.696985	0.358791	0.683744	0.203531	0.66496	background
Tb927.11.6410	0.779703	0.291151	0.426804	0.303741	-0.385854	0.671256	0.231732	0.618037	background
Tb927.1.750	-0.244258	0.754708	-0.0156114	0.975477	-0.267339	0.749212	-0.151928	0.745106	background
Tb927.2.4060	-0.21991	0.790102	-0.0341317	0.952227	-0.199372	0.829356	0.0895916	0.883104	background
Tb927.7.2900	0.301582	0.677751	0.308161	0.450268	0.242879	0.77545	-0.333985	0.482424	background
Tb927.9.11030	-0.0433755	0.96308	0.0119108	0.981916	-0.00750279	0.994144	-0.000616009	0.999173	background
Tb927.3.5350	-0.370723	0.70779	-0.47677	0.266978	-2.72348	0.0321086	-0.550706	0.269671	background
Tb927.8.4880	0.2431	0.7748	0.133225	0.794516	0.112526	0.903617	-0.0242021	0.971932	background
Tb927.7.6820	-0.0250819	0.976094	-0.453629	0.351767	0.0675957	0.942774	-0.366072	0.464615	background
Tb927.9.9670	-0.0307351	0.973604	-0.130249	0.77159	-0.037777	0.971433	-0.130969	0.804063	background
Tb927.11.14440	0.190722	0.845367	-0.285729	0.517629	0.158441	0.899392	-0.281077	0.597237	background
Tb927.10.9970	-0.0672313	0.948932	-0.0207657	0.964459	-0.0633956	0.955941	-0.0204171	0.974981	background
Tb927.11.4200	0.0871698	0.936815	-0.150545	0.776265	0.234594	0.821014	-0.185728	0.739076	background
Tb927.6.740	0.402606	0.643169	0.34641	0.406873	0.619648	0.577219	0.367742	0.459773	background
Tb927.11.14560	0.0585438	0.954363	0.0243597	0.962125	0.0947869	0.914786	0.0624915	0.902138	background
Tb927.7.650	0.239815	0.755643	0.0887409	0.848747	0.304794	0.708993	0.416211	0.384236	background
Tb927.6.400	-0.112003	0.922251	-0.194718	0.615879	-1.28464	0.487409	-0.198365	0.666818	background
Tb927.10.7630	0.198007	0.804993	-0.131636	0.749293	0.529582	0.500007	-0.210194	0.645398	background
Tb927.5.570	0.499414	0.497926	0.173346	0.666811	1.05849	0.226629	0.306503	0.502874	background
Tb927.11.10230	0.0899592	0.926439	-0.0742417	0.863831	-0.171625	0.850087	-0.058449	0.908785	background
Tb927.7.6340	0.194709	0.805302	0.513083	0.246027	-0.083948	0.928486	0.33309	0.485633	background
Tb927.7.5280	0.0879873	0.926439	0.284572	0.515547	0.40681	0.612202	0.358736	0.443117	background
Tb927.10.6220	0.249247	0.807616	-0.148673	0.71183	-0.693922	0.478517	-0.126205	0.795609	background
Tb927.10.9670	-0.0647786	0.94609	-0.0760397	0.891423	-0.109426	0.899429	-0.178652	0.705141	background
Tb927.8.2390	-0.250208	0.738536	0.0427497	0.931602	-0.2626	0.752811	0.663081	0.212798	background
Tb927.8.6690	0.306715	0.759656	0.0694169	0.875398	0.656195	0.441067	0.122579	0.800869	background
Tb927.8.6260	0.330903	0.742002	0.38211	0.426002	1.15557	0.191527	0.529582	0.290435	background
Tb927.10.15400	-0.816684	0.403533	-0.40945	0.355497	-0.347023	0.817407	-0.33466	0.538917	background
Tb927.11.11770	-0.100839	0.918501	-0.378722	0.394908	-0.637478	0.478517	-0.422729	0.40114	background
Tb927.9.6060	0.0858798	0.926439	-0.302506	0.473143	-0.285237	0.735878	-0.243565	0.599193	background
Tb927.10.9000	-0.432365	0.533744	-0.364364	0.387975	-0.245879	0.773762	0.270429	0.562757	background
Tb927.5.2330	0.422558	0.585815	0.186307	0.674532	0.169506	0.858202	0.000319254	0.999509	background
Tb927.9.12500	-1.55458	0.0694894	-0.472225	0.318838	-0.949068	0.332206	0.160863	0.809424	background
Tb927.3.4220	0.0470256	0.960026	0.116093	0.830091	0.0486542	0.962882	0.117263	0.855263	background
Tb927.11.14930	-0.338187	0.665686	0.0383816	0.934194	-0.274898	0.768622	0.0277476	0.963832	background
Tb927.5.860	-0.281542	0.76442	0.0287397	0.952949	-0.338721	0.752811	0.0410686	0.939651	background
Tb927.11.14100	0.79126	0.253457	0.379654	0.384802	0.624933	0.466774	-0.0675454	0.920933	background
Tb927.9.12110	0.599755	0.380558	0.235273	0.599782	0.643528	0.426959	0.829437	0.406802	background
Tb927.5.2960	0.169093	0.877256	0.0139996	0.978639	0.0927053	0.917518	-0.0166701	0.978082	background
Tb927.10.2240	0.281364	0.727426	0.343579	0.524841	0.0673522	0.946592	0.029286	0.967232	background
Tb927.7.1580	0.249185	0.76442	-0.0883351	0.846486	0.084191	0.928486	0.0222583	0.971917	background
Tb927.11.2270	0.264163	0.735026	-0.10497	0.836127	0.218684	0.80805	0.0756885	0.896861	background
Tb927.10.13130	0.115855	0.902682	0.339366	0.479363	0.179887	0.861293	0.35584	0.533915	background
Tb927.7.6910	0.0226828	0.979498	0.364646	0.428758	0.0218069	0.985356	0.364594	0.505207	background
Tb927.7.3880	0.541029	0.551861	-0.101349	0.815003	-0.105653	0.915423	-0.034123	0.953508	background
Tb927.9.12070	0.244802	0.752529	0.271414	0.499145	0.675076	0.404355	0.416418	0.384759	background
Tb927.10.14930	0.449189	0.547845	0.310364	0.468556	-0.0482958	0.961345	0.0537907	0.918709	background
Tb11.v5.0837.1	-0.501493	0.469038	0.0129713	0.982624	-0.506195	0.526357	0.540141	0.352961	background
Tb927.4.3510	0.0615192	0.947464	-0.215951	0.649807	0.0785933	0.93328	-0.488283	0.38203	background
Tb927.10.14500	-0.320114	0.658227	-0.0541852	0.912246	-0.289999	0.723307	0.372927	0.435019	background
Tb927.10.9600	-0.077388	0.932332	0.208644	0.681486	-0.00711772	0.994392	-0.0162789	0.978634	background
Tb927.10.15720	-0.325932	0.647502	0.0179787	0.970128	-0.33418	0.681763	0.275474	0.560958	background
Tb927.10.11580	0.743282	0.302935	0.320849	0.478467	0.491328	0.576799	-0.0541139	0.935771	background
Tb927.11.3710	0.167878	0.847334	0.237083	0.579228	-0.160559	0.854622	0.118472	0.807788	background
Tb927.10.11340	0.288856	0.716387	0.332953	0.399588	-0.071935	0.95643	0.323313	0.485633	background
Tb927.9.7180	-0.0854086	0.930272	0.263444	0.510638	0.0185273	0.989338	0.260149	0.579828	background
Tb927.9.8450	-0.488558	0.492779	-0.391035	0.37075	-0.326228	0.723307	-0.222518	0.690243	background
Tb927.7.1860	0.0500174	0.95759	0.254714	0.520398	0.0571623	0.953385	0.377578	0.43305	background
Tb927.11.12220	0.319679	0.68698	-0.368912	0.416528	0.772119	0.349169	-0.606981	0.240269	background
Tb11.v5.0572.1	0.717054	0.375239	0.0367793	0.943264	0.700953	0.480137	-0.0124839	0.986688	background
Tb927.7.760	-0.184423	0.81972	0.0643262	0.909414	-0.218748	0.799431	0.409869	0.389156	background
Tb927.10.830	-1.14283	0.218543	-0.331349	0.489446	-0.665944	0.540271	-0.0380525	0.961995	background
Tb927.7.2820	0.0975345	0.913284	0.391382	0.345681	0.389283	0.648118	0.425667	0.389046	background
Tb927.9.8400	0.679792	0.362799	0.254079	0.529481	0.157817	0.872725	0.0443572	0.936393	background
Tb927.2.3020	0.178447	0.835629	-0.186723	0.784	0.11353	0.90109	0.0390381	0.964833	background
Tb927.10.9650	0.0941827	0.914042	0.151096	0.705742	0.262822	0.752811	0.20905	0.646751	background
Tb927.11.4660	0.398758	0.587298	-0.0800119	0.869504	0.321798	0.699096	0.238133	0.636538	background
Tb11.v5.0847.1	0.845823	0.2236	0.0329917	0.94615	0.863087	0.312772	0.20042	0.733023	background
Tb11.v5.0748.1	-0.00516299	0.995868	-0.0560645	0.899452	0.274888	0.739184	-0.0550538	0.914724	background
Tb927.10.13330	-0.135228	0.908456	0.25988	0.621544	-0.0270949	0.987528	0.24067	0.707275	background
Tb927.10.5950	-0.819324	0.231197	-0.337726	0.412432	-1.13852	0.201422	-0.910357	0.133239	background
Tb927.6.4750	-0.140053	0.87862	-0.332534	0.428758	-0.499695	0.61483	-0.36549	0.459773	background
Tb927.11.9120	-0.957811	0.160278	-0.342373	0.403746	-1.11065	0.201646	-1.66708	0.0441558	background
Tb927.11.9890	0.184617	0.840315	0.12564	0.770736	-0.212082	0.808714	0.0717477	0.889069	background
Tb927.7.1420	0.532359	0.444141	0.327613	0.438096	0.716385	0.382433	0.819094	0.160449	background
Tb927.7.4000	-0.460894	0.509802	-0.468671	0.302673	-0.562013	0.500007	-0.675909	0.376095	background
Tb927.10.5670	0.219274	0.805553	-0.0829412	0.883753	0.178216	0.859571	0.00117569	0.999173	background
Tb927.5.2140	0.345191	0.647502	0.0437722	0.931133	0.394712	0.633847	0.232317	0.632444	background
Tb927.6.4130	-0.926406	0.253457	-0.569478	0.196588	-1.87955	0.194968	-0.618643	0.241056	background
Tb927.7.670	-0.0511002	0.95759	0.0942293	0.898139	-0.0352714	0.970826	-0.182032	0.718403	background
Tb927.1.4490	0.237815	0.798825	-0.131454	0.781762	0.35801	0.730887	-0.180461	0.730919	background
Tb927.11.4510	0.655382	0.357843	-0.0539606	0.908238	0.520943	0.509662	0.198014	0.666025	background
Tb927.5.670	-0.386425	0.652777	-0.0704954	0.875244	-0.135407	0.876775	0.037938	0.945327	background
Tb927.11.3140	-0.597323	0.449397	-0.331406	0.419343	-0.213668	0.844891	-0.269767	0.591374	background
Tb927.7.6190	1.11116	0.11572	1.15574	0.0594143	0.542191	0.523727	0.700343	0.213494	abundance
Tb927.10.2380	0.104912	0.906211	0.298879	0.455613	0.51017	0.523727	0.349595	0.456071	background
Tb927.10.10850	-0.189171	0.819033	-0.029855	0.951259	-0.120768	0.891662	0.0452664	0.931386	background
Tb927.8.4430	-0.138805	0.877471	0.183287	0.684686	-0.394085	0.620359	0.281445	0.540751	background
Tb927.10.10520	-0.149556	0.877471	0.230969	0.584481	-0.0497348	0.970134	0.21861	0.6697	background
Tb927.9.12730	0.0387618	0.967781	-0.160841	0.69302	0.256182	0.762463	-0.176969	0.704054	background
Tb927.4.4350	0.18465	0.826364	0.0158901	0.9761	0.204732	0.811649	0.160074	0.729589	background
Tb927.4.3890	-0.643456	0.368785	-0.364214	0.369175	-0.0131404	0.991632	-0.217849	0.646751	background
Tb927.10.5170	0.324031	0.661096	0.022955	0.961866	0.404586	0.615421	0.0943544	0.848201	background
Tb927.6.3100	0.228558	0.78398	-0.278779	0.526463	0.58877	0.462815	-0.444508	0.364055	background
Tb927.10.6640	0.377421	0.58988	-0.338358	0.513872	0.300296	0.714331	1.01558	0.125968	background
Tb927.10.11300	-0.424196	0.546826	-0.0879814	0.875159	-0.390479	0.62713	0.685187	0.237908	background
Tb927.10.10050	0.679506	0.325484	0.444183	0.323661	0.381813	0.64124	-0.160454	0.760324	background
Tb927.11.11080	-0.22218	0.771739	0.104565	0.805588	-0.164937	0.849334	-0.23331	0.612158	background
Tb927.5.2410	-0.152797	0.851082	0.0287145	0.954166	-0.167465	0.847867	0.326773	0.478538	background
Tb927.2.4200	0.27404	0.774945	0.491688	0.256707	-1.44993	0.15778	0.429415	0.377945	background
Tb927.4.2140	0.532255	0.442317	0.120764	0.774871	0.677014	0.404355	0.487336	0.322605	background
Tb927.9.11330	0.208064	0.798825	0.251718	0.526463	-0.275866	0.741308	0.157538	0.736633	background
Tb927.10.14010	0.0288035	0.97399	0.266098	0.508764	-0.209738	0.808714	0.243503	0.598045	background
Tb927.1.3560	0.630612	0.421119	0.0932839	0.831592	0.268379	0.755313	-0.0474904	0.927494	background
Tb927.11.14410	0.0801669	0.930272	-0.2894	0.505996	0.218956	0.805838	-0.352866	0.478538	background
Tb927.6.2690	-0.0513896	0.957342	-0.0136448	0.979541	-0.04856	0.960789	0.0357473	0.952744	background
Tb927.11.6320	-0.0224713	0.978927	-0.0814737	0.871485	-0.0338069	0.97332	-0.0967152	0.871401	background
Tb927.11.2950	0.242289	0.75097	0.116484	0.794556	0.285956	0.729484	0.445003	0.377945	background
Tb927.11.15120	0.277383	0.724901	0.214029	0.676866	0.242876	0.797497	0.135485	0.841345	background
Tb927.5.4310	0.205808	0.810427	0.0166309	0.975477	0.225196	0.806757	0.107888	0.837317	background
Tb927.8.6270	0.523049	0.474619	0.0899344	0.857949	0.433948	0.594451	-0.336856	0.512948	background
Tb927.10.5930	-0.212527	0.835599	-0.661316	0.154686	2.02604	0.20727	-0.640127	0.218436	background
Tb927.5.1010	-0.0339005	0.97032	0.289375	0.530827	-0.136676	0.876592	0.384775	0.416712	background
Tb927.11.10280	0.725426	0.307289	0.286503	0.532627	0.634026	0.471145	0.033637	0.966778	background
Tb927.10.14980	-0.694967	0.336096	-0.235767	0.612189	-0.583078	0.504911	0.0621005	0.945344	background
Tb11.v5.0148.1	0.503786	0.503303	0.136898	0.754304	0.228346	0.795821	-0.0883306	0.860533	background
Tb927.9.5380	0.213513	0.805302	-0.12458	0.77244	0.536734	0.505964	-0.196056	0.670602	background
Tb927.10.13600	-0.575329	0.426358	-0.237421	0.60254	-0.685523	0.419634	-0.583855	0.359949	background
Tb927.9.1380	-0.0412298	0.968788	0.180085	0.661305	0.370362	0.684908	0.168626	0.720185	background
Tb927.10.2370	-0.178767	0.829779	0.181981	0.656483	0.00749412	0.994361	0.104008	0.837101	background
Tb927.5.2290	0.698667	0.343629	0.280134	0.489446	0.698725	0.56115	0.280148	0.564777	background
Tb927.11.3910	0.114491	0.907116	-0.177317	0.660981	0.676768	0.427836	-0.202251	0.662773	background
Tb927.11.6210	-0.773463	0.29682	-0.425558	0.350063	-0.493638	0.592231	-0.191038	0.726414	background
Tb927.10.14570	-0.570287	0.465733	-0.0794652	0.853001	-0.681224	0.47594	-0.0999815	0.841565	background
Tb927.10.810	0.219658	0.841557	-0.0445552	0.926359	0.0442961	0.969829	-0.0104122	0.987356	background
Tb927.11.5430	0.136354	0.87862	0.0671777	0.898139	0.146733	0.880607	0.0826465	0.892403	background
Tb927.4.2880	-0.26707	0.754708	-0.0846469	0.850492	-0.291533	0.770173	-0.093083	0.858712	background
Tb927.11.11620	-0.116752	0.892103	0.0490734	0.918273	-0.0668735	0.945723	0.000515299	0.999173	background
Tb927.4.2890	-0.378411	0.655152	-0.254653	0.532627	-0.28998	0.798063	-0.239139	0.636296	background
Tb927.4.3930	-0.746493	0.270539	-0.959882	0.111343	-0.975082	0.247847	-3.31927	0.00616089	background
Tb927.8.6490	-1.38119	0.133508	-0.510829	0.238961	0.874109	0.445473	-0.298388	0.531643	background
Tb927.6.170	-0.375498	0.640416	-0.227447	0.581893	-0.646666	0.478853	-0.314721	0.530085	background
Tb927.7.6410	0.50965	0.525879	-0.103702	0.823338	0.4934	0.617547	-0.0896097	0.876853	background
Tb927.4.2200	0.742135	0.284611	0.0368806	0.938198	0.64908	0.417356	-0.257248	0.573202	background
Tb927.8.7710	-0.342119	0.642248	-0.143058	0.722557	-0.721295	0.369447	-0.268251	0.557546	background
Tb927.7.4340	0.429222	0.553989	0.41206	0.33701	-0.209742	0.809135	0.147381	0.753937	background
Tb927.3.2650	-0.364955	0.63885	-0.468552	0.337299	-0.842774	0.331505	-0.75295	0.184306	background
Tb927.8.1740	-0.057406	0.955859	-0.0159875	0.97553	-0.031967	0.974104	0.0185095	0.976965	background
Tb927.7.6000	-1.35536	0.0895407	-0.596719	0.215681	-0.316391	0.703087	0.148657	0.754957	background
Tb927.11.5050	-0.591279	0.434517	0.162673	0.752696	-0.456518	0.584082	-0.33093	0.542163	background
Tb927.7.5970	-0.637	0.468163	-0.652091	0.210967	0.678591	0.415082	-0.348235	0.458629	background
Tb927.10.2630	0.134407	0.894183	-0.165118	0.71924	0.203897	0.856956	-0.179388	0.743874	background
Tb11.v5.0465.1	-0.257843	0.738536	0.105086	0.838186	-0.324147	0.69261	0.436075	0.388815	background
Tb927.2.2720	0.317313	0.684122	0.23182	0.558761	0.0545452	0.958635	0.175668	0.718592	background
Tb927.6.200	-1.89842	0.0500556	-0.998126	0.0787548	2.23309	0.224585	-0.671971	0.21704	abundance
Tb927.9.1530	0.284912	0.735026	-0.00939287	0.987522	0.301442	0.720295	-0.141007	0.771288	background
Tb927.8.7670	-1.06733	0.199702	-0.505826	0.266807	-1.33038	0.312162	-0.589773	0.295224	background
Tb927.11.1540	0.127778	0.886472	-0.0215819	0.969156	0.119272	0.900551	0.00981894	0.989329	background
Tb927.10.2620	0.513013	0.494425	0.0174349	0.979674	0.528601	0.501247	0.588982	0.245956	background
Tb927.9.8815	0.0843951	0.931721	0.00226493	0.996262	0.0778165	0.939427	-0.00577058	0.993718	background
Tb927.7.4570	-1.10714	0.253457	-0.950998	0.0841809	-5.15482	0.0390102	-1.17563	0.0648143	background
Tb927.10.2270	0.499648	0.463165	0.210163	0.64412	0.518158	0.510506	3.06589	0.00729857	background
Tb927.9.2160	0.29581	0.711495	0.050383	0.91424	0.0819564	0.928644	-0.0190531	0.976225	background
Tb927.10.2020	-0.567617	0.436183	-0.243246	0.549192	-0.569717	0.542893	-0.245209	0.65789	background
Tb927.6.2210	0.27006	0.727149	0.36486	0.386878	0.561606	0.514688	0.496877	0.335086	background
Tb927.2.5150	0.0543469	0.957342	0.0113228	0.983457	0.0354895	0.970806	-0.0211371	0.973054	background
Tb927.10.620	1.6906	0.0469057	1.12733	0.0914886	0.641398	0.426959	-0.665315	0.207706	abundance
Tb927.7.4460	-0.0271541	0.975863	0.0722333	0.870887	0.0628101	0.948275	0.0566534	0.913718	background
Tb927.7.3500	-0.400026	0.560896	0.00243733	0.99631	-0.399868	0.616913	-1.51334	0.0650751	background
Tb927.11.7240	0.432663	0.536298	0.176188	0.794556	0.391106	0.624922	-1.25962	0.0806446	background
Tb927.11.1840	-0.174835	0.845643	0.470078	0.27073	1.02856	0.248164	0.418539	0.386614	background
Tb927.11.4450	-0.0368477	0.96937	-0.216403	0.610528	0.220866	0.798839	-0.187914	0.685538	background
Tb927.10.9330	-0.267296	0.744435	-0.00928191	0.987522	-0.28509	0.739184	-0.108508	0.828089	background
Tb927.10.11700	-0.352202	0.648217	-0.630987	0.261322	-0.322734	0.75383	-0.605823	0.395821	background
Tb927.11.5300	-0.22486	0.781765	-0.0677568	0.875159	-0.00776613	0.994144	-0.0251566	0.967131	background
Tb11.v5.0579.1	0.281725	0.709488	-0.18245	0.738368	0.348955	0.669879	-0.775573	0.189168	background
Tb927.11.12540	-0.0363639	0.969146	0.213367	0.601983	-0.139	0.878173	0.228766	0.636665	background
Tb927.5.1520	-0.136192	0.874175	0.133659	0.752583	-0.192505	0.833127	0.153045	0.753219	background
Tb927.10.6190	0.282027	0.728899	-0.103564	0.829448	0.373014	0.674539	-0.218274	0.671189	background
Tb927.3.3690	0.217566	0.781438	0.416663	0.369613	0.136675	0.882006	0.298825	0.586916	background
Tb927.11.7820	1.23364	0.0938292	0.848029	0.134102	1.9213	0.0649234	2.32218	0.0136177	translation
Tb927.11.14210	0.303927	0.692922	0.440553	0.304141	-0.35762	0.662649	0.25297	0.583306	background
Tb927.9.12490	0.0283047	0.97457	0.234341	0.557467	0.262544	0.783567	0.243747	0.606039	background
Tb927.7.4420	-0.522914	0.445625	0.145466	0.727299	-0.505682	0.521767	-0.449962	0.389046	background
Tb927.8.3100	0.754735	0.297109	0.167145	0.763544	0.737444	0.410573	0.0391221	0.971932	background
Tb927.7.6610	0.0533428	0.957342	-0.0372041	0.947705	0.0618724	0.951091	-0.0662867	0.914508	background
Tb927.9.14120	0.295956	0.703371	0.624461	0.162585	3.32742	0.0186655	0.681443	0.192091	background
Tb927.2.4930	-0.0303921	0.972084	0.0128968	0.980437	-0.0354612	0.970927	0.0226187	0.9719	background
Tb927.1.1960	-0.621676	0.437524	0.227944	0.559295	-0.521637	0.601965	0.217826	0.646771	background
Tb927.6.4640	0.429115	0.577919	0.189857	0.623136	-1.60294	0.110614	0.165405	0.720299	background
Tb927.10.14330	0.47365	0.500747	0.136718	0.752907	0.369916	0.654406	-0.141731	0.797924	background
Tb11.v5.0838.1	0.704091	0.313842	0.286993	0.468556	0.586182	0.495265	0.261172	0.585139	background
Tb927.10.14320	-0.223853	0.799442	0.029882	0.951389	-0.107301	0.90109	-0.0270601	0.963832	background
Tb927.11.10120	-0.0795095	0.930987	0.412463	0.360627	-0.0697172	0.942774	0.408219	0.450805	background
Tb927.7.6970	0.162905	0.841107	0.0478989	0.920567	0.195889	0.820948	0.275969	0.545912	background
Tb927.8.3950	-0.0677585	0.943975	0.198734	0.632901	-0.280753	0.743138	0.234312	0.621587	background
Tb927.4.5060	-0.963432	0.164793	-0.548656	0.292697	-0.944866	0.272745	-0.351057	0.766517	background
Tb927.2.5870	-0.0749257	0.957342	-0.00380048	0.994732	-0.0938419	0.934751	-0.0139748	0.982515	background
Tb927.8.2620	0.0617436	0.951885	0.163973	0.753205	0.132967	0.891211	0.195225	0.737624	background
Tb927.10.13820	-0.293377	0.693077	-0.136552	0.781219	-0.339118	0.680351	-0.494288	0.370348	background
Tb927.7.5350	0.507307	0.484703	0.311162	0.479032	0.45902	0.603517	0.265433	0.619604	background
Tb927.11.2620	-0.405447	0.677362	-0.702887	0.144696	-2.72245	0.138923	-0.760168	0.170838	background
Tb927.9.8670	-0.362163	0.613541	0.0182687	0.9712	-0.347646	0.668043	-0.415953	0.388815	background
Tb927.1.2210	-1.22651	0.136611	-1.04077	0.0841809	0.732658	0.382433	-0.398396	0.405562	abundance
Tb927.11.9080	0.254479	0.740741	0.203313	0.597185	1.37408	0.138923	0.221344	0.628153	background
Tb927.10.870	0.33764	0.6574	0.560367	0.200814	0.183619	0.868996	0.551486	0.277329	background
Tb927.8.5020	-0.227903	0.798753	-0.360347	0.396999	0.576498	0.488352	-0.266973	0.562313	background
Tb927.11.11210	-0.641924	0.440924	-0.0301468	0.953753	-0.573695	0.499732	0.180004	0.713867	background
Tb927.11.5020	0.0614688	0.954735	0.381267	0.460242	0.0709335	0.953896	0.382766	0.541754	background
Tb927.11.3850	0.217495	0.806766	0.304857	0.444677	1.37494	0.189546	0.34947	0.453796	background
Tb927.11.3640	0.34276	0.67935	-0.211435	0.599741	-0.244912	0.789525	-0.111758	0.821193	background
Tb927.6.430	-0.988465	0.295145	-0.421731	0.337299	-0.601878	0.732617	-0.359947	0.512616	background
Tb927.11.1420	-2.13031	0.043298	-1.06674	0.0748388	-3.39752	0.247498	-1.23108	0.114021	abundance
Tb927.11.9370	-0.0800657	0.957606	0.154524	0.741982	0.48397	0.549502	0.132947	0.78183	background
Tb927.6.1920	-0.177696	0.87312	0.0871558	0.8558	-0.329091	0.766722	0.12114	0.82147	background
Tb927.2.3660	0.416418	0.59539	0.556825	0.205051	-0.814749	0.560826	0.505852	0.318843	background
Tb09.v4.0066	-0.604754	0.469871	-0.328574	0.452868	-1.17243	0.247847	-0.500012	0.348796	background
Tb927.11.12600	0.349536	0.681156	-0.0229259	0.972185	0.345634	0.732516	0.0252849	0.977917	background
Tb927.8.2810	-0.418305	0.547817	0.105094	0.821862	-0.425636	0.599463	0.189713	0.76507	background
Tb927.2.5410	0.220811	0.77918	-0.0870292	0.877205	0.217546	0.80805	-0.0503297	0.948984	background
Tb927.10.2570	0.535234	0.445625	-0.223615	0.560758	0.631094	0.469702	-0.237589	0.606039	background
Tb927.5.1910	-0.965313	0.165862	-0.723562	0.233595	-0.745379	0.361919	1.62653	0.0912699	background
Tb927.6.770	-1.74239	0.0463984	-0.405067	0.392007	-2.20392	0.0573975	-1.41691	0.0608386	background
Tb927.1.1230	0.748521	0.293636	-0.395399	0.416565	1.04481	0.225664	-1.23565	0.0669825	background
Tb927.6.3560	-0.894819	0.233445	-0.279211	0.543064	-0.555195	0.501808	0.322927	0.509746	background
Tb927.10.12810	-0.837403	0.386052	-0.252742	0.517066	-4.19811	0.0109035	-0.315092	0.489702	background
Tb927.6.2060	0.147088	0.866144	-0.151243	0.709925	-0.0665597	0.947635	-0.123555	0.802611	background
Tb927.5.2620	1.70784	0.0749231	0.907852	0.0914886	-0.73989	0.670957	0.623267	0.255394	abundance
Tb927.11.16080	0.402929	0.557399	0.310124	0.526949	0.370459	0.644752	-2.33384	0.0168442	background
Tb927.5.1100	0.155094	0.851082	0.278498	0.4844	0.452321	0.663152	0.306326	0.509746	background
Tb927.11.13270	-0.457675	0.551812	0.0659595	0.899485	-0.549679	0.485916	0.393854	0.406587	background
Tb927.6.1090	0.00649622	0.995095	0.17589	0.683281	-0.157746	0.859571	0.171369	0.720185	background
Tb927.2.5630	0.199295	0.812784	0.391273	0.33701	-1.26448	0.157941	0.340905	0.462287	background
Tb927.11.3610	-0.888618	0.468163	-0.239597	0.552077	0.908219	0.304636	-0.126934	0.794118	background
Tb927.9.6920	-0.191266	0.807616	0.0316128	0.953753	-0.193423	0.826379	0.120148	0.834752	background
Tb927.11.3120	0.0453948	0.959734	0.18325	0.673669	0.103791	0.905448	0.325666	0.479058	background
Tb927.2.4700	0.431464	0.57303	-0.100878	0.831592	0.355728	0.703798	0.00200067	0.99861	background
Tb927.10.12620	0.224646	0.781765	0.239391	0.532556	-0.852888	0.327108	0.21538	0.637842	background
Tb927.11.16970	0.213315	0.784068	0.0898139	0.839615	0.307853	0.705508	0.290075	0.526805	background
Tb927.8.4390	-0.0735095	0.942805	-0.29844	0.517731	-0.225981	0.82664	-0.320149	0.557375	background
Tb927.10.3200	0.798458	0.242141	0.680881	0.143181	0.428751	0.844891	0.645198	0.221963	background
Tb927.11.7080	0.00800609	0.993363	0.0357689	0.941654	0.0234291	0.983766	0.0375417	0.948984	background
Tb927.11.13230	0.571304	0.465733	0.606145	0.212184	1.25188	0.340396	0.79302	0.202298	background
Tb927.5.1210	0.242293	0.758673	0.297282	0.489446	0.103329	0.91131	0.189483	0.706588	background
Tb927.9.1560	0.551123	0.439902	-0.029706	0.953255	0.520448	0.516617	0.276646	0.576488	background
Tb927.10.13960	0.255063	0.735026	0.118752	0.783198	0.283959	0.730535	0.925558	0.107017	background
Tb927.5.1460	0.0709484	0.939449	0.0338789	0.943264	0.151025	0.861293	0.0638926	0.900115	background
Tb927.11.13060	0.309546	0.67935	0.152538	0.72338	0.182625	0.836043	-0.0930384	0.856376	background
Tb927.9.15470	-0.293344	0.696197	-0.205361	0.599741	-0.721102	0.375876	-0.330249	0.47646	background
Tb927.10.820	0.675387	0.343896	0.202692	0.705643	0.603417	0.479402	-0.238658	0.714733	background
Tb927.11.2230	0.108555	0.901981	0.229235	0.6036	0.173679	0.849108	0.290845	0.589626	background
Tb927.7.1060	0.257714	0.7358	-0.24336	0.55245	0.032438	0.973722	0.0347527	0.951837	background
Tb927.10.850	0.893506	0.252054	0.328189	0.405223	4.14965	0.0161415	0.398557	0.402557	background
Tb927.7.3920	-0.0155906	0.986392	-0.401706	0.442615	-0.295131	0.743008	-0.415743	0.440971	background
Tb927.10.7490	0.198667	0.816394	-0.307381	0.560277	0.0101513	0.992621	-0.109516	0.854145	background
Tb927.5.2560	-1.06042	0.138376	-0.965476	0.0841809	-2.20618	0.0503519	-1.84252	0.020785	abundance
Tb927.10.1420	0.15817	0.845643	0.319962	0.416845	-0.618943	0.438574	0.254901	0.576574	background
Tb927.9.15380	0.310447	0.681881	-0.159768	0.759201	0.309551	0.720871	-0.155676	0.807788	background
Tb11.v5.0894.1	0.406683	0.571675	-0.202355	0.611078	0.0942725	0.920051	-0.0666586	0.899322	background
Tb927.7.2840	0.102963	0.913821	0.302105	0.445514	1.04955	0.246159	0.320983	0.485867	background
Tb927.10.15230	-0.247438	0.748356	0.0341369	0.943471	-0.289809	0.724079	0.196614	0.671189	background
Tb927.11.4160	0.0486153	0.961364	0.141967	0.729143	-0.380179	0.67879	0.13369	0.783596	background
Tb927.11.12940	0.136883	0.87312	0.00076066	0.998572	0.134506	0.880363	-0.0225261	0.971244	background
Tb927.7.4970	-1.18116	0.100689	-0.576273	0.188024	-3.51911	0.0256125	-0.790001	0.151042	background
Tb927.4.2920	-0.224422	0.771739	-0.645831	0.164043	-0.8276	0.316683	-0.870248	0.120389	buffering
Tb11.v5.0233.1	-0.225014	0.805302	0.278611	0.494379	0.495056	0.602189	0.239047	0.61033	background
Tb927.3.4160	-0.461811	0.560896	0.175527	0.755449	-0.609765	0.478517	0.5162	0.374507	background
Tb927.8.2740	-0.247226	0.7475	0.0324663	0.953753	-0.25852	0.758346	0.443359	0.403903	background
Tb927.9.12770	0.340312	0.63296	0.268849	0.529802	0.225772	0.795821	-0.327077	0.527805	background
Tb927.11.5140	-0.0381391	0.968946	-0.267524	0.539878	0.192025	0.82664	-0.22577	0.625931	background
Tb927.6.3180	0.41848	0.569123	0.0926312	0.86288	0.382634	0.658355	-0.131385	0.841595	background
Tb927.8.3290	0.110546	0.902514	-0.142034	0.727844	-0.137058	0.880363	-0.112046	0.821193	background
Tb927.8.5160	-0.376443	0.700396	0.486194	0.373099	-0.795425	0.471722	0.613099	0.346286	background
Tb927.10.15360	-0.165465	0.847334	-0.064001	0.896001	-0.0834677	0.927935	0.0613789	0.903625	background
Tb927.6.140	-0.495223	0.467088	-0.472909	0.304043	-0.481994	0.542744	17.2299	1.27561e-05	background
Tb927.8.5620	1.15683	0.102121	0.493919	0.266978	0.763378	0.351062	-0.613363	0.282555	background
Tb927.2.280	0.691617	0.333404	-0.493798	0.308978	0.796192	0.405907	-0.658542	0.331646	background
Tb927.5.4150	0.305229	0.7358	-0.00712366	0.991785	0.310387	0.757822	-0.127982	0.840256	background
Tb927.7.500	0.307857	0.721899	-0.238621	0.538467	1.67184	0.0851253	-0.292007	0.523812	background
Tb927.10.15300	-0.118426	0.895694	-0.328557	0.416699	0.728496	0.364358	-0.282647	0.53882	background
Tb927.8.5760	0.544953	0.496017	0.374008	0.351739	1.05511	0.341963	0.392714	0.416135	background
Tb927.11.12470	0.816562	0.270539	0.0361351	0.942777	0.877061	0.311359	0.337742	0.497467	background
Tb11.v5.0603.1	0.171263	0.835599	0.169001	0.696846	0.0143601	0.990142	0.00344316	0.996481	background
Tb927.5.580	0.0300569	0.97457	-0.0498531	0.934287	-0.0178646	0.987403	-0.0186821	0.976907	background
Tb927.4.120	0.411691	0.554917	-0.358996	0.370501	-0.13684	0.876704	-0.170566	0.713699	background
Tb927.6.1550	-0.718443	0.297169	-0.666774	0.213843	-0.396124	0.62831	0.424745	0.525317	background
Tb927.7.7200	1.03103	0.370316	0.373041	0.349779	18.3554	0.000301778	0.391691	0.408168	background
Tb11.v5.0494.1	-0.958891	0.230054	-0.366363	0.390484	0.019933	0.985315	-0.0121193	0.985172	background
Tb927.7.4110	-2.03642	0.0703849	-0.482806	0.302146	-0.364624	0.689988	0.0677907	0.89613	background
Tb927.1.3880	-0.0853386	0.930272	0.144998	0.734486	-0.208179	0.828413	0.163783	0.741468	background
Tb927.8.840	-1.2308	0.085622	-0.323875	0.410139	-1.11401	0.203793	-0.293936	0.533915	background
Tb927.11.14730	-0.229377	0.799442	-0.508315	0.369881	-0.0919873	0.939427	-0.445629	0.509246	background
Tb927.5.3590	-0.974237	0.165917	-0.0387857	0.940544	-1.00945	0.235577	-0.940647	0.115574	background
Tb927.10.8490	-0.280648	0.784112	-0.479033	0.314624	-0.883365	0.454003	-0.538917	0.338516	background
Tb927.10.5400	-1.04785	0.178526	-0.61306	0.231369	-0.258287	0.774229	0.0448777	0.937905	background
Tb927.11.14270	0.500919	0.588421	0.0853954	0.863371	0.286604	0.743008	-0.0950949	0.850531	background
Tb927.7.2390	-0.404028	0.623828	-0.773414	0.187029	-0.367414	0.773762	-0.759308	0.293924	background
Tb927.11.14990	-0.251807	0.781755	-0.541095	0.392261	0.0365938	0.977639	-0.368621	0.596119	background
Tb927.9.12400	-0.427667	0.541905	-0.221471	0.570324	-0.421623	0.624667	-0.218597	0.64157	background
Tb927.7.5220	-0.439486	0.567423	0.241051	0.541473	-0.290723	0.773043	0.214477	0.657046	background
Tb927.4.590	-1.12364	0.199838	-0.669539	0.197944	0.233422	0.797191	-0.159893	0.737297	background
Tb927.11.1680	0.113295	0.904587	0.0841275	0.864564	0.00606379	0.995104	0.00181609	0.99861	background
Tb927.10.3510	-0.60653	0.550195	0.118097	0.796103	-0.968036	0.403654	0.205843	0.670602	background
Tb927.3.3030	0.472736	0.564462	-0.120919	0.79249	0.512026	0.614359	-0.144168	0.786742	background
Tb927.3.3750	0.0690766	0.9401	-0.372217	0.422891	0.213972	0.804212	-0.549302	0.270135	background
Tb927.7.6690	1.62173	0.0441673	1.09952	0.0636304	0.398756	0.619026	-0.315992	0.499152	abundance
Tb927.11.10760	-0.0611001	0.949602	0.155434	0.752583	-0.153889	0.861293	0.235668	0.625931	background
Tb927.4.2000	-0.0421559	0.963486	0.231525	0.615224	0.136719	0.876726	0.18393	0.698238	background
Tb927.11.12040	-0.30077	0.726273	0.160658	0.781144	-0.434126	0.616913	0.384982	0.485301	background
Tb927.11.16160	0.241262	0.77364	0.0600894	0.91424	0.261576	0.788724	0.118479	0.845347	background
Tb927.9.14160	-0.719937	0.339505	-0.243692	0.618958	-0.615715	0.502161	-0.018962	0.985678	background
Tb927.11.2420	-0.0337719	0.971851	-0.194396	0.683157	-0.0673669	0.952185	-0.198389	0.722688	background
Tb927.7.3410	0.260432	0.749849	0.126286	0.7642	0.709689	0.378066	0.197343	0.66693	background
Tb927.5.1490	0.201243	0.823403	0.350705	0.452868	-0.264685	0.759394	0.219854	0.641073	background
Tb927.11.6370	0.0247177	0.977288	-0.211249	0.650967	0.115419	0.896504	-0.241671	0.633995	background
Tb927.3.1560	0.25641	0.752247	-0.139451	0.762335	0.31347	0.726366	-0.201463	0.698238	background
Tb927.11.7020	-0.0261272	0.976094	0.295419	0.51247	-0.24224	0.788724	0.317481	0.514658	background
Tb927.10.12590	0.243169	0.749849	0.393703	0.515547	0.215789	0.804212	-0.247375	0.733802	background
Tb927.7.7210	0.201838	0.79808	0.214235	0.621024	0.113847	0.896161	-0.22538	0.627571	background
Tb927.3.3760	-0.355722	0.63296	-0.556584	0.215681	-1.20122	0.183778	-0.730148	0.177568	background
Tb927.5.2820	1.0353	0.172772	0.106639	0.836109	1.06697	0.270097	0.280497	0.684234	background
Tb927.9.6110	0.51718	0.51951	0.0568835	0.900439	0.329914	0.716554	-0.0289702	0.962523	background
Tb927.10.2790	0.0161236	0.985739	0.221698	0.632277	0.123572	0.895535	0.229741	0.668625	background
Tb927.11.6810	0.0602201	0.95759	0.0630162	0.886295	0.172171	0.876704	0.06533	0.899231	background
Tb927.10.8820	0.589868	0.43733	0.535683	0.211245	-4.74441	0.615421	0.531302	0.282936	background
Tb927.9.4500	2.59411	0.0206109	1.38233	0.0519245	5.46448	0.00756139	2.4999	0.0108613	abundance
Tb927.11.10380	0.234906	0.827141	-0.048195	0.932583	0.337995	0.67879	-0.1566	0.737297	background
Tb05.5K5.160	0.19202	0.826891	0.298246	0.463363	-0.244189	0.803532	0.258549	0.584238	background
Tb927.11.9790	0.358857	0.642327	-0.219354	0.653539	0.135052	0.877541	0.130171	0.786742	background
Tb927.8.7400	1.02523	0.368032	0.439169	0.291578	1.86987	0.425243	0.459415	0.361263	background
Tb927.10.14140	-1.009	0.180042	-0.533269	0.231369	0.249457	0.773762	-0.122628	0.800869	background
Tb927.3.5190	0.145666	0.864725	-0.0402572	0.931602	0.230595	0.794592	-0.0880768	0.860211	background
Tb927.9.13740	-0.0308625	0.971851	-0.188182	0.628784	-0.110686	0.899392	-0.190047	0.67898	background
Tb927.9.7540	0.786952	0.253457	0.24226	0.562684	0.968443	0.252098	1.05053	0.12171	background
Tb927.10.11150	0.0934643	0.917827	0.034661	0.942626	0.0574231	0.955188	0.0184529	0.977866	background
Tb927.1.3110	-0.166679	0.837633	-0.0248123	0.961373	-0.182365	0.833928	-0.233633	0.621511	background
Tb927.11.2570	-0.197553	0.829779	0.00172938	0.996901	-0.201113	0.815859	0.0954072	0.846725	background
Tb927.10.9700	0.075153	0.941238	0.350021	0.420567	-0.15382	0.880607	0.335208	0.505058	background
Tb11.1220	-0.634707	0.354417	-0.482665	0.339884	-0.540005	0.512881	0.0666958	0.934949	background
Tb927.7.570	0.260507	0.731916	-0.0437967	0.943471	0.261243	0.758086	-0.0840715	0.904961	background
Tb11.v5.0560.1	0.149454	0.858561	-0.13595	0.734431	0.857191	0.303323	-0.156151	0.737297	background
Tb11.v5.0594.1	-0.289351	0.692922	-0.342726	0.422007	-0.21529	0.804212	0.304395	0.531635	background
Tb927.9.1410	0.706424	0.327143	0.298651	0.530493	0.469707	0.571047	-0.34322	0.523975	background
Tb927.11.16230	-0.20892	0.820972	0.270059	0.520398	-0.184151	0.888521	0.266863	0.597237	background
Tb927.2.2580	0.271607	0.725298	0.102249	0.85379	0.293126	0.73539	0.263435	0.669009	background
Tb927.5.2150	-0.281043	0.744013	-0.235757	0.552077	-1.05877	0.232838	-0.313479	0.494096	background
Tb927.11.13360	0.886994	0.218213	0.289265	0.458839	3.33542	0.0187382	0.377685	0.423835	background
Tb927.11.3350	0.762039	0.279734	0.3114	0.538481	0.92941	0.271327	1.48583	0.0721233	background
Tb927.10.1990	-0.755315	0.321732	-0.0232648	0.962654	-0.704397	0.414539	0.191812	0.692506	background
Tb927.9.8610	0.458785	0.503303	0.103951	0.81842	0.44843	0.575706	-0.409913	0.435338	background
Tb927.9.3120	-0.0566754	0.958114	-0.232884	0.565621	0.58208	0.471143	-0.21386	0.641073	background
Tb927.10.6410	0.290578	0.703876	0.191858	0.653049	0.272833	0.758691	0.170075	0.743874	background
Tb927.9.13050	-0.149722	0.872445	-0.129072	0.764359	-0.515927	0.522993	-0.175639	0.705141	background
Tb927.11.6990	-0.272395	0.784481	-0.260508	0.610528	0.133733	0.886228	-0.109264	0.833014	background
Tb927.6.3000	-0.478549	0.490576	-0.123294	0.7688	-0.254289	0.760754	0.117463	0.809646	background
Tb927.10.9040	0.409721	0.552735	-0.0458831	0.938825	0.40798	0.610968	0.276694	0.653836	background
Tb927.4.5010	-0.16961	0.856824	0.306729	0.51247	-0.0916115	0.939263	0.287532	0.606843	background
Tb927.7.1100	0.212396	0.84218	0.408333	0.312569	5.29917	0.00772395	0.423397	0.377985	background
Tb927.1.1910	-0.300032	0.726225	-0.279063	0.542378	0.0540249	0.960052	-0.108571	0.838452	background
Tb927.10.970	0.21464	0.802	0.20989	0.584528	1.75381	0.0795454	0.238049	0.602269	background
Tb927.6.3310	-0.310835	0.689572	-0.277427	0.570324	-0.310763	0.739184	-0.277304	0.681083	background
Tb927.7.6950	-0.362714	0.642248	0.25506	0.595139	-0.0996775	0.911507	-0.0652306	0.901017	background
Tb927.11.16010	0.603296	0.449459	-0.0864624	0.868072	0.579128	0.55158	-0.015218	0.985464	background
Tb927.9.13570	-0.286691	0.775455	-0.385732	0.350636	-0.497503	0.700941	-0.39183	0.428449	background
Tb927.6.2450	0.148134	0.869279	-0.493812	0.29375	0.328436	0.73832	-0.528433	0.352519	background
Tb927.6.2020	0.496274	0.520985	0.10072	0.826266	0.629446	0.477294	0.232477	0.637842	background
Tb927.10.13360	-0.795492	0.233102	-0.130923	0.852092	-0.797198	0.327108	-22.8545	3.71737e-05	background
Tb927.7.7050	0.519337	0.50393	0.235414	0.539878	-1.03072	0.253959	0.17374	0.706588	background
Tb927.11.13000	-0.0442318	0.961364	-0.0307583	0.953734	-0.0466251	0.963626	-0.0339412	0.960156	background
Tb927.7.700	0.268758	0.732248	-0.119385	0.799647	0.177826	0.844324	0.0561602	0.919871	background
Tb927.10.1540	0.0528518	0.957342	-0.0582921	0.898756	-0.0413431	0.965064	-0.0258697	0.965787	background
Tb927.8.6870	-0.495857	0.469471	-0.189105	0.709925	-0.54236	0.490482	-1.67376	0.0334973	background
Tb927.11.8150	1.49524	0.0578919	0.240551	0.589436	1.41593	0.155869	-0.145864	0.844026	background
Tb927.11.6450	-0.0871224	0.926439	-0.399826	0.361812	-0.478811	0.562983	-0.459308	0.362631	background
Tb927.3.4510	0.168695	0.835028	0.131743	0.799523	0.140425	0.872788	-0.261978	0.618061	background
Tb927.5.850	0.071994	0.93878	-0.0606379	0.892318	0.0297286	0.978483	-0.0490753	0.92696	background
Tb11.v5.0326.1	0.482502	0.516934	-0.236531	0.551538	-0.0220683	0.985315	-0.0780011	0.880364	background
Tb927.3.2730	0.602472	0.442317	-0.140308	0.74404	0.23756	0.787904	0.0778483	0.879448	background
Tb927.7.6360	0.124903	0.880222	0.294912	0.50248	0.0398985	0.96704	0.108743	0.837965	background
Tb11.v5.0520.1	0.529515	0.461413	-0.00590203	0.991729	0.538681	0.491856	-0.346862	0.453796	background
Tb927.10.5890	-0.680701	0.43733	0.0401119	0.932295	-0.867318	0.359515	0.118719	0.809646	background
Tb927.8.1100	-0.719495	0.32236	0.202996	0.661719	-0.943071	0.268103	0.772974	0.188543	background
Tb927.10.2470	0.416063	0.59401	-0.256283	0.610528	0.370697	0.703221	-0.191183	0.780204	background
Tb927.8.1280	-0.0682575	0.943602	0.42488	0.312945	-0.7377	0.368283	0.458283	0.350487	background
Tb927.11.2290	0.132935	0.8828	0.150756	0.747243	0.305595	0.716426	0.238521	0.618061	background
Tb927.11.830	-0.00410321	0.996667	0.169178	0.691187	-0.261924	0.759394	0.171385	0.71419	background
Tb927.6.990	-0.416817	0.629184	-0.170372	0.693146	-0.133253	0.905491	-0.0906248	0.863428	background
Tb927.8.1640	-0.483752	0.497926	-0.127789	0.756103	-1.05993	0.216778	-0.228663	0.617647	background
Tb927.6.2350	-1.20295	0.115666	0.191848	0.624329	-0.346493	0.671307	-0.0691879	0.89168	background
Tb927.6.2290	-0.121957	0.887617	0.0628177	0.886953	-0.150834	0.870593	0.0690317	0.892888	background
Tb927.3.3090	-1.80616	0.0471278	0.0958359	0.8558	-1.8674	0.106846	0.546789	0.627232	translation
Tb05.5K5.30	1.5154	0.0775838	0.865903	0.126126	0.73842	0.684713	0.46825	0.443012	abundance
Tb927.9.5460	0.113781	0.908203	0.23067	0.583766	0.0324066	0.982009	0.220673	0.665879	background
Tb927.11.8040	0.535592	0.482656	-0.511749	0.250163	-0.256155	0.789525	-0.35223	0.476974	background
Tb927.10.14270	3.27906	0.00536381	1.05157	0.101994	2.84481	0.0391568	-0.913741	0.384759	translation
Tb927.10.10550	-0.196777	0.805318	0.304499	0.506672	-0.0875496	0.927341	0.121781	0.831887	background
Tb927.11.10820	0.13172	0.87862	0.17458	0.707545	0.106786	0.910369	0.15017	0.797924	background
Tb927.1.2110	0.447605	0.717165	-0.245388	0.525738	-7.09597	0.00762459	-0.238476	0.601538	background
Tb927.10.14530	0.257306	0.754708	0.103786	0.818977	0.205327	0.832101	0.069055	0.900672	background
Tb927.11.1700	-0.0223124	0.979498	0.482655	0.251852	-1.25939	0.158286	0.491065	0.318162	background
Tb927.6.4520	-0.117241	0.887617	0.16799	0.771712	-0.123985	0.887523	0.417903	0.539758	background
Tb927.11.7340	-0.0536191	0.956185	0.00492349	0.993173	-0.0531553	0.956539	-0.0109416	0.987544	background
Tb927.9.11940	0.7353	0.333625	0.285048	0.559295	0.670658	0.497629	0.165514	0.823849	background
Tb927.5.940	-0.064982	0.947464	0.0822454	0.850181	0.226832	0.797786	0.067845	0.892888	background
Tb927.10.14510	0.400981	0.695139	0.0362225	0.948318	0.344298	0.766053	-0.0478327	0.93762	background
Tb927.5.3900	0.364401	0.611472	0.533698	0.30074	0.271523	0.756311	0.195626	0.744241	background
Tb927.9.4350	0.569383	0.431403	0.38052	0.364339	0.823082	0.340396	0.542256	0.314925	background
Tb927.6.4540	-0.541544	0.441656	-0.137138	0.740871	-0.676107	0.414539	-0.333187	0.486982	background
Tb927.8.7260	0.380707	0.585538	0.0281662	0.953734	0.353432	0.662561	-0.261748	0.574239	background
Tb927.8.7580	0.420329	0.594361	0.493802	0.262355	0.474792	0.68738	0.50136	0.349725	background
Tb927.11.6160	-0.313983	0.672823	-0.0714171	0.869504	-0.408272	0.616913	-0.170424	0.719264	background
Tb927.9.6830	1.03235	0.230788	0.0613078	0.917079	0.975901	0.349662	-0.223524	0.722338	background
Tb927.11.4740	0.601144	0.375239	-0.177332	0.673669	0.662145	0.410655	-1.90647	0.0192574	background
Tb927.10.13790	1.25237	0.114628	0.538555	0.244092	1.02096	0.330321	0.40224	0.594806	background
[truncated: 5,783 more rows]

## Sheet: Diff TE
Table S2. Transcripts whose TE is affected by DRBD18 knockdown
[truncated: 103 more rows]
