# Supplementary material
Source: HighWire-hosted journal article supplement (doi:10.1101/rna.079625.123)
Supplement: Supplemental_Table_3.xlsx [file Supplemental_Table_3.xlsx]

## Sheet: Table S4
Table S3. Changes in the proteome in doxycycline-induced PF DRBD18 knockdown cells. Dysregulated proteins are defined as those with p-value <0.05 and fold change >50% (i.e., protein ratio >1.5 or <0.67).
ProteinAC	Protein name	Peptide #	State	Ratio_DOX/Ctrl	p-val_DOX/Ctrl	Log2 protein MS intensities						Untransformed protein MS intensities
						R1	R2	R3	R1DOX	R2DOX	R3DOX	R1	R2	R3	R1DOX	R2DOX	R3DOX
Tb927.1.1400	Overproducer of inositol protein 10 homolog, putative	4	Up-regulated	1.58616	0.00346569	25.244	25.0579	25.2686	26.0063	25.8391	25.7159	3.97366e+07	3.49282e+07	4.04199e+07	6.74003e+07	6.00285e+07	5.51145e+07			TE UP 23
Tb927.1.4280	hypothetical protein, conserved	9	Up-regulated	2.41121	0.000157325	24.2958	24.0743	24.2989	25.5764	25.3931	25.5141	2.05952e+07	1.7664e+07	2.06387e+07	5.00323e+07	4.40634e+07	4.79196e+07			TE DOWN 28
Tb927.1.670	conserved protein, unknown function	9	Up-regulated	1.60444	0.0203181	25.7052	25.5116	25.2914	26.4338	26.1492	25.9615	5.47058e+07	4.78378e+07	4.10649e+07	9.06492e+07	7.44181e+07	6.53436e+07
Tb927.10.10050	hypothetical protein, conserved	2	Up-regulated	2.25778	0.00944396	22.7593	22.7281	22.0032	23.6893	23.8482	23.5845	7.09964e+06	6.94787e+06	4.20374e+06	1.35267e+07	1.51015e+07	1.25791e+07
Tb927.10.1050	serine peptidase, Clan SC, Family S10	2	Up-regulated	1.52819	0.0009642	28.2605	28.4124	28.4535	29.0473	28.9145	29.004	3.21556e+08	3.57262e+08	3.67588e+08	5.54776e+08	5.05979e+08	5.38352e+08
Tb927.10.11340	hypothetical protein, conserved	12	Up-regulated	1.65174	0.00431683	25.669	25.6022	25.7414	26.6029	26.3509	26.2058	5.33497e+07	5.0937e+07	5.60957e+07	1.01925e+08	8.55888e+07	7.73966e+07
Tb927.10.12270	methyltransferase domain containing protein, putative	2	Up-regulated	1.63564	0.000392845	24.3982	24.2513	24.3467	25.1042	25.074	24.9466	2.21107e+07	1.99691e+07	2.13349e+07	3.60687e+07	3.53194e+07	3.23353e+07
Tb927.10.13570	RBP27	2	Up-regulated	1.82351	0.0270499	23.8307	24.1934	23.61	25.054	24.7632	24.4057	1.4919e+07	1.91838e+07	1.28033e+07	3.48342e+07	2.84752e+07	2.22247e+07
Tb927.10.13620	nadh-ubiquinone oxidoreductase 39 kda subunit	4	Up-regulated	1.52433	0.0348533	24.4086	24.4568	24.2817	25.2622	25.0065	24.6424	2.22706e+07	2.30267e+07	2.03949e+07	4.02427e+07	3.37059e+07	2.61879e+07
Tb927.10.13780	Glycogen synthase kinase 3 short	19	Up-regulated	1.87188	0.00182591	30.1902	30.3069	30.3471	31.4033	31.0547	31.0772	1.22504e+09	1.32827e+09	1.36578e+09	2.84005e+09	2.23043e+09	2.26559e+09
Tb927.10.13790	hypothetical protein, conserved	17	Up-regulated	1.71338	0.00131622	27.5234	27.5491	27.5624	28.5028	28.1899	28.2537	1.92917e+08	1.96383e+08	1.98199e+08	3.80375e+08	3.06195e+08	3.20039e+08
Tb927.10.14270	TFIIF-stimulated CTD phosphatase, putative	3	Up-regulated	1.66124	0.0119304	24.1405	24.3527	24.6826	25.1184	25.0369	25.2605	1.84934e+07	2.1423e+07	2.69274e+07	3.64245e+07	3.44232e+07	4.01957e+07
Tb927.10.15960	hypothetical protein, conserved	4	Up-regulated	1.93688	0.00485966	24.2334	24.1265	24.0217	25.3693	24.9715	24.8587	1.9723e+07	1.83153e+07	1.70318e+07	4.33433e+07	3.28977e+07	3.04234e+07
Tb927.10.1900	DNA topoisomerase IA, putative	13	Up-regulated	1.51193	0.0164858	27.4463	27.3805	27.5857	28.3183	27.8708	27.9819	1.82881e+08	1.74726e+08	2.0143e+08	3.34698e+08	2.45436e+08	2.65094e+08
Tb927.10.2430	receptor-type adenylate cyclase GRESAG 4, putative	8	Up-regulated	1.75843	0.00427997	26.697	26.5017	26.3276	27.476	27.1638	27.3362	1.08791e+08	9.50174e+07	8.42169e+07	1.86678e+08	1.50351e+08	1.69443e+08
Tb927.10.3090	hypothetical protein, conserved	3	Up-regulated	1.95499	0.0317359	21.404	22.2501	21.7851	23.1545	22.5645	22.6762	2.77485e+06	4.98835e+06	3.61382e+06	9.33693e+06	6.20286e+06	6.70213e+06
Tb927.10.3230	CMGC/MAPK protein kinase, putative	4	Up-regulated	3.31972	0.00313836	23.7597	23.9374	23.3695	25.8232	25.2661	25.1308	1.42034e+07	1.60652e+07	1.08376e+07	5.93698e+07	4.03521e+07	3.67393e+07
Tb927.10.4430	pumillo RNA binding protein PUF1	10	Up-regulated	1.56344	0.00162877	27.5866	27.8058	27.7545	28.3816	28.2598	28.4427	2.01561e+08	2.34621e+08	2.26432e+08	3.49709e+08	3.21406e+08	3.6484e+08
Tb927.10.480	hypothetical protein, conserved	2	Up-regulated	2.513	0.0271076	21.4581	21.0418	21.1687	21.8562	22.528	23.0599	2.88087e+06	2.15878e+06	2.35731e+06	3.79636e+06	6.04787e+06	8.74438e+06
Tb927.10.4990	cdc2-related kinase 3	2	Up-regulated	1.50432	0.0189876	24.3022	24.1724	24.2279	25.0327	24.5338	24.8625	2.06865e+07	1.89067e+07	1.96488e+07	3.43248e+07	2.42897e+07	3.05045e+07
Tb927.10.5020	Eukaryotic translation initiation factor 4E type 5	7	Up-regulated	1.65286	0.0213343	28.2661	28.4754	28.0859	29.2786	28.9686	28.7286	3.22802e+08	3.73205e+08	2.84911e+08	6.51231e+08	5.25296e+08	4.44796e+08
Tb927.10.5250	ZC3H32	6	Up-regulated	5.59792	0.000162376	22.7112	22.2758	22.2443	25.1057	24.7872	24.82	6.86667e+06	5.07773e+06	4.96825e+06	3.61041e+07	2.89524e+07	2.96192e+07
Tb927.10.5270	mitogen-activated protein kinase kinase 5	2	Up-regulated	2.88576	0.0147027	23.252	22.8913	23.2007	25.2393	24.2669	24.2025	9.98997e+06	7.78e+06	9.64054e+06	3.96073e+07	2.01871e+07	1.93058e+07
Tb927.10.6240	ras-like small GTPase, putative	4	Up-regulated	1.51189	0.0049806	24.0038	23.9979	23.9976	24.619	24.3932	24.7533	1.68209e+07	1.67522e+07	1.67489e+07	2.57668e+07	2.20342e+07	2.82807e+07
Tb927.10.650	Component of motile flagella 17	2	Up-regulated	1.59591	0.0278853	25.4641	25.3415	25.178	26.3365	25.8217	25.796	4.62866e+07	4.2516e+07	3.79614e+07	8.47368e+07	5.93073e+07	5.826e+07
Tb927.10.6840	hypothetical protein, conserved	3	Up-regulated	1.56048	0.00604022	25.6421	25.7474	25.863	26.5902	26.3085	26.2663	5.23647e+07	5.63283e+07	6.10293e+07	1.01028e+08	8.31094e+07	8.07109e+07
Tb927.10.7090	Alternative oxidase, mitochondrial	6	Up-regulated	2.04275	0.000102002	28.3747	28.4918	28.493	29.5467	29.3759	29.5258	3.48051e+08	3.77476e+08	3.77791e+08	7.84214e+08	6.96663e+08	7.72927e+08
Tb927.10.7140	membrane-bound acid phosphatase 2	2	Up-regulated	1.73236	0.00224875	24.3376	24.2441	24.152	24.9837	24.8889	25.2243	2.12006e+07	1.98704e+07	1.86419e+07	3.3178e+07	3.10667e+07	3.91992e+07
Tb927.10.7520	folylpolyglutamate synthase, putative	3	Up-regulated	1.94948	0.0458585	21.9741	21.9128	21.7276	23.3798	22.4907	22.4399	4.11977e+06	3.94829e+06	3.47252e+06	1.09148e+07	5.89369e+06	5.68965e+06
Tb927.10.9360	L-2-hydroxyglutarate dehydrogenase, mitochondrial, putative	6	Up-regulated	2.04998	0.00118208	26.0634	26.4332	26.2373	27.4193	27.2248	27.2108	7.01237e+07	9.06094e+07	7.91063e+07	1.79485e+08	1.56847e+08	1.55334e+08
Tb927.11.1000	kinetoplastid kinetochore protein 16	2	Up-regulated	1.8536	0.0165966	20.8887	20.491	20.7154	21.926	21.5087	21.284	1.9415e+06	1.47366e+06	1.72167e+06	3.98446e+06	2.98366e+06	2.55349e+06
Tb927.11.10470	hypothetical protein, conserved	3	Up-regulated	7.23412	0.00017164	21.4237	21.1323	21.6954	24.3115	24.0295	24.4923	2.81298e+06	2.29855e+06	3.39588e+06	2.08202e+07	1.71237e+07	2.35997e+07
Tb927.11.10660	Basal body protein	28	Up-regulated	1.53897	0.0159125	29.1304	29.1939	29.1613	30.0565	29.6949	29.5531	5.87643e+08	6.141e+08	6.00394e+08	1.1166e+09	8.69084e+08	7.87741e+08
Tb927.11.10700	glucosidase II beta subunit-like protein, putative	4	Up-regulated	1.73474	0.00753809	24.1821	24.2468	23.8443	25.0886	24.8024	24.7765	1.90343e+07	1.99071e+07	1.50609e+07	3.56807e+07	2.92594e+07	2.87394e+07
Tb927.11.10940	hypothetical protein, conserved	2	Up-regulated	4.30614	0.0142534	19.2849	19.5747	19.9581	22.3562	21.64	20.8286	638765	780862	1.01859e+06	5.36908e+06	3.26801e+06	1.86225e+06
Tb927.11.11580	hypothetical protein, conserved	2	Up-regulated	1.93359	0.0388083	20.4926	19.7901	20.2813	20.9674	21.5855	20.8364	1.47532e+06	906587	1.2743e+06	2.05029e+06	3.14698e+06	1.87236e+06
Tb927.11.12350	DNA photolyase, putative	4	Up-regulated	1.58219	0.0127815	23.3968	23.3914	23.0101	24.0892	23.9294	23.7822	1.10446e+07	1.10031e+07	8.4478e+06	1.78477e+07	1.59762e+07	1.44259e+07
Tb927.11.13940	ubiquitin-conjugating enzyme E2, putative	2	Up-regulated	3.692	0.000476171	22.7353	23.0894	23.2116	24.8327	24.7526	25.1192	6.98253e+06	8.92461e+06	9.71349e+06	2.98804e+07	2.82671e+07	3.64439e+07
Tb927.11.13980	Outer row dynein-assembly protein 7	4	Up-regulated	2.2943	0.0134734	22.7689	22.7496	22.6794	24.4171	23.6374	23.5796	7.14688e+06	7.0519e+06	6.71687e+06	2.24015e+07	1.30489e+07	1.25364e+07
Tb927.11.14470	Bardet-Biedl syndrome 9 protein	5	Up-regulated	1.50572	0.0164016	24.575	24.1026	24.3717	25.0555	24.9597	24.8357	2.49935e+07	1.80141e+07	2.17074e+07	3.48693e+07	3.26308e+07	2.99425e+07
Tb927.11.15240	Ras-related protein RAB2B, putative	6	Up-regulated	1.98009	0.00884105	26.0794	25.8145	25.8981	27.2672	26.6821	26.7372	7.09065e+07	5.90103e+07	6.25312e+07	1.61529e+08	1.07672e+08	1.11863e+08
Tb927.11.1610	Exocyst complex component Sec6, putative	2	Up-regulated	2.13061	0.0485505	21.0994	21.2581	21.1621	22.8537	22.0165	21.6573	2.24667e+06	2.50796e+06	2.34648e+06	7.57958e+06	4.24257e+06	3.30752e+06
Tb927.11.16150	tubulin binding cofactor A, putative	5	Up-regulated	1.76485	0.00134283	28.2577	28.1742	28.1298	29.1832	28.9587	28.8624	3.20928e+08	3.02881e+08	2.93711e+08	6.09546e+08	5.21703e+08	4.88033e+08
Tb927.11.16170	hypothetical protein, conserved	2	Up-regulated	2.22937	0.000104319	23.223	23.2067	23.0306	24.3647	24.3439	24.2256	9.79088e+06	9.68096e+06	8.56854e+06	2.16019e+07	2.12935e+07	1.9617e+07
Tb927.11.16770	glucosamine-6-phosphate isomerase, putative	11	Up-regulated	1.58152	0.000480967	27.9056	28.0593	27.9639	28.7247	28.5743	28.6136	2.51433e+08	2.79694e+08	2.61798e+08	4.43613e+08	3.99685e+08	4.10729e+08
Tb927.11.2100	Divergent AAA domain containing protein, putative	5	Up-regulated	1.52902	0.0167964	24.2857	24.135	24.0444	25.0287	24.616	24.6293	2.04514e+07	1.84231e+07	1.73011e+07	3.42285e+07	2.57139e+07	2.5951e+07
Tb927.11.2660	Golgi reassembly stacking protein (GRASP homologue), putative	5	Up-regulated	1.83664	0.0108951	25.0332	24.6265	24.8033	25.9971	25.5136	25.5618	3.43364e+07	2.59014e+07	2.92777e+07	6.6975e+07	4.79032e+07	4.95297e+07
Tb927.11.3110	hypothetical protein, conserved	2	Up-regulated	2.32061	0.0144822	21.43	21.6627	21.1614	23.0373	22.5982	22.1782	2.82533e+06	3.31993e+06	2.34534e+06	8.60834e+06	6.34934e+06	4.7457e+06
Tb927.11.3440	hypothetical protein, conserved	5	Up-regulated	2.28491	0.00229885	24.201	24.716	24.3254	25.7713	25.5038	25.5817	1.92847e+07	2.75592e+07	2.10221e+07	5.72713e+07	4.75797e+07	5.02169e+07
Tb927.11.4180	PSP1 C-terminal conserved region, putative	5	Up-regulated	1.78513	0.000566604	24.9863	25.1837	25.0965	26.0317	25.9224	25.8195	3.32376e+07	3.81108e+07	3.58764e+07	6.85988e+07	6.35935e+07	5.9218e+07
Tb927.11.4210	U-box domain containing protein, putative	18	Up-regulated	1.59018	0.000462138	29.1472	29.1943	29.2189	29.9518	29.7453	29.8645	5.94557e+08	6.14291e+08	6.24825e+08	1.03843e+09	8.99971e+08	9.77458e+08
Tb927.11.4470	ULK family serine/threonine-protein kinase, putative	7	Up-regulated	1.67446	0.0129584	24.8976	24.6504	24.7003	25.7872	25.3132	25.3405	3.12564e+07	2.63342e+07	2.72607e+07	5.79044e+07	4.16889e+07	4.24871e+07
Tb927.11.4610	protein kinase A regulatory subunit	20	Up-regulated	1.71743	0.00833394	29.4517	29.4385	29.4465	30.519	30.0936	30.012	7.34232e+08	7.27565e+08	7.31635e+08	1.53863e+09	1.14569e+09	1.08274e+09
Tb927.11.490	hypothetical protein, conserved	2	Up-regulated	20.7318	0.00887725	16.8799	20.255	19.4346	24.0521	23.4948	23.7305	120602	1.25132e+06	708576	1.73938e+07	1.18203e+07	1.39183e+07
Tb927.11.5810	Surfeit locus protein 6, putative	2	Up-regulated	1.59653	0.00959379	24.7265	25.0313	25.0793	25.7571	25.6706	25.4407	2.77608e+07	3.42902e+07	3.54502e+07	5.67116e+07	5.34105e+07	4.55413e+07
Tb927.11.6390	START domain containing protein, putative	6	Up-regulated	2.24553	0.000986018	26.9475	27.3035	27.3384	28.396	28.2689	28.4511	1.29424e+08	1.65638e+08	1.69703e+08	3.53233e+08	3.23444e+08	3.66965e+08
Tb927.11.6410	regulator of nonsense transcripts 2	3	Up-regulated	2.23518	0.026741	23.117	22.1541	22.5559	24.2011	23.5549	23.6249	9.09698e+06	4.66704e+06	6.16583e+06	1.92869e+07	1.23236e+07	1.29364e+07
Tb927.11.7160	cdc2-related kinase 8, putative	4	Up-regulated	1.67258	0.0361958	24.8123	24.5969	24.4734	25.7568	25.0752	25.2031	2.94606e+07	2.53744e+07	2.3293e+07	5.6697e+07	3.53502e+07	3.8628e+07
Tb927.11.7390	NADH-ubiquinone oxidoreductase complex I, 21 kDa subunit, putative	2	Up-regulated	2.07006	0.0417596	23.2649	22.6826	23.0172	24.5706	23.8211	23.5911	1.00793e+07	6.73183e+06	8.48924e+06	2.49158e+07	1.48208e+07	1.26367e+07
Tb927.11.7710.1-p1	Gp63-1 surface protease homolog, putative	2	Up-regulated	23.223	0.000118417	19.8494	18.9251	19.8272	24.0503	24.2218	24.1145	944661	497770	930227	1.73719e+07	1.95649e+07	1.81636e+07
Tb927.11.8190	DNA repair protein RAD51	5	Up-regulated	1.54384	0.0102142	25.8966	25.8866	25.7916	26.7259	26.403	26.2916	6.24659e+07	6.20342e+07	5.80814e+07	1.10997e+08	8.87371e+07	8.21432e+07
Tb927.11.8210	RAD50 DNA repair-like protein	22	Up-regulated	1.52049	0.00354772	28.517	28.6026	28.7221	29.3616	29.0947	29.1937	3.84133e+08	4.07599e+08	4.42811e+08	6.8982e+08	5.73284e+08	6.14008e+08
Tb927.11.8310	class I transcription factor A, subunit 4	5	Up-regulated	1.64935	0.000451886	27.3458	27.2582	27.2433	28.1192	27.9191	27.9693	1.70576e+08	1.60526e+08	1.58871e+08	2.91548e+08	2.538e+08	2.62788e+08
Tb927.11.8430	hypothetical protein, conserved	3	Up-regulated	1.76993	0.0284083	25.4777	26.251	26.2117	26.7675	26.8154	26.9458	4.67244e+07	7.98631e+07	7.77164e+07	1.1424e+08	1.18095e+08	1.29268e+08
Tb927.2.2120	Serine/threonine-protein kinase NEK22, putative	10	Up-regulated	1.70919	0.00406755	26.6602	26.6218	26.247	27.3066	27.2676	27.3094	1.06054e+08	1.03263e+08	7.96415e+07	1.65998e+08	1.61567e+08	1.66322e+08
Tb927.2.2460	ubiquitin-conjugating enzyme E2, putative	3	Up-regulated	1.57761	0.0247612	26.6177	26.7063	26.5884	27.6186	27.0256	27.1766	1.0297e+08	1.09499e+08	1.00906e+08	2.06076e+08	1.36617e+08	1.51694e+08
Tb927.2.3720	ubiquitin-conjugating enzyme, putative	5	Up-regulated	1.80878	0.0017104	25.2954	25.5212	25.5773	26.4189	26.1725	26.3711	4.11802e+07	4.81563e+07	5.00637e+07	8.97188e+07	7.56306e+07	8.67942e+07
Tb927.2.4420.2	MIZ/SP-RING zinc finger, putative	2	Up-regulated	1.53798	0.0197474	23.2742	23.125	23.5557	24.1408	23.7709	23.9155	1.01448e+07	9.14768e+06	1.23302e+07	1.84978e+07	1.43139e+07	1.58231e+07
Tb927.2.4445	hypothetical protein, conserved	2	Up-regulated	12.9465	0.0229666	18.8103	19.5505	19.1643	24.016	22.0467	21.0707	459679	767872	587542	1.69643e+07	4.33232e+06	2.20245e+06
Tb927.2.4510	cdc2-related kinase 9	4	Up-regulated	1.69396	0.00715729	24.008	24.1753	23.9885	25.0402	24.8118	24.5701	1.68702e+07	1.89454e+07	1.66437e+07	3.45037e+07	2.94517e+07	2.49087e+07
Tb927.2.4870	kinetoplastid-specific dual specificity phosphatase, putative	3	Up-regulated	1.51478	0.0293861	24.5019	24.0852	24.5774	25.1675	24.8194	25.0009	2.37572e+07	1.77976e+07	2.5034e+07	3.76844e+07	2.96072e+07	3.35756e+07
Tb927.2.5070	hypothetical protein, conserved	2	Up-regulated	3.12953	0.0445319	20.6968	19.8557	19.6669	20.8097	21.8428	22.3359	1.69969e+06	948758	832407	1.83803e+06	3.76136e+06	5.29405e+06
Tb927.2.5440	hypothetical protein, conserved	4	Up-regulated	1.80081	0.0110862	23.3192	23.5906	22.9348	24.0681	24.1828	24.2097	1.04659e+07	1.26318e+07	8.0177e+06	1.75881e+07	1.90429e+07	1.94019e+07
Tb927.2.5870	hypothetical protein, conserved	3	Up-regulated	2.10991	0.0266547	21.0069	21.6314	21.2296	22.3478	22.7784	21.9157	2.10722e+06	3.24862e+06	2.45892e+06	5.33779e+06	7.19441e+06	3.95622e+06
Tb927.3.1130	DNA polymerase delta subunit 2, putative	5	Up-regulated	1.92231	0.0123476	23.5801	23.1667	23.3544	24.6326	24.2361	24.0234	1.25409e+07	9.41585e+06	1.07244e+07	2.60112e+07	1.97607e+07	1.70512e+07
Tb927.3.2475	hypothetical protein	4	Up-regulated	1.59646	0.00697324	28.0891	27.9903	27.8086	28.8147	28.6319	28.4579	2.85536e+08	2.66631e+08	2.35089e+08	4.72147e+08	4.15979e+08	3.68696e+08
Tb927.3.2700	hypothetical protein, conserved	3	Up-regulated	1.84444	0.0429088	22.6774	22.2215	22.1776	23.6724	23.1534	22.8275	6.70795e+06	4.89047e+06	4.74366e+06	1.33691e+07	9.32982e+06	7.44306e+06
Tb927.3.2930	RNA-binding protein RBP6, putative	3	Up-regulated	9.84699	0.000562441	20.1906	20.0799	21.1328	23.7754	23.8191	23.9478	1.19669e+06	1.1083e+06	2.2994e+06	1.43588e+07	1.48e+07	1.61806e+07
Tb927.3.3040	Right handed beta helix region, putative	3	Up-regulated	1.5886	0.0401145	25.5651	25.4451	25.3162	26.4597	26.028	25.7665	4.96443e+07	4.56806e+07	4.17768e+07	9.22938e+07	6.84252e+07	5.70806e+07
Tb927.3.3060	hypothetical protein, conserved	5	Up-regulated	2.80039	1.47788e-05	24.8641	24.8543	24.8856	26.4663	26.3094	26.2782	3.05375e+07	3.03315e+07	3.09955e+07	9.2713e+07	8.31619e+07	8.13811e+07
Tb927.3.4470	hypothetical protein, conserved	2	Up-regulated	1.61283	0.0129423	22.1552	22.1234	21.6657	22.6445	22.6336	22.7803	4.67059e+06	4.56894e+06	3.32686e+06	6.5567e+06	6.50732e+06	7.20342e+06
Tb927.3.4640	VIT family, putative	2	Up-regulated	1.55066	0.00360498	25.003	25.1475	25.1593	25.8758	25.5675	25.7536	3.3624e+07	3.71654e+07	3.74714e+07	6.15749e+07	4.97278e+07	5.65732e+07
Tb927.4.1150	hypothetical protein, conserved	4	Up-regulated	1.9322	0.0161883	24.6455	24.6507	24.5292	25.9581	25.4108	25.2016	2.62437e+07	2.63394e+07	2.42122e+07	6.51899e+07	4.46071e+07	3.85871e+07
Tb927.4.1390	hypothetical protein, conserved	2	Up-regulated	2.49213	0.000628681	22.2308	22.6052	22.5872	23.8188	23.6849	23.894	4.92204e+06	6.3805e+06	6.30105e+06	1.47968e+07	1.34854e+07	1.55883e+07
Tb927.4.1810	mitochondrial ribosomal protein L33	2	Up-regulated	1.9621	0.00756195	21.5489	22.1692	21.7551	22.9435	22.6708	22.8337	3.06817e+06	4.71631e+06	3.53956e+06	8.06638e+06	6.67699e+06	7.47552e+06
Tb927.4.2540	Neural precursor cell-expressed, developmently downregulated 8	2	Up-regulated	1.60317	0.00456148	25.9137	26.0838	26.0106	26.8882	26.5992	26.5442	6.32101e+07	7.11205e+07	6.76017e+07	1.24208e+08	1.01665e+08	9.78599e+07
Tb927.4.3320	uracil phosphoribosyltransferase, putative	7	Up-regulated	1.67786	0.0368854	29.7855	29.4044	29.5364	30.7018	30.1868	30.0122	9.25402e+08	7.1059e+08	7.78636e+08	1.74644e+09	1.22214e+09	1.08284e+09
Tb927.4.3400	hypothetical protein, conserved	4	Up-regulated	2.90976	2.5053e-05	23.3635	23.3619	23.2217	24.9343	24.7585	24.876	1.0792e+07	1.07804e+07	9.78215e+06	3.20616e+07	2.83819e+07	3.07906e+07
Tb927.4.520	hypothetical protein, conserved	2	Up-regulated	2.3853	0.0103673	21.9051	21.7088	21.2702	23.2192	22.89	22.5259	3.9273e+06	3.42757e+06	2.5292e+06	9.76478e+06	7.77254e+06	6.03911e+06
Tb927.4.5310	Repressor of differentiation kinase 2	3	Up-regulated	2.46875	0.0142406	22.1041	22.4584	21.371	23.4838	23.332	23.2189	4.50811e+06	5.76318e+06	2.71213e+06	1.1731e+07	1.05591e+07	9.76273e+06
Tb927.4.960	WD domain, G-beta repeat, putative	2	Up-regulated	1.83076	0.00844508	20.1451	20.593	20.7187	21.3046	21.3271	21.4954	1.15949e+06	1.58162e+06	1.72559e+06	2.59009e+06	2.6309e+06	2.95645e+06
Tb927.5.1120	Phage tail fibre repeat, putative	10	Up-regulated	1.68474	0.000539395	26.6512	26.7727	26.86	27.5843	27.4347	27.5261	1.0539e+08	1.14651e+08	1.21805e+08	2.0123e+08	1.81412e+08	1.93278e+08
Tb927.5.2090	kinesin, putative	14	Up-regulated	1.64973	0.00227154	26.5777	26.8166	26.5433	27.4798	27.2748	27.358	1.00155e+08	1.18198e+08	9.78002e+07	1.87172e+08	1.62376e+08	1.72019e+08
Tb927.5.2620	hypothetical protein, conserved	8	Up-regulated	1.82809	0.000164681	27.3448	27.4887	27.4868	28.3018	28.2428	28.3877	1.7045e+08	1.88334e+08	1.88089e+08	3.30884e+08	3.17647e+08	3.51201e+08
Tb927.5.309b	invariant surface glycoprotein, putative	3	Up-regulated	1.92917	0.00241107	23.9098	24.1553	24.1703	25.2282	24.9868	24.8536	1.57604e+07	1.86838e+07	1.88796e+07	3.93054e+07	3.32495e+07	3.03161e+07
Tb927.5.3430	ubiquitin-activating enzyme E1, putative	3	Up-regulated	1.67132	0.0100701	24.7155	24.2275	24.4333	25.3599	25.1875	25.0798	2.75498e+07	1.96426e+07	2.26538e+07	4.30606e+07	3.82118e+07	3.54628e+07
Tb927.5.3600.2	ATP-dependent DEAD/H RNA helicase, putative	2	Up-regulated	1.73473	0.00139696	23.3679	23.6748	23.6335	24.3998	24.2952	24.3821	1.08253e+07	1.33917e+07	1.30136e+07	2.21344e+07	2.05861e+07	2.18646e+07
Tb927.5.4380	Kinetoplastid-specific Protein Phosphatase 1	24	Up-regulated	1.59026	0.00208877	30.0396	30.1562	30.1362	30.9437	30.6556	30.7274	1.10364e+09	1.19656e+09	1.18007e+09	2.06531e+09	1.69145e+09	1.77778e+09
Tb927.5.770	hypothetical protein, conserved	5	Up-regulated	1.68874	0.045495	21.804	22.0455	22.0335	23.1559	22.4469	22.4373	3.66161e+06	4.32868e+06	4.29287e+06	9.3462e+06	5.71737e+06	5.6795e+06
Tb927.6.1480	hypothetical protein, conserved	4	Up-regulated	2.63835	0.0208066	21.8755	21.2456	20.6347	23.0518	22.6078	22.4969	3.84739e+06	2.48641e+06	1.62804e+06	8.69555e+06	6.39184e+06	5.91875e+06
Tb927.6.1620	Zn-finger in Ran binding protein and others, putative	2	Up-regulated	1.92123	0.00544205	22.1982	21.9398	21.9038	23.2171	22.8978	22.7279	4.81204e+06	4.023e+06	3.9238e+06	9.75092e+06	7.8149e+06	6.94689e+06
Tb927.7.1090	DNA repair protein RAD5, putative	17	Up-regulated	2.29814	0.00191022	26.2118	26.6023	26.4024	27.8246	27.4087	27.5806	7.77197e+07	1.01882e+08	8.86954e+07	2.37697e+08	1.78169e+08	2.00719e+08
Tb927.7.1190	regulator of chromosome condensation, putative	4	Up-regulated	1.64421	0.00172237	24.2796	24.2657	24.3927	25.1269	24.8535	25.098	2.03658e+07	2.01697e+07	2.20259e+07	3.6639e+07	3.03137e+07	3.59117e+07
Tb927.7.1810	hypothetical protein, conserved	2	Up-regulated	8.70514	0.000288895	21.1791	20.5415	21.0624	24.2765	23.7066	24.18	2.37441e+06	1.52613e+06	2.18983e+06	2.03219e+07	1.36896e+07	1.90061e+07
Tb927.7.3000	kinesin, putative	5	Up-regulated	1.65221	0.0149625	25.1742	25.5917	25.7007	26.2518	26.0728	26.353	3.78604e+07	5.05657e+07	5.45357e+07	7.99083e+07	7.05809e+07	8.57141e+07
Tb927.7.310	Prostaglandin E synthase, putative	3	Up-regulated	2.07954	0.0132465	25.1415	25.8494	25.7042	26.4532	26.5696	26.8963	3.70128e+07	6.04559e+07	5.46697e+07	9.18752e+07	9.95966e+07	1.24907e+08
Tb927.7.3150	CRAL/TRIO domain containing protein, putative	2	Up-regulated	2.15969	0.00160687	23.1628	23.2507	23.1535	24.4815	24.0128	24.3669	9.39068e+06	9.98066e+06	9.33039e+06	2.34249e+07	1.69262e+07	2.16356e+07
Tb927.7.3580	Serine/threonine-protein kinase NEK11, putative	2	Up-regulated	1.72433	0.0315162	22.0843	22.6702	22.329	22.8476	23.1479	23.445	4.44681e+06	6.67427e+06	5.26866e+06	7.54751e+06	9.29393e+06	1.14199e+07
Tb927.7.4360	hypothetical protein, conserved	3	Up-regulated	1.52132	0.00479023	24.7336	24.9312	25.0359	25.6237	25.4185	25.483	2.78968e+07	3.19918e+07	3.44009e+07	5.17016e+07	4.4847e+07	4.68962e+07
Tb927.7.4730	pumilio/PUF RNA binding protein 5	2	Up-regulated	22.0973	0.000115308	20.0657	19.5891	20.5936	24.6797	24.4385	24.6882	1.09744e+06	788698	1.58234e+06	2.68746e+07	2.27363e+07	2.7033e+07
Tb927.7.5240	Flagellum attachment zone protein 21	5	Up-regulated	1.83792	0.0165912	25.6688	25.0346	25.0094	26.2301	25.9929	26.213	5.33445e+07	3.43679e+07	3.37726e+07	7.87128e+07	6.67787e+07	7.77882e+07
Tb927.7.5340	cAMP response protein 3	14	Up-regulated	1.912	0.000602726	28.8682	29.1024	29.0587	30.0517	29.8352	29.9502	4.90001e+08	5.76371e+08	5.5918e+08	1.11294e+09	9.57845e+08	1.03727e+09
Tb927.7.6310	polo-like protein kinase	3	Up-regulated	1.95406	0.000917542	24.2693	24.3372	24.3627	25.4114	25.0738	25.3626	2.02206e+07	2.11947e+07	2.15721e+07	4.46257e+07	3.5315e+07	4.31408e+07
Tb927.7.6480	hypothetical protein, conserved	4	Up-regulated	1.61154	0.0122223	26.6208	26.4544	26.0926	27.1449	27.128	27.0055	1.03195e+08	9.19537e+07	7.15557e+07	1.48402e+08	1.46669e+08	1.34734e+08
Tb927.7.6920	hypothetical protein, conserved	3	Up-regulated	2.55815	0.0181931	21.1775	21.5148	21.4639	23.2644	22.5936	22.1725	2.37177e+06	2.99641e+06	2.8925e+06	1.00758e+07	6.32936e+06	4.72693e+06
Tb927.7.6960.1	ubiquitin-conjugating enzyme E2, putative	3	Up-regulated	1.78784	0.0081323	24.5223	24.94	24.7853	25.7167	25.3463	25.7003	2.4096e+07	3.21874e+07	2.89151e+07	5.51448e+07	4.26562e+07	5.45201e+07
Tb927.8.1490	Protein of unknown function (DUF1674), putative	3	Up-regulated	1.64007	0.00320959	25.8873	26.1347	25.7801	26.7139	26.6812	26.5676	6.2068e+07	7.36778e+07	5.76233e+07	1.10077e+08	1.07607e+08	9.94558e+07
Tb927.8.1580	hypothetical protein, conserved	4	Up-regulated	1.50188	0.00810423	25.0486	25.1987	25.2288	25.9435	25.5939	25.6821	3.47032e+07	3.85098e+07	3.93219e+07	6.45314e+07	5.06445e+07	5.38384e+07
Tb927.8.1945	hypothetical protein	2	Up-regulated	2.33074	0.00942919	23.1697	23.5176	22.6052	24.335	24.296	24.4608	9.4358e+06	1.20086e+07	6.38016e+06	2.11629e+07	2.05981e+07	2.30908e+07
Tb927.8.2080	Fungal tRNA ligase phosphodiesterase domain containing protein, putative	4	Up-regulated	2.29829	0.000166203	26.0369	26.2955	26.2083	27.4631	27.3092	27.3778	6.88451e+07	8.23615e+07	7.75329e+07	1.85023e+08	1.66293e+08	1.74392e+08
Tb927.8.2140	hypothetical protein, conserved	2	Up-regulated	2.15827	0.036665	20.7285	21.6569	21.3832	22.8015	22.3463	21.9837	1.73743e+06	3.30658e+06	2.73517e+06	7.3101e+06	5.33224e+06	4.14726e+06
Tb927.8.2220	hypothetical protein, conserved	5	Up-regulated	1.65823	0.0413776	25.6427	25.6722	25.1168	26.5348	26.1152	25.9751	5.23872e+07	5.34699e+07	3.63845e+07	9.72244e+07	7.26854e+07	6.59601e+07
Tb927.8.2250	Fungal tRNA ligase phosphodiesterase domain containing protein, putative	4	Up-regulated	2.03607	0.00729434	26.1697	26.7461	26.5702	27.7598	27.3952	27.439	7.54848e+07	1.12555e+08	9.96381e+07	2.27266e+08	1.76517e+08	1.81949e+08
Tb927.8.2370	dicer-like protein	10	Up-regulated	1.72247	0.0300509	25.1493	24.6386	24.8987	26.0374	25.4946	25.4806	3.7214e+07	2.61193e+07	3.12793e+07	6.88713e+07	4.72766e+07	4.68199e+07
Tb927.8.2380	ABC transporter, putative	9	Up-regulated	1.86452	7.76868e-05	25.729	25.7027	25.7812	26.7219	26.5523	26.6312	5.56155e+07	5.46098e+07	5.76671e+07	1.10687e+08	9.84125e+07	1.03939e+08
Tb927.8.2750	hypothetical protein, conserved	6	Up-regulated	2.14189	0.0117203	24.2396	24.6426	25.1023	25.7267	25.7327	25.9404	1.98087e+07	2.61909e+07	3.60198e+07	5.55275e+07	5.57579e+07	6.43911e+07
Tb927.8.2780	RNA-binding protein RBP10, putative	3	Up-regulated	10.4748	2.93469e-05	22.769	22.3176	22.7938	25.9966	26.1159	25.9785	7.14761e+06	5.22723e+06	7.27148e+06	6.69517e+07	7.27214e+07	6.61183e+07
Tb927.8.2850	Poly(A)-specific ribonuclease PARN-1	6	Up-regulated	1.54407	0.00163053	27.2791	27.4704	27.4074	28.0299	27.8992	28.107	1.6287e+08	1.85956e+08	1.78011e+08	2.74059e+08	2.50321e+08	2.89092e+08
Tb927.8.3410	Inositol hexakisphosphate, putative	24	Up-regulated	1.50002	0.00130143	27.1121	27.2305	27.1391	27.8617	27.6459	27.7234	1.4506e+08	1.57466e+08	1.47807e+08	2.43892e+08	2.10012e+08	2.21605e+08
Tb927.8.3550	mitogen-activated protein kinase 3, putative	7	Up-regulated	1.68814	0.00423005	25.9131	26.2624	26.2995	27.0047	26.9049	26.8584	6.3188e+07	8.04935e+07	8.25895e+07	1.34657e+08	1.25655e+08	1.21666e+08
Tb927.8.4000.2	ABC1 family, putative	2	Up-regulated	1.52766	0.0371746	24.8049	24.391	24.6179	25.4597	25.2453	24.9225	2.93108e+07	2.20005e+07	2.57461e+07	4.61455e+07	3.97733e+07	3.1799e+07
Tb927.8.4160	hypothetical protein, conserved	5	Up-regulated	2.03812	0.00579574	24.973	24.6831	24.4672	25.971	25.5469	25.6997	3.29332e+07	2.69375e+07	2.31933e+07	6.57741e+07	4.90227e+07	5.44979e+07
Tb927.8.4890	pol-associated gene 1	8	Up-regulated	2.08224	0.000808521	27.8093	27.8075	27.896	29.1066	28.741	28.8149	2.35192e+08	2.34906e+08	2.4976e+08	5.78045e+08	4.48641e+08	4.7223e+08
Tb927.8.5230	peptidyl-prolyl cis-trans isomerase, putative	3	Up-regulated	1.57546	0.0320038	24.6567	24.6715	24.4261	25.5779	25.0927	24.9939	2.64489e+07	2.67219e+07	2.25412e+07	5.00868e+07	3.57818e+07	3.34129e+07
Tb927.8.5570	transporter, putative	2	Up-regulated	1.5615	0.0498839	23.0084	23.6926	23.7521	24.0681	24.1746	24.245	8.43762e+06	1.35574e+07	1.41286e+07	1.75885e+07	1.89354e+07	1.98831e+07
Tb927.8.5820	Las1-like, putative	3	Up-regulated	2.7416	0.000751929	23.9548	24.0972	24.3648	25.663	25.3981	25.7302	1.62593e+07	1.79468e+07	2.16038e+07	5.31286e+07	4.42166e+07	5.56636e+07
Tb927.8.5830	SMP-30/Gluconolaconase/LRE-like region, putative	4	Up-regulated	1.54067	0.0365939	25.7425	25.5456	25.431	26.5292	26.0042	26.0082	5.61387e+07	4.8976e+07	4.52365e+07	9.6846e+07	6.73029e+07	6.74927e+07
Tb927.8.7970	hypothetical protein	5	Up-regulated	3.98966	0.000168934	24.7172	24.8013	24.749	27.0069	26.6909	26.5162	2.75809e+07	2.92362e+07	2.81969e+07	1.34866e+08	1.08331e+08	9.59798e+07
Tb927.8.8140	small GTP-binding rab protein, putative	1	Up-regulated	1.87595	0.0178471	21.2527	22.095	21.6512	22.6415	22.5672	22.6347	2.49867e+06	4.47965e+06	3.29357e+06	6.54269e+06	6.21461e+06	6.51229e+06
Tb927.9.10070	hypothetical protein, conserved	4	Up-regulated	3.9475	0.00796963	26.4839	26.9242	26.4262	29.1534	28.4931	27.9218	9.38545e+07	1.27347e+08	9.01747e+07	5.97083e+08	3.77802e+08	2.54271e+08
Tb927.9.12170	leucine-rich repeat protein (LRRP), putative	8	Up-regulated	1.74247	0.00308305	26.5061	26.6736	26.7524	27.6408	27.3077	27.3761	9.53097e+07	1.07044e+08	1.13051e+08	2.09266e+08	1.66129e+08	1.74187e+08
Tb927.9.12810	poly(ADP-ribose) glycohydrolase, putative	5	Up-regulated	1.78819	0.0236687	24.3654	24.5023	24.772	25.6913	25.4052	25.0089	2.16134e+07	2.37641e+07	2.86503e+07	5.41806e+07	4.44339e+07	3.37615e+07
Tb927.9.12960	transporter, putative	2	Up-regulated	1.60165	0.0212676	24.9999	25.1903	25.5129	26.0869	25.7085	25.968	3.3553e+07	3.82849e+07	4.78779e+07	7.12757e+07	5.48305e+07	6.56371e+07
Tb927.9.13630	hypothetical protein, conserved	4	Up-regulated	1.87183	0.00762678	23.6339	23.4233	23.2978	24.5741	24.4069	24.0612	1.30171e+07	1.12491e+07	1.03118e+07	2.49769e+07	2.22432e+07	1.75042e+07
Tb927.9.14050	Lipase (class 3), putative	4	Up-regulated	1.66013	0.0112462	24.1102	23.9397	23.898	24.9582	24.7016	24.4456	1.81092e+07	1.6091e+07	1.56325e+07	3.25966e+07	2.72844e+07	2.2848e+07
Tb927.9.14290	Cytokinesis initiation factor 2	5	Up-regulated	1.90828	0.00716621	24.4011	24.7811	24.5552	25.7963	25.3562	25.3618	2.21553e+07	2.88304e+07	2.46528e+07	5.82711e+07	4.2951e+07	4.31177e+07
Tb927.9.3030	hypothetical protein, conserved	2	Up-regulated	2.64549	0.0225298	21.4261	20.936	21.634	23.275	22.6176	22.1905	2.81773e+06	2.00622e+06	3.25456e+06	1.015e+07	6.43537e+06	4.78622e+06
Tb927.9.3650	Kinesin-13 1	5	Up-regulated	1.54544	0.046283	24.5551	25.1362	25.0572	25.776	25.325	25.5623	2.46508e+07	3.68769e+07	3.4911e+07	5.74595e+07	4.20338e+07	4.95471e+07
Tb927.9.4500	heat shock protein, putative	21	Up-regulated	2.29186	0.000628795	28.9513	29.1844	29.1482	30.4753	30.1379	30.2503	5.19037e+08	6.10083e+08	5.94959e+08	1.49276e+09	1.18146e+09	1.27714e+09
Tb927.9.6530	hypothetical protein	8	Up-regulated	1.73812	0.000464409	25.7376	25.8826	25.802	26.7179	26.5002	26.5922	5.59501e+07	6.18662e+07	5.85032e+07	1.10379e+08	9.49163e+07	1.01169e+08
Tb927.9.7210	mitochondrial exoribonuclease DSS-1	2	Up-regulated	1.50995	0.00523937	23.0285	22.9474	22.8006	23.429	23.4393	23.686	8.5557e+06	8.0883e+06	7.30589e+06	1.12935e+07	1.13742e+07	1.34953e+07
Tb927.9.7540	cysteine peptidase, Clan CA, family C2, putative	14	Up-regulated	2.32683	0.000268031	27.3173	27.4367	27.4764	28.788	28.4849	28.6011	1.67238e+08	1.81665e+08	1.86737e+08	4.63504e+08	3.75663e+08	4.07173e+08
Tb09.v4.0009	receptor-type adenylate cyclase, putative	9	Down-regulated	0.51159	0.00473276	27.181	27.4963	27.431	26.1448	26.4029	26.6368	1.52163e+08	1.89322e+08	1.80944e+08	7.41959e+07	8.87306e+07	1.04343e+08
Tb11.v5.0489.1-p1	retrotransposon hot spot (RHS) protein, putative	18	Down-regulated	0.653358	0.00368757	31.8845	32.1471	32.1553	31.446	31.3751	31.5352	3.96444e+09	4.75584e+09	4.78315e+09	2.9255e+09	2.78507e+09	3.11201e+09
Tb11.v5.0880.1-p1	UDP-Gal or UDP-GlcNAc-dependent glycosyltransferase, putative	2	Down-regulated	0.396286	0.0284686	25.1833	25.4194	25.2662	24.0075	23.0329	24.4817	3.80994e+07	4.48749e+07	4.03541e+07	1.68645e+07	8.58199e+06	2.34269e+07
Tb11.v5.1020.1-p1	retrotransposon hot spot (RHS) protein, putative	7	Down-regulated	0.518249	0.000797782	29.1994	29.4271	29.3724	28.2431	28.3952	28.5128	6.16433e+08	7.21839e+08	6.94984e+08	3.17704e+08	3.53023e+08	3.83006e+08
Tb927.1.120	retrotransposon hot spot protein 4 (RHS4), putative	33	Down-regulated	0.669993	0.00211328	32.5243	32.7365	32.7443	32.1423	32.0188	32.1182	6.17705e+09	7.15586e+09	7.19461e+09	4.74032e+09	4.3514e+09	4.66158e+09
Tb927.1.1470	conserved protein, unknown function	11	Down-regulated	0.543634	0.000477219	28.1205	28.2471	28.2074	27.3596	27.1603	27.4083	2.91816e+08	3.1859e+08	3.09928e+08	1.72212e+08	1.4999e+08	1.78122e+08
Tb927.1.1640	hypothetical protein, conserved	2	Down-regulated	0.545572	0.00416868	23.0414	22.9772	23.148	22.1527	21.9314	22.423	8.6327e+06	8.25695e+06	9.29495e+06	4.66257e+06	3.99946e+06	5.62355e+06
Tb927.1.1840	conserved protein, unknown function	2	Down-regulated	0.486128	0.0358878	24.3512	24.7126	24.5945	22.8775	23.3785	24.0587	2.14021e+07	2.74935e+07	2.53333e+07	7.70584e+06	1.09051e+07	1.74738e+07
Tb927.1.2820	pteridine transporter, putative	2	Down-regulated	0.481593	0.0197567	23.5459	23.6833	23.8772	22.6407	22.1068	23.0608	1.2247e+07	1.34702e+07	1.54079e+07	6.53935e+06	4.51651e+06	8.7497e+06
Tb927.1.3450	hypothetical protein, conserved	8	Down-regulated	0.556571	0.00644354	25.4232	25.6725	25.3926	24.8645	24.3916	24.674	4.49937e+07	5.34797e+07	4.40501e+07	3.05469e+07	2.20098e+07	2.67676e+07
Tb927.1.600	phosphate-repressible phosphate permease, putative	2	Down-regulated	0.628591	0.0219479	23.1945	23.7143	23.4474	22.6302	22.9811	22.7602	9.59908e+06	1.37633e+07	1.14382e+07	6.49194e+06	8.27932e+06	7.1041e+06
Tb927.10.10000	hypothetical protein, conserved	2	Down-regulated	0.228851	0.000627124	25.6668	25.8874	25.824	23.217	23.8172	23.8819	5.32691e+07	6.20716e+07	5.94019e+07	9.7505e+06	1.4781e+07	1.54586e+07
Tb927.10.10380	ATP-dependent DEAD/H RNA helicase, putative	8	Down-regulated	0.55714	0.00205814	26.8047	27.0349	26.9621	26.2584	25.92	26.0813	1.17225e+08	1.37504e+08	1.30736e+08	8.0274e+07	6.34867e+07	7.09971e+07
Tb927.10.10410	DNA replication licensing factor MCM8, putative	3	Down-regulated	0.583668	0.033013	22.9603	22.7852	22.9757	21.6325	22.1599	22.4824	8.16094e+06	7.22821e+06	8.24867e+06	3.25112e+06	4.68596e+06	5.85957e+06
Tb927.10.11030	Archaic translocase of outer membrane 11 kDa subunit	3	Down-regulated	0.600439	0.0336766	25.1388	25.2658	25.0235	23.9141	24.573	24.6385	3.69424e+07	4.03413e+07	3.41053e+07	1.58071e+07	2.49584e+07	2.61168e+07
Tb927.10.11060	hypothetical protein, conserved	4	Down-regulated	0.645098	0.00421937	26.5911	26.8071	26.7677	26.0201	25.9852	26.257	1.01089e+08	1.17418e+08	1.14259e+08	6.80499e+07	6.6422e+07	8.01951e+07
Tb927.10.11270	RBP23	4	Down-regulated	0.581404	0.00248483	26.6064	26.7087	26.7906	25.7476	25.8906	26.1038	1.0217e+08	1.09682e+08	1.16083e+08	5.63396e+07	6.22067e+07	7.2116e+07
Tb927.10.11850	WD domain, G-beta repeat, putative	3	Down-regulated	0.403523	0.0213803	25.9996	25.9551	26.058	23.8653	24.8098	25.1341	6.70921e+07	6.50507e+07	6.98626e+07	1.52817e+07	2.94101e+07	3.6822e+07
Tb927.10.12030	hypothetical protein, conserved	5	Down-regulated	0.61194	0.00189587	27.2492	27.5034	27.4502	26.6403	26.6305	26.8114	1.59528e+08	1.90262e+08	1.83371e+08	1.04601e+08	1.03892e+08	1.1777e+08
Tb927.10.12330	ZC3H34	3	Down-regulated	0.431258	0.000143212	25.3017	25.3798	25.3156	24.1782	23.9514	24.2146	4.13577e+07	4.36584e+07	4.17595e+07	1.89835e+07	1.6221e+07	1.94685e+07
Tb927.10.13030	cysteine peptidase, Clan CA, family C2, putative	2	Down-regulated	0.660702	0.0153753	22.0285	22.0176	22.1109	21.5747	21.145	21.6015	4.2781e+06	4.24588e+06	4.52931e+06	3.12348e+06	2.31889e+06	3.18197e+06
Tb927.10.13490	CAMK/CAMKL family protein kinase, putative	2	Down-regulated	0.580819	0.00903313	22.8832	23.3657	23.1262	22.1807	22.4605	22.4075	7.73629e+06	1.08085e+07	9.15525e+06	4.75409e+06	5.7713e+06	5.5633e+06
Tb927.10.15680	hypothetical protein, conserved	4	Down-regulated	0.630494	0.00466262	23.7748	23.5789	23.5357	23.0934	22.7879	23.0063	1.43528e+07	1.25304e+07	1.21601e+07	8.94978e+06	7.24153e+06	8.42526e+06
Tb927.10.3300	Domain of unknown function (DUF4206), putative	2	Down-regulated	0.25258	0.00169694	22.8731	23.1239	23.2022	20.5469	21.2728	21.3218	7.68243e+06	9.14099e+06	9.65073e+06	1.53189e+06	2.53371e+06	2.62124e+06
Tb927.10.3470	Ankyrin repeats (3 copies), putative	3	Down-regulated	0.35089	0.0144402	23.0746	23.171	23.5855	22.3919	21.3196	21.3697	8.83356e+06	9.4441e+06	1.25876e+07	5.5035e+06	2.61713e+06	2.70969e+06
Tb927.10.3900	CAMK/CAMKL family protein kinase, putative	13	Down-regulated	0.587318	3.35596e-05	26.6539	26.7556	26.6917	25.9468	25.8882	25.9637	1.0559e+08	1.13303e+08	1.08396e+08	6.46786e+07	6.21036e+07	6.54407e+07
Tb927.10.4170	hypothetical protein, conserved	7	Down-regulated	0.619326	0.00302274	24.4249	24.7609	24.7046	23.9105	23.9905	23.9365	2.25223e+07	2.84304e+07	2.73424e+07	1.5768e+07	1.66672e+07	1.6055e+07
Tb927.10.5910	Basal body protein	2	Down-regulated	0.658866	0.00187012	22.7984	23.0011	22.83	22.1874	22.3706	22.2682	7.29437e+06	8.39511e+06	7.45636e+06	4.77601e+06	5.42275e+06	5.05125e+06
Tb927.10.6090	tRNA pseudouridine synthase A, putative	3	Down-regulated	0.362959	0.000336875	24.7908	24.9761	25.1126	23.5095	23.341	23.6447	2.90247e+07	3.30039e+07	3.62772e+07	1.19413e+07	1.0625e+07	1.31147e+07
Tb927.10.6110	hypothetical protein, conserved	2	Down-regulated	0.408152	0.0433327	22.8062	22.2374	22.2149	20.2583	21.7716	21.0452	7.33408e+06	4.94454e+06	4.86795e+06	1.25419e+06	3.58028e+06	2.16394e+06
Tb927.10.6670	dynein light chain, putative	4	Down-regulated	0.661954	0.00226228	24.6385	24.8006	24.6922	23.9876	24.1168	24.2355	2.61173e+07	2.92239e+07	2.71079e+07	1.66334e+07	1.81915e+07	1.97527e+07
Tb927.10.8490	glucose transporter, putative	8	Down-regulated	0.650894	0.0104678	28.6798	29.0666	29.0316	28.2085	28.3624	28.3736	4.30022e+08	5.6224e+08	5.48777e+08	3.10168e+08	3.45099e+08	3.47785e+08
Tb927.10.9080	pteridine transporter, putative	8	Down-regulated	0.516908	0.000319313	29.5642	29.7791	29.8006	28.7607	28.7127	28.8238	7.93796e+08	9.21305e+08	9.35122e+08	4.54826e+08	4.39933e+08	4.75162e+08
Tb927.11.10370	glycosyl hydrolase-like protein	13	Down-regulated	0.646879	0.00807153	27.1955	27.4369	27.5655	26.8162	26.6455	26.8659	1.53694e+08	1.81692e+08	1.9863e+08	1.18166e+08	1.04975e+08	1.22303e+08
Tb927.11.10850	hypothetical protein, conserved	4	Down-regulated	0.591379	0.000583064	24.6448	24.8106	24.7935	24.0319	23.8818	24.061	2.62312e+07	2.94264e+07	2.90789e+07	1.71523e+07	1.54571e+07	1.75021e+07
Tb927.11.11140	hypothetical protein	3	Down-regulated	0.520071	0.00096048	25.1429	25.2795	25.4722	24.2854	24.3381	24.4552	3.70492e+07	4.07263e+07	4.65467e+07	2.04479e+07	2.1208e+07	2.30004e+07
Tb927.11.11900	Coatomer subunit gamma	16	Down-regulated	0.52102	0.000837272	29.5534	29.7324	29.7552	28.8617	28.5808	28.7711	7.87877e+08	8.91968e+08	9.06184e+08	4.87784e+08	4.01493e+08	4.58095e+08
Tb927.11.11950	cytochrome oxidase assembly protein, putative	3	Down-regulated	0.642055	0.0107106	27.0108	27.289	27.1915	26.5778	26.2942	26.6873	1.3523e+08	1.63986e+08	1.53271e+08	1.00166e+08	8.22914e+07	1.08064e+08
Tb927.11.12410	kinetoplastid kinetochore protein 10	12	Down-regulated	0.648414	0.000785541	28.2109	28.353	28.3554	27.7755	27.6131	27.6554	3.10692e+08	3.42855e+08	3.43428e+08	2.29751e+08	2.05295e+08	2.11406e+08
Tb927.11.12560	hypothetical protein	7	Down-regulated	0.544925	3.86198e-05	25.6561	25.6772	25.7491	24.8331	24.8683	24.7526	5.28764e+07	5.36544e+07	5.63947e+07	2.98881e+07	3.06274e+07	2.82668e+07
Tb927.11.12590	Der1-like family, putative	2	Down-regulated	0.480118	0.0433147	25.9063	26.3306	26.2668	24.3145	25.3237	25.4744	6.28881e+07	8.43913e+07	8.0741e+07	2.08645e+07	4.19937e+07	4.66185e+07
TB927.11.13260.2-P1	hypothetical protein, conserved	4	Down-regulated	0.361744	0.000872211	24.6462	25.0363	25.0753	23.6381	23.3662	23.3733	2.62562e+07	3.44084e+07	3.53524e+07	1.30549e+07	1.08127e+07	1.08659e+07
Tb927.11.13570	hypothetical protein, conserved	2	Down-regulated	0.0190287	0.00121023	23.3562	24.2939	24.3214	17.6217	19.3059	17.1438	1.07379e+07	2.05676e+07	2.09646e+07	201686	648140	144805
Tb927.11.13610	rhodanese-like domain containing protein, putative	5	Down-regulated	0.433757	0.000123273	29.217	29.3565	29.3435	28.1958	27.9659	28.1345	6.24002e+08	6.87368e+08	6.81185e+08	3.07447e+08	2.62164e+08	2.94674e+08
Tb927.11.14090	Double RNA binding domain protein 18	13	Down-regulated	0.405489	0.000265881	31.0794	31.3629	31.2621	30.0307	29.8028	29.9688	2.26893e+09	2.76176e+09	2.57523e+09	1.09684e+09	9.3654e+08	1.05074e+09
Tb927.11.14280	septum formation protein MAF homologue, putative	5	Down-regulated	0.348248	0.000425981	26.972	27.2846	27.1994	25.4801	25.5684	25.8357	1.31634e+08	1.63482e+08	1.54112e+08	4.68022e+07	4.97565e+07	5.98839e+07
Tb927.11.1480	receptor-type adenylate cyclase GRESAG 4, putative	19	Down-regulated	0.146528	2.96388e-05	28.7871	28.7021	28.7451	25.8573	25.8105	26.2198	4.63222e+08	4.3671e+08	4.49909e+08	6.0787e+07	5.88492e+07	7.81536e+07
Tb927.11.17040	procyclic-enriched flagellar receptor adenylate cyclase 1	8	Down-regulated	0.583245	0.000620281	27.1163	27.1547	27.3085	26.5121	26.3255	26.4096	1.45486e+08	1.49409e+08	1.66223e+08	9.57065e+07	8.4096e+07	8.9142e+07
Tb927.11.2330	molybdopterin synthase sulphurylase protein, putative	8	Down-regulated	0.665645	0.00984239	26.1425	26.4226	26.267	25.7276	25.5017	25.8353	7.4078e+07	8.9951e+07	8.07548e+07	5.55606e+07	4.75086e+07	5.987e+07
Tb927.11.2750	Present in the outer mitochondrial membrane proteome 12	13	Down-regulated	0.656508	0.00243037	27.7549	27.8557	27.7834	27.3522	27.0737	27.1335	2.26496e+08	2.42887e+08	2.31012e+08	1.7133e+08	1.41251e+08	1.47234e+08
Tb927.11.5840	Protein translation factor SUI1 homolog, putative	3	Down-regulated	0.641951	0.0349539	27.3772	27.8352	27.7795	26.749	27.0885	27.2356	1.74323e+08	2.39455e+08	2.30389e+08	1.12787e+08	1.42713e+08	1.58023e+08
Tb927.11.5850	RNA-binding protein 38, putative	10	Down-regulated	0.638153	0.00511491	27.4079	27.5804	27.631	27.0565	26.8837	26.7254	1.7807e+08	2.0069e+08	2.07861e+08	1.3958e+08	1.23821e+08	1.10953e+08
Tb927.11.5940	receptor-type adenylate cyclase GRESAG 4, putative	7	Down-regulated	0.390153	0.000326156	25.8221	26.1292	26.1375	24.7566	24.5705	24.7036	5.93243e+07	7.33954e+07	7.38179e+07	2.83444e+07	2.49145e+07	2.73224e+07
Tb927.11.600	Mitochondrial ATP synthase subunit, putative	2	Down-regulated	0.648551	0.0393946	25.7904	26.1342	26.1874	25.1018	25.4194	25.6887	5.80334e+07	7.3652e+07	7.6418e+07	3.60067e+07	4.48755e+07	5.40834e+07
Tb927.11.6180	60S ribosomal protein L28, putative	6	Down-regulated	0.536984	0.0148718	29.7045	30.2949	30.1717	28.9569	29.1874	29.3708	8.749e+08	1.31726e+09	1.20946e+09	5.21076e+08	6.11325e+08	6.9421e+08
Tb927.11.7290	pantothenate kinase subunit, putative	16	Down-regulated	0.460495	0.00310096	28.3972	28.4486	28.4546	27.6388	27.1903	27.0481	3.53522e+08	3.66327e+08	3.67867e+08	2.08979e+08	1.53141e+08	1.38769e+08
Tb927.11.7475	AN1-like Zinc finger containing protein, putative	2	Down-regulated	0.52235	0.00649141	24.4064	24.6652	24.6989	23.3558	23.6742	23.8966	2.22355e+07	2.66042e+07	2.72331e+07	1.07347e+07	1.33856e+07	1.56163e+07
Tb927.11.7600	hypothetical protein, conserved	4	Down-regulated	0.495958	0.00155316	27.243	27.5028	27.6112	26.5675	26.4523	26.3154	1.5884e+08	1.90181e+08	2.05022e+08	9.9453e+07	9.18222e+07	8.35067e+07
Tb927.11.8080	btb/poz domain containing protein, putative	3	Down-regulated	0.642928	0.0329236	23.713	23.8241	23.924	22.7677	23.3206	23.3916	1.37502e+07	1.48512e+07	1.59167e+07	7.14103e+06	1.04761e+07	1.10048e+07
Tb927.11.8990	cation transporter, putative	2	Down-regulated	0.351227	0.00163107	25.8879	26.1424	26.5587	24.7088	24.6968	24.7351	6.20921e+07	7.407e+07	9.8845e+07	2.74208e+07	2.7194e+07	2.79261e+07
Tb927.11.9120	SNF2 family N-terminal domain/Ring finger domain containing protein, putative	5	Down-regulated	0.635281	0.00360146	26.8392	26.8055	26.8206	26.3733	26.073	26.031	1.20062e+08	1.17292e+08	1.18527e+08	8.69247e+07	7.05939e+07	6.85651e+07
Tb927.11.950	DRBD14	2	Down-regulated	0.353231	0.00204318	22.743	23.0101	23.2112	21.1612	21.6045	21.6801	7.01994e+06	8.44754e+06	9.71136e+06	2.34499e+06	3.18869e+06	3.36027e+06
Tb927.11.970	hypothetical protein, conserved	3	Down-regulated	0.502841	0.0481196	23.8823	24.2624	23.5378	22.3097	23.0096	23.3064	1.54624e+07	2.01233e+07	1.21778e+07	5.19874e+06	8.44489e+06	1.03738e+07
Tb927.2.1100	retrotransposon hot spot protein 3 (RHS3), degenerate	6	Down-regulated	0.633554	0.00293556	30.7711	30.9307	31.0322	30.1245	30.285	30.3517	1.83243e+09	2.04678e+09	2.196e+09	1.17052e+09	1.3083e+09	1.37016e+09
Tb927.2.2130	small GTP-binding protein RAB6, putative	9	Down-regulated	0.606206	0.00278892	28.1292	28.424	28.4367	27.6632	27.5282	27.6488	2.93586e+08	3.60141e+08	3.63332e+08	2.12552e+08	1.93562e+08	2.10434e+08
Tb927.2.2140	hypothetical protein, conserved	2	Down-regulated	0.490687	0.000226183	25.0002	25.19	25.1987	24.0132	24.1163	24.1816	3.35589e+07	3.82766e+07	3.85102e+07	1.69316e+07	1.81863e+07	1.90274e+07
Tb927.2.3370	UDP-Gal or UDP-GlcNAc-dependent glycosyltransferase, putative	7	Down-regulated	0.624487	0.00272431	27.4566	27.6883	27.7234	26.944	26.8443	27.0492	1.84185e+08	2.16277e+08	2.21603e+08	1.29105e+08	1.2049e+08	1.38876e+08
Tb927.2.4580	UNC119	5	Down-regulated	0.555201	0.00468921	29.5687	29.9455	29.8481	28.767	28.9546	29.1007	7.96261e+08	1.03397e+09	9.66416e+08	4.56792e+08	5.20236e+08	5.75671e+08
Tb927.2.470	retrotransposon hot spot protein 4 (RHS4), putative	25	Down-regulated	0.663844	0.00141563	32.3539	32.5532	32.5442	31.9161	31.8219	31.9458	5.48901e+09	6.30228e+09	6.26291e+09	4.05241e+09	3.79618e+09	4.13657e+09
Tb927.2.6090	60S ribosomal protein L44	8	Down-regulated	0.611383	0.0446806	29.3667	29.7884	29.7116	28.4842	28.9668	29.2251	6.92262e+08	9.27255e+08	8.79202e+08	3.75485e+08	5.24658e+08	6.27533e+08
Tb927.3.1160	hypothetical protein, conserved	2	Down-regulated	0.579228	0.000184074	24.7684	24.7708	24.7518	24.0812	23.8777	23.9615	2.85785e+07	2.86252e+07	2.82507e+07	1.77486e+07	1.54133e+07	1.63357e+07
Tb927.3.1370	40S ribosomal protein S25, putative	4	Down-regulated	0.572913	0.0382575	27.4695	28.047	28.2619	27.0046	27.3209	27.1358	1.85843e+08	2.77333e+08	3.21864e+08	1.34646e+08	1.67649e+08	1.47464e+08
Tb927.3.1700	diacylglycerol acyltransferase, putative	2	Down-regulated	0.525717	0.00107703	24.8741	25.1071	25.0097	23.9747	23.9858	24.2409	3.0751e+07	3.61396e+07	3.37798e+07	1.6485e+07	1.66129e+07	1.98263e+07
Tb927.3.2120	hypothetical protein, conserved	2	Down-regulated	0.645075	0.0411909	23.8827	24.0292	24.1247	23.1503	23.1289	23.7734	1.54667e+07	1.71202e+07	1.82921e+07	9.30985e+06	9.17264e+06	1.43383e+07
Tb927.3.3950	hypothetical protein, conserved	4	Down-regulated	0.603585	0.0403323	24.1095	24.7092	24.2991	23.4482	23.9768	23.5148	1.81004e+07	2.74293e+07	2.06421e+07	1.14447e+07	1.65098e+07	1.19859e+07
Tb927.3.5290	hypothetical protein, conserved	5	Down-regulated	0.488502	0.000905084	24.3378	24.5641	24.6484	23.3696	23.4731	23.614	2.12031e+07	2.48038e+07	2.62967e+07	1.08378e+07	1.16441e+07	1.28384e+07
Tb927.3.5360	FHA domain containing protein, putative	1	Down-regulated	0.627987	0.0423337	24.2786	24.8738	24.3871	23.6716	23.7867	24.104	2.03515e+07	3.07432e+07	2.19403e+07	1.33619e+07	1.44717e+07	1.80313e+07
Tb927.3.5470	hypothetical protein, conserved	3	Down-regulated	0.646511	0.00412874	23.895	24.2277	24.1278	23.3868	23.4775	23.5154	1.55997e+07	1.9646e+07	1.83318e+07	1.0968e+07	1.16799e+07	1.19906e+07
Tb927.3.700	hypothetical protein, conserved	2	Down-regulated	0.663305	0.0115204	28.1211	28.4788	28.3638	27.6726	27.6297	27.8934	2.91942e+08	3.74099e+08	3.4543e+08	2.13934e+08	2.07672e+08	2.49308e+08
Tb927.3.880	Ankyrin repeats (3 copies), putative	3	Down-regulated	0.642507	0.0225006	24.9187	25.1678	25.2129	24.1551	24.6759	24.5224	3.17168e+07	3.7692e+07	3.88893e+07	1.86813e+07	2.68029e+07	2.40979e+07
Tb927.4.1090	endosomal integral membrane protein, putative	2	Down-regulated	0.589366	0.0255958	23.2141	23.7007	23.6086	22.4326	22.9832	22.8105	9.7307e+06	1.36336e+07	1.27907e+07	5.66084e+06	8.29168e+06	7.356e+06
Tb927.4.1190	LicD family, putative	2	Down-regulated	0.656548	0.00630242	25.168	25.3456	25.3621	24.6955	24.5034	24.8435	3.76977e+07	4.26369e+07	4.31264e+07	2.71692e+07	2.37831e+07	3.01058e+07
Tb927.4.1670	cytochrome b5-like Heme/Steroid binding domain containing protein, putative	2	Down-regulated	0.568512	0.00100736	25.9882	25.9802	26.1069	25.3678	25.0742	25.1772	6.6564e+07	6.6194e+07	7.22721e+07	4.32981e+07	3.53247e+07	3.79394e+07
Tb927.4.2180	60S ribosomal protein L35a, putative	10	Down-regulated	0.630065	0.0313267	30.93	31.3387	31.231	30.187	30.5189	30.7669	2.04584e+09	2.71566e+09	2.5203e+09	1.22236e+09	1.53855e+09	1.8271e+09
Tb927.4.2650	Regulator of chromosome condensation (RCC1) repeat, putative	2	Down-regulated	0.585766	0.0102486	24.2787	23.7676	24.2019	23.2691	23.4157	23.295	2.03527e+07	1.42815e+07	1.92968e+07	1.01085e+07	1.11903e+07	1.02921e+07
Tb927.4.3040	Enriched in surface-labeled proteome protein 11	3	Down-regulated	0.381368	0.023733	23.7146	23.2142	23.889	22.1537	21.5446	22.7717	1.37655e+07	9.73144e+06	1.55345e+07	4.66567e+06	3.05887e+06	7.16078e+06
Tb927.4.3180	hypothetical protein, conserved	3	Down-regulated	0.664416	0.0209939	26.133	26.2012	26.4692	25.4766	25.6455	25.902	7.35911e+07	7.71505e+07	9.29011e+07	4.66913e+07	5.24886e+07	6.27004e+07
Tb927.4.650	chaperone protein DnaJ, putative	2	Down-regulated	0.498231	0.0240649	26.0415	26.2357	26.4072	24.7858	25.0252	25.7142	6.90674e+07	7.90169e+07	8.89943e+07	2.8924e+07	3.41467e+07	5.50493e+07
Tb927.5.1490	Eukaryotic translation initiation factor 4 gamma 1	21	Down-regulated	0.542305	0.000196052	28.3724	28.4559	28.3929	27.6466	27.4477	27.4715	3.47489e+08	3.68193e+08	3.5247e+08	2.10117e+08	1.83052e+08	1.86095e+08
Tb927.5.1760	Isoprenylcysteine alpha-carbonyl methylesterase, putative	6	Down-regulated	0.514289	0.00122872	27.1999	27.5639	27.4934	26.3986	26.4967	26.5066	1.54164e+08	1.98407e+08	1.88942e+08	8.84645e+07	9.46887e+07	9.53411e+07
Tb927.5.2260	conserved protein	4	Down-regulated	0.538908	0.0126528	27.7086	28.3512	28.1749	27.3373	27.1557	27.1308	2.19347e+08	3.42419e+08	3.03025e+08	1.6957e+08	1.49516e+08	1.46957e+08
Tb927.5.4030	U6 snRNA-associated Sm-like protein LSm7p	2	Down-regulated	0.562425	0.0219697	27.4325	27.6087	27.2256	26.1813	26.656	26.8788	1.81139e+08	2.0466e+08	1.56934e+08	7.60956e+07	1.05744e+08	1.23407e+08
Tb927.5.440	trans-sialidase, putative	33	Down-regulated	0.578331	0.00104597	32.9218	33.0068	33.0566	32.367	32.0897	32.1464	8.13657e+09	8.63035e+09	8.93353e+09	5.53923e+09	4.57042e+09	4.75372e+09
Tb927.5.4560	guanine deaminase, putative	11	Down-regulated	0.638188	0.00060011	28.2844	28.4903	28.4132	27.7585	27.7002	27.7914	3.26935e+08	3.77087e+08	3.57457e+08	2.27059e+08	2.18074e+08	2.3229e+08
Tb927.6.1510	lysyl-tRNA synthetase, putative	2	Down-regulated	0.624671	0.0219956	23.2761	22.9311	22.9923	22.2925	22.1605	22.6818	1.01576e+07	7.99746e+06	8.34388e+06	5.13701e+06	4.68779e+06	6.72829e+06
Tb927.6.1640	single strand-specific nuclease, putative	1	Down-regulated	0.566166	0.00936946	23.9795	24.3759	24.0803	23.3211	23.1011	23.547	1.65408e+07	2.17716e+07	1.77376e+07	1.04799e+07	8.99772e+06	1.22559e+07
Tb927.6.1760	KU80 protein	1	Down-regulated	0.350312	0.0185593	21.8971	22.7526	22.1464	20.1304	21.1215	20.9606	3.90557e+06	7.06653e+06	4.64228e+06	1.14777e+06	2.28143e+06	2.04071e+06
Tb927.6.200	receptor-type adenylate cyclase GRESAG 4, putative	11	Down-regulated	0.483035	0.0043755	27.5605	27.7961	27.7193	26.9479	26.3704	26.5569	1.97947e+08	2.33054e+08	2.2098e+08	1.29454e+08	8.67542e+07	9.87218e+07
Tb927.6.2130	nuclear movement protein, putative	5	Down-regulated	0.587652	0.0058765	25.8235	25.8484	26.0936	25.3647	24.9685	25.1193	5.93816e+07	6.04168e+07	7.16064e+07	4.32038e+07	3.28296e+07	3.64459e+07
Tb927.6.2450	Protein kinase B, putative	2	Down-regulated	0.632483	0.00739267	24.2073	24.5903	24.4463	23.7481	23.6476	23.8815	1.93698e+07	2.52591e+07	2.28603e+07	1.40898e+07	1.31416e+07	1.54544e+07
Tb927.6.3000	sphingolipid delta 4 desaturase, putative	2	Down-regulated	0.57249	0.0320697	24.3276	25.0481	24.7008	23.7697	23.7882	24.1594	2.10544e+07	3.46916e+07	2.7269e+07	1.43015e+07	1.44862e+07	1.87375e+07
Tb927.6.3640	zinc finger of C3HC4-type, RING/B-box zinc finger, putative	4	Down-regulated	0.629572	0.024037	24.1099	24.3157	24.2894	23.904	23.2895	23.4556	1.81058e+07	2.08809e+07	2.05034e+07	1.56973e+07	1.02523e+07	1.15035e+07
Tb927.6.3650	ADP-ribosylation factor-like protein 3C, putative	8	Down-regulated	0.616254	0.0010159	31.2863	31.498	31.4754	30.7799	30.6325	30.7571	2.61895e+09	3.03289e+09	2.98575e+09	1.84359e+09	1.66459e+09	1.81478e+09
Tb927.6.3690	pre-mRNA cleavage complex II Clp1-like, conserved	3	Down-regulated	0.578387	0.0217307	25.327	25.9942	25.8175	24.9548	25.0544	24.8307	4.20902e+07	6.68379e+07	5.91327e+07	3.25205e+07	3.4844e+07	2.98397e+07
Tb927.6.4440	RNA-binding protein 42 (RNA-binding motif protein 42)	5	Down-regulated	0.43224	0.0317803	25.3821	25.64	25.6271	24.9905	23.6404	24.0602	4.3729e+07	5.22879e+07	5.18235e+07	3.33349e+07	1.30761e+07	1.74915e+07
Tb927.7.2070	heat shock protein DNAJ, putative	8	Down-regulated	0.566638	0.0014675	27.745	28.0525	27.9948	27.124	27.0338	27.19	2.24946e+08	2.78379e+08	2.67477e+08	1.46264e+08	1.37397e+08	1.53106e+08
Tb927.7.2100	GMP synthase [glutamine-hydrolysing]	16	Down-regulated	0.585982	0.00157822	30.2781	30.5252	30.4477	29.6778	29.5128	29.7481	1.30206e+09	1.54523e+09	1.46446e+09	8.58837e+08	7.66036e+08	9.01729e+08
Tb927.7.2140	ZC3H18	5	Down-regulated	0.420955	0.000198652	27.8076	28.0988	28.0185	26.7559	26.6538	26.7826	2.34919e+08	2.8747e+08	2.71891e+08	1.13328e+08	1.05586e+08	1.15442e+08
Tb927.7.2510	endoplasmatic reticulum retrieval protein, putative	2	Down-regulated	0.36405	0.00524039	25.3259	26.0539	26.091	24.4092	24.2905	24.5103	4.20588e+07	6.96618e+07	7.14797e+07	2.22786e+07	2.05191e+07	2.38963e+07
Tb927.7.2590	prefoldin, putative	3	Down-regulated	0.605358	0.0256735	26.1185	26.589	26.2655	25.2909	25.6899	25.811	7.28552e+07	1.00949e+08	8.06686e+07	4.10493e+07	5.41305e+07	5.88671e+07
Tb927.7.2660	ZC3H20	4	Down-regulated	0.54752	0.00314943	27.7114	28.0476	27.9716	26.8631	27.1054	27.1593	2.19767e+08	2.77442e+08	2.63208e+08	1.22063e+08	1.44394e+08	1.49886e+08
Tb927.7.2670	ZC3H21	14	Down-regulated	0.5279	0.000427329	28.7631	28.972	28.9982	27.9782	27.9263	28.0714	4.55567e+08	5.26544e+08	5.36217e+08	2.64401e+08	2.55072e+08	2.82052e+08
Tb927.7.2680	ZC3H22	20	Down-regulated	0.327006	0.000145067	29.2991	29.5905	29.5926	27.9189	27.7716	27.966	6.60539e+08	8.08385e+08	8.09576e+08	2.53768e+08	2.29128e+08	2.62187e+08
Tb927.7.290	leucine-rich repeat protein 1 (LRRP1), putative	2	Down-regulated	0.40635	0.000108662	24.6585	24.8335	24.6607	23.5293	23.3123	23.4124	2.64821e+07	2.98971e+07	2.65225e+07	1.21067e+07	1.04163e+07	1.11641e+07
Tb927.7.330	Thioesterase-like superfamily, putative	2	Down-regulated	0.631464	0.00687732	24.1391	24.5177	24.4626	23.6775	23.8158	23.6596	1.84754e+07	2.40195e+07	2.31188e+07	1.34163e+07	1.47658e+07	1.32506e+07
Tb927.7.3700	hypothetical protein, conserved	12	Down-regulated	0.395971	0.0045816	29.5343	30.2017	30.2161	28.6629	28.6311	28.7453	7.77532e+08	1.23489e+09	1.24726e+09	4.24991e+08	4.15751e+08	4.49995e+08
Tb927.7.3760	phosphatidylserine synthase, putative	2	Down-regulated	0.611643	0.00831443	22.3791	22.4281	22.6459	21.9583	21.5405	21.8102	5.45487e+06	5.64339e+06	6.56305e+06	4.07476e+06	3.05032e+06	3.67735e+06
Tb927.7.4390	threonine synthase, putative	20	Down-regulated	0.653559	0.0024919	30.0974	30.307	30.2317	29.6947	29.4694	29.6297	1.14873e+09	1.32839e+09	1.26079e+09	8.68941e+08	7.43306e+08	8.30698e+08
Tb927.7.5130	hypothetical protein, conserved	5	Down-regulated	0.624262	0.00291098	26.7356	26.9342	26.8793	26.3069	26.0075	26.187	1.11746e+08	1.28233e+08	1.23447e+08	8.3017e+07	6.74606e+07	7.63949e+07
Tb927.7.5770	Nuclear Dbf2-related kinase	5	Down-regulated	0.447751	0.00088589	26.5027	26.6716	26.7413	25.6358	25.2638	25.5239	9.50833e+07	1.06896e+08	1.12186e+08	5.21352e+07	4.02869e+07	4.82457e+07
Tb927.7.5940	PAD2	7	Down-regulated	0.619394	0.00489698	28.505	28.7968	28.7361	28.1572	27.8925	27.9161	3.80955e+08	4.66337e+08	4.47135e+08	2.99337e+08	2.49162e+08	2.53261e+08
Tb927.7.5950	PAD3	8	Down-regulated	0.588014	0.00218016	28.7538	28.9756	28.9672	28.0164	28.0885	28.2901	4.5265e+08	5.27885e+08	5.24806e+08	2.71509e+08	2.8542e+08	3.28233e+08
Tb927.7.840	Mitochondrial ATP synthase subunit, putative	4	Down-regulated	0.669793	0.0104756	26.7392	27.072	27.1089	26.4879	26.3405	26.3809	1.12019e+08	1.41088e+08	1.4474e+08	9.41134e+07	8.49733e+07	8.73882e+07
Tb927.8.1510	ATP-dependent RNA helicase DBP2B, putative	24	Down-regulated	0.58749	0.000519483	30.4201	30.4971	30.5545	29.8133	29.5969	29.7539	1.43671e+09	1.51543e+09	1.57692e+09	9.43406e+08	8.12014e+08	9.05362e+08
Tb927.8.1770	hypothetical protein, conserved	2	Down-regulated	0.633198	0.0028853	27.6988	27.8338	27.7684	27.1182	26.9318	27.2579	2.17851e+08	2.39222e+08	2.2863e+08	1.45679e+08	1.28023e+08	1.60484e+08
Tb927.8.1810	serine peptidase, Clan S-, family S54, putative	2	Down-regulated	0.532139	0.00842227	24.5537	25.0262	24.7655	23.6265	23.9327	24.0609	2.46256e+07	3.41695e+07	2.85198e+07	1.29504e+07	1.6013e+07	1.75002e+07
Tb927.8.2160	p-glycoprotein	33	Down-regulated	0.661533	0.0023838	30.6802	30.8883	30.8518	30.2968	30.0985	30.2378	1.72047e+09	1.98746e+09	1.93778e+09	1.31904e+09	1.14963e+09	1.26615e+09
Tb927.8.3070	hypothetical protein, conserved	2	Down-regulated	0.612786	0.0315847	21.8975	22.0157	21.974	20.8201	21.2445	21.601	3.90666e+06	4.2403e+06	4.11944e+06	1.8513e+06	2.48444e+06	3.18094e+06
Tb927.8.3200	Rapamycin-insensitive companion of TOR2	9	Down-regulated	0.612102	0.0419368	25.9646	26.1401	26.1298	24.847	25.5045	25.6461	6.54841e+07	7.39507e+07	7.34245e+07	3.01774e+07	4.7603e+07	5.25114e+07
Tb927.8.3460	Ring finger domain containing protein, putative	2	Down-regulated	0.322448	0.0269986	22.9335	23.1943	22.9377	22.1473	20.33	21.1363	8.01056e+06	9.59772e+06	8.03383e+06	4.64517e+06	1.3181e+06	2.30497e+06
Tb927.8.3630	folate transporter, putative	8	Down-regulated	0.404274	0.000103483	27.9368	28.1624	28.1519	26.8589	26.7164	26.7633	2.56924e+08	3.00409e+08	2.98244e+08	1.21712e+08	1.10267e+08	1.13908e+08
Tb927.8.4940	hypothetical protein, conserved	7	Down-regulated	0.649324	0.00177409	26.8923	27.125	26.9462	26.4393	26.2824	26.3789	1.24567e+08	1.46366e+08	1.29301e+08	9.09954e+07	8.16208e+07	8.72655e+07
Tb927.8.4950	Kinesin Localized to the Ingressing Furrow	8	Down-regulated	0.66925	0.000819696	26.2997	26.4389	26.398	25.8965	25.7459	25.7547	8.26017e+07	9.09699e+07	8.8431e+07	6.24618e+07	5.62696e+07	5.66139e+07
Tb927.8.5070	hypothetical protein, conserved	6	Down-regulated	0.448946	0.0114502	30.1685	30.6022	30.6311	28.8719	29.4125	29.6009	1.2068e+09	1.62993e+09	1.66293e+09	4.91263e+08	7.14586e+08	8.14255e+08
Tb927.8.5310	Polyketide cyclase / dehydrase and lipid transport, putative	2	Down-regulated	0.621382	0.00653779	23.8561	24.274	24.0058	23.42	23.2774	23.4063	1.51847e+07	2.02857e+07	1.6845e+07	1.12231e+07	1.01673e+07	1.11174e+07
Tb927.8.5420	methyltransferase domain containing protein, putative	4	Down-regulated	0.455642	0.0161507	25.1754	25.5428	25.4263	24.6374	23.699	24.2798	3.78914e+07	4.88806e+07	4.50895e+07	2.60967e+07	1.36175e+07	2.03675e+07
Tb927.8.550	peptide methionine sulfoxide reductase, putative	3	Down-regulated	0.553327	0.00866554	25.3107	25.7526	25.8584	24.8748	24.7134	24.8238	4.16165e+07	5.65353e+07	6.08333e+07	3.07656e+07	2.75087e+07	2.96963e+07
Tb927.8.6140	Galactose oxidase, central domain/Kelch motif containing protein, putative	2	Down-regulated	0.551873	0.00861279	25.7603	25.9378	25.5021	24.9825	25.0204	24.6255	5.68375e+07	6.42775e+07	4.75228e+07	3.31502e+07	3.40327e+07	2.58837e+07
Tb927.8.6480	folate-binding protein YgfZ, putative	4	Down-regulated	0.621338	0.0498383	24.112	23.9139	24.3426	23.8374	23.3183	23.0784	1.81318e+07	1.58057e+07	2.12744e+07	1.49893e+07	1.04591e+07	8.85692e+06
Tb927.8.6650	DRBD13	5	Down-regulated	0.635003	0.00449725	25.0309	25.3131	25.2331	24.6158	24.3852	24.6132	3.4281e+07	4.16861e+07	3.94391e+07	2.57087e+07	2.1912e+07	2.56625e+07
Tb927.8.7480	hypothetical protein, conserved	8	Down-regulated	0.617831	0.000227106	26.5723	26.6862	26.7296	26.0213	25.9224	25.9632	9.97863e+07	1.07979e+08	1.11282e+08	6.81059e+07	6.35928e+07	6.54185e+07
Tb927.8.8300	amino acid transporter, putative	6	Down-regulated	0.585226	0.00175618	28.3395	28.4358	28.5867	27.8234	27.5676	27.651	3.39654e+08	3.63091e+08	4.03126e+08	2.3751e+08	1.98921e+08	2.10754e+08
Tb927.8.940	Flagella connector protein 1	15	Down-regulated	0.39335	4.21884e-05	28.2149	28.2842	28.1911	26.9778	26.7607	26.9066	3.11562e+08	3.26887e+08	3.06452e+08	1.3217e+08	1.13702e+08	1.25804e+08
Tb927.9.10630	hypothetical protein, conserved	3	Down-regulated	0.638891	0.000428063	24.596	24.6795	24.7025	24.039	23.9133	24.0834	2.53583e+07	2.68694e+07	2.73024e+07	1.7237e+07	1.57986e+07	1.77756e+07
Tb927.9.10680	RNA polymerase III RPC4, putative	5	Down-regulated	0.523527	0.00813923	24.2777	24.7926	24.4028	23.7835	23.4622	23.4525	2.03384e+07	2.9062e+07	2.21801e+07	1.44394e+07	1.15562e+07	1.14788e+07
Tb927.9.11770	Fusaric acid resistance protein-like, putative	7	Down-regulated	0.653836	0.00654786	26.7318	26.9395	27.0979	26.4124	26.25	26.2859	1.1145e+08	1.28708e+08	1.43641e+08	8.93175e+07	7.98084e+07	8.18151e+07
Tb927.9.12360	RBP35	12	Down-regulated	0.539033	0.00195689	28.5114	28.819	28.8468	27.919	27.7232	27.8766	3.82646e+08	4.73581e+08	4.82792e+08	2.53775e+08	2.21568e+08	2.46432e+08
Tb927.9.12680	hypothetical protein, conserved	2	Down-regulated	0.193827	0.00124587	22.2336	22.8848	22.8936	20.6732	20.0246	20.2287	4.93164e+06	7.74469e+06	7.79247e+06	1.67209e+06	1.06662e+06	1.22869e+06
Tb927.9.13200	hypothetical protein	2	Down-regulated	0.461841	0.0052162	24.3381	24.8575	24.7131	23.4427	23.3592	23.777	2.12079e+07	3.03977e+07	2.75034e+07	1.14013e+07	1.07601e+07	1.43743e+07
Tb927.9.13580	hypothetical protein, conserved	8	Down-regulated	0.639372	0.00471166	27.0396	27.1231	27.0843	26.2141	26.593	26.4795	1.37955e+08	1.4617e+08	1.4229e+08	7.78436e+07	1.01227e+08	9.35672e+07
Tb927.9.15290	CHAT domain containing protein, putative	25	Down-regulated	0.551232	0.00055278	28.6915	28.8714	28.8729	28.0739	27.886	27.8977	4.33505e+08	4.91101e+08	4.91606e+08	2.8255e+08	2.48043e+08	2.50068e+08
Tb927.9.15460	calcium motive p-type ATPase, putative	27	Down-regulated	0.628423	9.95194e-05	29.7672	29.8739	29.8561	29.2165	29.1253	29.1455	9.13739e+08	9.83884e+08	9.71782e+08	6.23787e+08	5.85594e+08	5.9382e+08
Tb927.9.1810	60S ribosomal protein L35, putative	3	Down-regulated	0.402355	0.0221272	26.6308	27.1981	27.3102	25.1163	25.8442	26.1431	1.0391e+08	1.53972e+08	1.66414e+08	3.63721e+07	6.02393e+07	7.41058e+07
Tb927.9.2320	POMP1	7	Down-regulated	0.606063	0.00140601	28.0086	28.0562	28.125	27.4493	27.3924	27.168	2.70045e+08	2.79094e+08	2.92726e+08	1.8326e+08	1.76173e+08	1.5079e+08
Tb927.9.2760	EB1-like C-terminal motif containing protein, putative	6	Down-regulated	0.654476	0.00319063	26.9272	27.038	27.1555	26.5069	26.287	26.4907	1.27609e+08	1.37796e+08	1.49492e+08	9.53605e+07	8.18811e+07	9.42982e+07
Tb927.9.5410	hypothetical protein, conserved	4	Down-regulated	0.666311	0.0414678	23.0801	23.202	23.1944	22.1517	22.665	22.8238	8.86783e+06	9.64909e+06	9.59857e+06	4.65925e+06	6.65021e+06	7.42421e+06
Tb927.9.6720	Putative methyltransferase, putative	3	Down-regulated	0.6192	0.00880486	24.657	24.868	24.9679	23.9269	24.168	24.3144	2.64552e+07	3.06197e+07	3.28155e+07	1.59487e+07	1.88495e+07	2.0862e+07
Tb927.9.7470	purine nucleoside transporter	4	Down-regulated	0.472955	0.00180195	29.888	30.2337	30.3549	29.166	29.0526	29.0542	9.93569e+08	1.26259e+09	1.37322e+09	6.02322e+08	5.56797e+08	5.57413e+08
Tb927.9.7590	60S ribosomal protein L11, putative	5	Down-regulated	0.569049	0.00305332	30.0436	30.3483	30.3247	29.2768	29.4543	29.5515	1.10669e+09	1.36694e+09	1.34477e+09	6.50412e+08	7.35578e+08	7.86864e+08
Tb927.9.7980	hypothetical protein, conserved	2	Down-regulated	0.535924	0.0371123	24.4276	25.267	25.162	23.9405	24.0734	24.2606	2.25649e+07	4.03752e+07	3.75428e+07	1.60996e+07	1.76528e+07	2.00988e+07
Tb927.9.8190	hypothetical protein, conserved	8	Down-regulated	0.526427	0.00432183	26.7921	27.1443	27.298	26.2229	26.0759	26.1997	1.16209e+08	1.48333e+08	1.65009e+08	7.83228e+07	7.07348e+07	7.70695e+07
Tb927.9.9010	SAC3/GANP/Nin1/mts3/eIF-3 p25 family, putative	6	Down-regulated	0.604572	0.00250887	25.5937	25.897	25.7126	25.0823	24.8906	25.0612	5.06384e+07	6.24854e+07	5.49884e+07	3.55252e+07	3.11032e+07	3.50076e+07
Tb927.9.9030	hypothetical protein, conserved	2	Down-regulated	0.650591	0.0474631	25.6662	25.0876	25.4427	24.5121	24.9229	24.9213	5.32466e+07	3.56546e+07	4.5604e+07	2.39263e+07	3.18092e+07	3.17724e+07
Tb927.9.9080	Present in the outer mitochondrial membrane proteome 5	5	Down-regulated	0.642816	0.0023093	26.9008	27.1163	27.1241	26.4942	26.3045	26.4343	1.25296e+08	1.45483e+08	1.46275e+08	9.45276e+07	8.2881e+07	9.06799e+07
Tb927.9.9090	WD domain, G-beta repeat, putative	2	Down-regulated	0.636885	0.0321096	25.2891	25.4962	25.7143	25.1638	24.6365	24.7207	4.10008e+07	4.73276e+07	5.50515e+07	3.75879e+07	2.6081e+07	2.76476e+07
Tb927.9.9260	hypothetical protein, conserved	2	Down-regulated	0.623564	0.00486374	28.0972	28.2952	28.2413	27.3577	27.4928	27.7225	2.87153e+08	3.29386e+08	3.17302e+08	1.71981e+08	1.88864e+08	2.21465e+08
Tb927.9.9290	polyadenylate-binding protein 1	25	Down-regulated	0.596611	0.00153851	31.5629	31.8317	31.7296	31.0431	30.855	30.9968	3.17231e+09	3.82198e+09	3.561e+09	2.21256e+09	1.94209e+09	2.14275e+09
Tb927.9.9300	hypothetical protein, conserved	2	Down-regulated	0.411724	0.0124467	22.8638	22.9662	22.158	21.6109	21.4796	21.1435	7.63295e+06	8.19451e+06	4.67991e+06	3.2027e+06	2.92415e+06	2.31653e+06
Tb927.9.9310	hypothetical protein, conserved	6	Down-regulated	0.58257	0.000815048	25.647	25.7024	25.896	24.9538	25.0487	24.9129	5.25427e+07	5.45991e+07	6.24403e+07	3.2498e+07	3.47059e+07	3.15896e+07
Tb927.9.9520	ZC3H29	6	Down-regulated	0.641029	0.00264697	27.1589	27.3871	27.3762	26.674	26.5578	26.7692	1.49848e+08	1.75519e+08	1.74199e+08	1.07074e+08	9.87843e+07	1.14378e+08
Tb09.v4.0067	retrotransposon hot spot protein, pseudogene	5		0.757427	0.00540895	30.0177	30.2121	30.1785	29.7529	29.6579	29.7989	1.08701e+09	1.24382e+09	1.21517e+09	9.04713e+08	8.47085e+08	9.34039e+08
Tb11.01.2730.1-p1	hypothetical protein, conserved	4		1.46858	0.0163019	22.3006	22.4952	22.5483	23.2204	22.9342	22.8363	5.16598e+06	5.91196e+06	6.13362e+06	9.77344e+06	8.01455e+06	7.48863e+06
Tb11.02.5360	hypothetical protein, conserved	2		1.22911	0.0304909	22.7256	22.4737	22.5431	22.9842	22.8354	22.8218	6.93562e+06	5.82467e+06	6.11142e+06	8.2972e+06	7.48424e+06	7.41405e+06
Tb11.02.5390	Guide RNA binding complex protein 4	17		0.837969	0.0465622	27.5556	27.7525	27.7062	27.4897	27.2812	27.4762	1.97269e+08	2.26111e+08	2.18983e+08	1.88464e+08	1.63106e+08	1.8671e+08
Tb11.0890	epsin, putative	5		1.35347	0.0040516	26.3031	26.2042	26.3427	26.8279	26.6179	26.71	8.27986e+07	7.73149e+07	8.51014e+07	1.19122e+08	1.02988e+08	1.09781e+08
Tb11.1790.1-p1	retrotransposon hot spot protein (RHS, pseudogene), putative	22		0.755497	0.00105563	31.08	31.1942	31.1604	30.7916	30.6774	30.7522	2.26992e+09	2.45695e+09	2.4e+09	1.85867e+09	1.71714e+09	1.80852e+09
Tb11.v5.0178.1-p1	glutamine synthetase, putative	11		0.740101	0.0117146	30.9049	30.9708	30.9915	30.6999	30.3731	30.4733	2.01053e+09	2.10451e+09	2.1348e+09	1.74421e+09	1.39066e+09	1.49065e+09
Tb11.v5.0222.1-p1	NADH dehydrogenase [ubiquinone] flavoprotein 1, mitochondrial, putative	8		1.2942	0.0388352	26.6559	26.8241	26.8009	27.3264	27.0989	26.9528	1.05737e+08	1.18814e+08	1.16919e+08	1.68289e+08	1.43742e+08	1.29901e+08
Tb11.v5.0252.1-p1	RNA binding protein, putative	4		1.28575	0.0168761	25.5627	25.5467	25.4719	26.0574	25.7926	25.805	4.95606e+07	4.90128e+07	4.65375e+07	6.98315e+07	5.81217e+07	5.8623e+07
Tb11.v5.0480.1-p1	DNA-directed RNA polymerase, alpha subunit, putative	13		0.783265	0.010631	29.1082	29.1431	29.161	28.8965	28.6344	28.8122	5.78677e+08	5.92834e+08	6.00254e+08	4.99707e+08	4.16703e+08	4.71351e+08
Tb11.v5.0519.1-p1	hypothetical protein, conserved	5		0.752463	0.0318368	27.3287	27.2633	27.2485	26.8253	27.0952	26.656	1.68556e+08	1.6109e+08	1.5945e+08	1.18909e+08	1.43377e+08	1.05741e+08
Tb11.v5.0580.1-p1	delta-6 fatty acid desaturase, putative	10		0.844295	0.0252328	29.4122	29.5152	29.6414	29.3218	29.2608	29.2619	7.14407e+08	7.67309e+08	8.37416e+08	6.71022e+08	6.43252e+08	6.43756e+08
Tb11.v5.0589.1-p1	Clusterin-associated protein-1, putative	4		1.32025	0.036543	27.4873	27.2622	27.3285	27.9415	27.7603	27.5633	1.88147e+08	1.60968e+08	1.68543e+08	2.57767e+08	2.27348e+08	1.9832e+08
Tb11.v5.0594.1-p1	retrotransposon hot spot (RHS) protein, putative	12		0.765033	0.0232707	30.2551	30.4826	30.5572	30.0858	29.9372	30.1229	1.28138e+09	1.50028e+09	1.57987e+09	1.1395e+09	1.02798e+09	1.16925e+09
Tb11.v5.0601.1-p1	major surface protease gp63, putative	13		0.674301	0.00249704	28.2944	28.5564	28.4515	27.9342	27.8165	27.8555	3.29202e+08	3.94765e+08	3.67074e+08	2.56461e+08	2.36376e+08	2.42853e+08
Tb11.v5.0655.1-p1	trypanosome RHS family, putative	16		0.85687	0.0304838	30.6479	30.8257	30.8126	30.5438	30.4769	30.601	1.68248e+09	1.90309e+09	1.88589e+09	1.56532e+09	1.49435e+09	1.62867e+09
Tb11.v5.0667.1-p1	poly(A) polymerase, putative	4		0.829348	0.018522	24.2581	24.4481	24.4485	24.0843	24.1754	24.0917	2.00638e+07	2.28888e+07	2.28942e+07	1.77864e+07	1.89458e+07	1.78776e+07
Tb11.v5.0668.1-p1	protein disulfide isomerase	13		1.35374	0.00793672	31.1409	31.3651	31.3664	31.7864	31.6334	31.7701	2.36777e+09	2.76597e+09	2.7683e+09	3.7039e+09	3.33119e+09	3.66218e+09
Tb11.v5.0670.1-p1	retrotransposon hot spot (RHS) protein, putative	6		0.789207	0.0381814	29.0877	29.1723	29.1098	28.9937	28.6277	28.6984	5.70516e+08	6.04957e+08	5.79311e+08	5.34521e+08	4.14771e+08	4.35596e+08
Tb11.v5.0707.1-p1	hypothetical protein, conserved	9		1.20479	0.028339	28.3595	28.587	28.513	28.8426	28.6922	28.736	3.44388e+08	4.03211e+08	3.83061e+08	4.81391e+08	4.33712e+08	4.47107e+08
Tb927.1.1270	homocysteine S-methyltransferase, putative	9		0.732542	0.00857795	28.2247	28.4421	28.4566	28.0332	27.8492	27.8991	3.13669e+08	3.64698e+08	3.68363e+08	2.74677e+08	2.41789e+08	2.50307e+08
Tb927.1.1540	Tubulin/FtsZ family, putative	7		1.39738	0.0141769	26.024	25.9936	25.8905	26.6592	26.3408	26.3353	6.82364e+07	6.68104e+07	6.22039e+07	1.05978e+08	8.49893e+07	8.4667e+07
Tb927.1.1670	ARM-like helical domain-containing protein	27		0.829073	0.0196623	30.2301	30.3161	30.2881	30.1264	29.8914	29.9968	1.25938e+09	1.33677e+09	1.31103e+09	1.17208e+09	9.95887e+08	1.07137e+09
Tb927.1.1770	Dithiol glutaredoxin 2	2		0.818522	0.039348	25.2196	25.1461	25.3615	25.072	24.8221	24.9639	3.90703e+07	3.71301e+07	4.31103e+07	3.52717e+07	2.96622e+07	3.27245e+07
Tb927.1.190	retrotransposon hot spot protein (RHS, pseudogene), putative	22		0.776468	0.00991425	31.2857	31.371	31.4915	31.0804	30.9159	31.0589	2.61776e+09	2.77715e+09	3.01922e+09	2.2705e+09	2.02582e+09	2.23698e+09
Tb927.1.1930	phosphatidylinositol 3-kinase, putative	27		0.773151	0.0222891	28.0039	28.2946	28.1506	27.8828	27.6837	27.7768	2.69171e+08	3.29241e+08	2.97972e+08	2.47499e+08	2.15587e+08	2.29954e+08
Tb927.1.2100	Calpain-like protein 1.1	29		0.678293	0.00219255	29.9158	30.1509	30.1119	29.5313	29.4379	29.5381	1.0129e+09	1.19216e+09	1.16038e+09	7.75877e+08	7.27287e+08	7.79586e+08
Tb927.1.2230	small myristoylated protein 1-1	3		0.764482	0.0240879	29.6754	29.9947	29.899	29.4497	29.3955	29.5742	8.57432e+08	1.06981e+09	1.00115e+09	7.33229e+08	7.06182e+08	7.99294e+08
Tb927.1.2260	small myristoylated protein 1-2	3		0.795944	0.0320169	29.2523	29.571	29.4544	29.0942	29.0403	29.1702	6.39463e+08	7.97552e+08	7.35608e+08	5.73113e+08	5.5206e+08	6.04112e+08
Tb927.1.2580	exosome-associated protein 1	3		0.75356	0.00236625	26.1356	26.3149	26.2418	25.7762	25.8206	25.8747	7.37217e+07	8.34757e+07	7.9354e+07	5.74667e+07	5.92615e+07	6.15274e+07
Tb927.1.2750	hypothetical protein, conserved	11		0.717569	0.00871803	28.8748	29.1552	29.1366	28.6302	28.5014	28.6118	4.92252e+08	5.97866e+08	5.90172e+08	4.15491e+08	3.80007e+08	4.10226e+08
Tb927.1.3010	PAMC4	7		0.759805	0.0115346	28.0623	28.2881	28.11	27.6443	27.8252	27.8052	2.80275e+08	3.27777e+08	2.89697e+08	2.09774e+08	2.37812e+08	2.34529e+08
Tb927.1.3070	hypothetical protein, conserved	7		0.802143	0.0112862	26.294	26.4204	26.3001	26.1354	25.9464	25.9747	8.22758e+07	8.98118e+07	8.26263e+07	7.37136e+07	6.46598e+07	6.59436e+07
Tb927.1.3250	Domain of unknown function (DUF4456), putative	14		1.26475	0.00209344	26.6399	26.6968	26.6717	27.0948	26.9483	26.9782	1.04567e+08	1.08774e+08	1.06905e+08	1.43337e+08	1.29491e+08	1.32205e+08
Tb927.1.3300	Myotubularin-related protein, putative	7		0.821652	0.0388196	26.5058	26.7755	26.593	26.3587	26.2556	26.4185	9.52866e+07	1.14877e+08	1.01229e+08	8.60503e+07	8.01156e+07	8.96906e+07
Tb927.1.3950	alanine aminotransferase	15		1.20466	0.0429993	30.303	30.4234	30.431	30.8051	30.5327	30.6155	1.32472e+09	1.44001e+09	1.44763e+09	1.8761e+09	1.55329e+09	1.64506e+09
Tb927.1.420	retrotransposon hot spot protein 5 (RHS5), putative	18		0.79954	0.00923274	31.4871	31.5461	31.5457	31.3309	31.1142	31.157	3.00992e+09	3.13565e+09	3.13467e+09	2.70117e+09	2.32444e+09	2.39431e+09
Tb927.1.4410	SUMO-interacting motif-containing protein	7		1.41117	0.0408428	24.8244	25.1437	24.9523	25.7331	25.3017	25.3548	2.97081e+07	3.70686e+07	3.2463e+07	5.57749e+07	4.1359e+07	4.291e+07
Tb927.1.4680	Kinetochore interacting protein 6	7		1.33328	0.0458582	25.6516	25.553	25.4484	26.2075	25.7788	25.8834	5.27099e+07	4.92276e+07	4.57871e+07	7.74887e+07	5.75704e+07	6.18997e+07
Tb927.1.4720	SET domain containing protein, putative	6		0.705593	0.000247749	25.5434	25.5562	25.4794	25.0671	25.0437	24.958	4.89034e+07	4.93395e+07	4.6781e+07	3.51513e+07	3.45857e+07	3.2591e+07
Tb927.1.4740	FAM91 N-terminus/FAM91 C-terminus, putative	4		0.784532	0.038796	23.6938	23.8573	23.8797	23.3574	23.35	23.6582	1.35693e+07	1.51972e+07	1.54345e+07	1.07469e+07	1.0692e+07	1.32381e+07
Tb927.1.640	BRCA2	7		1.27644	0.0281865	25.6327	25.5874	25.7389	26.1812	25.8721	25.948	5.20239e+07	5.04176e+07	5.59986e+07	7.60899e+07	6.14161e+07	6.47327e+07
Tb927.1.790	hypothetical transmembrane protein, conserved	5		1.38795	0.0304767	24.8527	25.0824	24.8008	25.5797	25.3786	25.1853	3.02983e+07	3.55275e+07	2.92261e+07	5.015e+07	4.36239e+07	3.81532e+07
Tb927.1.840	transmembrane protein, putative	2		0.801976	0.0313986	26.3394	26.4861	26.5102	26.1849	25.9596	26.2279	8.4911e+07	9.39944e+07	9.55769e+07	7.6284e+07	6.52536e+07	7.85907e+07
Tb927.1.90	retrotransposon hot spot protein (RHS, pseudogene), putative	10		0.808962	0.00229416	30.0706	30.0941	30.1114	29.773	29.7176	29.8644	1.12758e+09	1.1461e+09	1.15991e+09	9.17405e+08	8.82843e+08	9.77398e+08
Tb927.10.10030	hypothetical protein, conserved	3		1.25	0.0214476	27.9967	27.9452	27.9965	28.4656	28.2023	28.2216	2.67831e+08	2.58425e+08	2.67776e+08	3.70693e+08	3.08843e+08	3.13007e+08
Tb927.10.10080	hypothetical protein, conserved	3		1.24762	0.0233813	26.1666	26.3923	26.295	26.7048	26.4936	26.6142	7.53235e+07	8.80775e+07	8.23351e+07	1.09378e+08	9.44836e+07	1.02724e+08
Tb927.10.10140	paraflagellar rod component, putative	10		1.21592	0.0410454	30.8226	30.761	30.716	31.2177	30.9333	30.9803	1.89895e+09	1.81967e+09	1.76377e+09	2.49728e+09	2.05048e+09	2.1184e+09
Tb927.10.10160	Kinetoplast polyadenylation factor 4	5		1.14328	0.0202336	26.9144	26.9319	26.7719	27.0735	27.0856	27.0436	1.26487e+08	1.28028e+08	1.14589e+08	1.41236e+08	1.42417e+08	1.38336e+08
Tb927.10.10170	pre-mRNA splicing factor 46, putative	4		0.673585	0.00362668	25.4315	25.3681	25.4818	24.6901	24.8746	24.9928	4.52531e+07	4.33082e+07	4.68592e+07	2.70685e+07	3.07616e+07	3.3387e+07
Tb927.10.10310	hypothetical protein, conserved	3		0.798658	0.0480935	24.5694	24.8684	24.8782	24.5484	24.3748	24.4352	2.48954e+07	3.06295e+07	3.08388e+07	2.45364e+07	2.17548e+07	2.26839e+07
Tb927.10.10330	Anaphase-promoting complex subunit CDC27	4		0.865106	0.0284562	27.5737	27.763	27.6188	27.4054	27.4869	27.4418	1.99767e+08	2.27768e+08	2.06102e+08	1.77762e+08	1.881e+08	1.82302e+08
Tb927.10.10370	hypothetical protein, conserved	6		1.4651	0.0330944	26.5658	26.4053	26.4165	27.307	26.9076	26.7777	9.93372e+07	8.88763e+07	8.95702e+07	1.66046e+08	1.25887e+08	1.15049e+08
Tb927.10.10445	Core histone H2A/H2B/H3/H4, putative	6		0.848482	0.0355766	35.1012	35.2999	35.2446	35.006	34.8872	35.0439	3.68561e+10	4.22986e+10	4.07078e+10	3.45032e+10	3.17755e+10	3.54224e+10
Tb927.10.10630	hypothetical protein, conserved	4		1.17873	0.0104173	25.9329	25.8323	25.8663	26.1426	26.0295	26.169	6.40585e+07	5.97438e+07	6.11676e+07	7.40818e+07	6.84965e+07	7.54508e+07
Tb927.10.10840	Enriched in surface-labeled proteome protein 15	2		1.21276	0.0110162	23.6377	23.502	23.4231	23.796	23.8007	23.8092	1.3051e+07	1.18798e+07	1.12476e+07	1.45647e+07	1.46125e+07	1.46985e+07
Tb927.10.11170	hypothetical protein, conserved	11		1.27196	0.0138511	26.6553	26.5526	26.4375	26.9925	26.8914	26.8048	1.05695e+08	9.84317e+07	9.08795e+07	1.3352e+08	1.24485e+08	1.17233e+08
Tb927.10.11380	hypothetical protein, conserved	8		0.83479	0.036119	27.7273	27.973	27.9749	27.6281	27.6302	27.6491	2.22207e+08	2.63461e+08	2.63814e+08	2.07439e+08	2.07744e+08	2.10477e+08
Tb927.10.11400	WD domain, G-beta repeat, putative	2		1.20921	0.00771098	24.313	24.1674	24.1833	24.4439	24.5504	24.4942	2.08424e+07	1.88413e+07	1.905e+07	2.28213e+07	2.45694e+07	2.36309e+07
Tb927.10.11590	nicotinate phosphoribosyltransferase, putative	6		1.20679	0.0302897	25.4725	25.6342	25.5685	25.9598	25.7393	25.7847	4.65571e+07	5.20779e+07	4.97613e+07	6.52637e+07	5.6013e+07	5.78071e+07
Tb927.10.11600	hypothetical protein, conserved	4		0.807434	0.0275386	26.0689	26.3701	26.1733	25.9228	25.874	25.9057	7.03913e+07	8.67366e+07	7.56734e+07	6.36124e+07	6.14949e+07	6.28644e+07
Tb927.10.11700	guanylate kinase, putative	7		0.756038	0.0213342	28.8638	29.1724	29.0855	28.7409	28.5381	28.6424	4.88516e+08	6.05008e+08	5.69644e+08	4.48613e+08	3.89797e+08	4.19009e+08
Tb927.10.11730	ZC3H33	2		1.21427	0.0333994	23.7914	23.9875	23.7283	24.1723	24.0346	24.1495	1.45183e+07	1.66321e+07	1.38968e+07	1.89049e+07	1.71848e+07	1.86097e+07
Tb927.10.11810	hypothetical protein, conserved	3		1.47734	0.0232173	23.9433	23.7422	23.573	24.4995	24.1039	24.3408	1.61307e+07	1.40323e+07	1.24786e+07	2.3718e+07	1.80301e+07	2.12478e+07
Tb927.10.11970	glutamine aminotransferase (GlnAT)	12		0.750175	0.0089537	30.7818	30.9496	30.8247	30.5608	30.3123	30.4335	1.8461e+09	2.07378e+09	1.90181e+09	1.58389e+09	1.33327e+09	1.45013e+09
Tb927.10.1210	katanin, putative	16		1.44931	0.00232222	28.2529	28.2323	28.1619	28.8812	28.6335	28.7291	3.19863e+08	3.15327e+08	3.00309e+08	4.94436e+08	4.16418e+08	4.44972e+08
Tb927.10.12260	cytosolic nonspecific dipeptidase, putative	14		0.783794	0.0138037	32.9388	33.1527	33.0967	32.7552	32.6051	32.776	8.23302e+09	9.54919e+09	9.18564e+09	7.24942e+09	6.53312e+09	7.35471e+09
Tb927.10.12680	60S ribosomal protein L34, putative	3		0.786466	0.0282954	31.0429	31.2623	31.2719	30.9317	30.7056	30.9013	2.21232e+09	2.57565e+09	2.59282e+09	2.04822e+09	1.75105e+09	2.00547e+09
Tb927.10.12860	pre-RNA processing PIH1/Nop17, putative	11		1.24463	0.0100193	27.0477	27.2299	27.1877	27.5518	27.4142	27.4492	1.38733e+08	1.574e+08	1.52871e+08	1.96745e+08	1.78852e+08	1.83244e+08
Tb927.10.12890	bifunctional aminoacyl-tRNA synthetase, putative	27		0.743144	0.00245195	32.3779	32.5075	32.4324	32.0956	31.92	32.015	5.58118e+09	6.10578e+09	5.79586e+09	4.58932e+09	4.06315e+09	4.33978e+09
Tb927.10.12940	predicted zinc finger protein	3		0.84471	0.0345516	27.6168	27.7364	27.6476	27.4894	27.2823	27.4914	2.05814e+08	2.23603e+08	2.10267e+08	1.88427e+08	1.63232e+08	1.88688e+08
Tb927.10.13040	procyclic-enriched flagellar receptor adenylate cyclase 4	12		0.84297	0.0497888	28.2319	28.4389	28.4342	28.1001	28.0393	28.2293	3.15249e+08	3.63895e+08	3.62693e+08	2.8772e+08	2.75845e+08	3.14671e+08
Tb927.10.13130	UTP-glucose-1-phosphate uridylyltransferase	8		1.26057	0.00531973	26.1059	26.2502	26.1284	26.544	26.4142	26.5293	7.22227e+07	7.98174e+07	7.33569e+07	9.78466e+07	8.94278e+07	9.68541e+07
Tb927.10.13480	CAMK/CAMKL family protein kinase, putative	2		0.688173	0.0486301	23.3846	23.2936	23.3686	22.6094	22.5537	23.1811	1.09517e+07	1.02822e+07	1.08308e+07	6.39903e+06	6.15655e+06	9.51047e+06
Tb927.10.13630	glucosidase, putative	18		1.22325	0.0187999	29.1029	29.1466	29.249	29.5702	29.3565	29.4398	5.7658e+08	5.94288e+08	6.37992e+08	7.97116e+08	6.87357e+08	7.28222e+08
Tb927.10.13800	hypothetical protein, conserved	14		0.790854	0.0251045	28.8054	28.9606	28.8368	28.6953	28.4191	28.4621	4.69117e+08	5.22422e+08	4.79465e+08	4.34647e+08	3.5893e+08	3.69772e+08
Tb927.10.13880	hypothetical protein, conserved	10		1.23911	0.0244594	26.3912	26.6449	26.5288	26.9246	26.7549	26.8194	8.80113e+07	1.04934e+08	9.68171e+07	1.27382e+08	1.13244e+08	1.18421e+08
Tb927.10.13960	paralyzed flagella protein 20	8		1.48124	0.0112109	25.6088	25.7674	25.6185	26.453	26.0967	26.1231	5.1171e+07	5.71163e+07	5.15166e+07	9.18618e+07	7.17609e+07	7.30856e+07
Tb927.10.14040	vacuolar ATP synthase subunit c, putative	10		0.813079	0.0155926	28.6217	28.7633	28.6927	28.5088	28.2971	28.3716	4.13051e+08	4.55622e+08	4.33873e+08	3.81954e+08	3.29818e+08	3.47301e+08
Tb927.10.1410	hypothetical protein, conserved	3		0.719179	0.0259011	24.1979	24.3512	24.6469	23.9768	23.889	23.9388	1.92441e+07	2.14017e+07	2.62695e+07	1.65092e+07	1.55344e+07	1.60806e+07
Tb927.10.14150	EnigmRBP1	19		0.758406	0.00606855	30.1988	30.3694	30.3449	30.0094	29.8344	29.8724	1.23241e+09	1.38712e+09	1.36373e+09	1.08073e+09	9.57326e+08	9.82876e+08
Tb927.10.14160	Aquaglyceroporin 3	4		1.31763	0.0459337	26.8881	27.2206	27.2714	27.6336	27.5715	27.3867	1.242e+08	1.56389e+08	1.61996e+08	2.08236e+08	1.99455e+08	1.75472e+08
Tb927.10.14260	AP-4 complex subunit sigma-1, putative	2		0.695021	0.04673	23.8945	24.2146	24.2449	23.6415	23.3041	23.8137	1.55943e+07	1.94685e+07	1.98813e+07	1.30857e+07	1.03568e+07	1.47448e+07
Tb927.10.14360	U2 small nuclear ribonucleoprotein 40K	3		1.15758	0.0341765	25.0149	25.1266	25.0669	25.3947	25.2202	25.2218	3.39017e+07	3.66311e+07	3.51475e+07	4.41139e+07	3.90884e+07	3.91316e+07
Tb927.10.14470	intraflagellar transport protein 140	20		1.21573	0.0196281	28.229	28.2292	28.273	28.6648	28.4303	28.4708	3.14603e+08	3.14645e+08	3.24353e+08	4.25573e+08	3.61719e+08	3.72026e+08
Tb927.10.14480	hypothetical protein, conserved	2		1.46132	0.0043784	24.6685	24.5717	24.7499	25.1458	25.1146	25.364	2.66663e+07	2.49356e+07	2.8214e+07	3.71238e+07	3.63295e+07	4.31835e+07
Tb927.10.14510	root hair defective 3 GTP-binding protein (RHD3), putative	12		1.262	0.0309291	26.9153	27.1689	27.1603	27.5355	27.3963	27.326	1.26562e+08	1.50891e+08	1.49989e+08	1.94535e+08	1.76644e+08	1.68251e+08
Tb927.10.14550	ATP-dependent RNA helicase HEL67	23		0.793373	0.0436479	32.2859	32.585	32.5555	32.1999	32.0216	32.2138	5.23629e+09	6.44269e+09	6.31231e+09	4.93319e+09	4.35974e+09	4.98087e+09
Tb927.10.14580	60S ribosomal protein L17, putative	5		0.89961	0.037366	32.1957	32.1236	32.1551	32.0907	31.9359	31.9865	4.91888e+09	4.67923e+09	4.78259e+09	4.57372e+09	4.10833e+09	4.25497e+09
Tb927.10.14780	Canertinib-binding protein kinase 1	14		1.36624	0.0098221	29.9738	30.0816	30.1257	30.6646	30.3718	30.4843	1.05439e+09	1.13623e+09	1.17148e+09	1.70204e+09	1.38938e+09	1.50203e+09
Tb927.10.14800	mitogen-activated protein kinase 9, putative	7		1.35941	0.00942791	26.612	26.7835	26.6328	27.263	27.0011	27.0868	1.02565e+08	1.15518e+08	1.04056e+08	1.61055e+08	1.34323e+08	1.4254e+08
Tb927.10.1490	Temperature dependent protein affecting M2 dsRNA replication, putative	25		0.737816	0.00470551	29.551	29.5857	29.6391	29.284	29.0316	29.1344	7.8658e+08	8.05695e+08	8.361e+08	6.5368e+08	5.48742e+08	5.89274e+08
Tb927.10.1510	CCR4-NOT transcription complex subunit 1	72		0.755465	0.00646626	32.1687	32.3281	32.2962	31.96	31.7502	31.8665	4.82781e+09	5.3919e+09	5.27388e+09	4.1774e+09	3.61203e+09	3.91544e+09
Tb927.10.15310	hypothetical protein, conserved	8		0.718947	0.0187723	28.1425	28.4168	28.4538	27.8128	27.7667	28.0131	2.96304e+08	3.58361e+08	3.67671e+08	2.35771e+08	2.28349e+08	2.70885e+08
Tb927.10.15350	histone H3 variant V	6		0.820621	0.0075507	30.2193	30.2872	30.1792	29.9839	29.9966	29.847	1.25003e+09	1.31029e+09	1.21577e+09	1.06185e+09	1.07121e+09	9.65674e+08
Tb927.10.15650	Mitochondrial SSU ribosomal protein, putative	3		0.825825	0.00483663	25.2814	25.2656	25.3603	25.104	24.9811	24.9925	4.07801e+07	4.03362e+07	4.30744e+07	3.60627e+07	3.31174e+07	3.33798e+07
Tb927.10.15870	RNA binding protein, putative	2		0.750678	0.0273069	25.1206	25.0873	25.2035	24.5033	24.7228	24.917	3.64793e+07	3.56476e+07	3.86369e+07	2.3781e+07	2.76892e+07	3.16778e+07
Tb927.10.16100	FK506-binding protein (FKBP)-type peptidyl-prolyl isomerase, putative	13		1.49217	0.00360888	30.2878	30.5694	30.5291	31.0305	30.9891	31.112	1.31082e+09	1.59338e+09	1.54945e+09	2.19335e+09	2.13136e+09	2.32088e+09
Tb927.10.1990	major vault protein, putative	16		0.870571	0.00563678	27.7414	27.6828	27.6539	27.5052	27.4419	27.531	2.2438e+08	2.15452e+08	2.11175e+08	1.90495e+08	1.82314e+08	1.93938e+08
Tb927.10.2070	hypothetical protein, conserved	2		0.77965	0.0298661	24.6056	24.5304	24.6283	24.0567	24.1859	24.4221	2.55281e+07	2.4232e+07	2.59331e+07	1.74498e+07	1.90851e+07	2.24792e+07
Tb927.10.2210	Peptidase C19, ubiquitin carboxyl-terminal hydrolase, putative	6		0.776869	0.0143106	26.4902	26.7218	26.6201	26.1425	26.2633	26.3362	9.42626e+07	1.10676e+08	1.03147e+08	7.4076e+07	8.0546e+07	8.47201e+07
Tb927.10.2290	chaperone protein DnaJ, putative	7		0.74301	0.0267225	25.842	26.1938	26.1286	25.6952	25.5116	25.6883	6.01493e+07	7.67591e+07	7.33633e+07	5.43283e+07	4.78351e+07	5.40706e+07
Tb927.10.2300	hypothetical protein, conserved	2		1.36025	0.0125546	23.551	23.8972	23.8045	24.212	24.2227	24.1711	1.22904e+07	1.56236e+07	1.46512e+07	1.94324e+07	1.95779e+07	1.88891e+07
Tb927.10.2350	pyruvate dehydrogenase complex E3 binding protein, putative	9		0.851447	0.0231816	29.1652	29.3748	29.3137	29.0331	29.0848	29.0473	6.01996e+08	6.96137e+08	6.67294e+08	5.49337e+08	5.69359e+08	5.54761e+08
Tb927.10.2590	methyltransferase domain containing protein, putative	2		0.747061	0.0175385	23.0155	23.0791	23.1512	22.686	22.4648	22.8147	8.47947e+06	8.86128e+06	9.31528e+06	6.7477e+06	5.7886e+06	7.37737e+06
Tb927.10.2660	hypothetical protein, conserved	3		0.681011	0.0141039	24.746	24.8161	24.9378	24.0965	24.207	24.5081	2.81371e+07	2.95377e+07	3.21387e+07	1.79382e+07	1.93656e+07	2.38602e+07
Tb927.10.2750	deoxyhypusine synthase	5		0.895894	0.0209459	25.6466	25.7884	25.7161	25.5766	25.5365	25.5654	5.25293e+07	5.79553e+07	5.51226e+07	5.00418e+07	4.86706e+07	4.9654e+07
Tb927.10.2770	eukaryotic translation initiation factor 5, putative	23		0.870272	0.0272228	30.1422	30.2422	30.1966	30.0937	29.9244	29.9576	1.18499e+09	1.26997e+09	1.23048e+09	1.14578e+09	1.01889e+09	1.04267e+09
Tb927.10.2860	POC1 centriolar protein homolog	5		1.32181	0.0194106	23.8979	23.5935	23.7659	24.2786	24.1111	24.0834	1.56314e+07	1.26578e+07	1.42638e+07	2.0351e+07	1.812e+07	1.77761e+07
Tb927.10.2900	importin beta-1 subunit, putative	15		0.760546	0.0117166	29.3718	29.4625	29.4285	29.1889	28.8972	28.9777	6.94717e+08	7.39775e+08	7.22553e+08	6.11957e+08	4.99934e+08	5.28641e+08
Tb927.10.2950	hypothetical protein, conserved	12		1.20273	0.0147276	27.643	27.5886	27.5334	27.9364	27.7463	27.8768	2.09588e+08	2.01831e+08	1.94254e+08	2.56851e+08	2.25147e+08	2.46463e+08
Tb927.10.3010	hook complex protein, conserved	13		1.26459	0.013348	26.0809	26.1335	26.1198	26.601	26.3684	26.3687	7.09795e+07	7.36163e+07	7.2919e+07	1.01786e+08	8.663e+07	8.66504e+07
Tb927.10.3200	U2 splicing auxiliary factor, putative	6		1.24906	0.0340967	29.0063	29.1199	29.0767	29.5695	29.2686	29.3108	5.39221e+08	5.83391e+08	5.66181e+08	7.96726e+08	6.46748e+08	6.6593e+08
Tb927.10.3210	delta-1-pyrroline-5-carboxylate dehydrogenase, putative	23		0.888498	0.0318325	34.0099	34.0715	34.0596	33.9718	33.8068	33.8463	1.72985e+10	1.80522e+10	1.79043e+10	1.6847e+10	1.50266e+10	1.54433e+10
Tb927.10.3270	hypothetical protein, conserved	2		0.78948	0.0415453	25.4873	25.792	25.7746	25.2827	25.3011	25.4602	4.70387e+07	5.81001e+07	5.74008e+07	4.08188e+07	4.13409e+07	4.61621e+07
Tb927.10.3350	major facilitator superfamily, putative	3		1.25604	0.0268674	24.7796	25.0685	24.8863	25.1882	25.3402	25.2027	2.8801e+07	3.51851e+07	3.10125e+07	3.823e+07	4.24765e+07	3.86156e+07
Tb927.10.3610	hypothetical protein, conserved	2		0.763181	0.0429739	23.9148	24.0507	24.1132	23.7112	23.3872	23.7872	1.58156e+07	1.73771e+07	1.81461e+07	1.37332e+07	1.09709e+07	1.44768e+07
Tb927.10.3660	aspartate aminotransferase	16		1.21057	0.0415302	30.5772	30.6802	30.6082	30.9632	30.7213	30.9949	1.60201e+09	1.72051e+09	1.63678e+09	2.0934e+09	1.77026e+09	2.13993e+09
Tb927.10.3700	AMP-activated protein kinase, gamma regulatory subunit	5		0.818554	0.00753896	27.0749	27.2011	27.1922	26.9474	26.8108	26.8433	1.41368e+08	1.54296e+08	1.53343e+08	1.2941e+08	1.1772e+08	1.20407e+08
Tb927.10.3840	60S ribosomal protein L18a, putative	7		0.768329	0.0456201	32.5151	32.6667	32.5446	32.4404	32.0407	32.0742	6.13779e+09	6.81809e+09	6.2646e+09	5.82816e+09	4.41792e+09	4.52157e+09
Tb927.10.3990	DHH1	20		0.775661	0.00987516	32.8372	32.9419	32.9382	32.6647	32.4149	32.5298	7.67316e+09	8.25101e+09	8.22975e+09	6.80847e+09	5.72609e+09	6.20068e+09
Tb927.10.4000	methylglutaconyl-CoA hydratase, mitochondrial precursor, putative	8		1.28386	0.0162132	28.5037	28.4775	28.3493	28.9527	28.7149	28.7368	3.80601e+08	3.7374e+08	3.4196e+08	5.19555e+08	4.40596e+08	4.47346e+08
Tb927.10.4040	3-keto-dihydrosphingosine reductase	12		1.22333	0.0318105	28.6052	28.7858	28.8059	29.0755	28.8971	29.0968	4.08334e+08	4.62793e+08	4.693e+08	5.65734e+08	4.99928e+08	5.74122e+08
Tb927.10.4240	hypothetical protein, conserved	6		0.748655	0.012776	28.9556	29.0912	29.2571	28.7449	28.6076	28.7108	5.20595e+08	5.71911e+08	6.41593e+08	4.49871e+08	4.09027e+08	4.39343e+08
Tb927.10.4330	2-oxoisovalerate dehydrogenase beta subunit, mitochondrial precursor, putative	7		0.815269	0.0306212	27.7954	27.7412	27.7899	27.6492	27.3479	27.4291	2.32949e+08	2.24359e+08	2.32062e+08	2.10489e+08	1.70825e+08	1.80707e+08
Tb927.10.4440	predicted SAP domain protein	3		1.46707	0.0165237	21.9893	22.2566	21.8399	22.6735	22.6443	22.4478	4.1633e+06	5.01085e+06	3.75374e+06	6.68967e+06	6.5556e+06	5.72082e+06
Tb927.10.4460	leucine carboxyl methyltransferase, putative	5		1.18349	0.0204568	26.1161	26.1956	26.1634	26.5202	26.339	26.3385	7.27335e+07	7.68554e+07	7.51552e+07	9.62413e+07	8.4883e+07	8.48574e+07
Tb927.10.4850	hypothetical protein, conserved	7		1.33657	0.00648574	26.0677	26.2322	26.2209	26.7118	26.5372	26.5255	7.03354e+07	7.88262e+07	7.82118e+07	1.09917e+08	9.73833e+07	9.66017e+07
Tb927.10.520	Mitochondrial ATP synthase subunit, putative	12		0.7886	0.0106829	29.7121	29.8966	29.8892	29.5507	29.4015	29.521	8.79478e+08	9.99484e+08	9.94379e+08	7.86418e+08	7.09128e+08	7.70371e+08
Tb927.10.5230	ADP-ribosylation factor-like protein 13, putative	6		1.41436	0.0303176	24.3616	24.3277	24.1301	24.9931	24.7627	24.539	2.15561e+07	2.1055e+07	1.8361e+07	3.33951e+07	2.84643e+07	2.43769e+07
Tb927.10.5350	dynein heavy chain, putative	49		1.1829	0.042704	29.1521	29.2278	29.2288	29.5959	29.3588	29.3696	5.96581e+08	6.28688e+08	6.29125e+08	8.11443e+08	6.88469e+08	6.93657e+08
Tb927.10.540	ATP-dependent RNA helicase SUB2, putative	15		0.805373	0.00923343	31.1721	31.2027	31.2545	31.0042	30.7885	30.893	2.41961e+09	2.47146e+09	2.56181e+09	2.15379e+09	1.85462e+09	1.99393e+09
Tb927.10.5400	hypothetical protein, conserved	9		0.829204	0.0149499	28.1622	28.317	28.3755	28.0453	28.013	27.9937	3.00378e+08	3.34398e+08	3.48244e+08	2.76992e+08	2.70871e+08	2.67261e+08
Tb927.10.5520	AmmeMemoRadiSam system protein B, putative	10		1.22788	0.0165176	27.8474	27.8002	27.841	28.241	27.9917	28.1341	2.41497e+08	2.33722e+08	2.40427e+08	3.17247e+08	2.66901e+08	2.94583e+08
Tb927.10.5540	hypothetical protein, conserved	3		1.13406	0.0359386	27.0797	27.0644	27.1573	27.3815	27.2309	27.2299	1.41841e+08	1.40349e+08	1.49679e+08	1.74849e+08	1.57515e+08	1.574e+08
Tb927.10.5620	fructose-bisphosphate aldolase, glycosomal	20		0.777607	0.00598546	33.9968	34.0295	34.0961	33.7942	33.5847	33.6486	1.71417e+10	1.7535e+10	1.83637e+10	1.48962e+10	1.28827e+10	1.34656e+10
Tb927.10.5780	amino acid tansporter, putative	3		1.25969	0.0367647	24.4282	24.3201	24.3887	24.8046	24.8094	24.5036	2.25753e+07	2.09449e+07	2.19655e+07	2.93039e+07	2.94021e+07	2.37861e+07
Tb927.10.5790	hypothetical protein, conserved	7		1.3807	0.0160034	26.0021	25.8921	25.7925	26.5523	26.261	26.2569	6.72065e+07	6.22724e+07	5.81168e+07	9.84091e+07	8.04146e+07	8.01889e+07
Tb927.10.5880	Proteophosphoglycan, putative	17		1.38019	0.00861367	29.274	29.4056	29.4482	29.9162	29.6769	29.9216	6.49162e+08	7.11152e+08	7.32456e+08	1.01318e+09	8.58312e+08	1.01693e+09
Tb927.10.5920	hypothetical protein, conserved	6		0.736409	0.0195686	24.5373	24.8947	24.7675	24.2309	24.3929	24.2688	2.43472e+07	3.11926e+07	2.85606e+07	1.96898e+07	2.20292e+07	2.02133e+07
Tb927.10.5930	NEK family Serine/threonine-protein kinase, putative	16		0.765674	0.0131869	30.2209	30.3263	30.2516	30.0122	29.7166	29.9011	1.25137e+09	1.34629e+09	1.27828e+09	1.08287e+09	8.8222e+08	1.00261e+09
Tb927.10.5990	Centrosomal protein of 57 kDa, putative	10		1.32115	0.0459951	26.6569	26.39	26.2812	27.0223	26.7503	26.7711	1.05808e+08	8.7942e+07	8.15528e+07	1.36304e+08	1.12889e+08	1.14524e+08
Tb927.10.6050	clathrin heavy chain	63		1.19034	0.0460617	32.7534	32.8933	32.8513	33.2277	32.9701	33.0456	7.2402e+09	7.97736e+09	7.74864e+09	1.00584e+10	8.41373e+09	8.86555e+09
Tb927.10.6150	neurobeachin/beige protein, putative	12		0.907704	0.0414353	26.5206	26.6244	26.5678	26.4942	26.3679	26.4307	9.62679e+07	1.03456e+08	9.94721e+07	9.45267e+07	8.65992e+07	9.04558e+07
Tb927.10.6190	aldehyde dehydrogenase, putative	9		1.1074	0.0271896	29.1694	29.1253	29.0863	29.3448	29.2309	29.2454	6.03774e+08	5.85592e+08	5.6995e+08	6.81792e+08	6.30056e+08	6.36419e+08
Tb927.10.6290	ATP-dependent DEAD/H RNA helicase, putative	5		0.73595	0.0107975	26.1513	26.2802	26.2361	25.8053	25.9174	25.6036	7.45316e+07	8.14941e+07	7.90432e+07	5.86358e+07	6.33762e+07	5.09868e+07
Tb927.10.660	2-oxoisovalerate dehydrogenase alpha subunit, putative	13		0.838845	0.0368955	28.737	28.7258	28.7323	28.6313	28.3459	28.4426	4.47405e+08	4.43936e+08	4.45949e+08	4.15804e+08	3.41163e+08	3.64811e+08
Tb927.10.6850	Mitochondrial ribosomal protein S18, putative	7		1.15536	0.0131725	26.1027	26.0251	25.9846	26.3145	26.2199	26.203	7.20595e+07	6.82854e+07	6.63957e+07	8.34542e+07	7.81589e+07	7.72459e+07
Tb927.10.6900	base J-associated glucosyltransferase	4		1.49114	0.0329718	24.6601	25.0799	25.2389	25.54	25.4988	25.7198	2.65109e+07	3.54651e+07	3.95986e+07	4.87855e+07	4.74152e+07	5.52609e+07
Tb927.10.700	hypothetical protein, conserved	2		0.672226	0.00375236	24.43	24.4923	24.6107	23.9677	23.786	24.0534	2.26025e+07	2.36009e+07	2.5618e+07	1.6406e+07	1.44642e+07	1.74101e+07
Tb927.10.7050	Chromatin assembly factor 1 subunit B	3		1.38855	0.00699663	25.145	25.3386	25.1805	25.7694	25.5518	25.7607	3.71014e+07	4.24299e+07	3.80265e+07	5.71942e+07	4.91892e+07	5.6852e+07
Tb927.10.720	Flagellum attachment zone protein 24	10		0.885307	0.0419355	26.3048	26.4887	26.3414	26.2391	26.1818	26.1927	8.28972e+07	9.41657e+07	8.50253e+07	7.9208e+07	7.61232e+07	7.66972e+07
Tb927.10.7200	TPR repeat, putative	5		1.16743	0.0117373	25.646	25.728	25.6991	25.9635	25.8246	25.9521	5.25058e+07	5.55784e+07	5.4475e+07	6.54316e+07	5.94257e+07	6.49187e+07
Tb927.10.7230	Flagellar Member 1	57		1.28687	0.00596305	30.4169	30.4434	30.4425	30.9234	30.6968	30.7649	1.43346e+09	1.46008e+09	1.45917e+09	2.03638e+09	1.74041e+09	1.82458e+09
Tb927.10.7280	pre-mRNA splicing factor ATP-dependent RNA helicase, putative	15		1.13344	0.0412299	26.7132	26.8487	26.7344	27.0215	26.8691	26.9475	1.10023e+08	1.20853e+08	1.1165e+08	1.36229e+08	1.22579e+08	1.29425e+08
Tb927.10.730	ATP synthase, putative	9		1.11248	0.0080637	28.3622	28.3547	28.3095	28.5044	28.4456	28.5368	3.45045e+08	3.43245e+08	3.32675e+08	3.8078e+08	3.65588e+08	3.89439e+08
Tb927.10.7610	NADH-ubiquinone oxidoreductase complex I subunit, putative	24		1.32413	0.0219376	27.9567	28.0336	28.11	28.6199	28.2763	28.4023	2.60496e+08	2.7477e+08	2.89707e+08	4.12509e+08	3.25097e+08	3.54766e+08
Tb927.10.7620	mitochondrial ATP-dependent zinc metallopeptidase, putative	6		0.775438	0.0135381	25.9485	26.0987	26.1071	25.8239	25.6049	25.6197	6.4754e+07	7.18617e+07	7.2282e+07	5.93975e+07	5.10327e+07	5.15571e+07
Tb927.10.770	RF-1 domain containing protein, putative	6		0.824562	0.0105022	27.7619	27.9106	27.9209	27.5257	27.639	27.597	2.27603e+08	2.52309e+08	2.54107e+08	1.93221e+08	2.09008e+08	2.03015e+08
Tb927.10.7860	hypothetical protein, conserved	2		1.36626	0.0181714	24.8081	25.005	25.095	25.3539	25.3261	25.5799	2.93751e+07	3.36719e+07	3.58381e+07	4.28822e+07	4.20647e+07	5.01557e+07
Tb927.10.7940	methyltransferase, putative	4		1.25457	0.00979308	24.809	24.7437	24.8342	25.2412	25.0198	25.1002	2.93944e+07	2.80922e+07	2.99107e+07	3.9661e+07	3.40174e+07	3.59672e+07
Tb927.10.8030	Mitochondrial ATP synthase subunit 5	13		0.818551	0.0102547	31.309	31.3867	31.3511	31.171	30.9688	31.0342	2.66045e+09	2.80768e+09	2.73917e+09	2.41766e+09	2.10151e+09	2.19893e+09
Tb927.10.8120.1	RNA ligase/AAA domain containing protein, putative	3		0.77737	0.0284169	27.5938	27.8767	27.7931	27.4744	27.2587	27.4456	2.02559e+08	2.46451e+08	2.32565e+08	1.8647e+08	1.6058e+08	1.82786e+08
Tb927.10.8210	KREPA2	12		1.43293	0.0021882	26.2102	26.1454	26.1049	26.8041	26.6037	26.6021	7.76364e+07	7.42245e+07	7.21714e+07	1.17176e+08	1.0198e+08	1.01867e+08
Tb927.10.8240	Cytokinesis initiation factor 4	7		1.27294	0.00624242	25.7208	25.6401	25.5233	25.9946	25.9131	26.0255	5.53021e+07	5.22941e+07	4.82252e+07	6.68601e+07	6.3184e+07	6.83074e+07
Tb927.10.8600	Vps54-like protein, putative	14		0.905394	0.0459712	27.7238	27.7998	27.8118	27.7083	27.5622	27.6326	2.21657e+08	2.33652e+08	2.3561e+08	2.19293e+08	1.98171e+08	2.08089e+08
Tb927.10.8640	Galactose oxidase, central domain containing protein, putative	6		1.27688	0.016685	26.638	26.7187	26.8355	27.184	26.9537	27.1098	1.04436e+08	1.10441e+08	1.19753e+08	1.52471e+08	1.29975e+08	1.44835e+08
Tb927.10.8720	CCR4-NOT transcription complex subunit 10, putative	15		0.839921	0.0431155	29.4537	29.5506	29.6591	29.4031	29.1879	29.3168	7.35286e+08	7.86379e+08	8.47792e+08	7.09913e+08	6.11547e+08	6.68697e+08
Tb927.10.8790	OTU-like cysteine protease, putative	3		1.30472	0.00862312	26.4126	26.4646	26.4947	26.9488	26.6937	26.8702	8.93295e+07	9.26076e+07	9.45556e+07	1.29538e+08	1.08541e+08	1.22668e+08
Tb927.10.9330	hypothetical protein, conserved	9		0.821507	0.0367708	27.2156	27.4445	27.4493	27.0493	27.0309	27.1853	1.55851e+08	1.82645e+08	1.83255e+08	1.38886e+08	1.37124e+08	1.52612e+08
Tb927.10.9400	splicing factor 1	7		1.22181	0.0494845	27.0863	27.0538	27.0054	27.525	27.2028	27.2654	1.42496e+08	1.39322e+08	1.34719e+08	1.93128e+08	1.54476e+08	1.61326e+08
Tb927.10.9440	NADH dehydrogenase	12		0.759988	0.013644	30.1609	30.3758	30.3794	29.9755	29.7907	29.9654	1.20044e+09	1.39329e+09	1.39674e+09	1.05568e+09	9.28732e+08	1.04829e+09
Tb927.10.9700	Flagellum attachment zone protein 22	9		1.34995	0.0119508	27.2488	27.3317	27.3554	27.9238	27.657	27.6378	1.59478e+08	1.68909e+08	1.71708e+08	2.54633e+08	2.11632e+08	2.08839e+08
Tb927.10.9800	60S ribosomal protein L22	5		0.783473	0.00913283	28.0344	28.1947	28.1793	27.8915	27.7176	27.7423	2.74917e+08	3.07214e+08	3.03968e+08	2.48995e+08	2.20713e+08	2.24526e+08
Tb927.10.9920	hypothetical protein, conserved	6		0.67604	0.00197482	28.0673	28.2605	28.2737	27.6279	27.5721	27.7126	2.81255e+08	3.21551e+08	3.24505e+08	2.07415e+08	1.99534e+08	2.1995e+08
Tb927.11.10010	vacuolar sorting-associated protein-like, putative	7		1.19717	0.0440173	27.1896	27.2272	27.0945	27.5834	27.3657	27.3311	1.53066e+08	1.57108e+08	1.43302e+08	2.01115e+08	1.72937e+08	1.68838e+08
Tb927.11.10025	60S ribosomal protein L29, putative	3		0.705424	0.0184095	31.7299	31.3221	31.3814	30.9669	30.9754	31.0148	3.56161e+09	2.68477e+09	2.79733e+09	2.09879e+09	2.11119e+09	2.16965e+09
Tb927.11.10320	TatD related DNase, putative	4		0.800631	0.0107086	25.8212	25.8979	25.8092	25.6513	25.4472	25.4599	5.92856e+07	6.25252e+07	5.87945e+07	5.26988e+07	4.57464e+07	4.61531e+07
Tb927.11.10380	hypothetical protein, conserved	3		1.45243	0.0195394	24.8771	24.5034	24.6804	25.4088	25.1794	25.0936	3.08134e+07	2.3782e+07	2.68868e+07	4.45464e+07	3.79962e+07	3.58043e+07
Tb927.11.10510	ubiquinone biosynthesis methyltransferase, putative	10		1.44557	0.00540754	29.0125	29.0519	29.0535	29.754	29.4567	29.4834	5.41554e+08	5.56554e+08	5.57163e+08	9.05438e+08	7.36812e+08	7.50557e+08
Tb927.11.10590	Glutathione S-transferase, C-terminal domain containing protein, putative	4		0.752483	0.00259242	24.9351	24.8732	24.9536	24.6092	24.4135	24.503	3.20792e+07	3.07305e+07	3.24935e+07	2.5592e+07	2.23459e+07	2.37762e+07
Tb927.11.10780	Voltage-dependent anion channel, putative	7		1.3062	0.00777564	27.7778	27.9359	27.894	28.3562	28.1431	28.2613	2.30124e+08	2.56763e+08	2.49425e+08	3.43602e+08	2.96424e+08	3.21745e+08
Tb927.11.10930	tubulin delta chain	6		1.32884	0.012763	24.9134	25.1113	24.9447	25.544	25.3405	25.3122	3.16001e+07	3.62459e+07	3.22937e+07	4.89215e+07	4.24869e+07	4.16616e+07
Tb927.11.11010	hypothetical protein, conserved	18		1.08937	0.0451748	30.3436	30.3336	30.4228	30.5506	30.4404	30.479	1.36245e+09	1.35308e+09	1.43942e+09	1.57267e+09	1.45709e+09	1.49652e+09
Tb927.11.11170	hypothetical protein, conserved	2		0.881601	0.0131787	24.8294	24.9031	24.8024	24.6766	24.6051	24.7079	2.98131e+07	3.13756e+07	2.92597e+07	2.68153e+07	2.55194e+07	2.74046e+07
Tb927.11.11460	Mitochondrial import receptor subunit ATOM69	23		0.859779	0.0408342	30.4086	30.617	30.5382	30.3846	30.2621	30.2675	1.42527e+09	1.64683e+09	1.55925e+09	1.40174e+09	1.28768e+09	1.29251e+09
Tb927.11.11480	Trichohyalin, putative	5		0.798187	0.0168924	25.7094	25.7185	25.8358	25.5662	25.3229	25.3914	5.48651e+07	5.52125e+07	5.98875e+07	4.96803e+07	4.19703e+07	4.40132e+07
Tb927.11.11530	histone acetyltransferase, putative	3		1.28787	0.0137982	22.9894	23.1163	23.2835	23.5392	23.4596	23.4995	8.32749e+06	9.09253e+06	1.02105e+07	1.21899e+07	1.15358e+07	1.18588e+07
Tb927.11.11590	Eukaryotic translation initiation factor 3 subunit E	14		0.820654	0.011185	30.6444	30.776	30.765	30.494	30.3465	30.4883	1.67837e+09	1.83863e+09	1.82465e+09	1.51218e+09	1.36522e+09	1.50625e+09
Tb927.11.11720	FG-GAP repeat protein, putative	3		1.19735	0.0356296	26.8175	26.7874	26.8502	27.1901	26.9207	27.1114	1.1827e+08	1.15828e+08	1.20981e+08	1.53126e+08	1.27035e+08	1.44992e+08
Tb927.11.11730	MRP protein, putative	3		1.4513	0.0173188	25.3048	25.4325	25.2715	26.012	25.6145	25.9675	4.14481e+07	4.52842e+07	4.05035e+07	6.7671e+07	5.13741e+07	6.56124e+07
Tb927.11.11850	splicing factor 3B subunit 1, putative	16		1.28974	0.0281662	26.8466	26.8331	26.8559	27.4044	27.0409	27.1678	1.20677e+08	1.19558e+08	1.21463e+08	1.77643e+08	1.38076e+08	1.50776e+08
Tb927.11.12250	DNA replication licensing factor MCM4	5		1.31843	0.0327117	24.9668	25.1471	25.3667	25.4843	25.5526	25.6624	3.27912e+07	3.71567e+07	4.32636e+07	4.69403e+07	4.92151e+07	5.31059e+07
Tb927.11.12270	drug resistence protein, putative	2		1.39	0.034333	23.7609	23.4463	23.3505	24.1534	23.8469	23.999	1.42148e+07	1.14301e+07	1.06955e+07	1.86594e+07	1.50885e+07	1.67653e+07
Tb927.11.12320.2	hypothetical protein, conserved	2		0.756275	0.0362075	24.0523	23.9063	24.0939	23.4748	23.8455	23.4991	1.73962e+07	1.57219e+07	1.7905e+07	1.16576e+07	1.50738e+07	1.18561e+07
Tb927.11.12330	hypothetical protein, conserved	2		1.29926	0.0102502	23.8323	23.8926	24.0819	24.3195	24.2529	24.3768	1.49363e+07	1.5574e+07	1.77578e+07	2.09368e+07	1.99912e+07	2.17846e+07
Tb927.11.12440	Plus-3 domain/Zinc finger, C3HC4 type (RING finger), putative	8		0.837494	0.035421	27.3703	27.2558	27.2891	27.1849	26.9246	27.0285	1.73488e+08	1.60261e+08	1.63993e+08	1.52575e+08	1.27384e+08	1.36897e+08
Tb927.11.12670	Methyltransferase TYW3, putative	3		1.30122	0.0390953	22.5922	22.7654	22.9154	23.3078	23.0559	23.0519	6.3232e+06	7.12988e+06	7.91076e+06	1.03834e+07	8.71987e+06	8.69567e+06
Tb927.11.12680	prefoldin subunit 2, putative	4		0.759824	0.0108309	29.8195	29.8853	29.8008	29.3254	29.3748	29.6025	9.47472e+08	9.91671e+08	9.35235e+08	6.72696e+08	6.96143e+08	8.15182e+08
Tb927.11.12880	Present in the outer mitochondrial membrane proteome 17	19		0.779881	0.0276088	28.8838	29.1413	29.1783	28.7643	28.6159	28.7599	4.95341e+08	5.92134e+08	6.07508e+08	4.55944e+08	4.11377e+08	4.54564e+08
Tb927.11.13020	calmodulin	10		0.793513	0.0146102	33.9632	33.8316	33.8632	33.4097	33.6421	33.5981	1.67474e+10	1.52871e+10	1.56255e+10	1.14111e+10	1.34053e+10	1.30025e+10
Tb927.11.13125	cytochrome oxidase subunit X	3		0.724749	0.0031157	28.4678	28.7046	28.6557	28.1582	28.1467	28.1406	3.71253e+08	4.37476e+08	4.22898e+08	2.99545e+08	2.9716e+08	2.95916e+08
Tb927.11.13230	VAMP-associated protein, putative	9		1.35697	0.0175585	29.2911	29.6407	29.5917	29.9546	29.8949	30.0169	6.56923e+08	8.37032e+08	8.09072e+08	1.04047e+09	9.983e+08	1.08637e+09
Tb927.11.13250	eukaryotic translation initiation factor 2 gamma, putative	13		0.85265	0.0185166	30.9419	31.0093	31.0615	30.8182	30.6752	30.8269	2.0627e+09	2.16142e+09	2.24108e+09	1.89327e+09	1.71457e+09	1.90471e+09
Tb927.11.13380	VSG Exclusion Protein 2	18		1.28596	0.0124073	26.4349	26.5269	26.5236	26.9763	26.8764	26.7107	9.07181e+07	9.66947e+07	9.64705e+07	1.32033e+08	1.23196e+08	1.09833e+08
Tb927.11.13670	hypothetical protein, conserved	26		1.39096	0.00392199	27.9829	28.0248	27.8914	28.5776	28.3733	28.3697	2.65271e+08	2.73089e+08	2.48971e+08	4.00599e+08	3.47716e+08	3.46834e+08
Tb927.11.13810	ATP- dependent RNA helicase, putative	12		0.743246	0.00548906	28.1523	28.1019	28.2023	27.8519	27.5974	27.7133	2.98328e+08	2.88077e+08	3.08843e+08	2.42249e+08	2.03076e+08	2.20064e+08
Tb927.11.13830	DnaJ domain containing protein, putative	2		1.30243	0.0283594	25.1285	25.1317	25.2025	25.7386	25.3782	25.4658	3.66807e+07	3.67612e+07	3.86094e+07	5.59871e+07	4.36112e+07	4.63409e+07
Tb927.11.13840	hypothetical protein, conserved	7		1.18732	0.0102007	24.6737	24.5833	24.6693	24.9789	24.8366	24.8514	2.67632e+07	2.51364e+07	2.66808e+07	3.30683e+07	2.9962e+07	3.02697e+07
Tb927.11.13860	hypothetical protein, conserved	8		0.76768	0.00567365	27.6652	27.871	27.8733	27.446	27.4056	27.4231	2.12835e+08	2.45474e+08	2.4587e+08	1.82838e+08	1.77791e+08	1.79955e+08
Tb927.11.1390	class I transcription factor A, subunit 1	3		0.7877	0.0213981	25.7788	25.8846	25.964	25.4491	25.454	25.6847	5.75701e+07	6.19495e+07	6.5454e+07	4.58072e+07	4.5963e+07	5.39335e+07
Tb927.11.14140	ethanolamine-phosphate cytidylyltransferase	7		0.759671	0.0252551	26.8607	27.0887	27.0302	26.445	26.5749	26.7619	1.21865e+08	1.42728e+08	1.37053e+08	9.1359e+07	9.99621e+07	1.13798e+08
Tb927.11.14165	hypothetical protein	2		0.70064	0.0309379	24.5308	24.9584	24.9893	24.2907	24.284	24.4047	2.42384e+07	3.2601e+07	3.33062e+07	2.05224e+07	2.04271e+07	2.22101e+07
Tb927.11.14190	Staphylococcal nuclease homologue/Tudor domain containing protein, putative	24		1.17076	0.0334501	30.2514	30.3923	30.3507	30.6726	30.4933	30.5075	1.27817e+09	1.40927e+09	1.36917e+09	1.71145e+09	1.51145e+09	1.5264e+09
Tb927.11.14210	conserved protein	18		1.40654	0.0426785	27.1757	26.9829	27.0499	27.8526	27.3962	27.3927	1.51596e+08	1.32634e+08	1.38943e+08	2.4237e+08	1.76634e+08	1.76205e+08
Tb927.11.14300	Dynein intermediate chain, axonemal	21		1.14543	0.0391349	29.3292	29.332	29.3139	29.6395	29.4908	29.4241	6.7448e+08	6.7578e+08	6.67349e+08	8.36317e+08	7.54405e+08	7.20316e+08
Tb927.11.14390	hypothetical protein, conserved	5		1.34137	0.0378804	26.277	26.2161	26.2787	26.9334	26.5607	26.5119	8.13167e+07	7.79515e+07	8.14097e+07	1.28163e+08	9.8982e+07	9.56927e+07
Tb927.11.14460	ADP-ribosylation factor GTPase activating protein 1, putative	6		0.869337	0.0062078	27.6124	27.5258	27.5497	27.343	27.3226	27.4159	2.05193e+08	1.93233e+08	1.96463e+08	1.70235e+08	1.67853e+08	1.7907e+08
Tb927.11.14750	PSP1 C-terminal conserved region, putative	9		1.32904	0.0175409	27.7661	28.0187	28.0048	28.45	28.2205	28.3548	2.28256e+08	2.71946e+08	2.69321e+08	3.66697e+08	3.12764e+08	3.43267e+08
Tb927.11.14920	hypothetical protein, conserved	5		1.1478	0.0497938	24.7995	24.8617	24.8216	25.0085	24.9138	25.1481	2.92007e+07	3.04871e+07	2.96504e+07	3.3752e+07	3.16081e+07	3.71819e+07
Tb927.11.14980	mitochondrial ribosomal protein L38	7		0.896353	0.038698	26.5735	26.6821	26.6526	26.4914	26.4011	26.5408	9.98645e+07	1.07675e+08	1.05494e+08	9.43407e+07	8.86176e+07	9.76299e+07
Tb927.11.15030	small GTPase	7		1.21401	0.0339767	27.2108	27.4697	27.4705	27.6671	27.6261	27.711	1.55336e+08	1.85863e+08	1.85967e+08	2.1312e+08	2.07151e+08	2.19713e+08
Tb927.11.15120	hypothetical protein, conserved	8		1.40672	0.0498177	27.8702	27.6662	27.5721	28.4755	28.0991	27.9798	2.45341e+08	2.12992e+08	1.99546e+08	3.7323e+08	2.87518e+08	2.64703e+08
Tb927.11.15190	Domain of unknown function (DUF4200), putative	7		0.850053	0.0277257	26.9501	27.1064	27.1021	26.8192	26.7383	26.8989	1.29659e+08	1.44487e+08	1.44059e+08	1.18411e+08	1.11952e+08	1.25134e+08
Tb927.11.15730	cyclic nucleotide-binding domain containing protein, putative	8		1.23671	0.0331743	26.3236	26.134	26.2126	26.5497	26.3833	26.6506	8.39855e+07	7.36395e+07	7.77659e+07	9.82333e+07	8.75299e+07	1.05347e+08
Tb927.11.15850	kinteoplast poly(A) polymerase complex 1 subunit	11		0.847537	0.0319857	27.6691	27.612	27.6728	27.4754	27.265	27.4877	2.13412e+08	2.05136e+08	2.1397e+08	1.866e+08	1.61277e+08	1.88205e+08
Tb927.11.15870	hypothetical protein, conserved	3		1.46836	0.0205532	24.5046	24.601	24.9138	25.3124	25.0605	25.3263	2.38031e+07	2.54472e+07	3.16083e+07	4.16675e+07	3.49926e+07	4.20693e+07
Tb927.11.15880	60S ribosomal protein L27, putative	5		0.772654	0.0098582	31.0127	31.141	31.2099	30.737	30.659	30.8518	2.16651e+09	2.36805e+09	2.48381e+09	1.78956e+09	1.69538e+09	1.93783e+09
Tb927.11.15910	iron superoxide dismutase	4		0.792705	0.0198459	30.6805	30.9346	30.8665	30.4693	30.4313	30.583	1.72085e+09	2.05231e+09	1.95763e+09	1.48656e+09	1.44786e+09	1.6084e+09
Tb927.11.15970	Guanine nucleotide exchange factor in Golgi transport N-terminal/Sec7 domain containing protein, putative	13		1.31239	0.0208192	26.5618	26.4042	26.5631	27.0596	26.7456	26.8891	9.90629e+07	8.88119e+07	9.91465e+07	1.39874e+08	1.12522e+08	1.2429e+08
Tb927.11.16120	hypothetical protein, conserved	7		1.31513	0.00754523	25.8172	25.7755	25.7375	26.3157	26.1193	26.0701	5.91234e+07	5.74364e+07	5.59448e+07	8.35244e+07	7.28922e+07	7.0449e+07
Tb927.11.16200	cytoskeleton-associated protein 17	7		0.838612	0.0412382	29.7781	30.0261	29.9739	29.7434	29.6113	29.6703	9.20672e+08	1.09333e+09	1.05449e+09	8.98756e+08	8.20127e+08	8.54388e+08
Tb927.11.16220	Cytochrome b-c1 complex subunit, putative	3		0.809605	0.0151621	26.5514	26.7581	26.7709	26.4007	26.3531	26.4221	9.83488e+07	1.13502e+08	1.14513e+08	8.85913e+07	8.57188e+07	8.99155e+07
Tb927.11.16410	enolase, putative	5		1.31964	0.03938	25.9602	25.9879	25.9223	26.5899	26.1592	26.2881	6.52848e+07	6.65473e+07	6.35903e+07	1.01006e+08	7.49385e+07	8.19431e+07
Tb927.11.16510	hypothetical protein, conserved	2		0.845322	0.0172936	27.0363	26.904	27.0471	26.8361	26.7077	26.7171	1.3764e+08	1.2558e+08	1.38671e+08	1.19804e+08	1.09605e+08	1.10319e+08
Tb927.11.1660	vesicular transport protein (CDC48 homologue), putative	11		0.705857	0.00796373	28.0475	28.276	28.2802	27.7715	27.5655	27.762	2.77425e+08	3.25036e+08	3.25984e+08	2.29117e+08	1.98622e+08	2.2761e+08
Tb927.11.16830	Rab-like 5, small G protein	8		1.36055	0.0155152	28.8576	29.1951	29.0826	29.5334	29.3955	29.554	4.864e+08	6.14596e+08	5.68518e+08	7.77039e+08	7.06186e+08	7.8823e+08
Tb927.11.16880	leucine-rich repeat protein (LRRP), putative	9		1.26764	0.016461	27.0558	27.1694	27.1045	27.5461	27.2931	27.5065	1.39512e+08	1.50937e+08	1.44297e+08	1.95979e+08	1.6445e+08	1.90673e+08
Tb927.11.16920	VSG exclusion protein 1	2		1.41607	0.0472393	23.8886	24.2766	24.3075	24.893	24.5208	24.5722	1.55303e+07	2.03224e+07	2.07629e+07	3.11557e+07	2.40717e+07	2.4944e+07
Tb927.11.17020	hypothetical protein, conserved	2		1.13113	0.0395476	23.5099	23.6495	23.5655	23.6883	23.7357	23.8338	1.19452e+07	1.31584e+07	1.2414e+07	1.35169e+07	1.39687e+07	1.49518e+07
Tb927.11.1830	hypothetical protein, conserved	7		0.817884	0.0159004	28.1317	28.2739	28.2936	28.0221	27.8474	27.9595	2.94094e+08	3.24559e+08	3.29016e+08	2.72583e+08	2.41492e+08	2.61009e+08
Tb927.11.1960	leucine-rich repeat protein (LRRP), putative	4		1.24881	0.00236665	24.7505	24.7904	24.7126	25.1037	24.9897	25.1194	2.82262e+07	2.90174e+07	2.74946e+07	3.60551e+07	3.33165e+07	3.645e+07
Tb927.11.2230	carnitine O-acetyltransferase, putative	9		0.73977	0.0179632	27.5395	27.5943	27.5033	27.3058	26.9222	27.0801	1.95078e+08	2.02637e+08	1.90254e+08	1.65907e+08	1.2717e+08	1.41885e+08
Tb927.11.2340	hypothetical protein, conserved	10		1.31351	0.00701044	27.362	27.289	27.2889	27.8094	27.5645	27.7366	1.72501e+08	1.63984e+08	1.6397e+08	2.35222e+08	1.9849e+08	2.23639e+08
Tb927.11.240	hypothetical protein, conserved	4		0.758295	0.0170237	25.0302	24.9118	24.9196	24.5217	24.3997	24.7267	3.42632e+07	3.15641e+07	3.1736e+07	2.40857e+07	2.21325e+07	2.77636e+07
Tb927.11.2430	Cytoplasmic dynein 2 heavy chain (DYNC2H2), putative	90		1.25129	0.0339547	30.5276	30.628	30.5812	31.0722	30.7417	30.8756	1.54783e+09	1.6594e+09	1.60638e+09	2.25772e+09	1.79544e+09	1.97005e+09
Tb927.11.2440	Tubulin cofactor C domain-containing protein 1	5		1.33309	0.00563569	25.5591	25.6402	25.4691	25.897	25.9282	26.0855	4.94378e+07	5.22978e+07	4.64485e+07	6.24831e+07	6.38513e+07	7.12085e+07
Tb927.11.2465	hypothetical protein	3		0.757728	0.0419965	26.842	27.1773	27.1679	26.5433	26.6481	26.8073	1.20296e+08	1.51765e+08	1.50782e+08	9.77958e+07	1.05165e+08	1.17439e+08
Tb927.11.2500	Metallocarboxypeptidase 1	23		0.79515	0.0327738	32.473	32.6609	32.6366	32.4186	32.1269	32.2246	5.96125e+09	6.79087e+09	6.67713e+09	5.74075e+09	4.68982e+09	5.0186e+09
Tb927.11.2600	hypothetical protein, conserved	7		1.12877	0.0190047	26.0401	26.0718	26.0226	26.2949	26.2152	26.1451	6.89994e+07	7.0534e+07	6.81664e+07	8.23296e+07	7.79049e+07	7.42102e+07
Tb927.11.2620	hypothetical protein, conserved	13		0.673293	0.00329371	27.6833	27.6807	27.7357	27.2532	26.9507	27.1676	2.15522e+08	2.15135e+08	2.23495e+08	1.59972e+08	1.29709e+08	1.50755e+08
Tb927.11.2730	UDP-galactose 4-epimerase	9		1.34092	0.00251274	27.4068	27.5875	27.5245	27.8696	27.9355	27.9867	1.77935e+08	2.0168e+08	1.93061e+08	2.4524e+08	2.56696e+08	2.65978e+08
Tb927.11.2880	kinesin, putative	5		1.2352	0.0236517	25.1316	25.3257	25.3061	25.6498	25.5812	25.4471	3.6759e+07	4.20536e+07	4.14842e+07	5.2644e+07	5.02011e+07	4.57448e+07
Tb927.11.2910	phosphoglycerate mutase, putative	10		1.25526	0.0443584	26.3635	26.6597	26.7198	26.988	26.8793	26.8815	8.63361e+07	1.06012e+08	1.10524e+08	1.33109e+08	1.23443e+08	1.23631e+08
Tb927.11.3250	dynein heavy chain, putative	135		1.19534	0.0255253	32.4648	32.5618	32.5816	32.893	32.6729	32.8088	5.92757e+09	6.33967e+09	6.42765e+09	7.97578e+09	6.84738e+09	7.52356e+09
Tb927.11.3390	Concanavalin A-like lectin/glucanases superfamily/SPRY domain/HECT-domain (ubiquitin-transferase), putative	13		1.31421	0.0242488	26.2498	26.5277	26.4768	26.9361	26.685	26.8198	7.97966e+07	9.67453e+07	9.33891e+07	1.28403e+08	1.07888e+08	1.18454e+08
Tb927.11.3650	adenylosuccinate synthetase, putative	26		0.800267	0.0249428	32.2636	32.5196	32.4611	32.09	32.0156	32.1819	5.15582e+09	6.15709e+09	5.91254e+09	4.57129e+09	4.34159e+09	4.87208e+09
Tb927.11.3690	Alpha/beta hydrolase family, putative	5		1.38095	0.0381513	24.7302	24.4362	24.5465	25.2766	24.9391	24.8767	2.78308e+07	2.26994e+07	2.45043e+07	4.06455e+07	3.21665e+07	3.08069e+07
Tb927.11.3750	NADH-cytochrome b5 reductase, putative	5		0.809762	0.0349257	26.3638	26.5707	26.6468	26.3114	26.1569	26.2101	8.63581e+07	9.96753e+07	1.05068e+08	8.32776e+07	7.48171e+07	7.76285e+07
Tb927.11.3880	actin, putative	7		1.25644	0.00744408	26.3677	26.3317	26.4149	26.8178	26.6189	26.6591	8.65909e+07	8.44551e+07	8.94711e+07	1.18292e+08	1.0306e+08	1.05972e+08
Tb927.11.3900	glycosyltransferase family-like protein, putative	7		1.21995	0.00692569	27.3684	27.492	27.4286	27.8024	27.6711	27.6746	1.73259e+08	1.88759e+08	1.80646e+08	2.34074e+08	2.13712e+08	2.14235e+08
Tb927.11.4040	hypothetical protein, conserved	2		0.742364	0.00764474	23.7752	23.7593	23.8862	23.4673	23.4346	23.2205	1.43565e+07	1.41995e+07	1.55043e+07	1.15973e+07	1.13374e+07	9.77416e+06
Tb927.11.4290	40S ribosomal protein S12	2		0.74301	0.00355018	25.2321	25.3874	25.3087	24.9873	24.8246	24.8288	3.94121e+07	4.38892e+07	4.15603e+07	3.32593e+07	2.97136e+07	2.98004e+07
Tb927.11.4350	SUMO-interacting motif-containing protein	3		1.25573	0.049235	23.6324	23.5614	23.8305	24.0049	23.8536	24.15	1.30035e+07	1.23794e+07	1.49177e+07	1.68337e+07	1.51578e+07	1.86153e+07
Tb927.11.4420	hypothetical protein, conserved	11		0.780956	0.0109737	27.4829	27.7271	27.6138	27.2465	27.1962	27.3188	1.8758e+08	2.22175e+08	2.05397e+08	1.59231e+08	1.53771e+08	1.67405e+08
Tb927.11.4450	ALBA2	11		0.808492	0.0083484	32.1178	32.2066	32.1622	31.9598	31.759	31.842	4.66035e+09	4.9563e+09	4.80595e+09	4.17691e+09	3.6342e+09	3.84945e+09
Tb927.11.4550	Domain of unknown function (DUF4200), putative	8		0.780077	0.0192651	27.0992	27.3272	27.2591	26.8534	26.7652	26.9922	1.43767e+08	1.6839e+08	1.6062e+08	1.21246e+08	1.14062e+08	1.33494e+08
Tb927.11.4570	Ras-related protein Rab5B	3		1.41001	0.0111811	24.7037	24.9025	24.907	25.5045	25.2179	25.2708	2.73245e+07	3.13609e+07	3.14605e+07	4.76008e+07	3.90241e+07	4.04818e+07
Tb927.11.4690	mitochondrial DNA polymerase I protein B	10		1.42761	0.0247431	26.5037	26.7021	26.7275	27.3945	26.9766	27.0797	9.5149e+07	1.0918e+08	1.11119e+08	1.76432e+08	1.32059e+08	1.41846e+08
Tb927.11.4850	hypothetical protein, conserved	6		0.692862	0.0171139	26.0671	26.0628	25.8027	25.6503	25.3184	25.3687	7.03061e+07	7.00944e+07	5.85298e+07	5.26645e+07	4.1842e+07	4.33248e+07
Tb927.11.4860	Ring finger domain containing protein, putative	5		1.2995	0.00753311	24.6237	24.7734	24.8859	25.1374	25.1607	25.1306	2.58508e+07	2.86777e+07	3.10035e+07	3.69072e+07	3.75094e+07	3.67326e+07
Tb927.11.4890	Cap-specific mRNA (nucleoside-2'-O-)-methyltransferase	7		1.29665	0.0078736	25.9788	26.0775	26.1276	26.558	26.3639	26.3823	6.6132e+07	7.08125e+07	7.33132e+07	9.88011e+07	8.63619e+07	8.74686e+07
Tb927.11.4940	AAA ATPase, putative	4		0.814505	0.0076879	30.6515	30.6243	30.5581	30.36	30.3737	30.208	1.68661e+09	1.65514e+09	1.58088e+09	1.37807e+09	1.39122e+09	1.24022e+09
Tb927.11.4950	hypothetical protein, conserved	12		1.49757	0.00163784	27.4478	27.4503	27.431	28.174	27.9494	27.9413	1.83062e+08	1.83383e+08	1.80945e+08	3.02843e+08	2.59187e+08	2.57727e+08
Tb927.11.4960	transcription elongation factor s-II, putative	2		0.743359	0.00829931	24.0566	23.9545	24.0814	23.7407	23.5939	23.4642	1.74486e+07	1.62569e+07	1.77516e+07	1.4017e+07	1.26614e+07	1.15726e+07
Tb927.11.5020	hypothetical protein, conserved	13		0.85731	0.033591	27.2827	27.4357	27.4494	27.2045	27.0787	27.22	1.63269e+08	1.8154e+08	1.83273e+08	1.54657e+08	1.41743e+08	1.56331e+08
Tb927.11.5090	aspartate aminotransferase, mitochondrial	12		0.677314	0.0018088	29.2034	29.3716	29.327	28.8412	28.6426	28.7301	6.18144e+08	6.94593e+08	6.73438e+08	4.80912e+08	4.19073e+08	4.45279e+08
Tb927.11.5110	hypothetical protein, conserved	2		1.39311	0.039733	22.8488	22.518	22.5759	23.3641	23.0156	22.9889	7.55406e+06	6.00604e+06	6.25205e+06	1.07965e+07	8.47975e+06	8.32431e+06
Tb927.11.540.2-p1	ABC transporter, mitochondrial, putative	5		0.768129	0.0201887	25.9299	25.9409	26.0143	25.5617	25.4079	25.7542	6.39252e+07	6.44137e+07	6.77774e+07	4.95278e+07	4.45198e+07	5.65949e+07
Tb927.11.5450	malic enzyme	21		1.24857	0.00813935	31.5753	31.6837	31.6667	32.0696	31.8837	31.9291	3.19978e+09	3.44952e+09	3.40897e+09	4.5072e+09	3.9624e+09	4.08886e+09
Tb927.11.550	Suppressor of clathrin deficiency 6, putative	10		0.78828	0.00924756	29.7605	29.6636	29.6958	29.4961	29.2964	29.2898	9.09511e+08	8.50435e+08	8.69584e+08	7.572e+08	6.5931e+08	6.56296e+08
Tb927.11.5550	DNA polymerase theta	3		0.671793	0.0126994	25.6165	25.7953	25.9035	25.3843	25.0214	25.1793	5.14457e+07	5.82318e+07	6.2769e+07	4.37964e+07	3.40566e+07	3.79954e+07
Tb927.11.5690	SWI/SNF-related matrix-associated actin-dependent regulator of chromatin subfamily-related, putative	2		0.867135	0.0177802	23.0096	22.887	22.975	22.7178	22.7085	22.8281	8.4449e+06	7.75686e+06	8.24455e+06	6.89805e+06	6.85395e+06	7.44626e+06
Tb927.11.5700	hypothetical protein, conserved	15		1.34334	0.00491892	27.4547	27.4808	27.5037	28.0362	27.782	27.8876	1.8395e+08	1.87297e+08	1.90304e+08	2.75255e+08	2.30785e+08	2.48312e+08
Tb927.11.6040	Nodulin-like, putative	9		0.729141	0.000937773	26.8721	26.9145	26.9672	26.3789	26.4745	26.5307	1.22827e+08	1.26498e+08	1.31196e+08	8.72666e+07	9.32405e+07	9.69473e+07
Tb927.11.6270	inositol-1,4,5-trisphosphate (IP3) 5-phosphatase, putative	10		1.27902	0.00699641	27.8325	27.6803	27.7486	28.2154	28.0469	28.0621	2.39009e+08	2.1508e+08	2.25508e+08	3.11664e+08	2.77304e+08	2.8025e+08
Tb927.11.6320	MRB1-associated protein	8		1.37225	0.0199323	27.4994	27.6617	27.5422	28.2158	27.8373	27.9997	1.8974e+08	2.12332e+08	1.95449e+08	3.11756e+08	2.39802e+08	2.68388e+08
Tb927.11.6440	hypothetical protein, conserved	10		0.672374	0.0111198	30.9143	31.2772	31.2465	30.5167	30.5452	30.68	2.02361e+09	2.60238e+09	2.54754e+09	1.53621e+09	1.56682e+09	1.72027e+09
Tb927.11.6570	Nodulin-like, putative	10		0.716476	0.0372348	27.383	27.7721	27.7669	27.0244	27.1531	27.3197	1.75022e+08	2.29212e+08	2.28389e+08	1.36507e+08	1.49245e+08	1.67508e+08
Tb927.11.6720	mRNA cap guanine-N7 methyltransferase, putative	18		0.77956	0.0050579	28.7574	28.8011	28.8534	28.5481	28.3461	28.4343	4.53766e+08	4.67719e+08	4.84982e+08	3.92488e+08	3.41206e+08	3.62732e+08
Tb927.11.7040	pterin-4-alpha-carbinolamine dehydratase, putative	3		1.33224	0.0151794	25.905	25.6446	25.7268	26.0531	26.184	26.284	6.28327e+07	5.24574e+07	5.55321e+07	6.96262e+07	7.62402e+07	8.17102e+07
Tb927.11.7070	ATP-dependent DEAD/H RNA helicase, putative	3		1.49807	0.0245366	23.1504	22.999	22.9557	23.4322	23.476	23.9048	9.31007e+06	8.3829e+06	8.13485e+06	1.13184e+07	1.16675e+07	1.5706e+07
Tb927.11.7140	cell cycle sequence binding phosphoprotein (RBP33), putative	8		1.30973	0.00780832	26.5331	26.7623	26.5675	27.0754	26.9556	27.008	9.71077e+07	1.13828e+08	9.94552e+07	1.41418e+08	1.3015e+08	1.34961e+08
Tb927.11.7250	hypothetical protein, conserved	8		0.776865	0.00114511	28.0979	28.17	28.1498	27.8387	27.7061	27.778	2.87289e+08	3.02008e+08	2.97814e+08	2.40039e+08	2.18968e+08	2.30157e+08
Tb927.11.7450	Component of motile flagella 71	3		0.714076	0.0197722	23.9233	24.2419	24.3295	23.6775	23.6465	23.7424	1.59086e+07	1.98397e+07	2.10824e+07	1.34164e+07	1.3131e+07	1.40341e+07
Tb927.11.7520	hypothetical protein, conserved	6		0.823944	0.0276436	27.3967	27.5575	27.483	27.1929	27.0812	27.3196	1.76701e+08	1.97532e+08	1.87584e+08	1.53416e+08	1.41992e+08	1.67497e+08
Tb927.11.760	protein phosphatase 2C, putative	18		0.805546	0.00314426	31.7051	31.8519	31.8053	31.4501	31.4572	31.5219	3.50094e+09	3.8759e+09	3.75271e+09	2.93379e+09	2.94821e+09	3.08337e+09
Tb927.11.8060	SNARE associated Golgi protein, putative	8		1.29552	0.00911192	27.7242	27.784	27.8206	28.2825	28.0319	28.1255	2.21725e+08	2.31116e+08	2.37046e+08	3.26495e+08	2.74437e+08	2.92833e+08
Tb927.11.8090	protein phosphatase 1, putative	9		0.807717	0.0293814	28.2467	28.2692	28.3705	28.1331	27.8352	27.9815	3.18493e+08	3.23491e+08	3.47041e+08	2.94369e+08	2.39466e+08	2.65017e+08
Tb927.11.810	hypothetical protein, conserved	6		1.27591	0.00509799	26.3328	26.3273	26.3433	26.6652	26.5853	26.7994	8.45189e+07	8.41983e+07	8.51357e+07	1.06417e+08	1.00683e+08	1.16794e+08
Tb927.11.8100	Ankyrin repeats (3 copies), putative	4		0.79825	0.037027	26.3414	26.5185	26.2885	25.9661	25.9875	26.2161	8.50233e+07	9.61292e+07	8.19661e+07	6.55525e+07	6.65281e+07	7.79538e+07
Tb927.11.8180	hypothetical protein, conserved	6		1.33221	0.00989027	26.0613	26.1139	26.0498	26.6563	26.3917	26.4035	7.00197e+07	7.2621e+07	6.9466e+07	1.05763e+08	8.80403e+07	8.87676e+07
Tb927.11.8290	DIS3-like exonuclease, putative	19		1.24424	0.0168808	26.7177	26.9416	26.9583	27.2368	27.1734	27.1643	1.10361e+08	1.28891e+08	1.30391e+08	1.58156e+08	1.51363e+08	1.50406e+08
Tb927.11.8390	hypothetical protein, conserved	6		1.36393	0.00193876	25.6147	25.7568	25.8187	26.1964	26.1939	26.1503	5.13787e+07	5.67001e+07	5.91854e+07	7.68971e+07	7.67608e+07	7.44795e+07
Tb927.11.8970	ribose 5-phosphate isomerase, putative	7		0.839418	0.00910844	32.0764	32.0081	32.1313	31.8661	31.7399	31.8515	4.52857e+09	4.31926e+09	4.70404e+09	3.91437e+09	3.5865e+09	3.87481e+09
Tb927.11.9080	Nucleolar protein 136	17		0.853733	0.0495633	28.5989	28.6663	28.7343	28.5499	28.2997	28.4576	4.06563e+08	4.25992e+08	4.46565e+08	3.9299e+08	3.3041e+08	3.68626e+08
Tb927.11.9170	DNA topoisomerase III, putative	10		1.42139	0.0335281	25.9116	26.0117	25.9237	26.7408	26.3242	26.2569	6.31225e+07	6.7653e+07	6.36508e+07	1.12149e+08	8.40194e+07	8.01878e+07
Tb927.11.9280	hypothetical protein, conserved	7		0.745257	0.00258233	26.4511	26.4398	26.3808	25.9004	25.9858	26.1065	9.1744e+07	9.10301e+07	8.73828e+07	6.2634e+07	6.64499e+07	7.22526e+07
Tb927.11.9470	ADP-ribosylation factor GTPase activating protein, putative	3		1.26633	0.0350197	25.0541	24.8458	24.8525	25.2961	25.0957	25.378	3.48375e+07	3.01528e+07	3.02934e+07	4.11993e+07	3.58562e+07	4.36054e+07
Tb927.11.9600	hypothetical protein, conserved	2		1.35776	0.022087	24.8783	24.9615	25.2074	25.6005	25.4191	25.3611	3.0841e+07	3.26706e+07	3.87428e+07	5.0876e+07	4.48643e+07	4.30965e+07
Tb927.11.9610	eukaryotic translation initiation factor 3 subunit i	12		0.788164	0.00527915	29.5356	29.6486	29.5593	29.3043	29.1342	29.2716	7.78193e+08	8.4165e+08	7.91091e+08	6.62926e+08	5.89189e+08	6.48097e+08
Tb927.11.9620.2-p1	hypothetical protein, conserved	4		0.686752	0.00970774	24.3641	24.4816	24.7122	23.9459	23.9127	24.0886	2.15931e+07	2.34253e+07	2.74858e+07	1.61599e+07	1.57923e+07	1.78402e+07
Tb927.11.9820	TZ ciliopathy protein (tectonic), putative	9		0.748438	0.0105737	26.746	26.8824	26.8795	26.5296	26.2575	26.4573	1.12553e+08	1.23713e+08	1.23459e+08	9.68703e+07	8.02221e+07	9.2139e+07
Tb927.11.9940	hypothetical protein, conserved	2		1.26343	0.0171798	25.0486	24.8877	24.9438	25.3038	25.168	25.4145	3.47037e+07	3.10423e+07	3.22718e+07	4.14186e+07	3.76982e+07	4.47219e+07
Tb927.2.1080	retrotransposon hot spot protein 5 (RHS5), putative	18		0.799519	0.00810683	31.1277	31.1726	31.1972	30.9657	30.7613	30.7945	2.34617e+09	2.42043e+09	2.46207e+09	2.09709e+09	1.81998e+09	1.86239e+09
Tb927.2.1120	retrotransposon hot spot protein 4 (RHS4), point mutation	11		0.722301	0.00134827	31.0591	31.0952	31.1268	30.7301	30.5427	30.5945	2.23732e+09	2.29393e+09	2.34483e+09	1.7811e+09	1.56416e+09	1.62134e+09
Tb927.2.1180	retrotransposon hot spot protein 3 (RHS3), putative	4		0.744035	0.00544842	29.1261	29.1839	29.2008	28.8746	28.6139	28.7317	5.85905e+08	6.09839e+08	6.17037e+08	4.9219e+08	4.1082e+08	4.45762e+08
Tb927.2.1720	hypothetical protein, conserved	2		0.71704	0.012738	24.2	24.5341	24.452	23.9706	23.8288	23.9633	1.92725e+07	2.42945e+07	2.29494e+07	1.64388e+07	1.48999e+07	1.63562e+07
Tb927.2.1800	DNA polymerase delta catalytic subunit, putative	17		1.18953	0.034609	26.9533	27.0112	27.0709	27.3574	27.1214	27.2997	1.29941e+08	1.3526e+08	1.40979e+08	1.71949e+08	1.46005e+08	1.6521e+08
Tb927.2.1820	CAMK/CAMKL family protein kinase, putative	4		1.49108	0.00836873	25.0597	25.0217	25.1734	25.846	25.4708	25.647	3.49732e+07	3.40619e+07	3.78398e+07	6.03136e+07	4.65018e+07	5.25432e+07
Tb927.2.2270	hypothetical protein, conserved	2		0.702419	0.0236701	24.4743	24.474	24.4702	23.6814	23.9732	24.1905	2.33072e+07	2.33033e+07	2.32421e+07	1.34524e+07	1.64683e+07	1.91451e+07
Tb927.2.240	retrotransposon hot spot protein 5 (RHS5), putative	19		0.771098	0.00261986	31.5807	31.6979	31.7168	31.3554	31.2288	31.287	3.21167e+09	3.4834e+09	3.52941e+09	2.74745e+09	2.51647e+09	2.62016e+09
Tb927.2.2400	glycosyltransferase (GlcNAc), putative	3		0.849513	0.0373561	24.0721	24.233	24.2499	23.9606	23.856	24.0335	1.7637e+07	1.97178e+07	1.99497e+07	1.63254e+07	1.51839e+07	1.71716e+07
Tb927.2.2770	hypothetical protein, conserved	3		1.3037	0.00688055	26.8912	27.0127	26.985	27.4239	27.2158	27.3913	1.24469e+08	1.35402e+08	1.32832e+08	1.80057e+08	1.55875e+08	1.76038e+08
Tb927.2.280	retrotransposon hot spot protein 2 (RHS2), putative	23		0.742893	0.0060924	31.6668	31.8003	31.8768	31.4313	31.2532	31.3752	3.40932e+09	3.73987e+09	3.94331e+09	2.89576e+09	2.55946e+09	2.78533e+09
Tb927.2.2900	ARP2/3 complex subunit, putative	2		0.765541	0.0462319	23.2221	23.3287	23.5828	22.8355	23.0707	23.082	9.78479e+06	1.05348e+07	1.25639e+07	7.4846e+06	8.80969e+06	8.87938e+06
Tb927.2.2970	mitochondrial carrier protein	11		0.673157	0.0049451	28.9358	28.8362	28.8653	28.4988	28.2066	28.2002	5.13503e+08	4.79264e+08	4.89001e+08	3.79299e+08	3.09765e+08	3.08398e+08
Tb927.2.2990	hypothetical protein, conserved	7		1.35406	0.0128653	26.7214	26.5909	26.5584	27.2319	26.9486	26.9907	1.10648e+08	1.01078e+08	9.8824e+07	1.57621e+08	1.29521e+08	1.3336e+08
Tb927.2.3080	cytochrome b5-dependent oleate desaturase	4		0.815232	0.00456131	27.4973	27.5292	27.5213	27.2934	27.1223	27.2427	1.89452e+08	1.93694e+08	1.92631e+08	1.64491e+08	1.46096e+08	1.58805e+08
Tb927.2.3160	Gar1/Naf1 RNA binding region, putative	3		0.738702	0.0116147	24.802	24.9701	24.979	24.3352	24.4814	24.6168	2.92518e+07	3.28657e+07	3.30701e+07	2.11651e+07	2.34224e+07	2.57278e+07
Tb927.2.340	retrotransposon hot spot protein 4 (RHS4), putative	27		0.693456	0.00212002	32.3701	32.5827	32.5369	32.0008	31.8965	32.0137	5.55088e+09	6.43225e+09	6.2314e+09	4.29727e+09	3.99763e+09	4.33608e+09
Tb927.2.380	retrotransposon hot spot protein 2 (RHS2), putative	19		0.721511	0.00191692	31.3569	31.472	31.5365	31.0212	30.9094	31.0249	2.7502e+09	2.97866e+09	3.11487e+09	2.17932e+09	2.01672e+09	2.18481e+09
Tb927.2.3880	heterogeneous nuclear ribonucleoproteins F/H homologue	7		1.27812	0.0190024	27.1279	27.3563	27.38	27.6947	27.5484	27.6915	1.46656e+08	1.71819e+08	1.74664e+08	2.17244e+08	1.96295e+08	2.16751e+08
Tb927.2.400	retrotransposon hot spot protein 2 (RHS2), putative	23		0.751193	0.00540838	31.6213	31.7416	31.8095	31.3856	31.2128	31.3366	3.3035e+09	3.59062e+09	3.76367e+09	2.8055e+09	2.48873e+09	2.71182e+09
Tb927.2.4330	paraflagellar rod protein 5, putative	16		1.23807	0.0352996	27.7816	27.9481	27.9	28.3325	28.0422	28.1695	2.3072e+08	2.58945e+08	2.50452e+08	3.38019e+08	2.76401e+08	3.01901e+08
Tb927.2.4370	trypanothione synthetase	30		0.846815	0.0490471	31.7296	31.9209	31.9113	31.6947	31.4994	31.6489	3.56099e+09	4.06574e+09	4.03895e+09	3.47572e+09	3.03569e+09	3.36726e+09
Tb927.2.4390	double-strand break repair protein MRE11	8		1.35616	0.00621272	26.231	26.3488	26.1279	26.7826	26.6079	26.6381	7.8761e+07	8.54635e+07	7.33292e+07	1.15445e+08	1.02277e+08	1.04437e+08
Tb927.2.450	retrotransposon hot spot protein 4 (RHS4), putative	28		0.678802	0.000296392	32.1034	32.1854	32.1865	31.6734	31.5435	31.5801	4.61412e+09	4.88387e+09	4.88778e+09	3.4248e+09	3.12989e+09	3.2104e+09
Tb927.2.4710	TRRM1	15		0.713103	0.0067875	30.8229	31.1047	30.9797	30.5775	30.4224	30.453	1.89945e+09	2.30912e+09	2.11753e+09	1.60232e+09	1.43898e+09	1.46986e+09
Tb927.2.4850	Phosducin, putative	9		0.816611	0.0302558	29.0672	29.2558	29.2192	29.0043	28.7691	28.8893	5.62456e+08	6.41031e+08	6.24959e+08	5.38475e+08	4.57454e+08	4.972e+08
Tb927.2.5000	hypothetical protein, conserved	3		1.33115	0.026093	24.6226	24.7065	24.3999	25.1175	25.0051	24.849	2.58314e+07	2.73774e+07	2.21362e+07	3.64017e+07	3.36737e+07	3.02203e+07
Tb927.2.510	retrotransposon hot spot protein 4 (RHS4), putative	8		0.742358	0.0079619	29.7016	29.7899	29.9342	29.408	29.2739	29.4577	8.73125e+08	9.28228e+08	1.02584e+09	7.12354e+08	6.49099e+08	7.37337e+08
Tb927.2.5210	beta-ketoacyl-ACP reductase	2		1.39149	0.0366267	24.3654	24.3515	24.2915	25.0577	24.7904	24.5458	2.16124e+07	2.14061e+07	2.05342e+07	3.49228e+07	2.90178e+07	2.44921e+07
Tb927.2.5280	Enriched in surface-labeled proteome protein 1	5		0.739655	0.00708619	26.8772	26.9986	27.0716	26.525	26.4476	26.6675	1.23267e+08	1.34083e+08	1.41047e+08	9.6565e+07	9.15209e+07	1.0659e+08
Tb927.2.5530	Present in the outer mitochondrial membrane proteome 22-1	11		1.15512	0.0303146	26.4183	26.5633	26.5519	26.7304	26.6401	26.7878	8.96793e+07	9.9162e+07	9.83827e+07	1.11339e+08	1.04583e+08	1.15857e+08
Tb927.2.560	retrotransposon hot spot protein 4 (RHS4), putative	19		0.827371	0.0151161	31.0296	31.0952	31.1792	30.8961	30.7269	30.8593	2.19207e+09	2.29398e+09	2.43143e+09	1.99825e+09	1.77717e+09	1.94791e+09
Tb927.2.5660	adenylate kinase, putative	10		0.784813	0.0133799	28.8508	28.9927	28.9962	28.6171	28.4685	28.7005	4.84119e+08	5.34153e+08	5.3545e+08	4.11716e+08	3.71437e+08	4.36228e+08
Tb927.2.5800	sedoheptulose-1,7-bisphosphatase	7		1.34402	0.00944513	28.5344	28.7594	28.6536	29.1903	28.9694	29.0676	3.88775e+08	4.54413e+08	4.22268e+08	6.12563e+08	5.25596e+08	5.6264e+08
Tb927.2.5810	Holliday-junction resolvase-like of SPT6/SH2 domain containing protein, putative	25		0.770377	0.00184345	28.1831	28.2575	28.2911	27.9462	27.841	27.8142	3.04757e+08	3.20893e+08	3.28454e+08	2.58608e+08	2.40418e+08	2.35993e+08
Tb927.2.5980	chaperone protein ClpB1, putative	31		1.26756	0.025989	30.7238	30.9731	30.9107	31.286	31.082	31.2684	1.77332e+09	2.10775e+09	2.01862e+09	2.61842e+09	2.27315e+09	2.58662e+09
Tb927.2.820	retrotransposon hot spot protein 1 (RHS1), interrupted	13		0.812246	0.0248753	30.3098	30.5261	30.4849	30.2223	30.0393	30.1622	1.33099e+09	1.54617e+09	1.50268e+09	1.25263e+09	1.10338e+09	1.20149e+09
Tb927.3.1030	RBP28	17		0.803141	0.00716233	31.0179	31.2078	31.1218	30.8276	30.7428	30.8328	2.17428e+09	2.48014e+09	2.33673e+09	1.9056e+09	1.79682e+09	1.91245e+09
Tb927.3.1090	U1 small nuclear ribonucleoprotein 24 kDa	2		0.767289	0.000373058	25.0759	25.1292	25.1562	24.7154	24.7111	24.7882	3.53659e+07	3.66973e+07	3.73924e+07	2.75465e+07	2.74654e+07	2.89722e+07
Tb927.3.1190	hypothetical protein, conserved	17		1.44171	0.0278315	26.5062	26.4693	26.4135	27.2727	26.8499	26.8035	9.53147e+07	9.2906e+07	8.93844e+07	1.62143e+08	1.20954e+08	1.17131e+08
Tb927.3.1300	hypothetical protein, conserved	8		0.705438	0.00784563	28.0373	28.273	28.3057	27.786	27.597	27.731	2.75473e+08	3.24365e+08	3.31791e+08	2.31424e+08	2.03015e+08	2.22768e+08
Tb927.3.1380	ATP synthase subunit beta, mitochondrial	25		0.850583	0.0496563	34.2803	34.4746	34.4134	34.243	34.0372	34.1867	2.08647e+10	2.38715e+10	2.28799e+10	2.03314e+10	1.76287e+10	1.95531e+10
Tb927.3.2010	hypothetical protein, conserved	6		1.33008	0.000536186	25.325	25.3667	25.3389	25.7583	25.6852	25.8189	4.20322e+07	4.32662e+07	4.24401e+07	5.67572e+07	5.39526e+07	5.9193e+07
Tb927.3.2160	Rieske-like [2Fe-2S] domain containing protein, putative	2		1.34107	0.044438	21.5193	21.5024	21.8727	21.9265	22.0332	22.2204	3.00572e+06	2.97068e+06	3.84008e+06	3.98605e+06	4.29195e+06	4.88654e+06
Tb927.3.2180	Mitochondrial ATP synthase subunit, putative	3		1.2442	0.0278099	27.8383	27.6597	27.8666	28.23	28.0023	28.0772	2.3998e+08	2.12026e+08	2.44729e+08	3.1483e+08	2.68859e+08	2.83187e+08
Tb927.3.2410	Peroxisome biogenesis factor 10	2		1.3335	0.00177652	25.4268	25.2765	25.3421	25.8163	25.6963	25.7797	4.51043e+07	4.06418e+07	4.25331e+07	5.90847e+07	5.437e+07	5.76062e+07
Tb927.3.2750	hypothetical protein, conserved	6		1.1111	0.0440586	26.5858	26.6844	26.5817	26.8329	26.6951	26.7789	1.00721e+08	1.07845e+08	1.00436e+08	1.19538e+08	1.08651e+08	1.15143e+08
Tb927.3.2950	ribonuclease inhibitor- like protein	7		1.23922	0.0197496	25.2767	25.1077	25.1898	25.6171	25.3897	25.4916	4.06472e+07	3.6154e+07	3.82726e+07	5.14664e+07	4.39589e+07	4.71771e+07
Tb927.3.2960	inosine-adenosine-guanosine-nucleosidehydrolase	12		1.31105	0.00369228	31.4087	31.4099	31.4136	31.9185	31.701	31.7763	2.85078e+09	2.85308e+09	2.86045e+09	4.05897e+09	3.49107e+09	3.67816e+09
Tb927.3.3110	Condensin complex subunit 3, putative	10		1.14518	0.0104469	26.6762	26.675	26.712	26.9632	26.8302	26.8533	1.07234e+08	1.07145e+08	1.09933e+08	1.30836e+08	1.19317e+08	1.21241e+08
Tb927.3.3190	Serine/threonine-protein kinase NEK7, putative	13		1.24359	0.0297476	29.9185	30.1216	30.1065	30.4504	30.2269	30.4118	1.01473e+09	1.1682e+09	1.156e+09	1.46717e+09	1.25663e+09	1.42847e+09
Tb927.3.3270	ATP-dependent 6-phosphofructokinase, glycosomal	25		0.74524	0.0081083	31.871	32.0356	31.9661	31.659	31.4062	31.5285	3.92765e+09	4.40224e+09	4.19527e+09	3.3909e+09	2.84576e+09	3.0976e+09
Tb927.3.3360	acyltransferase, putative	7		1.33389	0.0102342	25.8784	25.8657	26.0665	26.4577	26.2379	26.3623	6.16827e+07	6.11437e+07	7.02726e+07	9.21657e+07	7.91372e+07	8.62695e+07
Tb927.3.3370	hypothetical protein, conserved	5		1.33926	0.0152975	25.7419	25.3827	25.5109	25.9941	25.9614	25.9673	5.61156e+07	4.37469e+07	4.7813e+07	6.68363e+07	6.5336e+07	6.56044e+07
Tb927.3.3440	phytanoyl-CoA dioxygenase (PhyH), putative	4		0.806969	0.0270316	25.258	25.2849	25.4061	25.1354	24.8609	25.0157	4.01259e+07	4.08792e+07	4.44633e+07	3.68573e+07	3.04707e+07	3.39212e+07
Tb927.3.3540	Nucleoporin NUP53b	11		1.20554	0.0316928	28.1324	28.0777	28.0962	28.504	28.3726	28.2259	2.94241e+08	2.83284e+08	2.86945e+08	3.80687e+08	3.47527e+08	3.13934e+08
Tb927.3.3660	NADH-ubiquinone oxidoreductase complex I subunit, putative	4		0.771895	0.029838	25.3923	25.6301	25.5833	25.167	25.0056	25.3075	4.40386e+07	5.19307e+07	5.02731e+07	3.76731e+07	3.3685e+07	4.15256e+07
Tb927.3.3670	TRRM3	14		0.799111	0.0316863	28.6648	28.9173	28.8408	28.3622	28.505	28.5877	4.25576e+08	5.06951e+08	4.8079e+08	3.45047e+08	3.80938e+08	4.03412e+08
Tb927.3.3690	flagellar radial spoke protein-like, putative	11		1.22117	0.0355128	28.9754	29.1996	29.1777	29.5116	29.3067	29.4024	5.27795e+08	6.16546e+08	6.07262e+08	7.65362e+08	6.64052e+08	7.09598e+08
Tb927.3.4080	Pyruvate transporter, putative	3		0.706937	0.0182612	26.8574	26.9964	27.0573	26.6948	26.3806	26.3124	1.21586e+08	1.33885e+08	1.39659e+08	1.08629e+08	8.73703e+07	8.33326e+07
Tb927.3.4160	XPC-binding domain/UBA/TS-N domain containing protein, putative	6		0.817063	0.0143667	28.9102	29.0543	29.0318	28.7502	28.5983	28.7714	5.04472e+08	5.57476e+08	5.4883e+08	4.51516e+08	4.06381e+08	4.5821e+08
Tb927.3.4210	hypothetical protein, conserved	12		0.759459	0.0272044	26.6039	26.7404	26.7939	26.4217	26.1035	26.407	1.0199e+08	1.12119e+08	1.16351e+08	8.98922e+07	7.20988e+07	8.89796e+07
Tb927.3.4230	serine peptidase, clan SB, family S8-like protein	4		1.31409	0.016316	24.0702	24.0276	23.9554	24.5881	24.294	24.3377	1.76132e+07	1.71012e+07	1.62662e+07	2.52214e+07	2.05701e+07	2.12015e+07
Tb927.3.4270	hypothetical protein, conserved	14		0.732825	0.00517984	29.51	29.5605	29.6253	29.16	28.9684	29.2131	7.64528e+08	7.91782e+08	8.28141e+08	5.99822e+08	5.2525e+08	6.22313e+08
Tb927.3.4420	hypothetical protein, conserved	4		1.26623	0.0138875	24.8736	24.9278	25.129	25.3699	25.3172	25.276	3.07391e+07	3.1916e+07	3.66918e+07	4.33618e+07	4.1807e+07	4.06274e+07
Tb927.3.4620	AAA domain containing protein, putative	8		1.15842	0.0245277	27.3066	27.4701	27.4717	27.5811	27.637	27.6715	1.66001e+08	1.85925e+08	1.86122e+08	2.00783e+08	2.08726e+08	2.13776e+08
Tb927.3.5020	Flagellar Member 6	28		1.21444	0.0213684	29.2246	29.3302	29.3388	29.6592	29.4451	29.624	6.27293e+08	6.74951e+08	6.78983e+08	8.4783e+08	7.30886e+08	8.27371e+08
Tb927.3.5050	60S ribosomal protein L4	19		0.798872	0.0251871	33.1361	33.304	33.3889	32.9622	32.855	33.045	9.4398e+09	1.06046e+10	1.12476e+10	8.36766e+09	7.76856e+09	8.86202e+09
Tb927.3.5060	Ankyrin repeats (many copies)/Ankyrin repeats (3 copies), putative	12		1.24629	0.0270568	28.6608	28.7228	28.6961	29.1633	28.8522	29.001	4.24374e+08	4.43034e+08	4.349e+08	6.01214e+08	4.84606e+08	5.37236e+08
Tb927.3.5430	hypothetical protein, conserved	7		0.901526	0.0082339	27.6266	27.65	27.6116	27.536	27.4424	27.4597	2.07224e+08	2.10608e+08	2.05085e+08	1.94605e+08	1.82389e+08	1.84582e+08
Tb927.3.5440	SNF2 DNA repair protein, putative	5		1.3015	0.0155223	24.7133	24.6927	24.6968	25.2392	24.9198	25.0667	2.7507e+07	2.71174e+07	2.71951e+07	3.96049e+07	3.17407e+07	3.51423e+07
Tb927.3.620	ATP-dependent DEAD/H RNA helicase, putative	8		0.883846	0.0472693	27.46	27.5949	27.5504	27.4148	27.2589	27.3955	1.84621e+08	2.02714e+08	1.96562e+08	1.78929e+08	1.60598e+08	1.76547e+08
Tb927.3.820	LSU ribosomal protein, mitochondrial, putative	2		0.748616	0.0126089	24.652	24.8351	24.8771	24.2457	24.3853	24.4803	2.63636e+07	2.99304e+07	3.08154e+07	1.98926e+07	2.19133e+07	2.34055e+07
Tb927.3.930	dynein heavy chain, putative	125		1.2632	0.00662024	31.9576	32.0645	32.0684	32.4612	32.275	32.3623	4.17062e+09	4.49144e+09	4.50351e+09	5.91293e+09	5.19684e+09	5.52098e+09
Tb927.4.1180.2	Programmed cell death protein 2, C-terminal putative domain containing protein, putative	3		1.33446	0.0309667	24.3841	24.6028	24.6638	25.1283	24.8005	24.9668	2.18954e+07	2.54789e+07	2.65785e+07	3.66752e+07	2.92201e+07	3.27919e+07
Tb927.4.1250	peroxisome biogenesis factor 1, putative	11		0.754299	0.00662038	27.276	27.495	27.4268	26.9291	26.9749	27.078	1.62513e+08	1.89159e+08	1.8042e+08	1.27777e+08	1.31902e+08	1.41677e+08
Tb927.4.1380	D-Tyr-tRNA(Tyr) deacylase, putative	4		1.2017	0.0439853	26.0294	25.8521	25.9781	26.3629	26.1287	26.1574	6.84914e+07	6.05688e+07	6.60983e+07	8.6305e+07	7.33691e+07	7.48474e+07
Tb927.4.1660	mitochondrial carrier protein, putative	5		1.36556	0.0385142	24.6356	24.6355	24.9968	25.3875	25.1286	25.1146	2.60655e+07	2.60627e+07	3.34806e+07	4.38921e+07	3.6682e+07	3.63295e+07
Tb927.4.1680	ZC3H10	10		1.17762	0.0400898	27.3367	27.5742	27.4373	27.7553	27.6179	27.6892	1.69496e+08	1.99835e+08	1.81744e+08	2.26562e+08	2.05978e+08	2.16416e+08
Tb927.4.1760	Cardiolipin-dependent protein 17kDa	2		0.836778	0.0369137	25.2773	25.2537	25.1528	25.0664	24.8202	25.0174	4.06647e+07	4.00053e+07	3.73036e+07	3.51356e+07	2.96217e+07	3.39605e+07
Tb927.4.1890	hypothetical protein, conserved	3		1.26364	0.0360479	27.0443	26.8961	26.8775	27.4573	27.2059	27.1547	1.38399e+08	1.24892e+08	1.23295e+08	1.84283e+08	1.54808e+08	1.49414e+08
Tb927.4.1900	Methyltransferase domain/Methyltransferase involved in Williams-Beuren syndrome, putative	2		1.34977	0.0355369	25.4121	25.0636	25.229	25.8408	25.5102	25.6538	4.46495e+07	3.50656e+07	3.93261e+07	6.00981e+07	4.77889e+07	5.27916e+07
Tb927.4.1930	eukaryotic translation initiation factor 3 subunit g	13		0.809921	0.00439175	28.6726	28.7696	28.7497	28.4742	28.3391	28.464	4.27877e+08	4.57614e+08	4.5136e+08	3.729e+08	3.39561e+08	3.70282e+08
Tb927.4.1980	hypothetical protein, conserved	3		0.690454	0.0221021	24.2621	24.7083	24.4383	23.8523	23.9129	24.067	2.01193e+07	2.74117e+07	2.27326e+07	1.51448e+07	1.57942e+07	1.75749e+07
Tb927.4.2030	DNA/RNA-binding protein Alba 4	8		0.793322	0.0303646	31.4105	31.6249	31.5482	31.3021	31.0347	31.2394	2.85441e+09	3.31154e+09	3.14015e+09	2.64779e+09	2.19983e+09	2.53512e+09
Tb927.4.2080	Coiled-coil and C2 domain-containing protein	36		0.804007	0.00302745	30.6078	30.7269	30.6824	30.392	30.2884	30.3925	1.63636e+09	1.77708e+09	1.72319e+09	1.40901e+09	1.31139e+09	1.40949e+09
Tb927.4.210	retrotransposon hot spot protein 2 (RHS2), interrupted, degenerate	7		0.714269	0.00424424	30.16	30.3961	30.4149	29.8447	29.834	29.8496	1.19971e+09	1.41303e+09	1.43147e+09	9.64186e+08	9.57028e+08	9.67447e+08
Tb927.4.2360	hypothetical protein, conserved	5		0.791758	0.021086	26.6375	26.8455	26.8413	26.5071	26.319	26.4899	1.044e+08	1.20584e+08	1.20239e+08	9.53749e+07	8.37158e+07	9.42421e+07
Tb927.4.2410	Glycosyl hydrolase family 65 central catalytic domain/Haloacid dehalogenase-like hydrolase, putative	7		1.18015	0.0286485	26.6024	26.7872	26.6913	26.8397	26.9961	26.9632	1.01886e+08	1.15814e+08	1.08362e+08	1.20105e+08	1.33857e+08	1.30842e+08
Tb927.4.2450	protein disulfide isomerase 1	15		1.36105	0.00408604	30.3043	30.3312	30.3008	30.8858	30.6303	30.7431	1.3259e+09	1.35083e+09	1.32268e+09	1.98405e+09	1.66209e+09	1.79725e+09
Tb927.4.2470	hypothetical protein, conserved	9		1.09834	0.048315	25.2637	25.2734	25.1668	25.4359	25.3224	25.3515	4.02836e+07	4.05557e+07	3.76663e+07	4.53922e+07	4.19561e+07	4.28109e+07
Tb927.4.2600	SUMO-interacting motif-containing protein	19		1.22916	0.0188738	27.1158	27.2389	27.2151	27.5335	27.3518	27.571	1.45436e+08	1.58387e+08	1.55797e+08	1.94278e+08	1.71281e+08	1.99386e+08
Tb927.4.2920	hypothetical protein, conserved	11		0.875737	0.033365	26.6734	26.784	26.7921	26.4673	26.5855	26.6211	1.07027e+08	1.15558e+08	1.16209e+08	9.27764e+07	1.00698e+08	1.0322e+08
Tb927.4.2990	hypothetical protein, conserved	6		1.197	0.00671546	26.1442	26.0949	26.1372	26.4729	26.3104	26.3672	7.41633e+07	7.16723e+07	7.38063e+07	9.31374e+07	8.32165e+07	8.65582e+07
Tb927.4.300	retrotransposon hot spot protein 3 (RHS3), putative	5		0.686441	0.0310708	28.0902	27.9112	28.3611	27.4576	27.509	27.7819	2.85746e+08	2.52415e+08	3.44781e+08	1.8431e+08	1.91004e+08	2.30773e+08
Tb927.4.3060	hypothetical protein, conserved	4		0.762598	0.0228091	28.3502	28.1971	28.198	28.0169	27.6794	27.8617	3.42178e+08	3.07732e+08	3.07927e+08	2.716e+08	2.14944e+08	2.439e+08
Tb927.4.3080	Uncharacterised ACR, YggU family COG1872, putative	2		0.810059	0.0205991	25.3892	25.1619	25.276	25.0269	25.0159	24.8768	4.39456e+07	3.75391e+07	4.06299e+07	3.41849e+07	3.39265e+07	3.08088e+07
Tb927.4.3140	Ribosome maturation protein SDO1	3		0.798014	0.0398472	24.3493	24.4285	24.3252	24.1958	23.8343	24.0752	2.13736e+07	2.25799e+07	2.10188e+07	1.92166e+07	1.4957e+07	1.76752e+07
Tb927.4.3160	dihydroxyacetone phosphate acyltransferase, putative	12		0.800208	0.025318	27.4154	27.4649	27.6126	27.0986	27.109	27.3174	1.79003e+08	1.85255e+08	2.05227e+08	1.43711e+08	1.44747e+08	1.67248e+08
Tb927.4.330	Cardiolipin-dependent protein 43kDa	4		0.728686	0.00882118	27.2558	27.5697	27.4433	27.0008	26.9217	26.9922	1.60253e+08	1.99202e+08	1.82494e+08	1.34294e+08	1.27124e+08	1.33493e+08
Tb927.4.3380	myosin IB heavy chain, putative	3		1.36705	0.0454143	23.1297	23.4891	23.2186	23.6138	23.6176	23.9564	9.17746e+06	1.17741e+07	9.76099e+06	1.28372e+07	1.28707e+07	1.62776e+07
Tb927.4.350	hypothetical protein, conserved	2		0.820795	0.00846968	23.4235	23.2568	23.276	23.0499	22.9849	23.0712	1.12504e+07	1.0023e+07	1.01575e+07	8.6839e+06	8.30131e+06	8.8131e+06
Tb927.4.3670	CBF/Mak21 family, putative	6		0.770445	0.0446317	26.1758	26.297	26.486	25.7726	25.9588	26.0975	7.58067e+07	8.2447e+07	9.39885e+07	5.73209e+07	6.52186e+07	7.1799e+07
Tb927.4.3840	nucleolar protein, putative	11		0.802077	0.012069	29.3349	29.4464	29.4743	29.1748	28.9815	29.1412	6.77172e+08	7.31536e+08	7.45853e+08	6.06028e+08	5.3003e+08	5.92066e+08
Tb927.4.3890	ATP-dependent RNA helicase, putative	17		0.853745	0.039798	28.9113	28.88	28.9777	28.8345	28.6262	28.615	5.04872e+08	4.94031e+08	5.28639e+08	4.78672e+08	4.14337e+08	4.11121e+08
Tb927.4.3900	hypothetical protein, conserved	2		0.703549	0.0313584	23.2238	23.4861	23.6243	23.04	22.7367	23.0431	9.79638e+06	1.17498e+07	1.29307e+07	8.62427e+06	6.98907e+06	8.64286e+06
Tb927.4.4050	glycosomal transporter (GAT1)	9		0.922726	0.0354278	27.2433	27.2725	27.3621	27.1741	27.1946	27.1636	1.58869e+08	1.62127e+08	1.72509e+08	1.51437e+08	1.53599e+08	1.50333e+08
Tb927.4.410	CAF 40	11		0.785709	0.00295079	29.6147	29.6476	29.6892	29.376	29.2075	29.3201	8.22097e+08	8.4104e+08	8.6562e+08	6.96731e+08	6.19905e+08	6.70231e+08
Tb927.4.4160	RNA editing mediator complex protein 5	12		1.21007	0.0247048	27.0989	27.2884	27.2301	27.5906	27.4239	27.4282	1.43737e+08	1.63915e+08	1.57422e+08	2.02113e+08	1.8006e+08	1.806e+08
Tb927.4.4220	small GTP-binding rab protein, putative	3		0.731189	0.000985881	25.0444	25.0193	24.8796	24.5168	24.5478	24.5289	3.46038e+07	3.40062e+07	3.08676e+07	2.40039e+07	2.45263e+07	2.42067e+07
Tb927.4.4370.2	hypothetical protein, conserved	4		0.788856	0.0170105	26.4679	26.6986	26.7388	26.2832	26.3275	26.2822	9.28163e+07	1.08914e+08	1.11993e+08	8.16647e+07	8.42123e+07	8.16049e+07
Tb927.4.4550	hypothetical protein, conserved	13		1.39823	0.00852847	27.561	27.7904	27.7412	28.3127	28.0644	28.1653	1.98005e+08	2.32129e+08	2.24355e+08	3.33402e+08	2.80696e+08	3.01032e+08
Tb927.4.4940	SUMO-interacting motif-containing protein	5		1.23424	0.00465691	26.2171	26.3887	26.3582	26.6126	26.6262	26.6417	7.80083e+07	8.78621e+07	8.60195e+07	1.02609e+08	1.03581e+08	1.04703e+08
Tb927.4.5000	TerD domain containing protein, putative	7		1.25084	0.0172627	27.1306	27.3816	27.2678	27.6617	27.5245	27.57	1.46935e+08	1.7486e+08	1.61597e+08	2.12327e+08	1.93066e+08	1.99251e+08
Tb927.4.5110	kinetoplastid kinetochore protein 8	8		1.12699	0.0201443	25.8157	25.7867	25.6668	25.9434	25.9125	25.9347	5.90604e+07	5.78837e+07	5.32674e+07	6.45251e+07	6.31616e+07	6.41401e+07
Tb927.4.5120	hypothetical protein, conserved	13		0.787517	0.00657137	26.9675	26.9261	27.0184	26.7221	26.5113	26.6386	1.31231e+08	1.2752e+08	1.35941e+08	1.107e+08	9.56534e+07	1.04473e+08
Tb927.4.5160	hypothetical protein, conserved	2		0.751453	0.0195089	23.9177	24.2182	24.2372	23.7328	23.6633	23.7603	1.58472e+07	1.95172e+07	1.97748e+07	1.39409e+07	1.32849e+07	1.42087e+07
Tb927.4.600	Alpha/beta hydrolase family, putative	9		0.883961	0.0388694	29.5401	29.6802	29.6408	29.4296	29.378	29.5197	7.80648e+08	8.60252e+08	8.37098e+08	7.23114e+08	6.97668e+08	7.69672e+08
Tb927.4.750	50S ribosomal protein L7Ae, putative	3		0.804746	0.0393049	29.1973	29.4631	29.4015	29.0345	28.9332	29.1584	6.15534e+08	7.40092e+08	7.09155e+08	5.49875e+08	5.12584e+08	5.99164e+08
Tb927.4.770	ubiquitin-protein ligase, putative	8		0.899662	0.0458511	26.6306	26.7467	26.7847	26.554	26.5344	26.6191	1.03897e+08	1.12607e+08	1.15608e+08	9.8523e+07	9.71948e+07	1.03071e+08
Tb927.4.790	hypothetical protein, conserved	2		1.41376	0.0126595	23.3273	23.3128	23.0141	23.8376	23.6579	23.6713	1.0525e+07	1.04194e+07	8.47077e+06	1.49911e+07	1.32358e+07	1.33588e+07
Tb927.4.800	target of rapamycin kinase 3, putative	9		1.26212	0.0217782	24.5453	24.439	24.4416	24.9671	24.7707	24.6834	2.44826e+07	2.27443e+07	2.27856e+07	3.27981e+07	2.86236e+07	2.69423e+07
Tb927.4.840	Histidine kinase-, DNA gyrase B-, and HSP90-like ATPase, putative	5		0.7703	0.00187742	25.0774	25.0771	24.9886	24.7037	24.7216	24.5863	3.54031e+07	3.53954e+07	3.32907e+07	2.73241e+07	2.76666e+07	2.51893e+07
Tb927.4.920	TPR repeat, putative	5		0.768448	0.0235009	25.6431	25.5287	25.8379	25.3998	25.217	25.2637	5.24018e+07	4.84062e+07	5.99753e+07	4.42696e+07	3.89996e+07	4.02843e+07
Tb927.5.1020	disulfide isomerase, putative	7		1.25557	0.00787367	25.7822	25.9522	25.9727	26.2906	26.2061	26.2011	5.77064e+07	6.49225e+07	6.58491e+07	8.20867e+07	7.74156e+07	7.71446e+07
Tb927.5.1090	threonyl-tRNA synthetase, putative	32		0.860406	0.0458953	32.2281	32.4289	32.4012	32.1276	32.0708	32.2136	5.03079e+09	5.78195e+09	5.67183e+09	4.6921e+09	4.51089e+09	4.98044e+09
Tb927.5.1130	hypothetical protein, conserved	5		1.27485	0.0213014	26.7075	26.6857	26.9436	27.2176	27.0466	27.133	1.09588e+08	1.07946e+08	1.29072e+08	1.56064e+08	1.38628e+08	1.47181e+08
Tb927.5.1360	nucleoside 2-deoxyribosyltransferase	8		1.17063	0.0425397	28.1204	28.2702	28.3654	28.4248	28.4839	28.5373	2.91804e+08	3.23716e+08	3.45801e+08	3.60354e+08	3.7542e+08	3.8958e+08
Tb927.5.1520	ATP-dependent protease ATPase subunit HslU1	20		1.20977	0.0466077	29.874	29.7867	29.8558	30.2883	30.0394	29.997	9.83941e+08	9.26192e+08	9.71588e+08	1.31127e+09	1.10343e+09	1.07153e+09
Tb927.5.1540	hypothetical protein, conserved	6		1.37877	0.0326458	25.4421	25.1391	25.3077	25.8926	25.8453	25.531	4.5587e+07	3.69509e+07	4.15312e+07	6.22948e+07	6.02833e+07	4.84844e+07
Tb927.5.1730	Ecotin-like protein	6		0.855247	0.04355	28.3538	28.5392	28.4934	28.2071	28.162	28.3408	3.43039e+08	3.90073e+08	3.7789e+08	3.09872e+08	3.00338e+08	3.39971e+08
Tb927.5.1780	hypothetical protein, conserved	17		0.790167	0.0227516	30.6113	30.8376	30.7988	30.5059	30.2908	30.4336	1.64033e+09	1.9189e+09	1.86796e+09	1.5247e+09	1.3135e+09	1.45018e+09
Tb927.5.1810	lysosomal/endosomal membrane protein p67	17		0.720799	0.00205751	30.5582	30.6376	30.7438	30.2326	30.1016	30.1912	1.581e+09	1.67042e+09	1.79801e+09	1.26161e+09	1.15211e+09	1.2259e+09
Tb927.5.2060	Cell division cycle 5-like protein	7		0.769615	0.00435514	27.2621	27.2467	27.3788	26.9809	26.819	26.9528	1.60957e+08	1.5925e+08	1.74516e+08	1.32451e+08	1.18394e+08	1.29901e+08
Tb927.5.2140	regulator of nonsense transcripts 1	13		0.823417	0.018245	28.3212	28.2905	28.2797	28.1579	27.9297	27.9522	3.35386e+08	3.28316e+08	3.25875e+08	2.99485e+08	2.55671e+08	2.59679e+08
Tb927.5.2540	Organic solute transport protein 1, putative	6		1.34954	0.04512	28.2716	28.6013	28.7155	29.1202	28.8808	28.9086	3.2403e+08	4.0723e+08	4.40779e+08	5.83504e+08	4.94312e+08	5.03904e+08
Tb927.5.2600	methyltransferase domain containing protein, putative	3		1.39339	0.0379065	25.0611	25.4878	25.1999	25.8517	25.8051	25.5423	3.50056e+07	4.70547e+07	3.8542e+07	6.05531e+07	5.86277e+07	4.88658e+07
Tb927.5.2630	hypothetical protein, conserved	2		1.19884	0.0477891	23.4285	23.4337	23.3126	23.7627	23.489	23.6972	1.129e+07	1.13301e+07	1.04179e+07	1.42324e+07	1.17734e+07	1.36012e+07
Tb927.5.2940	stress-induced protein sti1, putative	43		1.25479	0.0177485	31.7776	31.8681	31.8409	32.2986	32.0282	32.1306	3.68134e+09	3.91975e+09	3.84642e+09	5.28268e+09	4.37962e+09	4.70195e+09
Tb927.5.300	thymine-7-hydroxylase, putative	3		1.15589	0.0465451	25.6728	25.7246	25.6998	26.046	25.832	25.8361	5.34907e+07	5.54474e+07	5.45016e+07	6.92845e+07	5.97317e+07	5.99023e+07
Tb927.5.3010	Guide RNA binding complex protein 6	14		0.835329	0.0110558	28.5687	28.5741	28.6724	28.408	28.2518	28.3744	3.98148e+08	3.99644e+08	4.27806e+08	3.56182e+08	3.19624e+08	3.47973e+08
Tb927.5.3170	ribose-phosphate pyrophosphokinase, putative	13		0.754172	0.0261279	28.4012	28.7095	28.701	28.2456	28.0868	28.2722	3.54509e+08	4.38971e+08	4.3637e+08	3.18262e+08	2.85077e+08	3.24179e+08
Tb927.5.3550	hypothetical protein, conserved	3		1.20805	0.00959672	24.7351	24.7595	24.6633	25.0655	24.8943	25.0126	2.79263e+07	2.84013e+07	2.65704e+07	3.51137e+07	3.11832e+07	3.38479e+07
Tb927.5.3750	PPCT1	3		0.829226	0.0246717	27.8125	27.9788	27.9629	27.7289	27.5404	27.6737	2.35722e+08	2.64512e+08	2.61613e+08	2.22443e+08	1.95204e+08	2.14096e+08
Tb927.5.3800	glutamine hydrolysing (not ammonia-dependent) carbomoyl phosphate synthase, putative	61		0.677481	0.00307742	32.8681	33.0493	33.0432	32.5271	32.3045	32.4423	7.83929e+09	8.88882e+09	8.85101e+09	6.18932e+09	5.30423e+09	5.83584e+09
Tb927.5.3870	LSU ribosomal protein, mitochondrial, putative	6		1.47863	0.0101956	24.6737	24.6411	24.5116	25.3878	25.0416	25.0686	2.67628e+07	2.61644e+07	2.39189e+07	4.39027e+07	3.45351e+07	3.51895e+07
Tb927.5.4020	hypothetical protein	4		0.709395	0.00999243	28.2566	28.5615	28.455	28.0466	27.8974	27.8523	3.20687e+08	3.96158e+08	3.67974e+08	2.77238e+08	2.50013e+08	2.42314e+08
Tb927.5.4310	GTP-binding protein, putative	13		0.745723	0.0141649	27.9435	28.2242	28.1421	27.5881	27.6728	27.7863	2.58118e+08	3.13563e+08	2.96216e+08	2.01764e+08	2.13965e+08	2.31482e+08
Tb927.5.4520	Kinetochore interacting protein 1	13		0.911857	0.00330803	27.5406	27.5505	27.4879	27.3861	27.4104	27.3839	1.95236e+08	1.96578e+08	1.8823e+08	1.75398e+08	1.78383e+08	1.75135e+08
Tb927.5.460	hypothetical protein, conserved	2		0.813895	0.0316832	25.4947	25.741	25.7148	25.4446	25.3346	25.2879	4.72776e+07	5.60803e+07	5.50699e+07	4.56666e+07	4.2312e+07	4.0965e+07
Tb927.5.520	stomatin-like protein, putative	8		0.77424	0.0145701	29.3041	29.5539	29.5319	29.145	29.021	29.1264	6.62836e+08	7.88152e+08	7.76242e+08	5.93649e+08	5.44725e+08	5.86037e+08
Tb927.5.580	prefoldin subunit, putative	6		0.787176	0.0464792	27.928	28.2815	28.2222	27.7136	27.8678	27.8343	2.55367e+08	3.26269e+08	3.1313e+08	2.201e+08	2.44924e+08	2.39315e+08
Tb927.5.720	hypothetical protein	2		1.0944	0.0373643	22.8921	23.0114	22.9667	23.043	23.1276	23.0913	7.78414e+06	8.4551e+06	8.19715e+06	8.64228e+06	9.16421e+06	8.93674e+06
Tb927.5.820	hypothetical protein, conserved	2		0.747537	0.0348293	26.9797	27.344	27.3719	26.757	26.8557	26.8535	1.32339e+08	1.70362e+08	1.73688e+08	1.13416e+08	1.21443e+08	1.21261e+08
Tb927.5.840	Nucleolar protein 111	9		0.799963	0.031978	25.9194	26.236	26.1247	25.8385	25.7316	25.7596	6.34639e+07	7.90373e+07	7.31656e+07	6.00007e+07	5.57168e+07	5.68079e+07
Tb927.5.900	oligosaccharyl transferase subunit, putative	10		1.41511	0.0232831	28.2939	28.287	28.3193	29.0592	28.6339	28.6703	3.29083e+08	3.27525e+08	3.34929e+08	5.59376e+08	4.16557e+08	4.27198e+08
Tb927.6.1190	Plus-3 domain/Zinc finger, C3HC4 type (RING finger), putative	3		0.740297	0.0381593	25.3692	25.5987	25.467	25.2905	24.8714	24.9452	4.33387e+07	5.08144e+07	4.63809e+07	4.1039e+07	3.06935e+07	3.23043e+07
Tb927.6.1200	Polyadenylation mediator complex protein PAMC2, putative	7		0.838083	0.0304374	27.5155	27.5889	27.6933	27.3957	27.2278	27.4084	1.91864e+08	2.01878e+08	2.17033e+08	1.76579e+08	1.57171e+08	1.7813e+08
Tb927.6.1220	hypothetical protein, conserved	5		1.26845	0.037062	25.1913	25.5434	25.2214	25.7091	25.6464	25.656	3.8311e+07	4.89012e+07	3.91192e+07	5.48537e+07	5.25215e+07	5.28704e+07
Tb927.6.1410	NADH dehydrogenase (ubiquinone) 1 alpha subcomplex subunit, putative	3		0.793016	0.0138531	23.8205	23.9456	23.8551	23.4165	23.5297	23.6635	1.48142e+07	1.61566e+07	1.51744e+07	1.11965e+07	1.21102e+07	1.32872e+07
Tb927.6.1470	hypothetical protein, conserved	7		0.762762	0.0465064	27.8101	28.1838	28.1082	27.5065	27.6909	27.7482	2.35331e+08	3.04905e+08	2.89351e+08	1.9067e+08	2.16662e+08	2.25446e+08
Tb927.6.1550	Leucine-rich repeat, ribonuclease inhibitor subtype domain-containing protein	2		0.67561	0.0212982	25.1885	25.6055	25.4168	25.0216	24.7994	24.704	3.82383e+07	5.10537e+07	4.47934e+07	3.40594e+07	2.91989e+07	2.73311e+07
Tb927.6.1610	ribosomal RNA adenine dimethylase family protein, conserved	11		1.29505	0.0217524	27.2567	27.0851	27.1098	27.6402	27.3536	27.5676	1.60357e+08	1.42375e+08	1.44827e+08	2.09187e+08	1.71501e+08	1.98923e+08
Tb927.6.1800	protein phosphatase 2C, putative	10		0.831593	0.0152748	28.2663	28.4613	28.4126	28.1283	28.0621	28.1571	3.22849e+08	3.6957e+08	3.57308e+08	2.93399e+08	2.80238e+08	2.99308e+08
Tb927.6.1810	Alpha/beta hydrolase family, putative	4		0.70586	0.00898897	26.3322	26.6171	26.5906	25.9225	26.0153	26.1054	8.44879e+07	1.02929e+08	1.01056e+08	6.35987e+07	6.78254e+07	7.21975e+07
Tb927.6.2280	prefoldin subunit, putative	5		0.771045	0.00906356	29.254	29.4584	29.3572	29.0731	28.8906	28.982	6.40228e+08	7.37659e+08	6.87711e+08	5.64793e+08	4.97673e+08	5.30202e+08
Tb927.6.2490	succinate dehydrogenase subunit 7	5		0.831776	0.0459902	27.5874	27.4895	27.7299	27.3285	27.2365	27.4471	2.01671e+08	1.88439e+08	2.22608e+08	1.68534e+08	1.58127e+08	1.82983e+08
Tb927.6.2550	TRRM2	14		1.24461	0.0344439	29.1274	29.386	29.3388	29.6787	29.4794	29.6464	5.86438e+08	7.01584e+08	6.78989e+08	8.59371e+08	7.48462e+08	8.40324e+08
Tb927.6.2610	hypothetical protein, conserved	2		0.71841	0.00650218	24.3764	24.5872	24.4833	23.8788	24.019	24.1157	2.17782e+07	2.52043e+07	2.34538e+07	1.54249e+07	1.69993e+07	1.81779e+07
Tb927.6.2650	nucleolar mif4g domain-containing protein 1	2		0.814982	0.00474671	24.785	24.7902	24.9342	24.5105	24.5502	24.5676	2.89091e+07	2.90123e+07	3.2058e+07	2.39005e+07	2.45662e+07	2.48648e+07
Tb927.6.2700	small nuclear ribonucleoprotein Sm-E	3		0.701303	0.0311085	26.9514	27.0377	27.3724	26.5021	26.5566	26.7862	1.29774e+08	1.37773e+08	1.73745e+08	9.50415e+07	9.87043e+07	1.15733e+08
Tb927.6.2710	E3 ubiquitin-protein ligase HEL2, putative	11		0.77232	0.00533916	27.0723	27.2802	27.2109	26.8487	26.7602	26.8423	1.41113e+08	1.62985e+08	1.55347e+08	1.20855e+08	1.1366e+08	1.20324e+08
Tb927.6.2840	Serine/threonine-protein kinase RIO2, putative	7		0.750951	0.0113419	27.4739	27.7319	27.6442	27.1019	27.2797	27.2347	1.86415e+08	2.22911e+08	2.09765e+08	1.44045e+08	1.62935e+08	1.57928e+08
Tb927.6.3070	hypothetical protein, conserved	2		0.699211	0.00323709	22.4251	22.3336	22.205	21.7673	21.9071	21.7436	5.63143e+06	5.28558e+06	4.83458e+06	3.56956e+06	3.93283e+06	3.5113e+06
Tb927.6.3130	queuine tRNA-ribosyltransferase, putative	5		1.20308	0.0433048	26.542	26.5399	26.49	26.96	26.6792	26.7172	9.77128e+07	9.75709e+07	9.42484e+07	1.30548e+08	1.07458e+08	1.10324e+08
Tb927.6.3150	Hydin	44		1.15738	0.0356705	28.3324	28.3259	28.3006	28.6398	28.4112	28.5317	3.38e+08	3.36466e+08	3.30626e+08	4.18252e+08	3.56965e+08	3.8806e+08
Tb927.6.3510	tRNA modification enzyme, putative	5		0.735587	0.0276307	26.1086	26.4381	26.1426	25.8754	25.6374	25.8587	7.23574e+07	9.09211e+07	7.40808e+07	6.15583e+07	5.21941e+07	6.08459e+07
Tb927.6.3790	valosin-containing protein homolog, putative	7		0.77803	0.00195547	25.6569	25.7385	25.8245	25.3853	25.3974	25.3554	5.29041e+07	5.59834e+07	5.94212e+07	4.38251e+07	4.41959e+07	4.29282e+07
Tb927.6.3940	Autophagy-related protein 27, putative	7		0.79566	0.00220301	28.3383	28.4138	28.3619	28.1238	27.9927	28.0056	3.39383e+08	3.57595e+08	3.44974e+08	2.92488e+08	2.67075e+08	2.69476e+08
Tb927.6.4000	small glutamine-rich tetratricopeptide repeat protein, putative	18		0.731547	0.00194838	30.5977	30.7588	30.7023	30.2901	30.1558	30.2611	1.62492e+09	1.8169e+09	1.74707e+09	1.31292e+09	1.19623e+09	1.28676e+09
Tb927.6.4010	Translation machinery associated TMA7, putative	3		0.70359	0.00354758	27.1223	27.3097	27.3957	26.7468	26.7883	26.7841	1.46095e+08	1.66352e+08	1.76576e+08	1.12611e+08	1.159e+08	1.15561e+08
Tb927.6.410	hypothetical protein, conserved	6		0.777538	0.00277473	24.6055	24.6544	24.4897	24.2665	24.1784	24.2192	2.55271e+07	2.6406e+07	2.35581e+07	2.01813e+07	1.89858e+07	1.95302e+07
Tb927.6.4200	LSU ribosomal protein, mitochondrial, putative	7		0.846746	0.0400344	26.3802	26.5487	26.395	26.3104	26.1062	26.1861	8.73425e+07	9.81668e+07	8.82468e+07	8.32178e+07	7.22342e+07	7.63498e+07
Tb927.6.4350	ribosomal RNA assembly protein, putative	6		0.724584	0.00452268	26.2199	26.2099	26.2325	25.9106	25.7004	25.6431	7.81611e+07	7.76167e+07	7.88453e+07	6.30764e+07	5.45251e+07	5.24025e+07
Tb927.6.4360	hypothetical protein, conserved	2		0.677118	0.00220682	24.4871	24.6397	24.3662	23.9193	23.9413	23.9575	2.35155e+07	2.61384e+07	2.16249e+07	1.5865e+07	1.61085e+07	1.62906e+07
Tb927.6.4410	S-adenosylmethionine decarboxylase	6		0.779517	0.049433	27.6328	27.9057	27.8741	27.6148	27.2807	27.4348	2.08112e+08	2.51454e+08	2.46006e+08	2.05532e+08	1.63046e+08	1.81428e+08
Tb927.6.4530	RBP17	3		0.801024	0.00743875	28.8471	28.8848	29.0368	28.6331	28.5529	28.6281	4.82892e+08	4.95676e+08	5.50743e+08	4.16322e+08	3.93809e+08	4.14883e+08
Tb927.6.4600	pre-mRNA splicing factor ATP-dependent RNA helicase, putative	6		1.41729	0.0332289	24.8125	24.8625	24.712	25.5118	25.3349	25.0097	2.94653e+07	3.05036e+07	2.7483e+07	4.78427e+07	4.23223e+07	3.378e+07
Tb927.6.4630	kinetoplastid-specific phospho-protein phosphatase, putative	7		1.28468	0.0130463	27.3169	27.354	27.2959	27.841	27.5751	27.6212	1.6719e+08	1.71538e+08	1.64768e+08	2.40419e+08	1.99957e+08	2.06454e+08
Tb927.6.4770	protein mkt1, putative	20		0.852054	0.0347712	30.138	30.3579	30.3176	30.0271	30.0064	30.0949	1.18156e+09	1.37605e+09	1.33816e+09	1.0941e+09	1.07853e+09	1.14678e+09
Tb927.6.5000	Protein of unknown function (DUF773), putative	5		0.750192	0.0111111	26.5419	26.811	26.6857	26.2175	26.2176	26.3668	9.77028e+07	1.1774e+08	1.07941e+08	7.80289e+07	7.80337e+07	8.65372e+07
Tb927.6.5060	hypothetical protein, conserved	3		0.842899	0.0480268	23.8814	23.9179	24.0194	23.8418	23.6478	23.5799	1.54532e+07	1.58486e+07	1.7004e+07	1.5035e+07	1.31434e+07	1.25385e+07
Tb927.6.5090	hypothetical protein, conserved	6		1.41619	0.00278349	26.6787	26.8292	26.6432	27.316	27.1425	27.2	1.0742e+08	1.19234e+08	1.04812e+08	1.6709e+08	1.48149e+08	1.5418e+08
Tb927.6.560	cysteine peptidase C (CPC)	3		1.1817	0.00585948	25.6952	25.7828	25.6651	25.9008	25.9731	25.9927	5.43281e+07	5.77295e+07	5.32051e+07	6.26513e+07	6.58674e+07	6.67713e+07
Tb927.6.640	ApaH-like phosphatase ALPH1	12		0.778217	0.0148376	28.5258	28.7736	28.689	28.3924	28.2234	28.2932	3.86468e+08	4.58905e+08	4.32763e+08	3.52352e+08	3.13393e+08	3.28921e+08
Tb927.6.720	40S ribosomal protein L14, putative	10		0.849193	0.0272146	31.5975	31.5629	31.6242	31.4857	31.2562	31.3261	3.24923e+09	3.17244e+09	3.31009e+09	3.00713e+09	2.56487e+09	2.69213e+09
Tb927.6.820	Pumilio homology domain family member 4	14		1.3407	0.00154685	26.8616	27.0189	26.8749	27.3541	27.2991	27.3755	1.21943e+08	1.3599e+08	1.23068e+08	1.71556e+08	1.65136e+08	1.74116e+08
Tb927.6.870	myotubularin, putative	9		0.866584	0.0393463	26.5859	26.811	26.7406	26.5216	26.4851	26.52	1.00731e+08	1.1774e+08	1.12133e+08	9.63363e+07	9.39295e+07	9.62309e+07
Tb927.7.1070	KREX1	6		0.752202	0.0251292	25.9744	26.1606	26.3306	25.6905	25.7007	25.8577	6.59286e+07	7.50101e+07	8.43897e+07	5.41524e+07	5.45354e+07	6.08048e+07
Tb927.7.1110	asparagine synthetase a, putative	10		1.21191	0.0219454	30.808	30.9607	30.9191	31.2808	31.0713	31.1641	1.87988e+09	2.08977e+09	2.03036e+09	2.60898e+09	2.25624e+09	2.40626e+09
Tb927.7.1120	trypanothione/tryparedoxin dependent peroxidase 1, cytosolic	12		0.789833	0.0408891	31.0877	31.4185	31.3345	30.9615	30.8447	31.0277	2.28211e+09	2.87029e+09	2.70788e+09	2.09094e+09	1.92831e+09	2.18905e+09
Tb927.7.1130	trypanothione/tryparedoxin dependent peroxidase 2	7		0.797406	0.0472357	31.2285	31.5603	31.4661	31.1151	30.9901	31.1831	2.51607e+09	3.16658e+09	2.9664e+09	2.3259e+09	2.13276e+09	2.43815e+09
Tb927.7.1200	Protein of unknown function (DUF525), putative	6		0.756935	0.0150119	25.4313	25.6464	25.4522	25.0375	25.0373	25.2492	4.52463e+07	5.25211e+07	4.59071e+07	3.4439e+07	3.44324e+07	3.98808e+07
Tb927.7.1330	hypothetical protein, conserved	2		1.27543	0.00824526	23.2788	23.5215	23.3973	23.788	23.752	23.7199	1.01768e+07	1.20414e+07	1.10479e+07	1.44843e+07	1.41276e+07	1.38167e+07
Tb927.7.1370	spliced leader RNA PSE-promoter transcription factor, putative	6		1.21333	0.0235298	26.0765	26.1879	25.9914	26.4721	26.3074	26.3138	7.07615e+07	7.6444e+07	6.67094e+07	9.30909e+07	8.30442e+07	8.3414e+07
Tb927.7.1400	Tripartite Attachment Complex Protein 60	3		1.46026	0.039278	21.3674	21.847	21.2625	22.1687	22.0088	22.0012	2.70535e+06	3.77229e+06	2.51564e+06	4.71467e+06	4.22004e+06	4.19779e+06
Tb927.7.1660	hypothetical protein, conserved	4		1.3783	0.0111911	26.2992	26.1013	26.05	26.7555	26.5459	26.5393	8.25735e+07	7.19885e+07	6.94758e+07	1.13295e+08	9.79729e+07	9.75242e+07
Tb927.7.1730	60S ribosomal protein L7, putative	13		0.775456	0.04087	32.8815	33.2092	33.1452	32.6902	32.6091	32.8464	7.91272e+09	9.93057e+09	9.49963e+09	6.93001e+09	6.55093e+09	7.7223e+09
Tb927.7.1770	Mini-chromosome maintenance complex-binding protein	2		1.16982	0.0419783	24.9043	24.7632	24.7358	25.1387	24.9619	24.9806	3.13998e+07	2.84748e+07	2.79385e+07	3.69403e+07	3.26791e+07	3.31064e+07
Tb927.7.1780	Adenine phosphoribosyltransferase, putative	6		1.20425	0.0221677	30.3107	30.4073	30.4692	30.7281	30.5486	30.7126	1.33178e+09	1.42403e+09	1.48639e+09	1.77859e+09	1.57047e+09	1.75961e+09
Tb927.7.190	thimet oligopeptidase, putative	24		0.832859	0.0112788	32.6678	32.786	32.7382	32.5385	32.3736	32.4859	6.82299e+09	7.40594e+09	7.16445e+09	6.23814e+09	5.56462e+09	6.01491e+09
Tb927.7.210	Proline dehydrogenase, mitochondrial	18		0.789657	0.00785908	31.314	31.4516	31.4097	31.1309	30.9424	31.0767	2.66959e+09	2.93677e+09	2.85264e+09	2.35151e+09	2.06341e+09	2.2648e+09
Tb927.7.2120	hypothetical protein, conserved	11		0.692036	0.00438333	28.659	28.93	28.8856	28.3537	28.2342	28.3053	4.23845e+08	5.11441e+08	4.95954e+08	3.43016e+08	3.15758e+08	3.31695e+08
Tb927.7.2130	Uncharacterized conserved protein (DUF2036), putative	2		0.67245	0.0268387	22.7606	23.2262	23.1364	22.3122	22.5568	22.5637	7.10574e+06	9.81264e+06	9.22069e+06	5.20779e+06	6.16991e+06	6.19951e+06
Tb927.7.2160	hypothetical protein, conserved	10		0.730429	0.00574895	29.0764	29.1416	29.0859	28.7801	28.656	28.4951	5.66059e+08	5.92254e+08	5.69818e+08	4.60971e+08	4.22969e+08	3.78338e+08
Tb927.7.2170	Nucleolar protein 168	24		0.806297	0.0448917	29.7777	29.9781	29.9467	29.7319	29.4246	29.6057	9.20414e+08	1.05753e+09	1.03482e+09	8.91632e+08	7.20594e+08	8.16957e+08
Tb927.7.2200	mitochondrial import inner membrane translocase subunit tim9	3		0.735015	0.00684966	27.2566	27.4768	27.5166	27.0307	26.9664	26.932	1.60348e+08	1.86791e+08	1.92004e+08	1.37109e+08	1.31131e+08	1.28037e+08
Tb927.7.2220	hypothetical protein, conserved	8		1.20516	0.0331021	26.7858	27.0131	26.895	27.1202	27.1095	27.2748	1.15699e+08	1.35438e+08	1.24799e+08	1.45877e+08	1.44802e+08	1.62382e+08
Tb927.7.2240	hypothetical protein, conserved	18		0.713542	0.0173138	29.5841	29.7248	29.7249	29.4076	29.0115	29.1294	8.04805e+08	8.87262e+08	8.8736e+08	7.12129e+08	5.41155e+08	5.87245e+08
Tb927.7.2260	SEP domain containing protein, putative	4		0.725587	0.0117035	27.229	27.1897	27.4091	26.9329	26.658	26.8446	1.57307e+08	1.53077e+08	1.78225e+08	1.28122e+08	1.05891e+08	1.20516e+08
Tb927.7.2390	Tripartite attachment complex protein 102	17		0.79178	0.00831081	27.7861	27.9908	27.8969	27.546	27.4997	27.6221	2.31449e+08	2.66721e+08	2.49916e+08	1.95965e+08	1.89777e+08	2.06577e+08
Tb927.7.2410	Dynamin family, putative	11		0.680523	0.0018265	27.9302	28.0464	28.0978	27.4802	27.3648	27.5618	2.55753e+08	2.77215e+08	2.87255e+08	1.87223e+08	1.72837e+08	1.98121e+08
Tb927.7.2450	SUMO-interacting motif-containing protein	3		0.737035	0.00299208	25.6307	25.7284	25.7387	25.2128	25.1844	25.375	5.19515e+07	5.55918e+07	5.59915e+07	3.88873e+07	3.81296e+07	4.35139e+07
Tb927.7.2470	GTPase activating protein, putative	5		0.71483	0.0201189	25.493	25.6584	25.7745	24.9935	25.1296	25.342	4.72233e+07	5.29597e+07	5.73962e+07	3.34046e+07	3.67077e+07	4.25301e+07
Tb927.7.2520	Uncharacterised protein family UPF0066, putative	2		0.710219	0.00356642	24.4198	24.551	24.5496	24.1463	23.9307	23.9565	2.2443e+07	2.4581e+07	2.45561e+07	1.8568e+07	1.59908e+07	1.62786e+07
Tb927.7.2640	Cytoskeleton associated protein 51	21		0.775943	0.00764729	31.4305	31.614	31.6164	31.2088	31.1125	31.2462	2.89419e+09	3.28675e+09	3.29228e+09	2.48189e+09	2.32171e+09	2.54708e+09
Tb927.7.2700	NADH-cytochrome b5 reductase, putative	17		0.860471	0.0399038	31.2024	31.382	31.3231	31.1562	30.9914	31.1104	2.47086e+09	2.79849e+09	2.6866e+09	2.39297e+09	2.13471e+09	2.31819e+09
Tb927.7.2740	hypothetical protein, conserved	4		0.75972	0.0404707	25.9864	26.3087	26.1238	25.7511	25.9024	25.5757	6.64803e+07	8.31194e+07	7.31228e+07	5.64754e+07	6.27209e+07	5.00105e+07
Tb927.7.2750	calcium/calmodulin-dependent protein kinase, putative	5		0.760124	0.0187475	26.3443	26.2322	26.3876	26.082	25.7566	25.9246	8.51991e+07	7.88287e+07	8.7791e+07	7.10337e+07	5.66893e+07	6.36906e+07
Tb927.7.2800	Prp18 domain containing protein, putative	2		0.81975	0.0184725	25.0006	25.0477	24.8815	24.6194	24.6482	24.8004	3.35686e+07	3.46821e+07	3.09083e+07	2.57734e+07	2.62936e+07	2.92186e+07
Tb927.7.2820	histone H2A, putative	6		0.810824	0.0293997	34.7279	34.9564	34.9361	34.5942	34.4706	34.6528	2.84535e+10	3.3337e+10	3.28701e+10	2.59362e+10	2.38056e+10	2.70114e+10
Tb927.7.3040	F-box and WD40 domain containing protein	16		0.803394	0.0446847	29.1272	29.3295	29.3363	29.0666	28.7798	28.9936	5.86364e+08	6.74624e+08	6.77786e+08	5.62222e+08	4.60888e+08	5.3449e+08
Tb927.7.3180	adaptor complex AP-1 medium subunit, putative	11		1.18122	0.0256908	26.9203	27.0887	27.1274	27.3411	27.2822	27.2405	1.27002e+08	1.42728e+08	1.46614e+08	1.70014e+08	1.63217e+08	1.58564e+08
Tb927.7.3190	Pseudokinase, putative	4		1.33524	0.0103093	24.3571	24.5226	24.6025	24.9134	24.8144	25.0098	2.14885e+07	2.41011e+07	2.54745e+07	3.15996e+07	2.9504e+07	3.37839e+07
Tb927.7.3270	hypothetical protein, conserved	12		0.8267	0.00120713	27.0679	27.0028	27.0275	26.7732	26.7042	26.7962	1.40688e+08	1.34476e+08	1.36803e+08	1.14695e+08	1.09339e+08	1.16539e+08
Tb927.7.3290	WD domain, G-beta repeat, putative	8		1.12135	0.0429831	27.4326	27.4021	27.4103	27.6753	27.4848	27.5744	1.81145e+08	1.77357e+08	1.78368e+08	2.14339e+08	1.87827e+08	1.99852e+08
Tb927.7.3310	Radial spoke head 1 homolog, putative	3		1.39734	0.0153448	24.3476	24.5159	24.1402	24.9271	24.7783	24.7651	2.13486e+07	2.39887e+07	1.84893e+07	3.19003e+07	2.8774e+07	2.85132e+07
Tb927.7.3420	peptidyl-prolyl cis-trans isomerase, putative	4		0.826441	0.00827241	27.7065	27.8668	27.7375	27.5345	27.4427	27.512	2.1902e+08	2.44759e+08	2.23781e+08	1.94408e+08	1.82415e+08	1.91404e+08
Tb927.7.3460	LSU ribosomal protein, mitochondrial, putative	4		0.856331	0.0460836	25.2754	25.4155	25.391	25.0774	25.0609	25.2669	4.06124e+07	4.47527e+07	4.40007e+07	3.54034e+07	3.50022e+07	4.03743e+07
Tb927.7.3630	TPR-repeat-containing chaperone protein DNAJ, putative	11		1.27066	0.00576016	27.6135	27.775	27.7771	28.1054	27.999	28.1016	2.05351e+08	2.29678e+08	2.30005e+08	2.88776e+08	2.68242e+08	2.88013e+08
Tb927.7.3880	Basal body protein	10		0.794469	0.00144302	27.6538	27.7791	27.7612	27.3789	27.39	27.432	2.1117e+08	2.30326e+08	2.27483e+08	1.74527e+08	1.75877e+08	1.81078e+08
Tb927.7.3920	hypothetical protein, conserved	8		1.2343	0.00455159	27.1517	27.0498	27.0341	27.4553	27.3625	27.3286	1.49101e+08	1.3893e+08	1.37426e+08	1.84028e+08	1.72557e+08	1.68555e+08
Tb927.7.4330	Iguana/Dzip1-like DAZ-interacting protein N-terminal, putative	3		0.879816	0.00548141	25.1848	25.1812	25.2789	25.0387	25.0097	25.0442	3.81411e+07	3.80438e+07	4.07116e+07	3.44662e+07	3.3782e+07	3.45993e+07
Tb927.7.4380	Bromodomain, putative	3		0.675512	0.0122577	28.0083	28.2826	28.4307	27.6321	27.674	27.7466	2.69976e+08	3.26521e+08	3.61816e+08	2.08009e+08	2.14146e+08	2.25197e+08
Tb927.7.4440	NAD dependent epimerase/dehydratase family, putative	2		1.45923	0.00093516	25.8228	25.7944	25.7321	26.4384	26.2753	26.2662	5.9354e+07	5.81941e+07	5.57369e+07	9.09388e+07	8.12162e+07	8.07079e+07
Tb927.7.5080	ATP-NAD kinase-like protein	5		1.4731	0.0145306	24.2251	24.3191	24.3591	25	24.5977	24.9529	1.96097e+07	2.09307e+07	2.15183e+07	3.35541e+07	2.53883e+07	3.24759e+07
Tb927.7.5090	condensin complex subunit 2, putative	6		1.43653	0.0388557	25.0432	25.0692	24.5537	25.5311	25.3246	25.4268	3.45739e+07	3.52026e+07	2.46264e+07	4.84864e+07	4.20218e+07	4.51041e+07
Tb927.7.5310	YEATS family, putative	4		1.34338	0.0283719	24.4866	24.3507	24.4324	24.8872	24.6173	25.0177	2.35071e+07	2.13934e+07	2.26406e+07	3.10301e+07	2.57355e+07	3.39677e+07
Tb927.7.5320	hypothetical protein, conserved	7		0.821439	0.0191008	26.4704	26.5758	26.5931	26.3476	26.1344	26.3004	9.29819e+07	1.00023e+08	1.01233e+08	8.53945e+07	7.36614e+07	8.26427e+07
Tb927.7.540	chaperone protein DnaJ, putative	5		0.799956	0.000520798	26.1144	26.15	26.0983	25.8507	25.7565	25.7884	7.2649e+07	7.4463e+07	7.1842e+07	6.05128e+07	5.66855e+07	5.79553e+07
Tb927.7.5450	lipin	10		0.774189	0.0015799	26.0499	26.1956	26.0816	25.7027	25.7581	25.7619	6.94698e+07	7.68531e+07	7.10131e+07	5.46102e+07	5.67482e+07	5.69006e+07
Tb927.7.5660	Outer dynein arm docking complex protein 2, putative	18		1.18351	0.0396035	27.4798	27.6678	27.6309	27.9481	27.7651	27.7945	1.87172e+08	2.13228e+08	2.07835e+08	2.5895e+08	2.28096e+08	2.32805e+08
Tb927.7.570	prefoldin, putative	6		0.800193	0.0228436	28.3656	28.6343	28.5322	28.238	28.1096	28.2289	3.45848e+08	4.16666e+08	3.88199e+08	3.16585e+08	2.89614e+08	3.14593e+08
Tb927.7.580	GTP-binding protein, putative	4		1.39079	0.0163325	27.2029	26.997	27.0409	27.7507	27.4762	27.4285	1.54491e+08	1.33941e+08	1.38075e+08	2.25835e+08	1.8671e+08	1.80636e+08
Tb927.7.5840	hypothetical protein, conserved	4		0.844963	0.0361259	27.4809	27.5995	27.7449	27.3713	27.3862	27.3506	1.87315e+08	2.03363e+08	2.24937e+08	1.73614e+08	1.75414e+08	1.71145e+08
Tb927.7.6290	kinesin, putative	9		1.2292	0.0399942	26.734	26.9058	26.8563	27.2511	26.9668	27.1623	1.11616e+08	1.25734e+08	1.21496e+08	1.59731e+08	1.31166e+08	1.50198e+08
Tb927.7.6610	hypothetical protein, conserved	6		1.33097	0.0465351	26.0532	26.2655	26.3251	26.8316	26.427	26.6079	6.96308e+07	8.06673e+07	8.40682e+07	1.19432e+08	9.02254e+07	1.02278e+08
Tb927.7.6660	chaperone protein DnaJ, putative	6		0.791503	0.0490446	27.957	28.1892	28.2745	27.8362	27.666	27.9138	2.60554e+08	3.06053e+08	3.24685e+08	2.39631e+08	2.12965e+08	2.52863e+08
Tb927.7.6680	STE/STE11 serine/threonine-protein kinase, putative	11		1.43937	0.0132352	26.0168	26.3616	26.3998	26.8576	26.7514	26.7733	6.78937e+07	8.62261e+07	8.85357e+07	1.21599e+08	1.12972e+08	1.14701e+08
Tb927.7.6850	trans-sialidase	14		0.73319	0.00600246	28.9336	29.1013	29.1434	28.6707	28.5039	28.6629	5.12731e+08	5.75914e+08	5.92978e+08	4.27297e+08	3.8066e+08	4.24994e+08
Tb927.7.6910	Phosphatidylinositol 4-phosphate 5-kinase, putative	23		1.17194	0.0319834	29.6881	29.7434	29.7816	30.0887	29.8717	29.9323	8.65013e+08	8.98805e+08	9.22917e+08	1.14184e+09	9.82345e+08	1.02451e+09
Tb927.7.6980	Mono-functional DNA-alkylating methyl methanesulfonate N-term/CPSF A subunit region, putative	25		1.29161	0.00242666	27.7769	27.8451	27.8317	28.2841	28.1236	28.1491	2.29979e+08	2.411e+08	2.38872e+08	3.26863e+08	2.92452e+08	2.97663e+08
Tb927.7.7450	GTP-binding protein, putative	14		1.28439	0.0120688	27.2716	27.3742	27.5151	27.816	27.6659	27.7686	1.6202e+08	1.73958e+08	1.91808e+08	2.36285e+08	2.1295e+08	2.2865e+08
Tb927.7.7470	procyclic-enriched flagellar receptor adenylate cyclase 3	12		0.821634	0.0370056	28.6798	28.6646	28.6229	28.5511	28.2648	28.2837	4.30021e+08	4.25518e+08	4.13378e+08	3.93299e+08	3.22524e+08	3.26763e+08
Tb927.7.760	hypothetical protein, conserved	8		1.31244	0.0261073	25.8972	25.7955	25.9466	26.4712	26.1724	26.1541	6.24917e+07	5.82408e+07	6.46717e+07	9.303e+07	7.5629e+07	7.46726e+07
Tb927.8.1140	hypothetical protein, conserved	5		1.31789	0.0464972	26.1862	26.3503	26.3359	26.9313	26.5409	26.5667	7.63552e+07	8.55527e+07	8.47014e+07	1.27973e+08	9.76332e+07	9.93972e+07
Tb927.8.1160	vacuolar-type Ca2+-ATPase, putative	18		0.768542	0.00502615	28.7648	28.9711	28.9402	28.4877	28.5011	28.5554	4.56107e+08	5.2624e+08	5.15059e+08	3.76414e+08	3.79908e+08	3.94497e+08
Tb927.8.1250	Sel1 repeat, putative	7		1.28909	0.0443576	25.9555	26.1142	25.7646	26.3864	26.1584	26.3972	6.50683e+07	7.26364e+07	5.70061e+07	8.77211e+07	7.4898e+07	8.83797e+07
Tb927.8.1300	hypothetical protein, conserved	7		1.49469	0.00125565	25.517	25.6595	25.4909	26.2309	26.1068	26.0701	4.80154e+07	5.3002e+07	4.71555e+07	7.87578e+07	7.22666e+07	7.04489e+07
Tb927.8.1320	hypothetical protein, conserved	3		1.20672	0.026631	24.9431	25.1171	25.0553	25.3546	25.3827	25.1894	3.22579e+07	3.63916e+07	3.48653e+07	4.29032e+07	4.37483e+07	3.82617e+07
Tb927.8.1740	Mitochondrial import inner membrane translocase subunit TIM62	10		1.16882	0.0146459	29.2087	29.1223	29.1798	29.4662	29.303	29.4133	6.20448e+08	5.84351e+08	6.08128e+08	7.41669e+08	6.62335e+08	7.14981e+08
Tb927.8.1790	hypothetical protein, conserved	2		0.771074	0.0344234	28.2665	28.6214	28.5753	28.1623	28.0524	28.1461	3.22905e+08	4.12957e+08	3.99966e+08	3.00399e+08	2.78355e+08	2.97053e+08
Tb927.8.1960	CCR4-NOT transcription complex subunit 11	12		0.806054	0.0287216	29.6617	29.8779	29.7613	29.5838	29.3468	29.4352	8.49273e+08	9.8658e+08	9.10013e+08	8.04653e+08	6.82738e+08	7.25927e+08
Tb927.8.2120	hypothetical protein, conserved	5		1.17652	0.018298	25.9279	26.0163	25.9801	26.2945	26.1064	26.2223	6.38386e+07	6.78705e+07	6.61913e+07	8.23047e+07	7.22435e+07	7.82864e+07
Tb927.8.2130	cyclic nucleotide-binding domain containing protein, putative	5		1.45676	0.000755603	26.2991	26.2785	26.234	26.898	26.709	26.8275	8.25712e+07	8.14008e+07	7.89276e+07	1.25056e+08	1.09699e+08	1.19092e+08
Tb927.8.2330	hypothetical protein, conserved	2		0.705327	0.0200291	26.2684	26.2707	26.3903	25.93	25.5333	25.9239	8.08329e+07	8.09569e+07	8.79582e+07	6.39292e+07	4.85625e+07	6.36622e+07
Tb927.8.2400	hypothetical protein, conserved	3		1.35246	0.0421598	24.3992	24.5627	24.2276	24.8527	25.01	24.6276	2.21249e+07	2.47801e+07	1.96447e+07	3.02976e+07	3.37881e+07	2.59205e+07
Tb927.8.2580	exocyst complex component Sec10, putative	4		1.08132	0.0385338	24.1284	24.0491	24.0478	24.2086	24.1365	24.2187	1.83388e+07	1.73585e+07	1.73419e+07	1.93874e+07	1.84417e+07	1.95233e+07
Tb927.8.2630	kinesin-C	33		1.20943	0.0209375	30.6254	30.8198	30.7828	31.0801	30.9311	31.043	1.65638e+09	1.89529e+09	1.84735e+09	2.27001e+09	2.04733e+09	2.21241e+09
Tb927.8.2710	SET domain containing protein, putative	5		1.40505	0.0362522	24.345	24.0675	24.2814	24.9547	24.6876	24.5017	2.13092e+07	1.7581e+07	2.03904e+07	3.25169e+07	2.7021e+07	2.37545e+07
Tb927.8.2720	Putative serine esterase (DUF676), putative	4		1.33394	0.0377735	24.4059	24.4939	24.4361	25.0392	24.6014	24.9096	2.22291e+07	2.3627e+07	2.26987e+07	3.44791e+07	2.54535e+07	3.15157e+07
Tb927.8.2910	ER degradation-enhancing alpha-mannosidase-like protein 1, putative	11		0.861492	0.0291683	27.9509	27.9528	27.9973	27.8681	27.6503	27.7293	2.59454e+08	2.59792e+08	2.67927e+08	2.44978e+08	2.10648e+08	2.22517e+08
Tb927.8.2930	ER degradation-enhancing alpha-mannosidase-like protein 3, putative	8		0.8191	0.0436391	26.4252	26.5862	26.4829	26.3606	26.0541	26.2043	9.01103e+07	1.00748e+08	9.3786e+07	8.61634e+07	6.96719e+07	7.73164e+07
Tb927.8.2970	hypothetical protein, conserved	7		0.765428	0.00193046	28.1986	28.3222	28.2073	27.9271	27.8132	27.8314	3.08056e+08	3.35598e+08	3.09906e+08	2.55211e+08	2.35839e+08	2.38832e+08
Tb927.8.3280	Beta-lactamase superfamily domain containing protein, putative	6		1.28057	0.00168168	25.4471	25.4484	25.4186	25.8815	25.7738	25.7248	4.57438e+07	4.57862e+07	4.48483e+07	6.1819e+07	5.7369e+07	5.54542e+07
Tb927.8.3310	Elongator-like Protein 3b	7		1.31203	0.0213902	25.7102	25.9619	25.8423	26.3807	26.186	26.1213	5.48974e+07	6.53606e+07	6.01602e+07	8.73759e+07	7.63424e+07	7.29959e+07
Tb927.8.3350	DNA polymerase theta (helicase domain only), putative	4		0.720774	0.0282268	23.7221	23.4181	23.8332	23.074	23.2343	23.2717	1.38377e+07	1.12085e+07	1.49458e+07	8.83e+06	9.86801e+06	1.01272e+07
Tb927.8.3380	succinate dehydrogenase iron-sulfur subunit	6		1.36757	0.00891382	26.6037	26.8461	26.9082	27.2641	27.1944	27.2707	1.01978e+08	1.20636e+08	1.25942e+08	1.61184e+08	1.53574e+08	1.61915e+08
Tb927.8.3450	hypothetical protein, conserved	3		0.738555	0.0278165	25.1889	25.2085	25.3291	24.8543	24.5566	24.9763	3.82495e+07	3.87729e+07	4.21516e+07	3.03318e+07	2.46762e+07	3.30086e+07
Tb927.8.3820	Stress granule protein	5		0.745277	0.0193723	25.8754	25.8438	25.9529	25.5903	25.2421	25.5451	6.15559e+07	6.02212e+07	6.49511e+07	5.05189e+07	3.96841e+07	4.89613e+07
Tb927.8.4130	class I transcription factor A, subunit 5b	2		1.30972	0.0168969	25.9143	26.0192	26.1231	26.3911	26.5479	26.2804	6.32395e+07	6.80102e+07	7.30881e+07	8.80043e+07	9.81123e+07	8.15085e+07
Tb927.8.4240	hypothetical protein, conserved	13		1.23782	0.0392167	26.6228	26.7378	26.8381	27.1172	26.8788	27.121	1.0334e+08	1.11911e+08	1.19967e+08	1.4558e+08	1.23403e+08	1.45958e+08
Tb927.8.4330	small GTP-binding protein Rab11	9		0.797247	0.00761002	29.4715	29.5431	29.5468	29.2784	29.0728	29.223	7.44379e+08	7.82283e+08	7.84295e+08	6.51126e+08	5.64676e+08	6.26602e+08
Tb927.8.4400	Outer dynein arm docking complex protein 1, putative	19		1.1666	0.0127031	27.9636	28.1056	28.085	28.3266	28.2352	28.2617	2.61745e+08	2.8882e+08	2.84717e+08	3.36642e+08	3.15966e+08	3.21832e+08
Tb927.8.4420	hypothetical protein, conserved	3		1.22698	0.0252441	23.7869	23.8542	23.6878	23.9322	24.1296	24.1476	1.44731e+07	1.51649e+07	1.35129e+07	1.60074e+07	1.83539e+07	1.85841e+07
Tb927.8.4460	Domain of Unknown Function (DUF1042), putative	16		1.1426	0.0236109	27.7968	27.8345	27.8145	28.0913	27.9105	28.0155	2.33169e+08	2.39346e+08	2.3605e+08	2.85977e+08	2.52297e+08	2.71334e+08
Tb927.8.4870	Component of motile flagella 6	13		1.18987	0.043379	26.5049	26.4217	26.4025	26.8459	26.632	26.5927	9.52305e+07	8.9891e+07	8.87064e+07	1.2062e+08	1.03998e+08	1.01202e+08
Tb927.8.4900	hypothetical protein, conserved	2		1.19741	0.0153814	22.6049	22.4913	22.64	22.9299	22.7896	22.7963	6.37903e+06	5.89611e+06	6.5363e+06	7.99066e+06	7.25016e+06	7.28411e+06
Tb927.8.5020	hypothetical protein, conserved	5		1.28863	0.0349971	24.3343	24.49	24.4829	24.971	24.6142	24.8028	2.11519e+07	2.35633e+07	2.34474e+07	3.28874e+07	2.56808e+07	2.92681e+07
Tb927.8.5100	hypothetical protein, conserved	32		1.4034	0.0231957	28.5124	28.4847	28.5137	29.2441	28.8729	28.8231	3.82909e+08	3.75616e+08	3.83234e+08	6.35829e+08	4.91595e+08	4.74925e+08
Tb927.8.5130	Present in the outer mitochondrial membrane proteome 41	2		1.47626	0.007913	22.1956	21.9415	21.9551	22.7479	22.5431	22.4883	4.80321e+06	4.02749e+06	4.06583e+06	7.04351e+06	6.11148e+06	5.88367e+06
Tb927.8.5170	hypothetical protein, conserved	3		1.43188	0.0240791	22.2877	22.2779	21.8677	22.6917	22.7599	22.5673	5.11989e+06	5.08516e+06	3.82674e+06	6.77448e+06	7.10246e+06	6.21489e+06
Tb927.8.5240	Domain of unknown function DUF221, putative	3		1.25397	0.0303135	23.7564	23.9441	23.6341	24.0198	24.1471	24.1601	1.41708e+07	1.61398e+07	1.30186e+07	1.70096e+07	1.85778e+07	1.87461e+07
Tb927.8.5490	Nucleolar protein,Nop52, putative	7		0.868083	0.0447439	27.1675	27.2568	27.3157	27.0847	26.9297	27.1106	1.50744e+08	1.60372e+08	1.6705e+08	1.42334e+08	1.27837e+08	1.44916e+08
Tb927.8.5560	NADH dehydrogenase (ubiquinone) 1 beta subcomplex subunit, putative	9		0.741909	0.00122393	26.4004	26.3216	26.4709	25.908	26.0063	25.9886	8.85766e+07	8.38686e+07	9.30105e+07	6.29638e+07	6.74015e+07	6.65786e+07
Tb927.8.5760	Ankyrin repeats (many copies)/Alpha/beta hydrolase family, putative	13		1.34712	0.000946551	27.182	27.3044	27.2827	27.6867	27.6316	27.7414	1.52268e+08	1.65751e+08	1.63276e+08	2.16034e+08	2.07948e+08	2.24381e+08
Tb927.8.5770	Elongator-like Protein 3a	8		1.35849	0.000651745	26.0731	25.9579	25.9519	26.4535	26.3903	26.4672	7.05972e+07	6.5178e+07	6.49065e+07	9.18931e+07	8.79603e+07	9.27716e+07
Tb927.8.5980	TFIIH basal transcription factor complex helicase subunit, putative	4		1.20637	0.00523848	25.1762	25.2784	25.3166	25.5728	25.4842	25.5285	3.79123e+07	4.06972e+07	4.1789e+07	4.99095e+07	4.69354e+07	4.84008e+07
Tb927.8.6070	Trypanosome basal body component protein	13		1.43491	0.0103379	25.6393	25.8935	25.8812	26.4799	26.2194	26.2784	5.22636e+07	6.23322e+07	6.18037e+07	9.35923e+07	7.81329e+07	8.13922e+07
Tb927.8.6090	ubiquitin-protein ligase, putative	2		1.39135	0.0288578	24.426	24.2015	24.251	24.9956	24.7111	24.5792	2.25405e+07	1.92918e+07	1.99653e+07	3.34522e+07	2.74651e+07	2.50647e+07
Tb927.8.610	hypothetical protein, conserved	6		0.68279	0.0101191	25.6105	25.7302	25.7638	25.3218	24.9363	25.1735	5.12293e+07	5.56622e+07	5.69749e+07	4.19397e+07	3.21051e+07	3.78415e+07
Tb927.8.6180	60S ribosomal protein L26, putative	5		0.823117	0.0432272	29.9096	30.1507	30.1548	29.8754	29.7031	29.8023	1.00849e+09	1.19196e+09	1.1954e+09	9.84922e+08	8.74038e+08	9.3623e+08
Tb927.8.6430	hypothetical protein, conserved	3		0.772447	0.0059388	27.6879	27.8407	27.9098	27.4844	27.4374	27.4069	2.16218e+08	2.40379e+08	2.52159e+08	1.87768e+08	1.81759e+08	1.7795e+08
Tb927.8.6620	hypothetical protein, conserved	2		0.840937	0.0269376	25.133	25.1332	25.118	24.9709	24.7286	24.9237	3.67948e+07	3.67999e+07	3.64132e+07	3.28835e+07	2.78011e+07	3.18251e+07
Tb927.8.6640	Fatty acyl-CoA reductase, putative	9		0.68848	0.00278552	27.03	27.1292	27.1889	26.6986	26.4638	26.5649	1.37033e+08	1.46789e+08	1.52992e+08	1.08911e+08	9.25518e+07	9.92755e+07
Tb927.8.6790	hypothetical protein, conserved	3		1.29688	0.0461259	21.9741	22.0887	22.3947	22.5456	22.6167	22.4488	4.11964e+06	4.46025e+06	5.51421e+06	6.12197e+06	6.4315e+06	5.72482e+06
Tb927.8.6820	hypothetical protein, conserved	3		1.4161	0.00497506	24.9211	24.8265	24.7678	25.4661	25.1997	25.3473	3.17689e+07	2.97529e+07	2.85668e+07	4.63523e+07	3.85362e+07	4.26859e+07
Tb927.8.6830	kinesin, putative	3		1.35464	0.0164888	25.6803	25.6936	25.6033	26.2891	25.9346	26.0458	5.37708e+07	5.42681e+07	5.09767e+07	8.20015e+07	6.41354e+07	6.92721e+07
Tb927.8.6850	Zinc finger, C3HC4 type (RING finger)/EF-hand domain pair, putative	3		1.17174	0.0307893	26.1648	26.3748	26.3541	26.4866	26.5344	26.5666	7.52292e+07	8.70166e+07	8.57782e+07	9.40309e+07	9.71994e+07	9.93901e+07
Tb927.8.690	peptidyl-prolyl cis-trans isomerase	3		0.748911	0.00292699	26.6743	26.7018	26.707	26.3855	26.1637	26.2743	1.07091e+08	1.09158e+08	1.09548e+08	8.76621e+07	7.51711e+07	8.11603e+07
Tb927.8.6900	transport protein particle (TRAPP) component, putative	3		0.733163	0.0169354	26.0168	26.2305	26.2619	25.8182	25.7911	25.5543	6.78965e+07	7.87357e+07	8.04654e+07	5.91621e+07	5.80626e+07	4.92749e+07
Tb927.8.6970	3-methylcrotonyl-CoA carboxylase alpha subunit, putative	10		1.15138	0.0488523	27.4609	27.6438	27.5532	27.8486	27.677	27.7429	1.84731e+08	2.09707e+08	1.96948e+08	2.41698e+08	2.14587e+08	2.24625e+08
Tb927.8.7080	hypothetical protein, conserved	7		0.6851	0.0401003	25.4592	25.8703	25.6893	25.3058	24.8501	25.2161	4.61312e+07	6.13388e+07	5.41066e+07	4.14764e+07	3.02432e+07	3.89765e+07
Tb927.8.710	DRBD17	6		0.809572	0.00895751	25.284	25.4265	25.3774	25.122	24.9619	25.0884	4.08536e+07	4.50957e+07	4.35871e+07	3.65152e+07	3.26788e+07	3.5675e+07
Tb927.8.7150	UDP-Gal or UDP-GlcNAc-dependent glycosyltransferase, putative	3		0.759616	0.00824709	25.2111	25.3698	25.4161	24.8315	24.9818	24.996	3.88411e+07	4.33594e+07	4.47717e+07	2.98561e+07	3.31334e+07	3.34606e+07
Tb927.8.7490	symplekin	19		1.4027	0.00741133	26.7988	26.8013	26.7183	27.3957	27.0813	27.29	1.16743e+08	1.16949e+08	1.10411e+08	1.76569e+08	1.42001e+08	1.64102e+08
Tb927.8.7600	amino acid transporter, putative	5		0.749059	0.00410212	29.6824	29.821	29.8888	29.3906	29.3174	29.4387	8.61554e+08	9.48484e+08	9.94065e+08	7.03787e+08	6.68978e+08	7.27674e+08
Tb927.8.7640	amino acid transporter 1, putative	4		0.708254	0.00145264	29.7055	29.8146	29.8977	29.332	29.2491	29.3482	8.75501e+08	9.44284e+08	1.00027e+09	6.75812e+08	6.38068e+08	6.83432e+08
Tb927.8.7650	amino acid transporter, putative	6		0.731913	0.00280993	29.5651	29.6906	29.7755	29.2423	29.1699	29.274	7.94275e+08	8.66515e+08	9.19016e+08	6.35032e+08	6.0398e+08	6.49183e+08
Tb927.8.7700	amino acid transporter, putative	5		0.76283	0.0473392	28.8065	29.149	29.1593	28.7312	28.5112	28.7175	4.69472e+08	5.95278e+08	5.9955e+08	4.45599e+08	3.82588e+08	4.41392e+08
Tb927.8.7730	Sphingosine N-acyltransferase, putative	2		0.715755	0.0205154	25.4251	25.6024	25.8091	25.244	25.0214	25.1408	4.50518e+07	5.09431e+07	5.87908e+07	3.97368e+07	3.40569e+07	3.69949e+07
Tb927.8.7990	Thioredoxin-like/Protein of unknown function (DUF3638)/Protein of unknown function (DUF3645), putative	36		1.26326	0.00935445	28.313	28.5217	28.4257	28.805	28.68	28.7914	3.33485e+08	3.85388e+08	3.60577e+08	4.6898e+08	4.30061e+08	4.64581e+08
Tb927.8.810	radial spoke protein RSP9, putative	13		0.84132	0.0174478	29.2678	29.3681	29.3756	29.1465	28.9792	29.1346	6.4639e+08	6.92937e+08	6.96518e+08	5.9425e+08	5.29196e+08	5.89351e+08
Tb927.8.820	VID27 cytoplasmic protein, putative	14		0.694269	0.00175335	28.1298	28.1087	28.1837	27.7015	27.479	27.654	2.93706e+08	2.89442e+08	3.04891e+08	2.18272e+08	1.87074e+08	2.11192e+08
Tb927.8.840	hypothetical protein, conserved	3		0.705693	0.0300282	23.4007	23.4966	23.1756	22.8848	22.627	23.0411	1.10742e+07	1.18355e+07	9.47442e+06	7.74465e+06	6.47764e+06	8.6309e+06
Tb927.8.900	splicing factor TSR1	8		0.758463	0.0195914	29.9217	30.2235	30.2109	29.7213	29.6691	29.7865	1.01702e+09	1.25365e+09	1.24273e+09	8.85112e+08	8.53665e+08	9.26009e+08
Tb927.8.980	phosphoacetylglucosamine mutase	21		1.22896	0.0499893	30.6154	30.8513	30.8138	31.1719	30.9083	31.0911	1.64495e+09	1.93723e+09	1.88749e+09	2.41917e+09	2.01528e+09	2.28753e+09
Tb927.9.10050	60Kd inner membrane protein, putative	2		0.859496	0.0389624	25.299	25.4812	25.3655	25.2566	25.0924	25.1424	4.12805e+07	4.6839e+07	4.32304e+07	4.00868e+07	3.57726e+07	3.70352e+07
Tb927.9.10080	phosphatidylserine decarboxylase, putative	2		1.15389	0.00645906	24.5948	24.5836	24.5147	24.8312	24.7324	24.7482	2.53381e+07	2.51414e+07	2.39695e+07	2.98503e+07	2.78745e+07	2.81812e+07
Tb927.9.10100	SET domain-containing protein, putative	55		0.855117	0.0445425	32.4193	32.5238	32.4921	32.3596	32.1118	32.2774	5.74355e+09	6.17505e+09	6.04074e+09	5.51077e+09	4.64117e+09	5.2054e+09
Tb927.9.10250	small nuclear ribonucleoprotein Sm-F	2		0.789443	0.0192824	27.479	27.6678	27.6772	27.3754	27.2676	27.1582	1.87075e+08	2.13229e+08	2.14622e+08	1.74102e+08	1.61576e+08	1.49771e+08
Tb927.9.10570	predicted zinc finger protein	4		1.23128	0.0429409	26.3484	26.0653	26.2493	26.6454	26.4744	26.4498	8.54395e+07	7.02177e+07	7.97674e+07	1.04971e+08	9.32398e+07	9.16617e+07
Tb927.9.10820	hypothetical protein, conserved	5		0.687004	0.0150177	24.1055	23.8845	23.9236	23.5968	23.4694	23.205	1.80495e+07	1.5486e+07	1.59117e+07	1.26862e+07	1.16146e+07	9.66965e+06
Tb927.9.10830	metal dependent 5'-nucleotidase	5		0.715471	0.0191045	28.2864	28.5516	28.5767	28.0011	27.8337	28.1328	3.27385e+08	3.93438e+08	4.00346e+08	2.68636e+08	2.39208e+08	2.94321e+08
Tb927.9.11050	4E-interacting protein, putative	10		0.931852	0.0307192	27.8557	27.9276	27.9178	27.8414	27.7796	27.7748	2.42883e+08	2.55304e+08	2.53567e+08	2.4049e+08	2.30398e+08	2.29636e+08
Tb927.9.11220	tRNA import complex component, putative	10		0.862993	0.0148702	28.7966	28.9128	28.8245	28.5736	28.6179	28.7042	4.66289e+08	5.05388e+08	4.75382e+08	3.99507e+08	4.11963e+08	4.37333e+08
Tb927.9.11470	60S ribosomal protein L29	4		0.851589	0.0255754	29.2093	29.4017	29.3985	29.1192	29.0721	29.1304	6.20685e+08	7.09221e+08	7.07647e+08	5.83093e+08	5.64398e+08	5.87665e+08
Tb927.9.12090	Putative death-receptor fusion protein (DUF2428), putative	12		0.779854	0.028698	26.2383	26.3032	26.434	26.0322	25.7814	26.0756	7.91633e+07	8.28066e+07	9.06596e+07	6.86255e+07	5.76716e+07	7.0717e+07
Tb927.9.12100	Tetrapyrrole (Corrin/Porphyrin) Methylases, putative	3		1.15318	0.0379465	25.3049	25.4064	25.4985	25.5857	25.5594	25.685	4.14517e+07	4.44725e+07	4.74035e+07	5.03563e+07	4.94474e+07	5.39468e+07
Tb927.9.12110	6-phosphogluconate dehydrogenase, decarboxylating	18		1.45447	0.0131172	29.4441	29.5624	29.5551	30.2898	29.9325	29.9336	7.3041e+08	7.92821e+08	7.88782e+08	1.31265e+09	1.02467e+09	1.02544e+09
Tb927.9.12300	replication factor C, subunit 3, putative	14		1.16317	0.0194346	27.4555	27.521	27.533	27.8227	27.6807	27.6558	1.84049e+08	1.92591e+08	1.94203e+08	2.37393e+08	2.15136e+08	2.11457e+08
Tb927.9.12430	riboflavin kinase, putative	6		1.44494	0.0409198	25.7952	26.1604	25.9272	26.7649	26.3187	26.374	5.82293e+07	7.50019e+07	6.38047e+07	1.14039e+08	8.36972e+07	8.69699e+07
Tb927.9.12450	class I transcription factor A, subunit 2	5		0.753408	0.0189428	25.864	25.93	25.8696	25.2759	25.4946	25.6449	6.10702e+07	6.39321e+07	6.131e+07	4.06256e+07	4.72755e+07	5.2468e+07
Tb927.9.12500	Present in the outer mitochondrial membrane proteome 7	10		0.681026	0.000418117	27.9863	28.1178	28.1516	27.5431	27.5399	27.5151	2.6589e+08	2.91274e+08	2.98173e+08	1.95566e+08	1.9513e+08	1.91811e+08
Tb927.9.12510	ATP-dependent DEAD/H RNA helicase, putative	28		0.824148	0.0482502	31.5284	31.3683	31.4141	31.3297	31.0449	31.0873	3.09733e+09	2.77207e+09	2.86155e+09	2.69877e+09	2.21534e+09	2.28148e+09
Tb927.9.12570	glycerol kinase, glycosomal	31		0.844265	0.0491472	34.2805	34.4044	34.4212	34.2624	33.9993	34.1036	2.08671e+10	2.27384e+10	2.30051e+10	2.06064e+10	1.71721e+10	1.84585e+10
Tb927.9.13030	QA-SNARE protein putative	8		1.1531	0.0244572	27.7604	27.7601	27.8132	28.0592	27.875	28.0104	2.27356e+08	2.27313e+08	2.35829e+08	2.79678e+08	2.46153e+08	2.70378e+08
Tb927.9.13070	Heat shock factor binding 1 domain-containing protein	2		0.689553	0.0105581	27.6507	27.9675	27.993	27.2657	27.3947	27.3634	2.10717e+08	2.62453e+08	2.67142e+08	1.61361e+08	1.76453e+08	1.72671e+08
Tb927.9.13100	ankyrin repeat protein, putative	3		1.18869	0.0231881	26.51	26.6545	26.5542	26.9176	26.728	26.8189	9.55686e+07	1.05637e+08	9.8537e+07	1.26763e+08	1.11157e+08	1.1838e+08
Tb927.9.1340	Myosin-like protein 2	16		1.39723	0.00589968	26.6115	26.8481	26.6915	27.3162	27.1501	27.1357	1.02535e+08	1.20806e+08	1.08379e+08	1.67105e+08	1.48934e+08	1.47452e+08
Tb927.9.13480	Eukaryotic protein of unknown function (DUF1764), putative	2		0.758852	0.0428178	24.684	24.917	24.7193	24.1355	24.4848	24.489	2.69534e+07	3.16775e+07	2.76225e+07	1.84288e+07	2.34782e+07	2.35465e+07
Tb927.9.13610	helicase, putative	7		0.689973	0.0494471	25.2326	24.9929	25.0131	24.1599	24.7053	24.7132	3.94239e+07	3.33898e+07	3.38606e+07	1.87437e+07	2.73542e+07	2.75045e+07
Tb927.9.1410	SUMO-interacting motif-containing protein	3		1.3635	0.0443956	23.6073	24.156	23.9263	24.3642	24.3954	24.323	1.27796e+07	1.86929e+07	1.59413e+07	2.15946e+07	2.20679e+07	2.09864e+07
Tb927.9.14120	NLI interacting factor-like phosphatase, putative	6		1.2795	0.0296891	25.2294	25.2442	25.2092	25.7716	25.4138	25.5415	3.93385e+07	3.97433e+07	3.87914e+07	5.72813e+07	4.47003e+07	4.88376e+07
Tb927.9.14470	ubiquitin carboxyl-terminal hydrolase, putative	10		1.23313	0.0243104	26.9019	27.1158	26.9208	27.3844	27.2093	27.2559	1.25391e+08	1.45439e+08	1.2705e+08	1.75195e+08	1.55173e+08	1.60269e+08
Tb927.9.15110	60S ribosomal protein L5, putative	11		0.80521	0.0287978	31.8855	32.1358	32.1533	31.7409	31.6996	31.8095	3.96736e+09	4.71894e+09	4.7765e+09	3.5889e+09	3.48775e+09	3.76374e+09
Tb927.9.15210	ribosomal protein L36, putative	8		0.88231	0.00873198	32.434	32.502	32.4176	32.3221	32.2282	32.2612	5.80219e+09	6.0825e+09	5.73699e+09	5.36948e+09	5.03087e+09	5.14744e+09
Tb927.9.1530	hypothetical protein, conserved	5		1.49296	0.0434087	25.053	25.1701	24.7606	25.8672	25.4672	25.3636	3.48107e+07	3.77532e+07	2.84236e+07	6.12084e+07	4.6388e+07	4.31735e+07
Tb927.9.1560	DnaJ domain containing protein, putative	11		1.17705	0.0162759	26.482	26.5199	26.5933	26.8564	26.6891	26.7524	9.37272e+07	9.62214e+07	1.01248e+08	1.21503e+08	1.08195e+08	1.13055e+08
Tb927.9.2240	Pseudokinase, putative	5		1.22246	0.0301589	25.9438	26.1615	26.2271	26.4386	26.3546	26.4222	6.45433e+07	7.50592e+07	7.85497e+07	9.09509e+07	8.58081e+07	8.99232e+07
Tb927.9.2390	hypothetical protein, conserved	9		0.754468	0.023237	28.567	28.8582	28.891	28.3862	28.2888	28.4393	3.97672e+08	4.8662e+08	4.97805e+08	3.50838e+08	3.27919e+08	3.63992e+08
Tb927.9.2420	hypothetical protein, conserved	1		1.2215	0.00382478	24.4145	24.4608	24.5074	24.7658	24.6736	24.8076	2.23612e+07	2.30909e+07	2.38485e+07	2.85263e+07	2.67598e+07	2.93645e+07
Tb927.9.2520	microtubule-associated protein	17		1.40978	0.0072638	30.1135	30.2788	30.3077	30.8719	30.6093	30.7002	1.16161e+09	1.30269e+09	1.32896e+09	1.96505e+09	1.63804e+09	1.7446e+09
Tb927.9.2550	Domain of unknown function (DUF4457), putative	7		1.34796	0.0256324	25.7806	25.4756	25.4395	26.1004	25.8813	26.0228	5.76431e+07	4.66559e+07	4.55039e+07	7.19452e+07	6.18066e+07	6.81768e+07
Tb927.9.2670	Engulfment and cell motility domain-containing protein	7		1.38806	0.00672033	26.3085	26.2448	26.2506	26.9097	26.6208	26.6769	8.31093e+07	7.95171e+07	7.9839e+07	1.26074e+08	1.03195e+08	1.07288e+08
Tb927.9.3670	Endonuclease/Exonuclease/phosphatase family, putative	5		1.35945	0.00759221	24.7804	24.8169	25.0539	25.3855	25.3058	25.3029	2.88176e+07	2.95546e+07	3.48307e+07	4.3833e+07	4.14773e+07	4.13947e+07
Tb927.9.3870	hypothetical protein, conserved	4		1.20671	0.0012632	24.2384	24.2067	24.2148	24.4702	24.5531	24.4479	1.97921e+07	1.93619e+07	1.94705e+07	2.32408e+07	2.46164e+07	2.28857e+07
Tb927.9.3970	nicotinamidase, putative	6		0.814957	0.0494319	27.227	27.4361	27.5534	27.1889	27.0454	27.1118	1.57087e+08	1.81592e+08	1.96975e+08	1.52994e+08	1.38511e+08	1.4503e+08
Tb927.9.4080	Stumpy formation signalling pathway protein, putative	14		1.26721	0.00380424	26.6672	26.7168	26.5359	27.0156	26.953	26.9817	1.06572e+08	1.10298e+08	9.72993e+07	1.35679e+08	1.29919e+08	1.32522e+08
Tb927.9.4300	PRP3, putative	6		1.08566	0.0339032	25.8569	25.8139	25.8653	25.903	25.9678	26.0193	6.07738e+07	5.89865e+07	6.11277e+07	6.27444e+07	6.56262e+07	6.80116e+07
Tb927.9.4310	tricarboxylate carrier, putative	9		1.26873	0.0101423	30.0492	30.1829	30.2061	30.5599	30.3771	30.5297	1.11098e+09	1.21889e+09	1.23864e+09	1.58282e+09	1.39454e+09	1.55013e+09
Tb927.9.4910	3-phosphoinositide-dependent protein kinase 1, putative	4		0.67763	0.0128297	23.799	24.044	23.9977	23.1679	23.4529	23.5232	1.45957e+07	1.72973e+07	1.67506e+07	9.42414e+06	1.14823e+07	1.2056e+07
Tb927.9.4960	hypothetical protein, conserved	2		1.2369	0.0388248	28.1523	28.0328	28.1987	28.5736	28.4465	28.2733	2.9833e+08	2.74609e+08	3.08079e+08	3.99505e+08	3.65812e+08	3.24417e+08
Tb927.9.5170	phosphomevalonate kinase protein, putative	6		1.26779	0.022969	25.534	25.8427	25.5834	25.9759	25.9979	26.0321	4.85831e+07	6.01746e+07	5.02784e+07	6.59952e+07	6.7011e+07	6.86179e+07
Tb927.9.6350	inositol-1(or 4)-monophosphatase, putative	4		1.39828	0.000827002	23.8494	23.8053	23.8775	24.2363	24.4049	24.338	1.51145e+07	1.46593e+07	1.54113e+07	1.97633e+07	2.22123e+07	2.12058e+07
Tb927.9.6380	hypothetical protein, conserved	3		0.688377	0.0337944	24.9256	25.4082	25.233	24.575	24.561	24.8381	3.18683e+07	4.45276e+07	3.94345e+07	2.49921e+07	2.47506e+07	2.99924e+07
Tb927.9.6430	Rab geranylgeranyl transferase component A, putative	11		0.756173	0.0134324	27.5848	27.8611	27.7045	27.3313	27.2216	27.396	2.01305e+08	2.438e+08	2.18723e+08	1.68865e+08	1.56497e+08	1.76607e+08
Tb927.9.6620	hypothetical protein, conserved	6		0.69843	0.00605002	26.2016	26.2928	26.342	25.6557	25.6791	25.9347	7.71722e+07	8.22074e+07	8.50635e+07	5.28618e+07	5.37248e+07	6.41398e+07
Tb927.9.6650	tRNA synthetases class II (A)/Threonyl and Alanyl tRNA synthetase second additional domain containing protein, putative	8		0.860923	0.0184238	26.9373	27.0742	27.0506	26.7375	26.812	26.8652	1.28511e+08	1.41298e+08	1.39004e+08	1.11893e+08	1.17822e+08	1.22242e+08
Tb927.9.6760	hypothetical protein, conserved	6		1.45205	0.00371299	25.2816	25.5041	25.3911	25.9393	25.8207	26.0319	4.07874e+07	4.75876e+07	4.40024e+07	6.43441e+07	5.92674e+07	6.86073e+07
Tb927.9.7070	exosome complex exonuclease RRP40	4		0.688197	0.0263311	24.5049	24.8538	24.9621	24.212	24.1448	24.3754	2.38069e+07	3.03207e+07	3.26847e+07	1.94323e+07	1.85485e+07	2.17632e+07
Tb927.9.7080	hypothetical protein, conserved	5		0.702265	0.0112537	26.9047	27.1778	27.1946	26.465	26.6066	26.6852	1.25642e+08	1.51821e+08	1.53601e+08	9.2634e+07	1.02182e+08	1.07904e+08
Tb927.9.7520	hypothetical protein, conserved	13		1.36397	0.0162907	28.9058	29.0192	29.0182	29.6215	29.2708	29.3743	5.02922e+08	5.44071e+08	5.43678e+08	8.25964e+08	6.47742e+08	6.95917e+08
Tb927.9.7550	adenylosuccinate lyase, putative	20		0.779156	0.0218204	29.4304	29.6715	29.6615	29.3077	29.1148	29.2664	7.23474e+08	8.55096e+08	8.49182e+08	6.64508e+08	5.81349e+08	6.4574e+08
Tb927.9.7650	ADP-ribosylation factor, putative	2		0.826903	0.0380608	25.4185	25.5918	25.5915	25.3854	25.1462	25.2443	4.48453e+07	5.05717e+07	5.05586e+07	4.38283e+07	3.71324e+07	3.97469e+07
Tb927.9.7670	hypothetical protein, conserved	8		0.774083	0.0119214	28.4306	28.5574	28.5824	28.2934	28.0787	28.0841	3.61798e+08	3.95044e+08	4.01947e+08	3.2898e+08	2.83476e+08	2.84541e+08
Tb927.9.7720	predicted tetratricopeptide repeat protein	29		0.869474	0.0460398	29.3989	29.5501	29.4933	29.3288	29.1673	29.3385	7.07876e+08	7.86053e+08	7.55736e+08	6.743e+08	6.02892e+08	6.78833e+08
Tb927.9.7770	spermidine synthase	7		0.742651	0.00154041	31.7812	31.8208	31.7855	31.4698	31.2861	31.338	3.6906e+09	3.79328e+09	3.70156e+09	2.97402e+09	2.61842e+09	2.71444e+09
Tb927.9.8070	QM-like protein	15		0.788162	0.00857263	32.8642	32.9956	33.0428	32.654	32.5322	32.6874	7.81804e+09	8.56395e+09	8.84853e+09	6.75803e+09	6.21108e+09	6.91661e+09
Tb927.9.8180	hypothetical protein, conserved	11		1.20236	0.0379049	27.6371	27.87	27.8208	28.1019	27.9407	28.0878	2.08742e+08	2.45297e+08	2.37085e+08	2.88076e+08	2.57631e+08	2.85274e+08
Tb927.9.8350	hypothetical protein, conserved	6		1.13738	0.0129876	27.2089	27.2625	27.1483	27.3362	27.4278	27.4135	1.55131e+08	1.61007e+08	1.48751e+08	1.69436e+08	1.80548e+08	1.78772e+08
Tb927.9.8450	UMP/CMP kinase	9		0.742725	0.0249154	26.9047	27.2185	27.1373	26.8095	26.548	26.6209	1.25635e+08	1.56161e+08	1.47617e+08	1.17618e+08	9.81182e+07	1.03199e+08
Tb927.9.8720	fructose-1,6-bisphosphatase	11		0.826325	0.030614	31.0093	31.0382	31.1436	30.8941	30.6434	30.8201	2.16142e+09	2.2051e+09	2.37223e+09	1.99547e+09	1.67723e+09	1.89569e+09
Tb927.9.8740	Double RNA binding domain protein 3	10		0.842691	0.0476403	30.9254	30.9997	30.9617	30.8646	30.5652	30.7016	2.03925e+09	2.147e+09	2.09123e+09	1.9551e+09	1.58865e+09	1.74622e+09
Tb927.9.8810	hypothetical protein, conserved	5		1.11943	0.0465825	26.5383	26.5494	26.628	26.7899	26.6353	26.7754	9.74564e+07	9.82124e+07	1.03712e+08	1.16029e+08	1.04241e+08	1.14867e+08
Tb927.9.8950	metallo- peptidase, Clan M- Family M48	11		0.707649	0.0155173	30.3018	30.3105	30.5197	30.0781	29.7755	29.7703	1.32355e+09	1.33155e+09	1.53941e+09	1.1335e+09	9.19022e+08	9.15726e+08
Tb927.9.8990	Ankyrin repeats (3 copies), putative	10		0.722248	0.00331091	29.5006	29.6806	29.5506	29.1974	29.0164	29.1102	7.59591e+08	8.6053e+08	7.86369e+08	6.15604e+08	5.43002e+08	5.79478e+08
Tb927.9.9000	isopentenyl-diphosphate delta-isomerase (type II)	9		0.8018	0.030375	28.5245	28.6668	28.4925	28.4009	28.1336	28.1851	3.86123e+08	4.26168e+08	3.77644e+08	3.54422e+08	2.94487e+08	3.05181e+08
Tb927.9.9060	Lsm12 protein, putative	11		0.777869	0.0148629	29.8237	29.8504	29.8497	29.6185	29.3107	29.4911	9.50199e+08	9.68009e+08	9.6749e+08	8.24236e+08	6.65867e+08	7.54593e+08
Tb927.9.9100	hypothetical protein, conserved	4		0.925257	0.0497662	29.328	29.4252	29.3473	29.3091	29.2308	29.2248	6.73908e+08	7.20904e+08	6.83007e+08	6.65138e+08	6.29999e+08	6.27379e+08
Tb927.9.9120	tRNA (guanine-N(7)-)-methyltransferase, putative	4		0.717634	0.019425	24.6856	24.6442	24.6337	24.418	24	24.0747	2.69845e+07	2.62201e+07	2.60306e+07	2.24158e+07	1.67775e+07	1.76685e+07
Tb927.9.9150	GTP-binding protein, putative	3		0.726741	0.000950628	23.1669	23.1341	23.0303	22.7151	22.6075	22.6285	9.41726e+06	9.20587e+06	8.56653e+06	6.88542e+06	6.39034e+06	6.48407e+06
Tb927.9.9220	ribonuclease P	2		0.74081	0.0238843	25.3131	25.3886	25.1751	24.7162	24.7822	25.0638	4.16872e+07	4.39271e+07	3.78836e+07	2.75629e+07	2.88532e+07	3.50723e+07
Tb927.9.9230	hypothetical protein, conserved	3		0.77738	0.00532578	26.5059	26.3594	26.464	26.1789	26.028	26.0312	9.5295e+07	8.60961e+07	9.25676e+07	7.59678e+07	6.84258e+07	6.85765e+07
Tb927.9.9270	hypothetical protein, conserved	3		0.696734	0.00331452	23.6248	23.8692	23.7409	23.1396	23.2597	23.2782	1.29353e+07	1.53233e+07	1.40191e+07	9.24076e+06	1.00432e+07	1.01724e+07
Tb927.9.9550	EnigmRBP2	5		0.691677	0.0301438	27.3642	27.8638	27.7443	27.1497	27.0563	27.2124	1.72756e+08	2.44257e+08	2.24839e+08	1.48894e+08	1.39556e+08	1.55505e+08
Tb927.9.9740	AMP deaminase, putative	9		1.35975	0.0447172	25.8818	25.6448	25.6496	26.4193	26.0256	26.0386	6.18301e+07	5.24633e+07	5.26369e+07	8.97447e+07	6.83108e+07	6.89285e+07
Tb927.9.9860	170 kDa glucose-regulated protein, putative	26		1.28744	0.00806	29.9833	30.0745	29.9794	30.507	30.2902	30.3261	1.06139e+09	1.13064e+09	1.05853e+09	1.52585e+09	1.31295e+09	1.3461e+09
Tb927.11.8870	REH1	19		0.944137	0.422776	28.8148	29.0655	28.9963	28.9568	28.7814	28.8956	4.72185e+08	5.61823e+08	5.35479e+08	5.21016e+08	4.61396e+08	4.99399e+08
Tb05.5K5.110	major vault protein, putative	27		0.949858	0.454262	29.5561	29.7623	29.725	29.6846	29.4815	29.6548	7.8936e+08	9.10659e+08	8.87372e+08	8.62867e+08	7.49564e+08	8.45225e+08
TB05.5K5.80	calcium/calmodulin-dependent protein kinase, putative	3		1.20967	0.163924	23.2938	23.2634	22.9239	23.5306	23.216	23.5619	1.02831e+07	1.00689e+07	7.95735e+06	1.21177e+07	9.7435e+06	1.23838e+07
Tb06.3A7.270	hypothetical protein, conserved	2		0.903864	0.397324	24.946	25.3102	25.1933	25.1902	24.8046	25.0152	3.23225e+07	4.16031e+07	3.83652e+07	3.82824e+07	2.93043e+07	3.3909e+07
Tb07.11L3.100	SUMO-interacting motif-containing protein	1		0.985581	0.792792	20.8596	20.9245	20.8229	20.0532	21.1557	21.0956	1.90269e+06	1.99016e+06	1.85495e+06	1.08793e+06	2.33618e+06	2.24081e+06
Tb08.27P2.640	variant surface glycoprotein, degenerate	2		0.774616	0.0883027	28.1188	28.5987	28.4885	27.9499	28.0137	28.1706	2.9147e+08	4.06519e+08	3.76603e+08	2.5927e+08	2.71004e+08	3.02122e+08
Tb09.v4.0109	hypothetical protein	2		1.37782	0.807643	23.4279	23.3378	23.0056	24.6791	23.0761	22.5293	1.12852e+07	1.06017e+07	8.42142e+06	2.68632e+07	8.84273e+06	6.05355e+06
Tb10.v4.0039	hypothetical protein, conserved	4		1.83468	0.055983	27.9446	27.6029	27.2735	28.9712	28.1999	28.2124	2.58317e+08	2.03852e+08	1.62239e+08	5.26246e+08	3.08324e+08	3.11015e+08
Tb10.v4.0040	mRNA capping methyltransferase, putative	5		1.12292	0.167185	26.763	27.0038	26.9986	27.1347	26.9699	27.1678	1.13886e+08	1.34573e+08	1.34084e+08	1.47351e+08	1.31443e+08	1.50771e+08
Tb10.v4.0041	PUB domain containing protein, putative	5		1.05017	0.465765	26.5703	26.6228	26.6703	26.7251	26.5383	26.8011	9.96455e+07	1.03339e+08	1.06796e+08	1.10929e+08	9.74625e+07	1.16931e+08
Tb10.v4.0052	microtubule-associated protein 2	16		0.816186	0.0921468	33.508	33.8405	33.7922	33.2654	33.4708	33.5338	1.22157e+10	1.53819e+10	1.48749e+10	1.03246e+10	1.19048e+10	1.2436e+10
Tb10.v4.0056	variant surface glycoprotein (VSG), putative	2		1.15152	0.05794	25.6808	25.9257	25.901	26.0208	26.0468	26.0625	5.37871e+07	6.37407e+07	6.26563e+07	6.80825e+07	6.93237e+07	7.00787e+07
Tb10.v4.0063	variant surface glycoprotein (VSG, pseudogene), putative	1		1.13434	0.308378	26.2772	26.6375	26.5938	26.8914	26.5286	26.6357	8.13267e+07	1.044e+08	1.01278e+08	1.24488e+08	9.68043e+07	1.0427e+08
Tb11.02.5090.1-p1	trimethylguanosine synthase	2		1.11837	0.131199	23.55	23.7639	23.8148	23.8262	23.8626	23.9352	1.22815e+07	1.42441e+07	1.47557e+07	1.48734e+07	1.52533e+07	1.60408e+07
Tb11.02.5105	Present in the outer mitochondrial membrane proteome 15	2		0.953455	0.79116	23.6599	23.101	23.0486	23.6824	23.1436	22.6884	1.32539e+07	8.99664e+06	8.67622e+06	1.34617e+07	9.2664e+06	6.75916e+06
Tb11.02.5380.1-p1	exosome complex exonuclease RRP44p homologue	12		1.07161	0.513572	27.4896	27.9206	27.8981	27.9794	27.7614	27.8978	1.88446e+08	2.54054e+08	2.50126e+08	2.64622e+08	2.2752e+08	2.50084e+08
Tb11.02.5400	cystathionine beta-synthase, putative	17		1.01466	0.895591	30.9524	31.0903	30.9981	31.2275	30.9471	30.9115	2.07782e+09	2.28613e+09	2.14464e+09	2.51423e+09	2.07011e+09	2.01966e+09
Tb11.02.5420b.1-p1	NADPH-cytochrome p450 reductase, putative	14		0.979485	0.786727	29.1942	29.4679	29.3869	29.3588	29.235	29.375	6.14231e+08	7.4252e+08	7.02009e+08	6.8846e+08	6.31842e+08	6.96223e+08
Tb11.0350	hypothetical protein	4		1.29993	0.0991469	26.063	26.15	26.5635	26.6008	26.5101	26.8325	7.01064e+07	7.44636e+07	9.91783e+07	1.01771e+08	9.55757e+07	1.19509e+08
Tb11.0400	P27 protein, putative	8		1.05292	0.594579	29.0636	29.1792	29.1001	29.39	29.0156	29.1373	5.61049e+08	6.07888e+08	5.75459e+08	7.03529e+08	5.42699e+08	5.90472e+08
Tb11.0860	hypothetical protein	3		2.16213	0.0789399	20.4522	21.0528	21.1768	22.6512	21.8156	21.3388	1.43456e+06	2.17532e+06	2.37049e+06	6.58702e+06	3.69099e+06	2.65232e+06
Tb11.1780.1-p1	retrotransposon hot spot protein 1 (RHS1, pseudogene), putative	7		1.43125	0.103991	28.0619	27.9923	27.8639	28.8932	28.3191	28.1572	2.80202e+08	2.67001e+08	2.44274e+08	4.98572e+08	3.34881e+08	2.99344e+08
Tb11.v5.0152.1-p1	ribosomal RNA processing protein 4, putative	2		1.03959	0.859693	24.7865	24.5994	24.6189	25.06	24.5543	24.497	2.89392e+07	2.54181e+07	2.57651e+07	3.49798e+07	2.46365e+07	2.36779e+07
Tb11.v5.0154.1-p1	WD domain, G-beta repeat, putative	23		0.959941	0.618023	29.4331	29.7398	29.6932	29.5659	29.5269	29.6135	7.24845e+08	8.96516e+08	8.6804e+08	7.94717e+08	7.73543e+08	8.21417e+08
Tb11.v5.0162.1-p1	proteasome beta 6 subunit	8		0.913079	0.283763	29.1647	29.3239	29.3157	29.3133	28.9816	29.1016	6.01796e+08	6.72002e+08	6.68199e+08	6.67067e+08	5.30085e+08	5.76044e+08
Tb11.v5.0164.1-p1	Trm112p-like protein, putative	3		0.909209	0.373309	27.796	28.2016	28.0988	27.8818	27.8477	27.9817	2.33034e+08	3.08696e+08	2.8746e+08	2.47315e+08	2.41537e+08	2.65055e+08
Tb11.v5.0194.1-p1	hypothetical protein, conserved	9		0.972732	0.653092	27.2201	27.4346	27.3895	27.3637	27.2213	27.3443	1.56343e+08	1.81396e+08	1.75822e+08	1.72699e+08	1.56467e+08	1.70391e+08
Tb11.v5.0196.1-p1	Proteasome subunit A N-terminal signature/Proteasome subunit, putative	12		0.899223	0.150849	30.4861	30.7269	30.6573	30.5167	30.3794	30.5206	1.50398e+09	1.77707e+09	1.69344e+09	1.53618e+09	1.39669e+09	1.5403e+09
Tb11.v5.0219.1-p1	methyltransferase, putative	5		1.12337	0.645885	25.5661	25.4699	25.2844	26.058	25.3682	25.2802	4.96778e+07	4.6472e+07	4.08664e+07	6.98608e+07	4.33115e+07	4.07472e+07
Tb11.v5.0282.1-p1	expression site-associated gene (ESAG) protein, putative	3		1.30555	0.0707282	25.6208	25.8056	25.9185	26.4155	26.0414	26.0226	5.1598e+07	5.86497e+07	6.34224e+07	8.95064e+07	6.90603e+07	6.81691e+07
Tb11.v5.0325.1-p1	retrotransposon hot spot (RHS) protein, putative	11		0.994437	0.903229	29.9217	30.0273	30.0623	30.0823	29.9012	30.0017	1.017e+09	1.09429e+09	1.12114e+09	1.13676e+09	1.00266e+09	1.07503e+09
Tb11.v5.0326.1-p1	retrotransposon hot spot (RHS) protein, putative	5		1.01416	0.907532	29.1885	29.2702	29.2818	29.4416	29.0811	29.258	6.11824e+08	6.47451e+08	6.52697e+08	7.29115e+08	5.67915e+08	6.42012e+08
Tb11.v5.0348.1-p1	hypothetical protein, conserved	13		1.02256	0.73374	28.4097	28.6086	28.5928	28.6668	28.4554	28.5859	3.56587e+08	4.09308e+08	4.04849e+08	4.26167e+08	3.6808e+08	4.0291e+08
Tb11.v5.0365.1-p1	hypothetical protein, conserved	14		0.847472	0.0510124	29.0382	29.2334	29.2348	29.0197	28.826	28.9466	5.51259e+08	6.31145e+08	6.31764e+08	5.4424e+08	4.75861e+08	5.17357e+08
Tb11.v5.0396.1-p1	potassium voltage-gated channel, putative	3		0.992469	0.907555	25.7056	25.9626	25.9253	25.9964	25.5567	25.9794	5.47223e+07	6.53922e+07	6.37221e+07	6.69396e+07	4.93559e+07	6.61566e+07
Tb11.v5.0397.1-p1	ATP-dependent zinc metallopeptidase, putative	5		1.19157	0.158789	24.7917	24.9806	24.5513	25.1698	24.8823	25.0475	2.90432e+07	3.31065e+07	2.45848e+07	3.7746e+07	3.09259e+07	3.46782e+07
Tb11.v5.0422.1-p1	SET domain containing protein, putative	9		0.98931	0.997797	27.6347	28.1819	28.0886	28.0723	27.8457	27.9888	2.08393e+08	3.04502e+08	2.85444e+08	2.82228e+08	2.41212e+08	2.66364e+08
Tb11.v5.0482.1-p1	hypothetical protein, conserved	2		0.631677	0.237303	22.1338	23.3724	22.3508	21.749	22.1234	22.2684	4.60199e+06	1.08589e+07	5.34881e+06	3.52443e+06	4.56876e+06	5.05182e+06
Tb11.v5.0487.1-p1	Programmed cell death protein 2, C-terminal putative domain containing protein, putative	2		1.16639	0.244825	24.6901	25.1201	25.2418	25.3603	25.1928	25.2155	2.70684e+07	3.64686e+07	3.96759e+07	4.30727e+07	3.83524e+07	3.8961e+07
Tb11.v5.0493.1-p1	kinesin K39, putative	3		0.780079	0.0735828	25.8783	26.2753	26.0373	25.8847	25.5767	25.6648	6.16814e+07	8.12176e+07	6.88679e+07	6.19546e+07	5.00431e+07	5.31972e+07
Tb11.v5.0507.1-p1	hypothetical protein, conserved	3		0.850189	0.367351	25.5953	26.1317	26.0903	25.5348	25.5925	26.0007	5.06921e+07	7.35251e+07	7.14441e+07	4.86111e+07	5.05949e+07	6.7143e+07
Tb11.v5.0553.1-p1	ubiquitin hydrolase, putative	11		1.07795	0.404751	26.9412	27.0242	26.8432	27.2341	26.9212	26.9635	1.28859e+08	1.36492e+08	1.20396e+08	1.57865e+08	1.27087e+08	1.30863e+08
Tb11.v5.0564.1-p1	protein kinase, putative	9		0.94395	0.377193	27.2678	27.397	27.4286	27.3534	27.1396	27.3456	1.61596e+08	1.7673e+08	1.80648e+08	1.71474e+08	1.47857e+08	1.70553e+08
Tb11.v5.0596.1-p1	serine/threonine protein kinase, putative	13		0.884518	0.0515796	28.4408	28.5876	28.6218	28.3995	28.4124	28.3115	3.64361e+08	4.03398e+08	4.13078e+08	3.54084e+08	3.57264e+08	3.33122e+08
Tb11.v5.0624.1-p1	retrotransposon hot spot protein (PHS), putative	17		0.934357	0.341295	30.7197	30.953	30.9484	30.7888	30.6993	30.8474	1.76833e+09	2.07869e+09	2.07203e+09	1.85509e+09	1.74344e+09	1.93197e+09
Tb11.v5.0647.1-p1	hypothetical protein, conserved	4		1.15127	0.506553	23.72	23.9699	24.0845	23.7165	24.1158	24.4763	1.38179e+07	1.64305e+07	1.77886e+07	1.3784e+07	1.81797e+07	2.33398e+07
Tb11.v5.0663.1-p1	hypothetical protein, conserved	3		0.817543	0.0666663	21.6931	21.8859	21.5681	21.3744	21.3448	21.5639	3.39048e+06	3.87537e+06	3.10921e+06	2.7186e+06	2.66331e+06	3.10016e+06
Tb11.v5.0692.1-p1	Thiopurine S-methyltransferase (TPMT), putative	3		0.813622	0.270413	24.6844	24.7609	24.6072	24.8669	24.145	23.9944	2.69612e+07	2.8429e+07	2.55568e+07	3.0597e+07	1.85509e+07	1.67124e+07
Tb11.v5.0713.1-p1	Retrotransposon hot spot protein 6 (RHS6), putative	26		0.879232	0.135151	32.6344	32.87	32.8357	32.6772	32.4636	32.6443	6.66703e+09	7.84978e+09	7.66555e+09	6.86772e+09	5.92267e+09	6.71305e+09
Tb11.v5.0742.1-p1	proteasome beta-1 subunit, putative	4		0.91057	0.368125	27.831	28.1607	28.0826	27.7781	27.8337	28.0614	2.38767e+08	3.00074e+08	2.84244e+08	2.3016e+08	2.3921e+08	2.80106e+08
Tb11.v5.0745.1-p1	hypothetical protein, conserved	3		1.05282	0.645084	25.0201	25.5376	25.5722	25.5819	25.4003	25.4271	3.40257e+07	4.87067e+07	4.98876e+07	5.02261e+07	4.42859e+07	4.51135e+07
Tb11.v5.0765.1-p1	N-acetylglucosaminyl-phosphatidylinositol biosynthetic protein, putative	3		1.04409	0.394109	23.1152	23.2491	23.2307	23.1628	23.2942	23.3234	9.08608e+06	9.96971e+06	9.84321e+06	9.39079e+06	1.02862e+07	1.04962e+07
Tb11.v5.0775.1-p1	methyltransferase domain containing protein, putative	3		0.956547	0.52324	25.9712	26.2017	26.15	26.1271	25.9352	26.0716	6.57819e+07	7.71798e+07	7.44624e+07	7.32904e+07	6.41627e+07	7.05234e+07
Tb11.v5.0831.1-p1	kinesin motor domain containing protein, putative	4		1.21768	0.0868747	23.2868	23.5297	23.6737	23.7078	23.7452	23.9079	1.02339e+07	1.21102e+07	1.33811e+07	1.37008e+07	1.40607e+07	1.57401e+07
Tb11.v5.0836.1-p1	metal-ion transporter, putative	2		0.638165	0.111582	23.4748	24.0002	23.929	22.5455	23.2672	23.5312	1.16576e+07	1.67796e+07	1.59715e+07	6.12185e+06	1.00953e+07	1.21229e+07
Tb11.v5.0965.1-p1	ATP-dependent DEAH-box RNA helicase, putative	7		1.1493	0.0896068	25.635	25.6679	25.8083	25.9127	26.0221	25.774	5.21092e+07	5.33081e+07	5.87586e+07	6.31663e+07	6.81437e+07	5.73771e+07
Tb11.v5.0996.1-p1	hypothetical protein, conserved	18		0.922601	0.335458	30.0127	30.2951	30.2758	30.1468	29.9909	30.1096	1.08327e+09	1.31747e+09	1.2999e+09	1.18876e+09	1.06697e+09	1.15848e+09
Tb11.v5.1011.1-p1	calpain-like cysteine peptidase, putative	8		1.49161	0.144167	26.3174	25.5497	25.4576	26.7558	26.2594	26.1229	8.36205e+07	4.91168e+07	4.60773e+07	1.13317e+08	8.0329e+07	7.30748e+07
Tb927.1.1000	developmentally regulated phosphoprotein	10		1.17694	0.0894176	27.3863	27.6712	27.5403	27.9019	27.6897	27.716	1.75429e+08	2.13725e+08	1.95193e+08	2.50786e+08	2.16483e+08	2.20474e+08
Tb927.1.1010	E3 ubiquitin-protein ligase KCMF1, putative	3		1.13076	0.351101	24.2919	24.7669	24.6294	24.7398	24.5731	24.926	2.05401e+07	2.85478e+07	2.59524e+07	2.80171e+07	2.49594e+07	3.18758e+07
Tb927.1.1030	Nucleolar protein 49	5		1.11371	0.267617	25.1602	24.9907	24.894	25.3469	25.0493	25.1101	3.74939e+07	3.3338e+07	3.11783e+07	4.2674e+07	3.47215e+07	3.62144e+07
Tb927.1.1050	Metallo-dependent phosphatase-like domain-containing protein	6		0.821932	0.164111	25.0664	25.37	25.3643	25.0173	24.7233	25.1933	3.5134e+07	4.33641e+07	4.31931e+07	3.39585e+07	2.76991e+07	3.83642e+07
Tb927.1.1060	Cell cycle checkpoint protein RAD1-like, putative	4		0.930301	0.245029	25.9153	26.1521	26.0277	25.9896	25.9044	25.8962	6.32811e+07	7.45716e+07	6.8409e+07	6.66273e+07	6.28069e+07	6.24511e+07
Tb927.1.1120	ribosomal RNA-processing protein 8, putative	3		0.8389	0.132163	25.506	25.9026	25.6469	25.3804	25.3773	25.5583	4.76494e+07	6.27287e+07	5.25394e+07	4.36764e+07	4.35843e+07	4.94109e+07
Tb927.1.1130	glycerol-3-phosphate dehydrogenase (FAD-dependent), putative	5		1.05795	0.490712	25.9299	26.0652	26.2464	26.2234	26.0386	26.2326	6.39248e+07	7.02137e+07	7.96062e+07	7.835e+07	6.89292e+07	7.8852e+07
Tb927.1.1140	Transmembrane protein 231, putative	3		0.898955	0.27809	25.1752	25.5288	25.3888	25.0999	25.2507	25.2958	3.78871e+07	4.84115e+07	4.39329e+07	3.59591e+07	3.99224e+07	4.11909e+07
Tb927.1.1150	zeta tubulin	2		1.2674	0.142334	21.8277	21.8438	21.2988	22.0348	22.1455	21.8656	3.72207e+06	3.76382e+06	2.57979e+06	4.29668e+06	4.63929e+06	3.82131e+06
Tb927.1.1160	kinetoplast ribosomal PPR-repeat containing protein 3	2		0.836915	0.112953	23.9203	24.0981	24.2706	23.8765	23.7014	23.9506	1.5875e+07	1.79579e+07	2.02386e+07	1.54003e+07	1.36409e+07	1.6212e+07
Tb927.1.1170	DNA-directed RNA polymerase 2, RPB12 subunit	2		1.05733	0.574519	23.8542	23.8916	23.6407	24.0013	23.9435	23.675	1.51646e+07	1.55631e+07	1.30786e+07	1.67919e+07	1.61324e+07	1.33933e+07
Tb927.1.1200	Mitochondrial ribosomal protein S15	6		1.07242	0.404493	26.0874	26.4319	26.3731	26.4755	26.3242	26.4142	7.12976e+07	9.05328e+07	8.69125e+07	9.33093e+07	8.40199e+07	8.94266e+07
Tb927.1.1220	RWD domain-containing protein	4		1.02702	0.562143	25.8334	26.0289	25.9468	25.9916	25.9209	26.0169	5.97889e+07	6.84669e+07	6.46783e+07	6.67182e+07	6.35297e+07	6.78989e+07
Tb927.1.1240	cytidine triphosphate synthase, putative	18		1.17796	0.17461	29.7893	29.8854	29.8444	30.3261	29.8923	29.9733	9.27844e+08	9.91732e+08	9.63937e+08	1.34606e+09	9.96527e+08	1.05408e+09
Tb927.1.1330	Mitochondrial Editosome-like Complex TUTase	3		1.14015	0.272983	26.0447	26.0772	26.0741	26.5019	26.0317	26.1901	6.92183e+07	7.07985e+07	7.0645e+07	9.50288e+07	6.85983e+07	7.65592e+07
Tb927.1.1340	Quinonprotein alcohol dehydrogenase-like protein, putative	2		0.853716	0.745196	21.5269	22.8761	22.0646	21.4786	22.2163	22.2825	3.02174e+06	7.69824e+06	4.38647e+06	2.92208e+06	4.87286e+06	5.10167e+06
Tb927.1.1370	rRNA biogenesis protein, putative	11		1.11354	0.145182	27.4529	27.5519	27.4639	27.7741	27.5044	27.6452	1.83711e+08	1.9677e+08	1.85124e+08	2.29525e+08	1.90388e+08	2.0991e+08
Tb927.1.1380	serine/threonine protein phosphatase 2A regulatory subunit, putative	15		1.20386	0.0828687	28.4128	28.4452	28.4034	28.9029	28.5606	28.5747	3.57367e+08	3.65476e+08	3.5504e+08	5.01916e+08	3.95902e+08	3.99806e+08
Tb927.1.1390	hypothetical protein, conserved	3		0.808889	0.12962	24.7639	24.2657	24.6022	24.2222	24.1895	24.3414	2.8489e+07	2.01706e+07	2.54676e+07	1.9571e+07	1.91327e+07	2.12569e+07
Tb927.1.1420	conserved protein, unknown function	6		1.02085	0.82692	25.4469	25.678	25.8092	25.8499	25.6111	25.5693	4.57378e+07	5.36849e+07	5.87962e+07	6.0479e+07	5.12513e+07	4.97866e+07
Tb927.1.1530	STE group serine/threonine-protein kinase, putative	3		1.19895	0.225643	23.0697	23.6441	23.5292	23.5318	23.8081	23.736	8.80378e+06	1.31091e+07	1.21055e+07	1.21276e+07	1.46873e+07	1.39714e+07
Tb927.1.1550	tubulin-tyrosine ligase, putative	5		0.851332	0.363322	24.9949	25.4138	25.4978	24.7316	25.2165	25.2539	3.34354e+07	4.46994e+07	4.73816e+07	2.78579e+07	3.89882e+07	4.001e+07
Tb927.1.1560	vesicular-fusion protein nsf, putative	17		0.957975	0.420331	28.6252	28.719	28.7463	28.7466	28.5393	28.6139	4.14035e+08	4.41864e+08	4.50308e+08	4.50393e+08	3.90112e+08	4.10808e+08
Tb927.1.1580	electron transport protein SCO1/2, putative	7		0.944132	0.610638	27.5584	27.5401	27.5705	27.8387	27.3339	27.1589	1.97658e+08	1.95164e+08	1.9932e+08	2.40047e+08	1.69169e+08	1.49844e+08
Tb927.1.1610	hypothetical protein, conserved	2		0.91153	0.5696	23.2917	22.7025	22.9715	23.0456	22.8134	22.7491	1.02686e+07	6.82549e+06	8.22448e+06	8.65794e+06	7.37109e+06	7.04957e+06
Tb927.1.1620	ATP-dependent DEAD/H RNA helicase, putative	14		0.876334	0.116014	27.1723	27.1976	27.1264	27.0296	26.7811	27.0963	1.5124e+08	1.53918e+08	1.46506e+08	1.37002e+08	1.1532e+08	1.43487e+08
Tb927.1.1690	RNA-editing nuclease 1	7		0.885558	0.140928	25.293	25.6022	25.4826	25.2433	25.3116	25.3123	4.11091e+07	5.0935e+07	4.68829e+07	3.97196e+07	4.1645e+07	4.16633e+07
Tb927.1.1700	AATF protein, putative	9		0.89102	0.25328	25.8821	26.2085	26.2236	25.964	25.8627	26.0093	6.18425e+07	7.75451e+07	7.83577e+07	6.54571e+07	6.10148e+07	6.75435e+07
Tb927.1.1710	transmembrane protein, conserved	21		1.00227	0.982167	27.6979	27.7171	27.9661	27.9717	27.6807	27.7375	2.17715e+08	2.20643e+08	2.62199e+08	2.63226e+08	2.15138e+08	2.23783e+08
Tb927.1.1720	cyclophilin 15, putative	8		0.967353	0.62675	26.5997	26.8186	26.8363	26.6807	26.6554	26.7835	1.01696e+08	1.18356e+08	1.19824e+08	1.07566e+08	1.05696e+08	1.15517e+08
Tb927.1.1730	Polyadenylation mediator complex protein PAMC1, putative	12		1.12199	0.246998	27.5208	27.8302	27.6425	27.9935	27.7123	27.788	1.92574e+08	2.38624e+08	2.09519e+08	2.67229e+08	2.19898e+08	2.31752e+08
Tb927.1.180	retrotransposon hot spot protein 1 (RHS1), putative	31		0.938839	0.309485	31.2451	31.3991	31.4634	31.3443	31.2029	31.2924	2.5451e+09	2.83195e+09	2.96099e+09	2.72625e+09	2.47178e+09	2.63004e+09
Tb927.1.1910	MORN repeat-containing protein	2		0.654713	0.30126	22.5542	22.4028	23.4755	21.3508	22.8719	22.2386	6.15886e+06	5.54523e+06	1.16633e+07	2.67449e+06	7.6759e+06	4.94851e+06
Tb927.1.1960	chaperone protein DnaJ, putative	10		0.932613	0.427224	28.8223	28.7812	28.8278	28.95	28.5651	28.5809	4.74649e+08	4.6132e+08	4.76456e+08	5.18574e+08	3.97141e+08	4.0153e+08
Tb927.1.2110	Calpain-like protein 1.2	7		1.2117	0.0534676	26.0205	26.0319	25.9291	26.4492	26.1341	26.2126	6.80705e+07	6.86071e+07	6.38925e+07	9.16217e+07	7.36473e+07	7.77619e+07
Tb927.1.2120	Calpain-like protein CALP1.3	8		1.06265	0.623088	26.7609	27.1557	27.0122	27.2683	26.8637	27.0586	1.13716e+08	1.4951e+08	1.35361e+08	1.61655e+08	1.2212e+08	1.39783e+08
Tb927.1.2190	Raptor N-terminal CASPase like domain containing protein, putative	2		0.852635	0.255389	25.6037	26.0103	25.989	25.4486	25.6532	25.8222	5.09908e+07	6.75878e+07	6.65986e+07	4.57908e+07	5.27711e+07	5.93266e+07
Tb927.1.220	retrotransposon hot spot protein 1 (RHS1), putative	32		0.940004	0.371794	31.4725	31.666	31.7176	31.5975	31.4497	31.5486	2.97968e+09	3.40735e+09	3.53132e+09	3.24934e+09	2.93287e+09	3.14108e+09
Tb927.1.2210	nucleosome assembly protein (NAP), putative	4		0.505452	0.0514421	25.5573	26.6096	26.3694	25.031	25.3908	25.3327	4.93761e+07	1.02399e+08	8.66932e+07	3.42824e+07	4.39938e+07	4.22584e+07
Tb927.1.2330	beta tubulin	22		0.96492	0.61715	38.1205	38.2759	38.25	38.3343	38.027	38.1179	2.9882e+11	3.32818e+11	3.26884e+11	3.4655e+11	2.80061e+11	2.98287e+11
Tb927.1.2340	alpha tubulin	25		0.967442	0.673748	38.0273	38.2719	38.1889	38.2509	37.9754	38.116	2.80132e+11	3.31889e+11	3.13326e+11	3.27092e+11	2.70227e+11	2.979e+11
Tb927.1.240	retrotransposon hot spot protein (RHS, pseudogene), putative	20		0.986644	0.896884	29.9549	30.2104	30.27	30.2335	29.9858	30.1656	1.04068e+09	1.24231e+09	1.29471e+09	1.26236e+09	1.06325e+09	1.2043e+09
Tb927.1.2430	histone H3, putative	5		0.796447	0.053454	32.0625	32.3611	32.2995	32.0415	31.7691	31.9314	4.48514e+09	5.51642e+09	5.28601e+09	4.42044e+09	3.65974e+09	4.09557e+09
Tb927.1.2570	coatomer beta subunit	25		0.841615	0.0551412	29.4482	29.4109	29.5038	29.3819	29.109	29.1098	7.32455e+08	7.13801e+08	7.61263e+08	6.99565e+08	5.79003e+08	5.79313e+08
Tb927.1.2600	pumilio/PUF RNA binding protein 9	4		0.863599	0.228108	24.1317	24.0602	24.0004	24.0991	23.8497	23.5621	1.83811e+07	1.74925e+07	1.67817e+07	1.79704e+07	1.51177e+07	1.2385e+07
Tb927.1.2670	paralyzed flagella 16	11		0.868666	0.250513	28.6543	28.8768	28.8239	28.8543	28.3748	28.4807	4.22474e+08	4.92931e+08	4.75176e+08	4.853e+08	3.48064e+08	3.74588e+08
Tb927.1.2730	conserved protein, unknown function	4		0.940246	0.519002	25.0909	25.4115	25.3953	25.2726	25.1028	25.2712	3.57368e+07	4.46302e+07	4.41308e+07	4.05333e+07	3.60314e+07	4.04938e+07
Tb927.1.2770	hypothetical protein, conserved	2		1.01094	0.906263	24.4228	24.7299	25.1536	24.9627	24.5056	24.9352	2.24898e+07	2.78261e+07	3.73227e+07	3.26987e+07	2.38184e+07	3.20798e+07
Tb927.1.2980	hypothetical protein, conserved	3		1.34588	0.100773	27.4053	27.0379	27.3071	27.9928	27.529	27.4817	1.7775e+08	1.37795e+08	1.66058e+08	2.67092e+08	1.93665e+08	1.87421e+08
Tb927.1.2990	kinetoplast ribosomal PPR-repeat containing protein 2	8		1.09763	0.400441	26.8623	27.0655	27.0336	27.3236	26.909	27.1103	1.22002e+08	1.40451e+08	1.37382e+08	1.67969e+08	1.26016e+08	1.44886e+08
Tb927.1.3000	amidohydrolase, putative	6		0.982633	0.531323	27.227	27.3275	27.2902	27.284	27.2135	27.2722	1.57084e+08	1.68416e+08	1.64122e+08	1.63413e+08	1.55622e+08	1.62083e+08
Tb927.1.3030	KREL2	7		1.25671	0.0865466	26.3128	26.2867	26.1336	26.8203	26.474	26.3982	8.33569e+07	8.18628e+07	7.3619e+07	1.18497e+08	9.32134e+07	8.84412e+07
Tb927.1.3050	tRNA (Uracil-5-)-methyltransferase, putative	8		0.91802	0.153406	26.5905	26.6421	26.5735	26.5907	26.3527	26.4836	1.01047e+08	1.04731e+08	9.98647e+07	1.01062e+08	8.5692e+07	9.38327e+07
Tb927.1.3110	soluble N-ethylmaleimide sensitive factor (NSF) attachment protein, putative	6		1.13314	0.116292	27.2486	27.211	27.1816	27.56	27.2946	27.3128	1.59457e+08	1.55354e+08	1.5222e+08	1.97873e+08	1.6462e+08	1.66719e+08
Tb927.1.3120	Peptidase C50 separase, putative	3		0.737808	0.258613	24.1775	25.0747	24.9533	24.3302	24.1594	24.5291	1.89734e+07	3.53382e+07	3.24862e+07	2.10928e+07	1.87369e+07	2.42104e+07
Tb927.1.3150	hypothetical protein, conserved	2		1.08116	0.551481	23.8486	24.3985	24.128	24.3353	24.0429	24.3653	1.51063e+07	2.2114e+07	1.83337e+07	2.11672e+07	1.72839e+07	2.16115e+07
Tb927.1.3170	CHORD, putative	9		0.956952	0.555338	26.983	27.2532	27.1433	26.9578	27.1289	27.1092	1.32645e+08	1.59968e+08	1.48235e+08	1.30344e+08	1.46759e+08	1.44768e+08
Tb927.1.320	retrotransposon hot spot protein (RHS, pseudogene), putative	2		0.909039	0.348746	25.0993	25.4656	25.2621	25.0764	25.075	25.2767	3.59447e+07	4.6334e+07	4.02392e+07	3.53788e+07	3.53456e+07	4.0649e+07
Tb927.1.3200	Suppressor of G2 allele of SKP1, putative	6		1.20264	0.0644236	27.9142	28.2631	28.061	28.4237	28.3048	28.327	2.52943e+08	3.22141e+08	2.8002e+08	3.60067e+08	3.31584e+08	3.3673e+08
Tb927.1.3230	cell division cycle protein, putative	4		1.41052	0.143849	23.0914	22.8648	22.9149	23.8783	23.3071	23.0585	8.93703e+06	7.63829e+06	7.90798e+06	1.54202e+07	1.03784e+07	8.73558e+06
Tb927.1.3260	hypothetical protein, conserved	17		0.946798	0.422787	27.5015	27.6204	27.6361	27.646	27.3624	27.5028	1.90015e+08	2.06328e+08	2.08592e+08	2.10026e+08	1.72543e+08	1.90183e+08
Tb927.1.3270	hypothetical protein, conserved	7		1.10893	0.17623	27.0904	27.3834	27.2679	27.3967	27.3363	27.4682	1.42895e+08	1.75073e+08	1.6161e+08	1.76695e+08	1.6945e+08	1.85674e+08
Tb927.1.3290	hypothetical protein, conserved	4		0.946009	0.380109	24.1411	24.1918	24.3802	24.1392	24.1262	24.217	1.85012e+07	1.91634e+07	2.18352e+07	1.8477e+07	1.83103e+07	1.95e+07
Tb927.1.3310	hypothetical protein, conserved	15		1.04298	0.38363	30.2653	30.1974	30.2423	30.4026	30.2118	30.2668	1.29054e+09	1.2312e+09	1.27006e+09	1.41932e+09	1.24354e+09	1.2919e+09
Tb927.1.3410.1	hypothetical protein, conserved	6		0.658925	0.0542787	25.6016	26.1125	26.0645	25.5149	25.0275	25.4378	5.0916e+07	7.25523e+07	7.01753e+07	4.79474e+07	3.41996e+07	4.54496e+07
Tb927.1.3800	Present in the outer mitochondrial membrane proteome 18	2		0.649355	0.0502226	24.7965	24.8947	24.2862	24.0694	23.8489	24.2352	2.91391e+07	3.11923e+07	2.04581e+07	1.76043e+07	1.51088e+07	1.9748e+07
Tb927.1.3830	glucose-6-phosphate isomerase, glycosomal	14		1.06985	0.323753	29.6098	29.822	29.77	29.914	29.7172	29.8641	8.19293e+08	9.49082e+08	9.15526e+08	1.01159e+09	8.82585e+08	9.77184e+08
Tb927.1.3880	Fusaric acid resistance protein-like, putative	8		1.24063	0.111919	24.8254	25.0383	24.9605	25.4839	25.019	25.2248	2.97298e+07	3.44574e+07	3.26485e+07	4.69256e+07	3.39988e+07	3.92128e+07
Tb927.1.3910	Anaphase-promoting complex subunit CDC23	4		1.19256	0.067772	25.6478	25.7909	25.7647	26.1377	25.825	25.99	5.2574e+07	5.80555e+07	5.70094e+07	7.38315e+07	5.94429e+07	6.66449e+07
Tb927.1.4010	primase 2	5		0.944638	0.676437	23.9485	24.0875	24.0107	23.1672	24.1821	24.2277	1.61891e+07	1.78257e+07	1.6902e+07	9.4193e+06	1.90338e+07	1.9645e+07
Tb927.1.4050	ser/thr protein phosphatase, putative	16		1.14267	0.244493	28.4521	28.5027	28.5375	28.9041	28.4521	28.6794	3.67231e+08	3.80337e+08	3.89631e+08	5.02335e+08	3.6722e+08	4.29892e+08
Tb927.1.4100	cytochrome oxidase subunit IV	9		0.94528	0.31932	30.3885	30.5428	30.5013	30.3064	30.3836	30.4971	1.40561e+09	1.56422e+09	1.51984e+09	1.3278e+09	1.40075e+09	1.51544e+09
Tb927.1.4180	leucine-rich repeat protein (LRRP), putative	9		1.30047	0.289039	26.0074	25.9713	25.8506	26.8025	26.0311	25.9835	6.74526e+07	6.57856e+07	6.05057e+07	1.17043e+08	6.85698e+07	6.63458e+07
Tb927.1.4220.1	Ydr279p protein family (RNase H2 complex component), putative	5		0.933	0.529746	26.7599	26.9131	26.4785	26.6598	26.5716	26.6515	1.13638e+08	1.26372e+08	9.35054e+07	1.06025e+08	9.97329e+07	1.05413e+08
Tb927.1.4230	hypothetical protein, conserved	4		1.05627	0.503856	24.6912	24.8645	24.8272	25.0179	24.8794	24.7121	2.7089e+07	3.05468e+07	2.97667e+07	3.39729e+07	3.08631e+07	2.74846e+07
Tb927.1.4310	Flagellum attachment zone protein 2	43		0.862565	0.104361	30.516	30.7313	30.6646	30.58	30.3143	30.3724	1.53546e+09	1.78259e+09	1.70197e+09	1.60503e+09	1.33508e+09	1.38998e+09
Tb927.1.4340	hypothetical protein, conserved	2		1.08623	0.356764	24.4837	24.4285	24.4263	24.7676	24.4308	24.4752	2.34599e+07	2.25798e+07	2.25442e+07	2.85614e+07	2.26151e+07	2.33214e+07
Tb927.1.4420	ABC transporter, putative	15		0.979753	0.733143	28.4799	28.5695	28.541	28.6693	28.3575	28.4587	3.74374e+08	3.98349e+08	3.90572e+08	4.2689e+08	3.43931e+08	3.68921e+08
Tb927.1.4450	calcium-activated potassium channel, putative	3		0.774739	0.339458	21.8254	22.231	22.2996	20.9231	21.849	22.2321	3.71615e+06	4.92254e+06	5.16235e+06	1.98824e+06	3.77748e+06	4.92649e+06
Tb927.1.4480	WD repeat and HMG-box DNA-binding protein, putative	7		3.18038	0.442375	27.6066	25.4084	25.9653	29.5468	27.3172	25.5301	2.04365e+08	4.45337e+07	6.55141e+07	7.8427e+08	1.67226e+08	4.84548e+07
Tb927.1.4490	acetyltransferase, putative	5		1.12857	0.187918	28.1899	28.4241	28.4332	28.6717	28.4186	28.481	3.06191e+08	3.60171e+08	3.62442e+08	4.27614e+08	3.5881e+08	3.74651e+08
Tb927.1.450	retrotransposon hot spot protein (RHS, pseudogene), putative	20		0.917011	0.147761	30.7655	30.9263	30.8952	30.7191	30.6622	30.8307	1.82534e+09	2.04052e+09	1.99706e+09	1.7675e+09	1.69919e+09	1.90967e+09
Tb927.1.4500	SNARE associated Golgi protein, putative	3		1.19264	0.412006	26.5883	25.9827	26.1616	26.8798	26.401	26.1954	1.00899e+08	6.63108e+07	7.50616e+07	1.2349e+08	8.86125e+07	7.68398e+07
Tb927.1.4690	Protein arginine N-methyltransferase 1 catalytic subunit	8		1.06703	0.692408	29.3309	29.0544	29.0096	29.5393	29.0702	29.0303	6.75262e+08	5.5751e+08	5.40451e+08	7.80192e+08	5.63624e+08	5.48264e+08
Tb927.1.4760	Vacuolar sorting protein 39 domain 1/Vacuolar sorting protein 39 domain 2, putative	6		0.92493	0.501654	24.1982	24.6009	24.589	24.2838	24.4178	24.3806	1.92475e+07	2.54456e+07	2.5236e+07	2.04252e+07	2.24123e+07	2.1842e+07
Tb927.1.4780	Alpha/beta hydrolase domain-containing protein	2		0.981147	0.877769	25.4723	25.8618	25.7376	25.8093	25.5239	25.6691	4.65517e+07	6.09787e+07	5.59502e+07	5.88003e+07	4.82443e+07	5.3354e+07
Tb927.1.4830	phospholipase A1	5		1.21587	0.136714	28.225	28.3538	28.2897	28.8381	28.4287	28.4086	3.13739e+08	3.43036e+08	3.28129e+08	4.79866e+08	3.61323e+08	3.56331e+08
Tb927.1.5000	hypothetical protein, conserved	6		0.893245	0.330953	26.0957	26.4789	26.0724	26.002	26.1318	26.0587	7.17124e+07	9.35256e+07	7.05629e+07	6.72012e+07	7.35299e+07	6.98968e+07
Tb927.1.5030	leucine-rich repeat protein (LRRP), putative	8		1.01593	0.971269	25.8379	26.2649	26.145	26.4536	25.9955	25.8247	5.99749e+07	8.06343e+07	7.42026e+07	9.1905e+07	6.68995e+07	5.94284e+07
Tb927.1.530.2	hypothetical protein, conserved	2		0.815069	0.0722037	23.6001	23.6166	23.7702	23.556	23.1686	23.3576	1.27158e+07	1.28618e+07	1.4307e+07	1.23324e+07	9.42823e+06	1.07481e+07
Tb927.1.540	DNA-directed RNA polymerase III, putative	14		1.00177	0.991553	26.6017	26.735	26.8085	26.7227	26.5817	26.8442	1.0184e+08	1.11698e+08	1.17537e+08	1.1075e+08	1.00433e+08	1.20477e+08
Tb927.1.630	histone chaperone ASF1A	2		0.783026	0.0512511	26.668	26.5273	26.7936	26.5103	26.2423	26.167	1.06627e+08	9.6719e+07	1.16327e+08	9.5587e+07	7.93824e+07	7.53433e+07
Tb927.1.690	hypothetical protein, conserved	2		1.16326	0.654798	23.2144	22.4051	22.2121	23.4568	22.4774	22.5362	9.73297e+06	5.55415e+06	4.85859e+06	1.1513e+07	5.83956e+06	6.08219e+06
Tb927.1.700	phosphoglycerate kinase	18		0.956993	0.544116	32.281	32.4597	32.4532	32.4658	32.1901	32.3417	5.21866e+09	5.90683e+09	5.87994e+09	5.93163e+09	4.89981e+09	5.44263e+09
Tb927.1.710	phosphoglycerate kinase	19		0.951077	0.495982	32.6997	32.9206	32.8949	32.8687	32.6415	32.7887	6.97588e+09	8.12974e+09	7.98627e+09	7.84267e+09	6.70013e+09	7.41937e+09
Tb927.1.720	phosphoglycerate kinase	20		1.06545	0.504577	31.0627	30.9496	31.058	31.3236	31.018	30.9807	2.24283e+09	2.07371e+09	2.2355e+09	2.68754e+09	2.17442e+09	2.1189e+09
Tb927.1.730	NADH-ubiquinone oxidoreductase complex I subunit, putative	2		0.547568	0.107426	23.6204	23.5053	23.6112	21.6163	22.7947	23.2689	1.28962e+07	1.19073e+07	1.2814e+07	3.21485e+06	7.27598e+06	1.01073e+07
Tb927.1.740	phosphatidylinositol-4-phosphate 5-kinase related	6		0.952401	0.737941	26.5388	26.9362	27.0282	26.747	26.7007	26.8835	9.74952e+07	1.28413e+08	1.36862e+08	1.12628e+08	1.09073e+08	1.23802e+08
Tb927.1.750	Metal-binding domain-containing protein	10		1.18098	0.14563	26.7132	26.5713	26.6399	27.0555	26.6428	26.9193	1.10023e+08	9.97115e+07	1.04568e+08	1.39485e+08	1.04784e+08	1.26915e+08
Tb927.1.780	leucine-rich repeat-containing protein	3		0.897996	0.556462	23.0138	23.5208	22.9426	23.2735	22.9204	22.8528	8.46939e+06	1.20358e+07	8.0613e+06	1.01394e+07	7.93806e+06	7.57512e+06
Tb927.1.860	transmembrane protein, putative	6		0.813066	0.0579142	26.9665	27.2161	27.3017	26.9081	26.7731	26.9235	1.3114e+08	1.55909e+08	1.65439e+08	1.25931e+08	1.14689e+08	1.27283e+08
Tb927.1.870	deoxyhypusine synthase	5		1.05146	0.711738	25.7627	25.8244	25.6281	26.0701	25.5944	25.7325	5.69317e+07	5.9418e+07	5.18583e+07	7.04508e+07	5.06613e+07	5.57524e+07
Tb927.1.880	Midasin, putative	51		1.09488	0.150846	28.8578	28.904	28.9039	29.146	28.9049	28.9975	4.86492e+08	5.02313e+08	5.02291e+08	5.94041e+08	5.02606e+08	5.35923e+08
Tb927.1.990	Enkuring domain-containig protein	6		1.09183	0.268807	27.2648	27.6017	27.478	27.6249	27.5189	27.5987	1.61257e+08	2.03676e+08	1.86939e+08	2.06972e+08	1.92322e+08	2.03256e+08
Tb927.10.10010	mRNA turnover protein 4 homolog, putative	9		0.986087	0.838185	29.6157	29.8061	29.807	29.8089	29.5772	29.7794	8.22644e+08	9.38701e+08	9.39265e+08	9.40509e+08	8.01009e+08	9.2152e+08
Tb927.10.10020	Rab5 GDP/GTP exchange factor (Rabex-5), putative	3		0.995925	0.80367	24.4029	24.3997	24.379	24.3504	24.3857	24.4268	2.21822e+07	2.21326e+07	2.18181e+07	2.13902e+07	2.19199e+07	2.25533e+07
Tb927.10.10090	Component of motile flagella 14	3		1.05023	0.749881	25.2884	24.93	25.2905	25.5272	25.1185	25.0578	4.09783e+07	3.19642e+07	4.10393e+07	4.83555e+07	3.64262e+07	3.49261e+07
Tb927.10.10100	hypothetical protein, conserved	4		1.36101	0.0746665	26.5028	26.5043	26.4492	27.2562	26.694	26.7746	9.50881e+07	9.51888e+07	9.16238e+07	1.60304e+08	1.08565e+08	1.14802e+08
Tb927.10.10120	hypothetical protein, conserved	4		1.24178	0.0959686	23.0031	23.1095	22.6544	23.1887	23.1872	23.3596	8.40644e+06	9.05009e+06	6.60172e+06	9.56057e+06	9.5509e+06	1.07635e+07
Tb927.10.10130	RNA editing mediator complex protein 1	9		1.09257	0.375362	26.0363	25.9463	25.8699	26.2934	25.9554	25.9654	6.88173e+07	6.4658e+07	6.13208e+07	8.22433e+07	6.5068e+07	6.55178e+07
Tb927.10.10280	Microtubule-associated repetitive protein 2	15		0.865954	0.0729163	29.4461	29.7168	29.6629	29.4064	29.3797	29.4304	7.31424e+08	8.82366e+08	8.50029e+08	7.11543e+08	6.98531e+08	7.23481e+08
Tb927.10.10300	hypothetical protein, conserved	5		1.45755	0.109215	24.2646	24.065	24.1166	25.1112	24.306	24.5454	2.01548e+07	1.75506e+07	1.81899e+07	3.62437e+07	2.07419e+07	2.44844e+07
Tb927.10.10320	dynein light chain Tctex-type, putative	3		1.1909	0.280192	25.454	25.5901	25.5901	26.1241	25.6721	25.5298	4.59646e+07	5.05106e+07	5.05129e+07	7.31385e+07	5.34645e+07	4.84446e+07
Tb927.10.10340	structural maintenance of chromosome 2, putative	22		1.11839	0.0658101	27.6492	27.8291	27.8143	27.8978	27.8972	27.9868	2.10497e+08	2.38441e+08	2.36015e+08	2.50079e+08	2.49971e+08	2.65998e+08
Tb927.10.10350	STE/STE11 serine/threonine-protein kinase, putative	2		0.943145	0.480279	27.3374	27.2175	27.5424	27.2266	27.2798	27.3535	1.69579e+08	1.56055e+08	1.95468e+08	1.57045e+08	1.62945e+08	1.71485e+08
Tb927.10.10390	trypanothione reductase	15		1.01949	0.780921	30.9136	30.9416	30.9203	31.1056	30.8599	30.8807	2.02271e+09	2.06233e+09	2.03207e+09	2.31061e+09	1.94875e+09	1.97699e+09
Tb927.10.10400	Mitochondrial ribosomal protein S11	5		1.64944	0.160863	25.8221	25.4064	25.3216	26.8108	26.0866	25.6149	5.9324e+07	4.44709e+07	4.19327e+07	1.17724e+08	7.12591e+07	5.13855e+07
Tb927.10.10420	monothiol glutaredoxin, putative	3		0.983294	0.914141	27.3714	27.7328	27.7675	27.7068	27.4924	27.6239	1.73628e+08	2.23051e+08	2.28487e+08	2.19071e+08	1.88822e+08	2.0683e+08
Tb927.10.1060	T-complex protein 1, delta subunit, putative	24		0.968643	0.692974	32.6244	32.8899	32.8519	32.8134	32.6214	32.7996	6.6212e+09	7.95865e+09	7.75182e+09	7.54793e+09	6.60739e+09	7.47609e+09
Tb927.10.10610	protein tyrosine phosphatase, putative	3		1.10415	0.449635	28.4132	28.4375	29.0034	28.8898	28.7076	28.7597	3.57459e+08	3.63533e+08	5.38143e+08	4.97406e+08	4.38366e+08	4.54499e+08
Tb927.10.10620	hypothetical protein, conserved	6		1.15983	0.0828605	25.4878	25.576	25.5467	25.9196	25.649	25.6689	4.70544e+07	5.00189e+07	4.90141e+07	6.34719e+07	5.26173e+07	5.33473e+07
Tb927.10.10650	cytosolic Fe-S cluster assembly factor NAR1, putative	2		0.882922	0.370953	23.066	23.5369	23.1182	23.1717	22.9281	23.1188	8.78135e+06	1.21707e+07	9.10496e+06	9.44851e+06	7.98067e+06	9.10882e+06
Tb927.10.1070	cdc2-related kinase 1	7		1.00787	0.907267	27.9813	28.2932	28.2064	28.2549	28.0424	28.2261	2.64978e+08	3.28939e+08	3.09715e+08	3.20321e+08	2.76444e+08	3.13979e+08
Tb927.10.10700	splicing factor Prp31	4		1.0344	0.829633	26.5454	26.271	26.4254	26.7311	26.3859	26.2392	9.7938e+07	8.09782e+07	9.01262e+07	1.11397e+08	8.7688e+07	7.92114e+07
Tb927.10.10720	Tetraspanin family, putative	3		1.17361	0.0812016	26.206	26.3812	26.2589	26.6729	26.3971	26.4598	7.74092e+07	8.74031e+07	8.02995e+07	1.06992e+08	8.83754e+07	9.22977e+07
Tb927.10.10730	RNA Interference Factor 5	12		0.946207	0.601319	27.3757	27.462	27.4646	27.6865	27.1661	27.1443	1.74139e+08	1.84873e+08	1.85205e+08	2.16008e+08	1.50598e+08	1.48337e+08
Tb927.10.10740	hypothetical protein, conserved	5		1.05738	0.806933	24.5557	24.646	24.4563	24.9607	24.5976	24.2631	2.46601e+07	2.6254e+07	2.30186e+07	3.26526e+07	2.5388e+07	2.01342e+07
Tb927.10.10780	hypothetical protein, conserved	6		0.991453	0.887619	27.3995	27.5839	27.58	27.5655	27.4325	27.5324	1.77036e+08	2.01172e+08	2.00628e+08	1.98623e+08	1.8114e+08	1.94125e+08
Tb927.10.1080	40S ribosomal protein S23, putative	3		1.01783	0.839341	28.6216	29.0367	29.1226	29.0543	28.8101	29.0288	4.13013e+08	5.50714e+08	5.84488e+08	5.5748e+08	4.70651e+08	5.47688e+08
Tb927.10.10800	palmitoyl acyltransferase 2, putative	2		0.996544	0.932658	24.1825	23.9268	24.0256	24.1679	23.7505	24.1738	1.90401e+07	1.59474e+07	1.70777e+07	1.88481e+07	1.41125e+07	1.89247e+07
Tb927.10.10830	RGG-containing protein 2	5		0.941937	0.571118	28.2238	28.6181	28.5366	28.4539	28.3304	28.3618	3.13487e+08	4.1202e+08	3.8938e+08	3.67695e+08	3.37512e+08	3.44947e+08
Tb927.10.10850	Protein argonaute-1	28		0.89438	0.0761859	31.1693	31.2581	31.3017	31.15	30.9701	31.1226	2.41488e+09	2.56827e+09	2.64695e+09	2.38281e+09	2.10341e+09	2.33799e+09
Tb927.10.10870	CMGC family protein kinase, putative	3		1.2007	0.320919	25.2865	25.3007	25.3112	25.9307	25.2393	25.4291	4.09243e+07	4.13292e+07	4.16315e+07	6.39628e+07	3.96081e+07	4.51772e+07
Tb927.10.10880	ATP-binding cassette sub-family F member 1, putative	14		1.10956	0.221495	28.5502	28.5448	28.5876	28.8967	28.5748	28.641	3.93058e+08	3.916e+08	4.03383e+08	4.99771e+08	3.9984e+08	4.18587e+08
Tb927.10.10890	heat shock protein, putative	48		0.940019	0.485822	35.4634	35.7605	35.7357	35.6205	35.4525	35.6304	4.73734e+10	5.82061e+10	5.7216e+10	5.28242e+10	4.70184e+10	5.31883e+10
Tb927.10.10990	predicted WD40 repeat protein	3		1.27474	0.127627	22.089	22.5768	22.5361	22.7496	22.5863	22.9434	4.46123e+06	6.25614e+06	6.08204e+06	7.05194e+06	6.29737e+06	8.06562e+06
Tb927.10.1100	60S ribosomal protein L9, putative	12		0.934634	0.45692	32.7666	32.8044	32.7971	32.9382	32.4952	32.6047	7.30679e+09	7.50077e+09	7.46299e+09	8.22951e+09	6.05398e+09	6.53131e+09
Tb927.10.11000	hypothetical protein, conserved	2		0.673308	0.0627986	23.4174	22.895	22.8479	22.529	22.2781	22.6843	1.12034e+07	7.7998e+06	7.54901e+06	6.05187e+06	5.08605e+06	6.73993e+06
Tb927.10.11020	DNA mismatch repair protein MSH2, putative	15		1.20804	0.12127	27.7112	27.4582	27.5426	28.0661	27.7195	27.7282	2.19737e+08	1.84387e+08	1.95495e+08	2.81027e+08	2.21004e+08	2.22335e+08
Tb927.10.11070	hypothetical protein, conserved	2		0.833997	0.167273	22.8115	22.4859	22.5898	22.6135	22.2229	22.2508	7.36133e+06	5.87387e+06	6.31272e+06	6.41709e+06	4.89514e+06	4.99066e+06
Tb927.10.11080	paraflagellar rod protein	11		1.02305	0.703229	27.849	28.141	28.0542	28.0916	27.995	28.0698	2.41765e+08	2.95985e+08	2.78714e+08	2.86037e+08	2.67508e+08	2.81735e+08
Tb927.10.11100	deoxyribodipyrimidine photo-lyase, putative	7		1.29196	0.322787	27.7578	27.273	27.3003	28.2661	27.7013	27.3846	2.26949e+08	1.62176e+08	1.6528e+08	3.22812e+08	2.18233e+08	1.75225e+08
Tb927.10.11120	hypothetical protein, conserved	2		0.836251	0.119813	24.685	24.9121	24.9496	24.3874	24.7283	24.6494	2.69736e+07	3.15719e+07	3.24017e+07	2.1945e+07	2.77952e+07	2.63147e+07
Tb927.10.11130	SET domain containing protein, putative	3		1.89294	0.0941096	22.4671	21.8619	21.4519	23.3892	22.7929	22.3555	5.79774e+06	3.81139e+06	2.86848e+06	1.09865e+07	7.26676e+06	5.36613e+06
Tb927.10.11140	hypothetical protein, conserved	4		1.00375	0.929121	24.6839	25.0721	24.7607	24.8652	24.7374	24.9521	2.69513e+07	3.52744e+07	2.8425e+07	3.05617e+07	2.79711e+07	3.24578e+07
Tb927.10.11150	hypothetical protein, conserved	3		1.0396	0.67476	25.9565	26.197	26.1591	26.2518	25.9718	26.2509	6.51156e+07	7.69293e+07	7.49332e+07	7.99051e+07	6.58117e+07	7.98539e+07
Tb927.10.11160	NFU2 iron-sulfur cluster scaffold homolog, mitochondrial	3		1.08198	0.55625	22.4862	22.8935	22.5268	22.9497	22.5226	22.7794	5.87537e+06	7.79185e+06	6.0429e+06	8.10144e+06	6.02522e+06	7.19934e+06
Tb927.10.11180	Ubiquitin-like modifier-activating enzyme ATG7, putative	11		1.00047	0.975282	26.5863	26.7787	26.8615	26.8193	26.6401	26.7768	1.00759e+08	1.15135e+08	1.21929e+08	1.1842e+08	1.04586e+08	1.14977e+08
Tb927.10.11210	hypothetical protein, conserved	4		0.799533	0.0527104	26.6268	26.9172	26.981	26.5647	26.4472	26.5657	1.03625e+08	1.26728e+08	1.32462e+08	9.92623e+07	9.14936e+07	9.93261e+07
Tb927.10.11220	procyclic form surface phosphoprotein	6		1.10454	0.375095	29.6606	29.6695	29.5983	30.0339	29.6646	29.6251	8.48628e+08	8.53932e+08	8.12782e+08	1.09928e+09	8.51002e+08	8.28028e+08
Tb927.10.11230	Ras-induced vulval development antagonist, putative	2		1.46321	0.203751	24.4087	23.9187	23.8281	25.0693	24.5602	24.0723	2.22723e+07	1.58579e+07	1.48928e+07	3.52058e+07	2.47383e+07	1.76395e+07
Tb927.10.11250	Coiled-coil domain-containing protein 40 homolog	14		1.26257	0.0989794	26.9252	27.1607	27.1108	27.6605	27.2328	27.2841	1.27433e+08	1.50031e+08	1.44931e+08	2.12154e+08	1.57725e+08	1.63425e+08
Tb927.10.11260	SSU ribosomal protein, mitochondrial, putative	2		1.12675	0.267767	23.1737	23.4857	23.6424	23.5798	23.5789	23.6952	9.46188e+06	1.17459e+07	1.30944e+07	1.25376e+07	1.25303e+07	1.35822e+07
Tb927.10.1130	dynein arm light chain, axonemal, putative	3		1.16667	0.0946761	26.1102	26.4559	26.3491	26.5716	26.5425	26.4885	7.2434e+07	9.20489e+07	8.54825e+07	9.97335e+07	9.77428e+07	9.41508e+07
Tb927.10.11300	paraflagellar rod component, putative	5		0.974123	0.808967	31.6887	32.054	31.9605	31.9478	31.7575	31.9022	3.46148e+09	4.45863e+09	4.17896e+09	4.14227e+09	3.63034e+09	4.01337e+09
Tb927.10.11310	intraflagellar transport protein 57/55	11		0.977426	0.738766	28.1493	28.293	28.2311	28.3365	28.2228	27.9986	2.97694e+08	3.28875e+08	3.15081e+08	3.38954e+08	3.13259e+08	2.6818e+08
Tb927.10.11350	LSU ribosomal protein, mitochondrial, putative	3		1.3366	0.0649337	28.8359	28.9078	29.3367	29.5706	29.3304	29.4775	4.79141e+08	5.03631e+08	6.78012e+08	7.97308e+08	6.7502e+08	7.4748e+08
Tb927.10.11360	protein phosphatase 2A regulatory subunit, putative	3		0.732161	0.230685	22.1566	22.3434	22.2767	20.9729	22.0823	22.1146	4.67533e+06	5.32151e+06	5.08116e+06	2.05806e+06	4.4405e+06	4.54097e+06
Tb927.10.11370	hypothetical protein, conserved	2		0.467517	0.0684822	23.9576	23.9118	23.9147	21.6853	22.9807	23.3563	1.62914e+07	1.57822e+07	1.58144e+07	3.37235e+06	8.27733e+06	1.07388e+07
Tb927.10.11390	60S ribosomal protein L6, putative	14		1.01001	0.932699	33.345	33.1182	33.0581	33.3926	33.0869	33.0783	1.09103e+10	9.32323e+09	8.94323e+09	1.12764e+10	9.12318e+09	9.06913e+09
Tb927.10.1140	epsilon tubulin	5		2.06388	0.260524	26.0073	25.3854	25.2785	27.5553	25.7668	25.8222	6.74475e+07	4.38286e+07	4.06992e+07	1.97236e+08	5.70944e+07	5.93282e+07
Tb927.10.11420	hypothetical protein, conserved	3		1.21692	0.136497	24.0908	24.4746	24.3167	24.7775	24.4237	24.5331	1.78675e+07	2.33125e+07	2.08955e+07	2.8759e+07	2.2504e+07	2.42779e+07
Tb927.10.11450	TFIIF-stimulated CTD phosphatase, putative	4		0.95202	0.451213	24.7943	24.8429	25.0367	24.8911	24.7886	24.7905	2.90961e+07	3.00927e+07	3.44182e+07	3.11157e+07	2.89804e+07	2.90197e+07
Tb927.10.1150	hypothetical protein, conserved	2		1.27964	0.0666757	24.038	24.1757	24.2678	24.7082	24.2864	24.5324	1.72252e+07	1.89497e+07	2.01989e+07	2.74101e+07	2.0462e+07	2.42661e+07
Tb927.10.11510	hypothetical protein, conserved	8		1.00978	0.980254	25.3458	25.3586	25.588	25.7665	25.373	25.1372	4.26422e+07	4.30241e+07	5.04375e+07	5.70788e+07	4.34537e+07	3.69024e+07
Tb927.10.11520	mitochondrial import inner membrane translocase subunit tim13	5		0.901891	0.218305	26.8337	27.0756	27.0287	26.7642	26.7572	26.9706	1.19606e+08	1.41434e+08	1.36914e+08	1.13976e+08	1.13425e+08	1.31509e+08
Tb927.10.11530	hypothetical protein, conserved	2		0.267079	0.15996	24.4765	24.8909	24.6536	17.7777	23.015	23.6199	2.33436e+07	3.11099e+07	2.63923e+07	224708	8.47615e+06	1.28913e+07
Tb927.10.11570	hypothetical protein, conserved	6		1.10015	0.500111	25.978	25.5202	25.7551	26.1479	25.7881	25.7303	6.60953e+07	4.81234e+07	5.66332e+07	7.4356e+07	5.79408e+07	5.56652e+07
Tb927.10.11610	SKP1-like protein	7		0.98779	0.866337	25.3704	25.5423	25.5952	25.6725	25.399	25.3732	4.33755e+07	4.88654e+07	5.06903e+07	5.34805e+07	4.42451e+07	4.34603e+07
Tb927.10.11660	hypothetical protein, conserved	4		1.20283	0.140083	25.3973	25.7229	25.6326	26.0602	25.7175	25.7695	4.41937e+07	5.53819e+07	5.20196e+07	6.9966e+07	5.51761e+07	5.72009e+07
Tb927.10.11670	hypothetical protein, conserved	2		0.876051	0.127424	23.657	23.7334	23.6958	23.6533	23.5306	23.3097	1.32271e+07	1.39461e+07	1.35878e+07	1.31936e+07	1.21176e+07	1.03975e+07
Tb927.10.11690	YEATS family, putative	4		1.15476	0.162979	24.6825	24.8868	24.9428	25.0474	24.8836	25.1994	2.69259e+07	3.10223e+07	3.2249e+07	3.46743e+07	3.09525e+07	3.85289e+07
Tb927.10.1170	intraflagellar transport protein 172	48		1.14556	0.0853865	30.1606	30.3975	30.3198	30.5326	30.387	30.551	1.20019e+09	1.41438e+09	1.34021e+09	1.5532e+09	1.40415e+09	1.57312e+09
Tb927.10.11720	CW-type Zinc Finger, putative	7		1.27936	0.0873512	23.8525	24.2474	24.1454	24.6493	24.3237	24.3436	1.51468e+07	1.99159e+07	1.85565e+07	2.63135e+07	2.09968e+07	2.12882e+07
Tb927.10.11760	pumilio/PUF RNA binding protein 6	24		1.07916	0.371526	30.3802	30.4627	30.4048	30.7112	30.3759	30.4706	1.39755e+09	1.47971e+09	1.42154e+09	1.75789e+09	1.39332e+09	1.48787e+09
Tb927.10.11780	hypothetical protein, conserved	10		1.07351	0.447971	26.4508	26.3177	26.5026	26.7214	26.3926	26.4484	9.17242e+07	8.364e+07	9.50764e+07	1.1065e+08	8.8098e+07	9.15715e+07
Tb927.10.11800	Axonemal inner arm dynein light chain, putative	4		0.873831	0.0839631	25.0269	25.1255	24.8435	24.7981	24.8236	24.8043	3.41849e+07	3.66036e+07	3.01046e+07	2.91717e+07	2.96933e+07	2.92985e+07
Tb927.10.11840	WD domain, G-beta repeat, putative	3		1.19353	0.330033	23.4785	22.9376	23.353	23.8127	23.4616	23.259	1.16874e+07	8.03336e+06	1.07139e+07	1.47349e+07	1.15514e+07	1.00383e+07
Tb927.10.11870	Guide RNA binding complex protein 5	8		1.14374	0.188752	27.8321	28.0226	27.9991	28.3454	28.0224	28.0521	2.38951e+08	2.72665e+08	2.68263e+08	3.41052e+08	2.72629e+08	2.78298e+08
Tb927.10.11890	hypothetical protein, conserved	1		0.570505	0.137291	22.7582	23.2139	23.1522	21.1339	22.6309	22.5452	7.09402e+06	9.72959e+06	9.32214e+06	2.30107e+06	6.49483e+06	6.12038e+06
Tb927.10.11900	MICOS complex subunit MIC20	4		1.0212	0.887856	25.6338	25.4	25.4424	25.7713	25.3846	25.3867	5.20638e+07	4.42746e+07	4.55966e+07	5.72718e+07	4.38046e+07	4.3868e+07
Tb927.10.11930	beta-D-hydroxybutyrate dehydrogenase	9		1.06107	0.315227	29.0814	29.318	29.2523	29.3476	29.2457	29.3233	5.68023e+08	6.6928e+08	6.39486e+08	6.83151e+08	6.36532e+08	6.71721e+08
Tb927.10.11950	hypothetical protein, conserved	2		1.04138	0.5108	23.5702	23.7901	23.8295	23.8281	23.7308	23.8178	1.2455e+07	1.45051e+07	1.49074e+07	1.48925e+07	1.39212e+07	1.47863e+07
Tb927.10.11990	60S ribosome subunit biogenesis protein NIP7, putative	4		0.977576	0.838671	26.5322	26.155	26.4037	26.6255	26.1842	26.1591	9.70513e+07	7.47228e+07	8.87771e+07	1.03529e+08	7.62487e+07	7.49306e+07
Tb927.10.12000	iron-sulfur cluster assembly protein, putative	4		0.871194	0.546163	25.0212	25.6991	25.6517	24.8763	25.4553	25.4628	3.40519e+07	5.44759e+07	5.27142e+07	3.07982e+07	4.60059e+07	4.62452e+07
Tb927.10.12040	mitogen-activated protein kinase 11, putative	13		1.12537	0.191558	28.6392	28.9327	28.9055	29.0274	28.8861	29.0857	4.18074e+08	5.12389e+08	5.02836e+08	5.47176e+08	4.9611e+08	5.69714e+08
Tb927.10.12050	LSU ribosomal protein, mitochondrial, putative	6		1.02112	0.799147	26.479	26.8406	26.8263	26.7573	26.6372	26.8614	9.35344e+07	1.2018e+08	1.18994e+08	1.13438e+08	1.04375e+08	1.21922e+08
Tb927.10.12090	RBP7a	3		0.908249	0.301267	26.2451	26.536	26.4758	26.4286	26.1864	26.2297	7.95357e+07	9.73068e+07	9.33282e+07	9.03251e+07	7.63671e+07	7.86901e+07
Tb927.10.12110	hypothetical protein, conserved	2		0.96533	0.827151	24.9765	24.1332	24.5488	25.1478	24.0752	24.1389	3.30116e+07	1.83998e+07	2.45427e+07	3.71732e+07	1.76751e+07	1.84724e+07
Tb927.10.12120	hypothetical protein, conserved	5		0.885155	0.299144	24.1938	24.428	23.97	24.0748	23.9502	24.0717	1.91899e+07	2.2572e+07	1.64316e+07	1.76704e+07	1.62083e+07	1.76316e+07
Tb927.10.12130	Ubiquitin family, putative	10		0.869375	0.237126	26.3501	26.5369	26.643	26.4516	26.0614	26.3962	8.55381e+07	9.7365e+07	1.04795e+08	9.17722e+07	7.00251e+07	8.83206e+07
Tb927.10.12180	hypothetical protein, conserved	9		0.891924	0.113405	26.1166	26.1502	26.1775	26.1271	25.844	25.9648	7.27592e+07	7.44724e+07	7.5897e+07	7.32879e+07	6.02324e+07	6.54934e+07
Tb927.10.12210	ribulose-5-phosphate 3-epimerase, putative	2		1.00813	0.900168	27.5019	27.6742	27.5465	27.7096	27.5244	27.5211	1.90057e+08	2.14179e+08	1.96036e+08	2.19495e+08	1.93044e+08	1.92611e+08
Tb927.10.12240	3-ketoacyl-CoA reductase, putative	13		1.09123	0.35095	28.9699	29.1612	29.0614	29.3779	29.0396	29.138	5.25793e+08	6.00346e+08	5.60227e+08	6.9766e+08	5.51797e+08	5.90757e+08
Tb927.10.12290	UDP-Gal or UDP-GlcNAc-dependent glycosyltransferase, putative	8		0.976394	0.750039	28.1327	28.1317	28.0948	28.3488	27.8802	27.9841	2.94298e+08	2.9409e+08	2.8666e+08	3.41853e+08	2.47049e+08	2.65489e+08
Tb927.10.1230	Enriched in surface-labeled proteome protein 23	3		0.977839	0.813187	25.5075	25.8369	25.7307	25.6989	25.5635	25.7295	4.76995e+07	5.99348e+07	5.56806e+07	5.44688e+07	4.959e+07	5.56369e+07
Tb927.10.12360	hypothetical protein, conserved	4		0.940886	0.478549	26.2876	26.5672	26.5985	26.3538	26.3794	26.4734	8.19148e+07	9.94301e+07	1.01612e+08	8.57606e+07	8.7295e+07	9.31748e+07
Tb927.10.12370	gamma-glutamylcysteine synthetase	7		0.808208	0.184542	27.0097	27.5089	27.4773	27.0737	26.8669	27.1693	1.35127e+08	1.90981e+08	1.86849e+08	1.41256e+08	1.22388e+08	1.50932e+08
Tb927.10.12390	hypothetical protein, conserved	3		1.06565	0.358067	26.2622	26.3708	26.2108	26.5112	26.3313	26.2701	8.0484e+07	8.67746e+07	7.76687e+07	9.56481e+07	8.44304e+07	8.09281e+07
Tb927.10.12410	hypothetical protein, conserved	8		1.02567	0.743223	28.2964	28.5826	28.4533	28.6119	28.3746	28.4595	3.29664e+08	4.01994e+08	3.6753e+08	4.10255e+08	3.48021e+08	3.69125e+08
Tb927.10.12420	predicted S. cerevisiae Got1 homologue	3		0.857835	0.252634	25.8337	25.6572	26.134	25.6952	25.5194	25.7756	5.98039e+07	5.29156e+07	7.36421e+07	5.43268e+07	4.80969e+07	5.74438e+07
Tb927.10.12430	Noc2p family, putative	15		0.857604	0.103422	29.387	29.4805	29.2742	29.3301	29.0398	29.0977	7.02066e+08	7.49077e+08	6.49244e+08	6.74907e+08	5.51888e+08	5.74505e+08
Tb927.10.12450	SNARE domain-containing protein, putative	2		1.06783	0.158981	22.9768	23.0523	23.0238	23.0123	23.1605	23.16	8.25458e+06	8.69811e+06	8.52788e+06	8.46048e+06	9.37601e+06	9.37237e+06
Tb927.10.12470	hypothetical protein, conserved	5		0.995145	0.99327	26.5694	26.9674	26.8443	26.8802	26.7508	26.7535	9.95835e+07	1.31217e+08	1.20484e+08	1.23519e+08	1.12925e+08	1.13136e+08
Tb927.10.12490	kinesin, putative	5		0.704247	0.0901077	25.2473	25.8735	25.7497	24.9192	25.2186	25.2645	3.98287e+07	6.14745e+07	5.64212e+07	3.17263e+07	3.90442e+07	4.03064e+07
Tb927.10.1250	Aminoacyl-tRNA editing domain containing protein, putative	13		0.909323	0.113963	27.6913	27.8782	27.8165	27.7086	27.5819	27.6871	2.16721e+08	2.46705e+08	2.36367e+08	2.19337e+08	2.009e+08	2.16101e+08
Tb927.10.12500	P-type H+-ATPase, putative	32		0.838668	0.0728006	32.0816	32.3656	32.3601	32.0681	31.9351	32.0567	4.54491e+09	5.53358e+09	5.51262e+09	4.50267e+09	4.1061e+09	4.46701e+09
Tb927.10.12510	P-type H+-ATPase, putative	26		0.84998	0.0699017	31.5698	31.7924	31.8203	31.5701	31.397	31.5193	3.1876e+09	3.71928e+09	3.79199e+09	3.18819e+09	2.82783e+09	3.07781e+09
Tb927.10.12540	NADH-ubiquinone oxidoreductase complex I subunit, putative	4		0.883749	0.411667	24.959	25.3752	25.5352	25.0868	25.1734	25.1325	3.26138e+07	4.3522e+07	4.86247e+07	3.56355e+07	3.78389e+07	3.67827e+07
Tb927.10.12550	hypothetical protein, conserved	4		0.636178	0.112528	27.0377	26.8047	26.933	25.5	26.4467	26.6433	1.37768e+08	1.17227e+08	1.28128e+08	4.7454e+07	9.14669e+07	1.04814e+08
Tb927.10.12590	hypothetical protein, conserved	15		1.16203	0.14594	27.8245	28.0933	27.9341	28.3461	28.0657	28.0854	2.37685e+08	2.86378e+08	2.56445e+08	3.41213e+08	2.80951e+08	2.84811e+08
Tb927.10.1260	aspartyl-tRNA synthetase, putative	6		0.961415	0.528202	25.6015	25.7637	25.7714	25.7787	25.5882	25.5975	5.0911e+07	5.69694e+07	5.72752e+07	5.75668e+07	5.04448e+07	5.07714e+07
Tb927.10.12600	Small RNA 2'-O-methyltransferase	3		0.913725	0.215195	24.6097	24.7823	24.8532	24.6569	24.5238	24.6799	2.56019e+07	2.88551e+07	3.03074e+07	2.64525e+07	2.41205e+07	2.68783e+07
Tb927.10.12620	Protein of unknown function (DUF3648), putative	6		0.954982	0.355183	26.1972	26.3422	26.2124	26.1576	26.1256	26.2698	7.69387e+07	8.50756e+07	7.77528e+07	7.48537e+07	7.32123e+07	8.09072e+07
Tb927.10.12630	hypothetical protein, conserved	2		1.22993	0.0924964	25.1631	25.464	25.3293	25.7468	25.4126	25.6869	3.75705e+07	4.62827e+07	4.21584e+07	5.63065e+07	4.46639e+07	5.40151e+07
Tb927.10.12660	pumilio/PUF RNA binding protein 2	11		1.03167	0.672927	27.2801	27.2097	27.3687	27.4835	27.2834	27.2175	1.62973e+08	1.55215e+08	1.73304e+08	1.87652e+08	1.63349e+08	1.56054e+08
Tb927.10.12700	pyruvate dehydrogenase E1 alpha subunit, putative	24		1.11541	0.221239	32.0079	32.1077	32.106	32.419	32.0911	32.1657	4.31859e+09	4.62785e+09	4.62233e+09	5.7423e+09	4.57494e+09	4.81757e+09
Tb927.10.12710	heat shock protein 110, putative	35		1.11731	0.108151	33.3703	33.5718	33.5388	33.7267	33.5663	33.6714	1.11036e+10	1.27678e+10	1.24789e+10	1.4215e+10	1.2719e+10	1.36807e+10
Tb927.10.12720	Bait On Hook 1	6		0.914977	0.478519	26.5985	27.062	26.919	26.6901	26.6635	26.8706	1.01614e+08	1.40109e+08	1.26886e+08	1.08272e+08	1.06297e+08	1.227e+08
Tb927.10.12740	Zinc finger CCCH domain-containing protein 35	7		1.00647	0.906462	25.967	26.0427	26.1216	26.1152	25.9459	26.0964	6.55926e+07	6.91272e+07	7.30114e+07	7.26886e+07	6.46411e+07	7.1746e+07
Tb927.10.1280	Domain of unknown function (DUF4499), putative	2		0.941487	0.483815	26.093	25.9591	26.2326	26.1607	25.8846	25.9775	7.15761e+07	6.5231e+07	7.88491e+07	7.50184e+07	6.195e+07	6.6069e+07
Tb927.10.12810	cholinephosphate cytidylyltransferase A, putative	5		1.02501	0.616656	26.8687	27.0071	26.9266	26.9807	26.8763	27.0504	1.22541e+08	1.34877e+08	1.27563e+08	1.32431e+08	1.23188e+08	1.38991e+08
Tb927.10.12840	mitochondrial carrier protein	6		0.877275	0.244999	30.9805	31.3431	31.2635	31.0171	30.8692	31.1456	2.11865e+09	2.72403e+09	2.5779e+09	2.17306e+09	1.96134e+09	2.37548e+09
Tb927.10.12850	ttaggg binding factor	3		1.29851	0.123237	26.3425	26.1601	26.6853	27.0105	26.5948	26.7316	8.50889e+07	7.49873e+07	1.07912e+08	1.35199e+08	1.01353e+08	1.11433e+08
Tb927.10.12870	Basal body protein	2		0.934145	0.681457	23.8931	24.3399	24.1472	23.1732	24.2742	24.3909	1.55795e+07	2.12349e+07	1.85788e+07	9.45854e+06	2.02889e+07	2.19978e+07
Tb927.10.12910.2	hypothetical protein, conserved	4		0.957915	0.68731	24.7458	25.0024	25.1225	25.0198	24.7739	24.9057	2.81336e+07	3.36103e+07	3.6527e+07	3.40178e+07	2.86862e+07	3.14312e+07
Tb927.10.12920	Flagellum attachment zone protein 18	3		1.90333	0.0692883	22.2115	21.6599	21.356	23.1532	22.6377	22.196	4.85655e+06	3.31336e+06	2.68414e+06	9.32847e+06	6.5258e+06	4.80453e+06
Tb927.10.12930	hypothetical protein, conserved	3		1.30559	0.0725077	26.2741	26.4015	26.1987	26.9446	26.5629	26.4851	8.11489e+07	8.86417e+07	7.70178e+07	1.29165e+08	9.91363e+07	9.39298e+07
Tb927.10.12960	Ras-related protein Rab5A	9		1.05306	0.512237	27.8801	28.0894	28.0351	28.2173	27.9418	28.0639	2.47025e+08	2.85589e+08	2.75039e+08	3.12081e+08	2.57822e+08	2.806e+08
Tb927.10.12970	AN1-like zinc finger, putative	3		1.18345	0.0865229	24.1212	24.3876	24.4836	24.5365	24.595	24.6126	1.82472e+07	2.19476e+07	2.34582e+07	2.43353e+07	2.53419e+07	2.56531e+07
Tb927.10.12980	Multisite-specific tRNA:(cytosine-C(5))-methyltransferase, putative	9		0.953824	0.602716	26.5006	26.7076	26.8359	26.6408	26.5085	26.7032	9.49484e+07	1.09597e+08	1.19788e+08	1.04634e+08	9.54646e+07	1.09259e+08
Tb927.10.12990	predicted ankyrin repeat family protein	4		0.990216	0.817072	26.5539	26.723	26.6161	26.6325	26.63	26.5927	9.85192e+07	1.10768e+08	1.02858e+08	1.04033e+08	1.03853e+08	1.01206e+08
Tb927.10.13000	cAMP phosphodiesterase A, putative	8		0.99332	0.900806	26.0944	26.0819	26.2354	26.2838	25.9561	26.1295	7.16475e+07	7.10299e+07	7.90051e+07	8.16973e+07	6.50954e+07	7.34089e+07
Tb927.10.13010	cAMP-dependent protein kinase catalytic subunit 3	5		0.960347	0.546248	26.0963	26.3066	26.1846	26.2316	26.0125	26.1674	7.17422e+07	8.30023e+07	7.62699e+07	7.87929e+07	6.76944e+07	7.53668e+07
Tb927.10.13020	Vacuolar protein sorting-associated protein 16 homolog, putative	4		1.10568	0.728157	25.6301	25.1979	25.3858	25.9962	25.4403	25.101	5.19305e+07	3.84886e+07	4.38412e+07	6.69319e+07	4.55289e+07	3.59881e+07
Tb927.10.1310	Domain of unknown function (DUF4042), putative	8		1.01664	0.647894	26.0095	25.9888	26.0392	26.0967	25.951	26.0578	6.75516e+07	6.65895e+07	6.89554e+07	7.17592e+07	6.48656e+07	6.98509e+07
Tb927.10.13110	Outer arm dynein light chain 7	2		1.13828	0.49509	23.7558	24.2025	24.323	23.9444	24.3454	24.548	1.41649e+07	1.93055e+07	2.09869e+07	1.61434e+07	2.13152e+07	2.45291e+07
Tb927.10.13180	Nrap protein, putative	19		1.15328	0.252854	28.2247	28.3926	28.3592	28.785	28.3322	28.4425	3.13674e+08	3.52384e+08	3.4433e+08	4.62523e+08	3.37942e+08	3.648e+08
Tb927.10.13190	actin-related protein 2/3 complex subunit 1, putative	2		1.46166	0.0703686	22.281	22.7184	21.9414	22.8168	22.8238	23.0375	5.09613e+06	6.90127e+06	4.02722e+06	7.38838e+06	7.42436e+06	8.60976e+06
Tb927.10.1320	hypothetical protein, conserved	4		1.05514	0.588422	25.1646	25.3628	25.5053	25.6018	25.3456	25.3208	3.76104e+07	4.31473e+07	4.76294e+07	5.09217e+07	4.26355e+07	4.1909e+07
Tb927.10.13200	kinetoplast ribosomal PPR-repeat containing protein 4	2		1.22487	0.409334	22.0739	21.8546	22.2333	21.7964	22.5619	22.5771	4.41477e+06	3.79223e+06	4.93037e+06	3.64236e+06	6.19188e+06	6.25729e+06
Tb927.10.13210	dolichyl-P-Man:GDP-ManGlcNAc2-PP-dolichyl beta-1,4-mannosyltransferase, putative	2		1.00873	0.752287	24.3065	24.3437	24.3366	24.3708	24.2745	24.3771	2.07484e+07	2.12908e+07	2.11859e+07	2.16944e+07	2.02935e+07	2.17891e+07
Tb927.10.13230	hypothetical protein, conserved	3		1.68568	0.051822	23.7525	23.6289	23.5649	24.8253	24.2975	23.9547	1.41321e+07	1.2972e+07	1.24088e+07	2.97285e+07	2.06192e+07	1.62587e+07
Tb927.10.13240	hypothetical protein, conserved	5		0.949417	0.493129	24.4337	24.7355	24.6465	24.5179	24.5058	24.5826	2.26606e+07	2.7933e+07	2.62632e+07	2.40228e+07	2.38219e+07	2.51244e+07
Tb927.10.13250	hypothetical protein, conserved	8		1.13319	0.308505	25.8411	26.3095	26.3349	26.4454	26.2739	26.3537	6.011e+07	8.31678e+07	8.46415e+07	9.13828e+07	8.11408e+07	8.57518e+07
Tb927.10.13270	Periodic tryptophan protein 2 homolog, putative	12		1.11864	0.154829	28.1233	28.2031	28.2866	28.3625	28.2293	28.4984	2.92389e+08	3.09015e+08	3.27417e+08	3.45118e+08	3.14685e+08	3.79214e+08
Tb927.10.13280	hypothetical protein, conserved	50		1.18856	0.0647473	29.9177	29.9294	29.8658	30.3353	30.0413	30.0659	1.01423e+09	1.02247e+09	9.78364e+08	1.3547e+09	1.10493e+09	1.12396e+09
Tb927.10.13300	Mitochondrial ribosomal protein S8	6		1.03805	0.658442	25.5817	26.0736	25.8128	25.8777	25.8891	25.9049	5.02187e+07	7.06233e+07	5.89421e+07	6.16526e+07	6.21456e+07	6.28267e+07
Tb927.10.13320	DNA-directed RNA polymerase II/III subunit, putative	4		1.2043	0.413384	23.4795	23.7013	23.5038	24.234	23.7449	23.397	1.16956e+07	1.36394e+07	1.18948e+07	1.97316e+07	1.40585e+07	1.1046e+07
Tb927.10.13360	Elongation factor Tu, mitochondrial	20		1.04264	0.515688	31.4269	31.6246	31.5721	31.707	31.4984	31.5985	2.88697e+09	3.31092e+09	3.19258e+09	3.50562e+09	3.03354e+09	3.25169e+09
Tb927.10.13380	Origin recognition complex subunit 4-like protein	6		0.363138	0.367862	26.0934	28.6401	25.9262	26.2333	25.818	25.9095	7.15959e+07	4.18342e+08	6.37642e+07	7.8886e+07	5.91546e+07	6.30295e+07
Tb927.10.13430	citrate synthase, putative	13		0.945047	0.455325	30.6652	30.7547	30.7161	30.8308	30.5014	30.5373	1.70268e+09	1.81166e+09	1.76381e+09	1.90988e+09	1.52e+09	1.55822e+09
Tb927.10.13450	hypothetical protein, conserved	11		1.14679	0.205363	27.3089	27.1219	27.1994	27.6197	27.2376	27.3444	1.66259e+08	1.46049e+08	1.54111e+08	2.06237e+08	1.58242e+08	1.70404e+08
Tb927.10.13470	PA26 p53-induced protein (sestrin), putative	2		2.30682	0.123732	21.2527	21.0016	20.635	22.898	22.0205	21.1287	2.49858e+06	2.09949e+06	1.62832e+06	7.81617e+06	4.25419e+06	2.29286e+06
Tb927.10.13500	60S ribosomal protein L10a	16		1.12094	0.408415	32.2343	32.1122	32.1417	32.6223	32.1793	32.131	5.05219e+09	4.64218e+09	4.73824e+09	6.61139e+09	4.86343e+09	4.70327e+09
Tb927.10.13510	zinc metallopeptidase, putative	10		0.91511	0.0682981	27.8069	27.9658	27.9341	27.8019	27.7473	27.7779	2.34805e+08	2.62138e+08	2.56448e+08	2.33991e+08	2.25311e+08	2.30135e+08
Tb927.10.13517	40S ribosomal protein S27-like, putative	3		0.941588	0.604523	31.5848	31.9742	31.9257	31.8316	31.599	31.8126	3.22093e+09	4.21892e+09	4.07941e+09	3.82179e+09	3.25276e+09	3.77185e+09
Tb927.10.13520	Zn-finger in Ran binding protein and others/FYVE zinc finger, putative	2		1.29201	0.0848327	23.1397	23.0318	22.6403	23.3947	23.3847	23.1774	9.24142e+06	8.57572e+06	6.5375e+06	1.10279e+07	1.09523e+07	9.48617e+06
Tb927.10.13540	RNA-binding protein, putative	4		1.07234	0.587258	23.0518	23.0035	23.7443	23.4308	23.437	23.3573	8.69523e+06	8.40903e+06	1.40521e+07	1.13078e+07	1.1356e+07	1.07464e+07
Tb927.10.13550	hypothetical protein, conserved	7		1.06895	0.780126	26.344	26.5727	26.3664	26.9206	26.2833	26.2808	8.51794e+07	9.98146e+07	8.65122e+07	1.27029e+08	8.1668e+07	8.15285e+07
Tb927.10.13560	mevalonate-diphosphate decarboxylase	11		0.892242	0.169154	28.9223	29.045	29.0097	28.9445	28.6368	28.8868	5.08727e+08	5.53897e+08	5.40476e+08	5.16625e+08	4.17374e+08	4.96354e+08
Tb927.10.13600	Cardiolipin-dependent protein 18kDa	2		1.09593	0.872654	27.8736	27.4389	27.5847	28.348	27.5079	27.2259	2.45917e+08	1.81936e+08	2.01285e+08	3.41671e+08	1.90851e+08	1.56971e+08
Tb927.10.13610	zinc-finger of a C2HC-type/Double zinc ribbon, putative	6		1.02068	0.808529	24.9175	25.0523	24.5407	24.9859	24.8798	24.773	3.16894e+07	3.47931e+07	2.44061e+07	3.32283e+07	3.08714e+07	2.86684e+07
Tb927.10.13650	ADP-ribosylation factor-like protein 2-binding protein, putative	3		0.931578	0.546053	25.3945	25.8189	25.7092	25.4159	25.6194	25.6046	4.41084e+07	5.91918e+07	5.48581e+07	4.47673e+07	5.15471e+07	5.10223e+07
Tb927.10.13660	Domain of unknown function DUF21, putative	3		0.816598	0.159385	25.5235	25.9409	25.7074	25.5132	25.1998	25.5841	4.82329e+07	6.4415e+07	5.47905e+07	4.78892e+07	3.85378e+07	5.03029e+07
Tb927.10.13670	serine/threonine protein phosphatase 5	15		1.17786	0.0928826	28.2942	28.2746	28.3007	28.7255	28.4251	28.4047	3.29165e+08	3.24706e+08	3.30635e+08	4.43851e+08	3.60414e+08	3.55346e+08
Tb927.10.13710	Activator of Hsp90 ATPase, N-terminal/Activator of Hsp90 ATPase homolog 1-like protein, putative	8		1.05206	0.560046	28.4935	28.6704	28.8112	28.8346	28.5875	28.7787	3.77929e+08	4.27219e+08	4.71007e+08	4.78709e+08	4.03366e+08	4.60514e+08
Tb927.10.13720	RNA-binding protein 29, putative	8		1.01603	0.604984	29.2144	29.3108	29.2536	29.325	29.2254	29.297	6.2287e+08	6.65951e+08	6.40024e+08	6.7251e+08	6.2764e+08	6.59604e+08
Tb927.10.13730	60S ribosomal protein L7, putative	9		1.24372	0.162927	27.7629	27.5474	27.5798	28.2508	27.7371	27.7996	2.27759e+08	1.96157e+08	2.00603e+08	3.19392e+08	2.23714e+08	2.33622e+08
Tb927.10.13740	synaptotagmin, putative	6		1.03268	0.675496	27.2935	27.5145	27.3875	27.5545	27.2954	27.4811	1.64502e+08	1.91726e+08	1.75568e+08	1.97121e+08	1.64716e+08	1.87338e+08
Tb927.10.13830	Presequence translocase-associated motor 27	4		0.865616	0.141253	27.9233	28.2777	28.1206	27.9011	27.8359	27.9783	2.54544e+08	3.25412e+08	2.91847e+08	2.50644e+08	2.39574e+08	2.64427e+08
Tb927.10.13850	ATP12 chaperone protein, putative	5		1.47191	0.0596388	24.7751	24.828	24.6033	25.6559	25.0746	25.0776	2.87118e+07	2.97826e+07	2.54871e+07	5.28699e+07	3.53347e+07	3.54088e+07
Tb927.10.13860	GPI-anchor transamidase subunit 8 (GPI8)	5		1.42168	0.0532709	25.0266	24.6247	25.0361	25.6618	25.2691	25.2807	3.41797e+07	2.58693e+07	3.44049e+07	5.30853e+07	4.04362e+07	4.07615e+07
Tb927.10.13870	tubulin tyrosine ligase protein, putative	5		0.892032	0.350757	25.0066	24.9263	25.0413	25.1346	24.5536	24.7312	3.37082e+07	3.18829e+07	3.45293e+07	3.68349e+07	2.46251e+07	2.78507e+07
Tb927.10.1390	Hypoxanthine-guanine-xanthine phosphoribosyltransferase	11		1.10892	0.265994	31.1348	31.1284	31.2273	31.5061	31.1499	31.2606	2.35773e+09	2.34741e+09	2.51385e+09	3.04992e+09	2.38268e+09	2.57269e+09
Tb927.10.13950	tubulin-specific chaperone, putative	7		1.03866	0.71808	27.7752	27.7918	27.8608	28.0747	27.684	27.8067	2.29705e+08	2.32368e+08	2.43746e+08	2.82705e+08	2.15633e+08	2.3477e+08
Tb927.10.13970	uracil-DNA glycosylase, putative	4		0.949418	0.611339	24.4163	24.7667	24.7098	24.6792	24.5528	24.4509	2.23887e+07	2.85439e+07	2.74395e+07	2.68641e+07	2.46113e+07	2.29324e+07
Tb927.10.13980	btb/poz domain containing protein, putative	4		1.0823	0.300945	26.4061	26.6051	26.5819	26.6931	26.5028	26.7369	8.89271e+07	1.02075e+08	1.00448e+08	1.08501e+08	9.50916e+07	1.11842e+08
Tb927.10.13990	Pentatricopeptide repeat protein (PPR), putative	3		0.852531	0.0631088	25.2488	25.3207	25.3195	25.1736	24.8854	25.1244	3.98704e+07	4.1907e+07	4.18714e+07	3.78463e+07	3.09929e+07	3.65753e+07
Tb927.10.1400	hypoxanthine-guanine phosphoribosyltransferase	6		0.932468	0.207051	30.5381	30.601	30.6453	30.6013	30.3909	30.4839	1.55913e+09	1.62867e+09	1.67943e+09	1.62892e+09	1.40795e+09	1.50167e+09
Tb927.10.14000	aconitase	37		1.11763	0.191023	33.6109	33.7103	33.6415	33.9898	33.6738	33.7636	1.31185e+10	1.40541e+10	1.34e+10	1.70587e+10	1.37036e+10	1.45828e+10
Tb927.10.14010	tubulin cofactor C domain-containing protein RP2	10		1.13236	0.22688	29.0338	29.4167	29.3869	29.5404	29.3786	29.4823	5.49599e+08	7.16673e+08	7.0198e+08	7.80819e+08	6.97971e+08	7.49971e+08
Tb927.10.14020	hypothetical protein, conserved	4		1.10156	0.550063	25.1013	25.0196	25.0119	25.4213	25.2492	24.8178	3.59944e+07	3.4014e+07	3.38317e+07	4.49332e+07	3.988e+07	2.95728e+07
Tb927.10.14030	hypothetical protein, conserved	8		1.24177	0.0503833	28.5248	28.507	28.5106	29.0355	28.6851	28.7335	3.86204e+08	3.81485e+08	3.82426e+08	5.50244e+08	4.31601e+08	4.46327e+08
Tb927.10.14090	transporter, putative	3		0.741568	0.0728801	27.2639	27.7699	27.6857	27.2387	27.007	27.2177	1.6116e+08	2.2886e+08	2.15883e+08	1.58366e+08	1.34874e+08	1.56078e+08
Tb927.10.14110	13 kDa deflagellation-inducible protein, putative	2		1.098	0.466136	25.9437	26.209	26.1131	26.2347	25.9693	26.4405	6.45424e+07	7.75677e+07	7.25815e+07	7.8967e+07	6.5695e+07	9.10698e+07
Tb927.10.14130	SRP19 protein, putative	5		0.995731	0.906603	26.6046	26.6473	26.72	26.6787	26.6996	26.5744	1.02044e+08	1.05105e+08	1.10543e+08	1.07419e+08	1.0899e+08	9.99276e+07
Tb927.10.14140	pyruvate kinase 1	22		0.887874	0.181242	32.9077	32.9091	32.8501	32.9281	32.605	32.5943	8.05735e+09	8.0652e+09	7.74235e+09	8.17219e+09	6.53236e+09	6.48447e+09
Tb927.10.14180	protein transport protein SEC13	10		0.958759	0.503062	28.6871	28.9063	28.9109	28.8277	28.7622	28.7419	4.32198e+08	5.03094e+08	5.04725e+08	4.76428e+08	4.55283e+08	4.48919e+08
Tb927.10.14190	hypothetical protein, conserved	8		0.927802	0.26766	26.4975	26.4182	26.4062	26.4922	26.2301	26.2627	9.47451e+07	8.96751e+07	8.89328e+07	9.43941e+07	7.87107e+07	8.05128e+07
Tb927.10.1420	metallo-peptidase, Clan MG, Family M24	10		0.930408	0.428146	29.102	29.4183	29.3425	29.2993	29.0816	29.18	5.76212e+08	7.1744e+08	6.80709e+08	6.60665e+08	5.68104e+08	6.08192e+08
Tb927.10.14240	N-myristoyltransferase	10		1.12556	0.285431	29.8403	29.7875	29.7957	30.2195	29.8025	29.879	9.61258e+08	9.26652e+08	9.31971e+08	1.25018e+09	9.36386e+08	9.87372e+08
Tb927.10.14280	mitochondrial carrier protein	3		1.06095	0.639067	26.7486	26.9953	26.8771	27.1522	26.6977	27.0013	1.12756e+08	1.33781e+08	1.23254e+08	1.49146e+08	1.08844e+08	1.34341e+08
Tb927.10.1430	hypothetical protein, conserved	4		1.21288	0.135269	27.1348	26.7883	26.8516	27.4061	27.057	27.1477	1.47361e+08	1.15897e+08	1.21096e+08	1.77856e+08	1.39627e+08	1.48691e+08
Tb927.10.14300	MEKK-related kinase 1, putative	6		1.02695	0.666369	24.2997	24.5854	24.5198	24.5594	24.5224	24.4514	2.06508e+07	2.51742e+07	2.40542e+07	2.47247e+07	2.40973e+07	2.29405e+07
Tb927.10.14310	hypothetical protein, conserved	3		0.828065	0.392456	23.9361	24.6572	23.9475	23.8624	23.9744	24.0074	1.60509e+07	2.64581e+07	1.61775e+07	1.52508e+07	1.64824e+07	1.6863e+07
Tb927.10.14320	Flagellum attachment zone protein 9	19		0.992553	0.898302	27.6819	27.8683	27.766	27.8714	27.5989	27.8057	2.15313e+08	2.45008e+08	2.28245e+08	2.45537e+08	2.03282e+08	2.34618e+08
Tb927.10.14330	Utp14 protein, putative	11		1.01362	0.784707	28.3189	28.512	28.4868	28.5017	28.383	28.496	3.34839e+08	3.82803e+08	3.76179e+08	3.80084e+08	3.50056e+08	3.78578e+08
Tb927.10.14340	hypothetical protein, conserved	10		1.16577	0.214789	27.0487	27.3195	27.3397	27.5924	27.2264	27.5442	1.38829e+08	1.67495e+08	1.69853e+08	2.02366e+08	1.57028e+08	1.95716e+08
Tb927.10.14350	hypothetical protein, conserved	2		1.13976	0.0503453	26.3773	26.532	26.5335	26.758	26.638	26.6142	8.71654e+07	9.70324e+07	9.71336e+07	1.13491e+08	1.04433e+08	1.02726e+08
Tb927.10.14370	hypothetical protein, conserved	2		0.69164	0.0704814	24.1791	24.4637	24.5306	23.7158	23.5749	24.2265	1.89943e+07	2.31362e+07	2.4236e+07	1.37771e+07	1.24957e+07	1.9629e+07
Tb927.10.14380	Hsp70 protein, putative	12		0.992026	0.881483	28.2354	28.3825	28.3358	28.4974	28.1733	28.231	3.16009e+08	3.4993e+08	3.38775e+08	3.78951e+08	3.02696e+08	3.15056e+08
Tb927.10.14390	FACT complex subunit POB3	12		0.968902	0.699208	28.8135	29.1225	29.0217	29.02	28.9004	28.9146	4.71761e+08	5.84444e+08	5.45014e+08	5.44356e+08	5.01047e+08	5.0602e+08
Tb927.10.14430	hypothetical protein, conserved	2		0.914908	0.0793269	25.237	25.3315	25.3837	25.1273	25.1982	25.2433	3.95453e+07	4.22232e+07	4.3778e+07	3.665e+07	3.8496e+07	3.97174e+07
Tb927.10.14440	b9 domain-containing protein 1	2		0.795268	0.217218	23.3035	23.8372	23.8818	23.1423	23.4318	23.5009	1.03527e+07	1.49873e+07	1.54571e+07	9.25796e+06	1.13156e+07	1.18711e+07
Tb927.10.14460	leucine-rich repeat protein (LRRP), putative	3		1.17567	0.361604	23.7641	24.2455	24.3921	24.4913	24.0953	24.5468	1.42464e+07	1.98889e+07	2.20174e+07	2.35838e+07	1.79235e+07	2.45097e+07
Tb927.10.14490	hypothetical protein, conserved	16		0.890922	0.0750833	29.9476	30.1345	30.0447	29.9354	29.7912	29.9023	1.03541e+09	1.17864e+09	1.10755e+09	1.02674e+09	9.29074e+08	1.00347e+09
Tb927.10.1450	plectin, putative	16		0.926582	0.279319	29.3327	29.5862	29.5144	29.4491	29.3118	29.3506	6.76108e+08	8.06e+08	7.66875e+08	7.32908e+08	6.66391e+08	6.84569e+08
Tb927.10.14500	hypothetical protein, conserved	12		0.988946	0.907131	30.1066	30.3905	30.3402	30.2663	30.1966	30.3383	1.15607e+09	1.40748e+09	1.35924e+09	1.29137e+09	1.23052e+09	1.35754e+09
Tb927.10.14520	Basal body protein	6		1.14852	0.242963	23.4835	23.8344	23.8352	24.1	23.8607	23.8018	1.1728e+07	1.49581e+07	1.49662e+07	1.79818e+07	1.52331e+07	1.46235e+07
Tb927.10.14530	19S proteasome non-atpase subunit 8	7		1.04099	0.573858	28.1635	28.3679	28.4048	28.4932	28.3051	28.3154	3.00652e+08	3.46412e+08	3.55374e+08	3.77849e+08	3.31646e+08	3.34028e+08
Tb927.10.14560	TPR repeat, putative	3		1.19564	0.541815	23.2963	23.1093	23.3684	24.0022	22.9987	23.3777	1.03013e+07	9.04869e+06	1.08291e+07	1.6803e+07	8.38097e+06	1.08993e+07
Tb927.10.14570	kinesin motor domain containing protein, putative	11		1.09226	0.251436	26.6792	26.7654	26.8174	27.0391	26.8302	26.7635	1.07462e+08	1.14074e+08	1.18262e+08	1.37906e+08	1.19314e+08	1.13928e+08
Tb927.10.14600	40S ribosomal protein S2, putative	13		0.986695	0.813598	32.0609	32.0966	32.0596	32.2606	31.9087	31.9649	4.4802e+09	4.59251e+09	4.47617e+09	5.14531e+09	4.03154e+09	4.19177e+09
Tb927.10.14610	leucine-rich repeat protein (LRRP), putative	17		0.949598	0.553337	28.1289	28.4125	28.3081	28.2067	28.0717	28.3481	2.93524e+08	3.57276e+08	3.32344e+08	3.0978e+08	2.82115e+08	3.41696e+08
Tb927.10.14680	ribosome biogenesis protein, putative	6		1.002	0.969055	27.7589	27.7836	27.8456	27.8733	27.7246	27.7964	2.27116e+08	2.3104e+08	2.41198e+08	2.45864e+08	2.2178e+08	2.33109e+08
Tb927.10.14690	syntaxin, putative	3		1.19184	0.426256	24.1749	23.8152	23.8077	24.5916	24.0619	23.8259	1.89393e+07	1.47599e+07	1.46839e+07	2.52824e+07	1.75129e+07	1.48695e+07
Tb927.10.14700	hypothetical protein, conserved	4		0.856629	0.080964	28.9918	29.2518	29.2308	28.9754	28.8488	28.9905	5.33833e+08	6.39233e+08	6.30007e+08	5.27783e+08	4.8344e+08	5.33342e+08
Tb927.10.14720	peroxin 13	3		1.27536	0.12672	24.8445	24.7343	24.7308	25.2948	25.2475	24.7659	3.01256e+07	2.7911e+07	2.78421e+07	4.11625e+07	3.98353e+07	2.85289e+07
Tb927.10.14730	chaperone protein DnaJ, putative	10		0.891673	0.14791	26.1974	26.4336	26.2989	26.2484	26.0354	26.1518	7.69497e+07	9.06393e+07	8.25565e+07	7.97158e+07	6.87751e+07	7.45572e+07
Tb927.10.14740	hypothetical protein, conserved	10		1.17492	0.317505	27.6933	27.4437	27.4048	28.0506	27.6692	27.4768	2.17025e+08	1.82552e+08	1.77695e+08	2.78019e+08	2.13437e+08	1.86791e+08
Tb927.10.14750	fibrillarin, putative	13		0.995561	0.967988	31.5369	31.7707	31.7616	31.7349	31.5982	31.7248	3.11568e+09	3.66371e+09	3.6409e+09	3.57393e+09	3.25095e+09	3.54915e+09
Tb927.10.14770	Associated kinase of Tb14-3-3	15		1.02548	0.746229	28.7903	29.1216	29.0673	29.1188	28.9205	29.0629	4.64252e+08	5.84071e+08	5.625e+08	5.82951e+08	5.08104e+08	5.60812e+08
Tb927.10.14790	metallo-peptidase, Clan MG, Family M24	15		1.08932	0.241337	32.4385	32.4335	32.5053	32.7277	32.4394	32.5672	5.82061e+09	5.8002e+09	6.09651e+09	7.11243e+09	5.82396e+09	6.36352e+09
Tb927.10.14810	multiprotein-bridging factor 1, putative	7		1.05219	0.686871	27.8717	28.4449	28.4422	28.2599	28.2478	28.5258	2.45586e+08	3.65397e+08	3.64726e+08	3.21433e+08	3.18728e+08	3.86468e+08
Tb927.10.14820	Mitochondrial ADP/ATP carrier protein 5c	13		0.968644	0.547332	34.2694	34.3936	34.328	34.3963	34.1769	34.2743	2.07064e+10	2.25694e+10	2.1566e+10	2.26102e+10	1.9421e+10	2.07774e+10
Tb927.10.14860	NADH-ubiquinone oxidoreductase B14 subunit	13		1.01383	0.82484	28.2463	28.3479	28.3424	28.4616	28.2738	28.2537	3.18407e+08	3.41641e+08	3.40351e+08	3.69654e+08	3.24535e+08	3.20041e+08
Tb927.10.14870	hypothetical protein, conserved	11		1.0517	0.661689	28.2415	28.3954	28.3065	28.6197	28.1977	28.3149	3.17358e+08	3.53066e+08	3.31981e+08	4.12463e+08	3.07859e+08	3.3391e+08
Tb927.10.14890	C-terminal motor kinesin, putative	26		0.993011	0.889596	29.9339	30.0808	30.0231	30.1446	29.8862	29.9682	1.02563e+09	1.13559e+09	1.09109e+09	1.18693e+09	9.92308e+08	1.05035e+09
Tb927.10.14910	Sarcalumenin, putative	2		0.964221	0.810008	23.0005	23.3939	23.47	23.2905	22.9487	23.4635	8.39145e+06	1.10219e+07	1.16192e+07	1.02601e+07	8.0953e+06	1.15668e+07
Tb927.10.14930	Zinc finger CCCH domain-containing protein 39	9		1.16093	0.140594	28.6103	28.8794	28.9392	29.1323	28.9122	29.0427	4.09796e+08	4.93833e+08	5.147e+08	5.88438e+08	5.05159e+08	5.52988e+08
Tb927.10.14950	Zinc finger CCCH domain-containing protein 40	13		1.05067	0.388913	29.8513	30.0986	29.9625	30.0792	29.9886	30.0676	9.68615e+08	1.14968e+09	1.04621e+09	1.13431e+09	1.06532e+09	1.12521e+09
Tb927.10.14980	intraflagellar transport protein 52	16		1.02732	0.670601	28.9505	29.1617	29.1312	29.229	29.0411	29.0923	5.18747e+08	6.00551e+08	5.87993e+08	6.29225e+08	5.52378e+08	5.72337e+08
Tb927.10.14990	intraflagellar transport protein 80	9		1.11769	0.378062	26.6212	26.7641	26.8818	27.1654	26.7184	26.8389	1.03222e+08	1.13973e+08	1.23663e+08	1.50519e+08	1.10417e+08	1.20036e+08
Tb927.10.1500	methionyl-tRNA synthetase, putative	34		1.01207	0.906474	31.4371	31.4921	31.6291	31.7062	31.3902	31.5027	2.90752e+09	3.02049e+09	3.32123e+09	3.50368e+09	2.81438e+09	3.04279e+09
Tb927.10.15000	hypothetical protein, conserved	7		1.14256	0.2348	26.558	26.7899	26.6657	27.0405	26.6447	26.8873	9.87998e+07	1.1603e+08	1.06454e+08	1.38038e+08	1.04916e+08	1.24131e+08
Tb927.10.15010	lipoic acid synthetase, mitochondrial precursor, putative	6		0.906256	0.257714	26.0154	25.7647	26.0898	25.8499	25.7579	25.8537	6.78282e+07	5.70089e+07	7.14205e+07	6.04791e+07	5.67431e+07	6.06375e+07
Tb927.10.15020	CMGC/DYRK protein kinase, putative	4		1.29401	0.245164	22.9204	23.5705	23.3704	23.8261	23.2718	23.8786	7.93804e+06	1.24571e+07	1.08439e+07	1.4872e+07	1.01279e+07	1.54236e+07
Tb927.10.15080	WD40 Repeat 1	4		1.07721	0.670858	24.1499	23.3776	23.0685	23.9242	23.7761	23.3888	1.86139e+07	1.08982e+07	8.79677e+06	1.59181e+07	1.43655e+07	1.09831e+07
Tb927.10.15170	hypothetical protein, conserved	10		0.98535	0.752409	27.9186	27.7998	27.942	27.9355	27.7802	27.8805	2.53717e+08	2.33653e+08	2.57852e+08	2.56706e+08	2.30504e+08	2.47095e+08
Tb927.10.15180	nucleosome assembly protein, putative	13		0.902096	0.0913849	30.0956	29.9979	30.0834	30.0217	29.8139	29.8896	1.14731e+09	1.07216e+09	1.1376e+09	1.09e+09	9.43779e+08	9.94624e+08
Tb927.10.1520	ras-related protein Rab21, putative	3		0.912181	0.269876	26.8289	27.1047	26.9897	26.9012	26.7158	26.9133	1.19206e+08	1.44319e+08	1.33264e+08	1.25335e+08	1.10223e+08	1.26385e+08
Tb927.10.15210	nuclear cap binding complex subunit CBP30	5		1.12118	0.396814	25.5806	25.3604	25.0987	25.7252	25.4822	25.3409	5.01801e+07	4.30762e+07	3.59303e+07	5.54694e+07	4.68727e+07	4.24996e+07
Tb927.10.15230	hypothetical protein, conserved	3		0.689995	0.0532427	24.1976	24.4316	24.2427	23.5174	24.1169	23.5621	1.92404e+07	2.26276e+07	1.98508e+07	1.20074e+07	1.81928e+07	1.23855e+07
Tb927.10.15270	metallo- peptidase, Clan MG, Family M24	9		0.89926	0.152659	29.7147	29.9247	29.8339	29.7794	29.5641	29.6697	8.81054e+08	1.01913e+09	9.56946e+08	9.21504e+08	7.93762e+08	8.54036e+08
Tb927.10.15280	Domain of Unknown Function (DUF1042), putative	7		1.02918	0.734344	27.132	27.3065	27.3515	27.4045	27.1326	27.3716	1.47073e+08	1.65986e+08	1.71247e+08	1.77651e+08	1.47135e+08	1.73653e+08
Tb927.10.15290	tubulin binding cofactor c, putative	13		1.00386	0.943371	25.7647	25.8355	25.5403	26.0606	25.6491	25.3818	5.70082e+07	5.98774e+07	4.87978e+07	6.99855e+07	5.26187e+07	4.37188e+07
Tb927.10.1530	hypothetical protein, conserved	4		0.977558	0.765495	24.0498	24.1695	23.9154	23.8907	24.1342	24.0125	1.73662e+07	1.88692e+07	1.5822e+07	1.55534e+07	1.84122e+07	1.69235e+07
Tb927.10.15360	hypothetical protein, conserved	19		0.924625	0.296229	28.3468	28.3392	28.3177	28.4078	28.0762	28.1597	3.41377e+08	3.39595e+08	3.34555e+08	3.56129e+08	2.83001e+08	2.99852e+08
Tb927.10.15380	U3 snoRNA-associated protein UTP11, putative	2		0.882937	0.546156	21.4995	21.9655	21.5066	20.9187	22.0516	21.2735	2.96479e+06	4.09528e+06	2.97942e+06	1.9822e+06	4.34711e+06	2.53492e+06
Tb927.10.15390	Flagellum attachment zone protein 7	7		0.889368	0.184877	26.1338	26.4438	26.3781	26.178	26.0754	26.2097	7.36315e+07	9.12826e+07	8.72143e+07	7.592e+07	7.07073e+07	7.76076e+07
Tb927.10.1540	ZC3H30	3		0.990572	0.882292	23.4477	21.1174	22.2449	23.307	22.1164	21.7735	1.14407e+07	2.27497e+06	4.97024e+06	1.0378e+07	4.54687e+06	3.58486e+06
Tb927.10.15410	glycosomal malate dehydrogenase	11		1.05917	0.186604	33.3295	33.3616	33.3204	33.5072	33.3359	33.4124	1.0794e+10	1.1037e+10	1.07261e+10	1.22089e+10	1.08423e+10	1.14322e+10
Tb927.10.15420	NADH dehydrogenase [ubiquinone] 1 alpha subcomplex assembly factor 5, putative	3		0.962171	0.724448	25.6495	25.8064	25.7748	25.2025	25.957	25.8044	5.2635e+07	5.86819e+07	5.74111e+07	3.86107e+07	6.51362e+07	5.85983e+07
Tb927.10.15430	Ankyrin repeats (3 copies), putative	7		1.00553	0.953987	26.3543	26.1858	26.1439	26.3924	26.1802	26.1303	8.57883e+07	7.63334e+07	7.41467e+07	8.80848e+07	7.60395e+07	7.34514e+07
Tb927.10.15440	hypothetical protein, conserved	2		0.993166	0.993801	23.6019	23.9803	23.9974	23.8948	23.8347	23.8533	1.27312e+07	1.65498e+07	1.67473e+07	1.5597e+07	1.49614e+07	1.51553e+07
Tb927.10.1550	proteasome regulatory non-ATP-ase subunit 5	18		0.974037	0.426682	30.085	30.1618	30.176	30.1299	30.038	30.1406	1.13887e+09	1.20116e+09	1.21309e+09	1.17487e+09	1.10236e+09	1.18364e+09
Tb927.10.15500	SNARE protein, putative	3		1.56814	0.246999	24.7452	24.6862	24.1222	25.722	25.1551	24.4141	2.81211e+07	2.6995e+07	1.82606e+07	5.53481e+07	3.7362e+07	2.23548e+07
Tb927.10.15520	signal recognition particle protein, putative	12		0.971645	0.656247	28.588	28.6286	28.7149	28.7622	28.4607	28.5708	4.03489e+08	4.1502e+08	4.40605e+08	4.55272e+08	3.69414e+08	3.98726e+08
Tb927.10.15530	ABC transport system ATP-binding protein, putative	21		0.854157	0.0675884	29.3424	29.6044	29.5658	29.3291	29.2061	29.3059	6.80688e+08	8.16247e+08	7.94702e+08	6.74426e+08	6.19328e+08	6.63665e+08
Tb927.10.15540	predicted VPS53-like domain protein	9		1.20555	0.147197	26.0911	26.4324	26.1183	26.6886	26.4147	26.3504	7.14842e+07	9.05602e+07	7.28448e+07	1.08157e+08	8.94559e+07	8.55564e+07
Tb927.10.15550	hypothetical protein, conserved	5		0.73904	0.520066	23.3977	22.4445	21.9303	22.7113	22.0435	21.9845	1.10515e+07	5.70766e+06	3.99651e+06	6.86718e+06	4.3227e+06	4.14939e+06
Tb927.10.15580	dynein light chain, putative	1		1.07139	0.293833	23.22	23.4331	23.4671	23.4061	23.501	23.5211	9.77041e+06	1.13256e+07	1.15958e+07	1.1116e+07	1.18719e+07	1.20378e+07
Tb927.10.15590	macrophage infectivity potentiator, precursor, putative	3		1.02678	0.187011	27.2306	27.2903	27.268	27.3265	27.2702	27.3066	1.57479e+08	1.64132e+08	1.61615e+08	1.68304e+08	1.61858e+08	1.66004e+08
Tb927.10.1560	Nucleolar protein 91	11		0.902836	0.0902999	28.706	28.8105	28.8016	28.7299	28.5298	28.6112	4.37889e+08	4.70789e+08	4.67895e+08	4.45222e+08	3.87561e+08	4.10037e+08
Tb927.10.15640	WD domain, G-beta repeat, putative	4		0.744557	0.065584	24.2018	24.1762	24.4171	24.041	23.5227	23.9178	1.92963e+07	1.89572e+07	2.24009e+07	1.7261e+07	1.20517e+07	1.58479e+07
Tb927.10.15660	hypothetical protein, conserved	9		0.817662	0.122649	27.1446	26.983	27.056	27.0101	26.4955	26.7655	1.48363e+08	1.32642e+08	1.39527e+08	1.35161e+08	9.46086e+07	1.14083e+08
Tb927.10.15700	hypothetical protein, conserved	5		1.1468	0.192096	25.6868	25.7645	25.7921	26.1465	25.7448	25.9189	5.4013e+07	5.70016e+07	5.81043e+07	7.42798e+07	5.62268e+07	6.34384e+07
Tb927.10.15710	mitochondrial carrier protein	6		1.14427	0.352217	27.7445	27.6078	27.6963	28.1853	27.694	27.6988	2.2487e+08	2.04539e+08	2.17482e+08	3.05218e+08	2.17137e+08	2.17861e+08
Tb927.10.15720	proteasome regulatory non-ATP-ase subunit 9	9		1.04447	0.577295	28.7442	29.0424	28.9189	29.088	28.8719	28.9409	4.49641e+08	5.52871e+08	5.07538e+08	5.70628e+08	4.91265e+08	5.15314e+08
Tb927.10.15730	SPRY domain/Ankyrin repeats (3 copies), putative	8		1.3002	0.283008	24.3548	23.9169	24.003	24.929	24.2391	24.1491	2.14545e+07	1.58379e+07	1.68119e+07	3.19422e+07	1.98008e+07	1.86034e+07
Tb927.10.15740	hypothetical protein, conserved	6		1.07787	0.349066	25.8951	25.9195	25.9178	26.1909	25.8629	25.984	6.24029e+07	6.34673e+07	6.33904e+07	7.6604e+07	6.10247e+07	6.63695e+07
Tb927.10.15750	Tripartite attachment complex protein 197	12		0.996633	0.966962	27.5815	27.9884	27.9707	27.7835	27.9045	27.8708	2.00845e+08	2.66294e+08	2.63035e+08	2.31028e+08	2.51239e+08	2.45448e+08
Tb927.10.15760	hypothetical protein, conserved	19		1.1254	0.11749	30.8345	30.8707	30.8707	31.1654	31.0282	30.8798	1.91471e+09	1.96344e+09	1.96339e+09	2.40839e+09	2.18984e+09	1.97584e+09
Tb927.10.15790	cytochrome c oxidase assembly protein COX19, putative	6		1.07442	0.879537	25.845	25.7605	25.997	26.4853	25.6471	25.6124	6.02712e+07	5.68449e+07	6.69717e+07	9.39419e+07	5.25461e+07	5.12995e+07
Tb927.10.1580	MICOS complex subunit MIC10-1	3		1.07574	0.451182	26.8087	27.1019	27.0237	27.2331	26.9211	27.0949	1.17547e+08	1.44038e+08	1.36445e+08	1.57759e+08	1.27073e+08	1.43344e+08
Tb927.10.15800	actin related protein 2, putative	3		0.862015	0.238089	24.2639	24.1662	24.113	24.1921	23.6477	24.0126	2.01442e+07	1.88253e+07	1.81438e+07	1.91661e+07	1.3142e+07	1.69244e+07
Tb927.10.15810	Fcf1, putative	5		0.796564	0.0876085	25.7494	25.8641	25.7035	25.6518	25.4817	25.1619	5.6409e+07	6.10765e+07	5.46429e+07	5.27168e+07	4.68559e+07	3.75385e+07
Tb927.10.15830	SUMO-interacting motif-containing protein	4		0.961328	0.668685	26.0017	26.1446	26.1311	26.0715	25.7532	26.2441	6.71888e+07	7.41818e+07	7.34942e+07	7.05168e+07	5.65579e+07	7.94809e+07
Tb927.10.15840	hypothetical protein, conserved	4		0.983551	0.845573	24.3028	24.3572	24.5542	24.5792	24.445	24.0866	2.06949e+07	2.14898e+07	2.46356e+07	2.5066e+07	2.28396e+07	1.78155e+07
Tb927.10.15850	Peroxisome biogenesis factor 12	6		1.05457	0.518145	26.9678	27.1913	27.1762	27.2847	27.0304	27.2481	1.31257e+08	1.53251e+08	1.51657e+08	1.63493e+08	1.37071e+08	1.59403e+08
Tb927.10.160.1	Kinetoplast poly(A) polymerase 2	2		0.893215	0.378842	23.5305	23.3614	23.3521	23.5829	23.0563	23.0568	1.2117e+07	1.07769e+07	1.07073e+07	1.25652e+07	8.7224e+06	8.72559e+06
Tb927.10.16020	pre-RNA processing PIH1/Nop17, putative	2		1.19063	0.36264	21.3864	22.1683	21.8975	21.8832	22.3482	22.0425	2.74116e+06	4.71344e+06	3.90656e+06	3.868e+06	5.3394e+06	4.31957e+06
Tb927.10.16040	oxidoreductase-protein, putative	3		1.12225	0.41178	24.7486	24.8309	24.5884	25.1593	24.6385	24.8312	2.81889e+07	2.98442e+07	2.52256e+07	3.7471e+07	2.61176e+07	2.98486e+07
Tb927.10.16060	hypothetical protein, conserved	2		0.746696	0.195733	24.0236	24.5865	24.5473	23.549	24.0942	24.2294	1.70534e+07	2.51923e+07	2.45174e+07	1.22729e+07	1.79097e+07	1.96691e+07
Tb927.10.16110	component of motile flagella 1	7		1.08199	0.198198	27.591	27.6436	27.5954	27.8592	27.6396	27.6626	2.02173e+08	2.09682e+08	2.02783e+08	2.43476e+08	2.09097e+08	2.1246e+08
Tb927.10.16120	inosine-5'-monophosphate dehydrogenase	28		1.00753	0.987144	32.025	32.0718	32.035	32.3148	31.8977	31.9122	4.36989e+09	4.51403e+09	4.40035e+09	5.34207e+09	4.00083e+09	4.04144e+09
Tb927.10.1620	phosphoserine/threonine/tyrosine-binding protein, putative	10		0.988984	0.85985	26.5808	26.6307	26.7598	26.9214	26.4982	26.4632	1.00373e+08	1.03902e+08	1.1363e+08	1.27104e+08	9.47854e+07	9.25144e+07
Tb927.10.1630	atp-binding cassette sub-family e member 1	17		0.923906	0.302174	30.2188	30.4135	30.4127	30.3233	30.0904	30.2866	1.24956e+09	1.43011e+09	1.42938e+09	1.34349e+09	1.14318e+09	1.3097e+09
Tb927.10.1660	hypothetical protein, conserved	2		0.746048	0.104197	25.5742	26.0695	26.1394	25.4663	25.6732	25.4262	4.99578e+07	7.04208e+07	7.39151e+07	4.63579e+07	5.35066e+07	4.50879e+07
Tb927.10.1680	histone deacetylase 1	2		0.812365	0.204058	22.4378	22.4773	22.3921	21.7022	22.1646	22.4468	5.68148e+06	5.83902e+06	5.50426e+06	3.41198e+06	4.70131e+06	5.71701e+06
Tb927.10.1690	cytosolic Fe-S cluster assembly factor NBP35, putative	3		1.13495	0.15266	25.4062	25.6961	25.4972	25.795	25.5981	25.7621	4.44661e+07	5.43635e+07	4.736e+07	5.82181e+07	5.07921e+07	5.69074e+07
Tb927.10.170	pseudouridine synthase, Cbf5p	14		1.01059	0.887192	30.3226	30.2557	30.3749	30.4585	30.2038	30.3278	1.34282e+09	1.28198e+09	1.3924e+09	1.47543e+09	1.23663e+09	1.3477e+09
Tb927.10.1720	ATP-dependent DEAD/H RNA helicase, putative	9		0.882248	0.0910308	28.2432	28.4678	28.4086	28.1942	28.1164	28.2718	3.17727e+08	3.71237e+08	3.56328e+08	3.0712e+08	2.90993e+08	3.24093e+08
Tb927.10.1730	Polyadenylation mediator complex protein PAMC3, putative	8		1.03857	0.635716	27.7459	27.9485	27.8452	28.0651	27.8114	27.8195	2.25079e+08	2.59031e+08	2.41131e+08	2.80821e+08	2.35534e+08	2.36862e+08
Tb927.10.1740	hypothetical protein, conserved	6		0.949578	0.815031	24.2005	24.7859	24.7973	24.4929	24.5	24.6389	1.92788e+07	2.89275e+07	2.91554e+07	2.36095e+07	2.37262e+07	2.61252e+07
Tb927.10.1770	hypothetical protein	1		1.07448	0.570414	21.6872	21.7539	21.8	21.914	21.5607	22.0381	3.37671e+06	3.53645e+06	3.65124e+06	3.95156e+06	3.09319e+06	4.30649e+06
Tb927.10.180	ATP synthase F1 subunit gamma protein, putative	9		0.817825	0.0800534	30.011	30.3933	30.2815	29.9682	29.864	30.0059	1.08195e+09	1.41028e+09	1.30511e+09	1.05032e+09	9.77126e+08	1.07811e+09
Tb927.10.1800	methyltransferase domain containing protein, putative	4		0.791643	0.0514592	24.7214	24.8618	24.9323	24.7085	24.3549	24.4239	2.76623e+07	3.04886e+07	3.20152e+07	2.74155e+07	2.14567e+07	2.25071e+07
Tb927.10.1830	syntaxin, putative	5		0.977893	0.815201	24.3474	24.3283	24.0442	24.2735	24.2502	24.1138	2.13445e+07	2.10648e+07	1.72991e+07	2.02796e+07	1.99548e+07	1.81541e+07
Tb927.10.1860	hypothetical protein, conserved	4		0.985745	0.839136	25.6488	25.8451	25.6109	25.753	25.604	25.6929	5.2609e+07	6.02776e+07	5.12444e+07	5.65492e+07	5.09996e+07	5.42425e+07
Tb927.10.1870.2	LSU ribosomal protein, mitochondrial, putative	3		0.99171	0.870906	25.112	25.285	25.234	25.0595	24.9668	25.5131	3.62643e+07	4.08831e+07	3.94642e+07	3.49678e+07	3.27916e+07	4.78853e+07
Tb927.10.1890	cysteine peptidase, Clan CA, family C2, putative	20		1.01657	0.748404	27.8092	27.8229	27.8717	27.8845	27.7415	27.9423	2.35174e+08	2.3743e+08	2.45594e+08	2.4779e+08	2.24402e+08	2.5791e+08
Tb927.10.190	40S ribosomal protein S6, putative	13		0.96137	0.658322	31.8187	32.1053	32.0782	32.0508	31.818	31.9703	3.78778e+09	4.62018e+09	4.53413e+09	4.44876e+09	3.78605e+09	4.20733e+09
Tb927.10.1930	hypothetical protein, conserved	2		1.01578	0.953729	24.7864	25.0535	24.9052	25.1582	24.3803	25.1566	2.89377e+07	3.4822e+07	3.1421e+07	3.74444e+07	2.18369e+07	3.74014e+07
Tb927.10.1950	leucine-rich repeat protein (LRRP), putative	2		1.19186	0.0749242	24.3219	24.1882	24.5158	24.6177	24.5045	24.677	2.0971e+07	1.9115e+07	2.39875e+07	2.5743e+07	2.38008e+07	2.68231e+07
Tb927.10.1960	hypothetical protein, conserved	14		0.798992	0.146515	27.5714	28.0285	27.5463	27.5267	27.2796	27.4108	1.99438e+08	2.73788e+08	1.96005e+08	1.93359e+08	1.6292e+08	1.78432e+08
Tb927.10.1970	CHAT domain containing protein, putative	15		0.96206	0.724708	27.3636	27.7148	27.6499	27.5076	27.3671	27.6915	1.72691e+08	2.20292e+08	2.10595e+08	1.90809e+08	1.73111e+08	2.16758e+08
Tb927.10.1980	hypothetical protein, conserved	7		1.13738	0.098669	25.9123	26.0589	26.0875	26.3335	26.1101	26.1689	6.31492e+07	6.99044e+07	7.1307e+07	8.456e+07	7.24308e+07	7.5445e+07
Tb927.10.2000.2	actin-like protein, putative	2		0.868591	0.0536367	23.6767	23.5967	23.6568	23.3532	23.3764	23.581	1.34093e+07	1.26854e+07	1.32253e+07	1.07156e+07	1.08892e+07	1.25482e+07
Tb927.10.2010	hexokinase	21		0.861913	0.0800672	33.1138	33.208	33.1572	33.1129	32.8093	32.898	9.29517e+09	9.92202e+09	9.57864e+09	9.28945e+09	7.52657e+09	8.00348e+09
Tb927.10.2020	hexokinase	20		0.872262	0.108343	33.0251	33.0965	33.0522	33.0404	32.7168	32.8064	8.74082e+09	9.18393e+09	8.90649e+09	8.83405e+09	7.05876e+09	7.51106e+09
Tb927.10.2030	Pentatricopeptide repeat protein (PPR), putative	2		0.960778	0.732134	21.143	20.8862	21.0495	21.0694	20.4892	21.2534	2.31561e+06	1.9381e+06	2.17042e+06	2.20047e+06	1.47185e+06	2.49984e+06
Tb927.10.2040	STE group serine/threonine-protein kinase, putative	12		0.927758	0.250724	26.4373	26.6448	26.6556	26.4951	26.4076	26.5185	9.0871e+07	1.04929e+08	1.05714e+08	9.45833e+07	8.90202e+07	9.61285e+07
Tb927.10.2050	hypothetical protein, conserved	2		1.04548	0.330611	23.8867	23.9471	23.8742	23.9781	23.8696	24.0483	1.55102e+07	1.61734e+07	1.5376e+07	1.65243e+07	1.53276e+07	1.7348e+07
Tb927.10.2060	hypothetical protein, conserved	4		1.08192	0.46992	25.9236	26.3191	26.1624	26.1162	26.215	26.4246	6.36493e+07	8.37216e+07	7.51052e+07	7.27369e+07	7.78937e+07	9.00709e+07
Tb927.10.2080	hypothetical protein, conserved	2		1.00217	0.936015	24.7584	25.1215	25.056	24.9428	24.948	25.0759	2.83806e+07	3.65035e+07	3.48825e+07	3.22503e+07	3.23666e+07	3.53659e+07
Tb927.10.2090	elongation factor 1-alpha	29		1.0088	0.905454	37.7809	37.9519	37.9231	38.0132	37.77	37.9062	2.36155e+11	2.65863e+11	2.60616e+11	2.77404e+11	2.34366e+11	2.57573e+11
Tb927.10.210	GPI transamidase component GAA1	2		0.660806	0.107361	25.8205	25.761	25.7103	25.6912	25.0049	24.5851	5.9258e+07	5.68649e+07	5.48991e+07	5.41772e+07	3.36677e+07	2.51675e+07
Tb927.10.2120	U1 small nuclear ribonucleoprotein C, putative	2		0.998952	0.995199	23.9978	24.2743	23.9518	24.2353	23.9575	24.0337	1.67522e+07	2.02899e+07	1.62265e+07	1.97494e+07	1.62896e+07	1.71737e+07
Tb927.10.2130	Vps51/Vps67, putative	4		0.911793	0.297478	24.8879	24.785	24.8437	24.8732	24.4824	24.7362	3.10462e+07	2.89079e+07	3.01081e+07	3.07307e+07	2.34396e+07	2.79478e+07
Tb927.10.2190	Protein of unknown function (DUF667), putative	7		0.963121	0.621064	29.0595	29.3045	29.3335	29.2168	29.1152	29.2158	5.59463e+08	6.6302e+08	6.76489e+08	6.23939e+08	5.81509e+08	6.23491e+08
Tb927.10.220	60S ribosomal protein L37a, putative	2		0.799772	0.162979	27.961	28.23	28.4445	27.6848	27.8764	28.1152	2.61275e+08	3.14822e+08	3.65303e+08	2.15754e+08	2.46401e+08	2.9075e+08
Tb927.10.2200	hypothetical protein, conserved	4		1.27121	0.0660802	26.2461	25.9715	26.1992	26.6612	26.2903	26.4948	7.95893e+07	6.57942e+07	7.7047e+07	1.06123e+08	8.20655e+07	9.45679e+07
Tb927.10.2220	PIWI-like protein	2		1.09582	0.761379	22.1647	21.6299	21.5933	22.1812	21.3533	22.1767	4.70169e+06	3.24524e+06	3.16401e+06	4.75564e+06	2.67911e+06	4.74086e+06
Tb927.10.2230	NADPH:adrenodoxin oxidoreductase, mitochondrial, putative	2		1.1354	0.618329	22.8923	19.9293	22.0316	22.7902	22.174	21.4454	7.78543e+06	998420	4.28722e+06	7.25315e+06	4.73208e+06	2.85561e+06
Tb927.10.2240	RNA binding protein	18		0.952076	0.457685	29.8656	29.9229	29.9568	30.015	29.7332	29.7695	9.78236e+08	1.01789e+09	1.04208e+09	1.08495e+09	8.92435e+08	9.15215e+08
Tb927.10.2250	ubiquitin-conjugating enzyme variant Kua homologue, putative	3		0.977564	0.741834	24.2262	24.1667	24.2064	24.2559	23.9252	24.293	1.96258e+07	1.88321e+07	1.93571e+07	2.00329e+07	1.59297e+07	2.05551e+07
Tb927.10.2260	Ubiquitin family, putative	4		1.28172	0.373746	24.8384	23.9963	24.602	25.3328	24.5668	24.5999	2.99997e+07	1.67344e+07	2.54646e+07	4.22611e+07	2.48505e+07	2.54272e+07
Tb927.10.2270	vacuolar protein sorting-associated protein 35, putative	15		1.29155	0.0731057	27.5813	27.5274	27.5716	28.2042	27.7943	27.7443	2.00823e+08	1.93451e+08	1.99468e+08	3.09243e+08	2.32768e+08	2.24838e+08
Tb927.10.230	proteasome subunit alpha type-5, putative	9		1.16366	0.42386	29.4101	29.1676	29.1481	29.8258	29.3352	29.1488	7.1338e+08	6.03028e+08	5.94929e+08	9.51629e+08	6.77309e+08	5.95208e+08
Tb927.10.2310	hypothetical protein, conserved	2		0.734902	0.192254	25.2638	25.5333	25.4652	24.3129	25.1062	25.3369	4.02871e+07	4.85612e+07	4.63238e+07	2.08401e+07	3.61183e+07	4.23798e+07
Tb927.10.2320	Nucleoporin NUP41	3		0.950164	0.659074	26.2581	26.6592	26.5371	26.3765	26.2947	26.576	8.0254e+07	1.05978e+08	9.73756e+07	8.71198e+07	8.23151e+07	1.00039e+08
Tb927.10.2340	SNARE domain containing protein, putative	2		1.01672	0.873198	25.4054	25.6947	25.6313	25.781	25.5747	25.4431	4.44424e+07	5.43104e+07	5.19743e+07	5.76573e+07	4.99733e+07	4.5617e+07
Tb927.10.2370	Lupus La protein homolog, putative	13		1.00149	0.991587	30.7636	30.929	30.9014	31.0215	30.7298	30.8394	1.82292e+09	2.04434e+09	2.0056e+09	2.17965e+09	1.78072e+09	1.92121e+09
Tb927.10.2380	Tetratricopeptide repeat, putative	21		1.14992	0.0842172	28.7711	29.0485	28.9513	29.1449	29.0563	29.1849	4.58105e+08	5.55219e+08	5.19061e+08	5.93576e+08	5.5825e+08	6.1029e+08
Tb927.10.240	peroxin 14, putative	12		1.0316	0.514381	29.2148	29.2702	29.2419	29.3734	29.1766	29.3052	6.23047e+08	6.47453e+08	6.34877e+08	6.95471e+08	6.06792e+08	6.63332e+08
Tb927.10.2440	Metacaspase-4	3		0.902519	0.360269	26.6032	26.3718	26.2856	26.4037	26.0525	26.355	1.01944e+08	8.68384e+07	8.18e+07	8.87798e+07	6.95954e+07	8.58309e+07
Tb927.10.2470	Cleft lip and palate transmembrane protein 1 (CLPTM1), putative	5		1.72231	0.219064	25.6648	24.7106	24.7437	26.5657	25.5075	25.2631	5.31966e+07	2.74556e+07	2.80924e+07	9.9326e+07	4.76999e+07	4.02659e+07
Tb927.10.2490	glucose-6-phosphate 1-dehydrogenase	18		0.987547	0.740196	29.0438	29.0867	29.1126	29.1376	28.9635	29.0831	5.53418e+08	5.70126e+08	5.80435e+08	5.90595e+08	5.23451e+08	5.68714e+08
Tb927.10.2510	hypothetical protein, conserved	7		0.979755	0.767478	26.0504	26.278	26.1076	26.18	25.9982	26.1718	6.94931e+07	8.13691e+07	7.23069e+07	7.60284e+07	6.70265e+07	7.55962e+07
Tb927.10.2520	PrimPol-like protein 2	6		1.2659	0.0562197	25.4128	25.6746	25.7165	26.1091	25.8233	25.8947	4.46685e+07	5.35579e+07	5.51346e+07	7.23828e+07	5.93733e+07	6.23833e+07
Tb927.10.2530	adenylate kinase, putative	11		0.844219	0.0925484	31.0224	31.318	31.307	30.9904	30.8833	31.0546	2.18101e+09	2.67708e+09	2.65667e+09	2.13325e+09	1.9806e+09	2.23026e+09
Tb927.10.2540	adenylate kinase, putative	2		1.10461	0.400198	24.4916	24.5959	24.8967	24.8937	24.6115	24.9211	2.35892e+07	2.53576e+07	3.12357e+07	3.11702e+07	2.56325e+07	3.17679e+07
Tb927.10.2550	malate dehydrogenase-related	6		0.967173	0.497518	27.0482	27.1278	27.162	27.1713	26.9755	27.0421	1.38774e+08	1.46646e+08	1.50166e+08	1.51142e+08	1.31953e+08	1.38192e+08
Tb927.10.2560	mitochondrial malate dehydrogenase	14		0.861626	0.294634	33.1834	32.8729	32.8889	33.0699	32.6252	32.5739	9.75412e+09	7.86559e+09	7.95305e+09	9.01629e+09	6.62482e+09	6.39303e+09
Tb927.10.2570	lysosomal alpha-mannosidase precursor, putative	3		1.17326	0.252639	25.1461	25.5039	25.3694	25.7946	25.3339	25.5682	3.71311e+07	4.75804e+07	4.33461e+07	5.82039e+07	4.2292e+07	4.97489e+07
Tb927.10.2580	Nucleolar protein 12 (25kDa), putative	2		1.15312	0.350646	27.8286	28.0147	27.6977	28.3328	28.0032	27.7864	2.38372e+08	2.71191e+08	2.17696e+08	3.3809e+08	2.6903e+08	2.31498e+08
Tb927.10.260	BolA-like protein, putative	2		1.06554	0.403568	26.0786	26.2469	26.1809	26.4003	26.1184	26.2537	7.08663e+07	7.96372e+07	7.60745e+07	8.85694e+07	7.28482e+07	8.0011e+07
Tb927.10.2610	Domain of unknown function (DUF1935), putative	7		1.05761	0.506003	26.1936	26.5269	26.3272	26.4993	26.3064	26.4958	7.67465e+07	9.66902e+07	8.4194e+07	9.48576e+07	8.29886e+07	9.46273e+07
Tb927.10.2620	CS domain containing protein, putative	7		1.08849	0.311999	28.6348	28.8738	28.8954	28.9899	28.7907	28.9952	4.16805e+08	4.91889e+08	4.99316e+08	5.33138e+08	4.64377e+08	5.35086e+08
Tb927.10.2630	Regulator of Vps4 activity in the MVB pathway, putative	2		0.828717	0.127011	25.4895	25.8244	25.9098	25.5573	25.4008	25.4815	4.71077e+07	5.94189e+07	6.30407e+07	4.93769e+07	4.42992e+07	4.68471e+07
Tb927.10.2640	intraflagellar transport protein 81	27		1.08036	0.282767	29.9875	30.1335	30.0597	30.3132	30.0511	30.1423	1.06448e+09	1.17782e+09	1.11912e+09	1.33405e+09	1.11247e+09	1.18502e+09
Tb927.10.2650	hypothetical protein, conserved	6		0.959123	0.171683	25.2399	25.2272	25.1871	25.2222	25.1153	25.1344	3.96237e+07	3.92783e+07	3.82003e+07	3.91407e+07	3.63452e+07	3.68298e+07
Tb927.10.2680	pyridine nucleotide-disulphide oxidoreductase, putative	6		1.07223	0.464673	24.2604	24.1368	24.2236	24.513	24.2366	24.1505	2.00964e+07	1.84461e+07	1.95897e+07	2.39409e+07	1.97677e+07	1.86224e+07
Tb927.10.2690	Trafficking protein Mon1, putative	2		0.98565	0.854097	23.5485	23.7226	23.491	23.3021	23.6223	23.7494	1.22685e+07	1.38429e+07	1.17898e+07	1.03427e+07	1.29125e+07	1.41021e+07
Tb927.10.270	60S ribosomal protein L32, putative	6		0.89056	0.204336	30.6654	30.8636	30.8081	30.7898	30.4615	30.5718	1.70295e+09	1.95382e+09	1.88004e+09	1.85634e+09	1.47855e+09	1.59597e+09
Tb927.10.2700	predicted WD40 repeat protein	9		0.986183	0.869128	27.5749	27.8525	27.6734	27.7823	27.549	27.7133	1.99927e+08	2.42348e+08	2.1406e+08	2.3083e+08	1.96373e+08	2.20063e+08
Tb927.10.2720	hypothetical protein, conserved	7		1.23609	0.245161	25.0139	24.697	24.6151	25.4174	24.9594	24.83	3.3879e+07	2.71977e+07	2.56978e+07	4.4814e+07	3.26224e+07	2.98251e+07
Tb927.10.2730	START domain containing protein, putative	10		1.13132	0.184357	30.272	30.5186	30.4099	30.7316	30.4428	30.556	1.29656e+09	1.53818e+09	1.42661e+09	1.78292e+09	1.45944e+09	1.57859e+09
Tb927.10.2760	ATPase family associated with various cellular activities (AAA), putative	7		1.17525	0.109142	25.2903	25.2272	25.198	25.3081	25.4167	25.6673	4.10344e+07	3.92763e+07	3.84908e+07	4.1544e+07	4.47901e+07	5.32869e+07
Tb927.10.2780	DNA-directed RNA polymerase III subunit C1	9		1.19791	0.172339	25.6592	25.647	25.5633	26.1446	25.6509	25.8128	5.29882e+07	5.25442e+07	4.95803e+07	7.41835e+07	5.26862e+07	5.89407e+07
Tb927.10.2790	Conserved oligomeric complex COG6, putative	8		0.855658	0.253617	25.3566	25.6969	25.668	25.1699	25.2564	25.6065	4.29621e+07	5.43909e+07	5.33118e+07	3.77486e+07	4.00801e+07	5.10888e+07
Tb927.10.280	cytochrome oxidase subunit VI	5		1.02682	0.617807	28.2521	28.3753	28.4922	28.372	28.3973	28.473	3.19692e+08	3.48189e+08	3.77584e+08	3.47388e+08	3.53533e+08	3.72585e+08
Tb927.10.2800	mitochondrial ribosomal protein s6	2		1.00648	0.890095	25.5784	25.6904	25.7041	25.7528	25.6505	25.5964	5.01042e+07	5.41463e+07	5.46642e+07	5.65414e+07	5.26706e+07	5.07321e+07
Tb927.10.2810	hypothetical protein, conserved	12		1.1346	0.1835	28.2482	28.5353	28.4887	28.701	28.4659	28.6573	3.18836e+08	3.89025e+08	3.76665e+08	4.36391e+08	3.70759e+08	4.23356e+08
Tb927.10.2880	Voltage-dependent calcium channel subunit, putative	20		1.20355	0.0515062	28.1807	28.3296	28.2719	28.6949	28.43	28.4477	3.04255e+08	3.37343e+08	3.24117e+08	4.3454e+08	3.61643e+08	3.66099e+08
Tb927.10.2890	enolase	33		0.985665	0.791685	35.5545	35.6908	35.6537	35.7484	35.5077	35.573	5.04636e+10	5.5461e+10	5.40558e+10	5.77199e+10	4.88536e+10	5.11137e+10
Tb927.10.290	proteasome alpha 2 subunit, putative	9		0.962924	0.630245	29.881	30.0521	30.067	30.1203	29.7964	29.9082	9.88713e+08	1.11323e+09	1.12478e+09	1.16715e+09	9.32395e+08	1.00754e+09
Tb927.10.2910	splicing factor PTSR1 interacting protein	2		0.909075	0.32013	27.101	27.3309	27.2499	27.2257	26.8786	27.1517	1.43954e+08	1.68824e+08	1.59597e+08	1.56942e+08	1.23385e+08	1.49098e+08
Tb927.10.2930	hypothetical protein, conserved	11		1.07344	0.146086	26.9173	27.0997	27.016	27.1614	27.0892	27.0938	1.26743e+08	1.4382e+08	1.35718e+08	1.50102e+08	1.42781e+08	1.43236e+08
Tb927.10.2940	Soluble NSF attachment protein, SNAP, putative	3		1.01285	0.857539	25.9572	26.2724	26.3185	26.3141	26.1053	26.2024	6.51475e+07	8.10535e+07	8.36851e+07	8.34312e+07	7.21921e+07	7.72179e+07
Tb927.10.2960	Translation factor GUF1, mitochondrial, putative	4		1.11315	0.378681	24.5276	25.0643	24.8707	25.1013	24.8727	24.9938	2.41856e+07	3.50849e+07	3.06772e+07	3.59961e+07	3.07196e+07	3.34098e+07
Tb927.10.2970	Inhibitor of F1-ATPase	5		1.10913	0.245374	26.3314	26.1491	26.4178	26.3214	26.5856	26.4403	8.44385e+07	7.44147e+07	8.96515e+07	8.38578e+07	1.00707e+08	9.10583e+07
Tb927.10.2980	proteasome regulatory non-ATPase subunit 11	12		0.943659	0.49556	29.7223	30.0452	29.9096	29.8503	29.7149	29.8738	8.85715e+08	1.1079e+09	1.0085e+09	9.67934e+08	8.81209e+08	9.83826e+08
Tb927.10.2990	nuclear cap binding complex subunit CBP110	13		1.23241	0.0881145	27.4946	27.7777	27.9252	28.1322	27.9399	28.056	1.89101e+08	2.30101e+08	2.54865e+08	2.94199e+08	2.57474e+08	2.79052e+08
Tb927.10.3000	Orofaciodigital syndrome 1-like protein, putative	3		1.26673	0.153098	23.6174	23.2714	23.835	24.1091	23.7198	23.9469	1.28689e+07	1.01252e+07	1.49638e+07	1.80957e+07	1.38156e+07	1.6171e+07
Tb927.10.3040	succinate dehydrogenase subunit	3		1.08482	0.585222	25.4017	25.0882	25.0831	25.5674	25.0427	25.2912	4.43282e+07	3.56708e+07	3.5545e+07	4.97231e+07	3.45631e+07	4.10582e+07
Tb927.10.3080	methionine biosynthetic protein, putative	10		1.14026	0.260585	27.8471	27.9534	27.89	28.324	27.874	28.0257	2.41445e+08	2.59907e+08	2.48731e+08	3.36036e+08	2.45983e+08	2.73268e+08
Tb927.10.310	pumillio/PUF RNA binding protein 3	9		0.83865	0.138509	28.0743	28.478	28.3585	28.1716	27.9746	28.0251	2.82627e+08	3.7389e+08	3.44167e+08	3.02332e+08	2.63751e+08	2.73141e+08
Tb927.10.3100	glycerol-3-phosphate acyltransferase, putative	3		0.84316	0.0899523	24.0184	24.3182	24.0764	23.9835	23.9177	23.7842	1.69922e+07	2.09179e+07	1.76901e+07	1.6586e+07	1.58471e+07	1.44468e+07
Tb927.10.3110	DNA primase large subunit, putative	6		1.12775	0.629006	29.1026	28.3908	28.3626	29.1819	28.8462	28.3604	5.76422e+08	3.51943e+08	3.45148e+08	6.09005e+08	4.82589e+08	3.44607e+08
Tb927.10.3120	cytochrome c oxidase assembly protein COX11, putative	3		1.04153	0.743397	26.3174	26.2266	26.0121	26.4402	26.0136	26.2638	8.36257e+07	7.85244e+07	6.76737e+07	9.10516e+07	6.77448e+07	8.0572e+07
Tb927.10.3150	N-acetyltransferase, putative	8		1.09735	0.365881	29.2113	29.2258	29.0857	29.5298	29.2045	29.1663	6.21547e+08	6.27814e+08	5.69715e+08	7.75083e+08	6.18631e+08	6.02447e+08
Tb927.10.3160	hypothetical protein, conserved	2		1.1802	0.113141	22.5253	22.8193	22.6907	23.0817	22.845	22.8265	6.03664e+06	7.40118e+06	6.77007e+06	8.8774e+06	7.53396e+06	7.43807e+06
Tb927.10.3170	GCN20-type ATP-binding cassette protein, putative	10		1.03192	0.542067	28.3802	28.5519	28.4749	28.5901	28.4283	28.5251	3.49372e+08	3.93521e+08	3.7308e+08	4.04103e+08	3.61219e+08	3.86277e+08
Tb927.10.3250	Mitochondrial SSU ribosomal protein, putative	3		0.972481	0.763077	25.946	25.8893	26.1845	26.0172	25.8133	26.0731	6.46429e+07	6.2154e+07	7.62665e+07	6.79118e+07	5.89644e+07	7.05992e+07
Tb927.10.3260	Long-chain-fatty-acid--CoA ligase 5 (EC 6.2.1.3) (Long-chain acyl-CoA synthetase 5) (LACS 5), putative	23		1.02404	0.695935	30.2324	30.4066	30.367	30.4596	30.2546	30.3928	1.26142e+09	1.42327e+09	1.38482e+09	1.47661e+09	1.28097e+09	1.40977e+09
Tb927.10.3280	60S ribosomal proteins L38, putative	3		0.839844	0.0901659	30.6964	30.8198	31.002	30.7024	30.4655	30.6016	1.74e+09	1.89531e+09	2.15041e+09	1.74721e+09	1.4826e+09	1.6293e+09
Tb927.10.330	hypothetical protein, conserved	5		1.04325	0.713914	25.4366	25.7012	25.4798	25.8284	25.4908	25.4669	4.5412e+07	5.45563e+07	4.67939e+07	5.95825e+07	4.71526e+07	4.63753e+07
Tb927.10.3310	Component of motile flagella 76b	7		1.50783	0.126106	23.0334	22.9855	23.02	24.0393	23.0723	23.5441	8.58497e+06	8.30445e+06	8.50559e+06	1.72404e+07	8.81971e+06	1.22312e+07
Tb927.10.3330	DDRGK domain containing protein, putative	3		0.80315	0.372799	23.3704	23.7054	23.3013	22.3385	23.5603	23.2996	1.08442e+07	1.36788e+07	1.03371e+07	5.30346e+06	1.23697e+07	1.03248e+07
Tb927.10.3340	CMGC/MAPK protein kinase, putative	9		1.08889	0.810436	27.0604	26.9623	27.0305	27.5981	27.0063	26.6603	1.39958e+08	1.30752e+08	1.37085e+08	2.03172e+08	1.3481e+08	1.06061e+08
Tb927.10.3370	60S acidic ribosomal protein P2, putative	7		1.12825	0.23625	31.6974	31.7542	31.707	32.0399	31.9589	31.6549	3.48242e+09	3.62223e+09	3.50555e+09	4.41543e+09	4.17438e+09	3.38113e+09
Tb927.10.3390	predicted TLD domain protein	3		1.3773	0.185939	23.291	23.0181	23.1971	24.0876	23.2849	23.3954	1.02637e+07	8.49454e+06	9.61685e+06	1.78277e+07	1.02198e+07	1.10334e+07
Tb927.10.340	mitochondrial structure specific endonuclease I (SSE-1), putative	3		1.09352	0.582741	24.1998	24.5916	24.4274	24.6701	24.1963	24.7114	1.92694e+07	2.52819e+07	2.25618e+07	2.66953e+07	1.92229e+07	2.74715e+07
Tb927.10.3430	hypothetical protein, conserved	4		0.993743	0.988381	25.342	25.8526	25.7433	25.5186	25.6342	25.7931	4.25297e+07	6.05889e+07	5.61683e+07	4.80681e+07	5.20776e+07	5.81446e+07
Tb927.10.3490	kinetoplastid-specific dual specificity phosphatase, putative	4		1.26059	0.0761345	23.2344	23.2246	22.9364	23.6037	23.5231	23.2696	9.86852e+06	9.80204e+06	8.027e+06	1.27476e+07	1.20551e+07	1.01125e+07
Tb927.10.3500	splicing factor u2af 65 kda subunit	13		1.11246	0.14052	28.5879	28.8393	28.6998	28.9427	28.7896	28.863	4.03484e+08	4.80285e+08	4.36005e+08	5.15951e+08	4.64029e+08	4.8822e+08
Tb927.10.3510	tRNA pseudouridine synthase D (TruD), putative	6		0.798533	0.233107	25.2588	25.5176	25.3692	24.9362	24.6337	25.4828	4.01463e+07	4.80354e+07	4.33408e+07	3.21028e+07	2.6031e+07	4.68913e+07
Tb927.10.3520	protease regulatory ATPase subunit 4	15		1.02213	0.575304	29.7441	29.8363	29.8018	29.8997	29.7514	29.8235	8.99205e+08	9.58554e+08	9.35912e+08	1.00162e+09	9.03754e+08	9.50123e+08
Tb927.10.3540	DNA-directed RNA polymerase I subunit RPA31	6		0.900601	0.269298	27.7983	28.0625	28.1165	27.8497	27.7414	27.9455	2.33409e+08	2.80317e+08	2.91005e+08	2.41881e+08	2.24379e+08	2.58481e+08
Tb927.10.3560	Protein arginine N-methyltransferase 1, prozyme	8		0.898115	0.188012	28.9022	29.0762	28.9691	28.9787	28.6812	28.8124	5.01693e+08	5.66004e+08	5.25495e+08	5.29017e+08	4.30435e+08	4.71419e+08
Tb927.10.3570	RNA editing exonuclease 2	20		1.18566	0.21309	29.4456	29.2041	29.1937	29.7917	29.3578	29.405	7.3117e+08	6.18437e+08	6.14018e+08	9.29356e+08	6.87989e+08	7.10845e+08
Tb927.10.3580	Mitochondrial SSU ribosomal protein, putative	3		0.926677	0.509429	25.585	25.9866	25.9489	25.8021	25.6286	25.7869	5.03335e+07	6.64868e+07	6.47734e+07	5.85055e+07	5.18782e+07	5.78951e+07
Tb927.10.3590	hypothetical protein, conserved	9		1.20239	0.127828	27.2001	27.4167	27.3308	27.7857	27.3722	27.5658	1.54186e+08	1.79159e+08	1.68804e+08	2.31387e+08	1.73727e+08	1.98665e+08
Tb927.10.3630	hypothetical protein, conserved	3		0.995139	0.939868	25.8435	26.0838	26.0258	26.0833	25.7845	26.0564	6.02104e+07	7.11227e+07	6.83206e+07	7.10986e+07	5.77979e+07	6.97867e+07
Tb927.10.3640	nuclear transmembrane protein, putative	3		0.90394	0.578381	25.214	24.5678	24.9474	24.8234	24.9314	24.5881	3.89203e+07	2.48677e+07	3.23534e+07	2.96888e+07	3.19969e+07	2.52204e+07
Tb927.10.3650	NADH-dependent fumarate reductase	25		1.0259	0.711997	28.8148	29.0305	29.004	29.0399	28.8582	29.0627	4.72208e+08	5.48352e+08	5.38352e+08	5.51944e+08	4.86629e+08	5.60721e+08
Tb927.10.3670	hypothetical protein, conserved	4		0.774139	0.0601048	24.5904	24.9783	24.7554	24.2972	24.3555	24.5748	2.52603e+07	3.30546e+07	2.83218e+07	2.06147e+07	2.14646e+07	2.49895e+07
Tb927.10.370	calcineurin B subunit, putative	4		1.02853	0.213651	24.7716	24.7448	24.7577	24.8495	24.7647	24.7804	2.86406e+07	2.8115e+07	2.83665e+07	3.02308e+07	2.85039e+07	2.88163e+07
Tb927.10.3710	proteasome activator protein PA26	9		0.989725	0.852187	30.8863	30.9068	30.9936	31.1078	30.7503	30.8627	1.98467e+09	2.01318e+09	2.138e+09	2.3141e+09	1.80619e+09	1.95251e+09
Tb927.10.3720	hypothetical protein, conserved	3		0.81511	0.37398	22.7381	23.2674	23.602	22.9795	22.8968	22.9728	6.99603e+06	1.00969e+07	1.27327e+07	8.27021e+06	7.8093e+06	8.23171e+06
Tb927.10.3740	hypothetical protein, conserved	2		1.05495	0.653113	23.2468	23.5332	23.3252	23.4178	23.2422	23.6612	9.95401e+06	1.2139e+07	1.05097e+07	1.12062e+07	9.92232e+06	1.32657e+07
Tb927.10.3760	vacuolar ATP synthase subunit d, putative	4		1.1828	0.33981	25.7046	25.7835	26.0006	26.3537	26.0964	25.7104	5.46852e+07	5.77586e+07	6.71349e+07	8.57522e+07	7.17486e+07	5.49042e+07
Tb927.10.3770	predicted TPR repeat protein	7		1.11114	0.437916	26.253	26.1904	26.0793	26.6123	26.13	26.1928	7.99704e+07	7.65781e+07	7.0902e+07	1.02591e+08	7.34356e+07	7.67028e+07
Tb927.10.3790	hypothetical protein, conserved	35		1.03979	0.46275	28.3853	28.4672	28.445	28.5688	28.3651	28.5258	3.50609e+08	3.71094e+08	3.6543e+08	3.98176e+08	3.4573e+08	3.86487e+08
Tb927.10.380	kinetoplast ribosomal PPR-repeat containing protein 5	4		1.28529	0.241404	25.7884	25.2804	25.5902	26.3049	25.6457	25.7491	5.79542e+07	4.07524e+07	5.05151e+07	8.28991e+07	5.2496e+07	5.63981e+07
Tb927.10.3810	Nucleoporin NUP65	7		0.955988	0.336982	26.6449	26.8203	26.8025	26.704	26.6629	26.7119	1.04934e+08	1.18495e+08	1.17049e+08	1.0932e+08	1.06248e+08	1.09925e+08
Tb927.10.3820	hypothetical protein, conserved	5		1.1642	0.129999	25.1378	25.1191	25.0274	25.5119	25.1559	25.253	3.69173e+07	3.64414e+07	3.4198e+07	4.78466e+07	3.7384e+07	3.99867e+07
Tb927.10.3860	SNF-7-like protein, putative	2		1.7794	0.0744238	22.0052	21.6425	21.506	23.0287	22.471	22.017	4.2094e+06	3.27377e+06	2.9781e+06	8.55726e+06	5.81354e+06	4.24396e+06
Tb927.10.3870	hypothetical protein, conserved	6		0.773657	0.148259	26.0314	26.3938	26.486	25.6749	25.8975	26.2155	6.85877e+07	8.8174e+07	9.3991e+07	5.35709e+07	6.25051e+07	7.79207e+07
Tb927.10.3880	hypothetical protein, conserved	5		1.1072	0.172667	25.3112	25.4618	25.5356	25.5786	25.4831	25.6893	4.16324e+07	4.6213e+07	4.86397e+07	5.01085e+07	4.69016e+07	5.41058e+07
Tb927.10.390	DUF2407 ubiquitin-like domain containing protein, putative	6		0.849426	0.109497	29.0591	29.3739	29.3201	29.0725	28.9058	29.081	5.59306e+08	6.95692e+08	6.70225e+08	5.64547e+08	5.02923e+08	5.67865e+08
Tb927.10.3920	hypothetical protein, conserved	10		1.16439	0.0627576	26.5439	26.726	26.6324	26.9809	26.7538	26.8226	9.7837e+07	1.11002e+08	1.04025e+08	1.32449e+08	1.13159e+08	1.18689e+08
Tb927.10.3940	40S ribosomal protein S3A, putative	11		1.04649	0.597558	33.4926	33.4818	33.5205	33.7592	33.4506	33.4602	1.20857e+10	1.1996e+10	1.23223e+10	1.4539e+10	1.17394e+10	1.18178e+10
Tb927.10.3950	hypothetical protein, conserved	11		1.08414	0.316733	28.0461	28.3172	28.3596	28.4168	28.2812	28.3905	2.77144e+08	3.34444e+08	3.44424e+08	3.5836e+08	3.26201e+08	3.51889e+08
Tb927.10.3970	hypothetical protein, conserved	4		1.19942	0.235483	24.4894	24.4372	24.3599	25.01	24.5259	24.4785	2.35534e+07	2.27153e+07	2.15315e+07	3.37884e+07	2.41568e+07	2.33759e+07
Tb927.10.4010	hypothetical protein, conserved	10		1.04211	0.396437	27.0829	26.9976	27.0322	27.1575	26.9843	27.1444	1.42156e+08	1.33996e+08	1.37247e+08	1.49699e+08	1.32765e+08	1.48345e+08
Tb927.10.4050	serine palmitoyltransferase, putative	6		0.960387	0.550498	25.8465	25.991	26.0182	25.7407	25.9573	25.977	6.03365e+07	6.66937e+07	6.79613e+07	5.60692e+07	6.51513e+07	6.60469e+07
Tb927.10.4060	Ankyrin repeats (3 copies), putative	9		1.53423	0.435708	27.6623	27.3491	27.3257	28.8787	27.3045	27.4779	2.12418e+08	1.70956e+08	1.68214e+08	4.93583e+08	1.65756e+08	1.86922e+08
Tb927.10.4070	hypothetical protein, conserved	2		1.22565	0.153503	23.0042	23.4794	23.3761	23.4073	23.643	23.7145	8.4133e+06	1.16954e+07	1.08867e+07	1.11246e+07	1.30997e+07	1.37651e+07
Tb927.10.4080	hypothetical protein, conserved	11		1.03465	0.643507	26.8505	26.8678	26.8058	27.0489	26.7551	26.8525	1.21002e+08	1.22462e+08	1.17315e+08	1.38844e+08	1.13261e+08	1.21175e+08
Tb927.10.4100	hypothetical protein, conserved	2		2.50009	0.179156	22.6143	20.2949	20.5767	23.5957	22.7927	21.6256	6.42089e+06	1.2864e+06	1.56386e+06	1.26771e+07	7.26601e+06	3.2356e+06
TB927.10.4110	60S ribosomal protein L30	5		0.868821	0.106221	30.2356	30.557	30.4186	30.2379	30.1746	30.2073	1.26421e+09	1.57966e+09	1.43524e+09	1.26624e+09	1.21191e+09	1.23962e+09
Tb927.10.4130	NADH-ubiquinone oxidoreductase B13 subunit	6		0.892966	0.207407	25.9898	26.0973	26.1194	26.1064	25.831	25.7586	6.66354e+07	7.17908e+07	7.2898e+07	7.22443e+07	5.96924e+07	5.67688e+07
Tb927.10.4180	TFIIF-stimulated CTD phosphatase, putative	5		0.980355	0.882474	27.4941	27.1048	27.0801	27.4794	27.1347	26.9698	1.89035e+08	1.4433e+08	1.41885e+08	1.87127e+08	1.47349e+08	1.31437e+08
Tb927.10.420	Exocyst complex component EXO99	3		0.996776	0.995443	23.1181	23.7407	23.5603	23.2494	23.3671	23.798	9.10429e+06	1.40168e+07	1.23695e+07	9.97178e+06	1.08192e+07	1.45851e+07
Tb927.10.4220	hypothetical protein, conserved	6		1.1751	0.217208	26.3857	26.2559	26.2426	26.8	26.3595	26.3837	8.76786e+07	8.01341e+07	7.93959e+07	1.16844e+08	8.60972e+07	8.75535e+07
Tb927.10.4250	ADP-ribosylation factor-like 2, arl2	4		0.954131	0.526776	26.723	26.8389	26.909	26.7438	26.6067	26.9075	1.1077e+08	1.20037e+08	1.26013e+08	1.12377e+08	1.0219e+08	1.25886e+08
Tb927.10.4270	coatomer subunit zeta, putative	2		1.13673	0.391398	24.0434	24.4469	24.432	24.689	24.5596	24.2246	1.72894e+07	2.28687e+07	2.26345e+07	2.7047e+07	2.4728e+07	1.96035e+07
Tb927.10.4280	ubiquinol-cytochrome c reductase complex 14 kda protein	4		0.819405	0.107489	28.0829	28.3471	28.2125	28.1265	27.7125	27.9239	2.84314e+08	3.41451e+08	3.11027e+08	2.93039e+08	2.19935e+08	2.54637e+08
Tb927.10.4290	hypothetical protein, conserved	5		1.14897	0.860211	26.0323	25.6232	25.9569	26.7759	25.6842	25.399	6.86277e+07	5.16841e+07	6.51355e+07	1.14912e+08	5.39162e+07	4.42447e+07
Tb927.10.430	peroxidase, putative	7		1.19336	0.0727353	27.9962	27.9527	27.9345	28.4101	28.0936	28.1239	2.67737e+08	2.59772e+08	2.56522e+08	3.56696e+08	2.86427e+08	2.92506e+08
Tb927.10.4310	prohibitin 2, putative	14		0.959729	0.57984	31.0446	31.26	31.2203	31.2317	30.9749	31.1377	2.21492e+09	2.57149e+09	2.50177e+09	2.52157e+09	2.11052e+09	2.36259e+09
Tb927.10.4450	stress-inducible protein STI1-like, putative	11		1.05499	0.374159	29.0432	29.2712	29.1905	29.3152	29.1693	29.2576	5.53194e+08	6.47923e+08	6.12671e+08	6.67966e+08	6.03719e+08	6.41845e+08
Tb927.10.4470	hypothetical protein, conserved	6		1.29533	0.075974	24.9322	24.8899	24.8015	25.5254	25.0823	25.0933	3.20132e+07	3.10898e+07	2.92407e+07	4.82949e+07	3.55244e+07	3.57962e+07
Tb927.10.450	Component of motile flagella 62	11		1.16098	0.344131	27.3774	27.375	27.3712	27.9143	27.4722	27.3145	1.74354e+08	1.74057e+08	1.736e+08	2.52949e+08	1.86185e+08	1.66909e+08
Tb927.10.4520	6-phosphofructo-2-kinase/fructose-2,6-bisphosphatas, putative	2		1.05331	0.560898	25.3462	25.2836	25.3537	25.5435	25.1932	25.4502	4.26535e+07	4.08431e+07	4.28782e+07	4.89056e+07	3.8363e+07	4.58436e+07
Tb927.10.4550	hypothetical protein, conserved	2		0.878667	0.624051	23.2569	24.1306	23.6804	23.6988	23.1693	23.7087	1.00238e+07	1.83667e+07	1.34438e+07	1.36155e+07	9.4329e+06	1.371e+07
Tb927.10.4560	elongation factor 2	57		0.988717	0.876903	35.9482	36.1823	36.1117	36.2422	35.9267	36.0155	6.62943e+10	7.79758e+10	7.42536e+10	8.12817e+10	6.53148e+10	6.94614e+10
Tb927.10.4590	mitochondrial inner membrane signal peptidase, putative	2		2.61554	0.0898521	23.6712	22.3382	22.6513	24.992	24.3636	23.4017	1.33576e+07	5.30244e+06	6.5873e+06	3.33679e+07	2.15859e+07	1.10817e+07
Tb927.10.4610	dolicholphosphate-mannose synthase, putative	3		1.11181	0.240101	26.6909	27.0309	26.959	27.0655	26.9594	27.1313	1.08336e+08	1.3712e+08	1.3046e+08	1.40448e+08	1.30489e+08	1.47008e+08
Tb927.10.4620	peptidyl-prolyl cis-trans isomerase, putative	4		0.897316	0.222185	27.0244	27.3426	27.2551	27.0544	26.9789	27.134	1.36503e+08	1.70188e+08	1.60177e+08	1.39378e+08	1.32267e+08	1.47283e+08
Tb927.10.4640	eukaryotic translation initiation factor 3 subunit l	12		0.994448	0.905817	30.8831	30.7492	30.7723	30.9446	30.6943	30.7323	1.98032e+09	1.80481e+09	1.83388e+09	2.06652e+09	1.73746e+09	1.78383e+09
Tb927.10.4660	Transcription factor S-II (TFIIS), central domain containing protein, putative	2		1.62348	0.0611212	25.7139	25.1327	25.0175	26.3092	25.9751	25.7156	5.50369e+07	3.67867e+07	3.39647e+07	8.31505e+07	6.59609e+07	5.51034e+07
Tb927.10.4690	dynein light chain, putative	3		1.23791	0.0861407	25.018	25.3253	25.1047	25.623	25.2775	25.4683	3.39756e+07	4.20397e+07	3.60809e+07	5.16749e+07	4.06697e+07	4.64204e+07
Tb927.10.470	choline dehydrogenase, putative	11		0.910651	0.0807064	28.5143	28.4608	28.4167	28.4135	28.2357	28.3336	3.834e+08	3.69449e+08	3.58332e+08	3.57531e+08	3.16087e+08	3.3828e+08
Tb927.10.4700	dolicholphosphate-mannose synthase, putative	2		1.16436	0.116755	25.567	25.7952	25.7336	25.7868	25.8851	26.0769	4.97105e+07	5.82283e+07	5.57938e+07	5.78886e+07	6.19735e+07	7.07811e+07
Tb927.10.4710	proteasome subunit beta type-2, putative	6		0.981872	0.810129	27.9819	28.1686	28.1324	28.3012	27.8917	27.985	2.65095e+08	3.01703e+08	2.94246e+08	3.30766e+08	2.49016e+08	2.65652e+08
Tb927.10.4740	nucleolar RNA-binding protein, putative	2		0.923387	0.442454	25.5874	25.96	25.9377	25.7767	25.6742	25.7168	5.0417e+07	6.52738e+07	6.42719e+07	5.74857e+07	5.35436e+07	5.51459e+07
Tb927.10.4760	Integral membrane protein DUF106, putative	5		1.02994	0.698327	27.7124	27.9938	28.1142	28.0329	27.9267	28.0152	2.19926e+08	2.67277e+08	2.90547e+08	2.74623e+08	2.55129e+08	2.71282e+08
Tb927.10.4770	phosphatidylinositol-4-phosphate 5-kinase, putative	3		1.07293	0.42951	24.4824	24.553	24.8537	24.8	24.6405	24.7758	2.34389e+07	2.46144e+07	3.03187e+07	2.92104e+07	2.6153e+07	2.87244e+07
Tb927.10.4790	hypothetical protein, conserved	2		1.04848	0.455003	24.7213	24.683	24.5958	24.8546	24.6105	24.7325	2.76608e+07	2.69352e+07	2.53561e+07	3.03367e+07	2.56154e+07	2.78763e+07
Tb927.10.4820	hypothetical protein, conserved	3		0.516511	0.088568	25.0824	25.3648	25.4259	23.2723	24.7135	24.649	3.55262e+07	4.3209e+07	4.50762e+07	1.01314e+07	2.75109e+07	2.63076e+07
Tb927.10.4830	hypothetical protein, conserved	3		1.51662	0.0509165	24.915	24.9923	24.893	25.9035	25.3888	25.2226	3.16351e+07	3.33766e+07	3.11558e+07	6.27654e+07	4.3933e+07	3.91516e+07
Tb927.10.4870	tRNA-dihydrouridine synthase 2, putative	5		1.04079	0.546932	25.2784	25.2836	25.5481	25.4181	25.4962	25.3833	4.06974e+07	4.08427e+07	4.90628e+07	4.4835e+07	4.73291e+07	4.3766e+07
Tb927.10.4880	hypothetical protein, conserved	2		0.893334	0.368612	28.0436	28.3598	28.223	27.7666	28.1072	28.2413	2.76672e+08	3.4448e+08	3.133e+08	2.28336e+08	2.89142e+08	3.173e+08
Tb927.10.4890	zinc-finger of a C2HC-type, putative	4		0.940981	0.464453	25.9603	26.2208	26.124	25.9465	25.9249	26.1694	6.5287e+07	7.82095e+07	7.31326e+07	6.4668e+07	6.37041e+07	7.54717e+07
Tb927.10.4900	TPR-repeat-containing chaperone protein DNAJ, putative	14		1.01014	0.808978	28.1178	28.2355	28.1899	28.2391	28.1099	28.2365	2.91265e+08	3.16036e+08	3.06203e+08	3.16825e+08	2.89691e+08	3.16254e+08
Tb927.10.4920	hypothetical protein, conserved	2		0.829394	0.394535	23.7885	23.1602	23.1757	23.466	23.0088	22.862	1.44892e+07	9.37408e+06	9.47522e+06	1.15872e+07	8.44019e+06	7.62341e+06
Tb927.10.4930	protein phosphatase 2C, putative	2		1.08825	0.712094	22.8293	23.0083	23.0819	22.6299	23.3615	23.2074	7.45254e+06	8.43723e+06	8.87853e+06	6.49063e+06	1.07776e+07	9.68587e+06
Tb927.10.4950	U2 small nuclear ribonucleoprotein 16.5K	3		0.725084	0.0823926	25.2754	25.6357	25.5177	24.9074	24.7436	25.3417	4.06121e+07	5.21347e+07	4.80402e+07	3.14686e+07	2.8091e+07	4.25228e+07
Tb927.10.4980	ubiquitin-like protein DSK2, putative	6		1.0185	0.817211	28.9399	29.1307	29.1226	29.2373	28.969	29.0612	5.14968e+08	5.87766e+08	5.8447e+08	6.32842e+08	5.25454e+08	5.60126e+08
Tb927.10.5010	Elongation factor G1, mitochondrial, putative	17		1.16358	0.121696	29.9524	29.9084	29.8567	30.3219	29.9799	30.05	1.03892e+09	1.00771e+09	9.72189e+08	1.34218e+09	1.05887e+09	1.1116e+09
Tb927.10.5030	ubiquitin/ribosomal protein S27a, putative	3		0.865638	0.206997	28.1681	28.4902	28.5318	28.3194	28.0759	28.1866	3.01608e+08	3.77043e+08	3.88074e+08	3.34964e+08	2.82936e+08	3.05497e+08
Tb927.10.5040	chaperone protein DnaJ, putative	4		0.78513	0.0671767	27.6239	27.8461	27.8447	27.1833	27.4704	27.5948	2.06839e+08	2.41273e+08	2.41033e+08	1.52398e+08	1.8596e+08	2.02711e+08
Tb927.10.5050	mitochondrial ATP synthase epsilon chain	3		0.824545	0.27	28.0256	28.605	28.6009	28.2642	28.0927	28.1064	2.73245e+08	4.08277e+08	4.07114e+08	3.22391e+08	2.86249e+08	2.8899e+08
Tb927.10.510	Present in the outer mitochondrial membrane proteome 19	4		0.903129	0.50986	26.2472	26.7315	26.6834	26.193	26.4413	26.6047	7.96521e+07	1.11423e+08	1.0777e+08	7.67172e+07	9.11249e+07	1.02053e+08
Tb927.10.5120	KREPA6	3		1.14469	0.123336	25.5408	25.5636	25.5206	25.9069	25.5764	25.7076	4.88156e+07	4.95923e+07	4.81368e+07	6.29147e+07	5.0035e+07	5.4799e+07
Tb927.10.5130	Protein C21orf2 homolog, putative	6		1.11348	0.196164	25.7895	25.8826	25.6565	26.0305	25.784	25.9768	5.79968e+07	6.18649e+07	5.2891e+07	6.85405e+07	5.77769e+07	6.60392e+07
Tb927.10.5140	Mitogen-activated protein kinase 6	12		1.15165	0.0992364	28.6636	28.8369	28.7899	29.1205	28.8693	28.9042	4.25215e+08	4.79477e+08	4.64124e+08	5.83643e+08	4.90372e+08	5.02379e+08
Tb927.10.5150	ZC3H31	5		1.23412	0.181654	25.2403	25.7642	25.7856	25.9256	25.7633	26.0597	3.96349e+07	5.69894e+07	5.78431e+07	6.37355e+07	5.69534e+07	6.99426e+07
Tb927.10.5170	XPC-binding domain containing protein, putative	3		1.68181	0.173321	22.9722	22.0232	22.2684	23.7739	23.0536	22.6218	8.22834e+06	4.26226e+06	5.05204e+06	1.43434e+07	8.70598e+06	6.45406e+06
Tb927.10.5200	hypothetical protein, conserved	4		0.998084	0.954821	24.6514	24.781	24.8853	24.5977	24.7325	24.9646	2.63515e+07	2.88295e+07	3.09898e+07	2.53892e+07	2.7875e+07	3.27413e+07
Tb927.10.5210	TFIIH basal transcription factor subunit	3		1.08679	0.896512	22.918	22.9725	22.8079	22.3303	23.0259	23.4829	7.92529e+06	8.23033e+06	7.34294e+06	5.27351e+06	8.54085e+06	1.17236e+07
Tb927.10.5220	hypothetical protein, conserved	4		0.855953	0.274387	26.2358	26.6077	26.5034	26.3857	25.9322	26.3392	7.90231e+07	1.02263e+08	9.51289e+07	8.7675e+07	6.40279e+07	8.48951e+07
Tb927.10.5240	cAMP binding protein, putative	10		1.24949	0.0643884	25.5097	25.4098	25.2833	25.8836	25.5194	25.7495	4.77743e+07	4.45777e+07	4.08352e+07	6.19087e+07	4.80947e+07	5.64123e+07
Tb927.10.5260	C2 domain containing protein, putative	8		0.990815	0.996962	25.7779	26.3644	26.0658	26.2715	25.9754	25.9587	5.75339e+07	8.63915e+07	7.02381e+07	8.10073e+07	6.59732e+07	6.5216e+07
Tb927.10.5280	pre-mRNA splicing factor ATP-dependent RNA helicase, putative	7		1.32281	0.053786	24.6659	24.6833	24.5863	25.3116	24.8478	24.9464	2.66177e+07	2.69404e+07	2.51895e+07	4.16429e+07	3.01949e+07	3.233e+07
Tb927.10.5300	eukaryotic translation initiation factor 6 (eIF-6), putative	8		0.991618	0.818728	29.4589	29.3823	29.5014	29.4364	29.3732	29.4964	7.37902e+08	6.9977e+08	7.5998e+08	7.26522e+08	6.9537e+08	7.57339e+08
Tb927.10.5310	AMP-activated kinase, alpha 1	10		1.06628	0.339394	27.0301	27.2922	27.2572	27.3175	27.2219	27.3292	1.37046e+08	1.6435e+08	1.60416e+08	1.67263e+08	1.56532e+08	1.68624e+08
Tb927.10.5330	40S ribosomal protein S18, putative	10		0.843678	0.0875649	32.0719	32.3538	32.3216	31.9828	31.9159	32.1214	4.51444e+09	5.48872e+09	5.36737e+09	4.24408e+09	4.05172e+09	4.67199e+09
Tb927.10.5360	40S ribosomal protein S10, putative	9		0.925545	0.281113	32.6983	32.8419	32.8618	32.6223	32.6008	32.8374	6.96878e+09	7.69854e+09	7.80504e+09	6.6114e+09	6.51347e+09	7.67431e+09
Tb927.10.5380	intraflagellar transport protein 122	22		0.995581	0.990044	27.9035	28.3341	28.2152	28.219	27.9491	28.2781	2.51066e+08	3.38385e+08	3.11612e+08	3.12439e+08	2.59137e+08	3.25505e+08
Tb927.10.5420	hypothetical protein, conserved	4		0.814506	0.438072	25.8528	26.0146	26.2095	24.5909	26.17	25.9978	6.05975e+07	6.77927e+07	7.75957e+07	2.52688e+07	7.55019e+07	6.70062e+07
Tb927.10.5430	Flagellar C1a complex subunit C1a-32, putative	2		1.10051	0.391149	25.8149	26.0262	26.1126	26.196	25.9036	26.2602	5.9029e+07	6.83406e+07	7.25547e+07	7.68758e+07	6.27724e+07	8.03709e+07
Tb927.10.5440	RNA editing endoribonuclease	6		1.53485	0.116346	24.0012	24.671	23.65	25.0082	24.8126	24.5022	1.67917e+07	2.67118e+07	1.31634e+07	3.37454e+07	2.94673e+07	2.37622e+07
Tb927.10.5450	ISWI complex protein	16		1.12844	0.176749	27.5699	27.7643	27.669	28.012	27.7246	27.7798	1.99231e+08	2.27978e+08	2.13409e+08	2.70674e+08	2.21782e+08	2.30444e+08
Tb927.10.5460	60S ribosomal protein L24, putative	2		1.08568	0.829498	28.5039	27.6526	27.9544	28.7422	27.9213	27.7227	3.8065e+08	2.10987e+08	2.60086e+08	4.49017e+08	2.54188e+08	2.21496e+08
Tb927.10.550	hypothetical protein, conserved	3		0.941203	0.533092	23.736	23.9027	23.857	24.006	23.5978	23.5947	1.39713e+07	1.56827e+07	1.51935e+07	1.68471e+07	1.26953e+07	1.26683e+07
Tb927.10.5500	NADH-ubiquinone oxidoreductase complex I subunit, putative	2		1.04205	0.773091	23.4089	23.2418	22.9997	23.5155	23.04	23.2629	1.11373e+07	9.91911e+06	8.38688e+06	1.19911e+07	8.62474e+06	1.00656e+07
Tb927.10.5560	GPI alpha-mannosyltransferase III	7		1.33358	0.0762968	25.7622	25.5772	25.8919	26.3807	25.8833	26.1874	5.69122e+07	5.0061e+07	6.22635e+07	8.73762e+07	6.18958e+07	7.64183e+07
Tb927.10.5590	protein phosphatase 2C, putative	4		1.19336	0.184376	24.6513	24.4338	24.5024	25.0068	24.5273	24.7874	2.63493e+07	2.26617e+07	2.37663e+07	3.37122e+07	2.41797e+07	2.89578e+07
Tb927.10.560	40S ribosomal proteins S11, putative	6		0.988946	0.921951	31.5442	31.8472	31.8296	31.7618	31.61	31.813	3.13141e+09	3.86337e+09	3.81642e+09	3.64119e+09	3.27761e+09	3.77289e+09
Tb927.10.5630	hypothetical protein, conserved	6		1.00904	0.961026	28.457	28.473	28.3551	28.6472	28.3186	28.3369	3.68479e+08	3.7258e+08	3.43356e+08	4.20409e+08	3.3476e+08	3.39054e+08
Tb927.10.5640	Gem-associated protein 2, putative	7		0.83893	0.580159	26.1282	27.0539	27.0712	26.4069	26.3908	26.8355	7.33427e+07	1.39328e+08	1.41011e+08	8.89743e+07	8.79853e+07	1.19755e+08
Tb927.10.5660	heat shock protein, putative	3		0.8167	0.0783549	25.1061	25.352	25.2781	25.1546	24.8506	24.843	3.61141e+07	4.28258e+07	4.06867e+07	3.73493e+07	3.02543e+07	3.00955e+07
Tb927.10.5670	N-acetyltransferase subunit Nat1, putative	29		0.951967	0.370766	30.5809	30.6015	30.6556	30.6626	30.42	30.533	1.60604e+09	1.62915e+09	1.69143e+09	1.69969e+09	1.43662e+09	1.55367e+09
Tb927.10.5750	Extradiol ring-cleavage dioxygenase, putative	4		1.13494	0.438233	25.2792	25.6588	25.6732	25.9159	25.3981	25.8274	4.07201e+07	5.29745e+07	5.35076e+07	6.33088e+07	4.42175e+07	5.95398e+07
Tb927.10.5760	adenylate kinase, putative	5		0.806959	0.0638882	27.4646	27.8079	27.7149	27.3592	27.2485	27.4647	1.85217e+08	2.34969e+08	2.20297e+08	1.72163e+08	1.59451e+08	1.8523e+08
Tb927.10.5770	Valosin-containing protein	38		0.966382	0.569411	31.9185	32.0523	32.0112	32.0771	31.821	31.9277	4.05912e+09	4.45357e+09	4.32841e+09	4.53067e+09	3.79369e+09	4.08505e+09
Tb927.10.5810	The ARF-like 2 binding protein BART, putative	12		0.939031	0.473949	29.3664	29.6776	29.6626	29.5038	29.416	29.5329	6.9212e+08	8.58688e+08	8.49856e+08	7.6125e+08	7.16296e+08	7.76752e+08
Tb927.10.5820	predicted RanGDP binding protein	9		0.797776	0.0911379	25.1577	25.3945	25.156	24.6953	24.8784	25.1358	3.74307e+07	4.41063e+07	3.73857e+07	2.71666e+07	3.08418e+07	3.68653e+07
Tb927.10.5830	hypothetical protein, conserved	8		0.872959	0.241065	26.5959	26.9862	26.9509	26.6012	26.6004	26.768	1.01428e+08	1.32936e+08	1.29723e+08	1.01805e+08	1.01745e+08	1.14283e+08
Tb927.10.5840	translation elongation factor 1-beta, putative	6		1.09418	0.524094	28.721	29.0883	28.9335	29.2785	28.7869	29.0487	4.42474e+08	5.70756e+08	5.12694e+08	6.51204e+08	4.63137e+08	5.55298e+08
Tb927.10.5850	N-terminal region of Chorein, a TM vesicle-mediated sorter, putative	9		0.881689	0.153622	28.7052	28.6423	28.5422	28.5636	28.2568	28.5108	4.37637e+08	4.18989e+08	3.90902e+08	3.96738e+08	3.20725e+08	3.82469e+08
Tb927.10.5860	hypothetical protein, conserved	3		1.10922	0.234417	27.2751	27.5831	27.4245	27.6413	27.4542	27.6443	1.62419e+08	2.01062e+08	1.8014e+08	2.09337e+08	1.83875e+08	2.09784e+08
Tb927.10.5870	Flagellum attachment zone protein 25	10		1.17653	0.0834545	27.787	27.7058	27.6163	28.1083	27.8617	27.8314	2.31582e+08	2.18916e+08	2.05744e+08	2.8936e+08	2.43903e+08	2.38824e+08
Tb927.10.5900	hypothetical protein, conserved	2		1.43875	0.222946	23.5421	22.644	23.1964	24.088	23.2056	23.6678	1.22147e+07	6.5543e+06	9.61167e+06	1.7833e+07	9.67337e+06	1.33263e+07
Tb927.10.5980	leucine-rich repeat protein (LRRP), putative	2		0.800067	0.072763	26.4603	26.2571	26.3932	25.8754	25.9656	26.2797	9.23303e+07	8.01975e+07	8.8136e+07	6.15552e+07	6.55261e+07	8.1467e+07
Tb927.10.600	Mitochondrial ribosomal protein L29	13		0.97366	0.683518	27.1412	26.964	27.036	27.1545	26.8914	26.9727	1.48016e+08	1.30912e+08	1.37613e+08	1.49384e+08	1.24485e+08	1.317e+08
Tb927.10.6010	Cohesin subunit SCC3, putative	10		1.08602	0.365814	26.6185	26.5949	26.7306	26.9443	26.5893	26.7492	1.03028e+08	1.0136e+08	1.11354e+08	1.29134e+08	1.00969e+08	1.12798e+08
Tb927.10.6020	hypothetical protein, conserved	6		1.10961	0.20471	27.8585	28.1216	28.0505	28.2729	28.0581	28.1543	2.43351e+08	2.92038e+08	2.77991e+08	3.24329e+08	2.79469e+08	2.98739e+08
Tb927.10.6060	universal minicircle sequence binding protein 2	6		0.813729	0.0716505	31.0377	31.4007	31.3553	30.9162	30.9793	31.0301	2.20429e+09	2.83499e+09	2.74713e+09	2.02625e+09	2.11696e+09	2.19281e+09
Tb927.10.6070	universal minicircle sequence binding protein 1	6		0.718945	0.12426	31.442	31.7244	31.7251	30.6326	31.3473	31.3847	2.91734e+09	3.54806e+09	3.54988e+09	1.66464e+09	2.73202e+09	2.80376e+09
Tb927.10.6080	proteasome subunit beta type-5, putative	7		1.09821	0.13223	28.8913	29.0759	29.1	29.2187	29.1135	29.1473	4.97892e+08	5.65854e+08	5.75386e+08	6.24732e+08	5.80806e+08	5.94565e+08
Tb927.10.6130	hypothetical protein, conserved	7		3.36239	0.055872	24.5841	24.3207	24.2453	26.9476	25.8148	24.9947	2.51504e+07	2.09541e+07	1.98866e+07	1.29432e+08	5.90244e+07	3.34312e+07
Tb927.10.6160	Sec34-like family, putative	10		0.970128	0.651657	25.3244	25.5942	25.4633	25.3707	25.4314	25.4596	4.20153e+07	5.06536e+07	4.62609e+07	4.33866e+07	4.52505e+07	4.61427e+07
Tb927.10.6170	hypothetical protein, conserved	9		1.05718	0.53975	26.6294	27.0402	26.9769	27.0557	26.9269	26.9338	1.03814e+08	1.38006e+08	1.32087e+08	1.39504e+08	1.27587e+08	1.28198e+08
Tb927.10.6180	FLA1-like protein	8		1.09548	0.206855	27.3887	27.6359	27.6181	27.7283	27.6006	27.718	1.75716e+08	2.08564e+08	2.06008e+08	2.22358e+08	2.03518e+08	2.20773e+08
Tb927.10.6220	5'-3' exoribonuclease D	15		0.907452	0.108529	27.8378	28.0522	27.967	27.853	27.8214	27.7692	2.39898e+08	2.7833e+08	2.62373e+08	2.42424e+08	2.37185e+08	2.2875e+08
Tb927.10.6230	MORN repeat containing protein	7		0.869694	0.13184	26.4085	26.4805	26.5502	26.0695	26.3604	26.3876	8.90768e+07	9.363e+07	9.82656e+07	7.04196e+07	8.61503e+07	8.77901e+07
Tb927.10.6260	ATP-dependent DEAD/H RNA helicase, putative	10		0.912475	0.168469	27.9252	27.8867	27.8842	27.922	27.6948	27.6696	2.54879e+08	2.48167e+08	2.47723e+08	2.54304e+08	2.17257e+08	2.13497e+08
Tb927.10.630	hypothetical protein, conserved	2		1.23532	0.629436	21.4467	21.0706	20.254	21.5037	21.7148	20.397	2.85824e+06	2.20226e+06	1.25045e+06	2.9734e+06	3.44195e+06	1.3807e+06
Tb927.10.6300	Mitochondrial ribosomal protein S5	4		0.946282	0.470653	26.8747	27.1199	27.0891	26.9678	26.8366	27.0449	1.23055e+08	1.45847e+08	1.42768e+08	1.31254e+08	1.19842e+08	1.38461e+08
Tb927.10.6310	major vault protein, putative	18		1.09467	0.0987411	28.3999	28.3414	28.3765	28.596	28.3975	28.5095	3.54171e+08	3.40107e+08	3.48477e+08	4.05744e+08	3.53587e+08	3.82144e+08
Tb927.10.6320	CBF/Mak21 family, putative	12		0.938061	0.39441	27.5373	27.7115	27.735	27.6366	27.4166	27.6501	1.94786e+08	2.19786e+08	2.23387e+08	2.08666e+08	1.79149e+08	2.1063e+08
Tb927.10.6330	kinetoplastid kinetochore protein 1	4		0.933453	0.668546	23.8171	23.4547	23.3025	23.6698	23.1629	23.4486	1.47794e+07	1.14963e+07	1.03456e+07	1.33451e+07	9.39153e+06	1.14477e+07
Tb927.10.6340	hypothetical protein, conserved	2		1.04077	0.788959	23.239	23.8346	23.427	23.845	23.4793	23.371	9.89994e+06	1.49601e+07	1.1278e+07	1.5068e+07	1.16946e+07	1.08488e+07
Tb927.10.6350	trypanin	8		0.769122	0.244897	28.0092	28.3242	28.3763	27.2394	28.032	28.1669	2.70148e+08	3.36067e+08	3.48442e+08	1.58447e+08	2.74453e+08	3.01348e+08
Tb927.10.6360	FAZ-tip-localizing protein required for cytokinesis	6		0.928877	0.31026	26.8734	27.0605	27.0712	26.8812	26.7889	27.0151	1.22943e+08	1.3997e+08	1.41005e+08	1.23605e+08	1.15951e+08	1.35633e+08
Tb927.10.6400	chaperonin HSP60, mitochondrial precursor	32		0.955815	0.497918	35.8861	36.0859	36.0665	36.0498	35.8433	35.9507	6.35048e+10	7.29347e+10	7.19588e+10	7.1132e+10	6.16478e+10	6.64104e+10
Tb927.10.6410	DNA mismatch repair protein MSH6	5		1.27235	0.170817	25.2249	25.2817	25.214	25.944	25.3915	25.3491	3.92148e+07	4.07893e+07	3.89208e+07	6.45556e+07	4.40167e+07	4.27416e+07
Tb927.10.6440	phosphomannomutase	5		0.873335	0.107542	28.0251	28.2433	28.2315	28.0365	27.8481	28.0314	2.73143e+08	3.17749e+08	3.15153e+08	2.75316e+08	2.41617e+08	2.74348e+08
Tb927.10.6480	hypothetical protein, conserved	2		1.46976	0.283109	24.9143	23.2945	23.942	25.1871	24.6519	24.3046	3.16203e+07	1.02883e+07	1.61165e+07	3.82001e+07	2.63609e+07	2.07218e+07
Tb927.10.6490	KIAA1430 homologue, putative	2		1.00434	0.954784	26.1078	26.3041	26.4005	26.4255	26.1584	26.2497	7.23171e+07	8.28563e+07	8.85806e+07	9.0127e+07	7.48946e+07	7.97892e+07
Tb927.10.6530	Dolichyl-P-Man:Man(5)GlcNAc(2)-PP-dolichyl alpha-1,3-mannosyltransferase	2		1.01539	0.777022	24.376	24.565	24.6376	24.6132	24.5078	24.534	2.17719e+07	2.48203e+07	2.61001e+07	2.56631e+07	2.3855e+07	2.42932e+07
Tb927.10.6540	kinetoplastid-specific phospho-protein phosphatase, putative	6		0.903764	0.674134	25.1875	25.5531	25.9999	25.3311	25.5414	25.5352	3.82101e+07	4.92309e+07	6.71027e+07	4.22119e+07	4.88329e+07	4.86263e+07
Tb927.10.6550	Poly(ADP-ribose) polymerase and DNA-Ligase Zn-finger region/Zinc-finger (CX5CX6HX5H) motif containing protein, putative	2		1.23472	0.541975	23.0671	22.9465	23.0937	23.7851	23.3874	22.6223	8.78779e+06	8.08304e+06	8.95177e+06	1.4455e+07	1.09723e+07	6.4565e+06
Tb927.10.6570	TPR repeat, putative	3		1.21618	0.384413	23.0827	23.1577	23.0237	23.797	22.976	23.214	8.88369e+06	9.35746e+06	8.52767e+06	1.45753e+07	8.25012e+06	9.73026e+06
Tb927.10.6610	chaperone protein DnaJ, putative	3		1.00188	0.952408	25.4039	25.6756	25.5973	25.5509	25.4967	25.6466	4.43946e+07	5.35966e+07	5.07634e+07	4.91588e+07	4.73463e+07	5.25292e+07
Tb927.10.6630	ATP-dependent RNA helicase DBP2A, putative	24		0.878705	0.141401	30.0165	30.2795	30.2527	30.0458	29.8874	30.0636	1.08608e+09	1.30328e+09	1.27925e+09	1.10835e+09	9.93158e+08	1.12213e+09
Tb927.10.6640	transmembrane emp24 domain-containing protein	8		1.1284	0.158618	28.8945	29.0646	29.0708	29.3421	29.0823	29.1214	4.99019e+08	5.61469e+08	5.63885e+08	6.80534e+08	5.68405e+08	5.84004e+08
Tb927.10.6650	G10 protein homologue, putative	2		1.40923	0.0912305	22.7612	23.2641	23.2469	23.6696	23.2926	23.8019	7.10906e+06	1.00739e+07	9.95453e+06	1.33433e+07	1.02747e+07	1.46251e+07
Tb927.10.6680	member of the NOL1/NOP2/sun family of proteins	13		1.2973	0.16003	26.6445	26.6195	26.5938	27.3602	26.8352	26.7027	1.04901e+08	1.03104e+08	1.01281e+08	1.72282e+08	1.19732e+08	1.09221e+08
Tb927.10.6700	Kinetochore interacting protein 3	4		1.06136	0.408266	25.3025	25.2737	25.4989	25.5688	25.3809	25.3856	4.13809e+07	4.05628e+07	4.74169e+07	4.97697e+07	4.36919e+07	4.38367e+07
Tb927.10.6730	Plasma-membrane choline transporter, putative	6		0.978478	0.708499	29.5772	29.6134	29.6685	29.7478	29.4584	29.5448	8.01001e+08	8.21313e+08	8.53327e+08	9.01513e+08	7.37668e+08	7.83179e+08
Tb927.10.6780	vacuolar protein sorting-associated protein 45, putative	6		0.925905	0.709754	26.4075	27.0156	27.0344	26.7041	26.6478	26.8485	8.90152e+07	1.35674e+08	1.37455e+08	1.09331e+08	1.05142e+08	1.20838e+08
Tb927.10.6800	developmentally regulated GTP-binding protein, putative	11		1.0368	0.576306	28.8394	29.0825	29.032	29.0805	28.9398	29.0961	4.80301e+08	5.68465e+08	5.48903e+08	5.67672e+08	5.14942e+08	5.73844e+08
Tb927.10.6810	guanylate kinase, putative	7		0.862299	0.185948	26.4119	26.7222	26.7379	26.3765	26.3002	26.5639	8.92813e+07	1.10707e+08	1.11917e+08	8.71195e+07	8.26314e+07	9.92051e+07
Tb927.10.6820	hypothetical protein, conserved	3		0.996576	0.949553	26.47	26.5476	26.3777	26.46	26.4208	26.5036	9.29553e+07	9.80925e+07	8.71952e+07	9.2309e+07	8.98361e+07	9.5145e+07
Tb927.10.6860	endonuclease v	5		0.803898	0.0838502	27.6241	27.8368	27.7608	27.6678	27.3245	27.2583	2.06859e+08	2.39721e+08	2.27422e+08	2.13222e+08	1.68074e+08	1.60533e+08
Tb927.10.6870	short-chain dehydrogenase, putative	6		0.861902	0.0920917	28.3302	28.5242	28.5911	28.3593	28.1661	28.2828	3.37465e+08	3.86043e+08	4.04359e+08	3.44344e+08	3.01199e+08	3.26568e+08
Tb927.10.6880	glyceraldehyde 3-phosphate dehydrogenase, cytosolic	12		0.999242	0.98905	31.7574	31.9722	31.9192	31.9729	31.7494	31.9224	3.63018e+09	4.21307e+09	4.06103e+09	4.21493e+09	3.61021e+09	4.07012e+09
Tb927.10.6910	Sterol methyltransferase, putative	7		1.11091	0.52175	28.8777	28.627	28.6225	29.19	28.6937	28.6491	4.93251e+08	4.14546e+08	4.13264e+08	6.12456e+08	4.34179e+08	4.20952e+08
Tb927.10.6920	hypothetical protein	7		1.01112	0.824945	27.7035	27.9368	27.862	27.8791	27.7814	27.8968	2.18574e+08	2.56934e+08	2.43949e+08	2.46864e+08	2.30691e+08	2.49902e+08
Tb927.10.6930	Cullin family/Cullin protein neddylation domain containing protein, putative	3		0.975128	0.805082	23.454	23.1951	23.1589	23.4879	23.05	23.1415	1.14906e+07	9.60318e+06	9.36511e+06	1.17641e+07	8.68444e+06	9.25284e+06
Tb927.10.6940	Dipeptidyl-peptidase 8-like, putative	16		1.16161	0.0963228	28.5952	28.5934	28.6427	29.0045	28.6839	28.7726	4.05532e+08	4.05012e+08	4.19105e+08	5.38558e+08	4.31249e+08	4.58565e+08
Tb927.10.6990	hypothetical protein, conserved	5		1.04242	0.418546	27.5787	27.457	27.5992	27.5578	27.5532	27.7027	2.00454e+08	1.84243e+08	2.03324e+08	1.97574e+08	1.96949e+08	2.18439e+08
Tb927.10.7020.1-p1	acid phosphatase, putative	16		1.03094	0.698342	28.7554	29.0139	29.0782	29.082	28.8813	29.0285	4.53155e+08	5.42062e+08	5.66764e+08	5.68259e+08	4.94469e+08	5.4758e+08
Tb927.10.7060	Nucleoporin NUP96	16		1.10818	0.280368	28.7517	28.6875	28.6294	29.01	28.6384	28.8436	4.51998e+08	4.32309e+08	4.1526e+08	5.40617e+08	4.17839e+08	4.81704e+08
Tb927.10.7080	ATP-dependent DEAD/H RNA helicase, putative	6		1.21987	0.0783	25.7696	26.0965	26.0966	26.2331	26.2081	26.3982	5.7205e+07	7.17492e+07	7.17572e+07	7.88772e+07	7.75221e+07	8.84433e+07
Tb927.10.7110	Myo-inositol 1-phosphate synthase	9		1.02619	0.690649	26.7913	27.0837	27.0272	27.0859	26.9744	26.967	1.1614e+08	1.42236e+08	1.36771e+08	1.42454e+08	1.31861e+08	1.31181e+08
Tb927.10.7120	hypothetical protein, conserved	4		1.0529	0.285196	25.9061	25.6988	25.8489	25.9119	25.8887	25.884	6.288e+07	5.44641e+07	6.04355e+07	6.31342e+07	6.21261e+07	6.19231e+07
Tb927.10.7130	hypothetical protein, conserved	4		1.20092	0.569472	24.5926	24.5498	24.3824	25.3217	24.3304	24.462	2.52991e+07	2.45595e+07	2.18698e+07	4.1935e+07	2.10952e+07	2.31097e+07
Tb927.10.7210	Flagellum attachment zone protein 17	2		0.933947	0.889655	23.175	22.2499	22.3095	22.828	22.4136	22.3443	9.47028e+06	4.9875e+06	5.19797e+06	7.44589e+06	5.58673e+06	5.32481e+06
Tb927.10.7270	hypothetical protein, conserved	2		1.08725	0.82292	24.1561	23.8706	24.2045	24.3137	23.5882	24.5496	1.8694e+07	1.53381e+07	1.93322e+07	2.08528e+07	1.26116e+07	2.45556e+07
Tb927.10.7290	Flagellar Member 2	16		1.01189	0.929896	28.9062	29.1743	29.1353	29.2958	28.9158	29.0435	5.03085e+08	6.05821e+08	5.89676e+08	6.59053e+08	5.06436e+08	5.53288e+08
Tb927.10.7300	hypothetical protein, conserved	2		1.14648	0.24945	25.9232	26.3916	26.2028	26.2823	26.3379	26.5165	6.36302e+07	8.8037e+07	7.7235e+07	8.16157e+07	8.4819e+07	9.59965e+07
Tb927.10.7310	terminal uridylyltransferase 3, putative	6		1.02125	0.821309	25.6914	25.9481	25.9455	25.9741	25.7124	25.9879	5.41868e+07	6.47357e+07	6.46204e+07	6.59161e+07	5.49791e+07	6.6548e+07
Tb927.10.7330	40S ribosomal protein S24E, putative	5		1.14465	0.322431	31.2515	31.0454	31.0694	31.5997	31.1708	31.1426	2.5565e+09	2.21618e+09	2.25336e+09	3.25441e+09	2.41737e+09	2.37061e+09
Tb927.10.7350	hypothetical protein, conserved	14		1.07385	0.100704	27.2299	27.2538	27.2576	27.4382	27.2802	27.3269	1.57406e+08	1.60039e+08	1.60453e+08	1.81854e+08	1.62988e+08	1.6835e+08
Tb927.10.7380	LSU ribosomal protein, mitochondrial, putative	2		0.70167	0.155078	24.8827	24.9856	25.1937	23.8551	24.5903	24.9093	3.09343e+07	3.32202e+07	3.83765e+07	1.51738e+07	2.52596e+07	3.15095e+07
Tb927.10.7390	PHF5-like protein, putative	2		1.62899	0.178469	22.7278	21.7103	22.0548	23.2646	23.0901	22.2522	6.94626e+06	3.43135e+06	4.35675e+06	1.00776e+07	8.9291e+06	4.99539e+06
Tb927.10.740	structural maintenance of chromosome 4, putative	15		1.20346	0.27914	26.9899	27.2746	27.092	27.7212	27.1273	27.2542	1.33282e+08	1.62356e+08	1.43057e+08	2.21271e+08	1.46598e+08	1.60082e+08
Tb927.10.7410	succinyl-CoA ligase [GDP-forming] beta-chain, putative	23		1.02815	0.746678	33.2363	33.3217	33.4043	33.5345	33.2316	33.3036	1.01183e+10	1.07355e+10	1.13684e+10	1.24421e+10	1.00856e+10	1.06017e+10
Tb927.10.7420	bromodomain factor 2 protein, putative	8		1.08962	0.153701	27.7238	27.9062	27.9105	28.0179	27.9007	27.9984	2.2166e+08	2.5153e+08	2.52291e+08	2.7178e+08	2.50577e+08	2.68144e+08
Tb927.10.7440	ATP-dependent RNA helicase MTR4	29		0.970791	0.583707	29.0176	29.1559	29.1446	29.1603	28.9572	29.0691	5.43443e+08	5.98135e+08	5.93452e+08	5.99964e+08	5.21192e+08	5.63196e+08
Tb927.10.7450	Ribosomal RNA processing protein 41A	4		0.982924	0.79985	25.943	26.1048	26.0859	26.2091	25.9227	25.9127	6.45096e+07	7.21677e+07	7.12267e+07	7.75758e+07	6.36078e+07	6.31702e+07
Tb927.10.7470	RBP15	2		0.883626	0.371049	26.2539	26.5402	26.5191	26.3142	25.9302	26.4944	8.00203e+07	9.75884e+07	9.61684e+07	8.34383e+07	6.39404e+07	9.45379e+07
Tb927.10.7490	cullin 2, putative	4		1.55931	0.0825778	28.836	27.967	28.2074	28.7795	29.2556	29.0027	4.79191e+08	2.62366e+08	3.0993e+08	4.6077e+08	6.4094e+08	5.37889e+08
Tb927.10.7500	fibrillarin	12		1.16941	0.112616	30.3252	30.2743	30.2965	30.7263	30.3795	30.4439	1.34524e+09	1.29858e+09	1.31875e+09	1.77642e+09	1.39684e+09	1.46062e+09
Tb927.10.7510	chromatin binding protein, putative	5		1.25002	0.0697726	24.993	24.8421	24.6599	25.3116	25.0026	25.1494	3.3393e+07	3.00759e+07	2.65079e+07	4.16425e+07	3.36144e+07	3.72162e+07
Tb927.10.7550.1	hypothetical protein, conserved	5		1.00444	0.984309	26.7871	27.1071	27.0158	27.0201	26.7503	27.1491	1.15806e+08	1.44559e+08	1.35699e+08	1.36103e+08	1.12888e+08	1.4883e+08
Tb927.10.7570	dihydrolipoamide acetyltransferase E2 subunit, putative	17		1.09647	0.268922	31.6	31.8674	31.8376	31.9778	31.7788	31.9535	3.25496e+09	3.9179e+09	3.8376e+09	4.22947e+09	3.68449e+09	4.15866e+09
Tb927.10.7580	Exportin-5, putative	8		1.00841	0.846333	26.0754	26.2551	26.3376	26.2216	26.2555	26.2395	7.07118e+07	8.00896e+07	8.48035e+07	7.82498e+07	8.01103e+07	7.92269e+07
Tb927.10.7590	hypothetical protein, conserved	4		1.08582	0.551572	24.4423	24.8339	24.4073	24.5194	24.5961	24.9305	2.27959e+07	2.99052e+07	2.22507e+07	2.4047e+07	2.5361e+07	3.19763e+07
Tb927.10.760	hypothetical protein, conserved	14		0.99493	0.946466	27.94	28.1718	28.0223	28.1358	27.9424	28.0371	2.57492e+08	3.02392e+08	2.72625e+08	2.94934e+08	2.57931e+08	2.75422e+08
Tb927.10.7600	Centrosomal protein POC5, putative	3		1.07851	0.595655	25.7852	26.0846	26.4168	26.1786	26.0478	26.4301	5.78252e+07	7.11627e+07	8.9589e+07	7.5951e+07	6.93716e+07	9.04152e+07
Tb927.10.7630	transportin2- like protein	6		0.908797	0.237966	26.7074	26.9101	26.9825	26.8032	26.6295	26.7615	1.09579e+08	1.26106e+08	1.32595e+08	1.17106e+08	1.03821e+08	1.13765e+08
Tb927.10.7670	Protein of unknown function (DUF2962), putative	2		0.863073	0.33327	23.5254	24.0257	23.5644	23.3785	23.4791	23.6616	1.20739e+07	1.70784e+07	1.24045e+07	1.09048e+07	1.16923e+07	1.32695e+07
Tb927.10.7680	GTPase activating protein, putative	13		0.59211	0.32704	28.3443	29.9363	28.5043	28.3837	28.2744	28.426	3.40784e+08	1.02734e+09	3.80753e+08	3.50216e+08	3.24662e+08	3.60649e+08
Tb927.10.7690	Component of motile flagella 4	24		1.06136	0.369196	28.3035	28.5643	28.5111	28.5827	28.4726	28.5913	3.3129e+08	3.96936e+08	3.82557e+08	4.02029e+08	3.72495e+08	4.04415e+08
Tb927.10.7700	ATP-binding cassette protein subfamily G	12		1.02187	0.77428	30.1649	30.3735	30.3659	30.393	30.1863	30.4172	1.20374e+09	1.39104e+09	1.38374e+09	1.40991e+09	1.22177e+09	1.43384e+09
Tb927.10.7710	40S ribosomal protein S8, putative	7		0.948883	0.486646	28.2265	28.4736	28.4125	28.2431	28.223	28.4222	3.14064e+08	3.72746e+08	3.5728e+08	3.17712e+08	3.13305e+08	3.59703e+08
Tb927.10.7730	Domain of unknown function (DUF4496), putative	7		1.00982	0.946552	25.5847	25.7627	25.8846	25.9154	25.531	25.8165	5.03235e+07	5.69289e+07	6.19494e+07	6.32847e+07	4.84848e+07	5.90936e+07
Tb927.10.7740	protein transport protein SEC23	8		1.05285	0.536664	28.0907	28.3316	28.3833	28.4662	28.228	28.3411	2.85856e+08	3.37798e+08	3.50131e+08	3.70833e+08	3.144e+08	3.40021e+08
Tb927.10.7750	hypothetical protein, conserved	4		1.01402	0.883331	25.7627	26.1533	26.0689	26.1809	25.858	26.0168	5.69305e+07	7.4635e+07	7.03903e+07	7.60766e+07	6.08185e+07	6.78926e+07
Tb927.10.7780	Mitogen-activated protein kinase KFR1	5		0.899596	0.318744	25.3824	25.5422	25.7167	25.5791	25.2856	25.3198	4.3738e+07	4.88625e+07	5.51433e+07	5.01288e+07	4.08987e+07	4.18821e+07
Tb927.10.7790	ubiquitin fusion degradation protein, putative	6		0.990433	0.968589	28.2128	27.4217	27.4129	28.0125	27.7073	27.3683	3.11094e+08	1.79784e+08	1.78689e+08	2.70773e+08	2.19138e+08	1.73251e+08
Tb927.10.7810	Pre-rRNA-processing protein ESF1, putative	12		0.933598	0.319648	27.9234	28.0672	28.1417	28.0072	27.8281	28.001	2.54552e+08	2.81228e+08	2.96139e+08	2.69784e+08	2.38277e+08	2.68618e+08
Tb927.10.7880	Sperm tail/Sperm tail C-terminal domain containing protein, putative	7		1.03065	0.746095	26.5803	26.7562	26.6617	26.6837	26.5449	26.8852	1.0034e+08	1.13352e+08	1.06163e+08	1.07796e+08	9.79094e+07	1.23953e+08
Tb927.10.7890	hypothetical protein, conserved	2		1.44899	0.0615811	21.7022	21.8179	21.3733	22.1014	21.9242	22.4571	3.41207e+06	3.69705e+06	2.71652e+06	4.49979e+06	3.97959e+06	5.75789e+06
Tb927.10.790	vesicle-associated membrane protein, putative	3		1.01141	0.895076	26.4726	26.7997	26.6858	26.7792	26.5058	26.7268	9.31176e+07	1.16818e+08	1.07951e+08	1.15169e+08	9.52858e+07	1.1106e+08
Tb927.10.7910	RNA editing complex protein, putative	2		0.97013	0.785308	25.8685	26.2163	26.2118	26.0231	26.0027	26.1612	6.12639e+07	7.79619e+07	7.77214e+07	6.81908e+07	6.72354e+07	7.50408e+07
Tb927.10.7920	hypothetical protein, conserved	2		1.05257	0.432965	25.7332	25.9477	26.0121	25.9707	25.9255	26.0312	5.57802e+07	6.47189e+07	6.76759e+07	6.57601e+07	6.37305e+07	6.85768e+07
Tb927.10.7930	2,3-bisphosphoglycerate-independent phosphoglycerate mutase	22		1.0027	0.957735	31.3256	31.5368	31.5278	31.5556	31.3648	31.4847	2.69124e+09	3.11539e+09	3.09613e+09	3.15636e+09	2.7654e+09	3.00505e+09
Tb927.10.7960	hypothetical protein, conserved	2		1.04682	0.355113	24.5975	24.7644	24.8096	24.8089	24.7669	24.802	2.5386e+07	2.8499e+07	2.94068e+07	2.93924e+07	2.85483e+07	2.9251e+07
Tb927.10.7990	replication factor C subunit 3, putative	9		1.09678	0.327341	27.8331	28.0996	28.0639	28.3008	28.0307	28.0637	2.39113e+08	2.87622e+08	2.80583e+08	3.30676e+08	2.74215e+08	2.8056e+08
Tb927.10.8000	hypothetical protein, conserved	12		1.26254	0.0532907	27.1409	27.012	27.1717	27.6584	27.3082	27.3458	1.47988e+08	1.35339e+08	1.51186e+08	2.11836e+08	1.66188e+08	1.70567e+08
Tb927.10.8020	prolyl endopeptidase	39		1.00879	0.904859	32.9037	33.1453	33.1146	33.1945	32.9529	33.0555	8.03503e+09	9.50029e+09	9.29994e+09	9.83003e+09	8.31424e+09	8.9269e+09
Tb927.10.8040	beta adaptin, putative	18		1.11798	0.218818	28.5396	28.6965	28.7523	28.9967	28.7262	28.7401	3.902e+08	4.35003e+08	4.52186e+08	5.3566e+08	4.44058e+08	4.48379e+08
Tb927.10.8060	SET domain containing protein, putative	11		1.02808	0.829433	28.1985	28.3971	28.3991	28.5957	28.1739	28.3219	3.08024e+08	3.53493e+08	3.53987e+08	4.05669e+08	3.02827e+08	3.35526e+08
Tb927.10.8070	ATPase, putative	6		0.841174	0.0561276	26.8221	26.9684	27.1074	26.7466	26.6381	26.7751	1.18648e+08	1.31307e+08	1.44592e+08	1.12595e+08	1.04442e+08	1.14845e+08
Tb927.10.8080	Uncharacterized conserved protein (DUF2042), putative	9		0.858015	0.202231	27.4882	27.8259	27.6879	27.239	27.4917	27.6044	1.88271e+08	2.37923e+08	2.16211e+08	1.58405e+08	1.88729e+08	2.0406e+08
Tb927.10.8090	hypothetical protein, conserved	6		1.11961	0.143232	25.4746	25.7096	25.6139	25.8767	25.6794	25.7335	4.66261e+07	5.48718e+07	5.13526e+07	6.16103e+07	5.37348e+07	5.57882e+07
Tb927.10.810	Pentatricopeptide repeat protein (PPR), putative	3		2.47608	0.249485	24.4326	23.5782	23.3975	26.1881	24.4204	23.8886	2.26442e+07	1.25239e+07	1.10497e+07	7.64558e+07	2.24533e+07	1.55301e+07
Tb927.10.8110	Protein of unknown function (DUF2453), putative	4		1.10173	0.310552	25.9298	26.1333	26.1379	26.2556	26.018	26.3376	6.3923e+07	7.36032e+07	7.38417e+07	8.01158e+07	6.79515e+07	8.4803e+07
Tb927.10.8140	EVE domain containing protein, putative	2		1.12956	0.199713	23.4249	23.6182	23.6243	23.5506	23.8561	23.7795	1.12618e+07	1.28758e+07	1.29304e+07	1.2287e+07	1.51847e+07	1.4399e+07
Tb927.10.8170	Nucleoporin NUP144	26		1.07461	0.498002	29.3726	29.3869	29.3904	29.7224	29.3203	29.3856	6.95079e+08	7.02e+08	7.0369e+08	8.85783e+08	6.70351e+08	7.01364e+08
Tb927.10.8180	hypothetical protein, conserved	7		1.03214	0.669737	25.7265	25.9039	25.9954	26.0344	25.9233	25.8091	5.55215e+07	6.2785e+07	6.68933e+07	6.87283e+07	6.36326e+07	5.87921e+07
Tb927.10.8190	T-complex protein 1, theta subunit, putative	22		0.923291	0.339866	32.1003	32.372	32.3112	32.2549	32.0311	32.1572	4.60409e+09	5.55832e+09	5.32886e+09	5.12487e+09	4.38857e+09	4.78952e+09
Tb927.10.820	hypothetical protein, conserved	2		1.14569	0.761817	23.7131	23.6204	23.6753	24.3939	23.7676	23.1875	1.37515e+07	1.28962e+07	1.33963e+07	2.2044e+07	1.4281e+07	9.55288e+06
Tb927.10.8200	Ribosomal protein L1p/L10e family, putative	10		0.946535	0.0869525	29.1964	29.1688	29.1981	29.109	29.048	29.1663	6.15186e+08	6.03522e+08	6.15875e+08	5.79012e+08	5.55025e+08	6.02458e+08
Tb927.10.8270	eukaryotic translation initiation factor 3 subunit c	19		1.00488	0.997234	30.8648	30.7262	30.7601	30.9804	30.7543	30.6178	1.95543e+09	1.7763e+09	1.81853e+09	2.11845e+09	1.81122e+09	1.64766e+09
Tb927.10.830	adenylate kinase, putative	8		0.929407	0.733246	28.7414	28.0458	28.2899	28.5407	28.134	28.1342	4.48758e+08	2.771e+08	3.28188e+08	3.90475e+08	2.94569e+08	2.94594e+08
Tb927.10.8320	cytochrome oxidase subunit IX, putative	2		0.973317	0.803836	26.3367	26.6174	26.6751	26.7197	26.3919	26.3979	8.47505e+07	1.02953e+08	1.07153e+08	1.10514e+08	8.80548e+07	8.84197e+07
Tb927.10.8330	S. cerevisiae PSP1 homologue, putative	2		1.01149	0.867754	24.644	24.7111	25.0481	24.8354	24.7125	24.9298	2.62172e+07	2.74644e+07	3.46917e+07	2.99359e+07	2.74927e+07	3.19597e+07
Tb927.10.8360.2	Poly(A)-specific ribonuclease PARN-2	3		1.09193	0.243301	24.6108	24.6197	24.3724	24.7621	24.6228	24.6069	2.56205e+07	2.57786e+07	2.17187e+07	2.84537e+07	2.58345e+07	2.55513e+07
Tb927.10.8380	hypothetical protein, conserved	2		1.3236	0.152168	25.1686	25.6074	25.6807	26.202	25.6569	25.8061	3.77135e+07	5.11203e+07	5.37858e+07	7.71964e+07	5.29039e+07	5.86704e+07
Tb927.10.8390	Concanavalin A-like lectin/glucanases superfamily/SPRY domain/HECT-domain (ubiquitin-transferase), putative	9		1.23713	0.16083	25.1572	25.5129	25.1935	25.8592	25.4881	25.4254	3.74179e+07	4.788e+07	3.83698e+07	6.08672e+07	4.70628e+07	4.50625e+07
Tb927.10.840	Flagellum attachment zone protein 6	9		0.985837	0.819071	25.5829	25.7186	25.5984	25.7953	25.4711	25.5556	5.02589e+07	5.52158e+07	5.08017e+07	5.82336e+07	4.65117e+07	4.93177e+07
Tb927.10.8410	hypothetical protein, conserved	3		0.977341	0.92114	26.5716	25.923	26.2245	26.4974	25.9591	26.1854	9.97338e+07	6.3621e+07	7.84087e+07	9.47385e+07	6.52342e+07	7.63125e+07
Tb927.10.8420	Phosphatidylinositol 3-kinase tor1	11		1.19714	0.0838105	25.8947	25.8063	25.8563	26.3178	25.985	26.0103	6.23836e+07	5.86788e+07	6.07479e+07	8.36473e+07	6.6413e+07	6.75913e+07
Tb927.10.8430	40S ribosomal protein S12, putative	6		0.947052	0.448106	32.4504	32.6609	32.5667	32.6076	32.3564	32.4753	5.86877e+09	6.7906e+09	6.3616e+09	6.54448e+09	5.49845e+09	5.97092e+09
Tb927.10.850	hook complex protein, conserved	18		1.27382	0.0666166	26.8149	27.0301	27.0385	27.5247	27.1307	27.2581	1.18055e+08	1.37044e+08	1.37846e+08	1.9309e+08	1.46945e+08	1.60506e+08
Tb927.10.8540	chaperone protein DnaJ, putative	9		1.01302	0.703384	27.7677	27.8641	27.8925	27.8878	27.8054	27.8884	2.28515e+08	2.44295e+08	2.49165e+08	2.48348e+08	2.3457e+08	2.48461e+08
Tb927.10.8590	flagellum transition zone component	3		0.967321	0.832701	27.5206	28.0164	27.8711	27.8476	27.6837	27.7724	1.92548e+08	2.71504e+08	2.45497e+08	2.4152e+08	2.15589e+08	2.29254e+08
Tb927.10.8610	hypothetical protein, conserved	5		2.12773	0.260044	27.0989	26.0608	26.0009	28.4695	27.0051	26.4437	1.43736e+08	6.99961e+07	6.71502e+07	3.71671e+08	1.34695e+08	9.12762e+07
Tb927.10.8620	hypothetical protein, conserved	2		0.578634	0.293799	22.4804	23.0723	22.8482	19.1057	22.3836	22.7019	5.85143e+06	8.81957e+06	7.55091e+06	564145	5.4717e+06	6.8225e+06
Tb927.10.8630	Sucrase/ferredoxin-like, putative	8		0.795753	0.060283	26.786	27.1412	27.1565	26.6791	26.6895	26.7546	1.15716e+08	1.48019e+08	1.49592e+08	1.07451e+08	1.08228e+08	1.13227e+08
Tb927.10.8660	Fis1 C-terminal tetratricopeptide repeat, putative	6		1.13211	0.15558	26.2229	26.5263	26.2939	26.6278	26.4554	26.5092	7.83213e+07	9.66492e+07	8.22695e+07	1.03699e+08	9.20153e+07	9.55109e+07
Tb927.10.870	Furrow 1 protein	7		1.01974	0.785269	25.8878	25.9677	25.9438	26.0055	25.8015	26.065	6.20858e+07	6.56212e+07	6.45446e+07	6.73635e+07	5.84821e+07	7.02016e+07
Tb927.10.8710	centrin-3	5		1.02536	0.704254	25.387	25.4753	25.6087	25.5786	25.4037	25.598	4.38788e+07	4.66472e+07	5.11679e+07	5.011e+07	4.43884e+07	5.07893e+07
Tb927.10.8730	ABC1 family, putative	9		0.897213	0.1569	28.7342	28.7649	28.8991	28.7924	28.5603	28.5693	4.46526e+08	4.56146e+08	5.00613e+08	4.64912e+08	3.95831e+08	3.98302e+08
Tb927.10.8780	AAA domain containing protein, putative	32		1.11267	0.113457	28.4557	28.6378	28.5964	28.8149	28.6336	28.7039	3.6814e+08	4.17672e+08	4.05848e+08	4.72225e+08	4.16448e+08	4.37256e+08
Tb927.10.880	thymidine kinase	3		1.16093	0.443335	21.7586	22.0945	22.3115	22.611	21.9769	22.2027	3.54811e+06	4.47813e+06	5.20519e+06	6.40603e+06	4.12764e+06	4.82705e+06
Tb927.10.8820	hook complex protein, conserved	8		1.03277	0.669088	26.3005	26.541	26.4016	26.4108	26.3681	26.603	8.26473e+07	9.76452e+07	8.86509e+07	8.92181e+07	8.66116e+07	1.01927e+08
Tb927.10.8830	Flagellum attachment zone protein 5	3		1.08288	0.521719	26.1817	25.9122	26.1022	26.421	25.9796	26.1173	7.61136e+07	6.31461e+07	7.20371e+07	8.98487e+07	6.61659e+07	7.27944e+07
Tb927.10.8850	A distinct subfamily of CDD/CDA-like deaminases, putative	5		0.987631	0.800739	25.9646	26.1298	26.1452	26.0504	26.0678	26.0744	6.54844e+07	7.3429e+07	7.42162e+07	6.94953e+07	7.03378e+07	7.06602e+07
Tb927.10.8870	Myosin-like coiled-coil protein, putative	5		1.11975	0.288151	25.6841	25.6853	25.7661	26.1085	25.7578	25.7285	5.39114e+07	5.39565e+07	5.70659e+07	7.2353e+07	5.67369e+07	5.5595e+07
Tb927.10.8880	RNA interference factor 4	10		0.976198	0.742963	27.2951	27.2816	27.28	27.5108	27.1028	27.0989	1.64684e+08	1.63142e+08	1.62962e+08	1.91235e+08	1.44129e+08	1.43743e+08
Tb927.10.8890	kinetoplast DNA-associated protein, putative	3		0.80943	0.0988055	26.1143	26.5436	26.386	25.9967	25.9881	26.1688	7.26428e+07	9.78161e+07	8.76927e+07	6.69577e+07	6.6558e+07	7.54399e+07
Tb927.10.890	kinesin, putative	6		0.769018	0.102444	25.7377	25.8647	25.9772	25.2612	25.3141	25.8114	5.59523e+07	6.10996e+07	6.60574e+07	4.02129e+07	4.17166e+07	5.88849e+07
Tb927.10.8900	choline/ethanolamine phosphotransferase (CEPT)	4		0.915092	0.398125	26.8151	27.0298	27.1639	26.9575	26.7044	26.9689	1.18071e+08	1.37024e+08	1.50363e+08	1.30319e+08	1.09352e+08	1.3136e+08
Tb927.10.8910	Nucleoporin NUP181	18		1.0901	0.423896	28.1602	28.1561	27.888	28.3656	28.0054	28.2008	2.99963e+08	2.9912e+08	2.48389e+08	3.45868e+08	2.6944e+08	3.08521e+08
Tb927.10.8920	ras-like small GTPase, putative	4		0.974947	0.581043	26.7308	26.893	26.8753	26.7704	26.7668	26.8557	1.11373e+08	1.24626e+08	1.23101e+08	1.14473e+08	1.14188e+08	1.21442e+08
Tb927.10.8930	paraflagellar rod component, putative	16		1.06299	0.41097	28.8504	29.0093	29.1075	29.1506	28.9544	29.1302	4.83992e+08	5.40343e+08	5.78395e+08	5.95946e+08	5.2017e+08	5.87564e+08
Tb927.10.8940	flagellum targeting protein kharon1, putative	22		0.91965	0.118072	33.2121	33.3777	33.3782	33.2358	33.1581	33.2167	9.95064e+09	1.11604e+10	1.11644e+10	1.01151e+10	9.58476e+09	9.98229e+09
Tb927.10.8950	kinetoplast-associated protein 4 isoform 1	5		1.1794	0.0627463	27.9973	28.203	28.2967	28.4743	28.3908	28.3596	2.67938e+08	3.08989e+08	3.29733e+08	3.7293e+08	3.51961e+08	3.44422e+08
Tb927.10.8980	hypothetical protein, conserved	6		1.09214	0.28942	30.8869	31.2333	31.161	31.2276	31.1747	31.281	1.98562e+09	2.52441e+09	2.40105e+09	2.51454e+09	2.42398e+09	2.60931e+09
Tb927.10.9000	Mitochondrial processome subunit 2	4		0.933225	0.405241	24.7391	24.9528	24.7362	24.7153	24.5651	24.8458	2.80035e+07	3.24734e+07	2.79477e+07	2.75445e+07	2.48216e+07	3.01541e+07
Tb927.10.9020	Gcd10p family, putative	8		1.04993	0.689064	26.5919	26.5175	26.7763	26.8496	26.4423	26.785	1.01149e+08	9.60641e+07	1.14942e+08	1.20928e+08	9.11827e+07	1.15631e+08
Tb927.10.9025	hypothetical protein	2		1.08524	0.178805	29.261	29.1649	29.0231	29.2381	29.2492	29.324	6.43338e+08	6.01876e+08	5.45518e+08	6.33224e+08	6.38086e+08	6.72069e+08
Tb927.10.9040	hypothetical protein, conserved	2		1.04372	0.549539	23.5792	23.5071	23.793	23.6805	23.6096	23.7846	1.25326e+07	1.19219e+07	1.45352e+07	1.34439e+07	1.28e+07	1.44505e+07
Tb927.10.9050	pseudouridine synthase TruD, putative	14		1.04622	0.237508	27.6369	27.656	27.625	27.7641	27.6151	27.7302	2.087e+08	2.11489e+08	2.06999e+08	2.27946e+08	2.05573e+08	2.22656e+08
Tb927.10.9070	hypothetical protein, conserved	3		1.04539	0.485473	24.7552	24.7614	24.6733	24.9378	24.7286	24.7057	2.83183e+07	2.84389e+07	2.67546e+07	3.21395e+07	2.78001e+07	2.73625e+07
Tb927.10.9090	Cullin binding, putative	2		0.927264	0.37064	23.8354	24.145	24.0897	23.9613	23.8414	23.956	1.49684e+07	1.85513e+07	1.78541e+07	1.63335e+07	1.50308e+07	1.62727e+07
Tb927.10.9100	hypothetical protein, conserved	2		1.05398	0.668351	24.5121	24.8192	24.9943	24.9647	24.643	24.9628	2.39262e+07	2.96019e+07	3.34218e+07	3.2743e+07	2.61989e+07	3.27012e+07
Tb927.10.9130	pre-mRNA splicing factor ATP-dependent RNA helicase, putative	5		0.844887	0.175491	25.5924	25.711	25.8846	25.3926	25.3195	25.7278	5.05918e+07	5.49276e+07	6.19495e+07	4.40476e+07	4.18729e+07	5.55717e+07
Tb927.10.9140	FAD dependent oxidoreductase, putative	5		1.22359	0.104485	25.7891	25.6542	25.8994	26.2665	25.8634	26.0686	5.79837e+07	5.2807e+07	6.25908e+07	8.07239e+07	6.10444e+07	7.03793e+07
Tb927.10.9150	hypothetical protein, conserved	5		1.08578	0.302761	25.4891	25.5962	25.2971	25.4906	25.6797	25.5778	4.70963e+07	5.07238e+07	4.12266e+07	4.71437e+07	5.37478e+07	5.00828e+07
Tb927.10.9190.2	isoleucyl-tRNA synthetase, putative	43		0.984809	0.772369	31.8545	31.9677	31.9899	32.0288	31.8068	31.9052	3.88289e+09	4.19985e+09	4.26505e+09	4.38161e+09	3.75667e+09	4.02193e+09
Tb927.10.920	Ribosomal protein L1p/L10e family, putative	14		0.880751	0.187454	27.6038	27.8856	27.8692	27.6943	27.4723	27.65	2.03971e+08	2.47975e+08	2.45172e+08	2.17179e+08	1.86201e+08	2.10608e+08
Tb927.10.9200	Nuclease-related domain containing protein, putative	3		1.18393	0.183797	24.7191	24.5229	24.3397	24.9203	24.5671	24.8272	2.76183e+07	2.41062e+07	2.12312e+07	3.17521e+07	2.48563e+07	2.97663e+07
Tb927.10.9240	Tir chaperone protein (CesT) family, putative	4		1.76828	0.0528214	24.0073	23.0218	23.9196	24.6468	24.5574	24.3896	1.68623e+07	8.51644e+06	1.58677e+07	2.62671e+07	2.46891e+07	2.19791e+07
Tb927.10.9250	adenylyl cyclase-associated protein, putative	9		1.17121	0.130682	29.2599	29.3986	29.259	29.7383	29.3899	29.4536	6.42847e+08	7.07737e+08	6.4246e+08	8.95589e+08	7.03466e+08	7.35225e+08
Tb927.10.9260	hypothetical protein, conserved	3		0.975058	0.95183	24.2047	24.8224	24.7595	24.5751	24.4914	24.6808	1.93351e+07	2.96682e+07	2.84029e+07	2.49951e+07	2.35857e+07	2.68948e+07
Tb927.10.9280	hypothetical protein, conserved	5		1.13487	0.201221	25.133	25.4034	25.5458	25.5701	25.599	25.4885	3.67949e+07	4.43809e+07	4.89846e+07	4.98156e+07	5.08231e+07	4.7077e+07
Tb927.10.9300	adiponectin receptor protein 1	3		1.61928	0.215346	24.624	24.363	24.4864	25.8487	24.8174	24.5682	2.58556e+07	2.15773e+07	2.35042e+07	6.04262e+07	2.95648e+07	2.48758e+07
Tb927.10.9350	hypothetical protein, conserved	3		1.29366	0.150712	25.8276	25.1473	25.6818	26.0922	25.9436	25.8061	5.95503e+07	3.71613e+07	5.38271e+07	7.15385e+07	6.45369e+07	5.86703e+07
Tb927.10.9380	SEP domain/UBX domain containing protein, putative	3		0.702839	0.0915594	24.0607	24.4387	24.1551	23.3354	23.6602	24.0666	1.74976e+07	2.27401e+07	1.86819e+07	1.05844e+07	1.32563e+07	1.75702e+07
Tb927.10.9390	Macrocin-O-methyltransferase (TylF), putative	2		1.08202	0.471782	23.689	23.3901	23.1129	23.4968	23.5489	23.5445	1.3524e+07	1.09932e+07	9.07141e+06	1.18368e+07	1.22721e+07	1.22346e+07
Tb927.10.940	hypothetical protein, conserved	2		1.1051	0.467428	23.8483	23.6391	23.737	24.173	23.7022	23.7405	1.51031e+07	1.30643e+07	1.39813e+07	1.8915e+07	1.36483e+07	1.40154e+07
Tb927.10.9410	Selenophosphate synthetase 2	5		1.37413	0.0578578	25.8544	25.6313	25.5118	26.3893	26.0333	25.9305	6.06646e+07	5.1976e+07	4.78421e+07	8.78969e+07	6.86743e+07	6.39535e+07
Tb927.10.9430	phosphoribosylpyrophosphate synthetase, putative	7		0.971105	0.836297	29.4653	29.9169	29.793	29.6613	29.5999	29.8153	7.41207e+08	1.01365e+09	9.30193e+08	8.49076e+08	8.13685e+08	9.44705e+08
Tb927.10.9560	oxidoreductase, putative	2		0.788225	0.109644	22.6819	22.8307	22.796	22.7168	22.1271	22.3778	6.72862e+06	7.4599e+06	7.28239e+06	6.89358e+06	4.58043e+06	5.44991e+06
Tb927.10.9570	paraflagellar rod component, putative	40		1.14592	0.109285	31.4175	31.577	31.5689	31.8561	31.5829	31.7064	2.86811e+09	3.20341e+09	3.18547e+09	3.88719e+09	3.21662e+09	3.50399e+09
Tb927.10.960	U4/U6-specific protein PRP4	7		1.07517	0.354891	25.8097	26.0576	26.0946	26.1753	26.1131	25.9979	5.88143e+07	6.98448e+07	7.16556e+07	7.57808e+07	7.25816e+07	6.7011e+07
Tb927.10.9640	hypothetical protein, conserved	5		1.01337	0.838737	24.431	24.7947	24.4003	24.5885	24.639	24.486	2.26181e+07	2.91031e+07	2.2142e+07	2.52275e+07	2.61258e+07	2.34977e+07
Tb927.10.9650	Nucleoporin NUP152	23		1.04535	0.337703	28.6492	28.6754	28.7784	28.8492	28.7055	28.7395	4.20982e+08	4.28716e+08	4.60414e+08	4.83592e+08	4.37748e+08	4.48188e+08
Tb927.10.9660	Splicing factor CRN, putative	6		1.09116	0.455719	25.0752	25.4103	25.4843	25.5575	25.2628	25.5407	3.53509e+07	4.45916e+07	4.69409e+07	4.93809e+07	4.02588e+07	4.88105e+07
Tb927.10.9670	ADP-ribosylation factor family, putative	3		0.960093	0.709703	23.1834	23.0454	22.8648	23.6027	22.6317	22.4048	9.52584e+06	8.65677e+06	7.63812e+06	1.27387e+07	6.49865e+06	5.55292e+06
Tb927.10.9680	SET domain containing protein, putative	6		1.21949	0.247994	26.6736	25.9724	26.2991	26.8285	26.5124	26.5258	1.07039e+08	6.58389e+07	8.25681e+07	1.19176e+08	9.57223e+07	9.66165e+07
Tb927.10.970	Tetratricopeptide repeat, putative	6		1.1145	0.496305	27.2278	27.412	27.4522	27.8417	27.3824	27.2835	1.57175e+08	1.78578e+08	1.83627e+08	2.40537e+08	1.74953e+08	1.63362e+08
Tb927.10.9720	RNA-editing-associated protein 1	5		1.17806	0.106403	23.7529	24.0267	23.9997	24.1741	24.0309	24.2876	1.41365e+07	1.70908e+07	1.67735e+07	1.89291e+07	1.71401e+07	2.04785e+07
Tb927.10.9740	Regulatory particle triple-A ATPase subunit 6	15		0.99509	0.943284	29.667	29.6775	29.8663	29.7949	29.6056	29.79	8.52425e+08	8.5867e+08	9.78725e+08	9.3146e+08	8.16893e+08	9.2826e+08
Tb927.10.9750	ubiquitin-protein ligase, putative	4		1.06345	0.713131	26.488	26.4509	26.3786	26.8165	26.4845	26.2233	9.41183e+07	9.1731e+07	8.72486e+07	1.18188e+08	9.38929e+07	7.83437e+07
Tb927.10.9760	alternative oxidase	3		1.21995	0.130527	24.8162	24.5711	24.5355	25.0635	25.0223	24.6849	2.95417e+07	2.49254e+07	2.43179e+07	3.50651e+07	3.40781e+07	2.69708e+07
Tb927.10.9770	gamma-tubulin complex component 2	10		1.1337	0.15956	26.5239	26.5743	26.5562	26.9214	26.5934	26.662	9.64915e+07	9.99194e+07	9.86754e+07	1.27098e+08	1.01256e+08	1.06186e+08
Tb927.10.9780	ATP-dependent DEAD/H RNA helicase, putative	13		1.14043	0.186306	27.9308	28.0654	28.0438	28.3901	28.0213	28.1771	2.55857e+08	2.80893e+08	2.76706e+08	3.51769e+08	2.72429e+08	3.03495e+08
Tb927.10.9810	hypothetical protein, conserved	8		0.904934	0.252778	26.6631	26.8209	26.8958	26.5073	26.6336	26.8011	1.06264e+08	1.1855e+08	1.24869e+08	9.53879e+07	1.04117e+08	1.16935e+08
Tb927.10.9820	mitochondrial intermediate peptidase	16		1.02143	0.69382	29.1277	29.3116	29.2078	29.3438	29.1802	29.2155	5.86566e+08	6.66288e+08	6.20034e+08	6.81356e+08	6.08291e+08	6.2338e+08
Tb927.10.9830	Mitochondrial ATP synthase subunit, putative	4		1.00505	0.941359	28.736	28.6307	28.6091	28.9841	28.5731	28.3756	4.47092e+08	4.15631e+08	4.09459e+08	5.30991e+08	3.9935e+08	3.48258e+08
Tb927.10.9840	chaperone protein DnaJ, putative	5		1.05544	0.316565	27.7094	27.845	27.8467	27.8948	27.7836	27.9553	2.19467e+08	2.41095e+08	2.41378e+08	2.49565e+08	2.31051e+08	2.60242e+08
Tb927.10.9860	Mitochondrial N(5)-glutamine methyltransferase MTQ1, putative	1		1.16695	0.147832	22.8527	22.9828	22.8077	22.9069	23.2841	23.1016	7.57425e+06	8.28907e+06	7.34184e+06	7.86454e+06	1.02143e+07	9.00036e+06
Tb927.10.9870	Component of motile flagella 12	6		1.00043	0.970282	27.0336	27.3284	27.3137	27.3441	27.1934	27.1516	1.37379e+08	1.68532e+08	1.66818e+08	1.70369e+08	1.53468e+08	1.49093e+08
Tb927.10.9880	60S ribosomal protein L18, putative	6		1.81618	0.103088	29.0083	28.7805	28.5414	30.2081	29.4772	29.0081	5.39955e+08	4.61091e+08	3.90682e+08	1.24038e+09	7.47347e+08	5.39901e+08
Tb927.10.9890	hypothetical protein, conserved	14		0.976995	0.657635	28.4938	28.5423	28.6354	28.5273	28.416	28.6235	3.77984e+08	3.90916e+08	4.16973e+08	3.86872e+08	3.58165e+08	4.13556e+08
Tb927.10.9900	ABC1 protein, putative	8		1.03207	0.764392	27.1077	27.3482	27.3915	27.3609	27.1325	27.4847	1.44624e+08	1.70856e+08	1.76062e+08	1.72365e+08	1.47132e+08	1.87808e+08
Tb927.10.9910	PSP1 C-terminal conserved region, putative	7		1.05587	0.464309	27.4799	27.5956	27.6539	27.8029	27.6171	27.5371	1.87182e+08	2.02815e+08	2.11185e+08	2.34162e+08	2.0586e+08	1.94751e+08
Tb927.10.9960	hypothetical protein, conserved	2		1.10047	0.428936	23.7934	24.0679	24.2054	24.1894	23.9701	24.3291	1.45391e+07	1.75859e+07	1.93443e+07	1.91311e+07	1.64329e+07	2.10766e+07
Tb927.10.9970	hypothetical protein, conserved	14		1.02571	0.735957	28.2901	28.4259	28.4259	28.5622	28.2842	28.396	3.28213e+08	3.60618e+08	3.60631e+08	3.96352e+08	3.26876e+08	3.53217e+08
Tb927.10.9990	non-canonical purine NTP pyrophosphatase, RdgB/HAM1 family, putative	3		1.05265	0.488799	27.0722	26.9728	26.9146	27.2031	26.9232	27.0461	1.41108e+08	1.31713e+08	1.26501e+08	1.54511e+08	1.27263e+08	1.38573e+08
Tb927.11.10020	short-chain dehydrogenase, putative	4		1.03514	0.620179	26.4081	26.723	26.6167	26.7163	26.5738	26.6211	8.90497e+07	1.10772e+08	1.029e+08	1.10255e+08	9.98855e+07	1.03217e+08
Tb927.11.10040	hypothetical protein, conserved	3		1.04788	0.588208	25.7613	26.0031	26.1802	26.117	25.9687	26.0875	5.68752e+07	6.72548e+07	7.60388e+07	7.27756e+07	6.56699e+07	7.13067e+07
Tb927.11.10060	Biotin--acetyl-CoA-carboxylase ligase, putative	10		0.854904	0.078017	31.0876	31.038	30.9374	30.9648	30.6951	30.7125	2.28188e+09	2.2048e+09	2.05629e+09	2.09575e+09	1.73838e+09	1.75948e+09
Tb927.11.10070	Bromodomain, putative	9		1.00556	0.941391	28.7742	28.8284	28.734	28.8922	28.666	28.795	4.59083e+08	4.76663e+08	4.46472e+08	4.98212e+08	4.25932e+08	4.65756e+08
Tb927.11.10080	LSU ribosomal protein, mitochondrial, putative	3		0.998177	0.998207	26.0694	26.0911	26.2607	26.1524	26.1183	26.15	7.04148e+07	7.14813e+07	8.04024e+07	7.45861e+07	7.28456e+07	7.44614e+07
Tb927.11.10090	hypothetical protein, conserved	9		0.938005	0.435381	27.3138	27.5599	27.5585	27.357	27.2906	27.5121	1.66834e+08	1.97853e+08	1.97669e+08	1.71902e+08	1.64174e+08	1.91417e+08
Tb927.11.1010	chaperone protein DnaJ, putative	5		0.842945	0.198188	26.7276	27.088	27.1945	26.6586	26.8565	26.7889	1.11123e+08	1.42656e+08	1.53588e+08	1.05932e+08	1.21509e+08	1.15948e+08
Tb927.11.10110	actin-like protein, putative	4		0.747957	0.0957304	25.5904	25.8308	25.9504	25.0371	25.4455	25.5985	5.0523e+07	5.96844e+07	6.48412e+07	3.44294e+07	4.56936e+07	5.08056e+07
Tb927.11.10120	hypothetical protein, conserved	9		1.06803	0.227255	26.4223	26.3071	26.4978	26.5817	26.4663	26.4674	8.99302e+07	8.30258e+07	9.47629e+07	1.00434e+08	9.27141e+07	9.27828e+07
Tb927.11.10130	hypothetical protein, conserved	4		0.936896	0.468194	25.9355	26.0225	26.0419	26.1198	25.6832	25.8839	6.41747e+07	6.81626e+07	6.90866e+07	7.29177e+07	5.38767e+07	6.19188e+07
Tb927.11.10140	hypothetical protein, conserved	5		0.955477	0.547011	28.0088	28.2498	28.2554	28.1377	28.0093	28.178	2.70083e+08	3.19181e+08	3.20417e+08	2.95309e+08	2.70178e+08	3.03691e+08
Tb927.11.10150	Enoyl-CoA hydratase/isomerase family, putative	22		0.939989	0.431492	28.4059	28.7107	28.6334	28.4802	28.4586	28.5586	3.55663e+08	4.39321e+08	4.16393e+08	3.74456e+08	3.68875e+08	3.95349e+08
Tb927.11.1020	ribokinase, putative	8		0.885716	0.214413	30.9452	31.0968	30.9844	31.0568	30.7029	30.7174	2.06751e+09	2.29655e+09	2.12439e+09	2.23366e+09	1.74778e+09	1.76548e+09
Tb927.11.10200	hypothetical protein, conserved	10		1.12382	0.0564798	27.528	27.6993	27.64	27.8657	27.7333	27.7755	1.93535e+08	2.1793e+08	2.09154e+08	2.44571e+08	2.23133e+08	2.29757e+08
Tb927.11.10210	hypothetical protein, conserved	4		0.874591	0.257607	26.4852	26.8866	26.8476	26.6602	26.464	26.5413	9.39357e+07	1.24069e+08	1.20761e+08	1.06054e+08	9.25687e+07	9.76591e+07
Tb927.11.10220	hypothetical protein, conserved	2		1.01482	0.80127	26.3576	26.5216	26.6075	26.4354	26.5239	26.5975	8.59844e+07	9.63354e+07	1.02247e+08	9.07521e+07	9.64921e+07	1.0154e+08
Tb927.11.10230	RNA polymerase-associated protein CDC73, putative	4		1.10894	0.487209	27.1899	27.7907	27.6027	27.8988	27.5061	27.6623	1.53105e+08	2.32185e+08	2.0382e+08	2.50255e+08	1.90611e+08	2.1242e+08
Tb927.11.10240	ATP-dependent protease subunit HslV	3		0.95215	0.581755	29.4816	29.8256	29.7501	29.6109	29.594	29.6613	7.4962e+08	9.51452e+08	9.02944e+08	8.19935e+08	8.10391e+08	8.49088e+08
Tb927.11.10260	Peroxin 3, putative	11		0.934687	0.31616	28.4545	28.5891	28.4782	28.5507	28.2859	28.3841	3.67847e+08	4.03821e+08	3.73936e+08	3.93198e+08	3.27269e+08	3.50315e+08
Tb927.11.10270	Golgi SNAP receptor complex member 1, putative	2		0.966844	0.690324	25.811	26.1054	25.9469	25.9453	25.7744	26.0031	5.88691e+07	7.21948e+07	6.46849e+07	6.4613e+07	5.73932e+07	6.72524e+07
Tb927.11.10280	metallo-peptidase, Clan MC, Family M14, putative	2		1.52898	0.249503	20.6414	22.2083	22.3297	22.5576	22.1693	22.7552	1.63566e+06	4.84567e+06	5.2713e+06	6.17333e+06	4.71671e+06	7.07951e+06
Tb927.11.1030	kinetoplastid kinetochore protein 7	3		1.18156	0.38279	24.4334	24.1172	24.1704	24.8335	24.4	24.1445	2.26566e+07	1.81968e+07	1.88802e+07	2.98962e+07	2.21377e+07	1.8545e+07
Tb927.11.10300	hypothetical protein, conserved	8		1.16438	0.154746	27.8454	27.759	27.769	28.22	27.9655	27.8194	2.4115e+08	2.2714e+08	2.2872e+08	3.12646e+08	2.6209e+08	2.36846e+08
Tb927.11.10330	regulator of chromosome condensation 1-like protein	7		1.11388	0.157328	25.7965	25.8184	25.7898	26.1243	25.864	25.8677	5.82809e+07	5.91719e+07	5.80098e+07	7.31451e+07	6.10697e+07	6.12304e+07
Tb927.11.10340	Serine/threonine-protein phosphatase PGAM5, mitochondrial, putative	5		1.11703	0.264778	26.9329	27.1389	27.3192	27.1843	27.3039	27.3995	1.28117e+08	1.47781e+08	1.67454e+08	1.52506e+08	1.65687e+08	1.77043e+08
Tb927.11.1040	TFIIF-like transcription factor subunit 1	2		0.837547	0.321927	24.646	24.5194	24.2912	23.7514	24.3848	24.4735	2.62535e+07	2.40471e+07	2.05291e+07	1.4122e+07	2.19059e+07	2.32953e+07
Tb927.11.10400	SSU ribosomal protein, mitochondrial, putative	3		0.877497	0.39086	25.7134	26.223	26.1815	25.7984	25.7677	26.0255	5.50182e+07	7.83257e+07	7.61047e+07	5.83568e+07	5.71272e+07	6.83066e+07
Tb927.11.10430	hypothetical protein, conserved	12		1.10628	0.164898	27.1197	27.2179	27.3047	27.4757	27.2459	27.3546	1.4583e+08	1.56095e+08	1.65778e+08	1.86647e+08	1.59154e+08	1.71611e+08
Tb927.11.10480	PQQ-like domain/WD domain, G-beta repeat/Utp21 specific WD40 associated putative domain containing protein, putative	14		1.11911	0.135059	27.4682	27.4567	27.5599	27.8044	27.5406	27.6161	1.85669e+08	1.84198e+08	1.9786e+08	2.34403e+08	1.95228e+08	2.05718e+08
Tb927.11.1050	ribosome production factor 1, putative	2		0.980649	0.72991	25.8199	25.9264	25.8433	25.8899	25.6743	25.9302	5.92347e+07	6.37726e+07	6.01997e+07	6.21781e+07	5.35458e+07	6.39378e+07
Tb927.11.10520	kinetoplastid kinetochore protein 2	13		1.12884	0.103527	27.0936	27.1815	27.1735	27.4433	27.18	27.3393	1.43216e+08	1.52213e+08	1.51365e+08	1.82498e+08	1.52051e+08	1.69808e+08
Tb927.11.10540	hypothetical protein, conserved	25		1.07903	0.151741	29.2262	29.3273	29.2689	29.4897	29.3224	29.3351	6.27992e+08	6.73605e+08	6.4687e+08	7.53863e+08	6.71331e+08	6.77254e+08
Tb927.11.10560	eukaryotic translation initiation factor 4 gamma 4	25		0.958398	0.585938	30.8016	30.6906	30.7867	30.914	30.57	30.5868	1.87162e+09	1.73295e+09	1.85237e+09	2.02325e+09	1.59398e+09	1.6127e+09
Tb927.11.10570	LSU ribosomal protein, mitochondrial, putative	3		0.859705	0.5556	25.7537	26.6377	26.0455	25.9294	25.8637	26.1211	5.65784e+07	1.04413e+08	6.92576e+07	6.39024e+07	6.10573e+07	7.29869e+07
Tb927.11.10580	COG (conserved oligomeric Golgi) complex component, COG2/Domain of unknown function (DUF3510), putative	7		1.00074	0.956572	25.2553	25.2917	25.6649	25.3978	25.5572	25.2835	4.00498e+07	4.10743e+07	5.3198e+07	4.4207e+07	4.9373e+07	4.08409e+07
Tb927.11.10620	hypothetical protein, conserved	5		0.992682	0.944004	26.0833	26.6453	26.7418	26.5337	26.4151	26.5688	7.10969e+07	1.04959e+08	1.12221e+08	9.71465e+07	8.94816e+07	9.95396e+07
Tb927.11.10640	DNA-(apurinic or apyrimidinic site) lyase, putative	4		0.941015	0.191957	25.3357	25.4446	25.2783	25.2621	25.2239	25.313	4.23448e+07	4.5665e+07	4.06934e+07	4.02383e+07	3.91883e+07	4.16851e+07
Tb927.11.10650	Adaptor protein complex AP-3 subunit beta-3	9		0.904723	0.480465	26.2519	26.593	26.7736	26.5483	26.3821	26.2905	7.99116e+07	1.01229e+08	1.14723e+08	9.81364e+07	8.74571e+07	8.20809e+07
Tb927.11.10670	glycosyl hydrolase, putative	5		1.34531	0.260934	26.2097	25.5118	25.3639	26.5458	26.0669	25.8042	7.76063e+07	4.78427e+07	4.31801e+07	9.7969e+07	7.02961e+07	5.85934e+07
Tb927.11.10690	hypothetical protein, conserved	9		1.09069	0.410753	26.6448	27.1536	26.8147	27.0597	26.9514	27.0228	1.04926e+08	1.49293e+08	1.18038e+08	1.39886e+08	1.29773e+08	1.36357e+08
Tb927.11.1070	glycosomal transporter (GAT3), putative	7		1.2449	0.105849	26.5293	26.7931	26.801	27.2081	26.7962	27.0537	9.68515e+07	1.16287e+08	1.16921e+08	1.55044e+08	1.16537e+08	1.39309e+08
Tb927.11.10710	hypothetical protein, conserved	2		1.14698	0.212519	22.5306	22.4226	22.513	22.8285	22.4342	22.7689	6.05893e+06	5.62179e+06	5.98535e+06	7.4485e+06	5.6673e+06	7.14685e+06
Tb927.11.10720	hypothetical protein, conserved	6		1.08356	0.0912179	25.7042	25.726	25.6572	25.8488	25.7157	25.8664	5.46675e+07	5.55019e+07	5.29178e+07	6.04323e+07	5.51069e+07	6.1175e+07
Tb927.11.10730	SWI/SNF-related helicase, putative	3		2.55967	0.17995	20.7736	20.5529	20.2961	22.8313	21.3866	20.6252	1.79256e+06	1.53835e+06	1.28749e+06	7.46263e+06	2.74159e+06	1.61736e+06
Tb927.11.10740	vacuolar sorting-associated protein-like, putative	3		0.659513	0.394506	22.1149	23.528	22.9645	20.8826	22.8282	22.737	4.54208e+06	1.20954e+07	8.18485e+06	1.93323e+06	7.44662e+06	6.9908e+06
Tb927.11.10750	pre-mRNA-splicing factor CWC22, putative	3		1.09874	0.272136	24.323	24.1679	24.4853	24.3715	24.4464	24.5759	2.09866e+07	1.88478e+07	2.34863e+07	2.1704e+07	2.28607e+07	2.50081e+07
Tb927.11.10760	kinesin-D	28		1.08161	0.170586	30.9092	31.036	30.9873	31.1688	30.9813	31.1184	2.01646e+09	2.20177e+09	2.12873e+09	2.41401e+09	2.11978e+09	2.33112e+09
Tb927.11.10770	VHS domain containing protein, putative	9		1.03542	0.49654	27.8058	27.9981	27.9435	27.9527	27.9094	28.0397	2.34627e+08	2.68087e+08	2.5813e+08	2.59774e+08	2.521e+08	2.7592e+08
Tb927.11.10790	40S ribosomal protein SA, putative	12		1.00503	0.938744	33.0576	33.357	33.3245	33.368	33.121	33.2794	8.93962e+09	1.10015e+10	1.07568e+10	1.10858e+10	9.34118e+09	1.04254e+10
Tb927.11.1080	Nucleolar protein 60	3		1.1091	0.464407	25.0305	25.5712	25.2101	25.4947	25.206	25.586	3.42705e+07	4.98532e+07	3.88145e+07	4.72782e+07	3.87052e+07	5.03677e+07
Tb927.11.10800	Domain of unknown function (DUF4496), putative	4		1.01667	0.774861	26.9308	26.8926	26.9392	27.0746	26.8653	26.8854	1.27933e+08	1.2459e+08	1.2868e+08	1.41338e+08	1.22254e+08	1.23966e+08
Tb927.11.10820	Casein kinase II subunit beta, putative	4		1.06712	0.647292	26.915	26.4322	26.7086	27.0086	26.7817	26.5506	1.26541e+08	9.05491e+07	1.09671e+08	1.35023e+08	1.15374e+08	9.82957e+07
Tb927.11.10840	hypothetical protein, conserved	12		1.14566	0.524361	27.4768	27.1827	27.1815	27.8825	27.2977	27.1651	1.86784e+08	1.52341e+08	1.5221e+08	2.47432e+08	1.64979e+08	1.50492e+08
Tb927.11.10860	20S-pre-rRNA D-site endonuclease NOB1	8		0.888306	0.104211	26.268	26.4924	26.4858	26.2404	26.1971	26.3051	8.08099e+07	9.44088e+07	9.39736e+07	7.92788e+07	7.69327e+07	8.29135e+07
Tb927.11.10870	32 kDa ER-associated protein	3		0.805399	0.182747	25.993	26.2611	26.2686	26.2098	25.6979	25.6216	6.67861e+07	8.04212e+07	8.084e+07	7.76138e+07	5.44288e+07	5.16264e+07
Tb927.11.10880	hypothetical protein, conserved	8		0.940462	0.422916	27.1309	27.139	27.2203	27.2417	26.8853	27.0772	1.4696e+08	1.47794e+08	1.56364e+08	1.58702e+08	1.23963e+08	1.41595e+08
Tb927.11.1090	calpain-like protein, putative	22		1.02652	0.663569	28.7693	28.8414	28.7418	28.9356	28.6977	28.8245	4.57522e+08	4.80972e+08	4.48893e+08	5.1345e+08	4.35369e+08	4.75367e+08
Tb927.11.10900	Component of motile flagella 9	5		0.934171	0.558149	26.5467	26.9726	26.8094	26.6979	26.5562	26.801	9.80295e+07	1.31692e+08	1.1761e+08	1.0886e+08	9.86792e+07	1.16928e+08
Tb927.11.10950	DnaJ domain containing protein, putative	4		0.983052	0.841315	25.0509	25.3388	25.2837	25.1505	25.2644	25.1981	3.47597e+07	4.24377e+07	4.08452e+07	3.72446e+07	4.03038e+07	3.84937e+07
Tb927.11.10960	2OG-Fe(II) oxygenase superfamily, putative	9		1.03454	0.728958	28.3317	28.5661	28.5654	28.6927	28.3554	28.5546	3.37816e+08	3.97413e+08	3.97235e+08	4.33875e+08	3.43425e+08	3.94273e+08
[truncated: 2,737 more rows]
