# Supplementary material
Source: HighWire-hosted journal article supplement (doi:10.1101/rna.079625.123)
Supplement: Supplemental_Table_4.docx [file Supplemental_Table_4.docx]

| **Table S4.**  **RIP qRT-PCR Primers** | **Sequence(5’-3’)** |
| --- | --- |
| **For_927.10.9080:** | **TCGTCGTGATTGCAGGTTTC** |
| **Rev_927.10.9080:** | **TCTACGTCAAGATCGTCGCA** |
| **For_927.10.14270:** | **GCTGCCACCGTATTTGATGT** |
| **Rev_927.10.14270:** | **AACTACTCGGGTGGTGAAGG** |
| **For_927.10.5250:** | **ACGTCTCTTCTCGCAAGTCA** |
| **Rev_927.10.5250:** | **TTATAGCTCGCACCAAACGC** |
| **For_927.8.2080:** | **ACACCCGCACATTACCATTG** |
| **Rev_927.8.2080:** | **TGTCGCTTGTTTCAGTGCTT** |
| For_927.8.2780: | **GTTGGGCACTCCTTCATTCC** |
| Rev_927.8.2780: | **GCTGTGCAACAGTAGTGGAG** |
| **For_927.11.2400:** | **AAGTGAGTGCCCTTCGTACA** |
| **Rev_927.11.2400:** | **TCTTCCACCAACGTCAGGAA** |
| **For_927.8.1780:** | **AGTACCTGAGAGGCTCGTTG** |
| **Rev_927.8.1780:** | **AATGTCACGGTGGACGAAAC** |
| **For_927.1.3800:** | **ATGCACCGAATGCAACGATT** |
| **Rev_927.1.3800:** | **GAGGTAACCTGCGTCTTCCT** |
| **For_927.7.5980:** | **GCTGGCATCTTGGCTCTTAC** |
| **Rev_927.7.5980:** | **CGAAGCTGTGCCTTCTCTTC** |
| **For927.7.4390:** | **GGCTGACAGACATGAGCTTG** |
| **Rev927.7.4390:** | **CACATCCTTCAACCCGTTCC** |
| **For_927.7.6850:** | **GGTGTGAAGGTTTCGGAAGG** |
| **Rev_927.7.6850:** | **ATACCTCTGGTCCTGTCCCT** |
| **For_927.11.1480:** | **TGCCCACTTCCTAGTACACC** |
| **Rev_927.11.1480:** | **GCAACTTGCTAGGTTCCACA** |
| For_09.v4.0009: | **CGCTCCAGCAAACATCAACG** |
| Rev_09.v4.0009: | **ACGCATTGAAACCAGCGTTA** |
| **For_67_927.6.760:** | **GCAGAGGATGTGTGTACCCT** |
| **Rev_145_927.6.760:** | **AATGACAGGTGAGTGCTTGT** |
